# Supplementary material for: Optimal Multi-Stage Arrhythmia Classification Approach
Source: PubMed Central journal article supplement (PMC7031229; doi:10.1038/s41598-020-59821-7), 2020-02-19
Supplement: 41598_2020_59821_MOESM1_ESM.pdf [file 41598_2020_59821_MOESM1_ESM.pdf]

# Optimal Multi-Stage Arrhythmia Classification Approach

Jianwei Zheng<sup>1</sup>, Huimin Chu<sup>2</sup>, Daniele Struppa<sup>1</sup>, Jianming Zhang<sup>3</sup>, Sir Magdi Yacoub<sup>4</sup>, Hesham El-Askary<sup>1</sup>, Anthony Chang<sup>5</sup>, Louis Ehwerhemuepha<sup>1,5</sup>, Islam Abudayyeh<sup>6</sup>, Alexander Barrett<sup>1</sup>, Guohua Fu<sup>2</sup>, Hai Yao<sup>7</sup>, Dongbo Li<sup>2</sup>, Guo Hangyuan<sup>3</sup> (corresponding author) and Cyril Rakovski<sup>1</sup>

<sup>1</sup>Chapman University, Orange, CA, USA

<sup>2</sup>Ningbo First Hospital of Zhejiang University, Ningbo, Zhejiang, China

<sup>3</sup>Shaoxing People's Hospital (Shaoxing Hospital Zhejiang University, Shaoxing, Zhejiang, China School of Medicine)

<sup>4</sup>Imperial College London, London, England

<sup>5</sup>CHOC Children's Hospital, Orange, CA, USA

<sup>6</sup>Loma Linda University International Heart Institute, Loma Linda, Riverside, USA

<sup>7</sup>Zhejiang Cachet Jetboom Medical Devices CO.LTD, Hangzhou, Zhejiang, China

**Supplementary Materials**

## Section A.

### The definition of rhythm groups and rhythms

In this study, a total 11 rhythms whose definitions were shown below were merged into 4 groups (SB, AFIB, GSVT, SR). In particular, SB only included sinus bradycardia, AFIB consisted of atrial fibrillation and atrial flutter (AFL), GSVT contained supraventricular tachycardia, atrial tachycardia, atrioventricular node reentrant tachycardia, atrioventricular reentrant tachycardia and sinus atrium to atrial wandering rhythm, and SR included sinus rhythm and sinus irregularity. Thus, our classification model was designed to classify these 4 groups of arrhythmias.

### The definition table of 4 rhythm groups and the rhythms included.

| Group Name | Arrhythmia Included in Group                                                                                                                                                                                        |
|------------|---------------------------------------------------------------------------------------------------------------------------------------------------------------------------------------------------------------------|
| SB         | sinus bradycardia                                                                                                                                                                                                   |
| AFIB       | atrial fibrillation (AFIB), atrial flutter (AFL)                                                                                                                                                                    |
| GSVT       | supraventricular tachycardia (SVT), atrial tachycardia (AT), atrioventricular node reentrant tachycardia (AVNRT), atrioventricular reentrant tachycardia (AVRT) and sinus atrium to atrial wandering rhythm (SAAWR) |
| SR         | sinus rhythm without other conditions and sinus irregularity                                                                                                                                                        |

### The definition table of 11 Rhythms labeled by cardiologists.

| Acronym Name | Full Name           | Definition                                                                                                                                                                                                                                                                                                                                                                                                                                                                                   |
|--------------|---------------------|----------------------------------------------------------------------------------------------------------------------------------------------------------------------------------------------------------------------------------------------------------------------------------------------------------------------------------------------------------------------------------------------------------------------------------------------------------------------------------------------|
| SB           | Sinus Bradycardia   | Sinus bradycardia can be defined as a sinus rhythm with a resting heart rate of 60 beats per minute or less.                                                                                                                                                                                                                                                                                                                                                                                 |
| SR           | Sinus Rhythm        | Normal sinus rhythm usually accompanies a heart rate of 60 to 100 beats per minute, with less than 0.16 second variation in the shortest and longest duration between successive P waves, and normal PR interval, QRS complex and QT interval.                                                                                                                                                                                                                                               |
| AFIB         | Atrial Fibrillation | ECG showing atrial fibrillation will have no visible P waves that are replaced by coarse fibrillatory waves and an irregularly irregular QRS complex.                                                                                                                                                                                                                                                                                                                                        |
| ST           | Sinus Tachycardia   | Sinus tachycardia is recognized on an ECG with a normal upright P wave in lead II preceding every QRS complex, with an atrial rate of greater than 100 beats per minute.                                                                                                                                                                                                                                                                                                                     |
| AFL          | Atrial Flutter      | Atrial flutter is a health condition (arrhythmia) where the atria of the heart as an electrical problem (a re-entry loop) that causes the atria to beat at a rapid rate of about 242 - 360 beats per minute (bpm). Although usually flutter waves are regular and appear as "sawtooth" P waves in ECG's (typical atrial flutter); occasionally electrical conduction blocks can occur and produce 2:1, 3:1 or 4:1 wave or even appear as irregular bpm's resembling an irregular arrhythmia. |
| SI           | Sinus Irregularity  | A heart rate of 60 to 100 beats, P, QRS, T waves clear, normal PR interval, QRS complex, and AT interval, but the                                                                                                                                                                                                                                                                                                                                                                            |

|       |                                             |                                                                                                                                                                                                                                                                                                                                                                                                                                                                                                                                                                                                                                                    |
|-------|---------------------------------------------|----------------------------------------------------------------------------------------------------------------------------------------------------------------------------------------------------------------------------------------------------------------------------------------------------------------------------------------------------------------------------------------------------------------------------------------------------------------------------------------------------------------------------------------------------------------------------------------------------------------------------------------------------|
|       |                                             | difference of two consecutive RR intervals greater than 120 milliseconds                                                                                                                                                                                                                                                                                                                                                                                                                                                                                                                                                                           |
| SVT   | Supraventricular Tachycardia                | In this study, SVT refers to an abnormally fast (160~220 bpm) heart rhythm arising from improper electrical activity above the ventricle of the heart, but cannot confirm specified locations by ECG. The SVT might be atrial fibrillation, atrial flutter, or Wolff–Parkinson–White syndrome.                                                                                                                                                                                                                                                                                                                                                     |
| AT    | Atrial Tachycardia                          | Atrial tachycardia is a fast heart rhythm in which the electrical impulse originates in atrial tissue different than the sinoatrial node. Atrial electrical activation during atrial tachycardias is mostly regular and by definition at a rate faster than 100 bpm.                                                                                                                                                                                                                                                                                                                                                                               |
| AVNRT | Atrioventricular Node Reentrant Tachycardia | Rate: 118 to 264 bpm Rhythm: regular, narrow QRS complex (< 120 msec); regular, wide QRS complex ( $\geq$ 120 msec); may not see any P-wave activity in either type (atypical or typical) Atypical AVNRT: RP interval > PR interval; P waves negative in leads III and aVF Typical AVNRT: RP interval < PR interval; pseudo R wave in lead V1 with tachycardia, not with normal sinus rhythm; pseudo S wave in leads I, II, and aVF.                                                                                                                                                                                                               |
| AVRT  | Atrioventricular Reentrant Tachycardia      | Rate: 124 to 256 bpm Rhythm: regular, narrow QRS complex common (orthodromic); regular, wide QRS complex uncommon (orthodromic or antidromic) if bundle branch block or aberrancy present. Orthodromic AVRT: RP interval < PR interval or RP interval > PR interval with a slowly conducting accessory pathway; retrograde P waves (leads I, II, III, aVF, V1); delta wave seen with normal sinus rhythm, not with tachycardia. Antidromic AVRT: short RP interval (< 100 msec); regular, wide QRS complex ( $\geq$ 120 msec); delta waves are seen with normal sinus rhythm and tachycardia; concealed accessory pathways do not show delta waves |
| SAAWR | Sinus Atrium to Atrial Wandering Rhythm     | is an atrial rhythm with multiple P-wave morphologies (three or more), often occurring in a repetitive pattern at a rate of less than 100 bpm.                                                                                                                                                                                                                                                                                                                                                                                                                                                                                                     |

## Section B.

### Features extracted from 12-lead ECG demonstration.

For demonstration purposes, we used 36 graphics to show the features that are extracted from height, width, and prominence of QRS complex, non-QRS peaks, and valleys from 12 leads ECG. In addition, the four patient's ECG data that are assigned to SR, AFIB, GSVT, and SB were depicted in rows of each graphic below. The Y-axis presents the frequencies of height, width and prominence, and X-axis presents the scale that measures height, width and prominence of peaks and valleys. The unit step of the X-axis is: (the maximum of height, width or prominence - the minimum of height, width or prominence)/100.

# Lead I

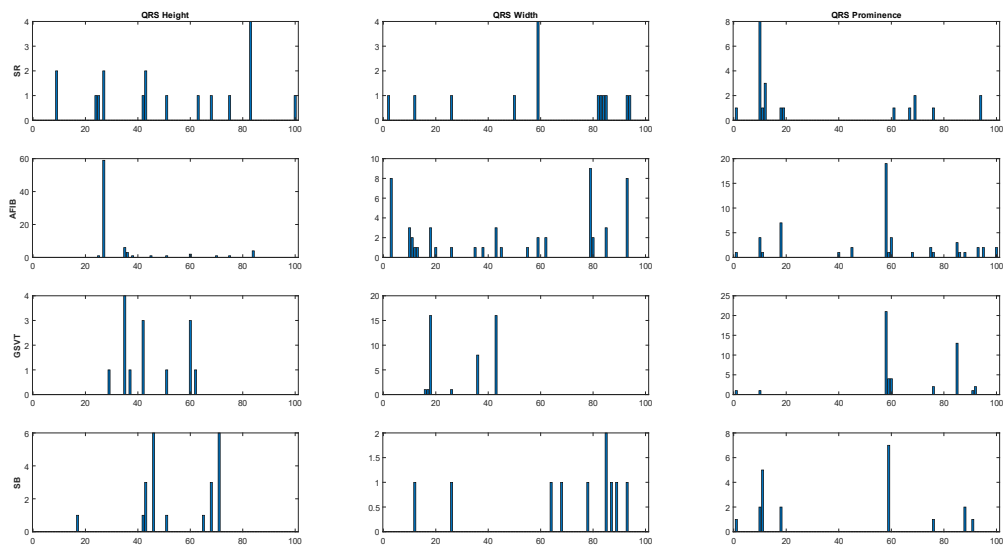



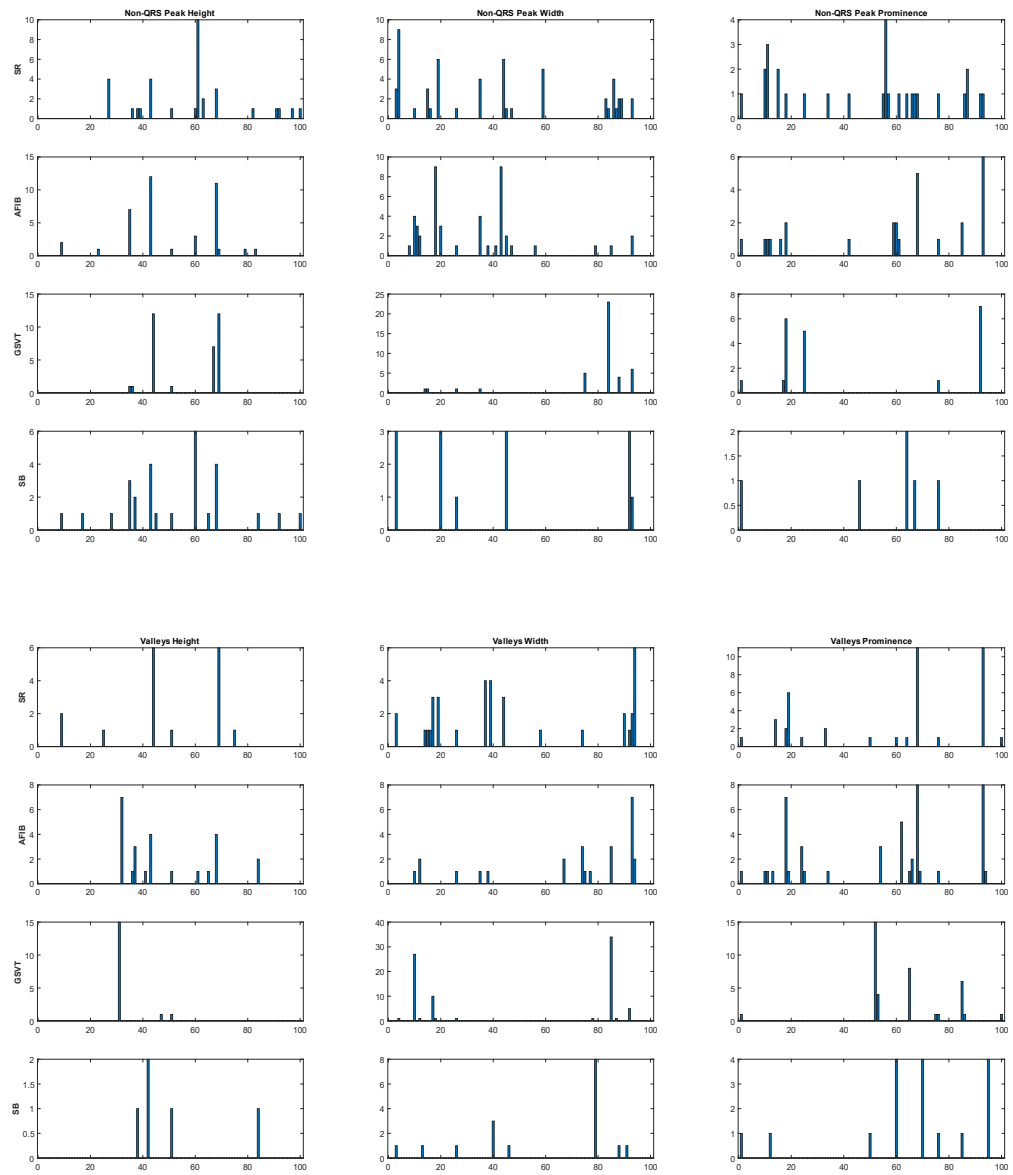

Lead II

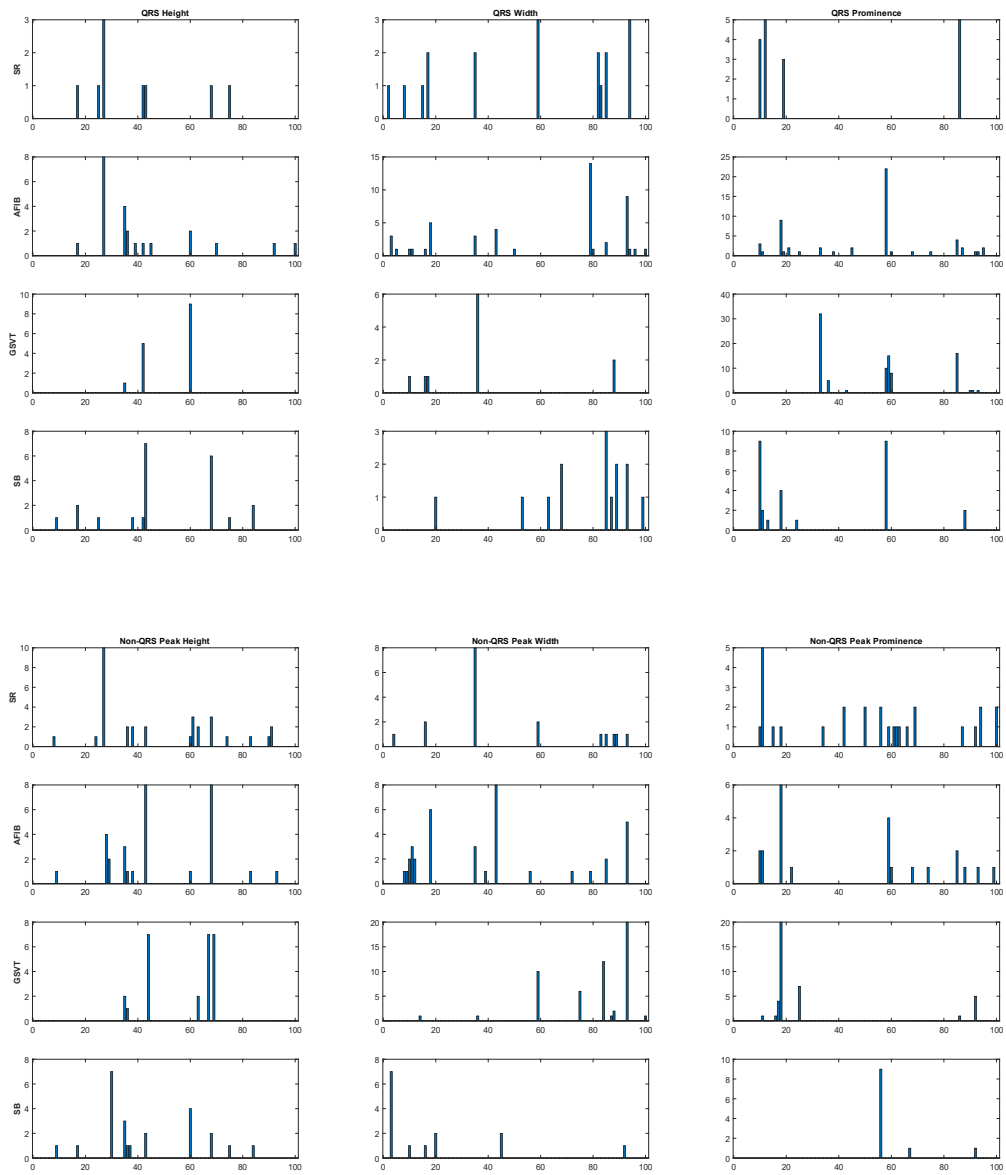

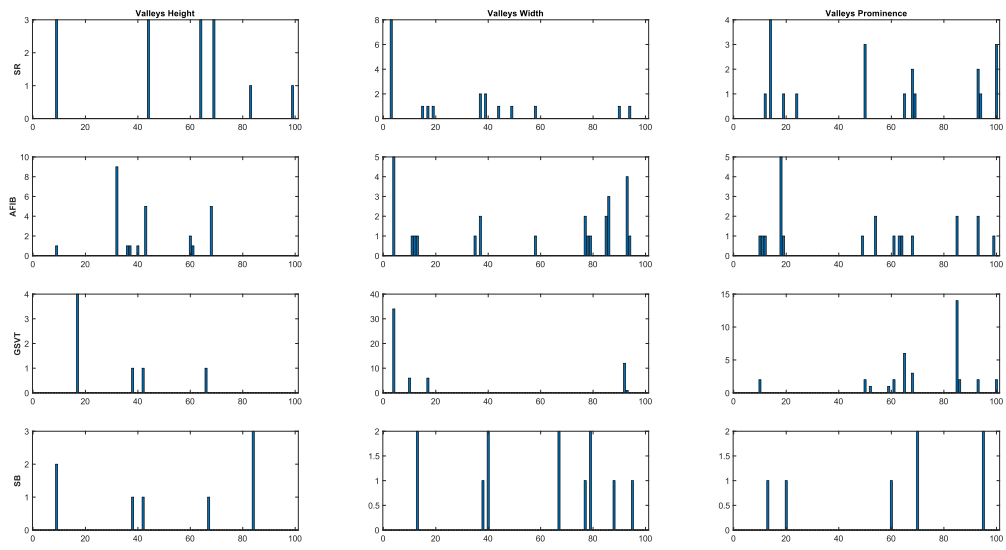

Lead III

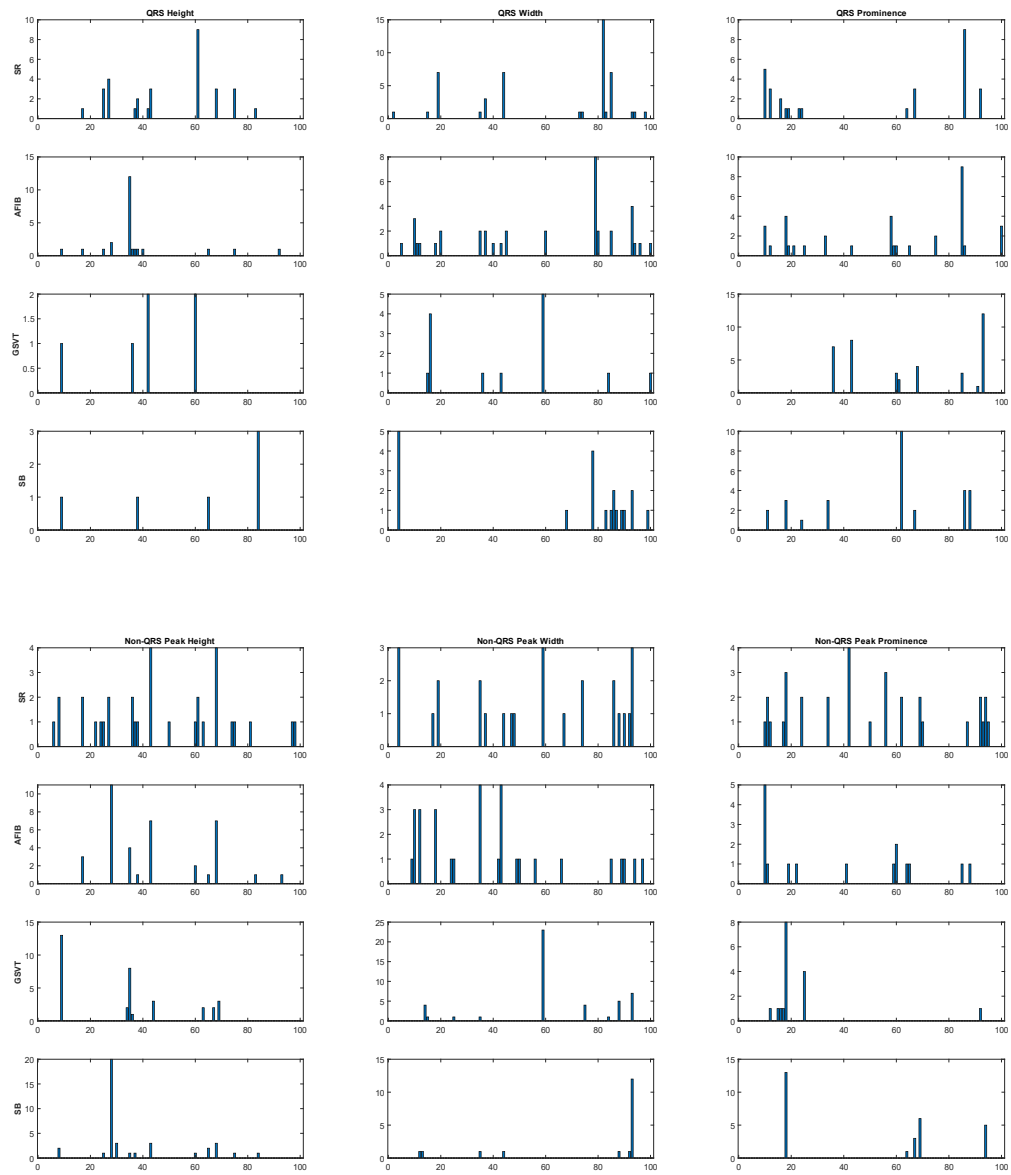

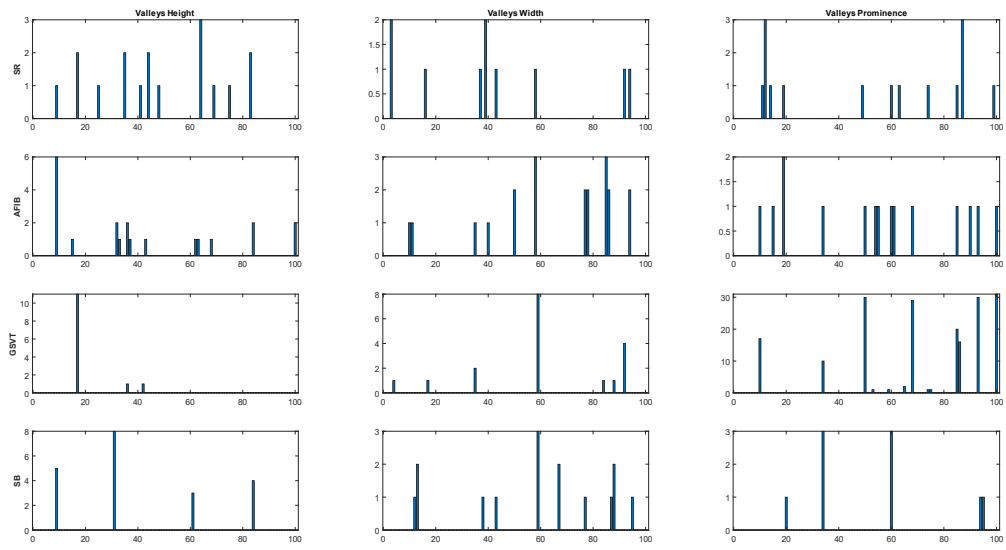

Lead aVR

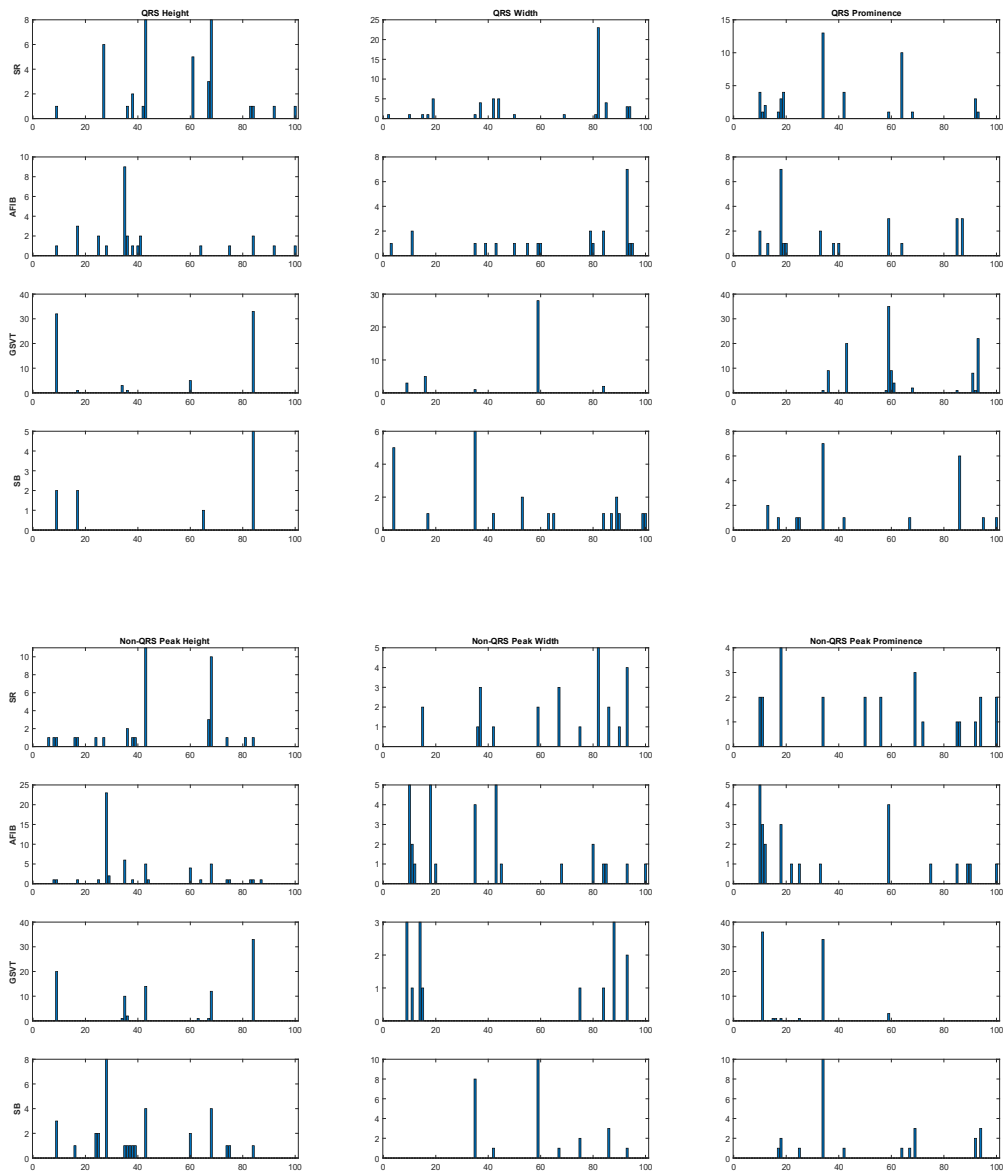

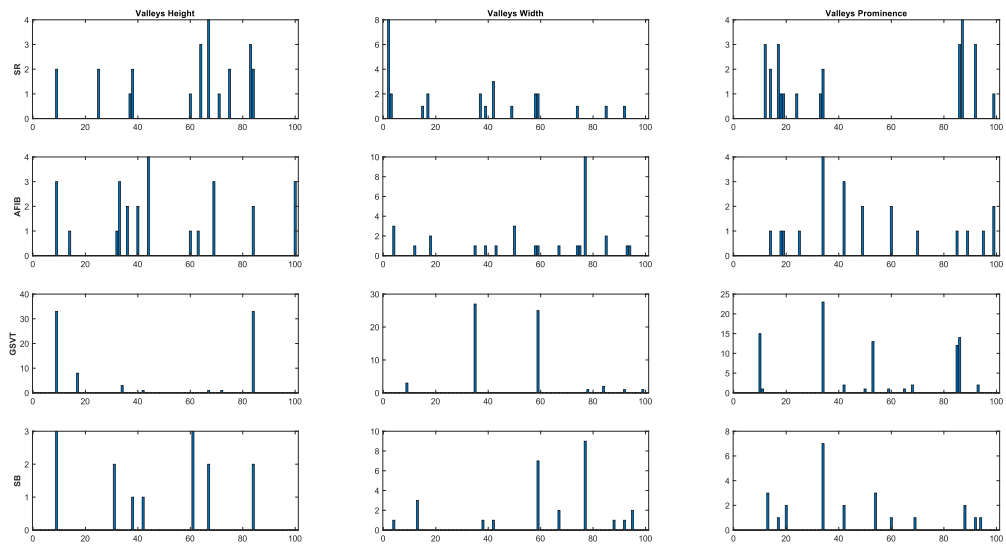

Lead aVF

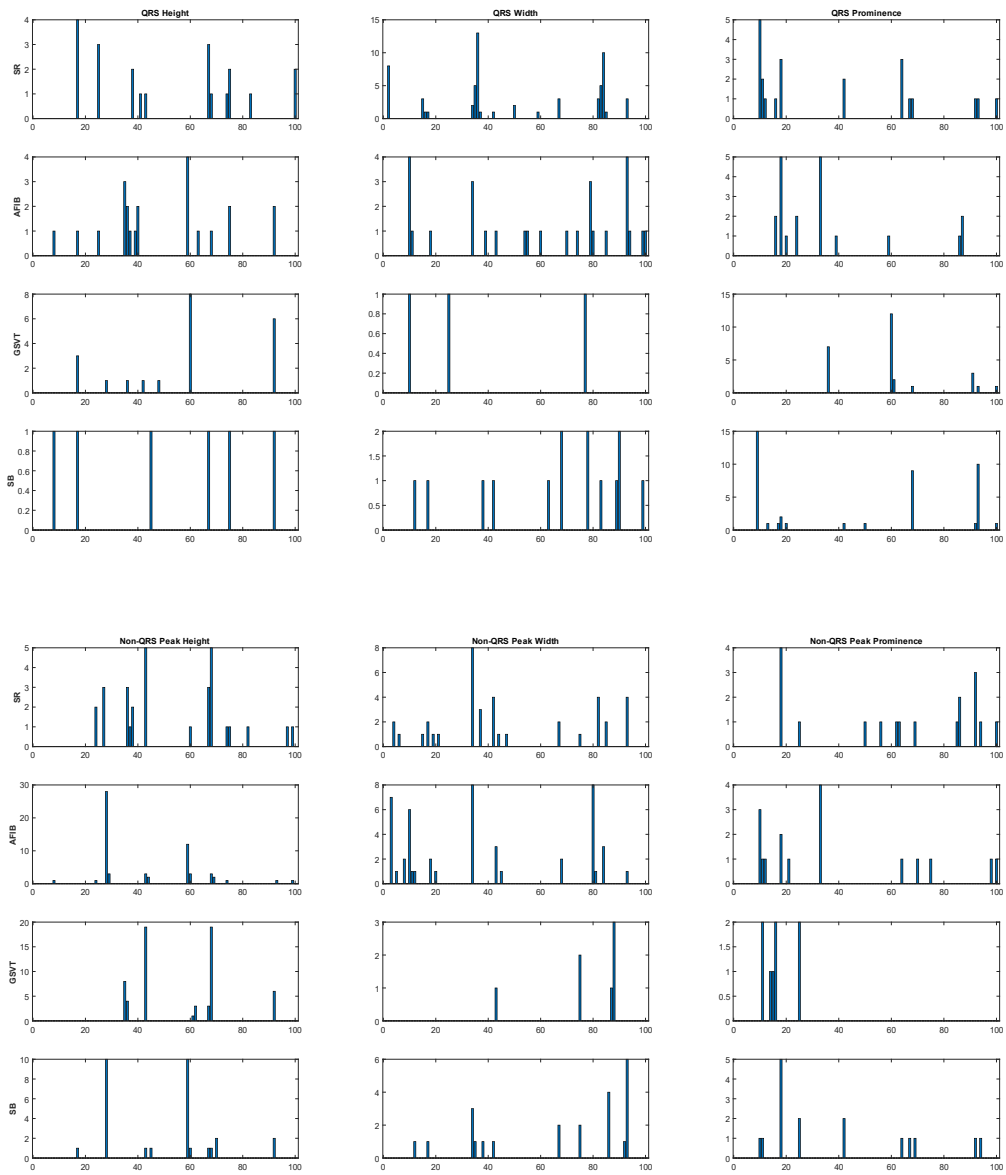



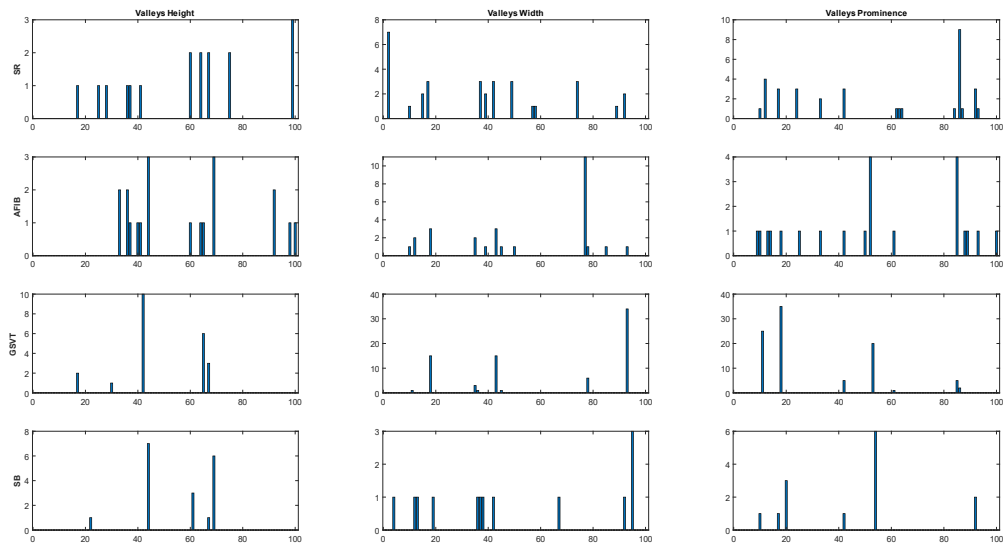

Lead aVL

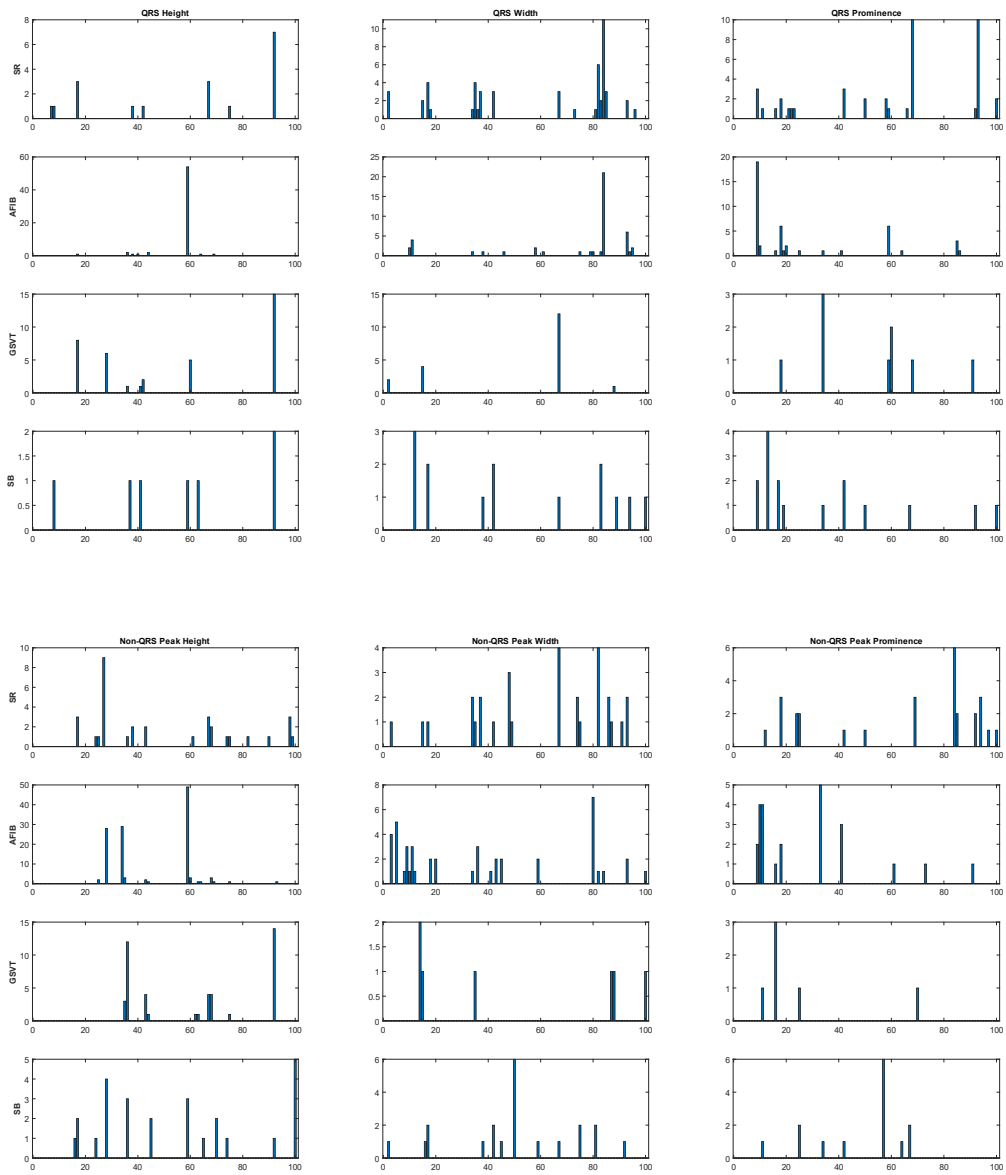

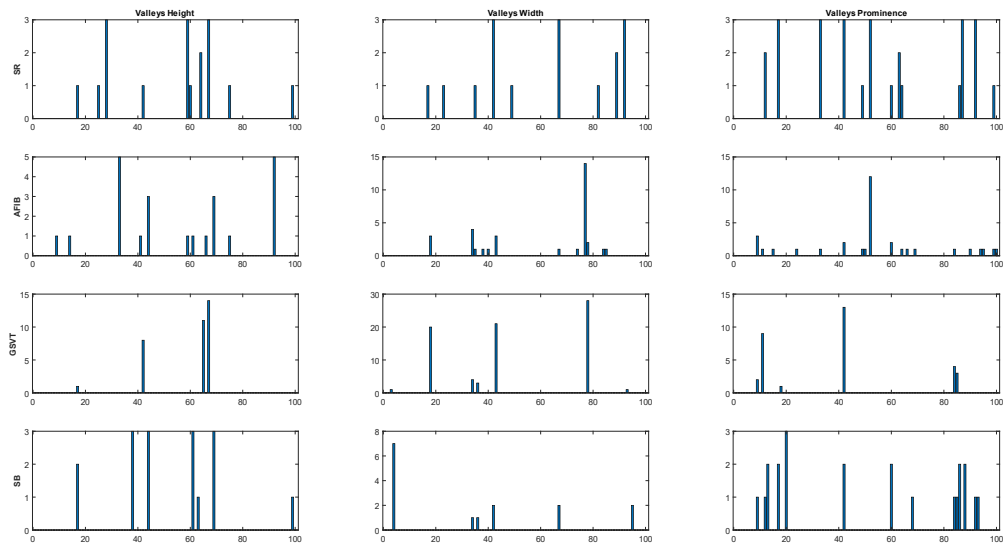

Lead V1

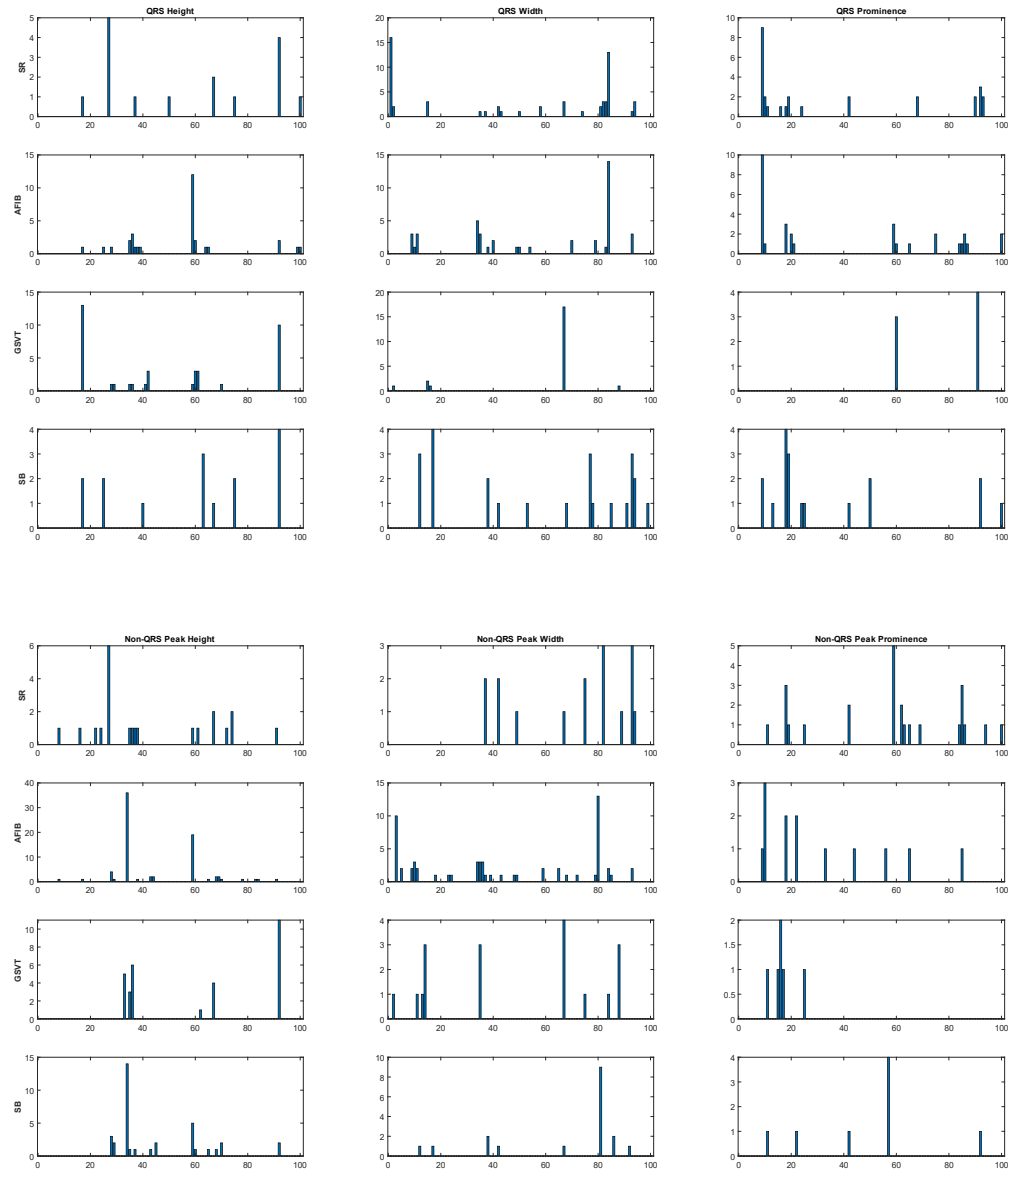

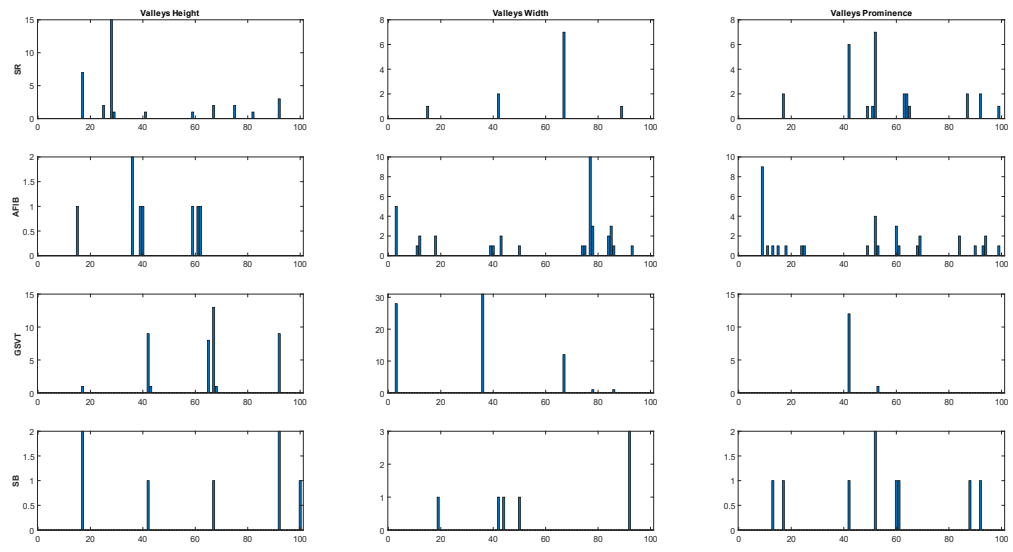

Lead V2

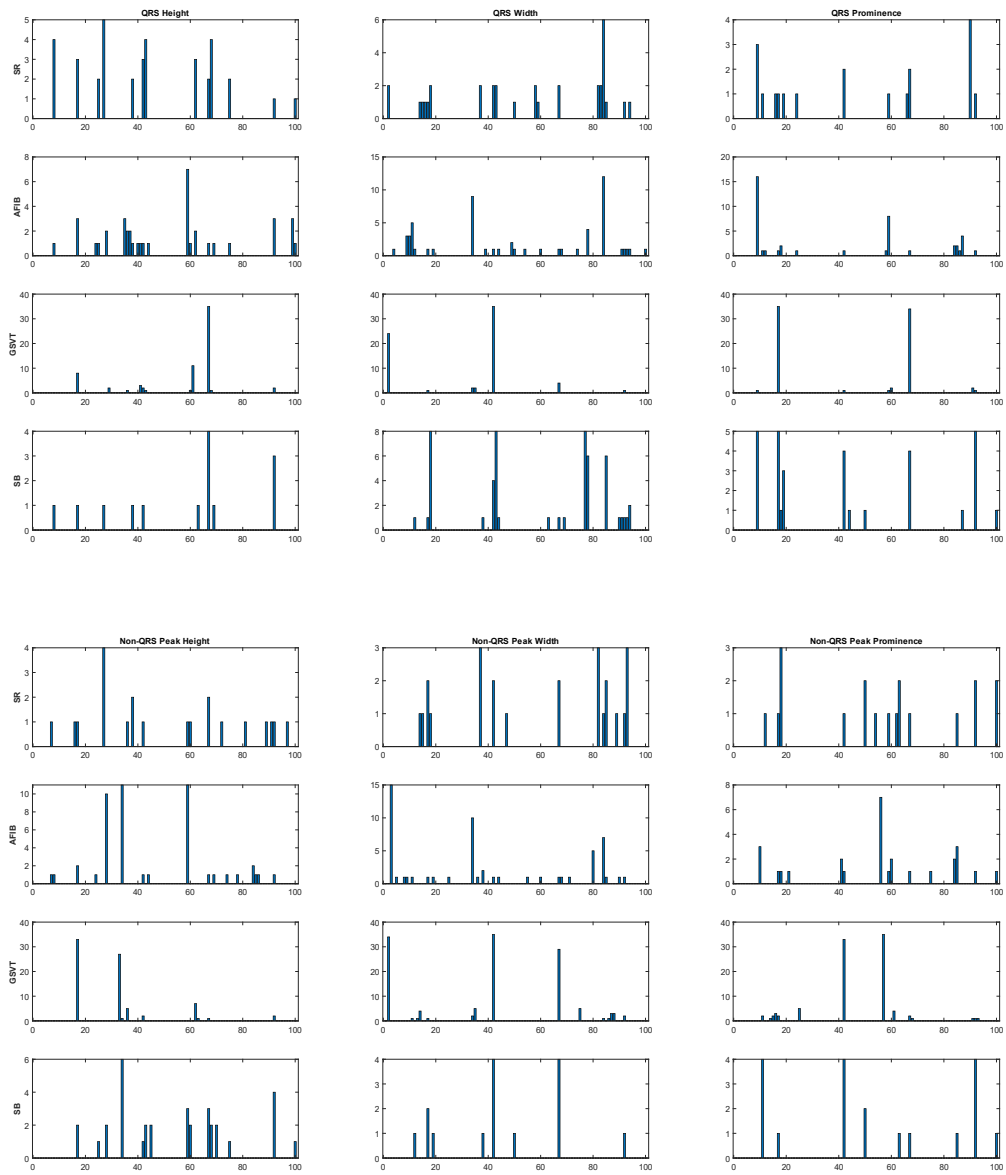

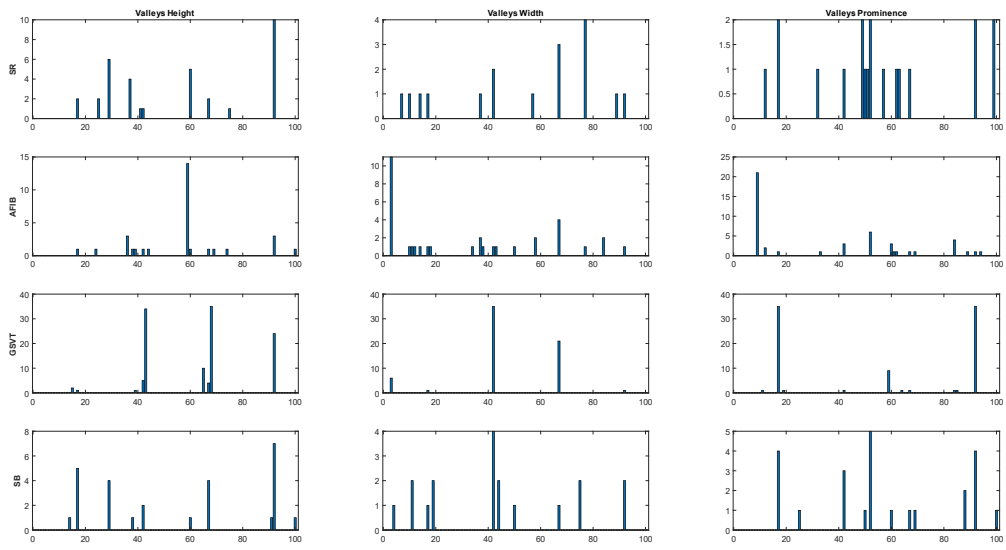

Lead V3

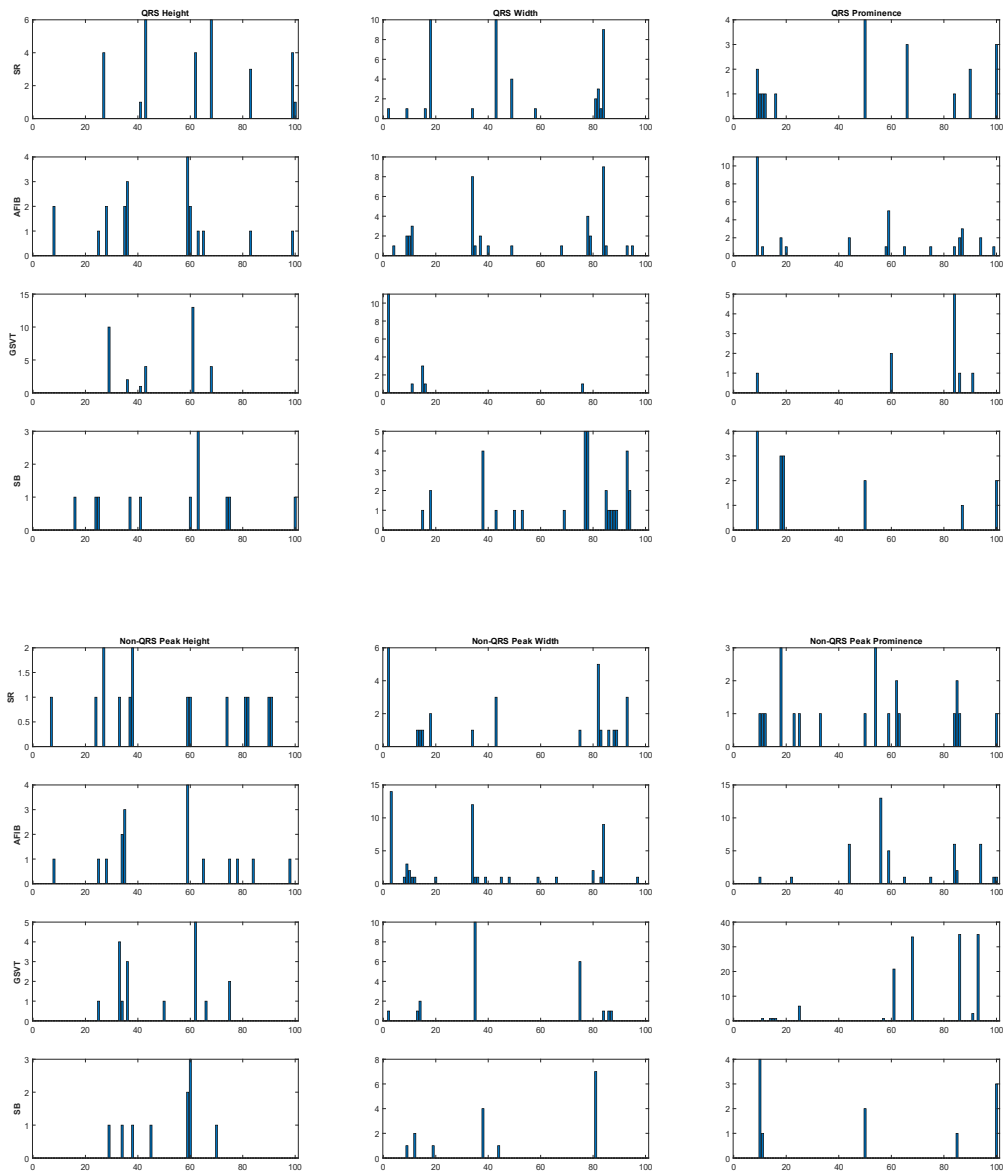



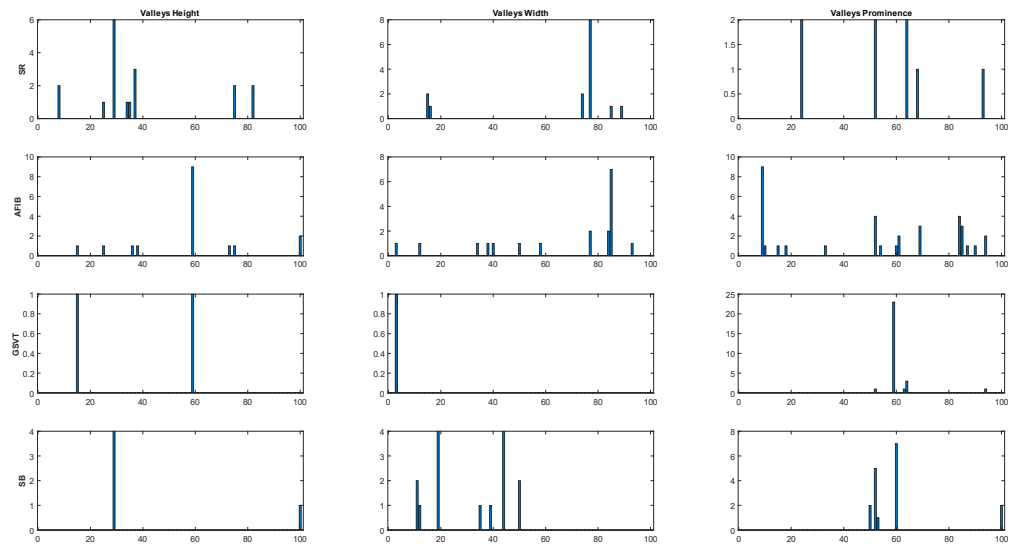

Lead V4

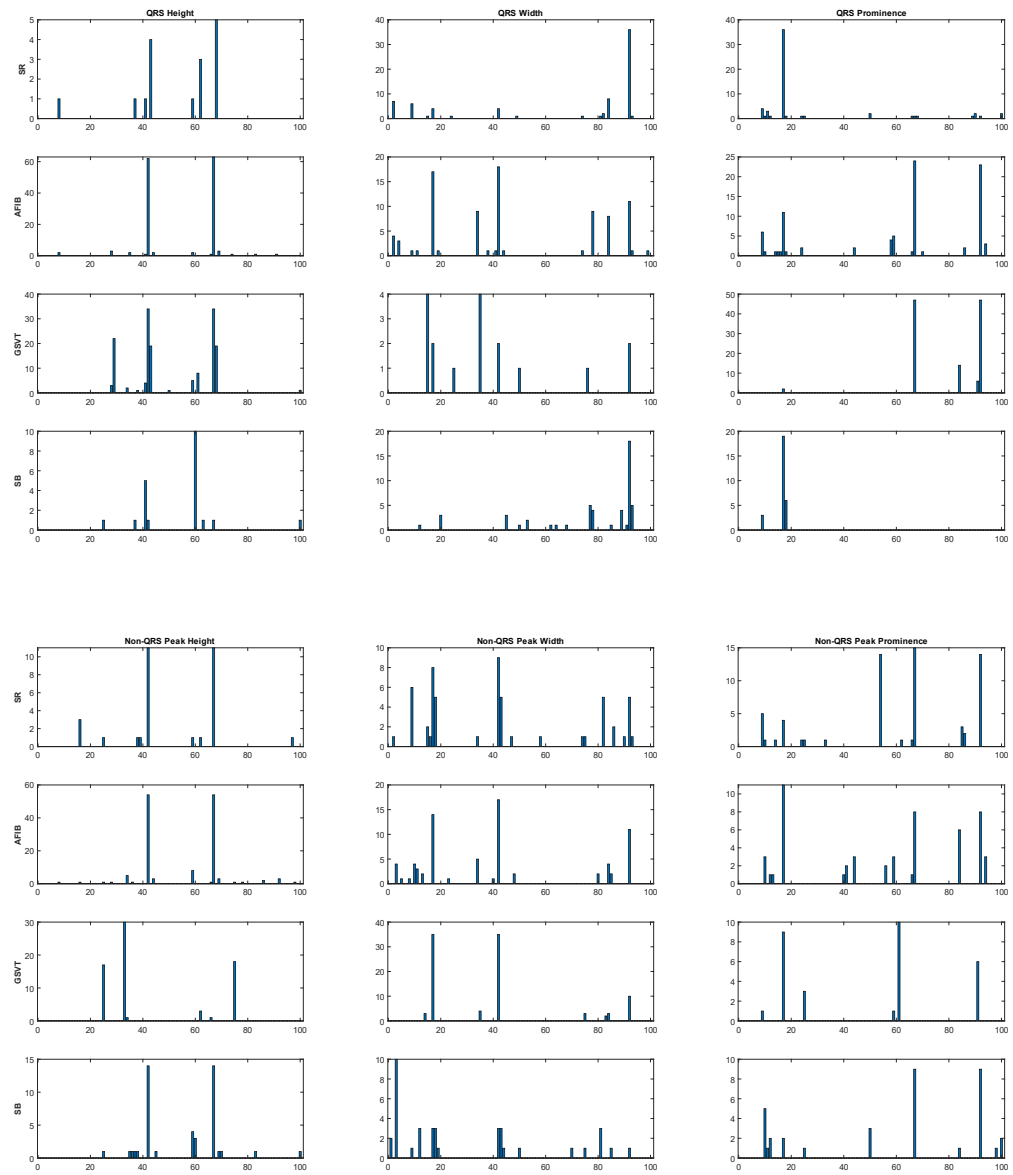

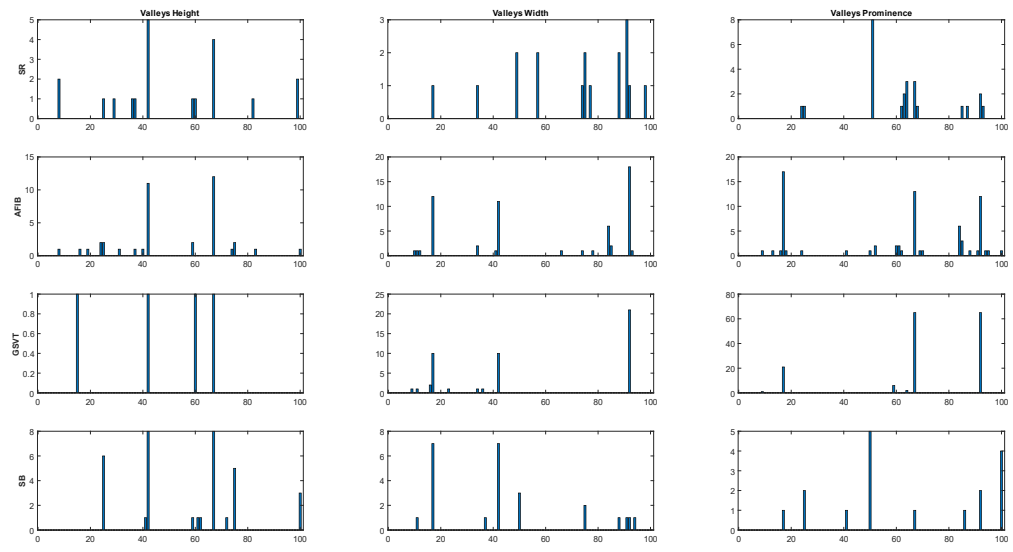

Lead V5

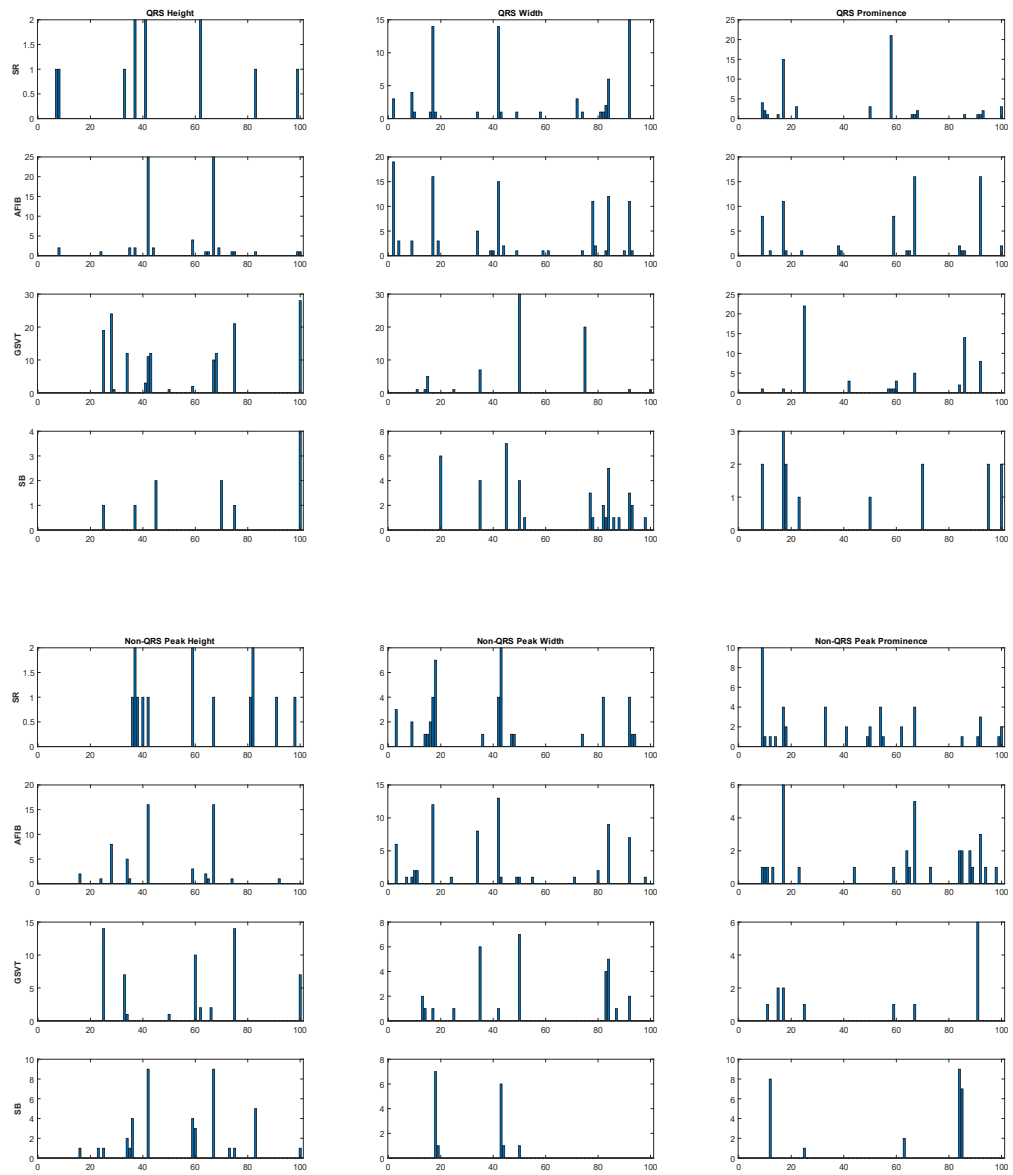

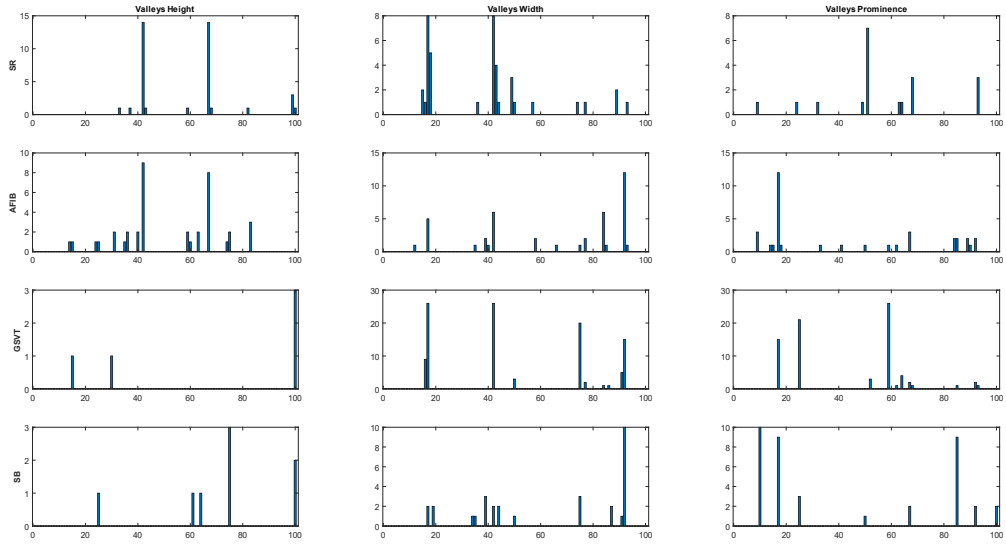

Lead V6

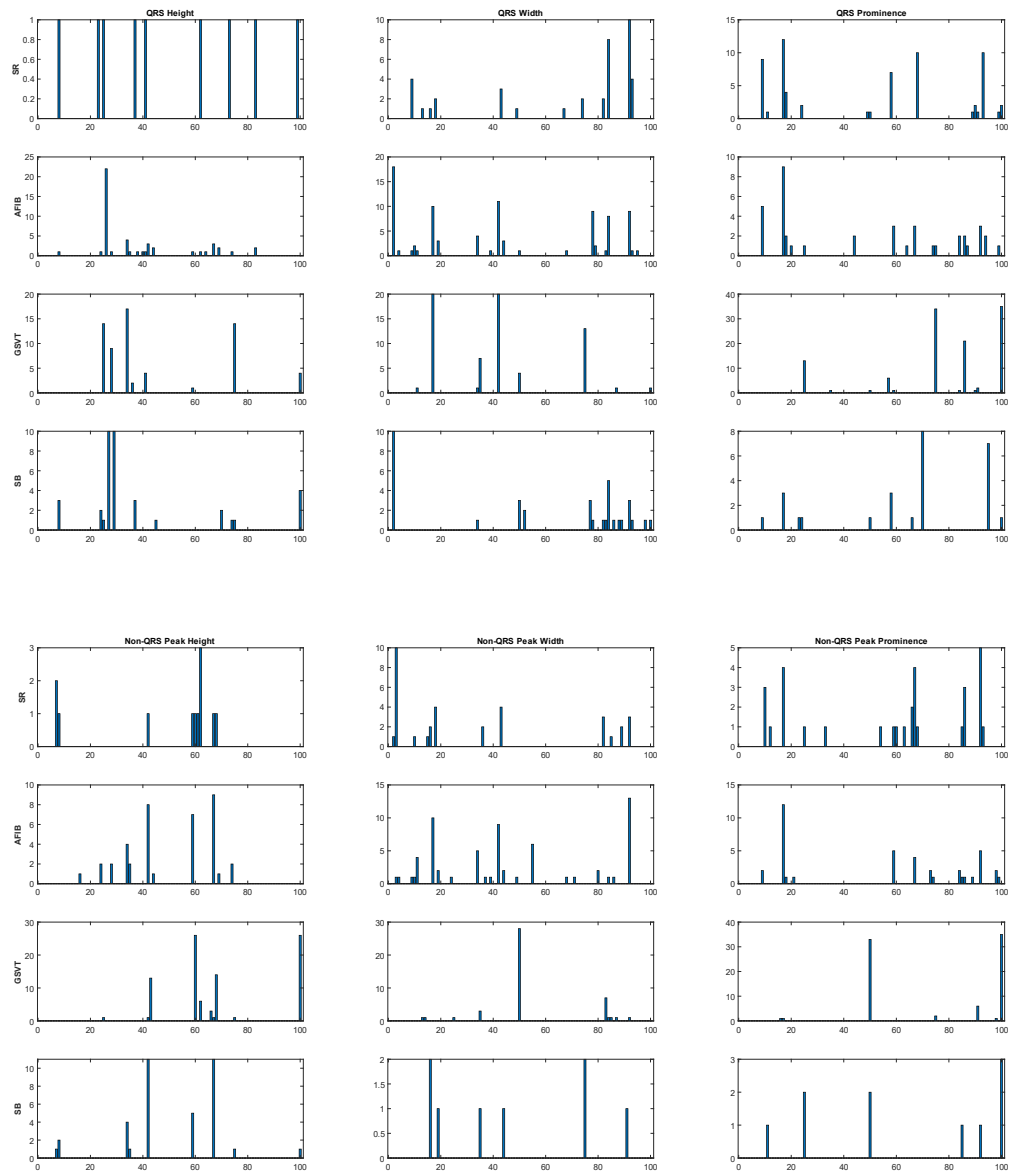

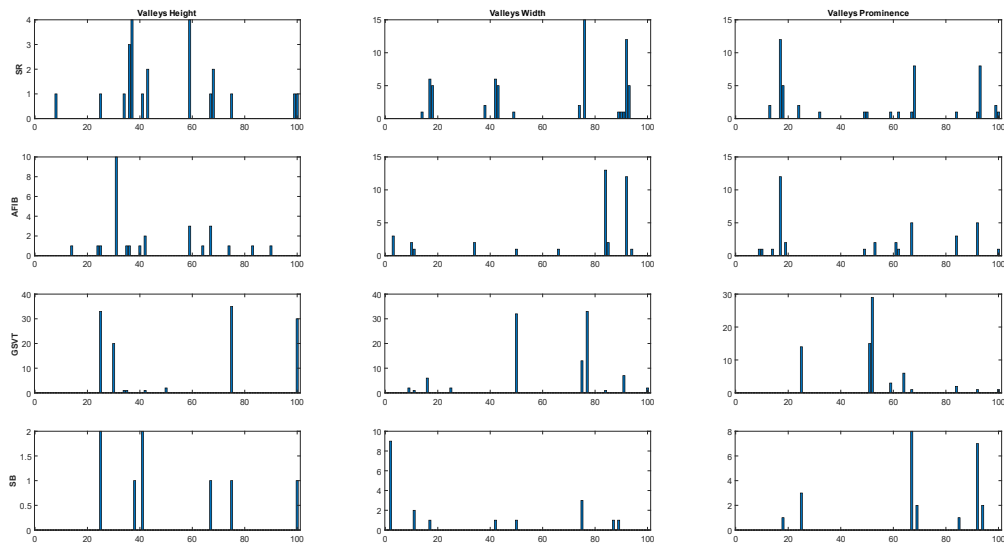

## Section C.

### Prsentation of 98 methods (models).

We compared a total of 98 methods (models) in the main paper list them below.

1) A total of 19 base classifiers below were studied:

Decision Tree (DT), K Nearest Neighbors (KNN), Nearest Centroid (NC), Gaussian Naive Bayesian (GNB), Multinomial Naive Bayesian (MNB), Complement Naive Bayesian (CNB), Bernoulli Naive Bayesian (BNB), Linear Classifier (LC), Quadratic Discriminant Analysis (QDA), Multinomial Logistic Regression (MLR), Multi-layer Perceptron Neural Net (MPN), Ridge Regression Classifier (RRC), Linear Classifiers with Stochastic Gradient Descent (LCSGD), Passive Aggressive Classifier (PAC), Linear SVC (SVC), Random Forest (RF), Extremely Randomized Trees (ERT), Gradient Boosting Tree (GBT) and Extreme Gradient Boosting Tree (EGBT)

2) Bagging classifier is a meta-estimator and uses above all 19 base classifiers as base classifiers.

3) This study, AdaBoost classifier is a meta-estimator and utilizes following base classifiers:

DT, GNB, MNB, CNB, BNB, MLR, RRC, LCSGD, and SVC.

4) Error-Correcting Output-Codes is another meta-estimator and use following base classifiers:

DT, KNN, GNB, MNB, CNB, BNB, MLR, LC, QDA, RRC, LCSGD, PAC, MPN, SVC, RF, ERT, and GBT.

5) One Vs Rest is a meta-estimator and use following base classifier:

DT, KNN, GNB, MNB, CNB, BNB, MLR, LC, QDA, RRC, LCSGD, PAC, MPN, SVC, RF, ERT, and GBT.

6) One Vs Rest is a meta-estimator and use following base classifier:

DT, KNN, GNB, MNB, CNB, BNB, MLR, LC, QDA, RRC, LCSGD, PAC, MPN, SVC, RF, ERT, and GBT.

## Section D

### Comparison result of 4, 312 classification schemes.

We trained 98 models as mentioned above by 22 datasets, and each dataset was derived by rescale and non-rescale transformation, respectively. Thus, a total of 4,312 classification schemes were compared, and the result was presented below.

Model Number: matches the sequence of the model presented in section C.

Dataset Number: 0 presents the dataset without other conditions, 1 presents the dataset with other conditions.

Featuregroup Number: matches with the feature group presented in Feature Groups Table introduced in the main manuscript.

Rescale: 0 presents the dataset with rescaling transformation (normalization), 1 presents the dataset without rescaling transformation.

The result of Model Number:Dataset Number:Featuregroup Number:Rescale of 0 : 0 : 0 : 0

|              | f1-score | precision | recall   | support |
|--------------|----------|-----------|----------|---------|
| AFIB         | 0.798803 | 0.796217  | 0.801431 | 875.0   |
| GSVT         | 0.808066 | 0.810576  | 0.805650 | 691.0   |
| SB           | 0.852640 | 0.850785  | 0.854507 | 1553.0  |
| SR           | 0.836917 | 0.840865  | 0.833037 | 907.0   |
| macro avg    | 0.824106 | 0.824611  | 0.823656 | 4026.0  |
| micro avg    | 0.829749 | 0.829749  | 0.829749 | 4026.0  |
| weighted avg | 0.829747 | 0.829789  | 0.829749 | 4026.0  |

The result of Model Number:Dataset Number:Featuregroup Number:Rescale of 0 : 0 : 0 : 1

|              | f1-score | precision | recall   | support |
|--------------|----------|-----------|----------|---------|
| AFIB         | 0.651113 | 0.646856  | 0.655484 | 875.0   |
| GSVT         | 0.670466 | 0.676170  | 0.664946 | 691.0   |
| SB           | 0.713801 | 0.712247  | 0.715364 | 1553.0  |
| SR           | 0.696406 | 0.699202  | 0.693642 | 907.0   |
| macro avg    | 0.682947 | 0.683619  | 0.682359 | 4026.0  |
| micro avg    | 0.688803 | 0.688803  | 0.688803 | 4026.0  |
| weighted avg | 0.688820 | 0.688904  | 0.688803 | 4026.0  |

The result of Model Number:Dataset Number:Featuregroup Number:Rescale of 0 : 0 : 1 : 0

|              | f1-score | precision | recall   | support |
|--------------|----------|-----------|----------|---------|
| AFIB         | 0.786199 | 0.789069  | 0.783403 | 875.0   |
| GSVT         | 0.799788 | 0.789373  | 0.810549 | 691.0   |
| SB           | 0.843057 | 0.833772  | 0.852557 | 1553.0  |
| SR           | 0.798976 | 0.821048  | 0.778104 | 907.0   |
| macro avg    | 0.807005 | 0.808315  | 0.806154 | 4026.0  |
| micro avg    | 0.813544 | 0.813544  | 0.813544 | 4026.0  |
| weighted avg | 0.813343 | 0.813569  | 0.813544 | 4026.0  |

The result of Model Number:Dataset Number:Featuregroup Number:Rescale of 0 : 0 : 1 : 1

|      | f1-score | precision | recall   | support |
|------|----------|-----------|----------|---------|
| AFIB | 0.724635 | 0.727933  | 0.721412 | 875.0   |
| GSVT | 0.728157 | 0.720899  | 0.735624 | 691.0   |
| SB   | 0.767479 | 0.759115  | 0.776028 | 1553.0  |



SR 0.734010 0.751387 0.717422 907.0  
macro avg 0.738570 0.739834 0.737622 4026.0  
micro avg 0.744020 0.744020 0.744020 4026.0  
weighted avg 0.743878 0.744038 0.744020 4026.0

The result of Model Number:Dataset Number:Featuregroup Number:Rescale of 0 : 0 : 2 : 0

f1-score precision recall support  
AFIB 0.822272 0.824459 0.820146 875.0  
GSVT 0.838084 0.832180 0.844122 691.0  
SB 0.885954 0.876920 0.895192 1553.0  
SR 0.845455 0.863871 0.827839 907.0  
macro avg 0.847941 0.849357 0.846825 4026.0  
micro avg 0.854943 0.854943 0.854943 4026.0  
weighted avg 0.854773 0.854900 0.854943 4026.0

The result of Model Number:Dataset Number:Featuregroup Number:Rescale of 0 : 0 : 2 : 1

f1-score precision recall support  
AFIB 0.765499 0.762514 0.768563 875.0  
GSVT 0.779826 0.781470 0.778234 691.0  
SB 0.827812 0.825748 0.829890 1553.0  
SR 0.808715 0.814147 0.803373 907.0  
macro avg 0.795463 0.795970 0.795015 4026.0  
micro avg 0.801721 0.801721 0.801721 4026.0  
weighted avg 0.801731 0.801792 0.801721 4026.0

The result of Model Number:Dataset Number:Featuregroup Number:Rescale of 0 : 0 : 3 : 0

f1-score precision recall support  
AFIB 0.915545 0.945286 0.887792 204.0  
GSVT 0.932901 0.924550 0.941589 300.0  
SB 0.955084 0.948538 0.961723 892.0  
SR 0.939508 0.943472 0.935632 681.0  
macro avg 0.935759 0.940461 0.931684 2077.0  
micro avg 0.942999 0.942999 0.942999 2077.0  
weighted avg 0.942889 0.943092 0.942999 2077.0

The result of Model Number:Dataset Number:Featuregroup Number:Rescale of 0 : 0 : 3 : 1

f1-score precision recall support  
AFIB 0.736293 0.745750 0.727110 875.0  
GSVT 0.744438 0.738419 0.750677 691.0  
SB 0.796336 0.793942 0.798747 1553.0  
SR 0.776617 0.776291 0.776954 907.0  
macro avg 0.763421 0.763600 0.763372 4026.0  
micro avg 0.770018 0.770018 0.770018 4026.0  
weighted avg 0.769937 0.769962 0.770018 4026.0

The result of Model Number:Dataset Number:Featuregroup Number:Rescale of 0 : 0 : 4 : 0

f1-score precision recall support  
AFIB 0.796390 0.830882 0.764874 204.0

GSVT 0.744487 0.751434 0.738040 300.0  
SB 0.771714 0.733773 0.813848 892.0  
SR 0.687807 0.731213 0.649487 681.0  
macro avg 0.750099 0.761825 0.741562 2077.0  
micro avg 0.744198 0.744198 0.744198 2077.0  
weighted avg 0.742694 0.745022 0.744198 2077.0

The result of Model Number:Dataset Number:Featuregroup Number:Rescale of 0 : 0 : 4 : 1

f1-score precision recall support

AFIB 0.766199 0.770107 0.762355 875.0  
GSVT 0.776773 0.772732 0.780924 691.0  
SB 0.814179 0.813452 0.814914 1553.0  
SR 0.799187 0.799839 0.798570 907.0  
macro avg 0.789085 0.789032 0.789191 4026.0  
micro avg 0.793975 0.793975 0.793975 4026.0  
weighted avg 0.793954 0.793976 0.793975 4026.0

The result of Model Number:Dataset Number:Featuregroup Number:Rescale of 0 : 0 : 5 : 0

f1-score precision recall support

AFIB 0.757935 0.764213 0.853711 204.0  
GSVT 0.821930 0.786750 0.927329 300.0  
SB 0.750453 0.747845 0.753081 892.0  
SR 0.742991 0.743131 0.742855 681.0  
macro avg 0.768327 0.760485 0.819244 2077.0  
micro avg 0.784780 0.784780 0.784780 2077.0  
weighted avg 0.759065 0.753526 0.784780 2077.0

The result of Model Number:Dataset Number:Featuregroup Number:Rescale of 0 : 0 : 5 : 1

f1-score precision recall support

AFIB 0.699173 0.737496 0.665102 204.0  
GSVT 0.665761 0.689103 0.644031 300.0  
SB 0.684801 0.658389 0.713432 892.0  
SR 0.609492 0.626027 0.593842 681.0  
macro avg 0.664807 0.677754 0.654102 2077.0  
micro avg 0.659450 0.659450 0.659450 2077.0  
weighted avg 0.658770 0.659984 0.659450 2077.0

The result of Model Number:Dataset Number:Featuregroup Number:Rescale of 0 : 0 : 6 : 0

f1-score precision recall support

AFIB 0.736412 0.737889 0.734974 875.0  
GSVT 0.738236 0.734251 0.742285 691.0  
SB 0.771705 0.767582 0.775877 1553.0  
SR 0.753243 0.762175 0.744538 907.0  
macro avg 0.749899 0.750474 0.749419 4026.0  
micro avg 0.754162 0.754162 0.754162 4026.0  
weighted avg 0.754131 0.754190 0.754162 4026.0

The result of Model Number:Dataset Number:Featuregroup Number:Rescale of 0 : 0 : 6 : 1

f1-score precision recall support  
AFIB 0.811973 0.807427 0.816609 875.0  
GSVT 0.818585 0.823414 0.813862 691.0  
SB 0.862312 0.859613 0.865030 1553.0  
SR 0.845241 0.850832 0.839741 907.0  
macro avg 0.834528 0.835322 0.833811 4026.0  
micro avg 0.840027 0.840027 0.840027 4026.0  
weighted avg 0.840020 0.840080 0.840027 4026.0  
The result of Model Number:Dataset Number:Featuregroup Number:Rescale of 0 : 0 : 7 : 0

f1-score precision recall support  
AFIB 0.653119 0.656215 0.650056 875.0  
GSVT 0.661221 0.658102 0.664385 691.0  
SB 0.697434 0.695962 0.698916 1553.0  
SR 0.684218 0.686133 0.682328 907.0  
macro avg 0.673998 0.674103 0.673922 4026.0  
micro avg 0.678633 0.678633 0.678633 4026.0  
weighted avg 0.678610 0.678611 0.678633 4026.0  
The result of Model Number:Dataset Number:Featuregroup Number:Rescale of 0 : 0 : 7 : 1

f1-score precision recall support  
AFIB 0.781213 0.788418 0.774327 204.0  
GSVT 0.809773 0.809802 0.809766 300.0  
SB 0.826732 0.825264 0.828213 892.0  
SR 0.817958 0.817739 0.818197 681.0  
macro avg 0.808919 0.810306 0.807626 2077.0  
micro avg 0.816972 0.816972 0.816972 2077.0  
weighted avg 0.816935 0.816945 0.816972 2077.0  
The result of Model Number:Dataset Number:Featuregroup Number:Rescale of 0 : 0 : 8 : 0

f1-score precision recall support  
AFIB 0.753517 0.789593 0.720771 204.0  
GSVT 0.793656 0.785160 0.802368 300.0  
SB 0.810514 0.806037 0.815052 892.0  
SR 0.801358 0.800663 0.802068 681.0  
macro avg 0.789761 0.795363 0.785065 2077.0  
micro avg 0.799703 0.799703 0.799703 2077.0  
weighted avg 0.799479 0.799644 0.799703 2077.0  
The result of Model Number:Dataset Number:Featuregroup Number:Rescale of 0 : 0 : 8 : 1

f1-score precision recall support  
AFIB 0.665442 0.660112 0.670937 875.0  
GSVT 0.683820 0.684987 0.682737 691.0  
SB 0.724957 0.723014 0.726917 1553.0  
SR 0.705149 0.713358 0.697143 907.0  
macro avg 0.694842 0.695368 0.694433 4026.0  
micro avg 0.700460 0.700460 0.700460 4026.0

weighted avg 0.700499 0.700641 0.700460 4026.0

The result of Model Number:Dataset Number:Featuregroup Number:Rescale of 0 : 0 : 9 : 0

f1-score precision recall support

|              |          |          |          |        |
|--------------|----------|----------|----------|--------|
| AFIB         | 0.865130 | 0.869879 | 0.860489 | 875.0  |
| GSVT         | 0.866340 | 0.855387 | 0.877713 | 691.0  |
| SB           | 0.911107 | 0.907451 | 0.914800 | 1553.0 |
| SR           | 0.891548 | 0.902371 | 0.881037 | 907.0  |
| macro avg    | 0.883531 | 0.883772 | 0.883510 | 4026.0 |
| micro avg    | 0.889025 | 0.889025 | 0.889025 | 4026.0 |
| weighted avg | 0.889025 | 0.889205 | 0.889025 | 4026.0 |

The result of Model Number:Dataset Number:Featuregroup Number:Rescale of 0 : 0 : 9 : 1

f1-score precision recall support

|              |          |          |          |        |
|--------------|----------|----------|----------|--------|
| AFIB         | 0.720217 | 0.723787 | 0.716760 | 875.0  |
| GSVT         | 0.727389 | 0.728436 | 0.726454 | 691.0  |
| SB           | 0.765674 | 0.762122 | 0.769269 | 1553.0 |
| SR           | 0.751580 | 0.753462 | 0.749748 | 907.0  |
| macro avg    | 0.741215 | 0.741952 | 0.740558 | 4026.0 |
| micro avg    | 0.746110 | 0.746110 | 0.746110 | 4026.0 |
| weighted avg | 0.746048 | 0.746058 | 0.746110 | 4026.0 |

The result of Model Number:Dataset Number:Featuregroup Number:Rescale of 0 : 0 : 10 : 0

f1-score precision recall support

|              |          |          |          |        |
|--------------|----------|----------|----------|--------|
| AFIB         | 0.724372 | 0.725670 | 0.723102 | 875.0  |
| GSVT         | 0.693635 | 0.697278 | 0.690048 | 691.0  |
| SB           | 0.733697 | 0.693337 | 0.779054 | 1553.0 |
| SR           | 0.609339 | 0.685856 | 0.548235 | 907.0  |
| macro avg    | 0.690261 | 0.700535 | 0.685110 | 4026.0 |
| micro avg    | 0.699617 | 0.699617 | 0.699617 | 4026.0 |
| weighted avg | 0.696778 | 0.699355 | 0.699617 | 4026.0 |

The result of Model Number:Dataset Number:Featuregroup Number:Rescale of 0 : 0 : 10 : 1

f1-score precision recall support

|              |          |          |          |        |
|--------------|----------|----------|----------|--------|
| AFIB         | 0.717829 | 0.717957 | 0.717732 | 875.0  |
| GSVT         | 0.725423 | 0.727874 | 0.723035 | 691.0  |
| SB           | 0.762020 | 0.759392 | 0.764669 | 1553.0 |
| SR           | 0.747550 | 0.750071 | 0.745073 | 907.0  |
| macro avg    | 0.738205 | 0.738824 | 0.737627 | 4026.0 |
| micro avg    | 0.742907 | 0.742907 | 0.742907 | 4026.0 |
| weighted avg | 0.742874 | 0.742877 | 0.742907 | 4026.0 |

The result of Model Number:Dataset Number:Featuregroup Number:Rescale of 0 : 1 : 0 : 0

f1-score precision recall support

|      |          |          |          |       |
|------|----------|----------|----------|-------|
| AFIB | 0.904420 | 0.911289 | 0.897731 | 204.0 |
| GSVT | 0.922936 | 0.913922 | 0.932150 | 300.0 |

SB 0.944465 0.942050 0.946900 892.0  
SR 0.934446 0.939725 0.929238 681.0  
macro avg 0.926567 0.926747 0.926505 2077.0  
micro avg 0.934149 0.934149 0.934149 2077.0  
weighted avg 0.934137 0.934204 0.934149 2077.0

The result of Model Number:Dataset Number:Featuregroup Number:Rescale of 0 : 1 : 0 : 1

f1-score precision recall support

AFIB 0.886567 0.896419 0.877385 204.0  
GSVT 0.914030 0.908826 0.919558 300.0  
SB 0.932213 0.930964 0.933467 892.0  
SR 0.924283 0.925521 0.923060 681.0  
macro avg 0.914273 0.915432 0.913367 2077.0  
micro avg 0.922537 0.922537 0.922537 2077.0  
weighted avg 0.922503 0.922589 0.922537 2077.0

The result of Model Number:Dataset Number:Featuregroup Number:Rescale of 0 : 1 : 1 : 0

f1-score precision recall support

AFIB 0.860379 0.868702 0.852370 204.0  
GSVT 0.890824 0.889068 0.892602 300.0  
SB 0.909444 0.907833 0.911072 892.0  
SR 0.901060 0.901496 0.900662 681.0  
macro avg 0.890427 0.891775 0.889177 2077.0  
micro avg 0.899226 0.899226 0.899226 2077.0  
weighted avg 0.899186 0.899201 0.899226 2077.0

The result of Model Number:Dataset Number:Featuregroup Number:Rescale of 0 : 1 : 1 : 1

f1-score precision recall support

AFIB 0.796687 0.799667 0.794068 875.0  
GSVT 0.814620 0.822479 0.807073 691.0  
SB 0.866196 0.857110 0.875542 1553.0  
SR 0.836200 0.843560 0.829256 907.0  
macro avg 0.828426 0.830704 0.826485 4026.0  
micro avg 0.835655 0.835655 0.835655 4026.0  
weighted avg 0.835479 0.835629 0.835655 4026.0

The result of Model Number:Dataset Number:Featuregroup Number:Rescale of 0 : 1 : 2 : 0

f1-score precision recall support

AFIB 0.808786 0.863607 0.761047 204.0  
GSVT 0.762068 0.784678 0.741010 300.0  
SB 0.796551 0.758313 0.839304 892.0  
SR 0.706792 0.738881 0.678145 681.0  
macro avg 0.768549 0.786370 0.754877 2077.0  
micro avg 0.764580 0.764580 0.764580 2077.0  
weighted avg 0.763342 0.766092 0.764580 2077.0

The result of Model Number:Dataset Number:Featuregroup Number:Rescale of 0 : 1 : 2 : 1

f1-score precision recall support

AFIB 0.823767 0.813250 0.834608 875.0  
GSVT 0.838226 0.843033 0.833496 691.0  
SB 0.897269 0.893501 0.901078 1553.0  
SR 0.870849 0.884945 0.857211 907.0  
macro avg 0.857528 0.858682 0.856598 4026.0  
micro avg 0.865150 0.865150 0.865150 4026.0  
weighted avg 0.865208 0.865470 0.865150 4026.0

The result of Model Number:Dataset Number:Featuregroup Number:Rescale of 0 : 1 : 3 : 0

f1-score precision recall support

AFIB 0.677350 0.696022 0.659789 204.0  
GSVT 0.695376 0.682504 0.708810 300.0  
SB 0.706654 0.700048 0.713388 892.0  
SR 0.688892 0.698251 0.679792 681.0  
macro avg 0.692068 0.694206 0.690445 2077.0  
micro avg 0.696447 0.696447 0.696447 2077.0  
weighted avg 0.696323 0.696529 0.696447 2077.0

The result of Model Number:Dataset Number:Featuregroup Number:Rescale of 0 : 1 : 3 : 1

f1-score precision recall support

AFIB 0.876728 0.893618 0.860878 204.0  
GSVT 0.893191 0.878678 0.908354 300.0  
SB 0.908103 0.897273 0.919200 892.0  
SR 0.891210 0.907919 0.875120 681.0  
macro avg 0.892308 0.894372 0.890888 2077.0  
micro avg 0.897452 0.897452 0.897452 2077.0  
weighted avg 0.897329 0.897719 0.897452 2077.0

The result of Model Number:Dataset Number:Featuregroup Number:Rescale of 0 : 1 : 4 : 0

f1-score precision recall support

AFIB 0.694944 0.721949 0.669937 875.0  
GSVT 0.747087 0.741570 0.752786 691.0  
SB 0.820991 0.816762 0.825271 1553.0  
SR 0.772628 0.757894 0.788028 907.0  
macro avg 0.758913 0.759544 0.759006 4026.0  
micro avg 0.770680 0.770680 0.770680 4026.0  
weighted avg 0.770016 0.769988 0.770680 4026.0

The result of Model Number:Dataset Number:Featuregroup Number:Rescale of 0 : 1 : 4 : 1

f1-score precision recall support

AFIB 0.874717 0.864208 0.885517 875.0  
GSVT 0.891541 0.898759 0.884443 691.0  
SB 0.950313 0.946676 0.953983 1553.0  
SR 0.928032 0.939898 0.916473 907.0  
macro avg 0.911151 0.912385 0.910104 4026.0  
micro avg 0.918717 0.918717 0.918717 4026.0  
weighted avg 0.918776 0.919001 0.918717 4026.0

The result of Model Number:Dataset Number:Featuregroup Number:Rescale of 0 : 1 : 5 : 0

|              | f1-score | precision | recall   | support |
|--------------|----------|-----------|----------|---------|
| AFIB         | 0.762166 | 0.763639  | 0.760757 | 875.0   |
| GSVT         | 0.738411 | 0.735167  | 0.741727 | 691.0   |
| SB           | 0.771551 | 0.724656  | 0.824957 | 1553.0  |
| SR           | 0.620991 | 0.719547  | 0.546328 | 907.0   |
| macro avg    | 0.723280 | 0.735753  | 0.718442 | 4026.0  |
| micro avg    | 0.733948 | 0.733948  | 0.733948 | 4026.0  |
| weighted avg | 0.729904 | 0.733782  | 0.733948 | 4026.0  |

The result of Model Number:Dataset Number:Featuregroup Number:Rescale of 0 : 1 : 5 : 1

|              | f1-score | precision | recall   | support |
|--------------|----------|-----------|----------|---------|
| AFIB         | 0.633601 | 0.629611  | 0.713708 | 204.0   |
| GSVT         | 0.772370 | 0.768397  | 0.776514 | 300.0   |
| SB           | 0.794362 | 0.790582  | 0.798187 | 892.0   |
| SR           | 0.623087 | 0.625140  | 0.621424 | 681.0   |
| macro avg    | 0.705855 | 0.703433  | 0.727458 | 2077.0  |
| micro avg    | 0.728802 | 0.728802  | 0.728802 | 2077.0  |
| weighted avg | 0.719239 | 0.717323  | 0.728802 | 2077.0  |

The result of Model Number:Dataset Number:Featuregroup Number:Rescale of 0 : 1 : 6 : 0

|              | f1-score | precision | recall   | support |
|--------------|----------|-----------|----------|---------|
| AFIB         | 0.745517 | 0.766068  | 0.726188 | 204.0   |
| GSVT         | 0.765357 | 0.751189  | 0.780143 | 300.0   |
| SB           | 0.777770 | 0.770499  | 0.785181 | 892.0   |
| SR           | 0.758220 | 0.768521  | 0.748205 | 681.0   |
| macro avg    | 0.761716 | 0.764069  | 0.759929 | 2077.0  |
| micro avg    | 0.766535 | 0.766535  | 0.766535 | 2077.0  |
| weighted avg | 0.766399 | 0.766626  | 0.766535 | 2077.0  |

The result of Model Number:Dataset Number:Featuregroup Number:Rescale of 0 : 1 : 6 : 1

|              | f1-score | precision | recall   | support |
|--------------|----------|-----------|----------|---------|
| AFIB         | 0.615463 | 0.609429  | 0.658053 | 204.0   |
| GSVT         | 0.551857 | 0.545721  | 0.558270 | 300.0   |
| SB           | 0.709171 | 0.704007  | 0.714416 | 892.0   |
| SR           | 0.697277 | 0.702107  | 0.692571 | 681.0   |
| macro avg    | 0.643442 | 0.640316  | 0.655827 | 2077.0  |
| micro avg    | 0.679164 | 0.679164  | 0.679164 | 2077.0  |
| weighted avg | 0.673345 | 0.671232  | 0.679164 | 2077.0  |

The result of Model Number:Dataset Number:Featuregroup Number:Rescale of 0 : 1 : 7 : 0

|           | f1-score | precision | recall   | support |
|-----------|----------|-----------|----------|---------|
| AFIB      | 0.876948 | 0.864507  | 0.889774 | 875.0   |
| GSVT      | 0.894990 | 0.903713  | 0.886440 | 691.0   |
| SB        | 0.952444 | 0.949340  | 0.955570 | 1553.0  |
| SR        | 0.930201 | 0.942090  | 0.918619 | 907.0   |
| macro avg | 0.913646 | 0.914912  | 0.912601 | 4026.0  |

micro avg 0.921080 0.921080 0.921080 4026.0  
weighted avg 0.921164 0.921438 0.921080 4026.0  
The result of Model Number:Dataset Number:Featuregroup Number:Rescale of 0 : 1 : 7 : 1

|              | f1-score | precision | recall   | support |
|--------------|----------|-----------|----------|---------|
| AFIB         | 0.768573 | 0.802732  | 0.737309 | 204.0   |
| GSVT         | 0.800601 | 0.794316  | 0.807004 | 300.0   |
| SB           | 0.812830 | 0.806560  | 0.819206 | 892.0   |
| SR           | 0.803838 | 0.805165  | 0.802543 | 681.0   |
| macro avg    | 0.796460 | 0.802193  | 0.791516 | 2077.0  |
| micro avg    | 0.803937 | 0.803937  | 0.803937 | 2077.0  |
| weighted avg | 0.803769 | 0.803958  | 0.803937 | 2077.0  |

The result of Model Number:Dataset Number:Featuregroup Number:Rescale of 0 : 1 : 8 : 0

|              | f1-score | precision | recall   | support |
|--------------|----------|-----------|----------|---------|
| AFIB         | 0.717115 | 0.714199  | 0.720074 | 875.0   |
| GSVT         | 0.727597 | 0.731996  | 0.723280 | 691.0   |
| SB           | 0.767388 | 0.766454  | 0.768327 | 1553.0  |
| SR           | 0.751379 | 0.752570  | 0.750215 | 907.0   |
| macro avg    | 0.740870 | 0.741305  | 0.740474 | 4026.0  |
| micro avg    | 0.746028 | 0.746028  | 0.746028 | 4026.0  |
| weighted avg | 0.746026 | 0.746055  | 0.746028 | 4026.0  |

The result of Model Number:Dataset Number:Featuregroup Number:Rescale of 0 : 1 : 8 : 1

|              | f1-score | precision | recall   | support |
|--------------|----------|-----------|----------|---------|
| AFIB         | 0.754461 | 0.831088  | 0.691496 | 204.0   |
| GSVT         | 0.696741 | 0.744921  | 0.654740 | 300.0   |
| SB           | 0.758544 | 0.708763  | 0.815857 | 892.0   |
| SR           | 0.656532 | 0.691043  | 0.625484 | 681.0   |
| macro avg    | 0.716570 | 0.743954  | 0.696894 | 2077.0  |
| micro avg    | 0.717952 | 0.717952  | 0.717952 | 2077.0  |
| weighted avg | 0.715769 | 0.720190  | 0.717952 | 2077.0  |

The result of Model Number:Dataset Number:Featuregroup Number:Rescale of 0 : 1 : 9 : 0

|              | f1-score | precision | recall   | support |
|--------------|----------|-----------|----------|---------|
| AFIB         | 0.747587 | 0.761307  | 0.734712 | 204.0   |
| GSVT         | 0.775966 | 0.769727  | 0.782449 | 300.0   |
| SB           | 0.790361 | 0.788950  | 0.791778 | 892.0   |
| SR           | 0.782535 | 0.783231  | 0.781844 | 681.0   |
| macro avg    | 0.774112 | 0.775804  | 0.772696 | 2077.0  |
| micro avg    | 0.781569 | 0.781569  | 0.781569 | 2077.0  |
| weighted avg | 0.781514 | 0.781583  | 0.781569 | 2077.0  |

The result of Model Number:Dataset Number:Featuregroup Number:Rescale of 0 : 1 : 9 : 1

|      | f1-score | precision | recall   | support |
|------|----------|-----------|----------|---------|
| AFIB | 0.641515 | 0.633325  | 0.649958 | 875.0   |
| GSVT | 0.652776 | 0.656519  | 0.649092 | 691.0   |
| SB   | 0.698756 | 0.695821  | 0.701722 | 1553.0  |



SR 0.678181 0.689158 0.667561 907.0  
macro avg 0.667807 0.668706 0.667083 4026.0  
micro avg 0.673743 0.673743 0.673743 4026.0  
weighted avg 0.673788 0.673992 0.673743 4026.0  
The result of Model Number:Dataset Number:Featuregroup Number:Rescale of 0 : 1 : 10 :  
0

f1-score precision recall support  
AFIB 0.730661 0.738131 0.723401 875.0  
GSVT 0.730441 0.719156 0.742171 691.0  
SB 0.770518 0.765917 0.775181 1553.0  
SR 0.750123 0.760163 0.740367 907.0  
macro avg 0.745436 0.745842 0.745280 4026.0  
micro avg 0.750419 0.750419 0.750419 4026.0  
weighted avg 0.750382 0.750556 0.750419 4026.0  
The result of Model Number:Dataset Number:Featuregroup Number:Rescale of 0 : 1 : 10 :  
1

f1-score precision recall support  
AFIB 0.806582 0.816013 0.797522 204.0  
GSVT 0.828771 0.824960 0.832640 300.0  
SB 0.840505 0.837891 0.843141 892.0  
SR 0.833266 0.835628 0.830954 681.0  
macro avg 0.827281 0.828623 0.826064 2077.0  
micro avg 0.833148 0.833148 0.833148 2077.0  
weighted avg 0.833105 0.833133 0.833148 2077.0  
The result of Model Number:Dataset Number:Featuregroup Number:Rescale of 1 : 0 : 0 : 0

f1-score precision recall support  
AFIB 0.766628 0.766582 0.766723 875.0  
GSVT 0.768288 0.764134 0.772500 691.0  
SB 0.804992 0.799635 0.810431 1553.0  
SR 0.783616 0.796473 0.771197 907.0  
macro avg 0.780881 0.781706 0.780212 4026.0  
micro avg 0.785582 0.785582 0.785582 4026.0  
weighted avg 0.785539 0.785646 0.785582 4026.0  
The result of Model Number:Dataset Number:Featuregroup Number:Rescale of 1 : 0 : 0 : 1

f1-score precision recall support  
AFIB 0.740311 0.731417 0.749451 875.0  
GSVT 0.754550 0.760659 0.748543 691.0  
SB 0.804292 0.801213 0.807397 1553.0  
SR 0.785434 0.795477 0.775651 907.0  
macro avg 0.771147 0.772191 0.770261 4026.0  
micro avg 0.777550 0.777550 0.777550 4026.0  
weighted avg 0.777600 0.777791 0.777550 4026.0  
The result of Model Number:Dataset Number:Featuregroup Number:Rescale of 1 : 0 : 1 : 0

|              | f1-score | precision | recall   | support |
|--------------|----------|-----------|----------|---------|
| AFIB         | 0.491597 | 0.535519  | 0.519137 | 204.0   |
| GSVT         | 0.667725 | 0.656810  | 0.679240 | 300.0   |
| SB           | 0.568441 | 0.564111  | 0.572880 | 892.0   |
| SR           | 0.695110 | 0.687245  | 0.703178 | 681.0   |
| macro avg    | 0.605718 | 0.610921  | 0.618609 | 2077.0  |
| micro avg    | 0.625685 | 0.625685  | 0.625685 | 2077.0  |
| weighted avg | 0.616766 | 0.615065  | 0.625685 | 2077.0  |

The result of Model Number:Dataset Number:Featuregroup Number:Rescale of 1 : 0 : 1 : 1

|              | f1-score | precision | recall   | support |
|--------------|----------|-----------|----------|---------|
| AFIB         | 0.740280 | 0.760687  | 0.721087 | 204.0   |
| GSVT         | 0.759981 | 0.745913  | 0.774663 | 300.0   |
| SB           | 0.772306 | 0.765086  | 0.779666 | 892.0   |
| SR           | 0.752894 | 0.763123  | 0.742949 | 681.0   |
| macro avg    | 0.756365 | 0.758702  | 0.754591 | 2077.0  |
| micro avg    | 0.761151 | 0.761151  | 0.761151 | 2077.0  |
| weighted avg | 0.761016 | 0.761241  | 0.761151 | 2077.0  |

The result of Model Number:Dataset Number:Featuregroup Number:Rescale of 1 : 0 : 2 : 0

|              | f1-score | precision | recall   | support |
|--------------|----------|-----------|----------|---------|
| AFIB         | 0.709568 | 0.693444  | 0.726510 | 875.0   |
| GSVT         | 0.733886 | 0.745787  | 0.722419 | 691.0   |
| SB           | 0.782976 | 0.782981  | 0.782976 | 1553.0  |
| SR           | 0.762937 | 0.771628  | 0.754440 | 907.0   |
| macro avg    | 0.747342 | 0.748460  | 0.746586 | 4026.0  |
| micro avg    | 0.753882 | 0.753882  | 0.753882 | 4026.0  |
| weighted avg | 0.754082 | 0.754580  | 0.753882 | 4026.0  |

The result of Model Number:Dataset Number:Featuregroup Number:Rescale of 1 : 0 : 2 : 1

|              | f1-score | precision | recall   | support |
|--------------|----------|-----------|----------|---------|
| AFIB         | 0.855194 | 0.913585  | 0.804183 | 204.0   |
| GSVT         | 0.904025 | 0.885603  | 0.923308 | 300.0   |
| SB           | 0.926448 | 0.918325  | 0.934749 | 892.0   |
| SR           | 0.903595 | 0.906604  | 0.900686 | 681.0   |
| macro avg    | 0.897315 | 0.906029  | 0.890732 | 2077.0  |
| micro avg    | 0.909104 | 0.909104  | 0.909104 | 2077.0  |
| weighted avg | 0.908718 | 0.909290  | 0.909104 | 2077.0  |

The result of Model Number:Dataset Number:Featuregroup Number:Rescale of 1 : 0 : 3 : 0

|           | f1-score | precision | recall   | support |
|-----------|----------|-----------|----------|---------|
| AFIB      | 0.851745 | 0.854489  | 0.849098 | 875.0   |
| GSVT      | 0.863720 | 0.850007  | 0.877960 | 691.0   |
| SB        | 0.910069 | 0.902470  | 0.917803 | 1553.0  |
| SR        | 0.864323 | 0.886274  | 0.843464 | 907.0   |
| macro avg | 0.872464 | 0.873310  | 0.872081 | 4026.0  |
| micro avg | 0.879285 | 0.879285  | 0.879285 | 4026.0  |

weighted avg 0.879132 0.879389 0.879285 4026.0

The result of Model Number:Dataset Number:Featuregroup Number:Rescale of 1 : 0 : 3 : 1

f1-score precision recall support

|              |          |          |          |        |
|--------------|----------|----------|----------|--------|
| AFIB         | 0.652554 | 0.651825 | 0.653304 | 875.0  |
| GSVT         | 0.664490 | 0.656179 | 0.673034 | 691.0  |
| SB           | 0.698043 | 0.692431 | 0.703752 | 1553.0 |
| SR           | 0.666900 | 0.684398 | 0.650285 | 907.0  |
| macro avg    | 0.670497 | 0.671208 | 0.670094 | 4026.0 |
| micro avg    | 0.675470 | 0.675470 | 0.675470 | 4026.0 |
| weighted avg | 0.675382 | 0.675574 | 0.675470 | 4026.0 |

The result of Model Number:Dataset Number:Featuregroup Number:Rescale of 1 : 0 : 4 : 0

f1-score precision recall support

|              |          |          |          |        |
|--------------|----------|----------|----------|--------|
| AFIB         | 0.762221 | 0.768263 | 0.756293 | 875.0  |
| GSVT         | 0.771885 | 0.768482 | 0.775344 | 691.0  |
| SB           | 0.820808 | 0.817564 | 0.824085 | 1553.0 |
| SR           | 0.800638 | 0.802901 | 0.798428 | 907.0  |
| macro avg    | 0.788888 | 0.789302 | 0.788537 | 4026.0 |
| micro avg    | 0.795205 | 0.795205 | 0.795205 | 4026.0 |
| weighted avg | 0.795134 | 0.795121 | 0.795205 | 4026.0 |

The result of Model Number:Dataset Number:Featuregroup Number:Rescale of 1 : 0 : 4 : 1

f1-score precision recall support

|              |          |          |          |        |
|--------------|----------|----------|----------|--------|
| AFIB         | 0.757406 | 0.748431 | 0.766663 | 875.0  |
| GSVT         | 0.768187 | 0.775613 | 0.760976 | 691.0  |
| SB           | 0.815302 | 0.812183 | 0.818452 | 1553.0 |
| SR           | 0.796294 | 0.805481 | 0.787337 | 907.0  |
| macro avg    | 0.784297 | 0.785427 | 0.783357 | 4026.0 |
| micro avg    | 0.790322 | 0.790322 | 0.790322 | 4026.0 |
| weighted avg | 0.790350 | 0.790541 | 0.790322 | 4026.0 |

The result of Model Number:Dataset Number:Featuregroup Number:Rescale of 1 : 0 : 5 : 0

f1-score precision recall support

|              |          |          |          |        |
|--------------|----------|----------|----------|--------|
| AFIB         | 0.890368 | 0.877736 | 0.903390 | 875.0  |
| GSVT         | 0.908686 | 0.917542 | 0.900005 | 691.0  |
| SB           | 0.967019 | 0.963867 | 0.970193 | 1553.0 |
| SR           | 0.944436 | 0.956507 | 0.932676 | 907.0  |
| macro avg    | 0.927627 | 0.928913 | 0.926566 | 4026.0 |
| micro avg    | 0.935175 | 0.935175 | 0.935175 | 4026.0 |
| weighted avg | 0.935260 | 0.935539 | 0.935175 | 4026.0 |

The result of Model Number:Dataset Number:Featuregroup Number:Rescale of 1 : 0 : 5 : 1

f1-score precision recall support

|      |          |          |          |        |
|------|----------|----------|----------|--------|
| AFIB | 0.717773 | 0.734677 | 0.701691 | 875.0  |
| GSVT | 0.756639 | 0.758550 | 0.754788 | 691.0  |
| SB   | 0.822859 | 0.819448 | 0.826302 | 1553.0 |
| SR   | 0.782955 | 0.770625 | 0.795724 | 907.0  |

macro avg 0.770057 0.770825 0.769626 4026.0  
micro avg 0.780056 0.780056 0.780056 4026.0  
weighted avg 0.779665 0.779573 0.780056 4026.0

The result of Model Number:Dataset Number:Featuregroup Number:Rescale of 1 : 0 : 6 : 0

f1-score precision recall support

AFIB 0.740109 0.739873 0.740385 875.0  
GSVT 0.751139 0.741484 0.761137 691.0  
SB 0.794510 0.792782 0.796249 1553.0  
SR 0.772527 0.783852 0.761538 907.0  
macro avg 0.764571 0.764497 0.764827 4026.0  
micro avg 0.770261 0.770261 0.770261 4026.0  
weighted avg 0.770290 0.770466 0.770261 4026.0

The result of Model Number:Dataset Number:Featuregroup Number:Rescale of 1 : 0 : 6 : 1

f1-score precision recall support

AFIB 0.689385 0.687393 0.691453 875.0  
GSVT 0.702163 0.701591 0.702783 691.0  
SB 0.745799 0.742710 0.748919 1553.0  
SR 0.723409 0.731356 0.715671 907.0  
macro avg 0.715189 0.715762 0.714707 4026.0  
micro avg 0.721021 0.721021 0.721021 4026.0  
weighted avg 0.721004 0.721072 0.721021 4026.0

The result of Model Number:Dataset Number:Featuregroup Number:Rescale of 1 : 0 : 7 : 0

f1-score precision recall support

AFIB 0.557952 0.518853 0.655209 875.0  
GSVT 0.478516 0.446761 0.541249 691.0  
SB 0.571796 0.566971 0.576716 1553.0  
SR 0.551128 0.564487 0.538579 907.0  
macro avg 0.539848 0.524268 0.577938 4026.0  
micro avg 0.579096 0.579096 0.579096 4026.0  
weighted avg 0.548121 0.535322 0.579096 4026.0

The result of Model Number:Dataset Number:Featuregroup Number:Rescale of 1 : 0 : 7 : 1

f1-score precision recall support

AFIB 0.734596 0.755269 0.715175 204.0  
GSVT 0.753588 0.748298 0.759095 300.0  
SB 0.774311 0.771213 0.777436 892.0  
SR 0.764019 0.764497 0.763565 681.0  
macro avg 0.756628 0.759819 0.753818 2077.0  
micro avg 0.764123 0.764123 0.764123 2077.0  
weighted avg 0.764043 0.764135 0.764123 2077.0

The result of Model Number:Dataset Number:Featuregroup Number:Rescale of 1 : 0 : 8 : 0

f1-score precision recall support

AFIB 0.705692 0.727427 0.685360 204.0  
GSVT 0.723696 0.714836 0.732856 300.0

SB 0.743352 0.738935 0.747847 892.0  
SR 0.730822 0.734427 0.727282 681.0  
macro avg 0.725891 0.728907 0.723336 2077.0  
micro avg 0.732801 0.732801 0.732801 2077.0  
weighted avg 0.732706 0.732846 0.732801 2077.0

The result of Model Number:Dataset Number:Featuregroup Number:Rescale of 1 : 0 : 8 : 1

f1-score precision recall support

AFIB 0.608351 0.599191 0.622861 875.0  
GSVT 0.580865 0.579175 0.585820 691.0  
SB 0.620289 0.578011 0.674399 1553.0  
SR 0.459487 0.614198 0.380740 907.0  
macro avg 0.567248 0.592643 0.565955 4026.0  
micro avg 0.581838 0.581838 0.581838 4026.0  
weighted avg 0.574702 0.590966 0.581838 4026.0

The result of Model Number:Dataset Number:Featuregroup Number:Rescale of 1 : 0 : 9 : 0

f1-score precision recall support

AFIB 0.788350 0.798880 0.778316 204.0  
GSVT 0.802277 0.797389 0.807347 300.0  
SB 0.821616 0.820887 0.822351 892.0  
SR 0.815545 0.815668 0.815426 681.0  
macro avg 0.806947 0.808206 0.805860 2077.0  
micro avg 0.813588 0.813588 0.813588 2077.0  
weighted avg 0.813564 0.813621 0.813588 2077.0

The result of Model Number:Dataset Number:Featuregroup Number:Rescale of 1 : 0 : 9 : 1

f1-score precision recall support

AFIB 0.685935 0.707531 0.665786 204.0  
GSVT 0.651675 0.665594 0.638434 300.0  
SB 0.672868 0.649323 0.698210 892.0  
SR 0.614499 0.635267 0.595090 681.0  
macro avg 0.656244 0.664429 0.649380 2077.0  
micro avg 0.652581 0.652581 0.652581 2077.0  
weighted avg 0.651953 0.652782 0.652581 2077.0

The result of Model Number:Dataset Number:Featuregroup Number:Rescale of 1 : 0 : 10 : 0

f1-score precision recall support

AFIB 0.725040 0.762497 0.691305 204.0  
GSVT 0.760266 0.752834 0.767862 300.0  
SB 0.773671 0.767447 0.780001 892.0  
SR 0.764115 0.765045 0.763218 681.0  
macro avg 0.755773 0.761956 0.750597 2077.0  
micro avg 0.764033 0.764033 0.764033 2077.0  
weighted avg 0.763825 0.764063 0.764033 2077.0

The result of Model Number:Dataset Number:Featuregroup Number:Rescale of 1 : 0 : 10 : 1

|              | f1-score | precision | recall   | support |
|--------------|----------|-----------|----------|---------|
| AFIB         | 0.702520 | 0.691749  | 0.713750 | 875.0   |
| GSVT         | 0.726744 | 0.733868  | 0.719901 | 691.0   |
| SB           | 0.773450 | 0.771643  | 0.775290 | 1553.0  |
| SR           | 0.754129 | 0.763691  | 0.744820 | 907.0   |
| macro avg    | 0.739211 | 0.740238  | 0.738440 | 4026.0  |
| micro avg    | 0.745544 | 0.745544  | 0.745544 | 4026.0  |
| weighted avg | 0.745665 | 0.746004  | 0.745544 | 4026.0  |

The result of Model Number:Dataset Number:Featuregroup Number:Rescale of 1 : 1 : 0 : 0

|              | f1-score | precision | recall   | support |
|--------------|----------|-----------|----------|---------|
| AFIB         | 0.656168 | 0.650016  | 0.662520 | 875.0   |
| GSVT         | 0.622110 | 0.607157  | 0.667842 | 691.0   |
| SB           | 0.719354 | 0.716712  | 0.722035 | 1553.0  |
| SR           | 0.559500 | 0.563424  | 0.555639 | 907.0   |
| macro avg    | 0.639283 | 0.634327  | 0.652009 | 4026.0  |
| micro avg    | 0.662312 | 0.662312  | 0.662312 | 4026.0  |
| weighted avg | 0.652918 | 0.648880  | 0.662312 | 4026.0  |

The result of Model Number:Dataset Number:Featuregroup Number:Rescale of 1 : 1 : 0 : 1

|              | f1-score | precision | recall   | support |
|--------------|----------|-----------|----------|---------|
| AFIB         | 0.863396 | 0.925802  | 0.809466 | 204.0   |
| GSVT         | 0.817815 | 0.822239  | 0.813773 | 300.0   |
| SB           | 0.854224 | 0.803002  | 0.912446 | 892.0   |
| SR           | 0.750073 | 0.809497  | 0.698872 | 681.0   |
| macro avg    | 0.821377 | 0.840135  | 0.808639 | 2077.0  |
| micro avg    | 0.818053 | 0.818053  | 0.818053 | 2077.0  |
| weighted avg | 0.815717 | 0.819971  | 0.818053 | 2077.0  |

The result of Model Number:Dataset Number:Featuregroup Number:Rescale of 1 : 1 : 1 : 0

|              | f1-score | precision | recall   | support |
|--------------|----------|-----------|----------|---------|
| AFIB         | 0.680768 | 0.687728  | 0.674004 | 875.0   |
| GSVT         | 0.680563 | 0.670049  | 0.691492 | 691.0   |
| SB           | 0.717903 | 0.713616  | 0.722248 | 1553.0  |
| SR           | 0.698901 | 0.708256  | 0.689812 | 907.0   |
| macro avg    | 0.694534 | 0.694912  | 0.694389 | 4026.0  |
| micro avg    | 0.699176 | 0.699176  | 0.699176 | 4026.0  |
| weighted avg | 0.699143 | 0.699305  | 0.699176 | 4026.0  |

The result of Model Number:Dataset Number:Featuregroup Number:Rescale of 1 : 1 : 1 : 1

|      | f1-score | precision | recall   | support |
|------|----------|-----------|----------|---------|
| AFIB | 0.710041 | 0.699428  | 0.721007 | 875.0   |
| GSVT | 0.723654 | 0.729843  | 0.717581 | 691.0   |
| SB   | 0.773208 | 0.770546  | 0.775894 | 1553.0  |
| SR   | 0.750577 | 0.761771  | 0.739732 | 907.0   |

macro avg 0.739370 0.740397 0.738553 4026.0  
micro avg 0.745810 0.745810 0.745810 4026.0  
weighted avg 0.745876 0.746126 0.745810 4026.0

The result of Model Number:Dataset Number:Featuregroup Number:Rescale of 1 : 1 : 2 : 0

f1-score precision recall support

AFIB 0.798865 0.824816 0.774649 204.0  
GSVT 0.814010 0.806723 0.821591 300.0  
SB 0.833366 0.827654 0.839158 892.0  
SR 0.819775 0.823233 0.816393 681.0  
macro avg 0.816504 0.820607 0.812948 2077.0  
micro avg 0.822821 0.822821 0.822821 2077.0  
weighted avg 0.822725 0.822903 0.822821 2077.0

The result of Model Number:Dataset Number:Featuregroup Number:Rescale of 1 : 1 : 2 : 1

f1-score precision recall support

AFIB 0.820245 0.803905 0.837305 875.0  
GSVT 0.667607 0.620839 0.836826 691.0  
SB 0.541689 0.542622 0.540759 1553.0  
SR 0.878147 0.885880 0.870585 907.0  
macro avg 0.726922 0.713311 0.771369 4026.0  
micro avg 0.730330 0.730330 0.730330 4026.0  
weighted avg 0.699641 0.690164 0.730330 4026.0

The result of Model Number:Dataset Number:Featuregroup Number:Rescale of 1 : 1 : 3 : 0

f1-score precision recall support

AFIB 0.683574 0.708917 0.660077 204.0  
GSVT 0.704053 0.695250 0.713171 300.0  
SB 0.721906 0.715319 0.728622 892.0  
SR 0.702927 0.708382 0.697562 681.0  
macro avg 0.703115 0.706967 0.699858 2077.0  
micro avg 0.709474 0.709474 0.709474 2077.0  
weighted avg 0.709340 0.709517 0.709474 2077.0

The result of Model Number:Dataset Number:Featuregroup Number:Rescale of 1 : 1 : 3 : 1

f1-score precision recall support

AFIB 0.899933 0.908137 0.891994 204.0  
GSVT 0.923419 0.920395 0.926491 300.0  
SB 0.940299 0.939672 0.940930 892.0  
SR 0.932030 0.931762 0.932311 681.0  
macro avg 0.923920 0.924992 0.922932 2077.0  
micro avg 0.931212 0.931212 0.931212 2077.0  
weighted avg 0.931185 0.931197 0.931212 2077.0

The result of Model Number:Dataset Number:Featuregroup Number:Rescale of 1 : 1 : 4 : 0

f1-score precision recall support

AFIB 0.826507 0.835317 0.818016 204.0  
GSVT 0.841707 0.837089 0.846469 300.0

SB 0.861136 0.859701 0.862582 892.0  
SR 0.853958 0.855349 0.852582 681.0  
macro avg 0.845827 0.846864 0.844912 2077.0  
micro avg 0.852598 0.852598 0.852598 2077.0  
weighted avg 0.852575 0.852613 0.852598 2077.0

The result of Model Number:Dataset Number:Featuregroup Number:Rescale of 1 : 1 : 4 : 1

f1-score precision recall support

AFIB 0.772367 0.790013 0.755689 204.0  
GSVT 0.807455 0.802429 0.812565 300.0  
SB 0.824894 0.822335 0.827480 892.0  
SR 0.815447 0.815824 0.815092 681.0  
macro avg 0.805041 0.807650 0.802706 2077.0  
micro avg 0.814212 0.814212 0.814212 2077.0  
weighted avg 0.814118 0.814150 0.814212 2077.0

The result of Model Number:Dataset Number:Featuregroup Number:Rescale of 1 : 1 : 5 : 0

f1-score precision recall support

AFIB 0.663139 0.644034 0.727592 875.0  
GSVT 0.730869 0.728534 0.733312 691.0  
SB 0.616961 0.607869 0.626379 1553.0  
SR 0.738737 0.753156 0.724952 907.0  
macro avg 0.687427 0.683398 0.703059 4026.0  
micro avg 0.688937 0.688937 0.688937 4026.0  
weighted avg 0.673982 0.669170 0.688937 4026.0

The result of Model Number:Dataset Number:Featuregroup Number:Rescale of 1 : 1 : 5 : 1

f1-score precision recall support

AFIB 0.659641 0.655183 0.664250 875.0  
GSVT 0.675734 0.676003 0.675552 691.0  
SB 0.717830 0.715998 0.719678 1553.0  
SR 0.698284 0.706086 0.690662 907.0  
macro avg 0.687872 0.688317 0.687536 4026.0  
micro avg 0.693521 0.693521 0.693521 4026.0  
weighted avg 0.693555 0.693683 0.693521 4026.0

The result of Model Number:Dataset Number:Featuregroup Number:Rescale of 1 : 1 : 6 : 0

f1-score precision recall support

AFIB 0.769671 0.768426 0.770989 875.0  
GSVT 0.776723 0.779812 0.773698 691.0  
SB 0.815695 0.812730 0.818688 1553.0  
SR 0.802353 0.806412 0.798379 907.0  
macro avg 0.791111 0.791845 0.790438 4026.0  
micro avg 0.796024 0.796024 0.796024 4026.0  
weighted avg 0.795998 0.796028 0.796024 4026.0

The result of Model Number:Dataset Number:Featuregroup Number:Rescale of 1 : 1 : 6 : 1

f1-score precision recall support



AFIB 0.760388 0.760342 0.760481 875.0  
GSVT 0.762034 0.757914 0.766212 691.0  
SB 0.798439 0.793126 0.803833 1553.0  
SR 0.777237 0.789990 0.764919 907.0  
macro avg 0.774524 0.775343 0.773861 4026.0  
micro avg 0.779187 0.779187 0.779187 4026.0  
weighted avg 0.779144 0.779251 0.779187 4026.0

The result of Model Number:Dataset Number:Featuregroup Number:Rescale of 1 : 1 : 7 : 0

f1-score precision recall support

AFIB 0.874779 0.914280 0.838835 204.0  
GSVT 0.905204 0.895038 0.915769 300.0  
SB 0.870773 0.832809 0.931740 892.0  
SR 0.725473 0.731659 0.719515 681.0  
macro avg 0.844057 0.843447 0.851464 2077.0  
micro avg 0.850724 0.850724 0.850724 2077.0  
weighted avg 0.828499 0.816635 0.850724 2077.0

The result of Model Number:Dataset Number:Featuregroup Number:Rescale of 1 : 1 : 7 : 1

f1-score precision recall support

AFIB 0.856632 0.855246 0.858099 875.0  
GSVT 0.864481 0.867919 0.861114 691.0  
SB 0.907856 0.904556 0.911187 1553.0  
SR 0.893006 0.897524 0.888583 907.0  
macro avg 0.880494 0.881311 0.879746 4026.0  
micro avg 0.885962 0.885962 0.885962 4026.0  
weighted avg 0.885933 0.885966 0.885962 4026.0

The result of Model Number:Dataset Number:Featuregroup Number:Rescale of 1 : 1 : 8 : 0

f1-score precision recall support

AFIB 0.852160 0.910345 0.801330 204.0  
GSVT 0.900818 0.882462 0.920034 300.0  
SB 0.923162 0.915068 0.931434 892.0  
SR 0.900390 0.903389 0.897492 681.0  
macro avg 0.894133 0.902816 0.887572 2077.0  
micro avg 0.905880 0.905880 0.905880 2077.0  
weighted avg 0.905495 0.906065 0.905880 2077.0

The result of Model Number:Dataset Number:Featuregroup Number:Rescale of 1 : 1 : 8 : 1

f1-score precision recall support

AFIB 0.915973 0.929860 0.902517 204.0  
GSVT 0.930701 0.922855 0.938730 300.0  
SB 0.951346 0.948277 0.954437 892.0  
SR 0.941133 0.944629 0.937689 681.0  
macro avg 0.934788 0.936405 0.933343 2077.0  
micro avg 0.941578 0.941578 0.941578 2077.0  
weighted avg 0.941541 0.941600 0.941578 2077.0

The result of Model Number:Dataset Number:Featuregroup Number:Rescale of 1 : 1 : 9 : 0

|              | f1-score | precision | recall   | support |
|--------------|----------|-----------|----------|---------|
| AFIB         | 0.812290 | 0.808222  | 0.816666 | 875.0   |
| GSVT         | 0.830643 | 0.831766  | 0.829690 | 691.0   |
| SB           | 0.884521 | 0.881608  | 0.887477 | 1553.0  |
| SR           | 0.858545 | 0.867455  | 0.849917 | 907.0   |
| macro avg    | 0.846500 | 0.847263  | 0.845937 | 4026.0  |
| micro avg    | 0.853707 | 0.853707  | 0.853707 | 4026.0  |
| weighted avg | 0.853723 | 0.853916  | 0.853707 | 4026.0  |

The result of Model Number:Dataset Number:Featuregroup Number:Rescale of 1 : 1 : 9 : 1

|              | f1-score | precision | recall   | support |
|--------------|----------|-----------|----------|---------|
| AFIB         | 0.806559 | 0.812875  | 0.800382 | 875.0   |
| GSVT         | 0.808686 | 0.798365  | 0.819327 | 691.0   |
| SB           | 0.848220 | 0.844818  | 0.851659 | 1553.0  |
| SR           | 0.830300 | 0.838450  | 0.822337 | 907.0   |
| macro avg    | 0.823441 | 0.823627  | 0.823426 | 4026.0  |
| micro avg    | 0.828359 | 0.828359  | 0.828359 | 4026.0  |
| weighted avg | 0.828343 | 0.828468  | 0.828359 | 4026.0  |

The result of Model Number:Dataset Number:Featuregroup Number:Rescale of 1 : 1 : 10 : 0

|              | f1-score | precision | recall   | support |
|--------------|----------|-----------|----------|---------|
| AFIB         | 0.848384 | 0.847011  | 0.849836 | 875.0   |
| GSVT         | 0.856157 | 0.859562  | 0.852823 | 691.0   |
| SB           | 0.899114 | 0.895846  | 0.902413 | 1553.0  |
| SR           | 0.884407 | 0.888882  | 0.880027 | 907.0   |
| macro avg    | 0.872016 | 0.872825  | 0.871275 | 4026.0  |
| micro avg    | 0.877432 | 0.877432  | 0.877432 | 4026.0  |
| weighted avg | 0.877402 | 0.877436  | 0.877432 | 4026.0  |

The result of Model Number:Dataset Number:Featuregroup Number:Rescale of 1 : 1 : 10 : 1

|              | f1-score | precision | recall   | support |
|--------------|----------|-----------|----------|---------|
| AFIB         | 0.919340 | 0.927686  | 0.911614 | 204.0   |
| GSVT         | 0.949725 | 0.943985  | 0.955783 | 300.0   |
| SB           | 0.969594 | 0.968294  | 0.970898 | 892.0   |
| SR           | 0.960622 | 0.962614  | 0.958645 | 681.0   |
| macro avg    | 0.949820 | 0.950645  | 0.949235 | 2077.0  |
| micro avg    | 0.958875 | 0.958875  | 0.958875 | 2077.0  |
| weighted avg | 0.958846 | 0.958932  | 0.958875 | 2077.0  |

The result of Model Number:Dataset Number:Featuregroup Number:Rescale of 2 : 0 : 0 : 0

|      | f1-score | precision | recall   | support |
|------|----------|-----------|----------|---------|
| AFIB | 0.838020 | 0.834753  | 0.841374 | 875.0   |
| GSVT | 0.853704 | 0.855504  | 0.851962 | 691.0   |
| SB   | 0.906236 | 0.903977  | 0.908511 | 1553.0  |

SR 0.885331 0.891277 0.879482 907.0  
macro avg 0.870823 0.871378 0.870332 4026.0  
micro avg 0.877674 0.877674 0.877674 4026.0  
weighted avg 0.877684 0.877751 0.877674 4026.0

The result of Model Number:Dataset Number:Featuregroup Number:Rescale of 2 : 0 : 0 : 1

f1-score precision recall support  
AFIB 0.802323 0.806532 0.798206 875.0  
GSVT 0.819099 0.817628 0.820635 691.0  
SB 0.889402 0.882581 0.896331 1553.0  
SR 0.858023 0.866611 0.849608 907.0  
macro avg 0.842212 0.843338 0.841195 4026.0  
micro avg 0.851487 0.851487 0.851487 4026.0  
weighted avg 0.851341 0.851307 0.851487 4026.0

The result of Model Number:Dataset Number:Featuregroup Number:Rescale of 2 : 0 : 1 : 0

f1-score precision recall support  
AFIB 0.795311 0.787940 0.802866 875.0  
GSVT 0.809594 0.813991 0.805258 691.0  
SB 0.857811 0.855834 0.859799 1553.0  
SR 0.837825 0.845557 0.830260 907.0  
macro avg 0.825135 0.825830 0.824546 4026.0  
micro avg 0.831409 0.831409 0.831409 4026.0  
weighted avg 0.831449 0.831581 0.831409 4026.0

The result of Model Number:Dataset Number:Featuregroup Number:Rescale of 2 : 0 : 1 : 1

f1-score precision recall support  
AFIB 0.791446 0.826621 0.759252 204.0  
GSVT 0.824427 0.817955 0.831021 300.0  
SB 0.837021 0.830564 0.843586 892.0  
SR 0.827760 0.829127 0.826427 681.0  
macro avg 0.820163 0.826067 0.815072 2077.0  
micro avg 0.827862 0.827862 0.827862 2077.0  
weighted avg 0.827689 0.827884 0.827862 2077.0

The result of Model Number:Dataset Number:Featuregroup Number:Rescale of 2 : 0 : 2 : 0

f1-score precision recall support  
AFIB 0.899976 0.927695 0.874045 204.0  
GSVT 0.922935 0.911637 0.934618 300.0  
SB 0.948004 0.942371 0.953736 892.0  
SR 0.932024 0.936621 0.927509 681.0  
macro avg 0.925735 0.929581 0.922477 2077.0  
micro avg 0.934548 0.934548 0.934548 2077.0  
weighted avg 0.934426 0.934605 0.934548 2077.0

The result of Model Number:Dataset Number:Featuregroup Number:Rescale of 2 : 0 : 2 : 1

f1-score precision recall support  
AFIB 0.716157 0.730459 0.702514 204.0

GSVT 0.724200 0.715151 0.733590 300.0  
SB 0.738026 0.730969 0.745222 892.0  
SR 0.724623 0.734129 0.715380 681.0  
macro avg 0.725752 0.727677 0.724177 2077.0  
micro avg 0.729563 0.729563 0.729563 2077.0  
weighted avg 0.729487 0.729670 0.729563 2077.0

The result of Model Number:Dataset Number:Featuregroup Number:Rescale of 2 : 0 : 3 : 0

f1-score precision recall support

AFIB 0.798023 0.818575 0.778510 204.0  
GSVT 0.732326 0.699727 0.826429 300.0  
SB 0.840189 0.838223 0.842166 892.0  
SR 0.666538 0.666663 0.666421 681.0  
macro avg 0.759269 0.755797 0.778381 2077.0  
micro avg 0.776018 0.776018 0.776018 2077.0  
weighted avg 0.763531 0.760038 0.776018 2077.0

The result of Model Number:Dataset Number:Featuregroup Number:Rescale of 2 : 0 : 3 : 1

f1-score precision recall support

AFIB 0.733636 0.750397 0.717794 204.0  
GSVT 0.766964 0.762190 0.771818 300.0  
SB 0.783529 0.781098 0.785985 892.0  
SR 0.774555 0.774914 0.774218 681.0  
macro avg 0.764671 0.767150 0.762454 2077.0  
micro avg 0.773383 0.773383 0.773383 2077.0  
weighted avg 0.773294 0.773324 0.773383 2077.0

The result of Model Number:Dataset Number:Featuregroup Number:Rescale of 2 : 0 : 4 : 0

f1-score precision recall support

AFIB 0.742222 0.735071 0.749627 875.0  
GSVT 0.761668 0.763847 0.759581 691.0  
SB 0.809784 0.807922 0.811661 1553.0  
SR 0.787005 0.796265 0.777974 907.0  
macro avg 0.775170 0.775776 0.774711 4026.0  
micro avg 0.781651 0.781651 0.781651 4026.0  
weighted avg 0.781710 0.781898 0.781651 4026.0

The result of Model Number:Dataset Number:Featuregroup Number:Rescale of 2 : 0 : 4 : 1

f1-score precision recall support

AFIB 0.803652 0.821529 0.786709 204.0  
GSVT 0.837892 0.832685 0.843197 300.0  
SB 0.856081 0.854278 0.857902 892.0  
SR 0.846963 0.846364 0.847589 681.0  
macro avg 0.836147 0.838714 0.833849 2077.0  
micro avg 0.845404 0.845404 0.845404 2077.0  
weighted avg 0.845315 0.845348 0.845404 2077.0

The result of Model Number:Dataset Number:Featuregroup Number:Rescale of 2 : 0 : 5 : 0

f1-score precision recall support  
AFIB 0.765185 0.772614 0.758372 204.0  
GSVT 0.788122 0.784397 0.792092 300.0  
SB 0.804082 0.803185 0.804983 892.0  
SR 0.797007 0.797832 0.796188 681.0  
macro avg 0.788599 0.789507 0.787909 2077.0  
micro avg 0.795659 0.795659 0.795659 2077.0  
weighted avg 0.795637 0.795714 0.795659 2077.0

The result of Model Number:Dataset Number:Featuregroup Number:Rescale of 2 : 0 : 5 : 1

f1-score precision recall support  
AFIB 0.775442 0.774187 0.776770 875.0  
GSVT 0.782547 0.785659 0.779500 691.0  
SB 0.821811 0.818824 0.824826 1553.0  
SR 0.808369 0.812458 0.804365 907.0  
macro avg 0.797042 0.797782 0.796365 4026.0  
micro avg 0.801993 0.801993 0.801993 4026.0  
weighted avg 0.801966 0.801996 0.801993 4026.0

The result of Model Number:Dataset Number:Featuregroup Number:Rescale of 2 : 0 : 6 : 0

f1-score precision recall support  
AFIB 0.863709 0.855388 0.872327 875.0  
GSVT 0.886338 0.888874 0.883909 691.0  
SB 0.942330 0.940163 0.944514 1553.0  
SR 0.915822 0.926598 0.905313 907.0  
macro avg 0.902050 0.902756 0.901516 4026.0  
micro avg 0.909592 0.909592 0.909592 4026.0  
weighted avg 0.909661 0.909879 0.909592 4026.0

The result of Model Number:Dataset Number:Featuregroup Number:Rescale of 2 : 0 : 6 : 1

f1-score precision recall support  
AFIB 0.815471 0.814495 0.816587 875.0  
GSVT 0.831367 0.834227 0.828613 691.0  
SB 0.880542 0.875117 0.886041 1553.0  
SR 0.862623 0.871048 0.854454 907.0  
macro avg 0.847501 0.848722 0.846424 4026.0  
micro avg 0.853973 0.853973 0.853973 4026.0  
weighted avg 0.853922 0.854007 0.853973 4026.0

The result of Model Number:Dataset Number:Featuregroup Number:Rescale of 2 : 0 : 7 : 0

f1-score precision recall support  
AFIB 0.916256 0.926970 0.905958 204.0  
GSVT 0.826468 0.794914 0.942988 300.0  
SB 0.766793 0.764986 0.768616 892.0  
SR 0.952098 0.953928 0.950282 681.0  
macro avg 0.865404 0.860200 0.891961 2077.0  
micro avg 0.866856 0.866856 0.866856 2077.0

weighted avg 0.850850 0.847169 0.866856 2077.0

The result of Model Number:Dataset Number:Featuregroup Number:Rescale of 2 : 0 : 7 : 1

f1-score precision recall support

|              |          |          |          |        |
|--------------|----------|----------|----------|--------|
| AFIB         | 0.800454 | 0.818695 | 0.783136 | 875.0  |
| GSVT         | 0.851785 | 0.853469 | 0.850393 | 691.0  |
| SB           | 0.931910 | 0.926809 | 0.937070 | 1553.0 |
| SR           | 0.880795 | 0.870110 | 0.891867 | 907.0  |
| macro avg    | 0.866236 | 0.867271 | 0.865616 | 4026.0 |
| micro avg    | 0.878554 | 0.878554 | 0.878554 | 4026.0 |
| weighted avg | 0.878072 | 0.877951 | 0.878554 | 4026.0 |

The result of Model Number:Dataset Number:Featuregroup Number:Rescale of 2 : 0 : 8 : 0

f1-score precision recall support

|              |          |          |          |        |
|--------------|----------|----------|----------|--------|
| AFIB         | 0.688320 | 0.755799 | 0.632575 | 204.0  |
| GSVT         | 0.807581 | 0.796696 | 0.818897 | 300.0  |
| SB           | 0.857398 | 0.854539 | 0.860281 | 892.0  |
| SR           | 0.835116 | 0.823919 | 0.846642 | 681.0  |
| macro avg    | 0.797104 | 0.807738 | 0.789599 | 2077.0 |
| micro avg    | 0.827467 | 0.827467 | 0.827467 | 2077.0 |
| weighted avg | 0.826290 | 0.826446 | 0.827467 | 2077.0 |

The result of Model Number:Dataset Number:Featuregroup Number:Rescale of 2 : 0 : 8 : 1

f1-score precision recall support

|              |          |          |          |        |
|--------------|----------|----------|----------|--------|
| AFIB         | 0.635829 | 0.678927 | 0.598299 | 204.0  |
| GSVT         | 0.599101 | 0.616877 | 0.582547 | 300.0  |
| SB           | 0.626210 | 0.596149 | 0.659821 | 892.0  |
| SR           | 0.555646 | 0.580873 | 0.533125 | 681.0  |
| macro avg    | 0.604197 | 0.618206 | 0.593448 | 2077.0 |
| micro avg    | 0.601076 | 0.601076 | 0.601076 | 2077.0 |
| weighted avg | 0.600103 | 0.602265 | 0.601076 | 2077.0 |

The result of Model Number:Dataset Number:Featuregroup Number:Rescale of 2 : 0 : 9 : 0

f1-score precision recall support

|              |          |          |          |        |
|--------------|----------|----------|----------|--------|
| AFIB         | 0.814953 | 0.817705 | 0.812248 | 875.0  |
| GSVT         | 0.812801 | 0.807076 | 0.818681 | 691.0  |
| SB           | 0.855216 | 0.847278 | 0.863309 | 1553.0 |
| SR           | 0.822702 | 0.838557 | 0.807477 | 907.0  |
| macro avg    | 0.826418 | 0.827654 | 0.825429 | 4026.0 |
| micro avg    | 0.831974 | 0.831974 | 0.831974 | 4026.0 |
| weighted avg | 0.831860 | 0.831986 | 0.831974 | 4026.0 |

The result of Model Number:Dataset Number:Featuregroup Number:Rescale of 2 : 0 : 9 : 1

f1-score precision recall support

|      |          |          |          |        |
|------|----------|----------|----------|--------|
| AFIB | 0.827531 | 0.819777 | 0.835465 | 875.0  |
| GSVT | 0.841440 | 0.848188 | 0.834881 | 691.0  |
| SB   | 0.891970 | 0.888555 | 0.895416 | 1553.0 |
| SR   | 0.872013 | 0.880864 | 0.863361 | 907.0  |

macro avg 0.858239 0.859346 0.857281 4026.0  
micro avg 0.864775 0.864775 0.864775 4026.0  
weighted avg 0.864796 0.864946 0.864775 4026.0  
The result of Model Number:Dataset Number:Featuregroup Number:Rescale of 2 : 0 : 10 :  
0

|              | f1-score | precision | recall   | support |
|--------------|----------|-----------|----------|---------|
| AFIB         | 0.711417 | 0.737792  | 0.686963 | 204.0   |
| GSVT         | 0.732730 | 0.723568  | 0.742220 | 300.0   |
| SB           | 0.751310 | 0.744455  | 0.758299 | 892.0   |
| SR           | 0.731558 | 0.737235  | 0.725974 | 681.0   |
| macro avg    | 0.731753 | 0.735762  | 0.728364 | 2077.0  |
| micro avg    | 0.738372 | 0.738372  | 0.738372 | 2077.0  |
| weighted avg | 0.738232 | 0.738416  | 0.738372 | 2077.0  |

The result of Model Number:Dataset Number:Featuregroup Number:Rescale of 2 : 0 : 10 :  
1

|              | f1-score | precision | recall   | support |
|--------------|----------|-----------|----------|---------|
| AFIB         | 0.871841 | 0.881328  | 0.862810 | 204.0   |
| GSVT         | 0.901345 | 0.897586  | 0.905282 | 300.0   |
| SB           | 0.919815 | 0.918993  | 0.920640 | 892.0   |
| SR           | 0.911123 | 0.911130  | 0.911123 | 681.0   |
| macro avg    | 0.901031 | 0.902259  | 0.899964 | 2077.0  |
| micro avg    | 0.909621 | 0.909621  | 0.909621 | 2077.0  |
| weighted avg | 0.909585 | 0.909623  | 0.909621 | 2077.0  |

The result of Model Number:Dataset Number:Featuregroup Number:Rescale of 2 : 1 : 0 : 0

|              | f1-score | precision | recall   | support |
|--------------|----------|-----------|----------|---------|
| AFIB         | 0.862507 | 0.870181  | 0.855013 | 875.0   |
| GSVT         | 0.880611 | 0.870947  | 0.890548 | 691.0   |
| SB           | 0.947092 | 0.939718  | 0.954591 | 1553.0  |
| SR           | 0.915619 | 0.928597  | 0.903002 | 907.0   |
| macro avg    | 0.901457 | 0.902361  | 0.900789 | 4026.0  |
| micro avg    | 0.910335 | 0.910335  | 0.910335 | 4026.0  |
| weighted avg | 0.910208 | 0.910296  | 0.910335 | 4026.0  |

The result of Model Number:Dataset Number:Featuregroup Number:Rescale of 2 : 1 : 0 : 1

|              | f1-score | precision | recall   | support |
|--------------|----------|-----------|----------|---------|
| AFIB         | 0.846087 | 0.881870  | 0.813375 | 204.0   |
| GSVT         | 0.779184 | 0.780549  | 0.789513 | 300.0   |
| SB           | 0.838864 | 0.798901  | 0.883849 | 892.0   |
| SR           | 0.741597 | 0.801327  | 0.691495 | 681.0   |
| macro avg    | 0.801433 | 0.815662  | 0.794558 | 2077.0  |
| micro avg    | 0.800233 | 0.800233  | 0.800233 | 2077.0  |
| weighted avg | 0.799062 | 0.805195  | 0.800233 | 2077.0  |

The result of Model Number:Dataset Number:Featuregroup Number:Rescale of 2 : 1 : 1 : 0

f1-score precision recall support

AFIB 0.832332 0.838851 0.825959 875.0  
GSVT 0.834528 0.823877 0.845509 691.0  
SB 0.875325 0.871815 0.878873 1553.0  
SR 0.856832 0.865243 0.848615 907.0  
macro avg 0.849754 0.849946 0.849739 4026.0  
micro avg 0.854830 0.854830 0.854830 4026.0  
weighted avg 0.854813 0.854942 0.854830 4026.0

The result of Model Number:Dataset Number:Featuregroup Number:Rescale of 2 : 1 : 1 : 1

f1-score precision recall support

AFIB 0.797156 0.802890 0.791505 875.0  
GSVT 0.795886 0.791120 0.800721 691.0  
SB 0.839543 0.830241 0.849057 1553.0  
SR 0.805606 0.819979 0.791755 907.0  
macro avg 0.809548 0.811058 0.808260 4026.0  
micro avg 0.815344 0.815344 0.815344 4026.0  
weighted avg 0.815192 0.815270 0.815344 4026.0

The result of Model Number:Dataset Number:Featuregroup Number:Rescale of 2 : 1 : 2 : 0

f1-score precision recall support

AFIB 0.723572 0.734542 0.712943 204.0  
GSVT 0.735207 0.729009 0.741549 300.0  
SB 0.751515 0.749090 0.753957 892.0  
SR 0.743447 0.746209 0.740726 681.0  
macro avg 0.738435 0.739713 0.737294 2077.0  
micro avg 0.743798 0.743798 0.743798 2077.0  
weighted avg 0.743770 0.743816 0.743798 2077.0

The result of Model Number:Dataset Number:Featuregroup Number:Rescale of 2 : 1 : 2 : 1

f1-score precision recall support

AFIB 0.860207 0.877385 0.843820 204.0  
GSVT 0.869867 0.858998 0.881146 300.0  
SB 0.886474 0.877999 0.895118 892.0  
SR 0.870376 0.881794 0.859274 681.0  
macro avg 0.871731 0.874044 0.869839 2077.0  
micro avg 0.876309 0.876309 0.876309 2077.0  
weighted avg 0.876218 0.876438 0.876309 2077.0

The result of Model Number:Dataset Number:Featuregroup Number:Rescale of 2 : 1 : 3 : 0

f1-score precision recall support

AFIB 0.688133 0.689325 0.686955 875.0  
GSVT 0.696477 0.688474 0.704725 691.0  
SB 0.733414 0.724571 0.742479 1553.0  
SR 0.698553 0.719719 0.678612 907.0  
macro avg 0.704144 0.705522 0.703193 4026.0  
micro avg 0.709544 0.709544 0.709544 4026.0  
weighted avg 0.709380 0.709622 0.709544 4026.0



The result of Model Number:Dataset Number:Featuregroup Number:Rescale of 2 : 1 : 3 : 1

|              | f1-score | precision | recall   | support |
|--------------|----------|-----------|----------|---------|
| AFIB         | 0.717192 | 0.716535  | 0.717936 | 875.0   |
| GSVT         | 0.731892 | 0.730473  | 0.733395 | 691.0   |
| SB           | 0.776633 | 0.774903  | 0.778383 | 1553.0  |
| SR           | 0.755436 | 0.760364  | 0.750598 | 907.0   |
| macro avg    | 0.745288 | 0.745569  | 0.745078 | 4026.0  |
| micro avg    | 0.751264 | 0.751264  | 0.751264 | 4026.0  |
| weighted avg | 0.751260 | 0.751317  | 0.751264 | 4026.0  |

The result of Model Number:Dataset Number:Featuregroup Number:Rescale of 2 : 1 : 4 : 0

|              | f1-score | precision | recall   | support |
|--------------|----------|-----------|----------|---------|
| AFIB         | 0.716678 | 0.721364  | 0.712096 | 204.0   |
| GSVT         | 0.734634 | 0.732942  | 0.736343 | 300.0   |
| SB           | 0.747747 | 0.746668  | 0.748835 | 892.0   |
| SR           | 0.741854 | 0.742629  | 0.741094 | 681.0   |
| macro avg    | 0.735228 | 0.735901  | 0.734592 | 2077.0  |
| micro avg    | 0.740884 | 0.740884  | 0.740884 | 2077.0  |
| weighted avg | 0.740869 | 0.740876  | 0.740884 | 2077.0  |

The result of Model Number:Dataset Number:Featuregroup Number:Rescale of 2 : 1 : 4 : 1

|              | f1-score | precision | recall   | support |
|--------------|----------|-----------|----------|---------|
| AFIB         | 0.734400 | 0.741095  | 0.727921 | 204.0   |
| GSVT         | 0.753565 | 0.751098  | 0.756072 | 300.0   |
| SB           | 0.767341 | 0.766830  | 0.767856 | 892.0   |
| SR           | 0.760592 | 0.760374  | 0.760822 | 681.0   |
| macro avg    | 0.753975 | 0.754849  | 0.753168 | 2077.0  |
| micro avg    | 0.759925 | 0.759925  | 0.759925 | 2077.0  |
| weighted avg | 0.759903 | 0.759913  | 0.759925 | 2077.0  |

The result of Model Number:Dataset Number:Featuregroup Number:Rescale of 2 : 1 : 5 : 0

|              | f1-score | precision | recall   | support |
|--------------|----------|-----------|----------|---------|
| AFIB         | 0.693737 | 0.684446  | 0.703327 | 875.0   |
| GSVT         | 0.709247 | 0.714783  | 0.703809 | 691.0   |
| SB           | 0.753023 | 0.750667  | 0.755398 | 1553.0  |
| SR           | 0.734813 | 0.744554  | 0.725336 | 907.0   |
| macro avg    | 0.722705 | 0.723612  | 0.721967 | 4026.0  |
| micro avg    | 0.728454 | 0.728454  | 0.728454 | 4026.0  |
| weighted avg | 0.728522 | 0.728739  | 0.728454 | 4026.0  |

The result of Model Number:Dataset Number:Featuregroup Number:Rescale of 2 : 1 : 5 : 1

|           | f1-score | precision | recall   | support |
|-----------|----------|-----------|----------|---------|
| AFIB      | 0.725931 | 0.730276  | 0.721675 | 204.0   |
| GSVT      | 0.745269 | 0.743054  | 0.747503 | 300.0   |
| SB        | 0.756681 | 0.755754  | 0.757614 | 892.0   |
| SR        | 0.751165 | 0.752052  | 0.750287 | 681.0   |
| macro avg | 0.744762 | 0.745284  | 0.744270 | 2077.0  |

micro avg 0.750221 0.750221 0.750221 2077.0  
weighted avg 0.750204 0.750203 0.750221 2077.0  
The result of Model Number:Dataset Number:Featuregroup Number:Rescale of 2 : 1 : 6 : 0

|              | f1-score | precision | recall   | support |
|--------------|----------|-----------|----------|---------|
| AFIB         | 0.691610 | 0.681790  | 0.701794 | 875.0   |
| GSVT         | 0.716692 | 0.725835  | 0.707885 | 691.0   |
| SB           | 0.761646 | 0.760528  | 0.762774 | 1553.0  |
| SR           | 0.742671 | 0.748242  | 0.737185 | 907.0   |
| macro avg    | 0.728155 | 0.729099  | 0.727409 | 4026.0  |
| micro avg    | 0.734335 | 0.734335  | 0.734335 | 4026.0  |
| weighted avg | 0.734434 | 0.734693  | 0.734335 | 4026.0  |

The result of Model Number:Dataset Number:Featuregroup Number:Rescale of 2 : 1 : 6 : 1

|              | f1-score | precision | recall   | support |
|--------------|----------|-----------|----------|---------|
| AFIB         | 0.799144 | 0.806956  | 0.791668 | 875.0   |
| GSVT         | 0.793040 | 0.787023  | 0.799410 | 691.0   |
| SB           | 0.839126 | 0.830493  | 0.848016 | 1553.0  |
| SR           | 0.812491 | 0.825558  | 0.800061 | 907.0   |
| macro avg    | 0.810950 | 0.812508  | 0.809789 | 4026.0  |
| micro avg    | 0.816624 | 0.816624  | 0.816624 | 4026.0  |
| weighted avg | 0.816526 | 0.816805  | 0.816624 | 4026.0  |

The result of Model Number:Dataset Number:Featuregroup Number:Rescale of 2 : 1 : 7 : 0

|              | f1-score | precision | recall   | support |
|--------------|----------|-----------|----------|---------|
| AFIB         | 0.694596 | 0.696834  | 0.692438 | 875.0   |
| GSVT         | 0.704362 | 0.693179  | 0.715975 | 691.0   |
| SB           | 0.742160 | 0.735963  | 0.748467 | 1553.0  |
| SR           | 0.704853 | 0.722755  | 0.687843 | 907.0   |
| macro avg    | 0.711493 | 0.712183  | 0.711181 | 4026.0  |
| micro avg    | 0.717055 | 0.717055  | 0.717055 | 4026.0  |
| weighted avg | 0.716930 | 0.717140  | 0.717055 | 4026.0  |

The result of Model Number:Dataset Number:Featuregroup Number:Rescale of 2 : 1 : 7 : 1

|              | f1-score | precision | recall   | support |
|--------------|----------|-----------|----------|---------|
| AFIB         | 0.770014 | 0.759318  | 0.781089 | 875.0   |
| GSVT         | 0.797531 | 0.808170  | 0.787272 | 691.0   |
| SB           | 0.847237 | 0.845501  | 0.848983 | 1553.0  |
| SR           | 0.825186 | 0.831562  | 0.818908 | 907.0   |
| macro avg    | 0.809992 | 0.811138  | 0.809063 | 4026.0  |
| micro avg    | 0.816860 | 0.816860  | 0.816860 | 4026.0  |
| weighted avg | 0.816954 | 0.817223  | 0.816860 | 4026.0  |

The result of Model Number:Dataset Number:Featuregroup Number:Rescale of 2 : 1 : 8 : 0

|      | f1-score | precision | recall   | support |
|------|----------|-----------|----------|---------|
| AFIB | 0.898697 | 0.903630  | 0.893876 | 875.0   |
| GSVT | 0.899954 | 0.888576  | 0.911768 | 691.0   |
| SB   | 0.946457 | 0.942659  | 0.950294 | 1553.0  |

SR 0.926140 0.937383 0.915221 907.0  
macro avg 0.917812 0.918062 0.917790 4026.0  
micro avg 0.923519 0.923519 0.923519 4026.0  
weighted avg 0.923518 0.923705 0.923519 4026.0

The result of Model Number:Dataset Number:Featuregroup Number:Rescale of 2 : 1 : 8 : 1

f1-score precision recall support  
AFIB 0.738667 0.741362 0.736039 875.0  
GSVT 0.751434 0.741649 0.761544 691.0  
SB 0.792087 0.783363 0.801012 1553.0  
SR 0.750671 0.771408 0.731061 907.0  
macro avg 0.758215 0.759445 0.757414 4026.0  
micro avg 0.764358 0.764358 0.764358 4026.0  
weighted avg 0.764169 0.764382 0.764358 4026.0

The result of Model Number:Dataset Number:Featuregroup Number:Rescale of 2 : 1 : 9 : 0

f1-score precision recall support  
AFIB 0.736895 0.752352 0.722080 204.0  
GSVT 0.753989 0.749528 0.758512 300.0  
SB 0.772371 0.770562 0.774189 892.0  
SR 0.765847 0.765627 0.766074 681.0  
macro avg 0.757276 0.759517 0.755214 2077.0  
micro avg 0.764146 0.764146 0.764146 2077.0  
weighted avg 0.764093 0.764117 0.764146 2077.0

The result of Model Number:Dataset Number:Featuregroup Number:Rescale of 2 : 1 : 9 : 1

f1-score precision recall support  
AFIB 0.777748 0.794062 0.762112 204.0  
GSVT 0.795790 0.791082 0.800563 300.0  
SB 0.815191 0.813282 0.817110 892.0  
SR 0.808305 0.808073 0.808545 681.0  
macro avg 0.799259 0.801625 0.797083 2077.0  
micro avg 0.806510 0.806510 0.806510 2077.0  
weighted avg 0.806453 0.806480 0.806510 2077.0

The result of Model Number:Dataset Number:Featuregroup Number:Rescale of 2 : 1 : 10 : 0

f1-score precision recall support  
AFIB 0.760245 0.779496 0.741993 204.0  
GSVT 0.776756 0.768309 0.785519 300.0  
SB 0.798634 0.794648 0.802663 892.0  
SR 0.786256 0.789783 0.782791 681.0  
macro avg 0.780473 0.783059 0.778242 2077.0  
micro avg 0.787712 0.787712 0.787712 2077.0  
weighted avg 0.787645 0.787761 0.787712 2077.0

The result of Model Number:Dataset Number:Featuregroup Number:Rescale of 2 : 1 : 10 : 1

f1-score precision recall support  
AFIB 0.708175 0.717553 0.699145 204.0  
GSVT 0.729546 0.726913 0.732215 300.0  
SB 0.738633 0.736334 0.740949 892.0  
SR 0.730584 0.731991 0.729203 681.0  
macro avg 0.726734 0.728198 0.725378 2077.0  
micro avg 0.731730 0.731730 0.731730 2077.0  
weighted avg 0.731690 0.731705 0.731730 2077.0  
The result of Model Number:Dataset Number:Featuregroup Number:Rescale of 3 : 0 : 0 : 0

f1-score precision recall support  
AFIB 0.762086 0.777374 0.747540 204.0  
GSVT 0.779748 0.771643 0.788066 300.0  
SB 0.794169 0.791080 0.797285 892.0  
SR 0.785824 0.789103 0.782590 681.0  
macro avg 0.780457 0.782300 0.778870 2077.0  
micro avg 0.786249 0.786249 0.786249 2077.0  
weighted avg 0.786199 0.786278 0.786249 2077.0  
The result of Model Number:Dataset Number:Featuregroup Number:Rescale of 3 : 0 : 0 : 1

f1-score precision recall support  
AFIB 0.764919 0.824537 0.713695 204.0  
GSVT 0.788245 0.801588 0.775372 300.0  
SB 0.835391 0.827703 0.843250 892.0  
SR 0.802142 0.790510 0.814158 681.0  
macro avg 0.797674 0.811084 0.786619 2077.0  
micro avg 0.811182 0.811182 0.811182 2077.0  
weighted avg 0.810758 0.811425 0.811182 2077.0  
The result of Model Number:Dataset Number:Featuregroup Number:Rescale of 3 : 0 : 1 : 0

f1-score precision recall support  
AFIB 0.820069 0.830700 0.809925 204.0  
GSVT 0.851801 0.851250 0.852378 300.0  
SB 0.869749 0.867912 0.871599 892.0  
SR 0.861001 0.860512 0.861510 681.0  
macro avg 0.850655 0.852594 0.848853 2077.0  
micro avg 0.859457 0.859457 0.859457 2077.0  
weighted avg 0.859409 0.859424 0.859457 2077.0  
The result of Model Number:Dataset Number:Featuregroup Number:Rescale of 3 : 0 : 1 : 1

f1-score precision recall support  
AFIB 0.810902 0.820176 0.802148 204.0  
GSVT 0.829882 0.824971 0.834866 300.0  
SB 0.796672 0.767244 0.846345 892.0  
SR 0.668282 0.671516 0.665096 681.0  
macro avg 0.776434 0.770977 0.787114 2077.0  
micro avg 0.780919 0.780919 0.780919 2077.0

weighted avg 0.760770 0.749394 0.780919 2077.0

The result of Model Number:Dataset Number:Featuregroup Number:Rescale of 3 : 0 : 2 : 0

f1-score precision recall support

|              |          |          |          |        |
|--------------|----------|----------|----------|--------|
| AFIB         | 0.670146 | 0.656797 | 0.684085 | 875.0  |
| GSVT         | 0.545440 | 0.507230 | 0.683693 | 691.0  |
| SB           | 0.442564 | 0.443327 | 0.441805 | 1553.0 |
| SR           | 0.717453 | 0.723771 | 0.711275 | 907.0  |
| macro avg    | 0.593901 | 0.582781 | 0.630215 | 4026.0 |
| micro avg    | 0.596685 | 0.596685 | 0.596685 | 4026.0 |
| weighted avg | 0.571612 | 0.563870 | 0.596685 | 4026.0 |

The result of Model Number:Dataset Number:Featuregroup Number:Rescale of 3 : 0 : 2 : 1

f1-score precision recall support

|              |          |          |          |        |
|--------------|----------|----------|----------|--------|
| AFIB         | 0.730296 | 0.723260 | 0.737583 | 875.0  |
| GSVT         | 0.749430 | 0.751574 | 0.747376 | 691.0  |
| SB           | 0.796773 | 0.794941 | 0.798619 | 1553.0 |
| SR           | 0.774359 | 0.783471 | 0.765474 | 907.0  |
| macro avg    | 0.762715 | 0.763311 | 0.762263 | 4026.0 |
| micro avg    | 0.769092 | 0.769092 | 0.769092 | 4026.0 |
| weighted avg | 0.769150 | 0.769335 | 0.769092 | 4026.0 |

The result of Model Number:Dataset Number:Featuregroup Number:Rescale of 3 : 0 : 3 : 0

f1-score precision recall support

|              |          |          |          |        |
|--------------|----------|----------|----------|--------|
| AFIB         | 0.826842 | 0.840269 | 0.813882 | 875.0  |
| GSVT         | 0.879371 | 0.882127 | 0.876686 | 691.0  |
| SB           | 0.956712 | 0.953415 | 0.960036 | 1553.0 |
| SR           | 0.905727 | 0.895639 | 0.916100 | 907.0  |
| macro avg    | 0.892163 | 0.892862 | 0.891676 | 4026.0 |
| micro avg    | 0.904068 | 0.904068 | 0.904068 | 4026.0 |
| weighted avg | 0.903726 | 0.903573 | 0.904068 | 4026.0 |

The result of Model Number:Dataset Number:Featuregroup Number:Rescale of 3 : 0 : 3 : 1

f1-score precision recall support

|              |          |          |          |        |
|--------------|----------|----------|----------|--------|
| AFIB         | 0.649234 | 0.644399 | 0.654208 | 875.0  |
| GSVT         | 0.661343 | 0.663704 | 0.659038 | 691.0  |
| SB           | 0.701766 | 0.700103 | 0.703437 | 1553.0 |
| SR           | 0.685751 | 0.691925 | 0.679711 | 907.0  |
| macro avg    | 0.674523 | 0.675033 | 0.674098 | 4026.0 |
| micro avg    | 0.679772 | 0.679772 | 0.679772 | 4026.0 |
| weighted avg | 0.679803 | 0.679907 | 0.679772 | 4026.0 |

The result of Model Number:Dataset Number:Featuregroup Number:Rescale of 3 : 0 : 4 : 0

f1-score precision recall support

|      |          |          |          |       |
|------|----------|----------|----------|-------|
| AFIB | 0.847811 | 0.893930 | 0.806434 | 204.0 |
| GSVT | 0.890045 | 0.876583 | 0.903962 | 300.0 |
| SB   | 0.911196 | 0.905268 | 0.917215 | 892.0 |
| SR   | 0.899954 | 0.900765 | 0.899165 | 681.0 |

macro avg 0.887251 0.894137 0.881694 2077.0  
micro avg 0.898502 0.898502 0.898502 2077.0  
weighted avg 0.898229 0.898535 0.898502 2077.0

The result of Model Number:Dataset Number:Featuregroup Number:Rescale of 3 : 0 : 4 : 1

f1-score precision recall support  
AFIB 0.700956 0.723723 0.679715 204.0  
GSVT 0.720308 0.711124 0.729878 300.0  
SB 0.740630 0.737837 0.743452 892.0  
SR 0.730271 0.731594 0.728982 681.0  
macro avg 0.723041 0.726069 0.720507 2077.0  
micro avg 0.730487 0.730487 0.730487 2077.0  
weighted avg 0.730402 0.730545 0.730487 2077.0

The result of Model Number:Dataset Number:Featuregroup Number:Rescale of 3 : 0 : 5 : 0

f1-score precision recall support  
AFIB 0.855490 0.848946 0.862248 875.0  
GSVT 0.875174 0.879959 0.870491 691.0  
SB 0.926738 0.926089 0.927395 1553.0  
SR 0.902122 0.906498 0.897835 907.0  
macro avg 0.889881 0.890373 0.889492 4026.0  
micro avg 0.896810 0.896810 0.896810 4026.0  
weighted avg 0.896857 0.896992 0.896810 4026.0

The result of Model Number:Dataset Number:Featuregroup Number:Rescale of 3 : 0 : 5 : 1

f1-score precision recall support  
AFIB 0.677110 0.677871 0.676473 204.0  
GSVT 0.692655 0.691109 0.694261 300.0  
SB 0.707337 0.706392 0.708287 892.0  
SR 0.702039 0.703807 0.700289 681.0  
macro avg 0.694785 0.694795 0.694827 2077.0  
micro avg 0.700514 0.700514 0.700514 2077.0  
weighted avg 0.700510 0.700536 0.700514 2077.0

The result of Model Number:Dataset Number:Featuregroup Number:Rescale of 3 : 0 : 6 : 0

f1-score precision recall support  
AFIB 0.910926 0.918523 0.903766 204.0  
GSVT 0.934990 0.930684 0.939355 300.0  
SB 0.949090 0.945719 0.952492 892.0  
SR 0.940324 0.944536 0.936199 681.0  
macro avg 0.933832 0.934865 0.932953 2077.0  
micro avg 0.940466 0.940466 0.940466 2077.0  
weighted avg 0.940431 0.940488 0.940466 2077.0

The result of Model Number:Dataset Number:Featuregroup Number:Rescale of 3 : 0 : 6 : 1

f1-score precision recall support  
AFIB 0.687054 0.684829 0.689314 875.0  
GSVT 0.695021 0.697180 0.692943 691.0

SB 0.733360 0.731763 0.734966 1553.0  
SR 0.719836 0.723232 0.716499 907.0  
macro avg 0.708818 0.709251 0.708430 4026.0  
micro avg 0.713671 0.713671 0.713671 4026.0  
weighted avg 0.713669 0.713705 0.713671 4026.0

The result of Model Number:Dataset Number:Featuregroup Number:Rescale of 3 : 0 : 7 : 0

f1-score precision recall support

AFIB 0.881992 0.873923 0.890250 875.0  
GSVT 0.893293 0.901175 0.885682 691.0  
SB 0.949542 0.944536 0.954615 1553.0  
SR 0.928077 0.939261 0.917240 907.0  
macro avg 0.913226 0.914724 0.911947 4026.0  
micro avg 0.920375 0.920375 0.920375 4026.0  
weighted avg 0.920371 0.920558 0.920375 4026.0

The result of Model Number:Dataset Number:Featuregroup Number:Rescale of 3 : 0 : 7 : 1

f1-score precision recall support

AFIB 0.850758 0.859017 0.843183 204.0  
GSVT 0.876260 0.872118 0.880673 300.0  
SB 0.894004 0.893007 0.895006 892.0  
SR 0.886138 0.887056 0.885227 681.0  
macro avg 0.876790 0.877799 0.876022 2077.0  
micro avg 0.884640 0.884640 0.884640 2077.0  
weighted avg 0.884615 0.884700 0.884640 2077.0

The result of Model Number:Dataset Number:Featuregroup Number:Rescale of 3 : 0 : 8 : 0

f1-score precision recall support

AFIB 0.649087 0.639135 0.659462 875.0  
GSVT 0.671469 0.678050 0.665146 691.0  
SB 0.714622 0.712952 0.716322 1553.0  
SR 0.696770 0.705605 0.688169 907.0  
macro avg 0.682987 0.683935 0.682275 4026.0  
micro avg 0.688838 0.688838 0.688838 4026.0  
weighted avg 0.688950 0.689263 0.688838 4026.0

The result of Model Number:Dataset Number:Featuregroup Number:Rescale of 3 : 0 : 8 : 1

f1-score precision recall support

AFIB 0.780269 0.767777 0.877961 204.0  
GSVT 0.913489 0.902890 0.924674 300.0  
SB 0.944076 0.940511 0.947674 892.0  
SR 0.740739 0.744569 0.737074 681.0  
macro avg 0.844644 0.838937 0.871846 2077.0  
micro avg 0.868454 0.868454 0.868454 2077.0  
weighted avg 0.856900 0.853867 0.868454 2077.0

The result of Model Number:Dataset Number:Featuregroup Number:Rescale of 3 : 0 : 9 : 0

f1-score precision recall support

AFIB 0.893640 0.904088 0.883601 204.0  
GSVT 0.918223 0.914001 0.922509 300.0  
SB 0.931224 0.928328 0.934144 892.0  
SR 0.923204 0.925820 0.920641 681.0  
macro avg 0.916572 0.918059 0.915224 2077.0  
micro avg 0.923072 0.923072 0.923072 2077.0  
weighted avg 0.923025 0.923056 0.923072 2077.0

The result of Model Number:Dataset Number:Featuregroup Number:Rescale of 3 : 0 : 9 : 1

f1-score precision recall support

AFIB 0.830689 0.839531 0.822492 204.0  
GSVT 0.855102 0.849404 0.861127 300.0  
SB 0.873172 0.872391 0.873955 892.0  
SR 0.865809 0.866965 0.864663 681.0  
macro avg 0.856193 0.857073 0.855559 2077.0  
micro avg 0.864001 0.864001 0.864001 2077.0  
weighted avg 0.863975 0.864064 0.864001 2077.0

The result of Model Number:Dataset Number:Featuregroup Number:Rescale of 3 : 0 : 10 : 0

f1-score precision recall support

AFIB 0.659950 0.702950 0.622200 204.0  
GSVT 0.688862 0.671930 0.706763 300.0  
SB 0.709064 0.699956 0.718438 892.0  
SR 0.690647 0.698894 0.682639 681.0  
macro avg 0.687131 0.693432 0.682510 2077.0  
micro avg 0.695562 0.695562 0.695562 2077.0  
weighted avg 0.695284 0.695854 0.695562 2077.0

The result of Model Number:Dataset Number:Featuregroup Number:Rescale of 3 : 0 : 10 : 1

f1-score precision recall support

AFIB 0.829488 0.833839 0.825232 875.0  
GSVT 0.846833 0.845312 0.848420 691.0  
SB 0.919515 0.912463 0.926679 1553.0  
SR 0.887074 0.895953 0.878375 907.0  
macro avg 0.870727 0.871892 0.869676 4026.0  
micro avg 0.880316 0.880316 0.880316 4026.0  
weighted avg 0.880166 0.880130 0.880316 4026.0

The result of Model Number:Dataset Number:Featuregroup Number:Rescale of 3 : 1 : 0 : 0

f1-score precision recall support

AFIB 0.759505 0.822908 0.706687 204.0  
GSVT 0.814657 0.804414 0.825497 300.0  
SB 0.835455 0.823750 0.847594 892.0  
SR 0.812665 0.816472 0.809289 681.0  
macro avg 0.805570 0.816886 0.797267 2077.0



micro avg 0.818003 0.818003 0.818003 2077.0  
weighted avg 0.817519 0.818488 0.818003 2077.0  
The result of Model Number:Dataset Number:Featuregroup Number:Rescale of 3 : 1 : 0 : 1

|              | f1-score | precision | recall   | support |
|--------------|----------|-----------|----------|---------|
| AFIB         | 0.767298 | 0.792220  | 0.744047 | 204.0   |
| GSVT         | 0.788482 | 0.778428  | 0.798958 | 300.0   |
| SB           | 0.810727 | 0.807670  | 0.813816 | 892.0   |
| SR           | 0.799388 | 0.800836  | 0.797976 | 681.0   |
| macro avg    | 0.791474 | 0.794789  | 0.788699 | 2077.0  |
| micro avg    | 0.799624 | 0.799624  | 0.799624 | 2077.0  |
| weighted avg | 0.799531 | 0.799688  | 0.799624 | 2077.0  |

The result of Model Number:Dataset Number:Featuregroup Number:Rescale of 3 : 1 : 1 : 0

|              | f1-score | precision | recall   | support |
|--------------|----------|-----------|----------|---------|
| AFIB         | 0.698162 | 0.743652  | 0.658226 | 204.0   |
| GSVT         | 0.728747 | 0.710835  | 0.747685 | 300.0   |
| SB           | 0.750120 | 0.740484  | 0.760036 | 892.0   |
| SR           | 0.730636 | 0.739361  | 0.722164 | 681.0   |
| macro avg    | 0.726916 | 0.733583  | 0.722028 | 2077.0  |
| micro avg    | 0.735835 | 0.735835  | 0.735835 | 2077.0  |
| weighted avg | 0.735541 | 0.736144  | 0.735835 | 2077.0  |

The result of Model Number:Dataset Number:Featuregroup Number:Rescale of 3 : 1 : 1 : 1

|              | f1-score | precision | recall   | support |
|--------------|----------|-----------|----------|---------|
| AFIB         | 0.879083 | 0.868714  | 0.889747 | 875.0   |
| GSVT         | 0.893975 | 0.899631  | 0.888421 | 691.0   |
| SB           | 0.953150 | 0.951868  | 0.954438 | 1553.0  |
| SR           | 0.929734 | 0.938542  | 0.921121 | 907.0   |
| macro avg    | 0.913985 | 0.914689  | 0.913432 | 4026.0  |
| micro avg    | 0.921542 | 0.921542  | 0.921542 | 4026.0  |
| weighted avg | 0.921620 | 0.921828  | 0.921542 | 4026.0  |

The result of Model Number:Dataset Number:Featuregroup Number:Rescale of 3 : 1 : 2 : 0

|              | f1-score | precision | recall   | support |
|--------------|----------|-----------|----------|---------|
| AFIB         | 0.706548 | 0.723331  | 0.690590 | 204.0   |
| GSVT         | 0.729756 | 0.722914  | 0.736806 | 300.0   |
| SB           | 0.745428 | 0.744595  | 0.746264 | 892.0   |
| SR           | 0.738233 | 0.737491  | 0.738989 | 681.0   |
| macro avg    | 0.729991 | 0.732083  | 0.728162 | 2077.0  |
| micro avg    | 0.737044 | 0.737044  | 0.737044 | 2077.0  |
| weighted avg | 0.736987 | 0.737046  | 0.737044 | 2077.0  |

The result of Model Number:Dataset Number:Featuregroup Number:Rescale of 3 : 1 : 2 : 1

|      | f1-score | precision | recall   | support |
|------|----------|-----------|----------|---------|
| AFIB | 0.759329 | 0.769789  | 0.749484 | 875.0   |
| GSVT | 0.775906 | 0.772693  | 0.779356 | 691.0   |
| SB   | 0.826461 | 0.815625  | 0.837623 | 1553.0  |

SR 0.800514 0.812468 0.789261 907.0  
macro avg 0.790553 0.792644 0.788931 4026.0  
micro avg 0.797571 0.797571 0.797571 4026.0  
weighted avg 0.797348 0.797583 0.797571 4026.0

The result of Model Number:Dataset Number:Featuregroup Number:Rescale of 3 : 1 : 3 : 0

f1-score precision recall support  
AFIB 0.723123 0.728530 0.717823 204.0  
GSVT 0.741600 0.737686 0.745556 300.0  
SB 0.754115 0.753107 0.755129 892.0  
SR 0.747473 0.748906 0.746047 681.0  
macro avg 0.741578 0.742057 0.741139 2077.0  
micro avg 0.747104 0.747104 0.747104 2077.0  
weighted avg 0.747086 0.747088 0.747104 2077.0

The result of Model Number:Dataset Number:Featuregroup Number:Rescale of 3 : 1 : 3 : 1

f1-score precision recall support  
AFIB 0.795400 0.778403 0.813202 875.0  
GSVT 0.823688 0.836283 0.811540 691.0  
SB 0.878049 0.878165 0.877937 1553.0  
SR 0.855429 0.864287 0.846753 907.0  
macro avg 0.838142 0.839285 0.837358 4026.0  
micro avg 0.845446 0.845446 0.845446 4026.0  
weighted avg 0.845660 0.846168 0.845446 4026.0

The result of Model Number:Dataset Number:Featuregroup Number:Rescale of 3 : 1 : 4 : 0

f1-score precision recall support  
AFIB 0.816919 0.843104 0.792556 204.0  
GSVT 0.841359 0.826884 0.856474 300.0  
SB 0.855913 0.847452 0.864547 892.0  
SR 0.833028 0.843452 0.822876 681.0  
macro avg 0.836805 0.840223 0.834113 2077.0  
micro avg 0.842647 0.842647 0.842647 2077.0  
weighted avg 0.842478 0.842743 0.842647 2077.0

The result of Model Number:Dataset Number:Featuregroup Number:Rescale of 3 : 1 : 4 : 1

f1-score precision recall support  
AFIB 0.831703 0.825509 0.838074 875.0  
GSVT 0.847214 0.850239 0.844261 691.0  
SB 0.898998 0.896868 0.901139 1553.0  
SR 0.878482 0.886391 0.870745 907.0  
macro avg 0.864099 0.864752 0.863555 4026.0  
micro avg 0.870823 0.870823 0.870823 4026.0  
weighted avg 0.870862 0.870996 0.870823 4026.0

The result of Model Number:Dataset Number:Featuregroup Number:Rescale of 3 : 1 : 5 : 0

f1-score precision recall support  
AFIB 0.615669 0.629591 0.602367 875.0

GSVT 0.652748 0.655527 0.650033 691.0  
SB 0.708750 0.705409 0.712126 1553.0  
SR 0.671531 0.661230 0.682185 907.0  
macro avg 0.662174 0.662939 0.661678 4026.0  
micro avg 0.670869 0.670869 0.670869 4026.0  
weighted avg 0.670523 0.670417 0.670869 4026.0

The result of Model Number:Dataset Number:Featuregroup Number:Rescale of 3 : 1 : 5 : 1

f1-score precision recall support

AFIB 0.781017 0.775607 0.786661 875.0  
GSVT 0.793066 0.796285 0.790002 691.0  
SB 0.860479 0.851531 0.869621 1553.0  
SR 0.817032 0.836044 0.798941 907.0  
macro avg 0.812899 0.814867 0.811306 4026.0  
micro avg 0.822002 0.822002 0.822002 4026.0  
weighted avg 0.821851 0.822059 0.822002 4026.0

The result of Model Number:Dataset Number:Featuregroup Number:Rescale of 3 : 1 : 6 : 0

f1-score precision recall support

AFIB 0.842390 0.846238 0.838624 875.0  
GSVT 0.856434 0.849191 0.863864 691.0  
SB 0.905268 0.896024 0.914710 1553.0  
SR 0.858547 0.876646 0.841226 907.0  
macro avg 0.865660 0.867024 0.864606 4026.0  
micro avg 0.872892 0.872892 0.872892 4026.0  
weighted avg 0.872695 0.872800 0.872892 4026.0

The result of Model Number:Dataset Number:Featuregroup Number:Rescale of 3 : 1 : 6 : 1

f1-score precision recall support

AFIB 0.780851 0.776180 0.785685 875.0  
GSVT 0.787246 0.791496 0.783154 691.0  
SB 0.834362 0.831923 0.836828 1553.0  
SR 0.815509 0.821367 0.809750 907.0  
macro avg 0.804492 0.805241 0.803854 4026.0  
micro avg 0.810400 0.810400 0.810400 4026.0  
weighted avg 0.810398 0.810491 0.810400 4026.0

The result of Model Number:Dataset Number:Featuregroup Number:Rescale of 3 : 1 : 7 : 0

f1-score precision recall support

AFIB 0.765962 0.768000 0.763982 875.0  
GSVT 0.780691 0.775192 0.786316 691.0  
SB 0.825283 0.816868 0.833889 1553.0  
SR 0.787558 0.804712 0.771148 907.0  
macro avg 0.789874 0.791193 0.788834 4026.0  
micro avg 0.796396 0.796396 0.796396 4026.0  
weighted avg 0.796238 0.796356 0.796396 4026.0

The result of Model Number:Dataset Number:Featuregroup Number:Rescale of 3 : 1 : 7 : 1

f1-score precision recall support  
AFIB 0.748553 0.825494 0.685191 204.0  
GSVT 0.890756 0.878718 0.903216 300.0  
SB 0.948591 0.944798 0.952419 892.0  
SR 0.922845 0.910370 0.935707 681.0  
macro avg 0.877686 0.889845 0.869133 2077.0  
micro avg 0.913586 0.913586 0.913586 2077.0  
weighted avg 0.912148 0.912247 0.913586 2077.0  
The result of Model Number:Dataset Number:Featuregroup Number:Rescale of 3 : 1 : 8 : 0

f1-score precision recall support  
AFIB 0.921615 0.931644 0.912069 204.0  
GSVT 0.952804 0.948830 0.956965 300.0  
SB 0.972329 0.971459 0.973200 892.0  
SR 0.963140 0.963148 0.963140 681.0  
macro avg 0.952472 0.953770 0.951344 2077.0  
micro avg 0.961552 0.961552 0.961552 2077.0  
weighted avg 0.961515 0.961555 0.961552 2077.0  
The result of Model Number:Dataset Number:Featuregroup Number:Rescale of 3 : 1 : 8 : 1

f1-score precision recall support  
AFIB 0.516723 0.562890 0.545671 204.0  
GSVT 0.701854 0.690381 0.713957 300.0  
SB 0.597494 0.592943 0.602160 892.0  
SR 0.730638 0.722371 0.739118 681.0  
macro avg 0.636678 0.642146 0.650227 2077.0  
micro avg 0.657665 0.657665 0.657665 2077.0  
weighted avg 0.648290 0.646502 0.657665 2077.0  
The result of Model Number:Dataset Number:Featuregroup Number:Rescale of 3 : 1 : 9 : 0

f1-score precision recall support  
AFIB 0.793201 0.818968 0.769157 204.0  
GSVT 0.808238 0.801003 0.815765 300.0  
SB 0.827457 0.821785 0.833209 892.0  
SR 0.813962 0.817396 0.810605 681.0  
macro avg 0.810715 0.814788 0.807184 2077.0  
micro avg 0.816987 0.816987 0.816987 2077.0  
weighted avg 0.816892 0.817068 0.816987 2077.0  
The result of Model Number:Dataset Number:Featuregroup Number:Rescale of 3 : 1 : 9 : 1

f1-score precision recall support  
AFIB 0.702159 0.723611 0.682020 875.0  
GSVT 0.745141 0.742617 0.747747 691.0  
SB 0.814249 0.810978 0.817550 1553.0  
SR 0.771184 0.757808 0.785117 907.0  
macro avg 0.758183 0.758754 0.758109 4026.0  
micro avg 0.768807 0.768807 0.768807 4026.0

weighted avg 0.768324 0.768278 0.768807 4026.0

The result of Model Number:Dataset Number:Featuregroup Number:Rescale of 3 : 1 : 10 :  
0

f1-score precision recall support

|              |          |          |          |        |
|--------------|----------|----------|----------|--------|
| AFIB         | 0.732230 | 0.742011 | 0.722911 | 204.0  |
| GSVT         | 0.745166 | 0.740626 | 0.749875 | 300.0  |
| SB           | 0.763128 | 0.762452 | 0.763811 | 892.0  |
| SR           | 0.757489 | 0.757604 | 0.757379 | 681.0  |
| macro avg    | 0.749503 | 0.750673 | 0.748494 | 2077.0 |
| micro avg    | 0.755672 | 0.755672 | 0.755672 | 2077.0 |
| weighted avg | 0.755650 | 0.755702 | 0.755672 | 2077.0 |

The result of Model Number:Dataset Number:Featuregroup Number:Rescale of 3 : 1 : 10 :  
1

f1-score precision recall support

|              |          |          |          |        |
|--------------|----------|----------|----------|--------|
| AFIB         | 0.674434 | 0.679715 | 0.669269 | 875.0  |
| GSVT         | 0.676212 | 0.667582 | 0.685110 | 691.0  |
| SB           | 0.709270 | 0.706426 | 0.712145 | 1553.0 |
| SR           | 0.694286 | 0.701101 | 0.687627 | 907.0  |
| macro avg    | 0.688550 | 0.688706 | 0.688538 | 4026.0 |
| micro avg    | 0.692663 | 0.692663 | 0.692663 | 4026.0 |
| weighted avg | 0.692649 | 0.692754 | 0.692663 | 4026.0 |

The result of Model Number:Dataset Number:Featuregroup Number:Rescale of 4 : 0 : 0 : 0

f1-score precision recall support

|              |          |          |          |        |
|--------------|----------|----------|----------|--------|
| AFIB         | 0.773062 | 0.779190 | 0.767050 | 875.0  |
| GSVT         | 0.782863 | 0.779412 | 0.786372 | 691.0  |
| SB           | 0.832483 | 0.829191 | 0.835806 | 1553.0 |
| SR           | 0.812026 | 0.814320 | 0.809783 | 907.0  |
| macro avg    | 0.800108 | 0.800528 | 0.799753 | 4026.0 |
| micro avg    | 0.806515 | 0.806515 | 0.806515 | 4026.0 |
| weighted avg | 0.806443 | 0.806430 | 0.806515 | 4026.0 |

The result of Model Number:Dataset Number:Featuregroup Number:Rescale of 4 : 0 : 0 : 1

f1-score precision recall support

|              |          |          |          |        |
|--------------|----------|----------|----------|--------|
| AFIB         | 0.878159 | 0.866947 | 0.889716 | 875.0  |
| GSVT         | 0.893572 | 0.898697 | 0.888530 | 691.0  |
| SB           | 0.956514 | 0.952497 | 0.960575 | 1553.0 |
| SR           | 0.928350 | 0.943376 | 0.913811 | 907.0  |
| macro avg    | 0.914149 | 0.915379 | 0.913158 | 4026.0 |
| micro avg    | 0.922274 | 0.922274 | 0.922274 | 4026.0 |
| weighted avg | 0.922337 | 0.922615 | 0.922274 | 4026.0 |

The result of Model Number:Dataset Number:Featuregroup Number:Rescale of 4 : 0 : 1 : 0

f1-score precision recall support

|      |          |          |          |       |
|------|----------|----------|----------|-------|
| AFIB | 0.617145 | 0.593552 | 0.655966 | 875.0 |
| GSVT | 0.639467 | 0.617397 | 0.669402 | 691.0 |

SB 0.712485 0.699908 0.726304 1553.0  
SR 0.603458 0.725624 0.521005 907.0  
macro avg 0.643139 0.659120 0.643169 4026.0  
micro avg 0.654999 0.654999 0.654999 4026.0  
weighted avg 0.654669 0.668425 0.654999 4026.0

The result of Model Number:Dataset Number:Featuregroup Number:Rescale of 4 : 0 : 1 : 1

f1-score precision recall support

AFIB 0.664921 0.656874 0.673196 875.0  
GSVT 0.673921 0.680831 0.667203 691.0  
SB 0.715773 0.713443 0.718123 1553.0  
SR 0.700117 0.707311 0.693092 907.0  
macro avg 0.688683 0.689615 0.687904 4026.0  
micro avg 0.693980 0.693980 0.693980 4026.0  
weighted avg 0.694011 0.694170 0.693980 4026.0

The result of Model Number:Dataset Number:Featuregroup Number:Rescale of 4 : 0 : 2 : 0

f1-score precision recall support

AFIB 0.648596 0.640255 0.657204 875.0  
GSVT 0.661799 0.667278 0.656437 691.0  
SB 0.707597 0.704447 0.710782 1553.0  
SR 0.687460 0.697628 0.677601 907.0  
macro avg 0.676363 0.677402 0.675506 4026.0  
micro avg 0.682335 0.682335 0.682335 4026.0  
weighted avg 0.682377 0.682580 0.682335 4026.0

The result of Model Number:Dataset Number:Featuregroup Number:Rescale of 4 : 0 : 2 : 1

f1-score precision recall support

AFIB 0.642584 0.647906 0.723783 204.0  
GSVT 0.696839 0.667013 0.786198 300.0  
SB 0.636240 0.634029 0.638468 892.0  
SR 0.629914 0.630033 0.629799 681.0  
macro avg 0.651394 0.644745 0.694562 2077.0  
micro avg 0.665343 0.665343 0.665343 2077.0  
weighted avg 0.643542 0.638846 0.665343 2077.0

The result of Model Number:Dataset Number:Featuregroup Number:Rescale of 4 : 0 : 3 : 0

f1-score precision recall support

AFIB 0.666620 0.657876 0.675630 875.0  
GSVT 0.676826 0.684349 0.669478 691.0  
SB 0.717861 0.716167 0.719568 1553.0  
SR 0.699888 0.706187 0.693710 907.0  
macro avg 0.690299 0.691145 0.689597 4026.0  
micro avg 0.695596 0.695596 0.695596 4026.0  
weighted avg 0.695633 0.695789 0.695596 4026.0

The result of Model Number:Dataset Number:Featuregroup Number:Rescale of 4 : 0 : 3 : 1

f1-score precision recall support

AFIB 0.644225 0.643188 0.645528 875.0  
GSVT 0.659245 0.655809 0.662756 691.0  
SB 0.689275 0.683436 0.695221 1553.0  
SR 0.662963 0.677702 0.649075 907.0  
macro avg 0.663927 0.665034 0.663145 4026.0  
micro avg 0.668453 0.668453 0.668453 4026.0  
weighted avg 0.668402 0.668655 0.668453 4026.0

The result of Model Number:Dataset Number:Featuregroup Number:Rescale of 4 : 0 : 4 : 0

f1-score precision recall support

AFIB 0.673703 0.665101 0.682569 875.0  
GSVT 0.685528 0.689459 0.681659 691.0  
SB 0.733815 0.730733 0.736930 1553.0  
SR 0.712208 0.723736 0.701054 907.0  
macro avg 0.701313 0.702257 0.700553 4026.0  
micro avg 0.707547 0.707547 0.707547 4026.0  
weighted avg 0.707595 0.707808 0.707547 4026.0

The result of Model Number:Dataset Number:Featuregroup Number:Rescale of 4 : 0 : 4 : 1

f1-score precision recall support

AFIB 0.702998 0.778750 0.641240 204.0  
GSVT 0.828650 0.817035 0.840814 300.0  
SB 0.879826 0.876994 0.882686 892.0  
SR 0.857300 0.844260 0.870772 681.0  
macro avg 0.817194 0.829260 0.808878 2077.0  
micro avg 0.849017 0.849017 0.849017 2077.0  
weighted avg 0.847681 0.847951 0.849017 2077.0

The result of Model Number:Dataset Number:Featuregroup Number:Rescale of 4 : 0 : 5 : 0

f1-score precision recall support

AFIB 0.733480 0.818058 0.664849 204.0  
GSVT 0.864848 0.849795 0.880628 300.0  
SB 0.923390 0.919297 0.927530 892.0  
SR 0.901962 0.889629 0.914669 681.0  
macro avg 0.855920 0.869195 0.846919 2077.0  
micro avg 0.890738 0.890738 0.890738 2077.0  
weighted avg 0.889256 0.889587 0.890738 2077.0

The result of Model Number:Dataset Number:Featuregroup Number:Rescale of 4 : 0 : 5 : 1

f1-score precision recall support

AFIB 0.713436 0.713943 0.712943 875.0  
GSVT 0.723049 0.724475 0.721691 691.0  
SB 0.768000 0.765448 0.770572 1553.0  
SR 0.749954 0.752742 0.747212 907.0  
macro avg 0.738610 0.739152 0.738104 4026.0  
micro avg 0.744395 0.744395 0.744395 4026.0  
weighted avg 0.744361 0.744359 0.744395 4026.0

The result of Model Number:Dataset Number:Featuregroup Number:Rescale of 4 : 0 : 6 : 0

|              | f1-score | precision | recall   | support |
|--------------|----------|-----------|----------|---------|
| AFIB         | 0.840055 | 0.905529  | 0.783800 | 204.0   |
| GSVT         | 0.865672 | 0.880326  | 0.851535 | 300.0   |
| SB           | 0.917450 | 0.909006  | 0.926080 | 892.0   |
| SR           | 0.880934 | 0.868160  | 0.894131 | 681.0   |
| macro avg    | 0.876028 | 0.890755  | 0.863887 | 2077.0  |
| micro avg    | 0.890863 | 0.890863  | 0.890863 | 2077.0  |
| weighted avg | 0.890397 | 0.891129  | 0.890863 | 2077.0  |

The result of Model Number:Dataset Number:Featuregroup Number:Rescale of 4 : 0 : 6 : 1

|              | f1-score | precision | recall   | support |
|--------------|----------|-----------|----------|---------|
| AFIB         | 0.669328 | 0.663053  | 0.675808 | 875.0   |
| GSVT         | 0.634587 | 0.619334  | 0.681236 | 691.0   |
| SB           | 0.733781 | 0.731087  | 0.736516 | 1553.0  |
| SR           | 0.570722 | 0.574724  | 0.566783 | 907.0   |
| macro avg    | 0.652105 | 0.647050  | 0.665086 | 4026.0  |
| micro avg    | 0.675596 | 0.675596  | 0.675596 | 4026.0  |
| weighted avg | 0.666013 | 0.661894  | 0.675596 | 4026.0  |

The result of Model Number:Dataset Number:Featuregroup Number:Rescale of 4 : 0 : 7 : 0

|              | f1-score | precision | recall   | support |
|--------------|----------|-----------|----------|---------|
| AFIB         | 0.728959 | 0.724368  | 0.821122 | 204.0   |
| GSVT         | 0.888613 | 0.884042  | 0.893381 | 300.0   |
| SB           | 0.913914 | 0.909566  | 0.918315 | 892.0   |
| SR           | 0.716863 | 0.719225  | 0.714949 | 681.0   |
| macro avg    | 0.812087 | 0.809300  | 0.836941 | 2077.0  |
| micro avg    | 0.838488 | 0.838488  | 0.838488 | 2077.0  |
| weighted avg | 0.827485 | 0.825281  | 0.838488 | 2077.0  |

The result of Model Number:Dataset Number:Featuregroup Number:Rescale of 4 : 0 : 7 : 1

|              | f1-score | precision | recall   | support |
|--------------|----------|-----------|----------|---------|
| AFIB         | 0.874411 | 0.885746  | 0.863595 | 204.0   |
| GSVT         | 0.908245 | 0.907658  | 0.908860 | 300.0   |
| SB           | 0.927383 | 0.925424  | 0.929356 | 892.0   |
| SR           | 0.918055 | 0.917534  | 0.918597 | 681.0   |
| macro avg    | 0.907024 | 0.909091  | 0.905102 | 2077.0  |
| micro avg    | 0.916409 | 0.916409  | 0.916409 | 2077.0  |
| weighted avg | 0.916357 | 0.916374  | 0.916409 | 2077.0  |

The result of Model Number:Dataset Number:Featuregroup Number:Rescale of 4 : 0 : 8 : 0

|           | f1-score | precision | recall   | support |
|-----------|----------|-----------|----------|---------|
| AFIB      | 0.874674 | 0.897573  | 0.853314 | 204.0   |
| GSVT      | 0.823008 | 0.846927  | 0.800851 | 300.0   |
| SB        | 0.868449 | 0.837873  | 0.901358 | 892.0   |
| SR        | 0.787143 | 0.812778  | 0.763235 | 681.0   |
| macro avg | 0.838319 | 0.848788  | 0.829689 | 2077.0  |



micro avg 0.836834 0.836834 0.836834 2077.0  
weighted avg 0.835839 0.836816 0.836834 2077.0  
The result of Model Number:Dataset Number:Featuregroup Number:Rescale of 4 : 0 : 8 : 1

|              | f1-score | precision | recall   | support |
|--------------|----------|-----------|----------|---------|
| AFIB         | 0.768705 | 0.751236  | 0.787059 | 875.0   |
| GSVT         | 0.795049 | 0.807942  | 0.782626 | 691.0   |
| SB           | 0.848231 | 0.848236  | 0.848231 | 1553.0  |
| SR           | 0.826521 | 0.835937  | 0.817317 | 907.0   |
| macro avg    | 0.809626 | 0.810838  | 0.808808 | 4026.0  |
| micro avg    | 0.816711 | 0.816711  | 0.816711 | 4026.0  |
| weighted avg | 0.816928 | 0.817468  | 0.816711 | 4026.0  |

The result of Model Number:Dataset Number:Featuregroup Number:Rescale of 4 : 0 : 9 : 0

|              | f1-score | precision | recall   | support |
|--------------|----------|-----------|----------|---------|
| AFIB         | 0.670269 | 0.683257  | 0.658066 | 204.0   |
| GSVT         | 0.696260 | 0.690438  | 0.702309 | 300.0   |
| SB           | 0.709252 | 0.707828  | 0.710683 | 892.0   |
| SR           | 0.702489 | 0.703217  | 0.701766 | 681.0   |
| macro avg    | 0.694567 | 0.696185  | 0.693206 | 2077.0  |
| micro avg    | 0.701382 | 0.701382  | 0.701382 | 2077.0  |
| weighted avg | 0.701329 | 0.701391  | 0.701382 | 2077.0  |

The result of Model Number:Dataset Number:Featuregroup Number:Rescale of 4 : 0 : 9 : 1

|              | f1-score | precision | recall   | support |
|--------------|----------|-----------|----------|---------|
| AFIB         | 0.841106 | 0.879087  | 0.806545 | 204.0   |
| GSVT         | 0.870361 | 0.860586  | 0.880518 | 300.0   |
| SB           | 0.837254 | 0.800752  | 0.895874 | 892.0   |
| SR           | 0.697548 | 0.703495  | 0.691818 | 681.0   |
| macro avg    | 0.811567 | 0.810980  | 0.818689 | 2077.0  |
| micro avg    | 0.817977 | 0.817977  | 0.817977 | 2077.0  |
| weighted avg | 0.796608 | 0.785200  | 0.817977 | 2077.0  |

The result of Model Number:Dataset Number:Featuregroup Number:Rescale of 4 : 0 : 10 : 0

|              | f1-score | precision | recall   | support |
|--------------|----------|-----------|----------|---------|
| AFIB         | 0.666631 | 0.679474  | 0.654580 | 204.0   |
| GSVT         | 0.679150 | 0.668115  | 0.690679 | 300.0   |
| SB           | 0.690488 | 0.682253  | 0.698926 | 892.0   |
| SR           | 0.677643 | 0.690348  | 0.665409 | 681.0   |
| macro avg    | 0.678478 | 0.680047  | 0.677398 | 2077.0  |
| micro avg    | 0.682390 | 0.682390  | 0.682390 | 2077.0  |
| weighted avg | 0.682296 | 0.682592  | 0.682390 | 2077.0  |

The result of Model Number:Dataset Number:Featuregroup Number:Rescale of 4 : 0 : 10 : 1

|      | f1-score | precision | recall   | support |
|------|----------|-----------|----------|---------|
| AFIB | 0.766052 | 0.749682  | 0.783197 | 875.0   |

GSVT 0.793295 0.805426 0.781595 691.0  
SB 0.845651 0.845763 0.845543 1553.0  
SR 0.823865 0.832397 0.815509 907.0  
macro avg 0.807216 0.808317 0.806461 4026.0  
micro avg 0.814251 0.814251 0.814251 4026.0  
weighted avg 0.814457 0.814946 0.814251 4026.0  
The result of Model Number:Dataset Number:Featuregroup Number:Rescale of 4 : 1 : 0 : 0

f1-score precision recall support  
AFIB 0.712194 0.785398 0.651910 204.0  
GSVT 0.847490 0.836037 0.859345 300.0  
SB 0.902516 0.898907 0.906158 892.0  
SR 0.878021 0.866152 0.890257 681.0  
macro avg 0.835055 0.846623 0.826918 2077.0  
micro avg 0.869211 0.869211 0.869211 2077.0  
weighted avg 0.867844 0.867938 0.869211 2077.0  
The result of Model Number:Dataset Number:Featuregroup Number:Rescale of 4 : 1 : 0 : 1

f1-score precision recall support  
AFIB 0.859406 0.867138 0.852079 875.0  
GSVT 0.876912 0.859131 0.895651 691.0  
SB 0.929971 0.919625 0.940664 1553.0  
SR 0.893068 0.919615 0.868221 907.0  
macro avg 0.889839 0.891377 0.889154 4026.0  
micro avg 0.897365 0.897365 0.897365 4026.0  
weighted avg 0.897214 0.897833 0.897365 4026.0  
The result of Model Number:Dataset Number:Featuregroup Number:Rescale of 4 : 1 : 1 : 0

f1-score precision recall support  
AFIB 0.801877 0.783655 0.821023 875.0  
GSVT 0.829359 0.842808 0.816400 691.0  
SB 0.884835 0.884841 0.884836 1553.0  
SR 0.862189 0.872011 0.852587 907.0  
macro avg 0.844565 0.845829 0.843712 4026.0  
micro avg 0.851956 0.851956 0.851956 4026.0  
weighted avg 0.852182 0.852745 0.851956 4026.0  
The result of Model Number:Dataset Number:Featuregroup Number:Rescale of 4 : 1 : 1 : 1

f1-score precision recall support  
AFIB 0.833009 0.851307 0.815793 204.0  
GSVT 0.859855 0.852906 0.867037 300.0  
SB 0.877876 0.876796 0.878959 892.0  
SR 0.870465 0.869708 0.871229 681.0  
macro avg 0.860301 0.862679 0.858255 2077.0  
micro avg 0.868499 0.868499 0.868499 2077.0  
weighted avg 0.868437 0.868518 0.868499 2077.0  
The result of Model Number:Dataset Number:Featuregroup Number:Rescale of 4 : 1 : 2 : 0

f1-score precision recall support  
AFIB 0.648997 0.639789 0.658489 875.0  
GSVT 0.662349 0.668805 0.656022 691.0  
SB 0.704868 0.702571 0.707182 1553.0  
SR 0.688407 0.697206 0.679836 907.0  
macro avg 0.676155 0.677093 0.675382 4026.0  
micro avg 0.681658 0.681658 0.681658 4026.0  
weighted avg 0.681719 0.681922 0.681658 4026.0

The result of Model Number:Dataset Number:Featuregroup Number:Rescale of 4 : 1 : 2 : 1

f1-score precision recall support  
AFIB 0.889298 0.897372 0.881824 204.0  
GSVT 0.918690 0.913138 0.924550 300.0  
SB 0.937910 0.936653 0.939171 892.0  
SR 0.929232 0.931158 0.927319 681.0  
macro avg 0.918782 0.919580 0.918216 2077.0  
micro avg 0.927541 0.927541 0.927541 2077.0  
weighted avg 0.927514 0.927597 0.927541 2077.0

The result of Model Number:Dataset Number:Featuregroup Number:Rescale of 4 : 1 : 3 : 0

f1-score precision recall support  
AFIB 0.795935 0.797188 0.794788 204.0  
GSVT 0.815184 0.813912 0.816528 300.0  
SB 0.832000 0.830985 0.833024 892.0  
SR 0.826174 0.827759 0.824598 681.0  
macro avg 0.817323 0.817461 0.817235 2077.0  
micro avg 0.824123 0.824123 0.824123 2077.0  
weighted avg 0.824119 0.824142 0.824123 2077.0

The result of Model Number:Dataset Number:Featuregroup Number:Rescale of 4 : 1 : 3 : 1

f1-score precision recall support  
AFIB 0.614795 0.627715 0.602420 875.0  
GSVT 0.654684 0.656933 0.652483 691.0  
SB 0.713288 0.709926 0.716685 1553.0  
SR 0.675207 0.666215 0.684501 907.0  
macro avg 0.664493 0.665197 0.664022 4026.0  
micro avg 0.673581 0.673581 0.673581 4026.0  
weighted avg 0.673244 0.673116 0.673581 4026.0

The result of Model Number:Dataset Number:Featuregroup Number:Rescale of 4 : 1 : 4 : 0

f1-score precision recall support  
AFIB 0.827472 0.864837 0.793472 204.0  
GSVT 0.856252 0.846636 0.866245 300.0  
SB 0.823683 0.787772 0.881352 892.0  
SR 0.686241 0.692092 0.680604 681.0  
macro avg 0.798412 0.797834 0.805418 2077.0  
micro avg 0.804718 0.804718 0.804718 2077.0

weighted avg 0.783695 0.772472 0.804718 2077.0

The result of Model Number:Dataset Number:Featuregroup Number:Rescale of 4 : 1 : 4 : 1

f1-score precision recall support

|              |          |          |          |        |
|--------------|----------|----------|----------|--------|
| AFIB         | 0.793206 | 0.800960 | 0.785786 | 875.0  |
| GSVT         | 0.787147 | 0.781174 | 0.793470 | 691.0  |
| SB           | 0.832891 | 0.824321 | 0.841714 | 1553.0 |
| SR           | 0.806454 | 0.819423 | 0.794116 | 907.0  |
| macro avg    | 0.804924 | 0.806470 | 0.803771 | 4026.0 |
| micro avg    | 0.810555 | 0.810555 | 0.810555 | 4026.0 |
| weighted avg | 0.810459 | 0.810735 | 0.810555 | 4026.0 |

The result of Model Number:Dataset Number:Featuregroup Number:Rescale of 4 : 1 : 5 : 0

f1-score precision recall support

|              |          |          |          |        |
|--------------|----------|----------|----------|--------|
| AFIB         | 0.839272 | 0.857968 | 0.821615 | 204.0  |
| GSVT         | 0.849626 | 0.837183 | 0.862799 | 300.0  |
| SB           | 0.868826 | 0.860191 | 0.877673 | 892.0  |
| SR           | 0.852799 | 0.865048 | 0.840918 | 681.0  |
| macro avg    | 0.852631 | 0.855098 | 0.850751 | 2077.0 |
| micro avg    | 0.857968 | 0.857968 | 0.857968 | 2077.0 |
| weighted avg | 0.857895 | 0.858242 | 0.857968 | 2077.0 |

The result of Model Number:Dataset Number:Featuregroup Number:Rescale of 4 : 1 : 5 : 1

f1-score precision recall support

|              |          |          |          |        |
|--------------|----------|----------|----------|--------|
| AFIB         | 0.665517 | 0.672912 | 0.658624 | 204.0  |
| GSVT         | 0.686132 | 0.682226 | 0.690282 | 300.0  |
| SB           | 0.699782 | 0.698844 | 0.700723 | 892.0  |
| SR           | 0.693829 | 0.694758 | 0.692911 | 681.0  |
| macro avg    | 0.686315 | 0.687185 | 0.685635 | 2077.0 |
| micro avg    | 0.692519 | 0.692519 | 0.692519 | 2077.0 |
| weighted avg | 0.692493 | 0.692557 | 0.692519 | 2077.0 |

The result of Model Number:Dataset Number:Featuregroup Number:Rescale of 4 : 1 : 6 : 0

f1-score precision recall support

|              |          |          |          |        |
|--------------|----------|----------|----------|--------|
| AFIB         | 0.846988 | 0.865829 | 0.829131 | 204.0  |
| GSVT         | 0.883074 | 0.877587 | 0.888665 | 300.0  |
| SB           | 0.902244 | 0.900344 | 0.904163 | 892.0  |
| SR           | 0.892634 | 0.892003 | 0.893294 | 681.0  |
| macro avg    | 0.881235 | 0.883940 | 0.878813 | 2077.0 |
| micro avg    | 0.890991 | 0.890991 | 0.890991 | 2077.0 |
| weighted avg | 0.890897 | 0.890932 | 0.890991 | 2077.0 |

The result of Model Number:Dataset Number:Featuregroup Number:Rescale of 4 : 1 : 6 : 1

f1-score precision recall support

|      |          |          |          |       |
|------|----------|----------|----------|-------|
| AFIB | 0.819815 | 0.835701 | 0.804890 | 204.0 |
| GSVT | 0.851606 | 0.844485 | 0.859005 | 300.0 |
| SB   | 0.867496 | 0.865755 | 0.869246 | 892.0 |
| SR   | 0.859224 | 0.860114 | 0.858340 | 681.0 |

macro avg 0.849535 0.851514 0.847870 2077.0  
micro avg 0.857870 0.857870 0.857870 2077.0  
weighted avg 0.857806 0.857882 0.857870 2077.0

The result of Model Number:Dataset Number:Featuregroup Number:Rescale of 4 : 1 : 7 : 0

f1-score precision recall support  
AFIB 0.758591 0.762350 0.754950 875.0  
GSVT 0.766144 0.767248 0.765159 691.0  
SB 0.806470 0.802728 0.810255 1553.0  
SR 0.791624 0.793606 0.789695 907.0  
macro avg 0.780707 0.781483 0.780015 4026.0  
micro avg 0.785863 0.785863 0.785863 4026.0  
weighted avg 0.785798 0.785808 0.785863 4026.0

The result of Model Number:Dataset Number:Featuregroup Number:Rescale of 4 : 1 : 7 : 1

f1-score precision recall support  
AFIB 0.834841 0.880254 0.794097 204.0  
GSVT 0.876429 0.863173 0.890133 300.0  
SB 0.897256 0.891419 0.903183 892.0  
SR 0.886186 0.886985 0.885410 681.0  
macro avg 0.873678 0.880458 0.868206 2077.0  
micro avg 0.884757 0.884757 0.884757 2077.0  
weighted avg 0.884488 0.884789 0.884757 2077.0

The result of Model Number:Dataset Number:Featuregroup Number:Rescale of 4 : 1 : 8 : 0

f1-score precision recall support  
AFIB 0.824715 0.829241 0.820290 875.0  
GSVT 0.825868 0.815427 0.836710 691.0  
SB 0.868543 0.865058 0.872064 1553.0  
SR 0.849898 0.860216 0.839878 907.0  
macro avg 0.842256 0.842485 0.842236 4026.0  
micro avg 0.847493 0.847493 0.847493 4026.0  
weighted avg 0.847493 0.847664 0.847493 4026.0

The result of Model Number:Dataset Number:Featuregroup Number:Rescale of 4 : 1 : 8 : 1

f1-score precision recall support  
AFIB 0.817022 0.820895 0.813190 875.0  
GSVT 0.827157 0.823254 0.831115 691.0  
SB 0.872457 0.870616 0.874311 1553.0  
SR 0.855924 0.858321 0.853561 907.0  
macro avg 0.843140 0.843271 0.843044 4026.0  
micro avg 0.848939 0.848939 0.848939 4026.0  
weighted avg 0.848909 0.848911 0.848939 4026.0

The result of Model Number:Dataset Number:Featuregroup Number:Rescale of 4 : 1 : 9 : 0

f1-score precision recall support  
AFIB 0.731597 0.736380 0.726920 204.0  
GSVT 0.749926 0.748199 0.751671 300.0

SB 0.763313 0.762211 0.764423 892.0  
SR 0.757297 0.758088 0.756521 681.0  
macro avg 0.750533 0.751220 0.749884 2077.0  
micro avg 0.756307 0.756307 0.756307 2077.0  
weighted avg 0.756292 0.756299 0.756307 2077.0

The result of Model Number:Dataset Number:Featuregroup Number:Rescale of 4 : 1 : 9 : 1

f1-score precision recall support

AFIB 0.699335 0.716076 0.684384 204.0  
GSVT 0.719929 0.709785 0.730668 300.0  
SB 0.738635 0.731131 0.746329 892.0  
SR 0.720981 0.731391 0.710920 681.0  
macro avg 0.719720 0.722096 0.718075 2077.0  
micro avg 0.726373 0.726373 0.726373 2077.0  
weighted avg 0.726285 0.726654 0.726373 2077.0

The result of Model Number:Dataset Number:Featuregroup Number:Rescale of 4 : 1 : 10 : 0

f1-score precision recall support

AFIB 0.681167 0.754744 0.620786 204.0  
GSVT 0.789618 0.776776 0.803016 300.0  
SB 0.842079 0.838245 0.845949 892.0  
SR 0.821732 0.811276 0.832474 681.0  
macro avg 0.783649 0.795260 0.775556 2077.0  
micro avg 0.813215 0.813215 0.813215 2077.0  
weighted avg 0.812026 0.812323 0.813215 2077.0

The result of Model Number:Dataset Number:Featuregroup Number:Rescale of 4 : 1 : 10 : 1

f1-score precision recall support

AFIB 0.844401 0.849018 0.839861 875.0  
GSVT 0.840377 0.833291 0.847668 691.0  
SB 0.883866 0.875496 0.892402 1553.0  
SR 0.850971 0.866845 0.835680 907.0  
macro avg 0.854904 0.856163 0.853903 4026.0  
micro avg 0.860526 0.860526 0.860526 4026.0  
weighted avg 0.860414 0.860549 0.860526 4026.0

The result of Model Number:Dataset Number:Featuregroup Number:Rescale of 5 : 0 : 0 : 0

f1-score precision recall support

AFIB 0.748703 0.748028 0.749451 875.0  
GSVT 0.761673 0.754699 0.768837 691.0  
SB 0.799285 0.792258 0.806439 1553.0  
SR 0.761656 0.780485 0.743780 907.0  
macro avg 0.767829 0.768868 0.767127 4026.0  
micro avg 0.773483 0.773483 0.773483 4026.0  
weighted avg 0.773359 0.773547 0.773483 4026.0

The result of Model Number:Dataset Number:Featuregroup Number:Rescale of 5 : 0 : 0 : 1

|              | f1-score | precision | recall   | support |
|--------------|----------|-----------|----------|---------|
| AFIB         | 0.703666 | 0.694436  | 0.713177 | 875.0   |
| GSVT         | 0.714439 | 0.722380  | 0.706683 | 691.0   |
| SB           | 0.757755 | 0.755966  | 0.759556 | 1553.0  |
| SR           | 0.738783 | 0.745432  | 0.732262 | 907.0   |
| macro avg    | 0.728661 | 0.729554  | 0.727919 | 4026.0  |
| micro avg    | 0.734252 | 0.734252  | 0.734252 | 4026.0  |
| weighted avg | 0.734291 | 0.734456  | 0.734252 | 4026.0  |

The result of Model Number:Dataset Number:Featuregroup Number:Rescale of 5 : 0 : 1 : 0

|              | f1-score | precision | recall   | support |
|--------------|----------|-----------|----------|---------|
| AFIB         | 0.653742 | 0.722867  | 0.597023 | 204.0   |
| GSVT         | 0.752215 | 0.743510  | 0.761271 | 300.0   |
| SB           | 0.795301 | 0.792031  | 0.798600 | 892.0   |
| SR           | 0.778222 | 0.766695  | 0.790109 | 681.0   |
| macro avg    | 0.744870 | 0.756276  | 0.736751 | 2077.0  |
| micro avg    | 0.770626 | 0.770626  | 0.770626 | 2077.0  |
| weighted avg | 0.769574 | 0.769922  | 0.770626 | 2077.0  |

The result of Model Number:Dataset Number:Featuregroup Number:Rescale of 5 : 0 : 1 : 1

|              | f1-score | precision | recall   | support |
|--------------|----------|-----------|----------|---------|
| AFIB         | 0.837360 | 0.826943  | 0.848136 | 875.0   |
| GSVT         | 0.863576 | 0.874390  | 0.853112 | 691.0   |
| SB           | 0.921315 | 0.920317  | 0.922322 | 1553.0  |
| SR           | 0.896466 | 0.901063  | 0.891920 | 907.0   |
| macro avg    | 0.879679 | 0.880678  | 0.878872 | 4026.0  |
| micro avg    | 0.887471 | 0.887471  | 0.887471 | 4026.0  |
| weighted avg | 0.887560 | 0.887803  | 0.887471 | 4026.0  |

The result of Model Number:Dataset Number:Featuregroup Number:Rescale of 5 : 0 : 2 : 0

|              | f1-score | precision | recall   | support |
|--------------|----------|-----------|----------|---------|
| AFIB         | 0.687223 | 0.688414  | 0.686047 | 875.0   |
| GSVT         | 0.695556 | 0.687563  | 0.703793 | 691.0   |
| SB           | 0.732444 | 0.723612  | 0.741497 | 1553.0  |
| SR           | 0.697629 | 0.718767  | 0.677715 | 907.0   |
| macro avg    | 0.703213 | 0.704589  | 0.702263 | 4026.0  |
| micro avg    | 0.708605 | 0.708605  | 0.708605 | 4026.0  |
| weighted avg | 0.708441 | 0.708684  | 0.708605 | 4026.0  |

The result of Model Number:Dataset Number:Featuregroup Number:Rescale of 5 : 0 : 2 : 1

|           | f1-score | precision | recall   | support |
|-----------|----------|-----------|----------|---------|
| AFIB      | 0.640616 | 0.690546  | 0.597717 | 204.0   |
| GSVT      | 0.660152 | 0.671327  | 0.649371 | 300.0   |
| SB        | 0.699637 | 0.693197  | 0.706218 | 892.0   |
| SR        | 0.671790 | 0.662048  | 0.681854 | 681.0   |
| macro avg | 0.668049 | 0.679280  | 0.658790 | 2077.0  |

micro avg 0.679362 0.679362 0.679362 2077.0  
weighted avg 0.679006 0.679565 0.679362 2077.0  
The result of Model Number:Dataset Number:Featuregroup Number:Rescale of 5 : 0 : 3 : 0

|              | f1-score | precision | recall   | support |
|--------------|----------|-----------|----------|---------|
| AFIB         | 0.903176 | 0.921373  | 0.886264 | 204.0   |
| GSVT         | 0.932157 | 0.924670  | 0.939945 | 300.0   |
| SB           | 0.952337 | 0.951378  | 0.953298 | 892.0   |
| SR           | 0.943656 | 0.943114  | 0.944209 | 681.0   |
| macro avg    | 0.932831 | 0.935134  | 0.930929 | 2077.0  |
| micro avg    | 0.941805 | 0.941805  | 0.941805 | 2077.0  |
| weighted avg | 0.941747 | 0.941864  | 0.941805 | 2077.0  |

The result of Model Number:Dataset Number:Featuregroup Number:Rescale of 5 : 0 : 3 : 1

|              | f1-score | precision | recall   | support |
|--------------|----------|-----------|----------|---------|
| AFIB         | 0.786806 | 0.777526  | 0.796351 | 875.0   |
| GSVT         | 0.800135 | 0.805198  | 0.795164 | 691.0   |
| SB           | 0.853098 | 0.851951  | 0.854252 | 1553.0  |
| SR           | 0.832140 | 0.840023  | 0.824431 | 907.0   |
| macro avg    | 0.818045 | 0.818674  | 0.817549 | 4026.0  |
| micro avg    | 0.824808 | 0.824808  | 0.824808 | 4026.0  |
| weighted avg | 0.824879 | 0.825064  | 0.824808 | 4026.0  |

The result of Model Number:Dataset Number:Featuregroup Number:Rescale of 5 : 0 : 4 : 0

|              | f1-score | precision | recall   | support |
|--------------|----------|-----------|----------|---------|
| AFIB         | 0.585311 | 0.581625  | 0.659312 | 204.0   |
| GSVT         | 0.713504 | 0.709834  | 0.717332 | 300.0   |
| SB           | 0.733819 | 0.730328  | 0.737353 | 892.0   |
| SR           | 0.575599 | 0.577495  | 0.574062 | 681.0   |
| macro avg    | 0.652058 | 0.649820  | 0.672015 | 2077.0  |
| micro avg    | 0.673257 | 0.673257  | 0.673257 | 2077.0  |
| weighted avg | 0.664422 | 0.662652  | 0.673257 | 2077.0  |

The result of Model Number:Dataset Number:Featuregroup Number:Rescale of 5 : 0 : 4 : 1

|              | f1-score | precision | recall   | support |
|--------------|----------|-----------|----------|---------|
| AFIB         | 0.680706 | 0.675291  | 0.686273 | 875.0   |
| GSVT         | 0.653716 | 0.641286  | 0.666691 | 691.0   |
| SB           | 0.686098 | 0.633328  | 0.748473 | 1553.0  |
| SR           | 0.525361 | 0.671751  | 0.431455 | 907.0   |
| macro avg    | 0.636470 | 0.655414  | 0.633223 | 4026.0  |
| micro avg    | 0.649498 | 0.649498  | 0.649498 | 4026.0  |
| weighted avg | 0.643157 | 0.652470  | 0.649498 | 4026.0  |

The result of Model Number:Dataset Number:Featuregroup Number:Rescale of 5 : 0 : 5 : 0

|      | f1-score | precision | recall   | support |
|------|----------|-----------|----------|---------|
| AFIB | 0.833369 | 0.850678  | 0.816943 | 875.0   |
| GSVT | 0.812701 | 0.784474  | 0.879041 | 691.0   |
| SB   | 0.957895 | 0.953576  | 0.962270 | 1553.0  |



SR 0.728237 0.716480 0.740453 907.0  
macro avg 0.833051 0.826302 0.849677 4026.0  
micro avg 0.866428 0.866428 0.866428 4026.0  
weighted avg 0.854172 0.848774 0.866428 4026.0

The result of Model Number:Dataset Number:Featuregroup Number:Rescale of 5 : 0 : 5 : 1

f1-score precision recall support  
AFIB 0.683796 0.709148 0.660292 204.0  
GSVT 0.704282 0.695476 0.713403 300.0  
SB 0.722141 0.715552 0.728859 892.0  
SR 0.703156 0.708612 0.697789 681.0  
macro avg 0.703344 0.707197 0.700086 2077.0  
micro avg 0.709705 0.709705 0.709705 2077.0  
weighted avg 0.709570 0.709748 0.709705 2077.0

The result of Model Number:Dataset Number:Featuregroup Number:Rescale of 5 : 0 : 6 : 0

f1-score precision recall support  
AFIB 0.733804 0.724591 0.743467 875.0  
GSVT 0.680824 0.701437 0.663665 691.0  
SB 0.733016 0.678934 0.798397 1553.0  
SR 0.569943 0.697567 0.486002 907.0  
macro avg 0.679397 0.700632 0.672883 4026.0  
micro avg 0.692956 0.692956 0.692956 4026.0  
weighted avg 0.687491 0.696917 0.692956 4026.0

The result of Model Number:Dataset Number:Featuregroup Number:Rescale of 5 : 0 : 6 : 1

f1-score precision recall support  
AFIB 0.614883 0.681141 0.560867 204.0  
GSVT 0.724787 0.714628 0.735426 300.0  
SB 0.769548 0.767071 0.772050 892.0  
SR 0.749846 0.738440 0.761628 681.0  
macro avg 0.714766 0.725320 0.707493 2077.0  
micro avg 0.742601 0.742601 0.742601 2077.0  
weighted avg 0.741432 0.741669 0.742601 2077.0

The result of Model Number:Dataset Number:Featuregroup Number:Rescale of 5 : 0 : 7 : 0

f1-score precision recall support  
AFIB 0.721700 0.800939 0.656901 204.0  
GSVT 0.842682 0.832147 0.853653 300.0  
SB 0.896572 0.891997 0.901195 892.0  
SR 0.875569 0.863328 0.888166 681.0  
macro avg 0.834131 0.847103 0.824979 2077.0  
micro avg 0.866062 0.866062 0.866062 2077.0  
weighted avg 0.864726 0.865009 0.866062 2077.0

The result of Model Number:Dataset Number:Featuregroup Number:Rescale of 5 : 0 : 7 : 1

f1-score precision recall support  
AFIB 0.780722 0.798558 0.763863 204.0

GSVT 0.816189 0.811108 0.821354 300.0  
SB 0.833816 0.831230 0.836430 892.0  
SR 0.824267 0.824648 0.823908 681.0  
macro avg 0.813748 0.816386 0.811389 2077.0  
micro avg 0.823020 0.823020 0.823020 2077.0  
weighted avg 0.822924 0.822957 0.823020 2077.0

The result of Model Number:Dataset Number:Featuregroup Number:Rescale of 5 : 0 : 8 : 0

f1-score precision recall support

AFIB 0.896044 0.923642 0.870227 204.0  
GSVT 0.918903 0.907654 0.930535 300.0  
SB 0.943862 0.938254 0.949569 892.0  
SR 0.927953 0.932529 0.923457 681.0  
macro avg 0.921691 0.925520 0.918447 2077.0  
micro avg 0.930466 0.930466 0.930466 2077.0  
weighted avg 0.930344 0.930522 0.930466 2077.0

The result of Model Number:Dataset Number:Featuregroup Number:Rescale of 5 : 0 : 8 : 1

f1-score precision recall support

AFIB 0.682942 0.687819 0.678257 204.0  
GSVT 0.706823 0.706367 0.707292 300.0  
SB 0.720965 0.719365 0.722579 892.0  
SR 0.714520 0.715384 0.713680 681.0  
macro avg 0.706312 0.707234 0.705452 2077.0  
micro avg 0.713100 0.713100 0.713100 2077.0  
weighted avg 0.713074 0.713084 0.713100 2077.0

The result of Model Number:Dataset Number:Featuregroup Number:Rescale of 5 : 0 : 9 : 0

f1-score precision recall support

AFIB 0.683982 0.673759 0.694545 875.0  
GSVT 0.697096 0.703058 0.691246 691.0  
SB 0.744831 0.742266 0.747418 1553.0  
SR 0.723030 0.733814 0.712583 907.0  
macro avg 0.712235 0.713224 0.711448 4026.0  
micro avg 0.718438 0.718438 0.718438 4026.0  
weighted avg 0.718502 0.718743 0.718438 4026.0

The result of Model Number:Dataset Number:Featuregroup Number:Rescale of 5 : 0 : 9 : 1

f1-score precision recall support

AFIB 0.634668 0.625852 0.643797 875.0  
GSVT 0.657348 0.666117 0.648892 691.0  
SB 0.698317 0.696886 0.699756 1553.0  
SR 0.680142 0.685397 0.674967 907.0  
macro avg 0.667619 0.668563 0.666853 4026.0  
micro avg 0.673279 0.673279 0.673279 4026.0  
weighted avg 0.673357 0.673579 0.673279 4026.0

The result of Model Number:Dataset Number:Featuregroup Number:Rescale of 5 : 0 : 10 : 0

|              | f1-score | precision | recall   | support |
|--------------|----------|-----------|----------|---------|
| AFIB         | 0.845734 | 0.881981  | 0.812670 | 204.0   |
| GSVT         | 0.874154 | 0.860946  | 0.887829 | 300.0   |
| SB           | 0.891492 | 0.882675  | 0.900489 | 892.0   |
| SR           | 0.867339 | 0.874759  | 0.860076 | 681.0   |
| macro avg    | 0.869680 | 0.875090  | 0.865266 | 2077.0  |
| micro avg    | 0.876784 | 0.876784  | 0.876784 | 2077.0  |
| weighted avg | 0.876574 | 0.876873  | 0.876784 | 2077.0  |

The result of Model Number:Dataset Number:Featuregroup Number:Rescale of 5 : 0 : 10 : 1

|              | f1-score | precision | recall   | support |
|--------------|----------|-----------|----------|---------|
| AFIB         | 0.571556 | 0.623321  | 0.528682 | 204.0   |
| GSVT         | 0.663395 | 0.655815  | 0.671357 | 300.0   |
| SB           | 0.703491 | 0.701690  | 0.705305 | 892.0   |
| SR           | 0.686267 | 0.676974  | 0.695838 | 681.0   |
| macro avg    | 0.656177 | 0.664450  | 0.650296 | 2077.0  |
| micro avg    | 0.679950 | 0.679950  | 0.679950 | 2077.0  |
| weighted avg | 0.679094 | 0.679263  | 0.679950 | 2077.0  |

The result of Model Number:Dataset Number:Featuregroup Number:Rescale of 5 : 1 : 0 : 0

|              | f1-score | precision | recall   | support |
|--------------|----------|-----------|----------|---------|
| AFIB         | 0.748401 | 0.765341  | 0.732291 | 204.0   |
| GSVT         | 0.768317 | 0.764556  | 0.772150 | 300.0   |
| SB           | 0.784035 | 0.781771  | 0.786318 | 892.0   |
| SR           | 0.778998 | 0.778661  | 0.779346 | 681.0   |
| macro avg    | 0.769938 | 0.772582  | 0.767526 | 2077.0  |
| micro avg    | 0.776679 | 0.776679  | 0.776679 | 2077.0  |
| weighted avg | 0.776613 | 0.776651  | 0.776679 | 2077.0  |

The result of Model Number:Dataset Number:Featuregroup Number:Rescale of 5 : 1 : 0 : 1

|              | f1-score | precision | recall   | support |
|--------------|----------|-----------|----------|---------|
| AFIB         | 0.770215 | 0.779220  | 0.761563 | 204.0   |
| GSVT         | 0.791403 | 0.787764  | 0.795097 | 300.0   |
| SB           | 0.802608 | 0.800112  | 0.805125 | 892.0   |
| SR           | 0.795695 | 0.797951  | 0.793487 | 681.0   |
| macro avg    | 0.789980 | 0.791262  | 0.788818 | 2077.0  |
| micro avg    | 0.795582 | 0.795582  | 0.795582 | 2077.0  |
| weighted avg | 0.795541 | 0.795568  | 0.795582 | 2077.0  |

The result of Model Number:Dataset Number:Featuregroup Number:Rescale of 5 : 1 : 1 : 0

|      | f1-score | precision | recall   | support |
|------|----------|-----------|----------|---------|
| AFIB | 0.717979 | 0.717621  | 0.718369 | 875.0   |
| GSVT | 0.726910 | 0.731773  | 0.722169 | 691.0   |
| SB   | 0.770624 | 0.768853  | 0.772408 | 1553.0  |

SR 0.748304 0.748126 0.748611 907.0  
macro avg 0.740954 0.741594 0.740389 4026.0  
micro avg 0.746679 0.746679 0.746679 4026.0  
weighted avg 0.746651 0.746685 0.746679 4026.0

The result of Model Number:Dataset Number:Featuregroup Number:Rescale of 5 : 1 : 1 : 1

f1-score precision recall support  
AFIB 0.754658 0.744175 0.765512 875.0  
GSVT 0.781625 0.792053 0.771571 691.0  
SB 0.830340 0.828639 0.832051 1553.0  
SR 0.808729 0.814978 0.802576 907.0  
macro avg 0.793838 0.794961 0.792927 4026.0  
micro avg 0.800569 0.800569 0.800569 4026.0  
weighted avg 0.800661 0.800924 0.800569 4026.0

The result of Model Number:Dataset Number:Featuregroup Number:Rescale of 5 : 1 : 2 : 0

f1-score precision recall support  
AFIB 0.695303 0.765921 0.637275 204.0  
GSVT 0.642108 0.686510 0.603401 300.0  
SB 0.699065 0.653188 0.751885 892.0  
SR 0.605053 0.636857 0.576439 681.0  
macro avg 0.660382 0.685619 0.642250 2077.0  
micro avg 0.661656 0.661656 0.661656 2077.0  
weighted avg 0.659644 0.663719 0.661656 2077.0

The result of Model Number:Dataset Number:Featuregroup Number:Rescale of 5 : 1 : 2 : 1

f1-score precision recall support  
AFIB 0.838216 0.881520 0.799216 204.0  
GSVT 0.878941 0.870349 0.887722 300.0  
SB 0.894438 0.887243 0.901756 892.0  
SR 0.883390 0.884465 0.882353 681.0  
macro avg 0.873746 0.880894 0.867762 2077.0  
micro avg 0.883296 0.883296 0.883296 2077.0  
weighted avg 0.883055 0.883330 0.883296 2077.0

The result of Model Number:Dataset Number:Featuregroup Number:Rescale of 5 : 1 : 3 : 0

f1-score precision recall support  
AFIB 0.796129 0.794118 0.798275 875.0  
GSVT 0.811661 0.807199 0.816217 691.0  
SB 0.849874 0.844750 0.855072 1553.0  
SR 0.824816 0.839703 0.810463 907.0  
macro avg 0.820620 0.821442 0.820007 4026.0  
micro avg 0.826009 0.826009 0.826009 4026.0  
weighted avg 0.825989 0.826164 0.826009 4026.0

The result of Model Number:Dataset Number:Featuregroup Number:Rescale of 5 : 1 : 3 : 1

f1-score precision recall support  
AFIB 0.767891 0.776246 0.759937 204.0

GSVT 0.793877 0.790566 0.797344 300.0  
SB 0.810145 0.809420 0.810871 892.0  
SR 0.802489 0.802496 0.802489 681.0  
macro avg 0.793600 0.794682 0.792660 2077.0  
micro avg 0.801166 0.801166 0.801166 2077.0  
weighted avg 0.801135 0.801168 0.801166 2077.0  
The result of Model Number:Dataset Number:Featuregroup Number:Rescale of 5 : 1 : 4 : 0

f1-score precision recall support  
AFIB 0.846165 0.857467 0.835395 204.0  
GSVT 0.861113 0.855867 0.866555 300.0  
SB 0.881870 0.881088 0.882659 892.0  
SR 0.875354 0.875487 0.875227 681.0  
macro avg 0.866125 0.867477 0.864959 2077.0  
micro avg 0.873254 0.873254 0.873254 2077.0  
weighted avg 0.873229 0.873289 0.873254 2077.0  
The result of Model Number:Dataset Number:Featuregroup Number:Rescale of 5 : 1 : 4 : 1

f1-score precision recall support  
AFIB 0.830667 0.849451 0.812720 875.0  
GSVT 0.880695 0.884444 0.877031 691.0  
SB 0.956253 0.951746 0.960808 1553.0  
SR 0.906036 0.892139 0.920412 907.0  
macro avg 0.893413 0.894445 0.892743 4026.0  
micro avg 0.905143 0.905143 0.905143 4026.0  
weighted avg 0.904677 0.904533 0.905143 4026.0  
The result of Model Number:Dataset Number:Featuregroup Number:Rescale of 5 : 1 : 5 : 0

f1-score precision recall support  
AFIB 0.808471 0.828141 0.789912 204.0  
GSVT 0.818634 0.807364 0.830331 300.0  
SB 0.835164 0.826823 0.843680 892.0  
SR 0.820582 0.831350 0.810112 681.0  
macro avg 0.820712 0.823420 0.818509 2077.0  
micro avg 0.825465 0.825465 0.825465 2077.0  
weighted avg 0.825373 0.825626 0.825465 2077.0  
The result of Model Number:Dataset Number:Featuregroup Number:Rescale of 5 : 1 : 5 : 1

f1-score precision recall support  
AFIB 0.787408 0.797615 0.777668 204.0  
GSVT 0.817875 0.817347 0.818429 300.0  
SB 0.835109 0.833345 0.836885 892.0  
SR 0.826710 0.826240 0.827197 681.0  
macro avg 0.816775 0.818637 0.815045 2077.0  
micro avg 0.825227 0.825227 0.825227 2077.0  
weighted avg 0.825181 0.825195 0.825227 2077.0  
The result of Model Number:Dataset Number:Featuregroup Number:Rescale of 5 : 1 : 6 : 0

f1-score precision recall support  
AFIB 0.709609 0.704968 0.714372 875.0  
GSVT 0.730700 0.736917 0.724684 691.0  
SB 0.777928 0.776234 0.779632 1553.0  
SR 0.758970 0.762017 0.755958 907.0  
macro avg 0.744302 0.745034 0.743661 4026.0  
micro avg 0.750684 0.750684 0.750684 4026.0  
weighted avg 0.750703 0.750794 0.750684 4026.0

The result of Model Number:Dataset Number:Featuregroup Number:Rescale of 5 : 1 : 6 : 1

f1-score precision recall support  
AFIB 0.745530 0.761232 0.730580 204.0  
GSVT 0.768710 0.761687 0.775881 300.0  
SB 0.781264 0.779522 0.783016 892.0  
SR 0.771979 0.772787 0.771183 681.0  
macro avg 0.766871 0.768807 0.765165 2077.0  
micro avg 0.772955 0.772955 0.772955 2077.0  
weighted avg 0.772897 0.772941 0.772955 2077.0

The result of Model Number:Dataset Number:Featuregroup Number:Rescale of 5 : 1 : 7 : 0

f1-score precision recall support  
AFIB 0.771370 0.798149 0.746434 204.0  
GSVT 0.786160 0.777554 0.795056 300.0  
SB 0.807089 0.801293 0.812970 892.0  
SR 0.792674 0.796572 0.788829 681.0  
macro avg 0.789323 0.793392 0.785822 2077.0  
micro avg 0.795932 0.795932 0.795932 2077.0  
weighted avg 0.795831 0.796008 0.795932 2077.0

The result of Model Number:Dataset Number:Featuregroup Number:Rescale of 5 : 1 : 7 : 1

f1-score precision recall support  
AFIB 0.663398 0.650182 0.677196 875.0  
GSVT 0.539947 0.502122 0.676808 691.0  
SB 0.438107 0.438862 0.437356 1553.0  
SR 0.710228 0.716482 0.704112 907.0  
macro avg 0.587920 0.576912 0.623868 4026.0  
micro avg 0.590677 0.590677 0.590677 4026.0  
weighted avg 0.565856 0.558191 0.590677 4026.0

The result of Model Number:Dataset Number:Featuregroup Number:Rescale of 5 : 1 : 8 : 0

f1-score precision recall support  
AFIB 0.840340 0.843231 0.837574 875.0  
GSVT 0.856293 0.839209 0.874242 691.0  
SB 0.906455 0.901553 0.911416 1553.0  
SR 0.871395 0.891656 0.852086 907.0  
macro avg 0.868621 0.868912 0.868830 4026.0  
micro avg 0.875621 0.875621 0.875621 4026.0

weighted avg 0.875578 0.875948 0.875621 4026.0

The result of Model Number:Dataset Number:Featuregroup Number:Rescale of 5 : 1 : 8 : 1

f1-score precision recall support

|              |          |          |          |        |
|--------------|----------|----------|----------|--------|
| AFIB         | 0.668221 | 0.665504 | 0.670978 | 875.0  |
| GSVT         | 0.677989 | 0.682087 | 0.673965 | 691.0  |
| SB           | 0.715067 | 0.714196 | 0.715942 | 1553.0 |
| SR           | 0.700149 | 0.701258 | 0.699064 | 907.0  |
| macro avg    | 0.690357 | 0.690761 | 0.689987 | 4026.0 |
| micro avg    | 0.695163 | 0.695163 | 0.695163 | 4026.0 |
| weighted avg | 0.695161 | 0.695188 | 0.695163 | 4026.0 |

The result of Model Number:Dataset Number:Featuregroup Number:Rescale of 5 : 1 : 9 : 0

f1-score precision recall support

|              |          |          |          |        |
|--------------|----------|----------|----------|--------|
| AFIB         | 0.912816 | 0.944739 | 0.883402 | 204.0  |
| GSVT         | 0.951366 | 0.945567 | 0.957367 | 300.0  |
| SB           | 0.970902 | 0.966913 | 0.974927 | 892.0  |
| SR           | 0.961926 | 0.960523 | 0.963339 | 681.0  |
| macro avg    | 0.949252 | 0.954435 | 0.944759 | 2077.0 |
| micro avg    | 0.959602 | 0.959602 | 0.959602 | 2077.0 |
| weighted avg | 0.959432 | 0.959557 | 0.959602 | 2077.0 |

The result of Model Number:Dataset Number:Featuregroup Number:Rescale of 5 : 1 : 9 : 1

f1-score precision recall support

|              |          |          |          |        |
|--------------|----------|----------|----------|--------|
| AFIB         | 0.842914 | 0.876936 | 0.811500 | 204.0  |
| GSVT         | 0.874281 | 0.860079 | 0.889111 | 300.0  |
| SB           | 0.896899 | 0.889689 | 0.904239 | 892.0  |
| SR           | 0.872769 | 0.879054 | 0.866620 | 681.0  |
| macro avg    | 0.871716 | 0.876439 | 0.867868 | 2077.0 |
| micro avg    | 0.880611 | 0.880611 | 0.880611 | 2077.0 |
| weighted avg | 0.880418 | 0.880672 | 0.880611 | 2077.0 |

The result of Model Number:Dataset Number:Featuregroup Number:Rescale of 5 : 1 : 10 : 0

f1-score precision recall support

|              |          |          |          |        |
|--------------|----------|----------|----------|--------|
| AFIB         | 0.732619 | 0.774295 | 0.695685 | 204.0  |
| GSVT         | 0.774212 | 0.765687 | 0.782969 | 300.0  |
| SB           | 0.785729 | 0.777911 | 0.793733 | 892.0  |
| SR           | 0.776601 | 0.779256 | 0.774087 | 681.0  |
| macro avg    | 0.767290 | 0.774287 | 0.761619 | 2077.0 |
| micro avg    | 0.776107 | 0.776107 | 0.776107 | 2077.0 |
| weighted avg | 0.775857 | 0.776231 | 0.776107 | 2077.0 |

The result of Model Number:Dataset Number:Featuregroup Number:Rescale of 5 : 1 : 10 : 1

f1-score precision recall support

|      |          |          |          |       |
|------|----------|----------|----------|-------|
| AFIB | 0.815416 | 0.830375 | 0.801050 | 204.0 |
| GSVT | 0.826171 | 0.817833 | 0.834697 | 300.0 |

SB 0.846521 0.842115 0.850980 892.0  
SR 0.834997 0.840229 0.829848 681.0  
macro avg 0.830776 0.832638 0.829143 2077.0  
micro avg 0.836795 0.836795 0.836795 2077.0  
weighted avg 0.836748 0.836836 0.836795 2077.0  
The result of Model Number:Dataset Number:Featuregroup Number:Rescale of 6 : 0 : 0 : 0

f1-score precision recall support  
AFIB 0.790978 0.799397 0.783173 204.0  
GSVT 0.814224 0.808798 0.819960 300.0  
SB 0.831430 0.830687 0.832175 892.0  
SR 0.824419 0.825519 0.823328 681.0  
macro avg 0.815263 0.816100 0.814659 2077.0  
micro avg 0.822697 0.822697 0.822697 2077.0  
weighted avg 0.822673 0.822758 0.822697 2077.0

The result of Model Number:Dataset Number:Featuregroup Number:Rescale of 6 : 0 : 0 : 1

f1-score precision recall support  
AFIB 0.751928 0.731073 0.776375 875.0  
GSVT 0.761744 0.793830 0.736838 691.0  
SB 0.836802 0.836380 0.837237 1553.0  
SR 0.815809 0.820915 0.810773 907.0  
macro avg 0.791571 0.795549 0.790306 4026.0  
micro avg 0.800815 0.800815 0.800815 4026.0  
weighted avg 0.800744 0.802706 0.800815 4026.0

The result of Model Number:Dataset Number:Featuregroup Number:Rescale of 6 : 0 : 1 : 0

f1-score precision recall support  
AFIB 0.592969 0.570300 0.630269 875.0  
GSVT 0.614416 0.593211 0.643178 691.0  
SB 0.684574 0.672490 0.697851 1553.0  
SR 0.579818 0.697198 0.500595 907.0  
macro avg 0.617944 0.633300 0.617973 4026.0  
micro avg 0.629340 0.629340 0.629340 4026.0  
weighted avg 0.629023 0.642240 0.629340 4026.0

The result of Model Number:Dataset Number:Featuregroup Number:Rescale of 6 : 0 : 1 : 1

f1-score precision recall support  
AFIB 0.795739 0.829843 0.764630 204.0  
GSVT 0.822479 0.810052 0.835345 300.0  
SB 0.838792 0.830497 0.847257 892.0  
SR 0.816067 0.823049 0.809234 681.0  
macro avg 0.818269 0.823360 0.814117 2077.0  
micro avg 0.824954 0.824954 0.824954 2077.0  
weighted avg 0.824756 0.825038 0.824954 2077.0

The result of Model Number:Dataset Number:Featuregroup Number:Rescale of 6 : 0 : 2 : 0

f1-score precision recall support



AFIB 0.642554 0.644765 0.640440 875.0  
GSVT 0.654753 0.641690 0.668477 691.0  
SB 0.693108 0.689360 0.696901 1553.0  
SR 0.666300 0.681792 0.651536 907.0  
macro avg 0.664179 0.664402 0.664339 4026.0  
micro avg 0.669531 0.669531 0.669531 4026.0  
weighted avg 0.669498 0.669781 0.669531 4026.0

The result of Model Number:Dataset Number:Featuregroup Number:Rescale of 6 : 0 : 2 : 1

f1-score precision recall support

AFIB 0.712561 0.707624 0.717710 875.0  
GSVT 0.723554 0.726490 0.720758 691.0  
SB 0.785057 0.776894 0.793398 1553.0  
SR 0.745419 0.762764 0.728913 907.0  
macro avg 0.741648 0.743443 0.740195 4026.0  
micro avg 0.749953 0.749953 0.749953 4026.0  
weighted avg 0.749815 0.750005 0.749953 4026.0

The result of Model Number:Dataset Number:Featuregroup Number:Rescale of 6 : 0 : 3 : 0

f1-score precision recall support

AFIB 0.798271 0.860488 0.744814 204.0  
GSVT 0.822614 0.836539 0.809180 300.0  
SB 0.871816 0.863792 0.880017 892.0  
SR 0.837117 0.824977 0.849657 681.0  
macro avg 0.832454 0.846449 0.820917 2077.0  
micro avg 0.846552 0.846552 0.846552 2077.0  
weighted avg 0.846109 0.846805 0.846552 2077.0

The result of Model Number:Dataset Number:Featuregroup Number:Rescale of 6 : 0 : 3 : 1

f1-score precision recall support

AFIB 0.676976 0.678112 0.693755 204.0  
GSVT 0.670612 0.696635 0.647327 300.0  
SB 0.711329 0.672319 0.755437 892.0  
SR 0.616571 0.673472 0.570097 681.0  
macro avg 0.668872 0.680135 0.666654 2077.0  
micro avg 0.672994 0.672994 0.672994 2077.0  
weighted avg 0.671005 0.676778 0.672994 2077.0

The result of Model Number:Dataset Number:Featuregroup Number:Rescale of 6 : 0 : 4 : 0

f1-score precision recall support

AFIB 0.794463 0.794841 0.794199 875.0  
GSVT 0.815038 0.807983 0.822245 691.0  
SB 0.870464 0.864120 0.876909 1553.0  
SR 0.833276 0.849841 0.817388 907.0  
macro avg 0.828310 0.829196 0.827685 4026.0  
micro avg 0.836141 0.836141 0.836141 4026.0  
weighted avg 0.836055 0.836211 0.836141 4026.0

The result of Model Number:Dataset Number:Featuregroup Number:Rescale of 6 : 0 : 4 : 1

|              | f1-score | precision | recall   | support |
|--------------|----------|-----------|----------|---------|
| AFIB         | 0.762566 | 0.753338  | 0.772057 | 875.0   |
| GSVT         | 0.772889 | 0.780813  | 0.765183 | 691.0   |
| SB           | 0.820886 | 0.818215  | 0.823581 | 1553.0  |
| SR           | 0.802931 | 0.811181  | 0.794875 | 907.0   |
| macro avg    | 0.789818 | 0.790887  | 0.788924 | 4026.0  |
| micro avg    | 0.795893 | 0.795893  | 0.795893 | 4026.0  |
| weighted avg | 0.795928 | 0.796111  | 0.795893 | 4026.0  |

The result of Model Number:Dataset Number:Featuregroup Number:Rescale of 6 : 0 : 5 : 0

|              | f1-score | precision | recall   | support |
|--------------|----------|-----------|----------|---------|
| AFIB         | 0.781709 | 0.775690  | 0.787881 | 875.0   |
| GSVT         | 0.791858 | 0.795534  | 0.788388 | 691.0   |
| SB           | 0.848586 | 0.844072  | 0.853167 | 1553.0  |
| SR           | 0.823584 | 0.835163  | 0.812412 | 907.0   |
| macro avg    | 0.811434 | 0.812615  | 0.810462 | 4026.0  |
| micro avg    | 0.818678 | 0.818678  | 0.818678 | 4026.0  |
| weighted avg | 0.818682 | 0.818872  | 0.818678 | 4026.0  |

The result of Model Number:Dataset Number:Featuregroup Number:Rescale of 6 : 0 : 5 : 1

|              | f1-score | precision | recall   | support |
|--------------|----------|-----------|----------|---------|
| AFIB         | 0.677643 | 0.682482  | 0.672994 | 204.0   |
| GSVT         | 0.701338 | 0.700886  | 0.701804 | 300.0   |
| SB           | 0.715370 | 0.713783  | 0.716972 | 892.0   |
| SR           | 0.708976 | 0.709834  | 0.708142 | 681.0   |
| macro avg    | 0.700832 | 0.701746  | 0.699978 | 2077.0  |
| micro avg    | 0.707567 | 0.707567  | 0.707567 | 2077.0  |
| weighted avg | 0.707541 | 0.707551  | 0.707567 | 2077.0  |

The result of Model Number:Dataset Number:Featuregroup Number:Rescale of 6 : 0 : 6 : 0

|              | f1-score | precision | recall   | support |
|--------------|----------|-----------|----------|---------|
| AFIB         | 0.873658 | 0.869259  | 0.878140 | 875.0   |
| GSVT         | 0.890675 | 0.894987  | 0.886418 | 691.0   |
| SB           | 0.948623 | 0.946440  | 0.950820 | 1553.0  |
| SR           | 0.924875 | 0.929823  | 0.919989 | 907.0   |
| macro avg    | 0.909457 | 0.910127  | 0.908842 | 4026.0  |
| micro avg    | 0.917024 | 0.917024  | 0.917024 | 4026.0  |
| weighted avg | 0.917034 | 0.917091  | 0.917024 | 4026.0  |

The result of Model Number:Dataset Number:Featuregroup Number:Rescale of 6 : 0 : 6 : 1

|           | f1-score | precision | recall   | support |
|-----------|----------|-----------|----------|---------|
| AFIB      | 0.791844 | 0.809319  | 0.775167 | 204.0   |
| GSVT      | 0.809150 | 0.795732  | 0.823125 | 300.0   |
| SB        | 0.824698 | 0.818247  | 0.831260 | 892.0   |
| SR        | 0.804683 | 0.814369  | 0.795228 | 681.0   |
| macro avg | 0.807594 | 0.809417  | 0.806195 | 2077.0  |

micro avg 0.812761 0.812761 0.812761 2077.0  
weighted avg 0.812663 0.812846 0.812761 2077.0  
The result of Model Number:Dataset Number:Featuregroup Number:Rescale of 6 : 0 : 7 : 0

|              | f1-score | precision | recall   | support |
|--------------|----------|-----------|----------|---------|
| AFIB         | 0.769356 | 0.778803  | 0.760256 | 204.0   |
| GSVT         | 0.784852 | 0.781500  | 0.788252 | 300.0   |
| SB           | 0.794353 | 0.791969  | 0.796755 | 892.0   |
| SR           | 0.787667 | 0.789542  | 0.785827 | 681.0   |
| macro avg    | 0.784057 | 0.785453  | 0.782772 | 2077.0  |
| micro avg    | 0.788359 | 0.788359  | 0.788359 | 2077.0  |
| weighted avg | 0.788333 | 0.788368  | 0.788359 | 2077.0  |

The result of Model Number:Dataset Number:Featuregroup Number:Rescale of 6 : 0 : 7 : 1

|              | f1-score | precision | recall   | support |
|--------------|----------|-----------|----------|---------|
| AFIB         | 0.780859 | 0.809687  | 0.754085 | 204.0   |
| GSVT         | 0.797550 | 0.789364  | 0.806030 | 300.0   |
| SB           | 0.819393 | 0.815572  | 0.823251 | 892.0   |
| SR           | 0.806617 | 0.807122  | 0.806139 | 681.0   |
| macro avg    | 0.801105 | 0.805436  | 0.797376 | 2077.0  |
| micro avg    | 0.808360 | 0.808360  | 0.808360 | 2077.0  |
| weighted avg | 0.808264 | 0.808438  | 0.808360 | 2077.0  |

The result of Model Number:Dataset Number:Featuregroup Number:Rescale of 6 : 0 : 8 : 0

|              | f1-score | precision | recall   | support |
|--------------|----------|-----------|----------|---------|
| AFIB         | 0.666239 | 0.681421  | 0.651824 | 875.0   |
| GSVT         | 0.708963 | 0.710364  | 0.707804 | 691.0   |
| SB           | 0.775653 | 0.771408  | 0.779948 | 1553.0  |
| SR           | 0.733108 | 0.724216  | 0.742324 | 907.0   |
| macro avg    | 0.720991 | 0.721852  | 0.720475 | 4026.0  |
| micro avg    | 0.731243 | 0.731243  | 0.731243 | 4026.0  |
| weighted avg | 0.730842 | 0.730741  | 0.731243 | 4026.0  |

The result of Model Number:Dataset Number:Featuregroup Number:Rescale of 6 : 0 : 8 : 1

|              | f1-score | precision | recall   | support |
|--------------|----------|-----------|----------|---------|
| AFIB         | 0.874898 | 0.877909  | 0.872019 | 875.0   |
| GSVT         | 0.891508 | 0.873722  | 0.910195 | 691.0   |
| SB           | 0.943733 | 0.938629  | 0.948897 | 1553.0  |
| SR           | 0.907231 | 0.928325  | 0.887128 | 907.0   |
| macro avg    | 0.904343 | 0.904646  | 0.904560 | 4026.0  |
| micro avg    | 0.911631 | 0.911631  | 0.911631 | 4026.0  |
| weighted avg | 0.911586 | 0.911971  | 0.911631 | 4026.0  |

The result of Model Number:Dataset Number:Featuregroup Number:Rescale of 6 : 0 : 9 : 0

|      | f1-score | precision | recall   | support |
|------|----------|-----------|----------|---------|
| AFIB | 0.625898 | 0.640161  | 0.612356 | 875.0   |
| GSVT | 0.666035 | 0.667351  | 0.664946 | 691.0   |
| SB   | 0.728686 | 0.724698  | 0.732721 | 1553.0  |

SR 0.688718 0.680364 0.697376 907.0  
macro avg 0.677334 0.678144 0.676850 4026.0  
micro avg 0.686966 0.686966 0.686966 4026.0  
weighted avg 0.686589 0.686495 0.686966 4026.0

The result of Model Number:Dataset Number:Featuregroup Number:Rescale of 6 : 0 : 9 : 1

f1-score precision recall support

AFIB 0.868790 0.873222 0.864431 875.0  
GSVT 0.880780 0.876198 0.885487 691.0  
SB 0.923195 0.922370 0.924028 1553.0  
SR 0.906196 0.906935 0.905495 907.0  
macro avg 0.894740 0.894681 0.894860 4026.0  
micro avg 0.900285 0.900285 0.900285 4026.0  
weighted avg 0.900261 0.900286 0.900285 4026.0

The result of Model Number:Dataset Number:Featuregroup Number:Rescale of 6 : 0 : 10 : 0

f1-score precision recall support

AFIB 0.771794 0.778025 0.765729 204.0  
GSVT 0.789504 0.785632 0.793441 300.0  
SB 0.804912 0.804019 0.805814 892.0  
SR 0.798902 0.799964 0.797848 681.0  
macro avg 0.791278 0.791910 0.790708 2077.0  
micro avg 0.797478 0.797478 0.797478 2077.0  
weighted avg 0.797463 0.797481 0.797478 2077.0

The result of Model Number:Dataset Number:Featuregroup Number:Rescale of 6 : 0 : 10 : 1

f1-score precision recall support

AFIB 0.659129 0.702075 0.621426 204.0  
GSVT 0.688004 0.671093 0.705883 300.0  
SB 0.708182 0.699085 0.717544 892.0  
SR 0.689788 0.698024 0.681789 681.0  
macro avg 0.686276 0.692569 0.681661 2077.0  
micro avg 0.694696 0.694696 0.694696 2077.0  
weighted avg 0.694419 0.694988 0.694696 2077.0

The result of Model Number:Dataset Number:Featuregroup Number:Rescale of 6 : 1 : 0 : 0

f1-score precision recall support

AFIB 0.665007 0.674421 0.656398 204.0  
GSVT 0.678814 0.666316 0.691915 300.0  
SB 0.693282 0.685617 0.701132 892.0  
SR 0.678712 0.692535 0.665470 681.0  
macro avg 0.678954 0.679722 0.678729 2077.0  
micro avg 0.683714 0.683714 0.683714 2077.0  
weighted avg 0.683638 0.683998 0.683714 2077.0

The result of Model Number:Dataset Number:Featuregroup Number:Rescale of 6 : 1 : 0 : 1

f1-score precision recall support

|              |          |          |          |        |
|--------------|----------|----------|----------|--------|
| AFIB         | 0.920581 | 0.928013 | 0.913346 | 204.0  |
| GSVT         | 0.941704 | 0.937087 | 0.946401 | 300.0  |
| SB           | 0.960084 | 0.959019 | 0.961159 | 892.0  |
| SR           | 0.952915 | 0.954182 | 0.951657 | 681.0  |
| macro avg    | 0.943821 | 0.944575 | 0.943141 | 2077.0 |
| micro avg    | 0.951216 | 0.951216 | 0.951216 | 2077.0 |
| weighted avg | 0.951198 | 0.951220 | 0.951216 | 2077.0 |

The result of Model Number:Dataset Number:Featuregroup Number:Rescale of 6 : 1 : 1 : 0

f1-score precision recall support

|              |          |          |          |        |
|--------------|----------|----------|----------|--------|
| AFIB         | 0.869776 | 0.869724 | 0.869883 | 875.0  |
| GSVT         | 0.871659 | 0.866946 | 0.876438 | 691.0  |
| SB           | 0.913301 | 0.907224 | 0.919472 | 1553.0 |
| SR           | 0.889050 | 0.903637 | 0.874960 | 907.0  |
| macro avg    | 0.885947 | 0.886883 | 0.885188 | 4026.0 |
| micro avg    | 0.891280 | 0.891280 | 0.891280 | 4026.0 |
| weighted avg | 0.891231 | 0.891353 | 0.891280 | 4026.0 |

The result of Model Number:Dataset Number:Featuregroup Number:Rescale of 6 : 1 : 1 : 1

f1-score precision recall support

|              |          |          |          |        |
|--------------|----------|----------|----------|--------|
| AFIB         | 0.900914 | 0.929791 | 0.874045 | 204.0  |
| GSVT         | 0.927866 | 0.911903 | 0.944535 | 300.0  |
| SB           | 0.943917 | 0.934586 | 0.953439 | 892.0  |
| SR           | 0.918679 | 0.930174 | 0.907483 | 681.0  |
| macro avg    | 0.922844 | 0.926614 | 0.919876 | 2077.0 |
| micro avg    | 0.929287 | 0.929287 | 0.929287 | 2077.0 |
| weighted avg | 0.929100 | 0.929392 | 0.929287 | 2077.0 |

The result of Model Number:Dataset Number:Featuregroup Number:Rescale of 6 : 1 : 2 : 0

f1-score precision recall support

|              |          |          |          |        |
|--------------|----------|----------|----------|--------|
| AFIB         | 0.816554 | 0.861310 | 0.776762 | 204.0  |
| GSVT         | 0.777532 | 0.804793 | 0.752154 | 300.0  |
| SB           | 0.799768 | 0.768922 | 0.833206 | 892.0  |
| SR           | 0.711816 | 0.731127 | 0.693538 | 681.0  |
| macro avg    | 0.776418 | 0.791538 | 0.763915 | 2077.0 |
| micro avg    | 0.770161 | 0.770161 | 0.770161 | 2077.0 |
| weighted avg | 0.769368 | 0.770785 | 0.770161 | 2077.0 |

The result of Model Number:Dataset Number:Featuregroup Number:Rescale of 6 : 1 : 2 : 1

f1-score precision recall support

|           |          |          |          |        |
|-----------|----------|----------|----------|--------|
| AFIB      | 0.855631 | 0.854246 | 0.857096 | 875.0  |
| GSVT      | 0.863471 | 0.866905 | 0.860108 | 691.0  |
| SB        | 0.906795 | 0.903499 | 0.910122 | 1553.0 |
| SR        | 0.891963 | 0.896475 | 0.887545 | 907.0  |
| macro avg | 0.879465 | 0.880281 | 0.878718 | 4026.0 |
| micro avg | 0.884927 | 0.884927 | 0.884927 | 4026.0 |

weighted avg 0.884898 0.884931 0.884927 4026.0

The result of Model Number:Dataset Number:Featuregroup Number:Rescale of 6 : 1 : 3 : 0

f1-score precision recall support

|              |          |          |          |        |
|--------------|----------|----------|----------|--------|
| AFIB         | 0.703205 | 0.704386 | 0.720634 | 204.0  |
| GSVT         | 0.696594 | 0.723627 | 0.672407 | 300.0  |
| SB           | 0.738890 | 0.698368 | 0.784706 | 892.0  |
| SR           | 0.640460 | 0.699565 | 0.592185 | 681.0  |
| macro avg    | 0.694787 | 0.706486 | 0.692483 | 2077.0 |
| micro avg    | 0.699070 | 0.699070 | 0.699070 | 2077.0 |
| weighted avg | 0.697003 | 0.703000 | 0.699070 | 2077.0 |

The result of Model Number:Dataset Number:Featuregroup Number:Rescale of 6 : 1 : 3 : 1

f1-score precision recall support

|              |          |          |          |        |
|--------------|----------|----------|----------|--------|
| AFIB         | 0.593728 | 0.579763 | 0.625065 | 875.0  |
| GSVT         | 0.570519 | 0.565259 | 0.583519 | 691.0  |
| SB           | 0.618766 | 0.575198 | 0.670188 | 1553.0 |
| SR           | 0.385808 | 0.483866 | 0.321294 | 907.0  |
| macro avg    | 0.542205 | 0.551021 | 0.550016 | 4026.0 |
| micro avg    | 0.566905 | 0.566905 | 0.566905 | 4026.0 |
| weighted avg | 0.552561 | 0.553908 | 0.566905 | 4026.0 |

The result of Model Number:Dataset Number:Featuregroup Number:Rescale of 6 : 1 : 4 : 0

f1-score precision recall support

|              |          |          |          |        |
|--------------|----------|----------|----------|--------|
| AFIB         | 0.883944 | 0.891080 | 0.876997 | 204.0  |
| GSVT         | 0.904226 | 0.899793 | 0.908736 | 300.0  |
| SB           | 0.921874 | 0.920852 | 0.922907 | 892.0  |
| SR           | 0.914990 | 0.916207 | 0.913783 | 681.0  |
| macro avg    | 0.906259 | 0.906983 | 0.905606 | 2077.0 |
| micro avg    | 0.913359 | 0.913359 | 0.913359 | 2077.0 |
| weighted avg | 0.913343 | 0.913363 | 0.913359 | 2077.0 |

The result of Model Number:Dataset Number:Featuregroup Number:Rescale of 6 : 1 : 4 : 1

f1-score precision recall support

|              |          |          |          |        |
|--------------|----------|----------|----------|--------|
| AFIB         | 0.860816 | 0.843668 | 0.878720 | 875.0  |
| GSVT         | 0.700628 | 0.651547 | 0.878217 | 691.0  |
| SB           | 0.568482 | 0.569462 | 0.567507 | 1553.0 |
| SR           | 0.921583 | 0.929698 | 0.913647 | 907.0  |
| macro avg    | 0.762877 | 0.748594 | 0.809523 | 4026.0 |
| micro avg    | 0.766454 | 0.766454 | 0.766454 | 4026.0 |
| weighted avg | 0.734247 | 0.724302 | 0.766454 | 4026.0 |

The result of Model Number:Dataset Number:Featuregroup Number:Rescale of 6 : 1 : 5 : 0

f1-score precision recall support

|      |          |          |          |       |
|------|----------|----------|----------|-------|
| AFIB | 0.762729 | 0.779993 | 0.746311 | 204.0 |
| GSVT | 0.783027 | 0.779193 | 0.786933 | 300.0 |
| SB   | 0.799045 | 0.796738 | 0.801372 | 892.0 |
| SR   | 0.793912 | 0.793568 | 0.794267 | 681.0 |

macro avg 0.784678 0.787373 0.782220 2077.0  
micro avg 0.791549 0.791549 0.791549 2077.0  
weighted avg 0.791481 0.791520 0.791549 2077.0

The result of Model Number:Dataset Number:Featuregroup Number:Rescale of 6 : 1 : 5 : 1

f1-score precision recall support  
AFIB 0.782889 0.774238 0.791750 875.0  
GSVT 0.796994 0.801902 0.792160 691.0  
SB 0.848248 0.846836 0.849668 1553.0  
SR 0.827593 0.835332 0.820018 907.0  
macro avg 0.813931 0.814577 0.813399 4026.0  
micro avg 0.820530 0.820530 0.820530 4026.0  
weighted avg 0.820593 0.820754 0.820530 4026.0

The result of Model Number:Dataset Number:Featuregroup Number:Rescale of 6 : 1 : 6 : 0

f1-score precision recall support  
AFIB 0.809233 0.826821 0.792599 204.0  
GSVT 0.842638 0.837667 0.847691 300.0  
SB 0.860741 0.858832 0.862668 892.0  
SR 0.852112 0.851631 0.852615 681.0  
macro avg 0.841181 0.843738 0.838893 2077.0  
micro avg 0.850327 0.850327 0.850327 2077.0  
weighted avg 0.850238 0.850270 0.850327 2077.0

The result of Model Number:Dataset Number:Featuregroup Number:Rescale of 6 : 1 : 6 : 1

f1-score precision recall support  
AFIB 0.743474 0.760012 0.727799 204.0  
GSVT 0.775150 0.770333 0.780057 300.0  
SB 0.791976 0.790309 0.793661 892.0  
SR 0.783541 0.782987 0.784121 681.0  
macro avg 0.773535 0.775910 0.771410 2077.0  
micro avg 0.782099 0.782099 0.782099 2077.0  
weighted avg 0.782016 0.782047 0.782099 2077.0

The result of Model Number:Dataset Number:Featuregroup Number:Rescale of 6 : 1 : 7 : 0

f1-score precision recall support  
AFIB 0.828156 0.844842 0.812649 204.0  
GSVT 0.854729 0.847865 0.861871 300.0  
SB 0.873233 0.872354 0.874115 892.0  
SR 0.865273 0.864777 0.865781 681.0  
macro avg 0.855348 0.857459 0.853604 2077.0  
micro avg 0.863577 0.863577 0.863577 2077.0  
weighted avg 0.863523 0.863630 0.863577 2077.0

The result of Model Number:Dataset Number:Featuregroup Number:Rescale of 6 : 1 : 7 : 1

f1-score precision recall support  
AFIB 0.807856 0.825853 0.790860 204.0  
GSVT 0.817823 0.805845 0.830503 300.0

SB 0.836304 0.827993 0.844820 892.0  
SR 0.820877 0.832667 0.809441 681.0  
macro avg 0.820715 0.823089 0.818906 2077.0  
micro avg 0.825852 0.825852 0.825852 2077.0  
weighted avg 0.825782 0.826116 0.825852 2077.0

The result of Model Number:Dataset Number:Featuregroup Number:Rescale of 6 : 1 : 8 : 0

f1-score precision recall support  
AFIB 0.716833 0.720490 0.713237 875.0  
GSVT 0.726726 0.722945 0.730610 691.0  
SB 0.761722 0.761042 0.762410 1553.0  
SR 0.747696 0.748306 0.747118 907.0  
macro avg 0.738244 0.738196 0.738344 4026.0  
micro avg 0.742820 0.742820 0.742820 4026.0  
weighted avg 0.742800 0.742820 0.742820 4026.0

The result of Model Number:Dataset Number:Featuregroup Number:Rescale of 6 : 1 : 8 : 1

f1-score precision recall support  
AFIB 0.704597 0.702316 0.706914 875.0  
GSVT 0.712767 0.714982 0.710637 691.0  
SB 0.752085 0.750448 0.753732 1553.0  
SR 0.738216 0.741698 0.734793 907.0  
macro avg 0.726916 0.727361 0.726519 4026.0  
micro avg 0.731893 0.731893 0.731893 4026.0  
weighted avg 0.731891 0.731929 0.731893 4026.0

The result of Model Number:Dataset Number:Featuregroup Number:Rescale of 6 : 1 : 9 : 0

f1-score precision recall support  
AFIB 0.784163 0.783445 0.784976 875.0  
GSVT 0.800236 0.798683 0.801878 691.0  
SB 0.849154 0.847263 0.851067 1553.0  
SR 0.825977 0.831366 0.820688 907.0  
macro avg 0.814882 0.815189 0.814652 4026.0  
micro avg 0.821417 0.821417 0.821417 4026.0  
weighted avg 0.821412 0.821474 0.821417 4026.0

The result of Model Number:Dataset Number:Featuregroup Number:Rescale of 6 : 1 : 9 : 1

f1-score precision recall support  
AFIB 0.910510 0.924938 0.896646 204.0  
GSVT 0.933913 0.925966 0.942003 300.0  
SB 0.950037 0.947920 0.952168 892.0  
SR 0.941036 0.943128 0.938972 681.0  
macro avg 0.933874 0.935488 0.932447 2077.0  
micro avg 0.940919 0.940919 0.940919 2077.0  
weighted avg 0.940875 0.940920 0.940919 2077.0

The result of Model Number:Dataset Number:Featuregroup Number:Rescale of 6 : 1 : 10 :

0



|              | f1-score | precision | recall   | support |
|--------------|----------|-----------|----------|---------|
| AFIB         | 0.749358 | 0.753843  | 0.744964 | 204.0   |
| GSVT         | 0.769320 | 0.767033  | 0.771626 | 300.0   |
| SB           | 0.781101 | 0.780143  | 0.782063 | 892.0   |
| SR           | 0.775406 | 0.776321  | 0.774500 | 681.0   |
| macro avg    | 0.768796 | 0.769335  | 0.768288 | 2077.0  |
| micro avg    | 0.774432 | 0.774432  | 0.774432 | 2077.0  |
| weighted avg | 0.774414 | 0.774413  | 0.774432 | 2077.0  |

The result of Model Number:Dataset Number:Featuregroup Number:Rescale of 6 : 1 : 10 : 1

|              | f1-score | precision | recall   | support |
|--------------|----------|-----------|----------|---------|
| AFIB         | 0.664513 | 0.663224  | 0.665892 | 875.0   |
| GSVT         | 0.676991 | 0.665146  | 0.689330 | 691.0   |
| SB           | 0.725249 | 0.714958  | 0.735847 | 1553.0  |
| SR           | 0.687002 | 0.717627  | 0.658912 | 907.0   |
| macro avg    | 0.688438 | 0.690239  | 0.687495 | 4026.0  |
| micro avg    | 0.695327 | 0.695327  | 0.695327 | 4026.0  |
| weighted avg | 0.695149 | 0.695766  | 0.695327 | 4026.0  |

The result of Model Number:Dataset Number:Featuregroup Number:Rescale of 7 : 0 : 0 : 0

|              | f1-score | precision | recall   | support |
|--------------|----------|-----------|----------|---------|
| AFIB         | 0.700450 | 0.691737  | 0.709464 | 875.0   |
| GSVT         | 0.722380 | 0.731426  | 0.713627 | 691.0   |
| SB           | 0.770679 | 0.769844  | 0.771521 | 1553.0  |
| SR           | 0.749892 | 0.753738  | 0.746090 | 907.0   |
| macro avg    | 0.735850 | 0.736686  | 0.735175 | 4026.0  |
| micro avg    | 0.742368 | 0.742368  | 0.742368 | 4026.0  |
| weighted avg | 0.742443 | 0.742646  | 0.742368 | 4026.0  |

The result of Model Number:Dataset Number:Featuregroup Number:Rescale of 7 : 0 : 0 : 1

|              | f1-score | precision | recall   | support |
|--------------|----------|-----------|----------|---------|
| AFIB         | 0.687743 | 0.706331  | 0.670250 | 204.0   |
| GSVT         | 0.693412 | 0.683204  | 0.704024 | 300.0   |
| SB           | 0.706843 | 0.699324  | 0.714529 | 892.0   |
| SR           | 0.693733 | 0.703265  | 0.684467 | 681.0   |
| macro avg    | 0.695433 | 0.698031  | 0.693317 | 2077.0  |
| micro avg    | 0.698806 | 0.698806  | 0.698806 | 2077.0  |
| weighted avg | 0.698729 | 0.698976  | 0.698806 | 2077.0  |

The result of Model Number:Dataset Number:Featuregroup Number:Rescale of 7 : 0 : 1 : 0

|           | f1-score | precision | recall   | support |
|-----------|----------|-----------|----------|---------|
| AFIB      | 0.712728 | 0.712831  | 0.712720 | 875.0   |
| GSVT      | 0.725176 | 0.719165  | 0.731343 | 691.0   |
| SB        | 0.759250 | 0.752682  | 0.765946 | 1553.0  |
| SR        | 0.734231 | 0.750817  | 0.718387 | 907.0   |
| macro avg | 0.732846 | 0.733874  | 0.732099 | 4026.0  |

micro avg 0.737724 0.737724 0.737724 4026.0  
weighted avg 0.737655 0.737848 0.737724 4026.0  
The result of Model Number:Dataset Number:Featuregroup Number:Rescale of 7 : 0 : 1 : 1

|              | f1-score | precision | recall   | support |
|--------------|----------|-----------|----------|---------|
| AFIB         | 0.827086 | 0.825748  | 0.828502 | 875.0   |
| GSVT         | 0.834664 | 0.837984  | 0.831414 | 691.0   |
| SB           | 0.876543 | 0.873357  | 0.879759 | 1553.0  |
| SR           | 0.862205 | 0.866567  | 0.857935 | 907.0   |
| macro avg    | 0.850125 | 0.850914  | 0.849402 | 4026.0  |
| micro avg    | 0.855405 | 0.855405  | 0.855405 | 4026.0  |
| weighted avg | 0.855376 | 0.855409  | 0.855405 | 4026.0  |

The result of Model Number:Dataset Number:Featuregroup Number:Rescale of 7 : 0 : 2 : 0

|              | f1-score | precision | recall   | support |
|--------------|----------|-----------|----------|---------|
| AFIB         | 0.844932 | 0.825239  | 0.865724 | 875.0   |
| GSVT         | 0.811104 | 0.820020  | 0.802435 | 691.0   |
| SB           | 0.853558 | 0.798440  | 0.916869 | 1553.0  |
| SR           | 0.683140 | 0.820319  | 0.585633 | 907.0   |
| macro avg    | 0.798184 | 0.816005  | 0.792665 | 4026.0  |
| micro avg    | 0.811490 | 0.811490  | 0.811490 | 4026.0  |
| weighted avg | 0.806004 | 0.812898  | 0.811490 | 4026.0  |

The result of Model Number:Dataset Number:Featuregroup Number:Rescale of 7 : 0 : 2 : 1

|              | f1-score | precision | recall   | support |
|--------------|----------|-----------|----------|---------|
| AFIB         | 0.753228 | 0.751051  | 0.755488 | 875.0   |
| GSVT         | 0.767189 | 0.766565  | 0.767867 | 691.0   |
| SB           | 0.814866 | 0.811491  | 0.818276 | 1553.0  |
| SR           | 0.790403 | 0.799086  | 0.781949 | 907.0   |
| macro avg    | 0.781421 | 0.782048  | 0.780895 | 4026.0  |
| micro avg    | 0.787794 | 0.787794  | 0.787794 | 4026.0  |
| weighted avg | 0.787776 | 0.787849  | 0.787794 | 4026.0  |

The result of Model Number:Dataset Number:Featuregroup Number:Rescale of 7 : 0 : 3 : 0

|              | f1-score | precision | recall   | support |
|--------------|----------|-----------|----------|---------|
| AFIB         | 0.852390 | 0.862356  | 0.842815 | 204.0   |
| GSVT         | 0.875838 | 0.871811  | 0.879927 | 300.0   |
| SB           | 0.888239 | 0.885477  | 0.891024 | 892.0   |
| SR           | 0.880589 | 0.883085  | 0.878145 | 681.0   |
| macro avg    | 0.874264 | 0.875682  | 0.872978 | 2077.0  |
| micro avg    | 0.880464 | 0.880464  | 0.880464 | 2077.0  |
| weighted avg | 0.880419 | 0.880448  | 0.880464 | 2077.0  |

The result of Model Number:Dataset Number:Featuregroup Number:Rescale of 7 : 0 : 3 : 1

|      | f1-score | precision | recall   | support |
|------|----------|-----------|----------|---------|
| AFIB | 0.836502 | 0.842137  | 0.831065 | 875.0   |
| GSVT | 0.851430 | 0.839604  | 0.863750 | 691.0   |
| SB   | 0.907292 | 0.901079  | 0.913598 | 1553.0  |

SR 0.870524 0.885561 0.856037 907.0  
macro avg 0.866437 0.867095 0.866113 4026.0  
micro avg 0.874137 0.874137 0.874137 4026.0  
weighted avg 0.874035 0.874222 0.874137 4026.0

The result of Model Number:Dataset Number:Featuregroup Number:Rescale of 7 : 0 : 4 : 0

f1-score precision recall support  
AFIB 0.650921 0.667961 0.635024 204.0  
GSVT 0.612471 0.630272 0.595982 300.0  
SB 0.646288 0.623534 0.670778 892.0  
SR 0.585781 0.604858 0.567989 681.0  
macro avg 0.623865 0.631656 0.617443 2077.0  
micro avg 0.622761 0.622761 0.622761 2077.0  
weighted avg 0.622020 0.622747 0.622761 2077.0

The result of Model Number:Dataset Number:Featuregroup Number:Rescale of 7 : 0 : 4 : 1

f1-score precision recall support  
AFIB 0.715559 0.696761 0.760355 875.0  
GSVT 0.688361 0.651542 0.784717 691.0  
SB 0.652257 0.648135 0.656452 1553.0  
SR 0.633565 0.644481 0.623189 907.0  
macro avg 0.672435 0.660230 0.706178 4026.0  
micro avg 0.693555 0.693555 0.693555 4026.0  
weighted avg 0.668001 0.658465 0.693555 4026.0

The result of Model Number:Dataset Number:Featuregroup Number:Rescale of 7 : 0 : 5 : 0

f1-score precision recall support  
AFIB 0.848418 0.842541 0.854550 875.0  
GSVT 0.861507 0.865004 0.858179 691.0  
SB 0.934737 0.925018 0.944668 1553.0  
SR 0.887541 0.908193 0.867889 907.0  
macro avg 0.883051 0.885189 0.881321 4026.0  
micro avg 0.892940 0.892940 0.892940 4026.0  
weighted avg 0.892776 0.893002 0.892940 4026.0

The result of Model Number:Dataset Number:Featuregroup Number:Rescale of 7 : 0 : 5 : 1

f1-score precision recall support  
AFIB 0.792983 0.812012 0.775186 204.0  
GSVT 0.821179 0.816420 0.826094 300.0  
SB 0.838717 0.835641 0.841819 892.0  
SR 0.831429 0.832046 0.830823 681.0  
macro avg 0.821077 0.824030 0.818480 2077.0  
micro avg 0.829398 0.829398 0.829398 2077.0  
weighted avg 0.829302 0.829365 0.829398 2077.0

The result of Model Number:Dataset Number:Featuregroup Number:Rescale of 7 : 0 : 6 : 0

f1-score precision recall support  
AFIB 0.742650 0.741455 0.744152 875.0

GSVT 0.759965 0.756004 0.764012 691.0  
SB 0.794583 0.787851 0.801437 1553.0  
SR 0.764251 0.781241 0.748241 907.0  
macro avg 0.765362 0.766638 0.764461 4026.0  
micro avg 0.770579 0.770579 0.770579 4026.0  
weighted avg 0.770521 0.770812 0.770579 4026.0

The result of Model Number:Dataset Number:Featuregroup Number:Rescale of 7 : 0 : 6 : 1

f1-score precision recall support

AFIB 0.711775 0.724984 0.699215 204.0  
GSVT 0.727426 0.723612 0.731295 300.0  
SB 0.739039 0.736412 0.741689 892.0  
SR 0.731431 0.732749 0.730149 681.0  
macro avg 0.727418 0.729439 0.725587 2077.0  
micro avg 0.732232 0.732232 0.732232 2077.0  
weighted avg 0.732189 0.732240 0.732232 2077.0

The result of Model Number:Dataset Number:Featuregroup Number:Rescale of 7 : 0 : 7 : 0

f1-score precision recall support

AFIB 0.669834 0.661282 0.678649 875.0  
GSVT 0.681591 0.685500 0.677745 691.0  
SB 0.729601 0.726537 0.732698 1553.0  
SR 0.708119 0.719580 0.697029 907.0  
macro avg 0.697286 0.698225 0.696530 4026.0  
micro avg 0.703484 0.703484 0.703484 4026.0  
weighted avg 0.703532 0.703744 0.703484 4026.0

The result of Model Number:Dataset Number:Featuregroup Number:Rescale of 7 : 0 : 7 : 1

f1-score precision recall support

AFIB 0.780420 0.768180 0.793141 875.0  
GSVT 0.751986 0.773544 0.731684 691.0  
SB 0.790212 0.750156 0.834833 1553.0  
SR 0.642043 0.714463 0.583053 907.0  
macro avg 0.741165 0.751586 0.735678 4026.0  
micro avg 0.751345 0.751345 0.751345 4026.0  
weighted avg 0.748142 0.750046 0.751345 4026.0

The result of Model Number:Dataset Number:Featuregroup Number:Rescale of 7 : 0 : 8 : 0

f1-score precision recall support

AFIB 0.888452 0.901367 0.876304 204.0  
GSVT 0.908046 0.895761 0.920745 300.0  
SB 0.921712 0.912107 0.931529 892.0  
SR 0.903444 0.918394 0.888988 681.0  
macro avg 0.905414 0.906907 0.904392 2077.0  
micro avg 0.910599 0.910599 0.910599 2077.0  
weighted avg 0.910482 0.910752 0.910599 2077.0

The result of Model Number:Dataset Number:Featuregroup Number:Rescale of 7 : 0 : 8 : 1

f1-score precision recall support  
AFIB 0.753960 0.744263 0.763966 875.0  
GSVT 0.769307 0.775676 0.763074 691.0  
SB 0.822544 0.818883 0.826248 1553.0  
SR 0.799137 0.810956 0.787676 907.0  
macro avg 0.786237 0.787445 0.785241 4026.0  
micro avg 0.793179 0.793179 0.793179 4026.0  
weighted avg 0.793228 0.793464 0.793179 4026.0  
The result of Model Number:Dataset Number:Featuregroup Number:Rescale of 7 : 0 : 9 : 0

f1-score precision recall support  
AFIB 0.835100 0.823500 0.847111 875.0  
GSVT 0.864942 0.876481 0.853816 691.0  
SB 0.918849 0.916967 0.920743 1553.0  
SR 0.894935 0.901850 0.888126 907.0  
macro avg 0.878457 0.879699 0.877449 4026.0  
micro avg 0.885905 0.885905 0.885905 4026.0  
weighted avg 0.886008 0.886299 0.885905 4026.0  
The result of Model Number:Dataset Number:Featuregroup Number:Rescale of 7 : 0 : 9 : 1

f1-score precision recall support  
AFIB 0.812951 0.880815 0.756416 204.0  
GSVT 0.871984 0.861019 0.883587 300.0  
SB 0.894244 0.881716 0.907238 892.0  
SR 0.869851 0.873926 0.866238 681.0  
macro avg 0.862257 0.874369 0.853369 2077.0  
micro avg 0.875565 0.875565 0.875565 2077.0  
weighted avg 0.875046 0.876084 0.875565 2077.0  
The result of Model Number:Dataset Number:Featuregroup Number:Rescale of 7 : 0 : 10 : 0

f1-score precision recall support  
AFIB 0.734009 0.757118 0.712448 204.0  
GSVT 0.697348 0.712243 0.683179 300.0  
SB 0.720027 0.694831 0.747145 892.0  
SR 0.657566 0.679790 0.636797 681.0  
macro avg 0.702237 0.710996 0.694892 2077.0  
micro avg 0.698317 0.698317 0.698317 2077.0  
weighted avg 0.697645 0.698532 0.698317 2077.0  
The result of Model Number:Dataset Number:Featuregroup Number:Rescale of 7 : 0 : 10 : 1

f1-score precision recall support  
AFIB 0.858082 0.844925 0.871798 875.0  
GSVT 0.887670 0.896371 0.879311 691.0  
SB 0.944718 0.942511 0.946965 1553.0  
SR 0.921118 0.932798 0.909748 907.0

macro avg 0.902897 0.904151 0.901956 4026.0  
micro avg 0.910632 0.910632 0.910632 4026.0  
weighted avg 0.910781 0.911194 0.910632 4026.0

The result of Model Number:Dataset Number:Featuregroup Number:Rescale of 7 : 1 : 0 : 0

f1-score precision recall support

AFIB 0.888416 0.911892 0.866205 204.0  
GSVT 0.912780 0.905197 0.920658 300.0  
SB 0.937932 0.934490 0.941402 892.0  
SR 0.923410 0.924529 0.922318 681.0  
macro avg 0.915634 0.919027 0.912646 2077.0  
micro avg 0.924763 0.924763 0.924763 2077.0  
weighted avg 0.924674 0.924773 0.924763 2077.0

The result of Model Number:Dataset Number:Featuregroup Number:Rescale of 7 : 1 : 0 : 1

f1-score precision recall support

AFIB 0.722268 0.700681 0.770126 875.0  
GSVT 0.618516 0.604972 0.632910 691.0  
SB 0.820388 0.813704 0.827401 1553.0  
SR 0.769642 0.801955 0.741276 907.0  
macro avg 0.732704 0.730328 0.742928 4026.0  
micro avg 0.762169 0.762169 0.762169 4026.0  
weighted avg 0.752983 0.750667 0.762169 4026.0

The result of Model Number:Dataset Number:Featuregroup Number:Rescale of 7 : 1 : 1 : 0

f1-score precision recall support

AFIB 0.750818 0.761447 0.741098 204.0  
GSVT 0.766406 0.752295 0.781197 300.0  
SB 0.782741 0.774087 0.791604 892.0  
SR 0.766291 0.781898 0.751341 681.0  
macro avg 0.766564 0.767432 0.766310 2077.0  
micro avg 0.771939 0.771939 0.771939 2077.0  
weighted avg 0.771853 0.772259 0.771939 2077.0

The result of Model Number:Dataset Number:Featuregroup Number:Rescale of 7 : 1 : 1 : 1

f1-score precision recall support

AFIB 0.797960 0.800655 0.795312 875.0  
GSVT 0.795853 0.790247 0.801611 691.0  
SB 0.837384 0.829612 0.845308 1553.0  
SR 0.805548 0.821072 0.790640 907.0  
macro avg 0.809186 0.810397 0.808218 4026.0  
micro avg 0.814626 0.814626 0.814626 4026.0  
weighted avg 0.814515 0.814638 0.814626 4026.0

The result of Model Number:Dataset Number:Featuregroup Number:Rescale of 7 : 1 : 2 : 0

f1-score precision recall support

AFIB 0.655293 0.654233 0.656415 875.0  
GSVT 0.661298 0.663928 0.658722 691.0

SB 0.694478 0.691953 0.697026 1553.0  
SR 0.683118 0.686574 0.679735 907.0  
macro avg 0.673547 0.674172 0.672975 4026.0  
micro avg 0.677730 0.677730 0.677730 4026.0  
weighted avg 0.677708 0.677733 0.677730 4026.0

The result of Model Number:Dataset Number:Featuregroup Number:Rescale of 7 : 1 : 2 : 1

f1-score precision recall support  
AFIB 0.786558 0.806174 0.767933 875.0  
GSVT 0.836760 0.839968 0.833616 691.0  
SB 0.906141 0.901754 0.910574 1553.0  
SR 0.858619 0.844307 0.873479 907.0  
macro avg 0.847019 0.848051 0.846400 4026.0  
micro avg 0.858007 0.858007 0.858007 4026.0  
weighted avg 0.857537 0.857434 0.858007 4026.0

The result of Model Number:Dataset Number:Featuregroup Number:Rescale of 7 : 1 : 3 : 0

f1-score precision recall support  
AFIB 0.756439 0.759269 0.753952 875.0  
GSVT 0.773466 0.780928 0.766301 691.0  
SB 0.822436 0.813810 0.831311 1553.0  
SR 0.793956 0.800944 0.787363 907.0  
macro avg 0.786575 0.788738 0.784732 4026.0  
micro avg 0.793439 0.793439 0.793439 4026.0  
weighted avg 0.793272 0.793414 0.793439 4026.0

The result of Model Number:Dataset Number:Featuregroup Number:Rescale of 7 : 1 : 3 : 1

f1-score precision recall support  
AFIB 0.737821 0.744630 0.731176 875.0  
GSVT 0.755050 0.753011 0.757125 691.0  
SB 0.804138 0.796580 0.811850 1553.0  
SR 0.781921 0.789766 0.774244 907.0  
macro avg 0.769732 0.770997 0.768599 4026.0  
micro avg 0.776452 0.776452 0.776452 4026.0  
weighted avg 0.776294 0.776276 0.776452 4026.0

The result of Model Number:Dataset Number:Featuregroup Number:Rescale of 7 : 1 : 4 : 0

f1-score precision recall support  
AFIB 0.854431 0.855193 0.853758 875.0  
GSVT 0.870082 0.872364 0.867957 691.0  
SB 0.923603 0.917454 0.929845 1553.0  
SR 0.905608 0.913876 0.897521 907.0  
macro avg 0.888431 0.889722 0.887270 4026.0  
micro avg 0.895404 0.895404 0.895404 4026.0  
weighted avg 0.895329 0.895377 0.895404 4026.0

The result of Model Number:Dataset Number:Featuregroup Number:Rescale of 7 : 1 : 4 : 1

f1-score precision recall support

AFIB 0.814654 0.831068 0.799399 204.0  
GSVT 0.840794 0.834041 0.847819 300.0  
SB 0.858996 0.858132 0.859863 892.0  
SR 0.851166 0.850678 0.851665 681.0  
macro avg 0.841403 0.843480 0.839687 2077.0  
micro avg 0.849497 0.849497 0.849497 2077.0  
weighted avg 0.849445 0.849550 0.849497 2077.0

The result of Model Number:Dataset Number:Featuregroup Number:Rescale of 7 : 1 : 5 : 0

f1-score precision recall support

AFIB 0.824722 0.839878 0.810204 204.0  
GSVT 0.838575 0.833084 0.844162 300.0  
SB 0.852920 0.848755 0.857126 892.0  
SR 0.844104 0.847613 0.840635 681.0  
macro avg 0.840080 0.842333 0.838032 2077.0  
micro avg 0.845238 0.845238 0.845238 2077.0  
weighted avg 0.845188 0.845245 0.845238 2077.0

The result of Model Number:Dataset Number:Featuregroup Number:Rescale of 7 : 1 : 5 : 1

f1-score precision recall support

AFIB 0.702400 0.695335 0.709630 875.0  
GSVT 0.708686 0.714995 0.702538 691.0  
SB 0.749758 0.747457 0.752075 1553.0  
SR 0.735239 0.741675 0.728917 907.0  
macro avg 0.724021 0.724866 0.723290 4026.0  
micro avg 0.729130 0.729130 0.729130 4026.0  
weighted avg 0.729145 0.729255 0.729130 4026.0

The result of Model Number:Dataset Number:Featuregroup Number:Rescale of 7 : 1 : 6 : 0

f1-score precision recall support

AFIB 0.762135 0.756985 0.767460 875.0  
GSVT 0.780729 0.781040 0.780519 691.0  
SB 0.829365 0.827249 0.831502 1553.0  
SR 0.806783 0.815797 0.797977 907.0  
macro avg 0.794753 0.795268 0.794364 4026.0  
micro avg 0.801280 0.801280 0.801280 4026.0  
weighted avg 0.801319 0.801467 0.801280 4026.0

The result of Model Number:Dataset Number:Featuregroup Number:Rescale of 7 : 1 : 6 : 1

f1-score precision recall support

AFIB 0.648106 0.643220 0.735591 204.0  
GSVT 0.785700 0.781048 0.790416 300.0  
SB 0.642593 0.641252 0.643943 892.0  
SR 0.794737 0.793465 0.796023 681.0  
macro avg 0.717784 0.714746 0.741493 2077.0  
micro avg 0.723965 0.723965 0.723965 2077.0  
weighted avg 0.713689 0.711545 0.723965 2077.0



The result of Model Number:Dataset Number:Featuregroup Number:Rescale of 7 : 1 : 7 : 0

|              | f1-score | precision | recall   | support |
|--------------|----------|-----------|----------|---------|
| AFIB         | 0.672284 | 0.682477  | 0.662409 | 204.0   |
| GSVT         | 0.683095 | 0.677336  | 0.688988 | 300.0   |
| SB           | 0.698246 | 0.695994  | 0.700515 | 892.0   |
| SR           | 0.690751 | 0.693317  | 0.688223 | 681.0   |
| macro avg    | 0.686094 | 0.687281  | 0.685034 | 2077.0  |
| micro avg    | 0.691077 | 0.691077  | 0.691077 | 2077.0  |
| weighted avg | 0.691050 | 0.691094  | 0.691077 | 2077.0  |

The result of Model Number:Dataset Number:Featuregroup Number:Rescale of 7 : 1 : 7 : 1

|              | f1-score | precision | recall   | support |
|--------------|----------|-----------|----------|---------|
| AFIB         | 0.779968 | 0.780339  | 0.779709 | 875.0   |
| GSVT         | 0.800167 | 0.793241  | 0.807243 | 691.0   |
| SB           | 0.854581 | 0.848354  | 0.860909 | 1553.0  |
| SR           | 0.818072 | 0.834335  | 0.802474 | 907.0   |
| macro avg    | 0.813197 | 0.814067  | 0.812584 | 4026.0  |
| micro avg    | 0.820886 | 0.820886  | 0.820886 | 4026.0  |
| weighted avg | 0.820801 | 0.820954  | 0.820886 | 4026.0  |

The result of Model Number:Dataset Number:Featuregroup Number:Rescale of 7 : 1 : 8 : 0

|              | f1-score | precision | recall   | support |
|--------------|----------|-----------|----------|---------|
| AFIB         | 0.684282 | 0.763187  | 0.620254 | 204.0   |
| GSVT         | 0.806838 | 0.792795  | 0.821560 | 300.0   |
| SB           | 0.861454 | 0.857635  | 0.865315 | 892.0   |
| SR           | 0.841463 | 0.829957  | 0.853317 | 681.0   |
| macro avg    | 0.798509 | 0.810894  | 0.790112 | 2077.0  |
| micro avg    | 0.830992 | 0.830992  | 0.830992 | 2077.0  |
| weighted avg | 0.829609 | 0.829918  | 0.830992 | 2077.0  |

The result of Model Number:Dataset Number:Featuregroup Number:Rescale of 7 : 1 : 8 : 1

|              | f1-score | precision | recall   | support |
|--------------|----------|-----------|----------|---------|
| AFIB         | 0.851197 | 0.887013  | 0.818237 | 204.0   |
| GSVT         | 0.879755 | 0.866289  | 0.893780 | 300.0   |
| SB           | 0.900975 | 0.894513  | 0.907541 | 892.0   |
| SR           | 0.877591 | 0.882053  | 0.873206 | 681.0   |
| macro avg    | 0.877379 | 0.882467  | 0.873191 | 2077.0  |
| micro avg    | 0.885525 | 0.885525  | 0.885525 | 2077.0  |
| weighted avg | 0.885354 | 0.885614  | 0.885525 | 2077.0  |

The result of Model Number:Dataset Number:Featuregroup Number:Rescale of 7 : 1 : 9 : 0

|           | f1-score | precision | recall   | support |
|-----------|----------|-----------|----------|---------|
| AFIB      | 0.801842 | 0.811217  | 0.792835 | 204.0   |
| GSVT      | 0.823900 | 0.820112  | 0.827746 | 300.0   |
| SB        | 0.835565 | 0.832967  | 0.838186 | 892.0   |
| SR        | 0.828369 | 0.830717  | 0.826070 | 681.0   |
| macro avg | 0.822419 | 0.823753  | 0.821209 | 2077.0  |

micro avg 0.828251 0.828251 0.828251 2077.0  
weighted avg 0.828209 0.828236 0.828251 2077.0  
The result of Model Number:Dataset Number:Featuregroup Number:Rescale of 7 : 1 : 9 : 1

|              | f1-score | precision | recall   | support |
|--------------|----------|-----------|----------|---------|
| AFIB         | 0.868898 | 0.876912  | 0.861239 | 204.0   |
| GSVT         | 0.900664 | 0.900696  | 0.900656 | 300.0   |
| SB           | 0.919527 | 0.917894  | 0.921174 | 892.0   |
| SR           | 0.909768 | 0.909524  | 0.910034 | 681.0   |
| macro avg    | 0.899714 | 0.901257  | 0.898276 | 2077.0  |
| micro avg    | 0.908671 | 0.908671  | 0.908671 | 2077.0  |
| weighted avg | 0.908630 | 0.908640  | 0.908671 | 2077.0  |

The result of Model Number:Dataset Number:Featuregroup Number:Rescale of 7 : 1 : 10 : 0

|              | f1-score | precision | recall   | support |
|--------------|----------|-----------|----------|---------|
| AFIB         | 0.631525 | 0.700864  | 0.574823 | 204.0   |
| GSVT         | 0.737392 | 0.728173  | 0.746991 | 300.0   |
| SB           | 0.784548 | 0.780545  | 0.788594 | 892.0   |
| SR           | 0.766169 | 0.755458  | 0.777192 | 681.0   |
| macro avg    | 0.729909 | 0.741260  | 0.721900 | 2077.0  |
| micro avg    | 0.757850 | 0.757850  | 0.757850 | 2077.0  |
| weighted avg | 0.756681 | 0.756929  | 0.757850 | 2077.0  |

The result of Model Number:Dataset Number:Featuregroup Number:Rescale of 7 : 1 : 10 : 1

|              | f1-score | precision | recall   | support |
|--------------|----------|-----------|----------|---------|
| AFIB         | 0.709188 | 0.719940  | 0.698770 | 204.0   |
| GSVT         | 0.720591 | 0.714517  | 0.726808 | 300.0   |
| SB           | 0.736575 | 0.734199  | 0.738968 | 892.0   |
| SR           | 0.728668 | 0.731375  | 0.726001 | 681.0   |
| macro avg    | 0.723755 | 0.725007  | 0.722637 | 2077.0  |
| micro avg    | 0.729012 | 0.729012  | 0.729012 | 2077.0  |
| weighted avg | 0.728984 | 0.729029  | 0.729012 | 2077.0  |

The result of Model Number:Dataset Number:Featuregroup Number:Rescale of 8 : 0 : 0 : 0

|              | f1-score | precision | recall   | support |
|--------------|----------|-----------|----------|---------|
| AFIB         | 0.659666 | 0.652301  | 0.667207 | 875.0   |
| GSVT         | 0.672790 | 0.678953  | 0.666749 | 691.0   |
| SB           | 0.717562 | 0.715225  | 0.719917 | 1553.0  |
| SR           | 0.698960 | 0.705962  | 0.692098 | 907.0   |
| macro avg    | 0.687245 | 0.688110  | 0.686493 | 4026.0  |
| micro avg    | 0.693068 | 0.693068  | 0.693068 | 4026.0  |
| weighted avg | 0.693104 | 0.693237  | 0.693068 | 4026.0  |

The result of Model Number:Dataset Number:Featuregroup Number:Rescale of 8 : 0 : 0 : 1

|      | f1-score | precision | recall   | support |
|------|----------|-----------|----------|---------|
| AFIB | 0.691056 | 0.684877  | 0.697377 | 875.0   |

GSVT 0.702151 0.704929 0.699420 691.0  
SB 0.748643 0.747254 0.750041 1553.0  
SR 0.729673 0.736418 0.723077 907.0  
macro avg 0.717881 0.718370 0.717479 4026.0  
micro avg 0.723832 0.723832 0.723832 4026.0  
weighted avg 0.723874 0.723992 0.723832 4026.0  
The result of Model Number:Dataset Number:Featuregroup Number:Rescale of 8 : 0 : 1 : 0

f1-score precision recall support  
AFIB 0.640008 0.631852 0.648399 875.0  
GSVT 0.611091 0.615296 0.606959 691.0  
SB 0.647036 0.609646 0.689326 1553.0  
SR 0.527680 0.610511 0.464670 907.0  
macro avg 0.606454 0.616826 0.602339 4026.0  
micro avg 0.615682 0.615682 0.615682 4026.0  
weighted avg 0.612450 0.615637 0.615682 4026.0  
The result of Model Number:Dataset Number:Featuregroup Number:Rescale of 8 : 0 : 1 : 1

f1-score precision recall support  
AFIB 0.766860 0.766615 0.767145 875.0  
GSVT 0.778288 0.768284 0.788648 691.0  
SB 0.823227 0.821436 0.825029 1553.0  
SR 0.800449 0.812183 0.789063 907.0  
macro avg 0.792206 0.792129 0.792471 4026.0  
micro avg 0.798102 0.798102 0.798102 4026.0  
weighted avg 0.798132 0.798314 0.798102 4026.0  
The result of Model Number:Dataset Number:Featuregroup Number:Rescale of 8 : 0 : 2 : 0

f1-score precision recall support  
AFIB 0.733387 0.727777 0.739181 875.0  
GSVT 0.750261 0.754364 0.746247 691.0  
SB 0.794466 0.793910 0.795029 1553.0  
SR 0.773364 0.777115 0.769688 907.0  
macro avg 0.762869 0.763291 0.762536 4026.0  
micro avg 0.768810 0.768810 0.768810 4026.0  
weighted avg 0.768850 0.768966 0.768810 4026.0  
The result of Model Number:Dataset Number:Featuregroup Number:Rescale of 8 : 0 : 2 : 1

f1-score precision recall support  
AFIB 0.694723 0.695926 0.693534 875.0  
GSVT 0.703146 0.695067 0.711474 691.0  
SB 0.740438 0.731509 0.749589 1553.0  
SR 0.705242 0.726611 0.685111 907.0  
macro avg 0.710887 0.712278 0.709927 4026.0  
micro avg 0.716338 0.716338 0.716338 4026.0  
weighted avg 0.716173 0.716417 0.716338 4026.0  
The result of Model Number:Dataset Number:Featuregroup Number:Rescale of 8 : 0 : 3 : 0

f1-score precision recall support  
AFIB 0.881480 0.869086 0.894274 875.0  
GSVT 0.900458 0.907214 0.893825 691.0  
SB 0.957534 0.954720 0.960368 1553.0  
SR 0.933948 0.946868 0.921390 907.0  
macro avg 0.918355 0.919472 0.917464 4026.0  
micro avg 0.925801 0.925801 0.925801 4026.0  
weighted avg 0.925895 0.926186 0.925801 4026.0

The result of Model Number:Dataset Number:Featuregroup Number:Rescale of 8 : 0 : 3 : 1

f1-score precision recall support  
AFIB 0.716911 0.715390 0.718472 875.0  
GSVT 0.728111 0.724621 0.731696 691.0  
SB 0.766334 0.757186 0.775708 1553.0  
SR 0.730721 0.751423 0.711144 907.0  
macro avg 0.735519 0.737155 0.734255 4026.0  
micro avg 0.741169 0.741169 0.741169 4026.0  
weighted avg 0.741009 0.741214 0.741169 4026.0

The result of Model Number:Dataset Number:Featuregroup Number:Rescale of 8 : 0 : 4 : 0

f1-score precision recall support  
AFIB 0.836198 0.828363 0.844215 875.0  
GSVT 0.850253 0.857071 0.843625 691.0  
SB 0.901312 0.897861 0.904794 1553.0  
SR 0.881145 0.890089 0.872403 907.0  
macro avg 0.867227 0.868346 0.866259 4026.0  
micro avg 0.873832 0.873832 0.873832 4026.0  
weighted avg 0.873853 0.874004 0.873832 4026.0

The result of Model Number:Dataset Number:Featuregroup Number:Rescale of 8 : 0 : 4 : 1

f1-score precision recall support  
AFIB 0.806834 0.808463 0.805228 204.0  
GSVT 0.829280 0.826815 0.831765 300.0  
SB 0.843021 0.842270 0.843777 892.0  
SR 0.835775 0.837380 0.834187 681.0  
macro avg 0.828728 0.828732 0.828739 2077.0  
micro avg 0.835111 0.835111 0.835111 2077.0  
weighted avg 0.835106 0.835114 0.835111 2077.0

The result of Model Number:Dataset Number:Featuregroup Number:Rescale of 8 : 0 : 5 : 0

f1-score precision recall support  
AFIB 0.825771 0.823232 0.828379 875.0  
GSVT 0.804721 0.808668 0.800941 691.0  
SB 0.845988 0.810881 0.884280 1553.0  
SR 0.728043 0.794335 0.672020 907.0  
macro avg 0.801131 0.809279 0.796405 4026.0  
micro avg 0.810008 0.810008 0.810008 4026.0

weighted avg 0.807940 0.809458 0.810008 4026.0

The result of Model Number:Dataset Number:Featuregroup Number:Rescale of 8 : 0 : 5 : 1

f1-score precision recall support

AFIB 0.626282 0.641878 0.611457 875.0  
GSVT 0.661712 0.664521 0.658954 691.0  
SB 0.717747 0.715000 0.720518 1553.0  
SR 0.682735 0.670012 0.695986 907.0  
macro avg 0.672119 0.672853 0.671729 4026.0  
micro avg 0.680722 0.680722 0.680722 4026.0  
weighted avg 0.680363 0.680309 0.680722 4026.0

The result of Model Number:Dataset Number:Featuregroup Number:Rescale of 8 : 0 : 6 : 0

f1-score precision recall support

AFIB 0.915139 0.922527 0.907946 204.0  
GSVT 0.936137 0.931547 0.940805 300.0  
SB 0.954408 0.953349 0.955477 892.0  
SR 0.947281 0.948541 0.946031 681.0  
macro avg 0.938241 0.938991 0.937565 2077.0  
micro avg 0.945592 0.945592 0.945592 2077.0  
weighted avg 0.945575 0.945596 0.945592 2077.0

The result of Model Number:Dataset Number:Featuregroup Number:Rescale of 8 : 0 : 6 : 1

f1-score precision recall support

AFIB 0.738567 0.718082 0.762579 875.0  
GSVT 0.748208 0.779724 0.723745 691.0  
SB 0.821933 0.821518 0.822359 1553.0  
SR 0.801313 0.806327 0.796366 907.0  
macro avg 0.777505 0.781413 0.776262 4026.0  
micro avg 0.786585 0.786585 0.786585 4026.0  
weighted avg 0.786515 0.788442 0.786585 4026.0

The result of Model Number:Dataset Number:Featuregroup Number:Rescale of 8 : 0 : 7 : 0

f1-score precision recall support

AFIB 0.874392 0.882214 0.866816 875.0  
GSVT 0.891091 0.874147 0.908876 691.0  
SB 0.945819 0.937625 0.954161 1553.0  
SR 0.906972 0.927826 0.887075 907.0  
macro avg 0.904569 0.905453 0.904232 4026.0  
micro avg 0.912292 0.912292 0.912292 4026.0  
weighted avg 0.912150 0.912480 0.912292 4026.0

The result of Model Number:Dataset Number:Featuregroup Number:Rescale of 8 : 0 : 7 : 1

f1-score precision recall support

AFIB 0.729756 0.730981 0.747844 204.0  
GSVT 0.722896 0.750949 0.697796 300.0  
SB 0.766788 0.724737 0.814334 892.0  
SR 0.664642 0.725979 0.614544 681.0

macro avg 0.721021 0.733161 0.718629 2077.0  
micro avg 0.725464 0.725464 0.725464 2077.0  
weighted avg 0.723320 0.729543 0.725464 2077.0

The result of Model Number:Dataset Number:Featuregroup Number:Rescale of 8 : 0 : 8 : 0

f1-score precision recall support  
AFIB 0.920364 0.928391 0.912704 204.0  
GSVT 0.952193 0.950638 0.953776 300.0  
SB 0.972432 0.970061 0.974828 892.0  
SR 0.963517 0.964969 0.962102 681.0  
macro avg 0.952127 0.953515 0.950852 2077.0  
micro avg 0.961513 0.961513 0.961513 2077.0  
weighted avg 0.961472 0.961493 0.961513 2077.0

The result of Model Number:Dataset Number:Featuregroup Number:Rescale of 8 : 0 : 8 : 1

f1-score precision recall support  
AFIB 0.795887 0.789759 0.802172 875.0  
GSVT 0.806221 0.809964 0.802688 691.0  
SB 0.863978 0.859382 0.868642 1553.0  
SR 0.838522 0.850311 0.827148 907.0  
macro avg 0.826152 0.827354 0.825162 4026.0  
micro avg 0.833528 0.833528 0.833528 4026.0  
weighted avg 0.833531 0.833725 0.833528 4026.0

The result of Model Number:Dataset Number:Featuregroup Number:Rescale of 8 : 0 : 9 : 0

f1-score precision recall support  
AFIB 0.821533 0.841062 0.802982 204.0  
GSVT 0.842861 0.839608 0.846227 300.0  
SB 0.863747 0.861819 0.865683 892.0  
SR 0.852880 0.851164 0.854633 681.0  
macro avg 0.845255 0.848413 0.842381 2077.0  
micro avg 0.853091 0.853091 0.853091 2077.0  
weighted avg 0.853021 0.853079 0.853091 2077.0

The result of Model Number:Dataset Number:Featuregroup Number:Rescale of 8 : 0 : 9 : 1

f1-score precision recall support  
AFIB 0.815102 0.802919 0.827690 875.0  
GSVT 0.830730 0.837834 0.823758 691.0  
SB 0.887616 0.884559 0.890699 1553.0  
SR 0.861636 0.874487 0.849186 907.0  
macro avg 0.848771 0.849950 0.847833 4026.0  
micro avg 0.856163 0.856163 0.856163 4026.0  
weighted avg 0.856239 0.856527 0.856163 4026.0

The result of Model Number:Dataset Number:Featuregroup Number:Rescale of 8 : 0 : 10 :

0

f1-score precision recall support  
AFIB 0.664025 0.669965 0.658272 875.0

GSVT 0.676707 0.663839 0.690213 691.0  
SB 0.718268 0.712045 0.724603 1553.0  
SR 0.688767 0.704603 0.673657 907.0  
macro avg 0.686942 0.687613 0.686686 4026.0  
micro avg 0.692807 0.692807 0.692807 4026.0  
weighted avg 0.692699 0.692949 0.692807 4026.0

The result of Model Number:Dataset Number:Featuregroup Number:Rescale of 8 : 0 : 10 :  
1

f1-score precision recall support

AFIB 0.590067 0.649599 0.540876 204.0  
GSVT 0.695861 0.686256 0.705850 300.0  
SB 0.738870 0.736405 0.741355 892.0  
SR 0.719948 0.709988 0.730202 681.0  
macro avg 0.686187 0.695562 0.679571 2077.0  
micro avg 0.712879 0.712879 0.712879 2077.0  
weighted avg 0.711839 0.711974 0.712879 2077.0

The result of Model Number:Dataset Number:Featuregroup Number:Rescale of 8 : 1 : 0 : 0

f1-score precision recall support

AFIB 0.751279 0.755387 0.747240 875.0  
GSVT 0.747698 0.741394 0.754186 691.0  
SB 0.786392 0.778945 0.793986 1553.0  
SR 0.757125 0.771248 0.743520 907.0  
macro avg 0.760623 0.761743 0.759733 4026.0  
micro avg 0.765626 0.765626 0.765626 4026.0  
weighted avg 0.765526 0.765646 0.765626 4026.0

The result of Model Number:Dataset Number:Featuregroup Number:Rescale of 8 : 1 : 0 : 1

f1-score precision recall support

AFIB 0.679271 0.671932 0.773236 204.0  
GSVT 0.812704 0.806371 0.819206 300.0  
SB 0.663244 0.661857 0.664638 892.0  
SR 0.822437 0.822206 0.822678 681.0  
macro avg 0.744414 0.740592 0.769939 2077.0  
micro avg 0.749448 0.749448 0.749448 2077.0  
weighted avg 0.738601 0.736295 0.749448 2077.0

The result of Model Number:Dataset Number:Featuregroup Number:Rescale of 8 : 1 : 1 : 0

f1-score precision recall support

AFIB 0.781547 0.787169 0.776006 875.0  
GSVT 0.780301 0.775629 0.785043 691.0  
SB 0.823104 0.813984 0.832432 1553.0  
SR 0.789832 0.803923 0.776252 907.0  
macro avg 0.793696 0.795176 0.792433 4026.0  
micro avg 0.799378 0.799378 0.799378 4026.0  
weighted avg 0.799230 0.799307 0.799378 4026.0

The result of Model Number:Dataset Number:Featuregroup Number:Rescale of 8 : 1 : 1 : 1

|              | f1-score | precision | recall   | support |
|--------------|----------|-----------|----------|---------|
| AFIB         | 0.671546 | 0.685493  | 0.658309 | 875.0   |
| GSVT         | 0.654891 | 0.632145  | 0.708349 | 691.0   |
| SB           | 0.771891 | 0.768410  | 0.775416 | 1553.0  |
| SR           | 0.586828 | 0.577354  | 0.596671 | 907.0   |
| macro avg    | 0.671289 | 0.665851  | 0.684686 | 4026.0  |
| micro avg    | 0.698185 | 0.698185  | 0.698185 | 4026.0  |
| weighted avg | 0.688309 | 0.683959  | 0.698185 | 4026.0  |

The result of Model Number:Dataset Number:Featuregroup Number:Rescale of 8 : 1 : 2 : 0

|              | f1-score | precision | recall   | support |
|--------------|----------|-----------|----------|---------|
| AFIB         | 0.711440 | 0.717011  | 0.705992 | 875.0   |
| GSVT         | 0.713316 | 0.704212  | 0.722702 | 691.0   |
| SB           | 0.748188 | 0.745187  | 0.751221 | 1553.0  |
| SR           | 0.732381 | 0.739570  | 0.725357 | 907.0   |
| macro avg    | 0.726331 | 0.726495  | 0.726318 | 4026.0  |
| micro avg    | 0.730669 | 0.730669  | 0.730669 | 4026.0  |
| weighted avg | 0.730655 | 0.730765  | 0.730669 | 4026.0  |

The result of Model Number:Dataset Number:Featuregroup Number:Rescale of 8 : 1 : 2 : 1

|              | f1-score | precision | recall   | support |
|--------------|----------|-----------|----------|---------|
| AFIB         | 0.745692 | 0.743625  | 0.747826 | 875.0   |
| GSVT         | 0.751593 | 0.755178  | 0.748117 | 691.0   |
| SB           | 0.786786 | 0.784272  | 0.789319 | 1553.0  |
| SR           | 0.774208 | 0.777947  | 0.770540 | 907.0   |
| macro avg    | 0.764570 | 0.765256  | 0.763951 | 4026.0  |
| micro avg    | 0.768999 | 0.768999  | 0.768999 | 4026.0  |
| weighted avg | 0.768981 | 0.769020  | 0.768999 | 4026.0  |

The result of Model Number:Dataset Number:Featuregroup Number:Rescale of 8 : 1 : 3 : 0

|              | f1-score | precision | recall   | support |
|--------------|----------|-----------|----------|---------|
| AFIB         | 0.750668 | 0.801549  | 0.706359 | 204.0   |
| GSVT         | 0.707306 | 0.728292  | 0.687762 | 300.0   |
| SB           | 0.739312 | 0.703821  | 0.778993 | 892.0   |
| SR           | 0.656003 | 0.685786  | 0.629414 | 681.0   |
| macro avg    | 0.713322 | 0.729862  | 0.700632 | 2077.0  |
| micro avg    | 0.709638 | 0.709638  | 0.709638 | 2077.0  |
| weighted avg | 0.708489 | 0.711041  | 0.709638 | 2077.0  |

The result of Model Number:Dataset Number:Featuregroup Number:Rescale of 8 : 1 : 3 : 1

|           | f1-score | precision | recall   | support |
|-----------|----------|-----------|----------|---------|
| AFIB      | 0.691766 | 0.677795  | 0.706379 | 875.0   |
| GSVT      | 0.714701 | 0.726065  | 0.703841 | 691.0   |
| SB        | 0.760452 | 0.760410  | 0.760501 | 1553.0  |
| SR        | 0.742015 | 0.748776  | 0.735387 | 907.0   |
| macro avg | 0.727234 | 0.728261  | 0.726527 | 4026.0  |



micro avg 0.733356 0.733356 0.733356 4026.0  
weighted avg 0.733518 0.733939 0.733356 4026.0  
The result of Model Number:Dataset Number:Featuregroup Number:Rescale of 8 : 1 : 4 : 0

|              | f1-score | precision | recall   | support |
|--------------|----------|-----------|----------|---------|
| AFIB         | 0.869560 | 0.916862  | 0.827122 | 204.0   |
| GSVT         | 0.912878 | 0.899071  | 0.927152 | 300.0   |
| SB           | 0.934571 | 0.928491  | 0.940745 | 892.0   |
| SR           | 0.923041 | 0.923873  | 0.922232 | 681.0   |
| macro avg    | 0.910012 | 0.917074  | 0.904313 | 2077.0  |
| micro avg    | 0.921552 | 0.921552  | 0.921552 | 2077.0  |
| weighted avg | 0.921272 | 0.921585  | 0.921552 | 2077.0  |

The result of Model Number:Dataset Number:Featuregroup Number:Rescale of 8 : 1 : 4 : 1

|              | f1-score | precision | recall   | support |
|--------------|----------|-----------|----------|---------|
| AFIB         | 0.676369 | 0.683885  | 0.669364 | 204.0   |
| GSVT         | 0.697320 | 0.693350  | 0.701538 | 300.0   |
| SB           | 0.711192 | 0.710239  | 0.712149 | 892.0   |
| SR           | 0.705142 | 0.706087  | 0.704209 | 681.0   |
| macro avg    | 0.697506 | 0.698390  | 0.696815 | 2077.0  |
| micro avg    | 0.703811 | 0.703811  | 0.703811 | 2077.0  |
| weighted avg | 0.703785 | 0.703850  | 0.703811 | 2077.0  |

The result of Model Number:Dataset Number:Featuregroup Number:Rescale of 8 : 1 : 5 : 0

|              | f1-score | precision | recall   | support |
|--------------|----------|-----------|----------|---------|
| AFIB         | 0.831917 | 0.816365  | 0.848161 | 875.0   |
| GSVT         | 0.861057 | 0.874651  | 0.847988 | 691.0   |
| SB           | 0.915698 | 0.914062  | 0.917348 | 1553.0  |
| SR           | 0.892423 | 0.901877  | 0.883170 | 907.0   |
| macro avg    | 0.875274 | 0.876739  | 0.874167 | 4026.0  |
| micro avg    | 0.882707 | 0.882707  | 0.882707 | 4026.0  |
| weighted avg | 0.882867 | 0.883319  | 0.882707 | 4026.0  |

The result of Model Number:Dataset Number:Featuregroup Number:Rescale of 8 : 1 : 5 : 1

|              | f1-score | precision | recall   | support |
|--------------|----------|-----------|----------|---------|
| AFIB         | 0.856960 | 0.872709  | 0.841875 | 204.0   |
| GSVT         | 0.871355 | 0.865648  | 0.877160 | 300.0   |
| SB           | 0.886260 | 0.881932  | 0.890631 | 892.0   |
| SR           | 0.877099 | 0.880746  | 0.873495 | 681.0   |
| macro avg    | 0.872918 | 0.875259  | 0.870790 | 2077.0  |
| micro avg    | 0.878278 | 0.878278  | 0.878278 | 2077.0  |
| weighted avg | 0.878225 | 0.878285  | 0.878278 | 2077.0  |

The result of Model Number:Dataset Number:Featuregroup Number:Rescale of 8 : 1 : 6 : 0

|      | f1-score | precision | recall   | support |
|------|----------|-----------|----------|---------|
| AFIB | 0.709951 | 0.733527  | 0.688112 | 204.0   |
| GSVT | 0.736894 | 0.730982  | 0.743013 | 300.0   |
| SB   | 0.753174 | 0.750080  | 0.756297 | 892.0   |

SR 0.746140 0.746031 0.746250 681.0  
macro avg 0.736540 0.740155 0.733418 2077.0  
micro avg 0.744387 0.744387 0.744387 2077.0  
weighted avg 0.744271 0.744368 0.744387 2077.0

The result of Model Number:Dataset Number:Featuregroup Number:Rescale of 8 : 1 : 6 : 1

f1-score precision recall support  
AFIB 0.747434 0.757542 0.737906 204.0  
GSVT 0.775825 0.774565 0.777115 300.0  
SB 0.792673 0.791617 0.793739 892.0  
SR 0.784571 0.783565 0.785606 681.0  
macro avg 0.775126 0.776822 0.773592 2077.0  
micro avg 0.783187 0.783187 0.783187 2077.0  
weighted avg 0.783139 0.783167 0.783187 2077.0

The result of Model Number:Dataset Number:Featuregroup Number:Rescale of 8 : 1 : 7 : 0

f1-score precision recall support  
AFIB 0.589801 0.642496 0.622843 204.0  
GSVT 0.801113 0.788017 0.814928 300.0  
SB 0.681995 0.676800 0.687320 892.0  
SR 0.833968 0.824532 0.843648 681.0  
macro avg 0.726719 0.732961 0.742185 2077.0  
micro avg 0.750675 0.750675 0.750675 2077.0  
weighted avg 0.739973 0.737933 0.750675 2077.0

The result of Model Number:Dataset Number:Featuregroup Number:Rescale of 8 : 1 : 7 : 1

f1-score precision recall support  
AFIB 0.879937 0.875506 0.884451 875.0  
GSVT 0.897076 0.901419 0.892789 691.0  
SB 0.955441 0.953242 0.957653 1553.0  
SR 0.931522 0.936506 0.926601 907.0  
macro avg 0.915994 0.916668 0.915374 4026.0  
micro avg 0.923615 0.923615 0.923615 4026.0  
weighted avg 0.923625 0.923682 0.923615 4026.0

The result of Model Number:Dataset Number:Featuregroup Number:Rescale of 8 : 1 : 8 : 0

f1-score precision recall support  
AFIB 0.712621 0.726917 0.699019 204.0  
GSVT 0.729136 0.721557 0.736915 300.0  
SB 0.742622 0.739733 0.745535 892.0  
SR 0.734818 0.737884 0.731794 681.0  
macro avg 0.729799 0.731523 0.728316 2077.0  
micro avg 0.735216 0.735216 0.735216 2077.0  
weighted avg 0.735169 0.735243 0.735216 2077.0

The result of Model Number:Dataset Number:Featuregroup Number:Rescale of 8 : 1 : 8 : 1

f1-score precision recall support  
AFIB 0.790106 0.792173 0.788206 204.0

GSVT 0.807933 0.804805 0.811153 300.0  
SB 0.826053 0.824950 0.827162 892.0  
SR 0.819437 0.821739 0.817151 681.0  
macro avg 0.810882 0.810917 0.810918 2077.0  
micro avg 0.817741 0.817741 0.817741 2077.0  
weighted avg 0.817736 0.817768 0.817741 2077.0

The result of Model Number:Dataset Number:Featuregroup Number:Rescale of 8 : 1 : 9 : 0

f1-score precision recall support

AFIB 0.738476 0.748048 0.729341 204.0  
GSVT 0.767050 0.766554 0.767569 300.0  
SB 0.783212 0.781558 0.784878 892.0  
SR 0.775335 0.774895 0.775793 681.0  
macro avg 0.766018 0.767764 0.764395 2077.0  
micro avg 0.773945 0.773945 0.773945 2077.0  
weighted avg 0.773901 0.773915 0.773945 2077.0

The result of Model Number:Dataset Number:Featuregroup Number:Rescale of 8 : 1 : 9 : 1

f1-score precision recall support

AFIB 0.704790 0.706011 0.703583 875.0  
GSVT 0.713335 0.705138 0.721783 691.0  
SB 0.751167 0.742109 0.760451 1553.0  
SR 0.715461 0.737140 0.695038 907.0  
macro avg 0.721188 0.722599 0.720214 4026.0  
micro avg 0.726718 0.726718 0.726718 4026.0  
weighted avg 0.726550 0.726799 0.726718 4026.0

The result of Model Number:Dataset Number:Featuregroup Number:Rescale of 8 : 1 : 10 : 0

f1-score precision recall support

AFIB 0.739368 0.756259 0.723402 204.0  
GSVT 0.772956 0.768145 0.777848 300.0  
SB 0.789650 0.787201 0.792126 892.0  
SR 0.780607 0.780968 0.780267 681.0  
macro avg 0.770645 0.773143 0.768411 2077.0  
micro avg 0.779425 0.779425 0.779425 2077.0  
weighted avg 0.779335 0.779366 0.779425 2077.0

The result of Model Number:Dataset Number:Featuregroup Number:Rescale of 8 : 1 : 10 : 1

f1-score precision recall support

AFIB 0.145970 0.147503 0.144469 175.0  
GSVT 0.146205 0.144652 0.147792 138.2  
SB 0.153980 0.153389 0.154575 310.6  
SR 0.150416 0.151170 0.149670 181.4  
macro avg 0.149143 0.149179 0.149126 805.2  
micro avg 0.150109 0.150109 0.150109 805.2

weighted avg 0.150102 0.150110 0.150109 805.2

The result of Model Number:Dataset Number:Featuregroup Number:Rescale of 9 : 0 : 0 : 0

f1-score precision recall support

AFIB 0.671617 0.664861 0.678530 875.0  
GSVT 0.677627 0.683661 0.671749 691.0  
SB 0.716900 0.714699 0.719115 1553.0  
SR 0.703017 0.709171 0.696972 907.0  
macro avg 0.692290 0.693098 0.691591 4026.0  
micro avg 0.697176 0.697176 0.697176 4026.0  
weighted avg 0.697190 0.697295 0.697176 4026.0

The result of Model Number:Dataset Number:Featuregroup Number:Rescale of 9 : 0 : 0 : 1

f1-score precision recall support

AFIB 0.669342 0.662111 0.761934 204.0  
GSVT 0.800824 0.794585 0.807232 300.0  
SB 0.653549 0.652182 0.654923 892.0  
SR 0.810415 0.810188 0.810653 681.0  
macro avg 0.733533 0.729766 0.758685 2077.0  
micro avg 0.738493 0.738493 0.738493 2077.0  
weighted avg 0.727805 0.725532 0.738493 2077.0

The result of Model Number:Dataset Number:Featuregroup Number:Rescale of 9 : 0 : 1 : 0

f1-score precision recall support

AFIB 0.686829 0.690099 0.683619 875.0  
GSVT 0.695313 0.682677 0.708497 691.0  
SB 0.735694 0.732877 0.738535 1553.0  
SR 0.713949 0.726169 0.702144 907.0  
macro avg 0.707946 0.707955 0.708199 4026.0  
micro avg 0.713246 0.713246 0.713246 4026.0  
weighted avg 0.713244 0.713452 0.713246 4026.0

The result of Model Number:Dataset Number:Featuregroup Number:Rescale of 9 : 0 : 1 : 1

f1-score precision recall support

AFIB 0.808092 0.830833 0.786728 204.0  
GSVT 0.828984 0.823165 0.835042 300.0  
SB 0.851781 0.848372 0.855218 892.0  
SR 0.840459 0.840984 0.839959 681.0  
macro avg 0.832329 0.835839 0.829237 2077.0  
micro avg 0.840574 0.840574 0.840574 2077.0  
weighted avg 0.840485 0.840586 0.840574 2077.0

The result of Model Number:Dataset Number:Featuregroup Number:Rescale of 9 : 0 : 2 : 0

f1-score precision recall support

AFIB 0.662944 0.708210 0.623401 204.0  
GSVT 0.700798 0.686518 0.715747 300.0  
SB 0.718180 0.711884 0.724616 892.0  
SR 0.700465 0.702798 0.698210 681.0

macro avg 0.695597 0.702352 0.690493 2077.0  
micro avg 0.704736 0.704736 0.704736 2077.0  
weighted avg 0.704436 0.704880 0.704736 2077.0

The result of Model Number:Dataset Number:Featuregroup Number:Rescale of 9 : 0 : 2 : 1

f1-score precision recall support  
AFIB 0.689017 0.703529 0.675200 204.0  
GSVT 0.710439 0.703949 0.717067 300.0  
SB 0.722042 0.720432 0.723661 892.0  
SR 0.713461 0.714207 0.712725 681.0  
macro avg 0.708740 0.710529 0.707163 2077.0  
micro avg 0.714363 0.714363 0.714363 2077.0  
weighted avg 0.714309 0.714350 0.714363 2077.0

The result of Model Number:Dataset Number:Featuregroup Number:Rescale of 9 : 0 : 3 : 0

f1-score precision recall support  
AFIB 0.746882 0.724559 0.796371 875.0  
GSVT 0.639594 0.625588 0.654479 691.0  
SB 0.848345 0.841433 0.855597 1553.0  
SR 0.795870 0.829284 0.766538 907.0  
macro avg 0.757673 0.755216 0.768246 4026.0  
micro avg 0.788142 0.788142 0.788142 4026.0  
weighted avg 0.778643 0.776248 0.788142 4026.0

The result of Model Number:Dataset Number:Featuregroup Number:Rescale of 9 : 0 : 3 : 1

f1-score precision recall support  
AFIB 0.875786 0.864057 0.887893 875.0  
GSVT 0.895367 0.902355 0.888501 691.0  
SB 0.950630 0.947656 0.953628 1553.0  
SR 0.927641 0.939939 0.915678 907.0  
macro avg 0.912356 0.913502 0.911425 4026.0  
micro avg 0.919614 0.919614 0.919614 4026.0  
weighted avg 0.919700 0.919973 0.919614 4026.0

The result of Model Number:Dataset Number:Featuregroup Number:Rescale of 9 : 0 : 4 : 0

f1-score precision recall support  
AFIB 0.707023 0.710904 0.703230 875.0  
GSVT 0.708012 0.699061 0.717306 691.0  
SB 0.744597 0.741609 0.747616 1553.0  
SR 0.728613 0.737458 0.720023 907.0  
macro avg 0.722061 0.722258 0.722044 4026.0  
micro avg 0.726551 0.726551 0.726551 4026.0  
weighted avg 0.726551 0.726698 0.726551 4026.0

The result of Model Number:Dataset Number:Featuregroup Number:Rescale of 9 : 0 : 4 : 1

f1-score precision recall support  
AFIB 0.899628 0.939611 0.863033 204.0  
GSVT 0.937117 0.929761 0.944612 300.0

SB 0.951432 0.944093 0.958895 892.0  
SR 0.940906 0.942460 0.939391 681.0  
macro avg 0.932271 0.938981 0.926483 2077.0  
micro avg 0.941022 0.941022 0.941022 2077.0  
weighted avg 0.940825 0.941047 0.941022 2077.0

The result of Model Number:Dataset Number:Featuregroup Number:Rescale of 9 : 0 : 5 : 0

f1-score precision recall support

AFIB 0.844314 0.833456 0.855519 875.0  
GSVT 0.861501 0.868633 0.854520 691.0  
SB 0.921118 0.917018 0.925265 1553.0  
SR 0.894905 0.908141 0.882071 907.0  
macro avg 0.880460 0.881812 0.879344 4026.0  
micro avg 0.888234 0.888234 0.888234 4026.0  
weighted avg 0.888288 0.888552 0.888234 4026.0

The result of Model Number:Dataset Number:Featuregroup Number:Rescale of 9 : 0 : 5 : 1

f1-score precision recall support

AFIB 0.725943 0.750051 0.703613 204.0  
GSVT 0.753493 0.747448 0.759750 300.0  
SB 0.770141 0.766976 0.773334 892.0  
SR 0.762948 0.762836 0.763060 681.0  
macro avg 0.753131 0.756828 0.749939 2077.0  
micro avg 0.761155 0.761155 0.761155 2077.0  
weighted avg 0.761037 0.761136 0.761155 2077.0

The result of Model Number:Dataset Number:Featuregroup Number:Rescale of 9 : 0 : 6 : 0

f1-score precision recall support

AFIB 0.787993 0.830858 0.749535 204.0  
GSVT 0.827247 0.814736 0.840182 300.0  
SB 0.846906 0.841396 0.852500 892.0  
SR 0.836457 0.837211 0.835724 681.0  
macro avg 0.824651 0.831050 0.819486 2077.0  
micro avg 0.835108 0.835108 0.835108 2077.0  
weighted avg 0.834854 0.835138 0.835108 2077.0

The result of Model Number:Dataset Number:Featuregroup Number:Rescale of 9 : 0 : 6 : 1

f1-score precision recall support

AFIB 0.817841 0.816863 0.818960 875.0  
GSVT 0.833784 0.836652 0.831021 691.0  
SB 0.883101 0.877661 0.888616 1553.0  
SR 0.865130 0.873579 0.856938 907.0  
macro avg 0.849964 0.851189 0.848884 4026.0  
micro avg 0.856455 0.856455 0.856455 4026.0  
weighted avg 0.856404 0.856489 0.856455 4026.0

The result of Model Number:Dataset Number:Featuregroup Number:Rescale of 9 : 0 : 7 : 0

f1-score precision recall support

AFIB 0.651244 0.656406 0.646179 875.0  
GSVT 0.659500 0.656593 0.662456 691.0  
SB 0.701301 0.698528 0.704100 1553.0  
SR 0.684067 0.686000 0.682179 907.0  
macro avg 0.674028 0.674382 0.673728 4026.0  
micro avg 0.679426 0.679426 0.679426 4026.0  
weighted avg 0.679365 0.679354 0.679426 4026.0

The result of Model Number:Dataset Number:Featuregroup Number:Rescale of 9 : 0 : 7 : 1

f1-score precision recall support

AFIB 0.885645 0.909953 0.862667 204.0  
GSVT 0.905675 0.891762 0.920116 300.0  
SB 0.925574 0.916621 0.934705 892.0  
SR 0.902181 0.913454 0.891189 681.0  
macro avg 0.904769 0.907948 0.902169 2077.0  
micro avg 0.911255 0.911255 0.911255 2077.0  
weighted avg 0.911108 0.911337 0.911255 2077.0

The result of Model Number:Dataset Number:Featuregroup Number:Rescale of 9 : 0 : 8 : 0

f1-score precision recall support

AFIB 0.690220 0.720511 0.662546 204.0  
GSVT 0.642550 0.647176 0.638253 300.0  
SB 0.666375 0.632912 0.703577 892.0  
SR 0.591179 0.630211 0.556824 681.0  
macro avg 0.647581 0.657703 0.640300 2077.0  
micro avg 0.641995 0.641995 0.641995 2077.0  
weighted avg 0.640621 0.642691 0.641995 2077.0

The result of Model Number:Dataset Number:Featuregroup Number:Rescale of 9 : 0 : 8 : 1

f1-score precision recall support

AFIB 0.893685 0.901139 0.886661 204.0  
GSVT 0.917293 0.913069 0.921576 300.0  
SB 0.931127 0.927819 0.934464 892.0  
SR 0.922527 0.926659 0.918480 681.0  
macro avg 0.916158 0.917171 0.915295 2077.0  
micro avg 0.922666 0.922666 0.922666 2077.0  
weighted avg 0.922632 0.922688 0.922666 2077.0

The result of Model Number:Dataset Number:Featuregroup Number:Rescale of 9 : 0 : 9 : 0

f1-score precision recall support

AFIB 0.612235 0.676272 0.559455 204.0  
GSVT 0.720252 0.710742 0.730096 300.0  
SB 0.763824 0.760856 0.766821 892.0  
SR 0.745470 0.734845 0.756414 681.0  
macro avg 0.710445 0.720679 0.703197 2077.0  
micro avg 0.737737 0.737737 0.737737 2077.0  
weighted avg 0.736624 0.736782 0.737737 2077.0

The result of Model Number:Dataset Number:Featuregroup Number:Rescale of 9 : 0 : 9 : 1

|              | f1-score | precision | recall   | support |
|--------------|----------|-----------|----------|---------|
| AFIB         | 0.783278 | 0.760711  | 0.859407 | 875.0   |
| GSVT         | 0.863277 | 0.860520  | 0.866164 | 691.0   |
| SB           | 0.728733 | 0.717994  | 0.739858 | 1553.0  |
| SR           | 0.872571 | 0.889602  | 0.856289 | 907.0   |
| macro avg    | 0.811965 | 0.807207  | 0.830429 | 4026.0  |
| micro avg    | 0.813749 | 0.813749  | 0.813749 | 4026.0  |
| weighted avg | 0.796085 | 0.790401  | 0.813749 | 4026.0  |

The result of Model Number:Dataset Number:Featuregroup Number:Rescale of 9 : 0 : 10 : 0

|              | f1-score | precision | recall   | support |
|--------------|----------|-----------|----------|---------|
| AFIB         | 0.648783 | 0.639797  | 0.658052 | 875.0   |
| GSVT         | 0.663173 | 0.668540  | 0.657894 | 691.0   |
| SB           | 0.703950 | 0.701927  | 0.705989 | 1553.0  |
| SR           | 0.686825 | 0.695764  | 0.678119 | 907.0   |
| macro avg    | 0.675683 | 0.676507  | 0.675013 | 4026.0  |
| micro avg    | 0.681037 | 0.681037  | 0.681037 | 4026.0  |
| weighted avg | 0.681103 | 0.681305  | 0.681037 | 4026.0  |

The result of Model Number:Dataset Number:Featuregroup Number:Rescale of 9 : 0 : 10 : 1

|              | f1-score | precision | recall   | support |
|--------------|----------|-----------|----------|---------|
| AFIB         | 0.757965 | 0.782587  | 0.734989 | 204.0   |
| GSVT         | 0.772334 | 0.765420  | 0.779527 | 300.0   |
| SB           | 0.790699 | 0.785279  | 0.796195 | 892.0   |
| SR           | 0.777803 | 0.781085  | 0.774595 | 681.0   |
| macro avg    | 0.774700 | 0.778593  | 0.771326 | 2077.0  |
| micro avg    | 0.780694 | 0.780694  | 0.780694 | 2077.0  |
| weighted avg | 0.780603 | 0.780771  | 0.780694 | 2077.0  |

The result of Model Number:Dataset Number:Featuregroup Number:Rescale of 9 : 1 : 0 : 0

|              | f1-score | precision | recall   | support |
|--------------|----------|-----------|----------|---------|
| AFIB         | 0.677390 | 0.677053  | 0.677759 | 875.0   |
| GSVT         | 0.685817 | 0.690405  | 0.681343 | 691.0   |
| SB           | 0.727060 | 0.725389  | 0.728742 | 1553.0  |
| SR           | 0.706001 | 0.705834  | 0.706291 | 907.0   |
| macro avg    | 0.699067 | 0.699670  | 0.698534 | 4026.0  |
| micro avg    | 0.704468 | 0.704468  | 0.704468 | 4026.0  |
| weighted avg | 0.704442 | 0.704474  | 0.704468 | 4026.0  |

The result of Model Number:Dataset Number:Featuregroup Number:Rescale of 9 : 1 : 0 : 1

|      | f1-score | precision | recall   | support |
|------|----------|-----------|----------|---------|
| AFIB | 0.802915 | 0.808325  | 0.797696 | 875.0   |
| GSVT | 0.817244 | 0.805893  | 0.829070 | 691.0   |
| SB   | 0.870863 | 0.864900  | 0.876916 | 1553.0  |



SR 0.835572 0.850005 0.821666 907.0  
macro avg 0.831648 0.832280 0.831337 4026.0  
micro avg 0.839040 0.839040 0.839040 4026.0  
weighted avg 0.838942 0.839121 0.839040 4026.0

The result of Model Number:Dataset Number:Featuregroup Number:Rescale of 9 : 1 : 1 : 0

f1-score precision recall support  
AFIB 0.853725 0.855996 0.851518 875.0  
GSVT 0.870142 0.864012 0.876411 691.0  
SB 0.919843 0.910464 0.929435 1553.0  
SR 0.877795 0.896915 0.859505 907.0  
macro avg 0.880376 0.881847 0.879217 4026.0  
micro avg 0.887646 0.887646 0.887646 4026.0  
weighted avg 0.887470 0.887601 0.887646 4026.0

The result of Model Number:Dataset Number:Featuregroup Number:Rescale of 9 : 1 : 1 : 1

f1-score precision recall support  
AFIB 0.739600 0.755846 0.724314 204.0  
GSVT 0.763435 0.757265 0.769812 300.0  
SB 0.779435 0.778477 0.780397 892.0  
SR 0.772855 0.772183 0.773533 681.0  
macro avg 0.763831 0.765942 0.762014 2077.0  
micro avg 0.771109 0.771109 0.771109 2077.0  
weighted avg 0.771054 0.771126 0.771109 2077.0

The result of Model Number:Dataset Number:Featuregroup Number:Rescale of 9 : 1 : 2 : 0

f1-score precision recall support  
AFIB 0.707260 0.730235 0.685820 204.0  
GSVT 0.720667 0.714216 0.727379 300.0  
SB 0.737804 0.732747 0.742932 892.0  
SR 0.725771 0.728833 0.722777 681.0  
macro avg 0.722876 0.726508 0.719727 2077.0  
micro avg 0.728468 0.728468 0.728468 2077.0  
weighted avg 0.728383 0.728540 0.728468 2077.0

The result of Model Number:Dataset Number:Featuregroup Number:Rescale of 9 : 1 : 2 : 1

f1-score precision recall support  
AFIB 0.844666 0.881248 0.811240 204.0  
GSVT 0.789616 0.796985 0.782778 300.0  
SB 0.818494 0.778253 0.863181 892.0  
SR 0.729500 0.775537 0.688858 681.0  
macro avg 0.795569 0.808006 0.786514 2077.0  
micro avg 0.789310 0.789310 0.789310 2077.0  
weighted avg 0.787714 0.790184 0.789310 2077.0

The result of Model Number:Dataset Number:Featuregroup Number:Rescale of 9 : 1 : 3 : 0

f1-score precision recall support  
AFIB 0.693953 0.706832 0.681708 204.0

GSVT 0.709212 0.705494 0.712985 300.0  
SB 0.720535 0.717974 0.723119 892.0  
SR 0.713117 0.714402 0.711867 681.0  
macro avg 0.709204 0.711175 0.707420 2077.0  
micro avg 0.713899 0.713899 0.713899 2077.0  
weighted avg 0.713857 0.713906 0.713899 2077.0

The result of Model Number:Dataset Number:Featuregroup Number:Rescale of 9 : 1 : 3 : 1

f1-score precision recall support

AFIB 0.690008 0.673926 0.706987 875.0  
GSVT 0.662383 0.669664 0.655303 691.0  
SB 0.697052 0.652041 0.748755 1553.0  
SR 0.557881 0.669908 0.478253 907.0  
macro avg 0.651831 0.666385 0.647324 4026.0  
micro avg 0.662697 0.662697 0.662697 4026.0  
weighted avg 0.658217 0.663847 0.662697 4026.0

The result of Model Number:Dataset Number:Featuregroup Number:Rescale of 9 : 1 : 4 : 0

f1-score precision recall support

AFIB 0.758219 0.740548 0.776877 875.0  
GSVT 0.727864 0.735865 0.720084 691.0  
SB 0.765960 0.716499 0.822774 1553.0  
SR 0.613032 0.736133 0.525531 907.0  
macro avg 0.716269 0.732261 0.711317 4026.0  
micro avg 0.728209 0.728209 0.728209 4026.0  
weighted avg 0.723287 0.729473 0.728209 4026.0

The result of Model Number:Dataset Number:Featuregroup Number:Rescale of 9 : 1 : 4 : 1

f1-score precision recall support

AFIB 0.849303 0.851562 0.847108 875.0  
GSVT 0.865635 0.859537 0.871872 691.0  
SB 0.915078 0.905748 0.924621 1553.0  
SR 0.873249 0.892270 0.855053 907.0  
macro avg 0.875816 0.877279 0.874663 4026.0  
micro avg 0.883048 0.883048 0.883048 4026.0  
weighted avg 0.882873 0.883004 0.883048 4026.0

The result of Model Number:Dataset Number:Featuregroup Number:Rescale of 9 : 1 : 5 : 0

f1-score precision recall support

AFIB 0.877248 0.889332 0.865874 875.0  
GSVT 0.896399 0.892687 0.900385 691.0  
SB 0.954805 0.942286 0.967701 1553.0  
SR 0.924828 0.938639 0.911828 907.0  
macro avg 0.913320 0.915736 0.911447 4026.0  
micro avg 0.921429 0.921429 0.921429 4026.0  
weighted avg 0.921171 0.921443 0.921429 4026.0

The result of Model Number:Dataset Number:Featuregroup Number:Rescale of 9 : 1 : 5 : 1

f1-score precision recall support  
AFIB 0.830809 0.830759 0.830911 875.0  
GSVT 0.832607 0.828106 0.837172 691.0  
SB 0.872384 0.866579 0.878278 1553.0  
SR 0.849219 0.863152 0.835760 907.0  
macro avg 0.846255 0.847149 0.845530 4026.0  
micro avg 0.851350 0.851350 0.851350 4026.0  
weighted avg 0.851303 0.851419 0.851350 4026.0  
The result of Model Number:Dataset Number:Featuregroup Number:Rescale of 9 : 1 : 6 : 0

f1-score precision recall support  
AFIB 0.877319 0.893414 0.861861 204.0  
GSVT 0.888890 0.879919 0.898063 300.0  
SB 0.910785 0.906044 0.915582 892.0  
SR 0.898386 0.904015 0.892846 681.0  
macro avg 0.893845 0.895848 0.892088 2077.0  
micro avg 0.900321 0.900321 0.900321 2077.0  
weighted avg 0.900270 0.900365 0.900321 2077.0  
The result of Model Number:Dataset Number:Featuregroup Number:Rescale of 9 : 1 : 6 : 1

f1-score precision recall support  
AFIB 0.674302 0.696204 0.653870 204.0  
GSVT 0.692919 0.684084 0.702125 300.0  
SB 0.712468 0.709781 0.715183 892.0  
SR 0.702503 0.703775 0.701263 681.0  
macro avg 0.695548 0.698461 0.693110 2077.0  
micro avg 0.702711 0.702711 0.702711 2077.0  
weighted avg 0.702629 0.702767 0.702711 2077.0  
The result of Model Number:Dataset Number:Featuregroup Number:Rescale of 9 : 1 : 7 : 0

f1-score precision recall support  
AFIB 0.746743 0.718195 0.793716 875.0  
GSVT 0.773752 0.747048 0.809973 691.0  
SB 0.862104 0.846887 0.878825 1553.0  
SR 0.730182 0.878002 0.630414 907.0  
macro avg 0.778195 0.797533 0.778232 4026.0  
micro avg 0.792547 0.792547 0.792547 4026.0  
weighted avg 0.792148 0.808791 0.792547 4026.0  
The result of Model Number:Dataset Number:Featuregroup Number:Rescale of 9 : 1 : 7 : 1

f1-score precision recall support  
AFIB 0.676000 0.682235 0.670041 204.0  
GSVT 0.700714 0.700739 0.700708 300.0  
SB 0.715389 0.714119 0.716671 892.0  
SR 0.707797 0.707607 0.708004 681.0  
macro avg 0.699975 0.701175 0.698856 2077.0  
micro avg 0.706944 0.706944 0.706944 2077.0

weighted avg 0.706912 0.706920 0.706944 2077.0

The result of Model Number:Dataset Number:Featuregroup Number:Rescale of 9 : 1 : 8 : 0

f1-score precision recall support

|              |          |          |          |        |
|--------------|----------|----------|----------|--------|
| AFIB         | 0.757027 | 0.757387 | 0.756775 | 875.0  |
| GSVT         | 0.776632 | 0.769910 | 0.783500 | 691.0  |
| SB           | 0.829446 | 0.823401 | 0.835587 | 1553.0 |
| SR           | 0.794011 | 0.809795 | 0.778871 | 907.0  |
| macro avg    | 0.789279 | 0.790123 | 0.788683 | 4026.0 |
| micro avg    | 0.796741 | 0.796741 | 0.796741 | 4026.0 |
| weighted avg | 0.796659 | 0.796808 | 0.796741 | 4026.0 |

The result of Model Number:Dataset Number:Featuregroup Number:Rescale of 9 : 1 : 8 : 1

f1-score precision recall support

|              |          |          |          |        |
|--------------|----------|----------|----------|--------|
| AFIB         | 0.786749 | 0.801188 | 0.773200 | 204.0  |
| GSVT         | 0.816615 | 0.810049 | 0.823438 | 300.0  |
| SB           | 0.831763 | 0.830279 | 0.833255 | 892.0  |
| SR           | 0.823528 | 0.824261 | 0.822800 | 681.0  |
| macro avg    | 0.814664 | 0.816444 | 0.813173 | 2077.0 |
| micro avg    | 0.822511 | 0.822511 | 0.822511 | 2077.0 |
| weighted avg | 0.822454 | 0.822526 | 0.822511 | 2077.0 |

The result of Model Number:Dataset Number:Featuregroup Number:Rescale of 9 : 1 : 9 : 0

f1-score precision recall support

|              |          |          |          |        |
|--------------|----------|----------|----------|--------|
| AFIB         | 0.744780 | 0.749226 | 0.740407 | 204.0  |
| GSVT         | 0.763080 | 0.759803 | 0.766386 | 300.0  |
| SB           | 0.776149 | 0.775025 | 0.777279 | 892.0  |
| SR           | 0.769052 | 0.770640 | 0.767474 | 681.0  |
| macro avg    | 0.763265 | 0.763674 | 0.762886 | 2077.0 |
| micro avg    | 0.768869 | 0.768869 | 0.768869 | 2077.0 |
| weighted avg | 0.768853 | 0.768855 | 0.768869 | 2077.0 |

The result of Model Number:Dataset Number:Featuregroup Number:Rescale of 9 : 1 : 9 : 1

f1-score precision recall support

|              |          |          |          |        |
|--------------|----------|----------|----------|--------|
| AFIB         | 0.794868 | 0.798637 | 0.791141 | 875.0  |
| GSVT         | 0.804729 | 0.800932 | 0.808580 | 691.0  |
| SB           | 0.848801 | 0.847009 | 0.850605 | 1553.0 |
| SR           | 0.832716 | 0.835048 | 0.830417 | 907.0  |
| macro avg    | 0.820279 | 0.820406 | 0.820186 | 4026.0 |
| micro avg    | 0.825920 | 0.825920 | 0.825920 | 4026.0 |
| weighted avg | 0.825891 | 0.825893 | 0.825920 | 4026.0 |

The result of Model Number:Dataset Number:Featuregroup Number:Rescale of 9 : 1 : 10 : 0

f1-score precision recall support

|      |          |          |          |       |
|------|----------|----------|----------|-------|
| AFIB | 0.751451 | 0.758746 | 0.744760 | 204.0 |
| GSVT | 0.773976 | 0.770318 | 0.777874 | 300.0 |
| SB   | 0.789649 | 0.788768 | 0.790534 | 892.0 |

SR 0.782701 0.783512 0.781897 681.0  
macro avg 0.774445 0.775336 0.773766 2077.0  
micro avg 0.781378 0.781378 0.781378 2077.0  
weighted avg 0.781356 0.781431 0.781378 2077.0  
The result of Model Number:Dataset Number:Featuregroup Number:Rescale of 9 : 1 : 10 :  
1

f1-score precision recall support  
AFIB 0.827672 0.821299 0.834208 875.0  
GSVT 0.838418 0.842311 0.834744 691.0  
SB 0.898481 0.893702 0.903332 1553.0  
SR 0.872009 0.884269 0.860181 907.0  
macro avg 0.859145 0.860395 0.858116 4026.0  
micro avg 0.866815 0.866815 0.866815 4026.0  
weighted avg 0.866819 0.867020 0.866815 4026.0  
The result of Model Number:Dataset Number:Featuregroup Number:Rescale of 10 : 0 : 0 :  
0

f1-score precision recall support  
AFIB 0.852900 0.846991 0.859064 875.0  
GSVT 0.866058 0.869573 0.862712 691.0  
SB 0.939675 0.929904 0.949658 1553.0  
SR 0.892230 0.912991 0.872474 907.0  
macro avg 0.887716 0.889865 0.885977 4026.0  
micro avg 0.897657 0.897657 0.897657 4026.0  
weighted avg 0.897492 0.897719 0.897657 4026.0  
The result of Model Number:Dataset Number:Featuregroup Number:Rescale of 10 : 0 : 0 :  
1

f1-score precision recall support  
AFIB 0.862434 0.869956 0.855256 204.0  
GSVT 0.892260 0.890803 0.893743 300.0  
SB 0.911225 0.909003 0.913470 892.0  
SR 0.902871 0.904232 0.901545 681.0  
macro avg 0.892197 0.893498 0.891003 2077.0  
micro avg 0.900993 0.900993 0.900993 2077.0  
weighted avg 0.900955 0.900975 0.900993 2077.0  
The result of Model Number:Dataset Number:Featuregroup Number:Rescale of 10 : 0 : 1 :  
0

f1-score precision recall support  
AFIB 0.649452 0.649128 0.649805 875.0  
GSVT 0.657531 0.661930 0.653242 691.0  
SB 0.697073 0.695471 0.698686 1553.0  
SR 0.676883 0.676722 0.677161 907.0  
macro avg 0.670235 0.670813 0.669724 4026.0  
micro avg 0.675413 0.675413 0.675413 4026.0  
weighted avg 0.675388 0.675419 0.675413 4026.0

The result of Model Number:Dataset Number:Featuregroup Number:Rescale of 10 : 0 : 1 : 1

|              | f1-score | precision | recall   | support |
|--------------|----------|-----------|----------|---------|
| AFIB         | 0.738567 | 0.765834  | 0.713243 | 204.0   |
| GSVT         | 0.754353 | 0.746611  | 0.762374 | 300.0   |
| SB           | 0.775014 | 0.771400  | 0.778663 | 892.0   |
| SR           | 0.762930 | 0.763408  | 0.762478 | 681.0   |
| macro avg    | 0.757716 | 0.761813  | 0.754190 | 2077.0  |
| micro avg    | 0.764578 | 0.764578  | 0.764578 | 2077.0  |
| weighted avg | 0.764488 | 0.764652  | 0.764578 | 2077.0  |

The result of Model Number:Dataset Number:Featuregroup Number:Rescale of 10 : 0 : 2 : 0

|              | f1-score | precision | recall   | support |
|--------------|----------|-----------|----------|---------|
| AFIB         | 0.783119 | 0.804286  | 0.763201 | 204.0   |
| GSVT         | 0.789574 | 0.777951  | 0.801658 | 300.0   |
| SB           | 0.804869 | 0.796306  | 0.813620 | 892.0   |
| SR           | 0.789940 | 0.800795  | 0.779389 | 681.0   |
| macro avg    | 0.791876 | 0.794834  | 0.789467 | 2077.0  |
| micro avg    | 0.795717 | 0.795717  | 0.795717 | 2077.0  |
| weighted avg | 0.795629 | 0.795910  | 0.795717 | 2077.0  |

The result of Model Number:Dataset Number:Featuregroup Number:Rescale of 10 : 0 : 2 : 1

|              | f1-score | precision | recall   | support |
|--------------|----------|-----------|----------|---------|
| AFIB         | 0.773266 | 0.774564  | 0.792432 | 204.0   |
| GSVT         | 0.765996 | 0.795722  | 0.739400 | 300.0   |
| SB           | 0.812506 | 0.767947  | 0.862887 | 892.0   |
| SR           | 0.704269 | 0.769263  | 0.651185 | 681.0   |
| macro avg    | 0.764009 | 0.776874  | 0.761476 | 2077.0  |
| micro avg    | 0.768718 | 0.768718  | 0.768718 | 2077.0  |
| weighted avg | 0.766446 | 0.773040  | 0.768718 | 2077.0  |

The result of Model Number:Dataset Number:Featuregroup Number:Rescale of 10 : 0 : 3 : 0

|              | f1-score | precision | recall   | support |
|--------------|----------|-----------|----------|---------|
| AFIB         | 0.856860 | 0.867381  | 0.846724 | 204.0   |
| GSVT         | 0.874119 | 0.870385  | 0.877905 | 300.0   |
| SB           | 0.884700 | 0.882044  | 0.887375 | 892.0   |
| SR           | 0.877253 | 0.879341  | 0.875203 | 681.0   |
| macro avg    | 0.873233 | 0.874788  | 0.871802 | 2077.0  |
| micro avg    | 0.878024 | 0.878024  | 0.878024 | 2077.0  |
| weighted avg | 0.877995 | 0.878034  | 0.878024 | 2077.0  |

The result of Model Number:Dataset Number:Featuregroup Number:Rescale of 10 : 0 : 3 : 1

|      | f1-score | precision | recall   | support |
|------|----------|-----------|----------|---------|
| AFIB | 0.716645 | 0.743215  | 0.692012 | 204.0   |

GSVT 0.738115 0.728885 0.747674 300.0  
SB 0.756832 0.749926 0.763872 892.0  
SR 0.736934 0.742653 0.731310 681.0  
macro avg 0.737131 0.741170 0.733717 2077.0  
micro avg 0.743798 0.743798 0.743798 2077.0  
weighted avg 0.743657 0.743843 0.743798 2077.0  
The result of Model Number:Dataset Number:Featuregroup Number:Rescale of 10 : 0 : 4 :  
0

f1-score precision recall support  
AFIB 0.687307 0.687127 0.687553 875.0  
GSVT 0.701665 0.699012 0.704413 691.0  
SB 0.747028 0.743655 0.750443 1553.0  
SR 0.721852 0.730099 0.713817 907.0  
macro avg 0.714463 0.714973 0.714056 4026.0  
micro avg 0.720623 0.720623 0.720623 4026.0  
weighted avg 0.720591 0.720653 0.720623 4026.0  
The result of Model Number:Dataset Number:Featuregroup Number:Rescale of 10 : 0 : 4 :  
1

f1-score precision recall support  
AFIB 0.762839 0.754322 0.771559 875.0  
GSVT 0.778016 0.785142 0.771030 691.0  
SB 0.829790 0.827088 0.832513 1553.0  
SR 0.808279 0.816376 0.800343 907.0  
macro avg 0.794731 0.795732 0.793862 4026.0  
micro avg 0.801466 0.801466 0.801466 4026.0  
weighted avg 0.801507 0.801661 0.801466 4026.0  
The result of Model Number:Dataset Number:Featuregroup Number:Rescale of 10 : 0 : 5 :  
0

f1-score precision recall support  
AFIB 0.786598 0.789305 0.784009 875.0  
GSVT 0.801531 0.785540 0.818332 691.0  
SB 0.848485 0.843897 0.853129 1553.0  
SR 0.815667 0.834632 0.797594 907.0  
macro avg 0.813070 0.813343 0.813266 4026.0  
micro avg 0.819623 0.819623 0.819623 4026.0  
weighted avg 0.819583 0.819929 0.819623 4026.0  
The result of Model Number:Dataset Number:Featuregroup Number:Rescale of 10 : 0 : 5 :  
1

f1-score precision recall support  
AFIB 0.646059 0.715844 0.588790 204.0  
GSVT 0.748920 0.736740 0.761628 300.0  
SB 0.798677 0.795041 0.802348 892.0  
SR 0.779379 0.769462 0.789567 681.0  
macro avg 0.743259 0.754272 0.735583 2077.0

micro avg 0.771301 0.771301 0.771301 2077.0  
weighted avg 0.770173 0.770455 0.771301 2077.0  
The result of Model Number:Dataset Number:Featuregroup Number:Rescale of 10 : 0 : 6 :  
0

|              | f1-score | precision | recall   | support |
|--------------|----------|-----------|----------|---------|
| AFIB         | 0.737178 | 0.739868  | 0.734556 | 875.0   |
| GSVT         | 0.749919 | 0.740154  | 0.760009 | 691.0   |
| SB           | 0.790490 | 0.781784  | 0.799398 | 1553.0  |
| SR           | 0.749158 | 0.769853  | 0.729587 | 907.0   |
| macro avg    | 0.756686 | 0.757915  | 0.755888 | 4026.0  |
| micro avg    | 0.762818 | 0.762818  | 0.762818 | 4026.0  |
| weighted avg | 0.762628 | 0.762841  | 0.762818 | 4026.0  |

The result of Model Number:Dataset Number:Featuregroup Number:Rescale of 10 : 0 : 6 :  
1

|              | f1-score | precision | recall   | support |
|--------------|----------|-----------|----------|---------|
| AFIB         | 0.822452 | 0.836125  | 0.809407 | 204.0   |
| GSVT         | 0.838222 | 0.832267  | 0.844326 | 300.0   |
| SB           | 0.857664 | 0.852844  | 0.862559 | 892.0   |
| SR           | 0.846738 | 0.851918  | 0.841647 | 681.0   |
| macro avg    | 0.841269 | 0.843289  | 0.839485 | 2077.0  |
| micro avg    | 0.847848 | 0.847848  | 0.847848 | 2077.0  |
| weighted avg | 0.847815 | 0.847926  | 0.847848 | 2077.0  |

The result of Model Number:Dataset Number:Featuregroup Number:Rescale of 10 : 0 : 7 :  
0

|              | f1-score | precision | recall   | support |
|--------------|----------|-----------|----------|---------|
| AFIB         | 0.672146 | 0.700209  | 0.646368 | 875.0   |
| GSVT         | 0.726152 | 0.722476  | 0.729954 | 691.0   |
| SB           | 0.796248 | 0.791767  | 0.800802 | 1553.0  |
| SR           | 0.745567 | 0.729011  | 0.762904 | 907.0   |
| macro avg    | 0.735028 | 0.735866  | 0.735007 | 4026.0  |
| micro avg    | 0.746540 | 0.746540  | 0.746540 | 4026.0  |
| weighted avg | 0.745828 | 0.745837  | 0.746540 | 4026.0  |

The result of Model Number:Dataset Number:Featuregroup Number:Rescale of 10 : 0 : 7 :  
1

|              | f1-score | precision | recall   | support |
|--------------|----------|-----------|----------|---------|
| AFIB         | 0.928799 | 0.938700  | 0.919257 | 204.0   |
| GSVT         | 0.945880 | 0.940692  | 0.951232 | 300.0   |
| SB           | 0.967714 | 0.966101  | 0.969339 | 892.0   |
| SR           | 0.959647 | 0.961211  | 0.958102 | 681.0   |
| macro avg    | 0.950510 | 0.951676  | 0.949482 | 2077.0  |
| micro avg    | 0.958120 | 0.958120  | 0.958120 | 2077.0  |
| weighted avg | 0.958093 | 0.958136  | 0.958120 | 2077.0  |

The result of Model Number:Dataset Number:Featuregroup Number:Rescale of 10 : 0 : 8 :  
0



f1-score precision recall support  
AFIB 0.891804 0.890987 0.892728 875.0  
GSVT 0.910083 0.908318 0.911951 691.0  
SB 0.965717 0.963566 0.967892 1553.0  
SR 0.939358 0.945486 0.933343 907.0  
macro avg 0.926740 0.927089 0.926479 4026.0  
micro avg 0.934171 0.934171 0.934171 4026.0  
weighted avg 0.934166 0.934236 0.934171 4026.0  
The result of Model Number:Dataset Number:Featuregroup Number:Rescale of 10 : 0 : 8 :  
1

f1-score precision recall support  
AFIB 0.776085 0.764185 0.788490 875.0  
GSVT 0.802845 0.810715 0.795285 691.0  
SB 0.854442 0.852446 0.856474 1553.0  
SR 0.833097 0.843661 0.822814 907.0  
macro avg 0.816617 0.817752 0.815766 4026.0  
micro avg 0.823613 0.823613 0.823613 4026.0  
weighted avg 0.823748 0.824122 0.823613 4026.0  
The result of Model Number:Dataset Number:Featuregroup Number:Rescale of 10 : 0 : 9 :  
0

f1-score precision recall support  
AFIB 0.746454 0.739624 0.753443 875.0  
GSVT 0.756018 0.762689 0.749576 691.0  
SB 0.803623 0.799386 0.807916 1553.0  
SR 0.785457 0.794922 0.776285 907.0  
macro avg 0.772888 0.774155 0.771805 4026.0  
micro avg 0.778938 0.778938 0.778938 4026.0  
weighted avg 0.778935 0.779094 0.778938 4026.0  
The result of Model Number:Dataset Number:Featuregroup Number:Rescale of 10 : 0 : 9 :  
1

f1-score precision recall support  
AFIB 0.866355 0.882276 0.851104 204.0  
GSVT 0.880907 0.875138 0.886776 300.0  
SB 0.895975 0.891601 0.900395 892.0  
SR 0.886714 0.890401 0.883071 681.0  
macro avg 0.882488 0.884854 0.880336 2077.0  
micro avg 0.887906 0.887906 0.887906 2077.0  
weighted avg 0.887853 0.887914 0.887906 2077.0  
The result of Model Number:Dataset Number:Featuregroup Number:Rescale of 10 : 0 :  
10 : 0

f1-score precision recall support  
AFIB 0.843985 0.878050 0.812531 204.0  
GSVT 0.875392 0.861172 0.890241 300.0  
SB 0.898039 0.890819 0.905388 892.0

SR 0.873878 0.880171 0.867721 681.0  
macro avg 0.872823 0.877553 0.868970 2077.0  
micro avg 0.881730 0.881730 0.881730 2077.0  
weighted avg 0.881537 0.881791 0.881730 2077.0  
The result of Model Number:Dataset Number:Featuregroup Number:Rescale of 10 : 0 :

10 : 1

f1-score precision recall support

AFIB 0.870632 0.862470 0.879061 875.0  
GSVT 0.825443 0.805603 0.886122 691.0  
SB 0.954471 0.950965 0.958028 1553.0  
SR 0.742370 0.747576 0.737246 907.0  
macro avg 0.848229 0.841654 0.865114 4026.0  
micro avg 0.878785 0.878785 0.878785 4026.0  
weighted avg 0.866321 0.860962 0.878785 4026.0

The result of Model Number:Dataset Number:Featuregroup Number:Rescale of 10 : 1 : 0 :  
0

f1-score precision recall support

AFIB 0.819481 0.823780 0.815276 875.0  
GSVT 0.836616 0.835114 0.838184 691.0  
SB 0.908422 0.901455 0.915499 1553.0  
SR 0.876372 0.885144 0.867778 907.0  
macro avg 0.860223 0.861373 0.859184 4026.0  
micro avg 0.869696 0.869696 0.869696 4026.0  
weighted avg 0.869547 0.869512 0.869696 4026.0

The result of Model Number:Dataset Number:Featuregroup Number:Rescale of 10 : 1 : 0 :  
1

f1-score precision recall support

AFIB 0.700016 0.699973 0.700102 875.0  
GSVT 0.701531 0.697738 0.705377 691.0  
SB 0.735045 0.730154 0.740012 1553.0  
SR 0.715527 0.727267 0.704187 907.0  
macro avg 0.713030 0.713783 0.712419 4026.0  
micro avg 0.717322 0.717322 0.717322 4026.0  
weighted avg 0.717283 0.717381 0.717322 4026.0

The result of Model Number:Dataset Number:Featuregroup Number:Rescale of 10 : 1 : 1 :  
0

f1-score precision recall support

AFIB 0.869098 0.869511 0.868809 875.0  
GSVT 0.891605 0.883888 0.899490 691.0  
SB 0.952238 0.945299 0.959288 1553.0  
SR 0.911557 0.929678 0.894176 907.0  
macro avg 0.906124 0.907094 0.905441 4026.0  
micro avg 0.914691 0.914691 0.914691 4026.0  
weighted avg 0.914597 0.914768 0.914691 4026.0

The result of Model Number:Dataset Number:Featuregroup Number:Rescale of 10 : 1 : 1 : 1

|              | f1-score | precision | recall   | support |
|--------------|----------|-----------|----------|---------|
| AFIB         | 0.653933 | 0.639959  | 0.668569 | 875.0   |
| GSVT         | 0.677190 | 0.687545  | 0.667202 | 691.0   |
| SB           | 0.721883 | 0.721978  | 0.721790 | 1553.0  |
| SR           | 0.703285 | 0.710568  | 0.696152 | 907.0   |
| macro avg    | 0.689073 | 0.690013  | 0.688428 | 4026.0  |
| micro avg    | 0.695078 | 0.695078  | 0.695078 | 4026.0  |
| weighted avg | 0.695254 | 0.695672  | 0.695078 | 4026.0  |

The result of Model Number:Dataset Number:Featuregroup Number:Rescale of 10 : 1 : 2 : 0

|              | f1-score | precision | recall   | support |
|--------------|----------|-----------|----------|---------|
| AFIB         | 0.699065 | 0.678925  | 0.767009 | 875.0   |
| GSVT         | 0.770464 | 0.768003  | 0.773040 | 691.0   |
| SB           | 0.650385 | 0.640800  | 0.660314 | 1553.0  |
| SR           | 0.778758 | 0.793958  | 0.764227 | 907.0   |
| macro avg    | 0.724668 | 0.720422  | 0.741148 | 4026.0  |
| micro avg    | 0.726261 | 0.726261  | 0.726261 | 4026.0  |
| weighted avg | 0.710496 | 0.705423  | 0.726261 | 4026.0  |

The result of Model Number:Dataset Number:Featuregroup Number:Rescale of 10 : 1 : 2 : 1

|              | f1-score | precision | recall   | support |
|--------------|----------|-----------|----------|---------|
| AFIB         | 0.719223 | 0.722996  | 0.715533 | 875.0   |
| GSVT         | 0.734262 | 0.732943  | 0.735638 | 691.0   |
| SB           | 0.797283 | 0.791169  | 0.803494 | 1553.0  |
| SR           | 0.769154 | 0.776853  | 0.761611 | 907.0   |
| macro avg    | 0.754981 | 0.755990  | 0.754069 | 4026.0  |
| micro avg    | 0.763295 | 0.763295  | 0.763295 | 4026.0  |
| weighted avg | 0.763164 | 0.763134  | 0.763295 | 4026.0  |

The result of Model Number:Dataset Number:Featuregroup Number:Rescale of 10 : 1 : 3 : 0

|              | f1-score | precision | recall   | support |
|--------------|----------|-----------|----------|---------|
| AFIB         | 0.851319 | 0.851441  | 0.851309 | 875.0   |
| GSVT         | 0.866187 | 0.859007  | 0.873553 | 691.0   |
| SB           | 0.906886 | 0.899041  | 0.914884 | 1553.0  |
| SR           | 0.877002 | 0.896814  | 0.858077 | 907.0   |
| macro avg    | 0.875349 | 0.876576  | 0.874456 | 4026.0  |
| micro avg    | 0.881175 | 0.881175  | 0.881175 | 4026.0  |
| weighted avg | 0.881092 | 0.881323  | 0.881175 | 4026.0  |

The result of Model Number:Dataset Number:Featuregroup Number:Rescale of 10 : 1 : 3 : 1

|      | f1-score | precision | recall   | support |
|------|----------|-----------|----------|---------|
| AFIB | 0.832509 | 0.832242  | 0.832818 | 875.0   |

GSVT 0.844916 0.834055 0.856162 691.0  
SB 0.893701 0.891757 0.895657 1553.0  
SR 0.868974 0.881712 0.856613 907.0  
macro avg 0.860025 0.859942 0.860313 4026.0  
micro avg 0.866425 0.866425 0.866425 4026.0  
weighted avg 0.866458 0.866656 0.866425 4026.0  
The result of Model Number:Dataset Number:Featuregroup Number:Rescale of 10 : 1 : 4 :  
0

f1-score precision recall support

AFIB 0.787152 0.769264 0.805946 875.0  
GSVT 0.814128 0.827331 0.801407 691.0  
SB 0.868586 0.868591 0.868586 1553.0  
SR 0.846355 0.855997 0.836930 907.0  
macro avg 0.829055 0.830296 0.828217 4026.0  
micro avg 0.836310 0.836310 0.836310 4026.0  
weighted avg 0.836532 0.837085 0.836310 4026.0  
The result of Model Number:Dataset Number:Featuregroup Number:Rescale of 10 : 1 : 4 :  
1

f1-score precision recall support

AFIB 0.830545 0.809292 0.853022 875.0  
GSVT 0.785122 0.829620 0.745336 691.0  
SB 0.832504 0.766104 0.911527 1553.0  
SR 0.665030 0.807766 0.565283 907.0  
macro avg 0.778300 0.803195 0.768792 4026.0  
micro avg 0.792284 0.792284 0.792284 4026.0  
weighted avg 0.786216 0.795778 0.792284 4026.0  
The result of Model Number:Dataset Number:Featuregroup Number:Rescale of 10 : 1 : 5 :  
0

f1-score precision recall support

AFIB 0.641516 0.703262 0.589957 204.0  
GSVT 0.746086 0.738419 0.754052 300.0  
SB 0.790908 0.787832 0.794010 892.0  
SR 0.772583 0.761900 0.783584 681.0  
macro avg 0.737773 0.747853 0.730401 2077.0  
micro avg 0.764778 0.764778 0.764778 2077.0  
weighted avg 0.763752 0.763886 0.764778 2077.0  
The result of Model Number:Dataset Number:Featuregroup Number:Rescale of 10 : 1 : 5 :  
1

f1-score precision recall support

AFIB 0.858370 0.834562 0.886277 875.0  
GSVT 0.869575 0.906203 0.841144 691.0  
SB 0.955259 0.954776 0.955754 1553.0  
SR 0.931294 0.937122 0.925544 907.0  
macro avg 0.903624 0.908166 0.902180 4026.0

micro avg 0.914177 0.914177 0.914177 4026.0  
weighted avg 0.914096 0.916335 0.914177 4026.0  
The result of Model Number:Dataset Number:Featuregroup Number:Rescale of 10 : 1 : 6 :  
0

|              | f1-score | precision | recall   | support |
|--------------|----------|-----------|----------|---------|
| AFIB         | 0.625014 | 0.613330  | 0.637218 | 875.0   |
| GSVT         | 0.646907 | 0.657120  | 0.637088 | 691.0   |
| SB           | 0.687958 | 0.686729  | 0.689198 | 1553.0  |
| SR           | 0.670471 | 0.677575  | 0.663520 | 907.0   |
| macro avg    | 0.657588 | 0.658688  | 0.656756 | 4026.0  |
| micro avg    | 0.663172 | 0.663172  | 0.663172 | 4026.0  |
| weighted avg | 0.663293 | 0.663632  | 0.663172 | 4026.0  |

The result of Model Number:Dataset Number:Featuregroup Number:Rescale of 10 : 1 : 6 :  
1

|              | f1-score | precision | recall   | support |
|--------------|----------|-----------|----------|---------|
| AFIB         | 0.811917 | 0.867354  | 0.763487 | 204.0   |
| GSVT         | 0.858277 | 0.840787  | 0.876585 | 300.0   |
| SB           | 0.879565 | 0.871854  | 0.887447 | 892.0   |
| SR           | 0.857869 | 0.860726  | 0.855108 | 681.0   |
| macro avg    | 0.851907 | 0.860180  | 0.845657 | 2077.0  |
| micro avg    | 0.863100 | 0.863100  | 0.863100 | 2077.0  |
| weighted avg | 0.862733 | 0.863276  | 0.863100 | 2077.0  |

The result of Model Number:Dataset Number:Featuregroup Number:Rescale of 10 : 1 : 7 :  
0

|              | f1-score | precision | recall   | support |
|--------------|----------|-----------|----------|---------|
| AFIB         | 0.883426 | 0.929066  | 0.842322 | 204.0   |
| GSVT         | 0.926347 | 0.917293  | 0.935603 | 300.0   |
| SB           | 0.942681 | 0.935097  | 0.950394 | 892.0   |
| SR           | 0.931037 | 0.932170  | 0.929944 | 681.0   |
| macro avg    | 0.920873 | 0.928407  | 0.914566 | 2077.0  |
| micro avg    | 0.930938 | 0.930938  | 0.930938 | 2077.0  |
| weighted avg | 0.930684 | 0.930974  | 0.930938 | 2077.0  |

The result of Model Number:Dataset Number:Featuregroup Number:Rescale of 10 : 1 : 7 :  
1

|              | f1-score | precision | recall   | support |
|--------------|----------|-----------|----------|---------|
| AFIB         | 0.766834 | 0.754557  | 0.862843 | 204.0   |
| GSVT         | 0.897760 | 0.887343  | 0.908752 | 300.0   |
| SB           | 0.927820 | 0.924316  | 0.931356 | 892.0   |
| SR           | 0.727984 | 0.731748  | 0.724383 | 681.0   |
| macro avg    | 0.830099 | 0.824491  | 0.856833 | 2077.0  |
| micro avg    | 0.853500 | 0.853500  | 0.853500 | 2077.0  |
| weighted avg | 0.842145 | 0.839164  | 0.853500 | 2077.0  |

The result of Model Number:Dataset Number:Featuregroup Number:Rescale of 10 : 1 : 8 :  
0

f1-score precision recall support  
AFIB 0.791556 0.832450 0.754727 204.0  
GSVT 0.830014 0.821901 0.838307 300.0  
SB 0.844649 0.837854 0.851560 892.0  
SR 0.834216 0.835232 0.833237 681.0  
macro avg 0.825109 0.831859 0.819458 2077.0  
micro avg 0.834127 0.834127 0.834127 2077.0  
weighted avg 0.833900 0.834159 0.834127 2077.0  
The result of Model Number:Dataset Number:Featuregroup Number:Rescale of 10 : 1 : 8 :  
1

f1-score precision recall support  
AFIB 0.811532 0.830809 0.793203 204.0  
GSVT 0.838189 0.830330 0.846286 300.0  
SB 0.856190 0.855232 0.857150 892.0  
SR 0.847926 0.847074 0.848793 681.0  
macro avg 0.838459 0.840861 0.836358 2077.0  
micro avg 0.846560 0.846560 0.846560 2077.0  
weighted avg 0.846494 0.846561 0.846560 2077.0  
The result of Model Number:Dataset Number:Featuregroup Number:Rescale of 10 : 1 : 9 :  
0

f1-score precision recall support  
AFIB 0.856966 0.903937 0.815205 204.0  
GSVT 0.816014 0.844623 0.789379 300.0  
SB 0.839350 0.806977 0.874443 892.0  
SR 0.747044 0.767312 0.727863 681.0  
macro avg 0.814844 0.830712 0.801723 2077.0  
micro avg 0.808278 0.808278 0.808278 2077.0  
weighted avg 0.807445 0.808933 0.808278 2077.0  
The result of Model Number:Dataset Number:Featuregroup Number:Rescale of 10 : 1 : 9 :  
1

f1-score precision recall support  
AFIB 0.822928 0.840189 0.806384 204.0  
GSVT 0.842018 0.837036 0.847068 300.0  
SB 0.862546 0.860526 0.864576 892.0  
SR 0.855260 0.855014 0.855514 681.0  
macro avg 0.845688 0.848191 0.843386 2077.0  
micro avg 0.853360 0.853360 0.853360 2077.0  
weighted avg 0.853301 0.853328 0.853360 2077.0  
The result of Model Number:Dataset Number:Featuregroup Number:Rescale of 10 : 1 :  
10 : 0

f1-score precision recall support  
AFIB 0.850021 0.855095 0.845030 204.0  
GSVT 0.870907 0.867168 0.874681 300.0  
SB 0.885822 0.884540 0.887112 892.0

SR 0.877723 0.879536 0.875922 681.0  
macro avg 0.871119 0.871585 0.870686 2077.0  
micro avg 0.877514 0.877514 0.877514 2077.0  
weighted avg 0.877496 0.877498 0.877514 2077.0  
The result of Model Number:Dataset Number:Featuregroup Number:Rescale of 10 : 1 :  
10 : 1

f1-score precision recall support  
AFIB 0.732276 0.735642 0.728977 875.0  
GSVT 0.701839 0.706067 0.697684 691.0  
SB 0.752837 0.719279 0.789716 1553.0  
SR 0.643840 0.700904 0.595498 907.0  
macro avg 0.707698 0.715473 0.702969 4026.0  
micro avg 0.716965 0.716965 0.716965 4026.0  
weighted avg 0.715060 0.716428 0.716965 4026.0

The result of Model Number:Dataset Number:Featuregroup Number:Rescale of 11 : 0 : 0 :  
0

f1-score precision recall support  
AFIB 0.693109 0.693233 0.693015 875.0  
GSVT 0.700442 0.702808 0.698136 691.0  
SB 0.735778 0.733241 0.738336 1553.0  
SR 0.721806 0.724241 0.719415 907.0  
macro avg 0.712784 0.713381 0.712225 4026.0  
micro avg 0.717324 0.717324 0.717324 4026.0  
weighted avg 0.717292 0.717295 0.717324 4026.0

The result of Model Number:Dataset Number:Featuregroup Number:Rescale of 11 : 0 : 0 :  
1

f1-score precision recall support  
AFIB 0.634199 0.624650 0.649325 875.0  
GSVT 0.605546 0.603783 0.610711 691.0  
SB 0.646645 0.602570 0.703054 1553.0  
SR 0.479010 0.640294 0.396917 907.0  
macro avg 0.591350 0.617824 0.590002 4026.0  
micro avg 0.606559 0.606559 0.606559 4026.0  
weighted avg 0.599120 0.616076 0.606559 4026.0

The result of Model Number:Dataset Number:Featuregroup Number:Rescale of 11 : 0 : 1 :  
0

f1-score precision recall support  
AFIB 0.742214 0.747513 0.737122 204.0  
GSVT 0.768167 0.767671 0.768677 300.0  
SB 0.783536 0.781798 0.785290 892.0  
SR 0.776532 0.777472 0.775619 681.0  
macro avg 0.767612 0.768614 0.766677 2077.0  
micro avg 0.774989 0.774989 0.774989 2077.0  
weighted avg 0.774961 0.774972 0.774989 2077.0

The result of Model Number:Dataset Number:Featuregroup Number:Rescale of 11 : 0 : 1 :  
1

|              | f1-score | precision | recall   | support |
|--------------|----------|-----------|----------|---------|
| AFIB         | 0.764517 | 0.754756  | 0.774578 | 875.0   |
| GSVT         | 0.777936 | 0.782397  | 0.773546 | 691.0   |
| SB           | 0.832732 | 0.829235  | 0.836267 | 1553.0  |
| SR           | 0.808213 | 0.821295  | 0.795556 | 907.0   |
| macro avg    | 0.795849 | 0.796921  | 0.794987 | 4026.0  |
| micro avg    | 0.802923 | 0.802923  | 0.802923 | 4026.0  |
| weighted avg | 0.802978 | 0.803220  | 0.802923 | 4026.0  |

The result of Model Number:Dataset Number:Featuregroup Number:Rescale of 11 : 0 : 2 :  
0

|              | f1-score | precision | recall   | support |
|--------------|----------|-----------|----------|---------|
| AFIB         | 0.777129 | 0.771745  | 0.782745 | 875.0   |
| GSVT         | 0.789118 | 0.792321  | 0.786070 | 691.0   |
| SB           | 0.856195 | 0.847292  | 0.865291 | 1553.0  |
| SR           | 0.812965 | 0.831881  | 0.794964 | 907.0   |
| macro avg    | 0.808852 | 0.810810  | 0.807267 | 4026.0  |
| micro avg    | 0.817910 | 0.817910  | 0.817910 | 4026.0  |
| weighted avg | 0.817759 | 0.817966  | 0.817910 | 4026.0  |

The result of Model Number:Dataset Number:Featuregroup Number:Rescale of 11 : 0 : 2 :  
1

|              | f1-score | precision | recall   | support |
|--------------|----------|-----------|----------|---------|
| AFIB         | 0.768360 | 0.810475  | 0.730917 | 204.0   |
| GSVT         | 0.731642 | 0.757294  | 0.707762 | 300.0   |
| SB           | 0.752566 | 0.723540  | 0.784030 | 892.0   |
| SR           | 0.669804 | 0.687976  | 0.652606 | 681.0   |
| macro avg    | 0.730593 | 0.744821  | 0.718829 | 2077.0  |
| micro avg    | 0.724706 | 0.724706  | 0.724706 | 2077.0  |
| weighted avg | 0.723959 | 0.725293  | 0.724706 | 2077.0  |

The result of Model Number:Dataset Number:Featuregroup Number:Rescale of 11 : 0 : 3 :  
0

|              | f1-score | precision | recall   | support |
|--------------|----------|-----------|----------|---------|
| AFIB         | 0.868831 | 0.895590  | 0.843798 | 204.0   |
| GSVT         | 0.890996 | 0.880089  | 0.902274 | 300.0   |
| SB           | 0.915197 | 0.909759  | 0.920731 | 892.0   |
| SR           | 0.899770 | 0.904208  | 0.895411 | 681.0   |
| macro avg    | 0.893698 | 0.897411  | 0.890553 | 2077.0  |
| micro avg    | 0.902207 | 0.902207  | 0.902207 | 2077.0  |
| weighted avg | 0.902089 | 0.902262  | 0.902207 | 2077.0  |

The result of Model Number:Dataset Number:Featuregroup Number:Rescale of 11 : 0 : 3 :  
1

|      | f1-score | precision | recall   | support |
|------|----------|-----------|----------|---------|
| AFIB | 0.854662 | 0.843670  | 0.866004 | 875.0   |



GSVT 0.872059 0.879279 0.864993 691.0  
SB 0.932407 0.928257 0.936605 1553.0  
SR 0.905873 0.919271 0.892881 907.0  
macro avg 0.891250 0.892619 0.890121 4026.0  
micro avg 0.899119 0.899119 0.899119 4026.0  
weighted avg 0.899174 0.899442 0.899119 4026.0  
The result of Model Number:Dataset Number:Featuregroup Number:Rescale of 11 : 0 : 4 :  
0

f1-score precision recall support  
AFIB 0.747019 0.725497 0.819623 875.0  
GSVT 0.823315 0.820685 0.826068 691.0  
SB 0.694999 0.684757 0.705609 1553.0  
SR 0.832178 0.848421 0.816650 907.0  
macro avg 0.774378 0.769840 0.791987 4026.0  
micro avg 0.776079 0.776079 0.776079 4026.0  
weighted avg 0.759233 0.753812 0.776079 4026.0  
The result of Model Number:Dataset Number:Featuregroup Number:Rescale of 11 : 0 : 4 :  
1

f1-score precision recall support  
AFIB 0.648304 0.642373 0.654374 875.0  
GSVT 0.656611 0.662404 0.651016 691.0  
SB 0.697956 0.694277 0.701685 1553.0  
SR 0.682179 0.690400 0.674213 907.0  
macro avg 0.671263 0.672363 0.670322 4026.0  
micro avg 0.676517 0.676517 0.676517 4026.0  
weighted avg 0.676514 0.676652 0.676517 4026.0  
The result of Model Number:Dataset Number:Featuregroup Number:Rescale of 11 : 0 : 5 :  
0

f1-score precision recall support  
AFIB 0.654681 0.639423 0.670792 875.0  
GSVT 0.628471 0.635379 0.621754 691.0  
SB 0.661365 0.618658 0.710421 1553.0  
SR 0.529320 0.635611 0.453768 907.0  
macro avg 0.618459 0.632268 0.614184 4026.0  
micro avg 0.628769 0.628769 0.628769 4026.0  
weighted avg 0.624519 0.629860 0.628769 4026.0  
The result of Model Number:Dataset Number:Featuregroup Number:Rescale of 11 : 0 : 5 :  
1

f1-score precision recall support  
AFIB 0.647901 0.653267 0.729772 204.0  
GSVT 0.702605 0.672533 0.792703 300.0  
SB 0.641504 0.639275 0.643751 892.0  
SR 0.635126 0.635246 0.635010 681.0  
macro avg 0.656784 0.650080 0.700309 2077.0

micro avg 0.670849 0.670849 0.670849 2077.0  
weighted avg 0.648867 0.644132 0.670849 2077.0  
The result of Model Number:Dataset Number:Featuregroup Number:Rescale of 11 : 0 : 6 :  
0

|              | f1-score | precision | recall   | support |
|--------------|----------|-----------|----------|---------|
| AFIB         | 0.789091 | 0.791094  | 0.787127 | 875.0   |
| GSVT         | 0.803016 | 0.794317  | 0.811941 | 691.0   |
| SB           | 0.846335 | 0.836761  | 0.856143 | 1553.0  |
| SR           | 0.807639 | 0.829750  | 0.786708 | 907.0   |
| macro avg    | 0.811520 | 0.812980  | 0.810480 | 4026.0  |
| micro avg    | 0.817914 | 0.817914  | 0.817914 | 4026.0  |
| weighted avg | 0.817741 | 0.817971  | 0.817914 | 4026.0  |

The result of Model Number:Dataset Number:Featuregroup Number:Rescale of 11 : 0 : 6 :  
1

|              | f1-score | precision | recall   | support |
|--------------|----------|-----------|----------|---------|
| AFIB         | 0.740232 | 0.771539  | 0.711613 | 204.0   |
| GSVT         | 0.681700 | 0.682894  | 0.690737 | 300.0   |
| SB           | 0.733913 | 0.698950  | 0.773270 | 892.0   |
| SR           | 0.648815 | 0.701072  | 0.604982 | 681.0   |
| macro avg    | 0.701165 | 0.713614  | 0.695150 | 2077.0  |
| micro avg    | 0.700115 | 0.700115  | 0.700115 | 2077.0  |
| weighted avg | 0.699090 | 0.704456  | 0.700115 | 2077.0  |

The result of Model Number:Dataset Number:Featuregroup Number:Rescale of 11 : 0 : 7 :  
0

|              | f1-score | precision | recall   | support |
|--------------|----------|-----------|----------|---------|
| AFIB         | 0.692828 | 0.688684  | 0.697117 | 875.0   |
| GSVT         | 0.698502 | 0.702273  | 0.694872 | 691.0   |
| SB           | 0.740307 | 0.738143  | 0.742495 | 1553.0  |
| SR           | 0.723579 | 0.728777  | 0.718469 | 907.0   |
| macro avg    | 0.713804 | 0.714469  | 0.713238 | 4026.0  |
| micro avg    | 0.719046 | 0.719046  | 0.719046 | 4026.0  |
| weighted avg | 0.719045 | 0.719127  | 0.719046 | 4026.0  |

The result of Model Number:Dataset Number:Featuregroup Number:Rescale of 11 : 0 : 7 :  
1

|              | f1-score | precision | recall   | support |
|--------------|----------|-----------|----------|---------|
| AFIB         | 0.891026 | 0.914352  | 0.869266 | 204.0   |
| GSVT         | 0.838394 | 0.862760  | 0.815822 | 300.0   |
| SB           | 0.884684 | 0.853537  | 0.918208 | 892.0   |
| SR           | 0.801859 | 0.827972  | 0.777503 | 681.0   |
| macro avg    | 0.853991 | 0.864655  | 0.845200 | 2077.0  |
| micro avg    | 0.852479 | 0.852479  | 0.852479 | 2077.0  |
| weighted avg | 0.851464 | 0.852460  | 0.852479 | 2077.0  |

The result of Model Number:Dataset Number:Featuregroup Number:Rescale of 11 : 0 : 8 :  
0

f1-score precision recall support  
AFIB 0.836237 0.842988 0.829665 204.0  
GSVT 0.855425 0.851231 0.859691 300.0  
SB 0.872120 0.871153 0.873097 892.0  
SR 0.865608 0.866759 0.864466 681.0  
macro avg 0.857348 0.858033 0.856730 2077.0  
micro avg 0.864065 0.864065 0.864065 2077.0  
weighted avg 0.864049 0.864069 0.864065 2077.0  
The result of Model Number:Dataset Number:Featuregroup Number:Rescale of 11 : 0 : 8 :  
1

f1-score precision recall support  
AFIB 0.761729 0.776619 0.747533 204.0  
GSVT 0.782660 0.777021 0.788408 300.0  
SB 0.796667 0.793567 0.799793 892.0  
SR 0.787959 0.790189 0.785759 681.0  
macro avg 0.782254 0.784349 0.780373 2077.0  
micro avg 0.788414 0.788414 0.788414 2077.0  
weighted avg 0.788357 0.788405 0.788414 2077.0  
The result of Model Number:Dataset Number:Featuregroup Number:Rescale of 11 : 0 : 9 :  
0

f1-score precision recall support  
AFIB 0.658271 0.656247 0.660350 875.0  
GSVT 0.641491 0.644637 0.638478 691.0  
SB 0.674387 0.646401 0.704912 1553.0  
SR 0.580366 0.633212 0.535707 907.0  
macro avg 0.638629 0.645124 0.634862 4026.0  
micro avg 0.645705 0.645705 0.645705 4026.0  
weighted avg 0.644057 0.645267 0.645705 4026.0  
The result of Model Number:Dataset Number:Featuregroup Number:Rescale of 11 : 0 : 9 :  
1

f1-score precision recall support  
AFIB 0.850138 0.886958 0.816495 204.0  
GSVT 0.794732 0.802148 0.787849 300.0  
SB 0.823797 0.783295 0.868774 892.0  
SR 0.734226 0.780562 0.693321 681.0  
macro avg 0.800723 0.813241 0.791610 2077.0  
micro avg 0.794423 0.794423 0.794423 2077.0  
weighted avg 0.792818 0.795304 0.794423 2077.0  
The result of Model Number:Dataset Number:Featuregroup Number:Rescale of 11 : 0 :  
10 : 0

f1-score precision recall support  
AFIB 0.709522 0.703030 0.716165 875.0  
GSVT 0.718613 0.724953 0.712490 691.0  
SB 0.763862 0.759835 0.767943 1553.0

SR 0.746595 0.755592 0.737877 907.0  
macro avg 0.734648 0.735853 0.733619 4026.0  
micro avg 0.740399 0.740399 0.740399 4026.0  
weighted avg 0.740396 0.740547 0.740399 4026.0  
The result of Model Number:Dataset Number:Featuregroup Number:Rescale of 11 : 0 :  
10 : 1

f1-score precision recall support  
AFIB 0.709307 0.755523 0.668734 204.0  
GSVT 0.740381 0.722182 0.759621 300.0  
SB 0.762094 0.752304 0.772169 892.0  
SR 0.742300 0.751163 0.733692 681.0  
macro avg 0.738521 0.745293 0.733554 2077.0  
micro avg 0.747582 0.747582 0.747582 2077.0  
weighted avg 0.747283 0.747896 0.747582 2077.0  
The result of Model Number:Dataset Number:Featuregroup Number:Rescale of 11 : 1 : 0 :  
0

f1-score precision recall support  
AFIB 0.857339 0.893599 0.824192 204.0  
GSVT 0.789547 0.790930 0.800014 300.0  
SB 0.850021 0.809526 0.895604 892.0  
SR 0.751460 0.811985 0.700692 681.0  
macro avg 0.812092 0.826510 0.805126 2077.0  
micro avg 0.810876 0.810876 0.810876 2077.0  
weighted avg 0.809689 0.815904 0.810876 2077.0  
The result of Model Number:Dataset Number:Featuregroup Number:Rescale of 11 : 1 : 0 :  
1

f1-score precision recall support  
AFIB 0.860118 0.887688 0.834466 204.0  
GSVT 0.885850 0.870610 0.901765 300.0  
SB 0.901174 0.892266 0.910265 892.0  
SR 0.877079 0.888054 0.866390 681.0  
macro avg 0.881055 0.884654 0.878221 2077.0  
micro avg 0.887207 0.887207 0.887207 2077.0  
weighted avg 0.887028 0.887307 0.887207 2077.0  
The result of Model Number:Dataset Number:Featuregroup Number:Rescale of 11 : 1 : 1 :  
0

f1-score precision recall support  
AFIB 0.711132 0.742738 0.682205 204.0  
GSVT 0.740766 0.734951 0.746691 300.0  
SB 0.752082 0.746280 0.757982 892.0  
SR 0.743761 0.744990 0.742564 681.0  
macro avg 0.736936 0.742240 0.732360 2077.0  
micro avg 0.743853 0.743853 0.743853 2077.0  
weighted avg 0.743697 0.743873 0.743853 2077.0

The result of Model Number:Dataset Number:Featuregroup Number:Rescale of 11 : 1 : 1 : 1

|              | f1-score | precision | recall   | support |
|--------------|----------|-----------|----------|---------|
| AFIB         | 0.746171 | 0.766339  | 0.727193 | 204.0   |
| GSVT         | 0.752321 | 0.741247  | 0.763835 | 300.0   |
| SB           | 0.766894 | 0.758736  | 0.775233 | 892.0   |
| SR           | 0.752670 | 0.763012  | 0.742617 | 681.0   |
| macro avg    | 0.754514 | 0.757333  | 0.752219 | 2077.0  |
| micro avg    | 0.758174 | 0.758174  | 0.758174 | 2077.0  |
| weighted avg | 0.758090 | 0.758359  | 0.758174 | 2077.0  |

The result of Model Number:Dataset Number:Featuregroup Number:Rescale of 11 : 1 : 2 : 0

|              | f1-score | precision | recall   | support |
|--------------|----------|-----------|----------|---------|
| AFIB         | 0.759798 | 0.749831  | 0.770067 | 875.0   |
| GSVT         | 0.771430 | 0.780005  | 0.763055 | 691.0   |
| SB           | 0.818201 | 0.816270  | 0.820146 | 1553.0  |
| SR           | 0.797716 | 0.804895  | 0.790674 | 907.0   |
| macro avg    | 0.786786 | 0.787750  | 0.785986 | 4026.0  |
| micro avg    | 0.792824 | 0.792824  | 0.792824 | 4026.0  |
| weighted avg | 0.792865 | 0.793043  | 0.792824 | 4026.0  |

The result of Model Number:Dataset Number:Featuregroup Number:Rescale of 11 : 1 : 2 : 1

|              | f1-score | precision | recall   | support |
|--------------|----------|-----------|----------|---------|
| AFIB         | 0.784848 | 0.808650  | 0.762440 | 875.0   |
| GSVT         | 0.837836 | 0.832026  | 0.843773 | 691.0   |
| SB           | 0.916695 | 0.913188  | 0.920235 | 1553.0  |
| SR           | 0.866973 | 0.853960  | 0.880438 | 907.0   |
| macro avg    | 0.851588 | 0.851956  | 0.851722 | 4026.0  |
| micro avg    | 0.863851 | 0.863851  | 0.863851 | 4026.0  |
| weighted avg | 0.863303 | 0.863195  | 0.863851 | 4026.0  |

The result of Model Number:Dataset Number:Featuregroup Number:Rescale of 11 : 1 : 3 : 0

|              | f1-score | precision | recall   | support |
|--------------|----------|-----------|----------|---------|
| AFIB         | 0.650083 | 0.664784  | 0.636038 | 875.0   |
| GSVT         | 0.689236 | 0.692169  | 0.686368 | 691.0   |
| SB           | 0.748367 | 0.744840  | 0.751932 | 1553.0  |
| SR           | 0.709068 | 0.698191  | 0.720318 | 907.0   |
| macro avg    | 0.699188 | 0.699996  | 0.698664 | 4026.0  |
| micro avg    | 0.708369 | 0.708369  | 0.708369 | 4026.0  |
| weighted avg | 0.708004 | 0.707891  | 0.708369 | 4026.0  |

The result of Model Number:Dataset Number:Featuregroup Number:Rescale of 11 : 1 : 3 : 1

|      | f1-score | precision | recall   | support |
|------|----------|-----------|----------|---------|
| AFIB | 0.687795 | 0.693079  | 0.682748 | 204.0   |

GSVT 0.712016 0.711334 0.712723 300.0  
SB 0.726583 0.724891 0.728291 892.0  
SR 0.719897 0.720867 0.718945 681.0  
macro avg 0.711573 0.712543 0.710677 2077.0  
micro avg 0.718505 0.718505 0.718505 2077.0  
weighted avg 0.718477 0.718489 0.718505 2077.0  
The result of Model Number:Dataset Number:Featuregroup Number:Rescale of 11 : 1 : 4 :  
0

f1-score precision recall support  
AFIB 0.688599 0.689833 0.687392 875.0  
GSVT 0.659380 0.662844 0.655971 691.0  
SB 0.697464 0.659097 0.740580 1553.0  
SR 0.579247 0.651985 0.521161 907.0  
macro avg 0.656173 0.665940 0.651276 4026.0  
micro avg 0.665067 0.665067 0.665067 4026.0  
weighted avg 0.662368 0.664818 0.665067 4026.0  
The result of Model Number:Dataset Number:Featuregroup Number:Rescale of 11 : 1 : 4 :  
1

f1-score precision recall support  
AFIB 0.772848 0.775668 0.770099 875.0  
GSVT 0.786205 0.775968 0.796784 691.0  
SB 0.828740 0.819612 0.838079 1553.0  
SR 0.785408 0.807104 0.764890 907.0  
macro avg 0.793300 0.794588 0.792463 4026.0  
micro avg 0.799728 0.799728 0.799728 4026.0  
weighted avg 0.799530 0.799753 0.799728 4026.0  
The result of Model Number:Dataset Number:Featuregroup Number:Rescale of 11 : 1 : 5 :  
0

f1-score precision recall support  
AFIB 0.905916 0.937597 0.876724 204.0  
GSVT 0.944174 0.938419 0.950130 300.0  
SB 0.963562 0.959603 0.967557 892.0  
SR 0.954654 0.953262 0.956057 681.0  
macro avg 0.942077 0.947220 0.937617 2077.0  
micro avg 0.952348 0.952348 0.952348 2077.0  
weighted avg 0.952179 0.952303 0.952348 2077.0  
The result of Model Number:Dataset Number:Featuregroup Number:Rescale of 11 : 1 : 5 :  
1

f1-score precision recall support  
AFIB 0.796657 0.802345 0.791191 204.0  
GSVT 0.824513 0.823982 0.825062 300.0  
SB 0.841010 0.839144 0.842893 892.0  
SR 0.833493 0.834501 0.832512 681.0  
macro avg 0.823918 0.824993 0.822915 2077.0

micro avg 0.831836 0.831836 0.831836 2077.0  
weighted avg 0.831806 0.831817 0.831836 2077.0  
The result of Model Number:Dataset Number:Featuregroup Number:Rescale of 11 : 1 : 6 :  
0

|              | f1-score | precision | recall   | support |
|--------------|----------|-----------|----------|---------|
| AFIB         | 0.675217 | 0.676599  | 0.673914 | 204.0   |
| GSVT         | 0.690068 | 0.687386  | 0.692820 | 300.0   |
| SB           | 0.705388 | 0.704446  | 0.706335 | 892.0   |
| SR           | 0.700206 | 0.702276  | 0.698151 | 681.0   |
| macro avg    | 0.692720 | 0.692677  | 0.692805 | 2077.0  |
| micro avg    | 0.698515 | 0.698515  | 0.698515 | 2077.0  |
| weighted avg | 0.698513 | 0.698536  | 0.698515 | 2077.0  |

The result of Model Number:Dataset Number:Featuregroup Number:Rescale of 11 : 1 : 6 :  
1

|              | f1-score | precision | recall   | support |
|--------------|----------|-----------|----------|---------|
| AFIB         | 0.599189 | 0.622473  | 0.577628 | 875.0   |
| GSVT         | 0.644147 | 0.639391  | 0.649061 | 691.0   |
| SB           | 0.707869 | 0.704222  | 0.711559 | 1553.0  |
| SR           | 0.666169 | 0.653466  | 0.679448 | 907.0   |
| macro avg    | 0.654344 | 0.654888  | 0.654424 | 4026.0  |
| micro avg    | 0.664490 | 0.664490  | 0.664490 | 4026.0  |
| weighted avg | 0.663917 | 0.663893  | 0.664490 | 4026.0  |

The result of Model Number:Dataset Number:Featuregroup Number:Rescale of 11 : 1 : 7 :  
0

|              | f1-score | precision | recall   | support |
|--------------|----------|-----------|----------|---------|
| AFIB         | 0.637271 | 0.637441  | 0.637212 | 875.0   |
| GSVT         | 0.648368 | 0.645974  | 0.650861 | 691.0   |
| SB           | 0.693627 | 0.691943  | 0.695322 | 1553.0  |
| SR           | 0.677085 | 0.681944  | 0.672313 | 907.0   |
| macro avg    | 0.664088 | 0.664326  | 0.663927 | 4026.0  |
| micro avg    | 0.669878 | 0.669878  | 0.669878 | 4026.0  |
| weighted avg | 0.669884 | 0.669955  | 0.669878 | 4026.0  |

The result of Model Number:Dataset Number:Featuregroup Number:Rescale of 11 : 1 : 7 :  
1

|              | f1-score | precision | recall   | support |
|--------------|----------|-----------|----------|---------|
| AFIB         | 0.697985 | 0.689600  | 0.706603 | 875.0   |
| GSVT         | 0.711410 | 0.717170  | 0.705746 | 691.0   |
| SB           | 0.758308 | 0.755405  | 0.761236 | 1553.0  |
| SR           | 0.740528 | 0.749997  | 0.731305 | 907.0   |
| macro avg    | 0.727058 | 0.728043  | 0.726222 | 4026.0  |
| micro avg    | 0.733095 | 0.733095  | 0.733095 | 4026.0  |
| weighted avg | 0.733143 | 0.733322  | 0.733095 | 4026.0  |

The result of Model Number:Dataset Number:Featuregroup Number:Rescale of 11 : 1 : 8 :  
0

|              | f1-score | precision | recall   | support |
|--------------|----------|-----------|----------|---------|
| AFIB         | 0.883779 | 0.889558  | 0.878129 | 204.0   |
| GSVT         | 0.905922 | 0.903835  | 0.908029 | 300.0   |
| SB           | 0.922093 | 0.920762  | 0.923434 | 892.0   |
| SR           | 0.914825 | 0.915781  | 0.913888 | 681.0   |
| macro avg    | 0.906655 | 0.907484  | 0.905870 | 2077.0  |
| micro avg    | 0.913629 | 0.913629  | 0.913629 | 2077.0  |
| weighted avg | 0.913611 | 0.913619  | 0.913629 | 2077.0  |

The result of Model Number:Dataset Number:Featuregroup Number:Rescale of 11 : 1 : 8 : 1

|              | f1-score | precision | recall   | support |
|--------------|----------|-----------|----------|---------|
| AFIB         | 0.886002 | 0.878167  | 0.894016 | 875.0   |
| GSVT         | 0.805530 | 0.780095  | 0.896168 | 691.0   |
| SB           | 0.726229 | 0.697280  | 0.771500 | 1553.0  |
| SR           | 0.748484 | 0.756229  | 0.740945 | 907.0   |
| macro avg    | 0.791561 | 0.777943  | 0.825657 | 4026.0  |
| micro avg    | 0.812641 | 0.812641  | 0.812641 | 4026.0  |
| weighted avg | 0.779578 | 0.764088  | 0.812641 | 4026.0  |

The result of Model Number:Dataset Number:Featuregroup Number:Rescale of 11 : 1 : 9 : 0

|              | f1-score | precision | recall   | support |
|--------------|----------|-----------|----------|---------|
| AFIB         | 0.927439 | 0.945960  | 0.909772 | 204.0   |
| GSVT         | 0.937855 | 0.926136  | 0.950015 | 300.0   |
| SB           | 0.955760 | 0.946621  | 0.965078 | 892.0   |
| SR           | 0.938403 | 0.950713  | 0.926433 | 681.0   |
| macro avg    | 0.939864 | 0.942358  | 0.937824 | 2077.0  |
| micro avg    | 0.944800 | 0.944800  | 0.944800 | 2077.0  |
| weighted avg | 0.944701 | 0.944939  | 0.944800 | 2077.0  |

The result of Model Number:Dataset Number:Featuregroup Number:Rescale of 11 : 1 : 9 : 1

|              | f1-score | precision | recall   | support |
|--------------|----------|-----------|----------|---------|
| AFIB         | 0.652673 | 0.655338  | 0.650050 | 875.0   |
| GSVT         | 0.607764 | 0.634587  | 0.583217 | 691.0   |
| SB           | 0.652703 | 0.591264  | 0.728400 | 1553.0  |
| SR           | 0.492356 | 0.612784  | 0.411654 | 907.0   |
| macro avg    | 0.601374 | 0.623493  | 0.593330 | 4026.0  |
| micro avg    | 0.615095 | 0.615095  | 0.615095 | 4026.0  |
| weighted avg | 0.608860 | 0.617474  | 0.615095 | 4026.0  |

The result of Model Number:Dataset Number:Featuregroup Number:Rescale of 11 : 1 : 10 : 0

|      | f1-score | precision | recall   | support |
|------|----------|-----------|----------|---------|
| AFIB | 0.877445 | 0.878826  | 0.876181 | 204.0   |
| GSVT | 0.898665 | 0.897263  | 0.900147 | 300.0   |
| SB   | 0.917204 | 0.916085  | 0.918333 | 892.0   |



SR 0.910781 0.912529 0.909043 681.0  
macro avg 0.901024 0.901176 0.900926 2077.0  
micro avg 0.908520 0.908520 0.908520 2077.0  
weighted avg 0.908515 0.908541 0.908520 2077.0  
The result of Model Number:Dataset Number:Featuregroup Number:Rescale of 11 : 1 :  
10 : 1

f1-score precision recall support  
AFIB 0.830207 0.813440 0.847745 875.0  
GSVT 0.857732 0.871369 0.844699 691.0  
SB 0.912639 0.912588 0.912697 1553.0  
SR 0.890512 0.898626 0.882557 907.0  
macro avg 0.872772 0.874006 0.871925 4026.0  
micro avg 0.880120 0.880120 0.880120 4026.0  
weighted avg 0.880314 0.880820 0.880120 4026.0

The result of Model Number:Dataset Number:Featuregroup Number:Rescale of 12 : 0 : 0 :  
0

f1-score precision recall support  
AFIB 0.846612 0.850808 0.842548 875.0  
GSVT 0.855042 0.856274 0.853943 691.0  
SB 0.900047 0.895871 0.904272 1553.0  
SR 0.883478 0.885690 0.881325 907.0  
macro avg 0.871295 0.872161 0.870522 4026.0  
micro avg 0.877049 0.877049 0.877049 4026.0  
weighted avg 0.876976 0.876987 0.877049 4026.0

The result of Model Number:Dataset Number:Featuregroup Number:Rescale of 12 : 0 : 0 :  
1

f1-score precision recall support  
AFIB 0.626847 0.620701 0.670224 204.0  
GSVT 0.562064 0.555815 0.568596 300.0  
SB 0.722288 0.717028 0.727630 892.0  
SR 0.710174 0.715093 0.705381 681.0  
macro avg 0.655343 0.652159 0.667958 2077.0  
micro avg 0.691726 0.691726 0.691726 2077.0  
weighted avg 0.685799 0.683647 0.691726 2077.0

The result of Model Number:Dataset Number:Featuregroup Number:Rescale of 12 : 0 : 1 :  
0

f1-score precision recall support  
AFIB 0.899943 0.899494 0.900432 875.0  
GSVT 0.911138 0.917234 0.905195 691.0  
SB 0.965931 0.963711 0.968166 1553.0  
SR 0.937954 0.937731 0.938338 907.0  
macro avg 0.928741 0.929542 0.928033 4026.0  
micro avg 0.935917 0.935917 0.935917 4026.0  
weighted avg 0.935882 0.935924 0.935917 4026.0

The result of Model Number:Dataset Number:Featuregroup Number:Rescale of 12 : 0 : 1 : 1

|              | f1-score | precision | recall   | support |
|--------------|----------|-----------|----------|---------|
| AFIB         | 0.820098 | 0.816763  | 0.823481 | 875.0   |
| GSVT         | 0.832086 | 0.837116  | 0.827148 | 691.0   |
| SB           | 0.877591 | 0.876522  | 0.878665 | 1553.0  |
| SR           | 0.859283 | 0.860644  | 0.857951 | 907.0   |
| macro avg    | 0.847264 | 0.847761  | 0.846811 | 4026.0  |
| micro avg    | 0.853163 | 0.853163  | 0.853163 | 4026.0  |
| weighted avg | 0.853161 | 0.853194  | 0.853163 | 4026.0  |

The result of Model Number:Dataset Number:Featuregroup Number:Rescale of 12 : 0 : 2 : 0

|              | f1-score | precision | recall   | support |
|--------------|----------|-----------|----------|---------|
| AFIB         | 0.703105 | 0.709906  | 0.696560 | 204.0   |
| GSVT         | 0.727984 | 0.726549  | 0.729437 | 300.0   |
| SB           | 0.743201 | 0.741884  | 0.744531 | 892.0   |
| SR           | 0.736349 | 0.736705  | 0.736024 | 681.0   |
| macro avg    | 0.727660 | 0.728761  | 0.726638 | 2077.0  |
| micro avg    | 0.734850 | 0.734850  | 0.734850 | 2077.0  |
| weighted avg | 0.734818 | 0.734830  | 0.734850 | 2077.0  |

The result of Model Number:Dataset Number:Featuregroup Number:Rescale of 12 : 0 : 2 : 1

|              | f1-score | precision | recall   | support |
|--------------|----------|-----------|----------|---------|
| AFIB         | 0.905007 | 0.912556  | 0.897894 | 204.0   |
| GSVT         | 0.928915 | 0.924637  | 0.933252 | 300.0   |
| SB           | 0.942923 | 0.939574  | 0.946303 | 892.0   |
| SR           | 0.934215 | 0.938399  | 0.930116 | 681.0   |
| macro avg    | 0.927765 | 0.928791  | 0.926891 | 2077.0  |
| micro avg    | 0.934356 | 0.934356  | 0.934356 | 2077.0  |
| weighted avg | 0.934321 | 0.934377  | 0.934356 | 2077.0  |

The result of Model Number:Dataset Number:Featuregroup Number:Rescale of 12 : 0 : 3 : 0

|              | f1-score | precision | recall   | support |
|--------------|----------|-----------|----------|---------|
| AFIB         | 0.862381 | 0.863151  | 0.861702 | 875.0   |
| GSVT         | 0.878178 | 0.880482  | 0.876034 | 691.0   |
| SB           | 0.932198 | 0.925991  | 0.938497 | 1553.0  |
| SR           | 0.914035 | 0.922380  | 0.905872 | 907.0   |
| macro avg    | 0.896698 | 0.898001  | 0.895526 | 4026.0  |
| micro avg    | 0.903736 | 0.903736  | 0.903736 | 4026.0  |
| weighted avg | 0.903660 | 0.903709  | 0.903736 | 4026.0  |

The result of Model Number:Dataset Number:Featuregroup Number:Rescale of 12 : 0 : 3 : 1

|      | f1-score | precision | recall   | support |
|------|----------|-----------|----------|---------|
| AFIB | 0.794076 | 0.793868  | 0.794361 | 875.0   |

GSVT 0.810664 0.807599 0.813840 691.0  
SB 0.863074 0.859178 0.867020 1553.0  
SR 0.833987 0.843516 0.824704 907.0  
macro avg 0.825451 0.826040 0.824981 4026.0  
micro avg 0.832567 0.832567 0.832567 4026.0  
weighted avg 0.832530 0.832602 0.832567 4026.0  
The result of Model Number:Dataset Number:Featuregroup Number:Rescale of 12 : 0 : 4 :  
0

f1-score precision recall support

AFIB 0.935091 0.947581 0.923189 204.0  
GSVT 0.951610 0.945813 0.957624 300.0  
SB 0.974549 0.973685 0.975421 892.0  
SR 0.967348 0.967495 0.967207 681.0  
macro avg 0.957149 0.958643 0.955860 2077.0  
micro avg 0.965027 0.965027 0.965027 2077.0  
weighted avg 0.964999 0.965066 0.965027 2077.0

The result of Model Number:Dataset Number:Featuregroup Number:Rescale of 12 : 0 : 4 :  
1

f1-score precision recall support

AFIB 0.722243 0.720418 0.724189 875.0  
GSVT 0.736333 0.732285 0.740466 691.0  
SB 0.770999 0.766351 0.775715 1553.0  
SR 0.748267 0.761772 0.735246 907.0  
macro avg 0.744461 0.745207 0.743904 4026.0  
micro avg 0.749350 0.749350 0.749350 4026.0  
weighted avg 0.749332 0.749490 0.749350 4026.0

The result of Model Number:Dataset Number:Featuregroup Number:Rescale of 12 : 0 : 5 :  
0

f1-score precision recall support

AFIB 0.718676 0.723705 0.713741 204.0  
GSVT 0.735396 0.731771 0.739069 300.0  
SB 0.750013 0.748764 0.751274 892.0  
SR 0.742548 0.744311 0.740802 681.0  
macro avg 0.736658 0.737138 0.736222 2077.0  
micro avg 0.742391 0.742391 0.742391 2077.0  
weighted avg 0.742376 0.742388 0.742391 2077.0

The result of Model Number:Dataset Number:Featuregroup Number:Rescale of 12 : 0 : 5 :  
1

f1-score precision recall support

AFIB 0.666830 0.671591 0.662255 204.0  
GSVT 0.690147 0.689702 0.690606 300.0  
SB 0.703956 0.702394 0.705532 892.0  
SR 0.697663 0.698507 0.696842 681.0  
macro avg 0.689649 0.690549 0.688809 2077.0

micro avg 0.696276 0.696276 0.696276 2077.0  
weighted avg 0.696251 0.696261 0.696276 2077.0  
The result of Model Number:Dataset Number:Featuregroup Number:Rescale of 12 : 0 : 6 :  
0

|              | f1-score | precision | recall   | support |
|--------------|----------|-----------|----------|---------|
| AFIB         | 0.660214 | 0.665286  | 0.655370 | 204.0   |
| GSVT         | 0.683464 | 0.682809  | 0.684143 | 300.0   |
| SB           | 0.697447 | 0.695822  | 0.699086 | 892.0   |
| SR           | 0.691028 | 0.691960  | 0.690115 | 681.0   |
| macro avg    | 0.683038 | 0.683969  | 0.682178 | 2077.0  |
| micro avg    | 0.689692 | 0.689692  | 0.689692 | 2077.0  |
| weighted avg | 0.689666 | 0.689677  | 0.689692 | 2077.0  |

The result of Model Number:Dataset Number:Featuregroup Number:Rescale of 12 : 0 : 6 :  
1

|              | f1-score | precision | recall   | support |
|--------------|----------|-----------|----------|---------|
| AFIB         | 0.663147 | 0.691194  | 0.637508 | 204.0   |
| GSVT         | 0.610711 | 0.611780  | 0.618806 | 300.0   |
| SB           | 0.657486 | 0.626164  | 0.692745 | 892.0   |
| SR           | 0.581250 | 0.628065  | 0.541981 | 681.0   |
| macro avg    | 0.628148 | 0.639301  | 0.622760 | 2077.0  |
| micro avg    | 0.627208 | 0.627208  | 0.627208 | 2077.0  |
| weighted avg | 0.626290 | 0.631097  | 0.627208 | 2077.0  |

The result of Model Number:Dataset Number:Featuregroup Number:Rescale of 12 : 0 : 7 :  
0

|              | f1-score | precision | recall   | support |
|--------------|----------|-----------|----------|---------|
| AFIB         | 0.667287 | 0.666954  | 0.667650 | 875.0   |
| GSVT         | 0.675587 | 0.680107  | 0.671181 | 691.0   |
| SB           | 0.716215 | 0.714569  | 0.717873 | 1553.0  |
| SR           | 0.695471 | 0.695306  | 0.695756 | 907.0   |
| macro avg    | 0.688640 | 0.689234  | 0.688115 | 4026.0  |
| micro avg    | 0.693961 | 0.693961  | 0.693961 | 4026.0  |
| weighted avg | 0.693935 | 0.693966  | 0.693961 | 4026.0  |

The result of Model Number:Dataset Number:Featuregroup Number:Rescale of 12 : 0 : 7 :  
1

|              | f1-score | precision | recall   | support |
|--------------|----------|-----------|----------|---------|
| AFIB         | 0.679491 | 0.704683  | 0.656135 | 204.0   |
| GSVT         | 0.699847 | 0.691097  | 0.708912 | 300.0   |
| SB           | 0.717594 | 0.711046  | 0.724270 | 892.0   |
| SR           | 0.698728 | 0.704151  | 0.693395 | 681.0   |
| macro avg    | 0.698915 | 0.702744  | 0.695678 | 2077.0  |
| micro avg    | 0.705236 | 0.705236  | 0.705236 | 2077.0  |
| weighted avg | 0.705103 | 0.705279  | 0.705236 | 2077.0  |

The result of Model Number:Dataset Number:Featuregroup Number:Rescale of 12 : 0 : 8 :  
0

f1-score precision recall support  
AFIB 0.806487 0.812880 0.800215 875.0  
GSVT 0.816712 0.813111 0.820372 691.0  
SB 0.868477 0.865044 0.871944 1553.0  
SR 0.847136 0.849529 0.844796 907.0  
macro avg 0.834703 0.835141 0.834332 4026.0  
micro avg 0.841387 0.841387 0.841387 4026.0  
weighted avg 0.841312 0.841298 0.841387 4026.0  
The result of Model Number:Dataset Number:Featuregroup Number:Rescale of 12 : 0 : 8 :  
1

f1-score precision recall support  
AFIB 0.661639 0.674337 0.649449 875.0  
GSVT 0.705287 0.706363 0.704258 691.0  
SB 0.767967 0.764592 0.771377 1553.0  
SR 0.725705 0.717816 0.733843 907.0  
macro avg 0.715149 0.715777 0.714732 4026.0  
micro avg 0.724902 0.724902 0.724902 4026.0  
weighted avg 0.724579 0.724444 0.724902 4026.0  
The result of Model Number:Dataset Number:Featuregroup Number:Rescale of 12 : 0 : 9 :  
0

f1-score precision recall support  
AFIB 0.650583 0.656437 0.645037 875.0  
GSVT 0.663835 0.650375 0.678021 691.0  
SB 0.704002 0.696170 0.712096 1553.0  
SR 0.676066 0.696162 0.657256 907.0  
macro avg 0.673621 0.674786 0.673103 4026.0  
micro avg 0.679319 0.679319 0.679319 4026.0  
weighted avg 0.679204 0.679673 0.679319 4026.0  
The result of Model Number:Dataset Number:Featuregroup Number:Rescale of 12 : 0 : 9 :  
1

f1-score precision recall support  
AFIB 0.837174 0.844663 0.829920 875.0  
GSVT 0.853163 0.836940 0.870191 691.0  
SB 0.905561 0.897716 0.913548 1553.0  
SR 0.868367 0.888334 0.849318 907.0  
macro avg 0.866066 0.866913 0.865744 4026.0  
micro avg 0.873461 0.873461 0.873461 4026.0  
weighted avg 0.873325 0.873641 0.873461 4026.0  
The result of Model Number:Dataset Number:Featuregroup Number:Rescale of 12 : 0 :  
10 : 0

f1-score precision recall support  
AFIB 0.748964 0.751766 0.746502 875.0  
GSVT 0.765823 0.773211 0.758728 691.0  
SB 0.814309 0.805768 0.823096 1553.0

SR 0.786111 0.793029 0.779582 907.0  
macro avg 0.778802 0.780943 0.776977 4026.0  
micro avg 0.785598 0.785598 0.785598 4026.0  
weighted avg 0.785433 0.785574 0.785598 4026.0  
The result of Model Number:Dataset Number:Featuregroup Number:Rescale of 12 : 0 :  
10 : 1

f1-score precision recall support  
AFIB 0.744445 0.800407 0.696573 204.0  
GSVT 0.709955 0.732490 0.688873 300.0  
SB 0.739672 0.703070 0.780300 892.0  
SR 0.654776 0.682920 0.628927 681.0  
macro avg 0.712212 0.729722 0.698668 2077.0  
micro avg 0.709239 0.709239 0.709239 2077.0  
weighted avg 0.708013 0.710273 0.709239 2077.0  
The result of Model Number:Dataset Number:Featuregroup Number:Rescale of 12 : 1 : 0 :  
0

f1-score precision recall support  
AFIB 0.839357 0.851738 0.827422 204.0  
GSVT 0.859962 0.856587 0.863392 300.0  
SB 0.879061 0.877298 0.880834 892.0  
SR 0.872826 0.872958 0.872702 681.0  
macro avg 0.862801 0.864645 0.861088 2077.0  
micro avg 0.870403 0.870403 0.870403 2077.0  
weighted avg 0.870358 0.870373 0.870403 2077.0  
The result of Model Number:Dataset Number:Featuregroup Number:Rescale of 12 : 1 : 0 :  
1

f1-score precision recall support  
AFIB 0.769722 0.787263 0.753069 875.0  
GSVT 0.819083 0.820702 0.817744 691.0  
SB 0.896131 0.891226 0.901093 1553.0  
SR 0.846978 0.836704 0.857626 907.0  
macro avg 0.832979 0.833974 0.832383 4026.0  
micro avg 0.844824 0.844824 0.844824 4026.0  
weighted avg 0.844360 0.844244 0.844824 4026.0  
The result of Model Number:Dataset Number:Featuregroup Number:Rescale of 12 : 1 : 1 :  
0

f1-score precision recall support  
AFIB 0.632763 0.680330 0.592072 204.0  
GSVT 0.603447 0.622601 0.585528 300.0  
SB 0.628706 0.597595 0.663239 892.0  
SR 0.556546 0.580468 0.534575 681.0  
macro avg 0.605365 0.620248 0.593853 2077.0  
micro avg 0.602838 0.602838 0.602838 2077.0  
weighted avg 0.601796 0.603717 0.602838 2077.0

The result of Model Number:Dataset Number:Featuregroup Number:Rescale of 12 : 1 : 1 : 1

|              | f1-score | precision | recall   | support |
|--------------|----------|-----------|----------|---------|
| AFIB         | 0.759593 | 0.766518  | 0.752892 | 204.0   |
| GSVT         | 0.779416 | 0.776864  | 0.782009 | 300.0   |
| SB           | 0.793664 | 0.793135  | 0.794197 | 892.0   |
| SR           | 0.786684 | 0.786458  | 0.786921 | 681.0   |
| macro avg    | 0.779839 | 0.780743  | 0.779005 | 2077.0  |
| micro avg    | 0.785994 | 0.785994  | 0.785994 | 2077.0  |
| weighted avg | 0.785971 | 0.785981  | 0.785994 | 2077.0  |

The result of Model Number:Dataset Number:Featuregroup Number:Rescale of 12 : 1 : 2 : 0

|              | f1-score | precision | recall   | support |
|--------------|----------|-----------|----------|---------|
| AFIB         | 0.696309 | 0.696640  | 0.696078 | 875.0   |
| GSVT         | 0.714342 | 0.708159  | 0.720659 | 691.0   |
| SB           | 0.762920 | 0.757360  | 0.768569 | 1553.0  |
| SR           | 0.730327 | 0.744845  | 0.716402 | 907.0   |
| macro avg    | 0.725974 | 0.726751  | 0.725427 | 4026.0  |
| micro avg    | 0.732838 | 0.732838  | 0.732838 | 4026.0  |
| weighted avg | 0.732763 | 0.732899  | 0.732838 | 4026.0  |

The result of Model Number:Dataset Number:Featuregroup Number:Rescale of 12 : 1 : 2 : 1

|              | f1-score | precision | recall   | support |
|--------------|----------|-----------|----------|---------|
| AFIB         | 0.678709 | 0.715910  | 0.645635 | 204.0   |
| GSVT         | 0.646275 | 0.668934  | 0.625181 | 300.0   |
| SB           | 0.664758 | 0.639118  | 0.692551 | 892.0   |
| SR           | 0.591652 | 0.607704  | 0.576460 | 681.0   |
| macro avg    | 0.645349 | 0.657916  | 0.634957 | 2077.0  |
| micro avg    | 0.640149 | 0.640149  | 0.640149 | 2077.0  |
| weighted avg | 0.639489 | 0.640667  | 0.640149 | 2077.0  |

The result of Model Number:Dataset Number:Featuregroup Number:Rescale of 12 : 1 : 3 : 0

|              | f1-score | precision | recall   | support |
|--------------|----------|-----------|----------|---------|
| AFIB         | 0.700666 | 0.729919  | 0.673794 | 875.0   |
| GSVT         | 0.756964 | 0.753132  | 0.760927 | 691.0   |
| SB           | 0.830034 | 0.825363  | 0.834780 | 1553.0  |
| SR           | 0.777202 | 0.759944  | 0.795275 | 907.0   |
| macro avg    | 0.766216 | 0.767089  | 0.766194 | 4026.0  |
| micro avg    | 0.778216 | 0.778216  | 0.778216 | 4026.0  |
| weighted avg | 0.777474 | 0.777484  | 0.778216 | 4026.0  |

The result of Model Number:Dataset Number:Featuregroup Number:Rescale of 12 : 1 : 3 : 1

|      | f1-score | precision | recall   | support |
|------|----------|-----------|----------|---------|
| AFIB | 0.886874 | 0.906355  | 0.868545 | 204.0   |

GSVT 0.915456 0.908057 0.923102 300.0  
SB 0.934642 0.933493 0.935795 892.0  
SR 0.926752 0.925946 0.927565 681.0  
macro avg 0.915931 0.918463 0.913752 2077.0  
micro avg 0.924658 0.924658 0.924658 2077.0  
weighted avg 0.924592 0.924679 0.924658 2077.0  
The result of Model Number:Dataset Number:Featuregroup Number:Rescale of 12 : 1 : 4 :  
0

f1-score precision recall support  
AFIB 0.740013 0.754215 0.726379 875.0  
GSVT 0.788831 0.790034 0.787680 691.0  
SB 0.858936 0.855161 0.862750 1553.0  
SR 0.811668 0.802844 0.820770 907.0  
macro avg 0.799862 0.800564 0.799395 4026.0  
micro avg 0.810770 0.810770 0.810770 4026.0  
weighted avg 0.810408 0.810258 0.810770 4026.0  
The result of Model Number:Dataset Number:Featuregroup Number:Rescale of 12 : 1 : 4 :  
1

f1-score precision recall support  
AFIB 0.783877 0.788179 0.779672 875.0  
GSVT 0.784973 0.775049 0.795278 691.0  
SB 0.825535 0.822223 0.828882 1553.0  
SR 0.807814 0.817620 0.798290 907.0  
macro avg 0.800550 0.800768 0.800530 4026.0  
micro avg 0.805527 0.805527 0.805527 4026.0  
weighted avg 0.805527 0.805690 0.805527 4026.0  
The result of Model Number:Dataset Number:Featuregroup Number:Rescale of 12 : 1 : 5 :  
0

f1-score precision recall support  
AFIB 0.598005 0.594239 0.673611 204.0  
GSVT 0.728978 0.725228 0.732889 300.0  
SB 0.749734 0.746167 0.753344 892.0  
SR 0.588082 0.590019 0.586512 681.0  
macro avg 0.666200 0.663913 0.686589 2077.0  
micro avg 0.687858 0.687858 0.687858 2077.0  
weighted avg 0.678831 0.677023 0.687858 2077.0  
The result of Model Number:Dataset Number:Featuregroup Number:Rescale of 12 : 1 : 5 :  
1

f1-score precision recall support  
AFIB 0.834965 0.854040 0.816934 204.0  
GSVT 0.872896 0.867462 0.878420 300.0  
SB 0.891748 0.888982 0.894544 892.0  
SR 0.881535 0.881943 0.881152 681.0  
macro avg 0.870286 0.873107 0.867762 2077.0



micro avg 0.880201 0.880201 0.880201 2077.0  
weighted avg 0.880099 0.880134 0.880201 2077.0  
The result of Model Number:Dataset Number:Featuregroup Number:Rescale of 12 : 1 : 6 :  
0

|              | f1-score | precision | recall   | support |
|--------------|----------|-----------|----------|---------|
| AFIB         | 0.836570 | 0.876623  | 0.800215 | 204.0   |
| GSVT         | 0.881134 | 0.871701  | 0.890805 | 300.0   |
| SB           | 0.899850 | 0.894879  | 0.904888 | 892.0   |
| SR           | 0.889685 | 0.888913  | 0.890472 | 681.0   |
| macro avg    | 0.876809 | 0.883029  | 0.871595 | 2077.0  |
| micro avg    | 0.887846 | 0.887846  | 0.887846 | 2077.0  |
| weighted avg | 0.887598 | 0.887782  | 0.887846 | 2077.0  |

The result of Model Number:Dataset Number:Featuregroup Number:Rescale of 12 : 1 : 6 :  
1

|              | f1-score | precision | recall   | support |
|--------------|----------|-----------|----------|---------|
| AFIB         | 0.721979 | 0.735224  | 0.709259 | 204.0   |
| GSVT         | 0.731501 | 0.724119  | 0.739051 | 300.0   |
| SB           | 0.749520 | 0.745619  | 0.753467 | 892.0   |
| SR           | 0.739316 | 0.743949  | 0.734757 | 681.0   |
| macro avg    | 0.735579 | 0.737228  | 0.734133 | 2077.0  |
| micro avg    | 0.740908 | 0.740908  | 0.740908 | 2077.0  |
| weighted avg | 0.740867 | 0.740945  | 0.740908 | 2077.0  |

The result of Model Number:Dataset Number:Featuregroup Number:Rescale of 12 : 1 : 7 :  
0

|              | f1-score | precision | recall   | support |
|--------------|----------|-----------|----------|---------|
| AFIB         | 0.833891 | 0.879597  | 0.793254 | 204.0   |
| GSVT         | 0.794041 | 0.821880  | 0.768124 | 300.0   |
| SB           | 0.816749 | 0.785248  | 0.850897 | 892.0   |
| SR           | 0.726929 | 0.746650  | 0.708264 | 681.0   |
| macro avg    | 0.792902 | 0.808344  | 0.780135 | 2077.0  |
| micro avg    | 0.786513 | 0.786513  | 0.786513 | 2077.0  |
| weighted avg | 0.785703 | 0.787151  | 0.786513 | 2077.0  |

The result of Model Number:Dataset Number:Featuregroup Number:Rescale of 12 : 1 : 7 :  
1

|              | f1-score | precision | recall   | support |
|--------------|----------|-----------|----------|---------|
| AFIB         | 0.816743 | 0.829266  | 0.804726 | 204.0   |
| GSVT         | 0.836109 | 0.829015  | 0.843360 | 300.0   |
| SB           | 0.850653 | 0.847908  | 0.853419 | 892.0   |
| SR           | 0.841912 | 0.845037  | 0.838820 | 681.0   |
| macro avg    | 0.836354 | 0.837806  | 0.835081 | 2077.0  |
| micro avg    | 0.842397 | 0.842397  | 0.842397 | 2077.0  |
| weighted avg | 0.842356 | 0.842407  | 0.842397 | 2077.0  |

The result of Model Number:Dataset Number:Featuregroup Number:Rescale of 12 : 1 : 8 :  
0

f1-score precision recall support  
AFIB 0.722530 0.723174 0.721961 875.0  
GSVT 0.735765 0.737695 0.733968 691.0  
SB 0.781024 0.775824 0.786302 1553.0  
SR 0.765807 0.772798 0.758968 907.0  
macro avg 0.751281 0.752373 0.750300 4026.0  
micro avg 0.757178 0.757178 0.757178 4026.0  
weighted avg 0.757115 0.757155 0.757178 4026.0  
The result of Model Number:Dataset Number:Featuregroup Number:Rescale of 12 : 1 : 8 :  
1

f1-score precision recall support  
AFIB 0.640316 0.645378 0.635354 875.0  
GSVT 0.656428 0.655040 0.657846 691.0  
SB 0.699772 0.693586 0.706077 1553.0  
SR 0.681143 0.687823 0.674607 907.0  
macro avg 0.669415 0.670457 0.668471 4026.0  
micro avg 0.675339 0.675339 0.675339 4026.0  
weighted avg 0.675214 0.675195 0.675339 4026.0  
The result of Model Number:Dataset Number:Featuregroup Number:Rescale of 12 : 1 : 9 :  
0

f1-score precision recall support  
AFIB 0.682256 0.698856 0.666594 204.0  
GSVT 0.690832 0.681322 0.700704 300.0  
SB 0.704782 0.697744 0.711968 892.0  
SR 0.692476 0.701564 0.683641 681.0  
macro avg 0.692587 0.694871 0.690727 2077.0  
micro avg 0.696597 0.696597 0.696597 2077.0  
weighted avg 0.696520 0.696733 0.696597 2077.0  
The result of Model Number:Dataset Number:Featuregroup Number:Rescale of 12 : 1 : 9 :  
1

f1-score precision recall support  
AFIB 0.689908 0.681619 0.698425 875.0  
GSVT 0.703177 0.708870 0.697579 691.0  
SB 0.749532 0.746663 0.752426 1553.0  
SR 0.731958 0.741317 0.722841 907.0  
macro avg 0.718643 0.719617 0.717818 4026.0  
micro avg 0.724611 0.724611 0.724611 4026.0  
weighted avg 0.724658 0.724836 0.724611 4026.0  
The result of Model Number:Dataset Number:Featuregroup Number:Rescale of 12 : 1 :  
10 : 0

f1-score precision recall support  
AFIB 0.663429 0.666138 0.660762 875.0  
GSVT 0.617780 0.645045 0.592828 691.0  
SB 0.663459 0.601008 0.740403 1553.0

SR 0.500470 0.622882 0.418438 907.0  
macro avg 0.611284 0.633768 0.603108 4026.0  
micro avg 0.625231 0.625231 0.625231 4026.0  
weighted avg 0.618893 0.627649 0.625231 4026.0  
The result of Model Number:Dataset Number:Featuregroup Number:Rescale of 12 : 1 :  
10 : 1

f1-score precision recall support  
AFIB 0.742112 0.735477 0.748900 875.0  
GSVT 0.754027 0.757010 0.751094 691.0  
SB 0.803954 0.802462 0.805455 1553.0  
SR 0.783582 0.790825 0.776499 907.0  
macro avg 0.770919 0.771444 0.770487 4026.0  
micro avg 0.777310 0.777310 0.777310 4026.0  
weighted avg 0.777355 0.777481 0.777310 4026.0

The result of Model Number:Dataset Number:Featuregroup Number:Rescale of 13 : 0 : 0 :  
0

f1-score precision recall support  
AFIB 0.898706 0.899921 0.897665 875.0  
GSVT 0.912703 0.912234 0.913207 691.0  
SB 0.953224 0.949813 0.956663 1553.0  
SR 0.930397 0.935613 0.925300 907.0  
macro avg 0.923758 0.924395 0.923209 4026.0  
micro avg 0.929316 0.929316 0.929316 4026.0  
weighted avg 0.929278 0.929321 0.929316 4026.0

The result of Model Number:Dataset Number:Featuregroup Number:Rescale of 13 : 0 : 0 :  
1

f1-score precision recall support  
AFIB 0.814251 0.833607 0.795864 204.0  
GSVT 0.835390 0.832166 0.838726 300.0  
SB 0.856090 0.854180 0.858010 892.0  
SR 0.845320 0.843619 0.847058 681.0  
macro avg 0.837763 0.840893 0.834914 2077.0  
micro avg 0.845530 0.845530 0.845530 2077.0  
weighted avg 0.845460 0.845517 0.845530 2077.0

The result of Model Number:Dataset Number:Featuregroup Number:Rescale of 13 : 0 : 1 :  
0

f1-score precision recall support  
AFIB 0.836418 0.876966 0.799546 204.0  
GSVT 0.871252 0.859868 0.883119 300.0  
SB 0.894718 0.887915 0.901640 892.0  
SR 0.869806 0.872405 0.867261 681.0  
macro avg 0.868049 0.874289 0.862891 2077.0  
micro avg 0.877665 0.877665 0.877665 2077.0  
weighted avg 0.877435 0.877703 0.877665 2077.0

The result of Model Number:Dataset Number:Featuregroup Number:Rescale of 13 : 0 : 1 : 1

|              | f1-score | precision | recall   | support |
|--------------|----------|-----------|----------|---------|
| AFIB         | 0.715031 | 0.730090  | 0.700692 | 204.0   |
| GSVT         | 0.737262 | 0.730526  | 0.744140 | 300.0   |
| SB           | 0.749303 | 0.747632  | 0.750983 | 892.0   |
| SR           | 0.740398 | 0.741172  | 0.739634 | 681.0   |
| macro avg    | 0.735498 | 0.737355  | 0.733862 | 2077.0  |
| micro avg    | 0.741334 | 0.741334  | 0.741334 | 2077.0  |
| weighted avg | 0.741278 | 0.741320  | 0.741334 | 2077.0  |

The result of Model Number:Dataset Number:Featuregroup Number:Rescale of 13 : 0 : 2 : 0

|              | f1-score | precision | recall   | support |
|--------------|----------|-----------|----------|---------|
| AFIB         | 0.756920 | 0.764976  | 0.749450 | 204.0   |
| GSVT         | 0.779164 | 0.773973  | 0.784654 | 300.0   |
| SB           | 0.795630 | 0.794919  | 0.796343 | 892.0   |
| SR           | 0.788921 | 0.789974  | 0.787876 | 681.0   |
| macro avg    | 0.780159 | 0.780960  | 0.779581 | 2077.0  |
| micro avg    | 0.787273 | 0.787273  | 0.787273 | 2077.0  |
| weighted avg | 0.787250 | 0.787331  | 0.787273 | 2077.0  |

The result of Model Number:Dataset Number:Featuregroup Number:Rescale of 13 : 0 : 2 : 1

|              | f1-score | precision | recall   | support |
|--------------|----------|-----------|----------|---------|
| AFIB         | 0.710074 | 0.715467  | 0.704822 | 204.0   |
| GSVT         | 0.724611 | 0.717534  | 0.731845 | 300.0   |
| SB           | 0.741513 | 0.739618  | 0.743425 | 892.0   |
| SR           | 0.733648 | 0.737792  | 0.729559 | 681.0   |
| macro avg    | 0.727462 | 0.727603  | 0.727413 | 2077.0  |
| micro avg    | 0.733415 | 0.733415  | 0.733415 | 2077.0  |
| weighted avg | 0.733405 | 0.733458  | 0.733415 | 2077.0  |

The result of Model Number:Dataset Number:Featuregroup Number:Rescale of 13 : 0 : 3 : 0

|              | f1-score | precision | recall   | support |
|--------------|----------|-----------|----------|---------|
| AFIB         | 0.910916 | 0.933982  | 0.889046 | 204.0   |
| GSVT         | 0.930699 | 0.920578  | 0.941199 | 300.0   |
| SB           | 0.956913 | 0.952137  | 0.961740 | 892.0   |
| SR           | 0.942081 | 0.946308  | 0.937930 | 681.0   |
| macro avg    | 0.935152 | 0.938251  | 0.932479 | 2077.0  |
| micro avg    | 0.943826 | 0.943826  | 0.943826 | 2077.0  |
| weighted avg | 0.943746 | 0.943884  | 0.943826 | 2077.0  |

The result of Model Number:Dataset Number:Featuregroup Number:Rescale of 13 : 0 : 3 : 1

|      | f1-score | precision | recall   | support |
|------|----------|-----------|----------|---------|
| AFIB | 0.805702 | 0.807328  | 0.804098 | 204.0   |

GSVT 0.828117 0.825655 0.830598 300.0  
SB 0.841839 0.841088 0.842593 892.0  
SR 0.834602 0.836206 0.833017 681.0  
macro avg 0.827565 0.827569 0.827577 2077.0  
micro avg 0.833940 0.833940 0.833940 2077.0  
weighted avg 0.833935 0.833942 0.833940 2077.0  
The result of Model Number:Dataset Number:Featuregroup Number:Rescale of 13 : 0 : 4 :  
0

f1-score precision recall support  
AFIB 0.644218 0.660285 0.628964 875.0  
GSVT 0.685336 0.687963 0.682760 691.0  
SB 0.742161 0.738568 0.745792 1553.0  
SR 0.703239 0.691517 0.715410 907.0  
macro avg 0.693738 0.694583 0.693231 4026.0  
micro avg 0.702738 0.702738 0.702738 4026.0  
weighted avg 0.702353 0.702269 0.702738 4026.0  
The result of Model Number:Dataset Number:Featuregroup Number:Rescale of 13 : 0 : 4 :  
1

f1-score precision recall support  
AFIB 0.802641 0.806851 0.798522 875.0  
GSVT 0.819424 0.817952 0.820960 691.0  
SB 0.889754 0.882931 0.896686 1553.0  
SR 0.858363 0.866954 0.849945 907.0  
macro avg 0.842545 0.843672 0.841528 4026.0  
micro avg 0.851824 0.851824 0.851824 4026.0  
weighted avg 0.851678 0.851644 0.851824 4026.0  
The result of Model Number:Dataset Number:Featuregroup Number:Rescale of 13 : 0 : 5 :  
0

f1-score precision recall support  
AFIB 0.909839 0.931976 0.888953 204.0  
GSVT 0.921276 0.908594 0.934441 300.0  
SB 0.939879 0.930493 0.949462 892.0  
SR 0.923469 0.935588 0.911686 681.0  
macro avg 0.923616 0.926663 0.921136 2077.0  
micro avg 0.928964 0.928964 0.928964 2077.0  
weighted avg 0.928861 0.929146 0.928964 2077.0  
The result of Model Number:Dataset Number:Featuregroup Number:Rescale of 13 : 0 : 5 :  
1

f1-score precision recall support  
AFIB 0.673045 0.671666 0.674917 875.0  
GSVT 0.682226 0.675064 0.689663 691.0  
SB 0.719519 0.709804 0.729644 1553.0  
SR 0.684507 0.710611 0.660409 907.0  
macro avg 0.689824 0.691786 0.688658 4026.0

micro avg 0.695290 0.695290 0.695290 4026.0  
weighted avg 0.695130 0.695734 0.695290 4026.0  
The result of Model Number:Dataset Number:Featuregroup Number:Rescale of 13 : 0 : 6 :  
0

|              | f1-score | precision | recall   | support |
|--------------|----------|-----------|----------|---------|
| AFIB         | 0.645527 | 0.631660  | 0.660052 | 875.0   |
| GSVT         | 0.668511 | 0.678206  | 0.659134 | 691.0   |
| SB           | 0.711656 | 0.711521  | 0.711795 | 1553.0  |
| SR           | 0.693820 | 0.701884  | 0.685943 | 907.0   |
| macro avg    | 0.679879 | 0.680818  | 0.679231 | 4026.0  |
| micro avg    | 0.685687 | 0.685687  | 0.685687 | 4026.0  |
| weighted avg | 0.685861 | 0.686275  | 0.685687 | 4026.0  |

The result of Model Number:Dataset Number:Featuregroup Number:Rescale of 13 : 0 : 6 :  
1

|              | f1-score | precision | recall   | support |
|--------------|----------|-----------|----------|---------|
| AFIB         | 0.654286 | 0.646653  | 0.663808 | 875.0   |
| GSVT         | 0.673221 | 0.665061  | 0.682126 | 691.0   |
| SB           | 0.683368 | 0.656990  | 0.722060 | 1553.0  |
| SR           | 0.542630 | 0.571253  | 0.516771 | 907.0   |
| macro avg    | 0.638376 | 0.634989  | 0.646191 | 4026.0  |
| micro avg    | 0.656297 | 0.656297  | 0.656297 | 4026.0  |
| weighted avg | 0.643600 | 0.636813  | 0.656297 | 4026.0  |

The result of Model Number:Dataset Number:Featuregroup Number:Rescale of 13 : 0 : 7 :  
0

|              | f1-score | precision | recall   | support |
|--------------|----------|-----------|----------|---------|
| AFIB         | 0.772434 | 0.786860  | 0.855202 | 204.0   |
| GSVT         | 0.927613 | 0.908821  | 0.947667 | 300.0   |
| SB           | 0.763098 | 0.755969  | 0.770372 | 892.0   |
| SR           | 0.928796 | 0.936555  | 0.921293 | 681.0   |
| macro avg    | 0.847985 | 0.847051  | 0.873634 | 2077.0  |
| micro avg    | 0.853796 | 0.853796  | 0.853796 | 2077.0  |
| weighted avg | 0.842106 | 0.840291  | 0.853796 | 2077.0  |

The result of Model Number:Dataset Number:Featuregroup Number:Rescale of 13 : 0 : 7 :  
1

|              | f1-score | precision | recall   | support |
|--------------|----------|-----------|----------|---------|
| AFIB         | 0.737987 | 0.751567  | 0.725264 | 204.0   |
| GSVT         | 0.765214 | 0.758805  | 0.771865 | 300.0   |
| SB           | 0.779583 | 0.778277  | 0.780894 | 892.0   |
| SR           | 0.772700 | 0.773386  | 0.772019 | 681.0   |
| macro avg    | 0.763871 | 0.765509  | 0.762510 | 2077.0  |
| micro avg    | 0.771216 | 0.771216  | 0.771216 | 2077.0  |
| weighted avg | 0.771165 | 0.771237  | 0.771216 | 2077.0  |

The result of Model Number:Dataset Number:Featuregroup Number:Rescale of 13 : 0 : 8 :  
0

f1-score precision recall support  
AFIB 0.735949 0.728547 0.743524 875.0  
GSVT 0.742535 0.749147 0.736094 691.0  
SB 0.785570 0.783159 0.787997 1553.0  
SR 0.770357 0.777100 0.763733 907.0  
macro avg 0.758603 0.759488 0.757837 4026.0  
micro avg 0.763957 0.763957 0.763957 4026.0  
weighted avg 0.763972 0.764087 0.763957 4026.0  
The result of Model Number:Dataset Number:Featuregroup Number:Rescale of 13 : 0 : 8 :  
1

f1-score precision recall support  
AFIB 0.812733 0.846666 0.781563 875.0  
GSVT 0.878036 0.873591 0.882633 691.0  
SB 0.962793 0.957374 0.968299 1553.0  
SR 0.901511 0.881492 0.922474 907.0  
macro avg 0.888768 0.889781 0.888742 4026.0  
micro avg 0.902687 0.902687 0.902687 4026.0  
weighted avg 0.901826 0.901838 0.902687 4026.0  
The result of Model Number:Dataset Number:Featuregroup Number:Rescale of 13 : 0 : 9 :  
0

f1-score precision recall support  
AFIB 0.756619 0.777476 0.737003 204.0  
GSVT 0.776755 0.762376 0.791760 300.0  
SB 0.789352 0.781973 0.796874 892.0  
SR 0.769511 0.779966 0.759347 681.0  
macro avg 0.773059 0.775448 0.771246 2077.0  
micro avg 0.777951 0.777951 0.777951 2077.0  
weighted avg 0.777812 0.778042 0.777951 2077.0  
The result of Model Number:Dataset Number:Featuregroup Number:Rescale of 13 : 0 : 9 :  
1

f1-score precision recall support  
AFIB 0.741807 0.727030 0.757236 875.0  
GSVT 0.603766 0.561470 0.756803 691.0  
SB 0.489889 0.490733 0.489048 1553.0  
SR 0.794173 0.801166 0.787334 907.0  
macro avg 0.657409 0.645100 0.697605 4026.0  
micro avg 0.660491 0.660491 0.660491 4026.0  
weighted avg 0.632736 0.624166 0.660491 4026.0  
The result of Model Number:Dataset Number:Featuregroup Number:Rescale of 13 : 0 :  
10 : 0

f1-score precision recall support  
AFIB 0.758801 0.778016 0.740584 204.0  
GSVT 0.775281 0.766850 0.784028 300.0  
SB 0.797118 0.793139 0.801139 892.0

SR 0.784763 0.788284 0.781304 681.0  
macro avg 0.778991 0.781572 0.776764 2077.0  
micro avg 0.786216 0.786216 0.786216 2077.0  
weighted avg 0.786149 0.786265 0.786216 2077.0  
The result of Model Number:Dataset Number:Featuregroup Number:Rescale of 13 : 0 :  
10 : 1

f1-score precision recall support  
AFIB 0.764769 0.764388 0.765185 875.0  
GSVT 0.774282 0.779462 0.769232 691.0  
SB 0.820845 0.818959 0.822745 1553.0  
SR 0.797070 0.796881 0.797397 907.0  
macro avg 0.789242 0.789923 0.788640 4026.0  
micro avg 0.795340 0.795340 0.795340 4026.0  
weighted avg 0.795310 0.795346 0.795340 4026.0

The result of Model Number:Dataset Number:Featuregroup Number:Rescale of 13 : 1 : 0 :  
0

f1-score precision recall support  
AFIB 0.744109 0.760662 0.728422 204.0  
GSVT 0.775813 0.770992 0.780724 300.0  
SB 0.792654 0.790984 0.794340 892.0  
SR 0.784211 0.783657 0.784791 681.0  
macro avg 0.774197 0.776574 0.772069 2077.0  
micro avg 0.782768 0.782768 0.782768 2077.0  
weighted avg 0.782685 0.782716 0.782768 2077.0

The result of Model Number:Dataset Number:Featuregroup Number:Rescale of 13 : 1 : 0 :  
1

f1-score precision recall support  
AFIB 0.704472 0.711312 0.698200 204.0  
GSVT 0.725589 0.722160 0.729244 300.0  
SB 0.740283 0.739457 0.741112 892.0  
SR 0.733769 0.734529 0.733015 681.0  
macro avg 0.726028 0.726864 0.725393 2077.0  
micro avg 0.732528 0.732528 0.732528 2077.0  
weighted avg 0.732508 0.732578 0.732528 2077.0

The result of Model Number:Dataset Number:Featuregroup Number:Rescale of 13 : 1 : 1 :  
0

f1-score precision recall support  
AFIB 0.882246 0.882481 0.882164 875.0  
GSVT 0.897609 0.894295 0.901060 691.0  
SB 0.960266 0.957935 0.962613 1553.0  
SR 0.937365 0.944092 0.930759 907.0  
macro avg 0.919371 0.919701 0.919149 4026.0  
micro avg 0.927388 0.927388 0.927388 4026.0  
weighted avg 0.927396 0.927495 0.927388 4026.0



The result of Model Number:Dataset Number:Featuregroup Number:Rescale of 13 : 1 : 1 : 1

|              | f1-score | precision | recall   | support |
|--------------|----------|-----------|----------|---------|
| AFIB         | 0.807821 | 0.797097  | 0.818901 | 875.0   |
| GSVT         | 0.824218 | 0.832031  | 0.816585 | 691.0   |
| SB           | 0.877086 | 0.875011  | 0.879174 | 1553.0  |
| SR           | 0.853292 | 0.862264  | 0.844539 | 907.0   |
| macro avg    | 0.840604 | 0.841601  | 0.839800 | 4026.0  |
| micro avg    | 0.847529 | 0.847529  | 0.847529 | 4026.0  |
| weighted avg | 0.847597 | 0.847829  | 0.847529 | 4026.0  |

The result of Model Number:Dataset Number:Featuregroup Number:Rescale of 13 : 1 : 2 : 0

|              | f1-score | precision | recall   | support |
|--------------|----------|-----------|----------|---------|
| AFIB         | 0.721306 | 0.727759  | 0.715057 | 875.0   |
| GSVT         | 0.735083 | 0.721105  | 0.749754 | 691.0   |
| SB           | 0.780229 | 0.773470  | 0.787110 | 1553.0  |
| SR           | 0.748183 | 0.765386  | 0.731770 | 907.0   |
| macro avg    | 0.746200 | 0.746930  | 0.745923 | 4026.0  |
| micro avg    | 0.752571 | 0.752571  | 0.752571 | 4026.0  |
| weighted avg | 0.752455 | 0.752726  | 0.752571 | 4026.0  |

The result of Model Number:Dataset Number:Featuregroup Number:Rescale of 13 : 1 : 2 : 1

|              | f1-score | precision | recall   | support |
|--------------|----------|-----------|----------|---------|
| AFIB         | 0.735173 | 0.735278  | 0.735164 | 875.0   |
| GSVT         | 0.748013 | 0.741812  | 0.754374 | 691.0   |
| SB           | 0.783159 | 0.776384  | 0.790066 | 1553.0  |
| SR           | 0.757352 | 0.774461  | 0.741009 | 907.0   |
| macro avg    | 0.755924 | 0.756984  | 0.755153 | 4026.0  |
| micro avg    | 0.760956 | 0.760956  | 0.760956 | 4026.0  |
| weighted avg | 0.760884 | 0.761083  | 0.760956 | 4026.0  |

The result of Model Number:Dataset Number:Featuregroup Number:Rescale of 13 : 1 : 3 : 0

|              | f1-score | precision | recall   | support |
|--------------|----------|-----------|----------|---------|
| AFIB         | 0.799413 | 0.799794  | 0.799148 | 875.0   |
| GSVT         | 0.820117 | 0.813018  | 0.827369 | 691.0   |
| SB           | 0.875887 | 0.869505  | 0.882373 | 1553.0  |
| SR           | 0.838468 | 0.855136  | 0.822481 | 907.0   |
| macro avg    | 0.833471 | 0.834363  | 0.832843 | 4026.0  |
| micro avg    | 0.841352 | 0.841352  | 0.841352 | 4026.0  |
| weighted avg | 0.841265 | 0.841422  | 0.841352 | 4026.0  |

The result of Model Number:Dataset Number:Featuregroup Number:Rescale of 13 : 1 : 3 : 1

|      | f1-score | precision | recall   | support |
|------|----------|-----------|----------|---------|
| AFIB | 0.708753 | 0.721796  | 0.696534 | 204.0   |

GSVT 0.734902 0.728747 0.741290 300.0  
SB 0.748702 0.747447 0.749961 892.0  
SR 0.742091 0.742750 0.741437 681.0  
macro avg 0.733612 0.735185 0.732306 2077.0  
micro avg 0.740666 0.740666 0.740666 2077.0  
weighted avg 0.740617 0.740687 0.740666 2077.0  
The result of Model Number:Dataset Number:Featuregroup Number:Rescale of 13 : 1 : 4 :  
0

f1-score precision recall support  
AFIB 0.757370 0.758726 0.756042 875.0  
GSVT 0.725233 0.729042 0.721483 691.0  
SB 0.767120 0.724921 0.814542 1553.0  
SR 0.637097 0.717099 0.573209 907.0  
macro avg 0.721705 0.732447 0.716319 4026.0  
micro avg 0.731487 0.731487 0.731487 4026.0  
weighted avg 0.728519 0.731213 0.731487 4026.0  
The result of Model Number:Dataset Number:Featuregroup Number:Rescale of 13 : 1 : 4 :  
1

f1-score precision recall support  
AFIB 0.676823 0.668403 0.685533 875.0  
GSVT 0.698013 0.706754 0.689555 691.0  
SB 0.744682 0.743875 0.745496 1553.0  
SR 0.724597 0.728313 0.720923 907.0  
macro avg 0.711029 0.711836 0.710377 4026.0  
micro avg 0.717326 0.717326 0.717326 4026.0  
weighted avg 0.717399 0.717595 0.717326 4026.0  
The result of Model Number:Dataset Number:Featuregroup Number:Rescale of 13 : 1 : 5 :  
0

f1-score precision recall support  
AFIB 0.802274 0.790194 0.821409 875.0  
GSVT 0.766027 0.763797 0.772562 691.0  
SB 0.818018 0.762262 0.889377 1553.0  
SR 0.605957 0.809985 0.502108 907.0  
macro avg 0.748069 0.781560 0.746364 4026.0  
micro avg 0.767309 0.767309 0.767309 4026.0  
weighted avg 0.757899 0.779348 0.767309 4026.0  
The result of Model Number:Dataset Number:Featuregroup Number:Rescale of 13 : 1 : 5 :  
1

f1-score precision recall support  
AFIB 0.719186 0.714483 0.724014 875.0  
GSVT 0.740562 0.746863 0.734465 691.0  
SB 0.788428 0.786711 0.790154 1553.0  
SR 0.769213 0.772302 0.766161 907.0  
macro avg 0.754347 0.755090 0.753698 4026.0

micro avg 0.760816 0.760816 0.760816 4026.0  
weighted avg 0.760835 0.760928 0.760816 4026.0  
The result of Model Number:Dataset Number:Featuregroup Number:Rescale of 13 : 1 : 6 :  
0

|              | f1-score | precision | recall   | support |
|--------------|----------|-----------|----------|---------|
| AFIB         | 0.888444 | 0.876138  | 0.901136 | 875.0   |
| GSVT         | 0.908149 | 0.915499  | 0.900921 | 691.0   |
| SB           | 0.963989 | 0.961219  | 0.966782 | 1553.0  |
| SR           | 0.940539 | 0.952780  | 0.928617 | 907.0   |
| macro avg    | 0.925280 | 0.926409  | 0.924364 | 4026.0  |
| micro avg    | 0.932613 | 0.932613  | 0.932613 | 4026.0  |
| weighted avg | 0.932703 | 0.932980  | 0.932613 | 4026.0  |

The result of Model Number:Dataset Number:Featuregroup Number:Rescale of 13 : 1 : 6 :  
1

|              | f1-score | precision | recall   | support |
|--------------|----------|-----------|----------|---------|
| AFIB         | 0.833768 | 0.831457  | 0.836154 | 875.0   |
| GSVT         | 0.840366 | 0.844375  | 0.836480 | 691.0   |
| SB           | 0.879716 | 0.876905  | 0.882548 | 1553.0  |
| SR           | 0.865652 | 0.869833  | 0.861551 | 907.0   |
| macro avg    | 0.854876 | 0.855643  | 0.854183 | 4026.0  |
| micro avg    | 0.859828 | 0.859828  | 0.859828 | 4026.0  |
| weighted avg | 0.859808 | 0.859851  | 0.859828 | 4026.0  |

The result of Model Number:Dataset Number:Featuregroup Number:Rescale of 13 : 1 : 7 :  
0

|              | f1-score | precision | recall   | support |
|--------------|----------|-----------|----------|---------|
| AFIB         | 0.673414 | 0.698275  | 0.650324 | 204.0   |
| GSVT         | 0.687807 | 0.680748  | 0.695121 | 300.0   |
| SB           | 0.706645 | 0.703350  | 0.709973 | 892.0   |
| SR           | 0.695627 | 0.696063  | 0.695215 | 681.0   |
| macro avg    | 0.690873 | 0.694609  | 0.687658 | 2077.0  |
| micro avg    | 0.697130 | 0.697130  | 0.697130 | 2077.0  |
| weighted avg | 0.697048 | 0.697198  | 0.697130 | 2077.0  |

The result of Model Number:Dataset Number:Featuregroup Number:Rescale of 13 : 1 : 7 :  
1

|              | f1-score | precision | recall   | support |
|--------------|----------|-----------|----------|---------|
| AFIB         | 0.778525 | 0.788924  | 0.768616 | 204.0   |
| GSVT         | 0.792278 | 0.787451  | 0.797285 | 300.0   |
| SB           | 0.811376 | 0.810657  | 0.812102 | 892.0   |
| SR           | 0.805380 | 0.805503  | 0.805263 | 681.0   |
| macro avg    | 0.796890 | 0.798134  | 0.795817 | 2077.0  |
| micro avg    | 0.803448 | 0.803448  | 0.803448 | 2077.0  |
| weighted avg | 0.803425 | 0.803480  | 0.803448 | 2077.0  |

The result of Model Number:Dataset Number:Featuregroup Number:Rescale of 13 : 1 : 8 :  
0

f1-score precision recall support  
AFIB 0.923464 0.940080 0.907698 204.0  
GSVT 0.944298 0.931021 0.958116 300.0  
SB 0.958827 0.947499 0.970435 892.0  
SR 0.939544 0.956271 0.923402 681.0  
macro avg 0.941533 0.943718 0.939913 2077.0  
micro avg 0.947073 0.947073 0.947073 2077.0  
weighted avg 0.946933 0.947266 0.947073 2077.0  
The result of Model Number:Dataset Number:Featuregroup Number:Rescale of 13 : 1 : 8 :  
1

f1-score precision recall support  
AFIB 0.693819 0.687683 0.700095 875.0  
GSVT 0.630802 0.610884 0.701780 691.0  
SB 0.568702 0.546033 0.604154 1553.0  
SR 0.586130 0.592195 0.580226 907.0  
macro avg 0.619864 0.609199 0.646564 4026.0  
micro avg 0.636371 0.636371 0.636371 4026.0  
weighted avg 0.610480 0.598349 0.636371 4026.0  
The result of Model Number:Dataset Number:Featuregroup Number:Rescale of 13 : 1 : 9 :  
0

f1-score precision recall support  
AFIB 0.674610 0.673525 0.675975 875.0  
GSVT 0.690339 0.686741 0.694015 691.0  
SB 0.721786 0.715670 0.728012 1553.0  
SR 0.694232 0.709666 0.679689 907.0  
macro avg 0.695242 0.696400 0.694423 4026.0  
micro avg 0.699981 0.699981 0.699981 4026.0  
weighted avg 0.699928 0.700193 0.699981 4026.0  
The result of Model Number:Dataset Number:Featuregroup Number:Rescale of 13 : 1 : 9 :  
1

f1-score precision recall support  
AFIB 0.640915 0.622450 0.703207 875.0  
GSVT 0.706375 0.704118 0.708736 691.0  
SB 0.596284 0.587496 0.605387 1553.0  
SR 0.713979 0.727915 0.700656 907.0  
macro avg 0.664388 0.660495 0.679497 4026.0  
micro avg 0.665848 0.665848 0.665848 4026.0  
weighted avg 0.651394 0.646744 0.665848 4026.0  
The result of Model Number:Dataset Number:Featuregroup Number:Rescale of 13 : 1 :  
10 : 0

f1-score precision recall support  
AFIB 0.735066 0.733507 0.736667 875.0  
GSVT 0.746550 0.742972 0.750226 691.0  
SB 0.785741 0.776361 0.795353 1553.0

SR 0.749226 0.770453 0.729154 907.0  
macro avg 0.754146 0.755823 0.752850 4026.0  
micro avg 0.759939 0.759939 0.759939 4026.0  
weighted avg 0.759775 0.759985 0.759939 4026.0  
The result of Model Number:Dataset Number:Featuregroup Number:Rescale of 13 : 1 :  
10 : 1

f1-score precision recall support  
AFIB 0.806853 0.812289 0.801608 875.0  
GSVT 0.821252 0.809845 0.833136 691.0  
SB 0.875134 0.869141 0.881217 1553.0  
SR 0.839670 0.854174 0.825696 907.0  
macro avg 0.835727 0.836362 0.835414 4026.0  
micro avg 0.843155 0.843155 0.843155 4026.0  
weighted avg 0.843056 0.843236 0.843155 4026.0

The result of Model Number:Dataset Number:Featuregroup Number:Rescale of 14 : 0 : 0 :  
0

f1-score precision recall support  
AFIB 0.745856 0.786737 0.709509 204.0  
GSVT 0.710213 0.735113 0.687032 300.0  
SB 0.730524 0.702348 0.761067 892.0  
SR 0.650186 0.667826 0.633491 681.0  
macro avg 0.709195 0.723006 0.697775 2077.0  
micro avg 0.703480 0.703480 0.703480 2077.0  
weighted avg 0.702755 0.704050 0.703480 2077.0

The result of Model Number:Dataset Number:Featuregroup Number:Rescale of 14 : 0 : 0 :  
1

f1-score precision recall support  
AFIB 0.806809 0.836824 0.779235 204.0  
GSVT 0.748689 0.783431 0.716966 300.0  
SB 0.784281 0.736977 0.838088 892.0  
SR 0.688750 0.736604 0.646815 681.0  
macro avg 0.757132 0.773459 0.745276 2077.0  
micro avg 0.752099 0.752099 0.752099 2077.0  
weighted avg 0.750031 0.753371 0.752099 2077.0

The result of Model Number:Dataset Number:Featuregroup Number:Rescale of 14 : 0 : 1 :  
0

f1-score precision recall support  
AFIB 0.880463 0.926822 0.838757 204.0  
GSVT 0.924676 0.916577 0.932961 300.0  
SB 0.948669 0.942813 0.954616 892.0  
SR 0.935727 0.933829 0.937655 681.0  
macro avg 0.922384 0.930010 0.915997 2077.0  
micro avg 0.934548 0.934548 0.934548 2077.0  
weighted avg 0.934261 0.934507 0.934548 2077.0

The result of Model Number:Dataset Number:Featuregroup Number:Rescale of 14 : 0 : 1 : 1

|              | f1-score | precision | recall   | support |
|--------------|----------|-----------|----------|---------|
| AFIB         | 0.633506 | 0.589113  | 0.743933 | 875.0   |
| GSVT         | 0.543313 | 0.507259  | 0.614542 | 691.0   |
| SB           | 0.649224 | 0.643747  | 0.654811 | 1553.0  |
| SR           | 0.625758 | 0.640926  | 0.611510 | 907.0   |
| macro avg    | 0.612950 | 0.595261  | 0.656199 | 4026.0  |
| micro avg    | 0.657514 | 0.657514  | 0.657514 | 4026.0  |
| weighted avg | 0.622343 | 0.607811  | 0.657514 | 4026.0  |

The result of Model Number:Dataset Number:Featuregroup Number:Rescale of 14 : 0 : 2 : 0

|              | f1-score | precision | recall   | support |
|--------------|----------|-----------|----------|---------|
| AFIB         | 0.806872 | 0.839439  | 0.776802 | 204.0   |
| GSVT         | 0.836898 | 0.823303  | 0.851094 | 300.0   |
| SB           | 0.858549 | 0.851647  | 0.865575 | 892.0   |
| SR           | 0.835451 | 0.841467  | 0.829564 | 681.0   |
| macro avg    | 0.834443 | 0.838964  | 0.830759 | 2077.0  |
| micro avg    | 0.842957 | 0.842957  | 0.842957 | 2077.0  |
| weighted avg | 0.842773 | 0.843016  | 0.842957 | 2077.0  |

The result of Model Number:Dataset Number:Featuregroup Number:Rescale of 14 : 0 : 2 : 1

|              | f1-score | precision | recall   | support |
|--------------|----------|-----------|----------|---------|
| AFIB         | 0.683449 | 0.688232  | 0.678757 | 204.0   |
| GSVT         | 0.699350 | 0.695903  | 0.702843 | 300.0   |
| SB           | 0.713250 | 0.712063  | 0.714450 | 892.0   |
| SR           | 0.706152 | 0.707828  | 0.704491 | 681.0   |
| macro avg    | 0.700550 | 0.701006  | 0.700135 | 2077.0  |
| micro avg    | 0.706003 | 0.706003  | 0.706003 | 2077.0  |
| weighted avg | 0.705988 | 0.706000  | 0.706003 | 2077.0  |

The result of Model Number:Dataset Number:Featuregroup Number:Rescale of 14 : 0 : 3 : 0

|              | f1-score | precision | recall   | support |
|--------------|----------|-----------|----------|---------|
| AFIB         | 0.726984 | 0.733526  | 0.720787 | 875.0   |
| GSVT         | 0.741793 | 0.726752  | 0.757645 | 691.0   |
| SB           | 0.786677 | 0.777925  | 0.795722 | 1553.0  |
| SR           | 0.755460 | 0.777917  | 0.734442 | 907.0   |
| macro avg    | 0.752729 | 0.754030  | 0.752149 | 4026.0  |
| micro avg    | 0.759095 | 0.759095  | 0.759095 | 4026.0  |
| weighted avg | 0.758967 | 0.759490  | 0.759095 | 4026.0  |

The result of Model Number:Dataset Number:Featuregroup Number:Rescale of 14 : 0 : 3 : 1

|      | f1-score | precision | recall   | support |
|------|----------|-----------|----------|---------|
| AFIB | 0.864154 | 0.858314  | 0.870192 | 875.0   |

GSVT 0.885236 0.885589 0.884998 691.0  
SB 0.940383 0.937984 0.942805 1553.0  
SR 0.914778 0.924999 0.904793 907.0  
macro avg 0.901138 0.901721 0.900697 4026.0  
micro avg 0.908538 0.908538 0.908538 4026.0  
weighted avg 0.908582 0.908750 0.908538 4026.0  
The result of Model Number:Dataset Number:Featuregroup Number:Rescale of 14 : 0 : 4 :  
0

f1-score precision recall support  
AFIB 0.735523 0.744123 0.727261 204.0  
GSVT 0.755757 0.752282 0.759285 300.0  
SB 0.766457 0.764074 0.768861 892.0  
SR 0.759856 0.762010 0.757747 681.0  
macro avg 0.754399 0.755622 0.753289 2077.0  
micro avg 0.759748 0.759748 0.759748 2077.0  
weighted avg 0.759709 0.759735 0.759748 2077.0  
The result of Model Number:Dataset Number:Featuregroup Number:Rescale of 14 : 0 : 4 :  
1

f1-score precision recall support  
AFIB 0.862852 0.870377 0.855671 204.0  
GSVT 0.892692 0.891235 0.894176 300.0  
SB 0.911667 0.909443 0.913912 892.0  
SR 0.903309 0.904670 0.901982 681.0  
macro avg 0.892630 0.893931 0.891435 2077.0  
micro avg 0.901429 0.901429 0.901429 2077.0  
weighted avg 0.901391 0.901411 0.901429 2077.0  
The result of Model Number:Dataset Number:Featuregroup Number:Rescale of 14 : 0 : 5 :  
0

f1-score precision recall support  
AFIB 0.822802 0.821116 0.825091 875.0  
GSVT 0.834026 0.825271 0.843119 691.0  
SB 0.879617 0.867740 0.891996 1553.0  
SR 0.836815 0.868727 0.807355 907.0  
macro avg 0.843315 0.845714 0.841890 4026.0  
micro avg 0.849997 0.849997 0.849997 4026.0  
weighted avg 0.849801 0.850540 0.849997 4026.0  
The result of Model Number:Dataset Number:Featuregroup Number:Rescale of 14 : 0 : 5 :  
1

f1-score precision recall support  
AFIB 0.686313 0.692544 0.680545 204.0  
GSVT 0.708996 0.704711 0.713519 300.0  
SB 0.723828 0.722859 0.724802 892.0  
SR 0.717131 0.718618 0.715655 681.0  
macro avg 0.709067 0.709683 0.708630 2077.0

micro avg 0.715826 0.715826 0.715826 2077.0  
weighted avg 0.715805 0.715869 0.715826 2077.0  
The result of Model Number:Dataset Number:Featuregroup Number:Rescale of 14 : 0 : 6 :  
0

|              | f1-score | precision | recall   | support |
|--------------|----------|-----------|----------|---------|
| AFIB         | 0.701402 | 0.686414  | 0.717100 | 875.0   |
| GSVT         | 0.726346 | 0.737453  | 0.715634 | 691.0   |
| SB           | 0.774284 | 0.774386  | 0.774185 | 1553.0  |
| SR           | 0.754336 | 0.762148  | 0.746686 | 907.0   |
| macro avg    | 0.739092 | 0.740100  | 0.738401 | 4026.0  |
| micro avg    | 0.745534 | 0.745534  | 0.745534 | 4026.0  |
| weighted avg | 0.745722 | 0.746170  | 0.745534 | 4026.0  |

The result of Model Number:Dataset Number:Featuregroup Number:Rescale of 14 : 0 : 6 :  
1

|              | f1-score | precision | recall   | support |
|--------------|----------|-----------|----------|---------|
| AFIB         | 0.708321 | 0.716603  | 0.700359 | 204.0   |
| GSVT         | 0.638909 | 0.614516  | 0.728986 | 300.0   |
| SB           | 0.592777 | 0.591380  | 0.594186 | 892.0   |
| SR           | 0.736029 | 0.737443  | 0.734625 | 681.0   |
| macro avg    | 0.669009 | 0.664986  | 0.689539 | 2077.0  |
| micro avg    | 0.670131 | 0.670131  | 0.670131 | 2077.0  |
| weighted avg | 0.657757 | 0.654912  | 0.670131 | 2077.0  |

The result of Model Number:Dataset Number:Featuregroup Number:Rescale of 14 : 0 : 7 :  
0

|              | f1-score | precision | recall   | support |
|--------------|----------|-----------|----------|---------|
| AFIB         | 0.761735 | 0.773284  | 0.750545 | 204.0   |
| GSVT         | 0.773983 | 0.767459  | 0.780661 | 300.0   |
| SB           | 0.791151 | 0.788599  | 0.793722 | 892.0   |
| SR           | 0.782659 | 0.785566  | 0.779794 | 681.0   |
| macro avg    | 0.777382 | 0.778727  | 0.776181 | 2077.0  |
| micro avg    | 0.783028 | 0.783028  | 0.783028 | 2077.0  |
| weighted avg | 0.782998 | 0.783047  | 0.783028 | 2077.0  |

The result of Model Number:Dataset Number:Featuregroup Number:Rescale of 14 : 0 : 7 :  
1

|              | f1-score | precision | recall   | support |
|--------------|----------|-----------|----------|---------|
| AFIB         | 0.720070 | 0.726350  | 0.714077 | 204.0   |
| GSVT         | 0.744972 | 0.743756  | 0.746211 | 300.0   |
| SB           | 0.760807 | 0.758952  | 0.762681 | 892.0   |
| SR           | 0.753832 | 0.754968  | 0.752725 | 681.0   |
| macro avg    | 0.744920 | 0.746007  | 0.743923 | 2077.0  |
| micro avg    | 0.752264 | 0.752264  | 0.752264 | 2077.0  |
| weighted avg | 0.752232 | 0.752249  | 0.752264 | 2077.0  |

The result of Model Number:Dataset Number:Featuregroup Number:Rescale of 14 : 0 : 8 :  
0



f1-score precision recall support  
AFIB 0.755989 0.760138 0.751933 875.0  
GSVT 0.757046 0.747475 0.766984 691.0  
SB 0.796165 0.792970 0.799393 1553.0  
SR 0.779074 0.788532 0.769889 907.0  
macro avg 0.772069 0.772279 0.772050 4026.0  
micro avg 0.776869 0.776869 0.776869 4026.0  
weighted avg 0.776869 0.777026 0.776869 4026.0  
The result of Model Number:Dataset Number:Featuregroup Number:Rescale of 14 : 0 : 8 :  
1

f1-score precision recall support  
AFIB 0.698566 0.700302 0.696887 875.0  
GSVT 0.710597 0.712732 0.708564 691.0  
SB 0.753815 0.748698 0.759007 1553.0  
SR 0.739471 0.744960 0.734090 907.0  
macro avg 0.725612 0.726673 0.724637 4026.0  
micro avg 0.731235 0.731235 0.731235 4026.0  
weighted avg 0.731158 0.731165 0.731235 4026.0  
The result of Model Number:Dataset Number:Featuregroup Number:Rescale of 14 : 0 : 9 :  
0

f1-score precision recall support  
AFIB 0.624397 0.688577 0.571544 204.0  
GSVT 0.743014 0.732973 0.753408 300.0  
SB 0.791257 0.788093 0.794450 892.0  
SR 0.769781 0.759375 0.780509 681.0  
macro avg 0.732112 0.742255 0.724978 2077.0  
micro avg 0.762058 0.762058 0.762058 2077.0  
weighted avg 0.760859 0.760941 0.762058 2077.0  
The result of Model Number:Dataset Number:Featuregroup Number:Rescale of 14 : 0 : 9 :  
1

f1-score precision recall support  
AFIB 0.868224 0.863877 0.872902 875.0  
GSVT 0.887841 0.889042 0.886822 691.0  
SB 0.945429 0.942316 0.948589 1553.0  
SR 0.917664 0.927189 0.908442 907.0  
macro avg 0.904790 0.905606 0.904189 4026.0  
micro avg 0.912494 0.912494 0.912494 4026.0  
weighted avg 0.912511 0.912716 0.912494 4026.0  
The result of Model Number:Dataset Number:Featuregroup Number:Rescale of 14 : 0 :  
10 : 0

f1-score precision recall support  
AFIB 0.691525 0.736582 0.651968 204.0  
GSVT 0.721819 0.704077 0.740577 300.0  
SB 0.742988 0.733444 0.752810 892.0

SR 0.723690 0.732331 0.715298 681.0  
macro avg 0.720005 0.726608 0.715163 2077.0  
micro avg 0.728839 0.728839 0.728839 2077.0  
weighted avg 0.728548 0.729145 0.728839 2077.0  
The result of Model Number:Dataset Number:Featuregroup Number:Rescale of 14 : 0 :  
10 : 1

f1-score precision recall support  
AFIB 0.779574 0.783837 0.775383 875.0  
GSVT 0.775859 0.769317 0.782590 691.0  
SB 0.816009 0.808281 0.823890 1553.0  
SR 0.785640 0.800295 0.771523 907.0  
macro avg 0.789270 0.790433 0.788346 4026.0  
micro avg 0.794461 0.794461 0.794461 4026.0  
weighted avg 0.794357 0.794482 0.794461 4026.0

The result of Model Number:Dataset Number:Featuregroup Number:Rescale of 14 : 1 : 0 :  
0

f1-score precision recall support  
AFIB 0.845629 0.854629 0.837284 204.0  
GSVT 0.870480 0.864680 0.876614 300.0  
SB 0.888875 0.888081 0.889672 892.0  
SR 0.881381 0.882557 0.880213 681.0  
macro avg 0.871591 0.872487 0.870946 2077.0  
micro avg 0.879539 0.879539 0.879539 2077.0  
weighted avg 0.879513 0.879604 0.879539 2077.0

The result of Model Number:Dataset Number:Featuregroup Number:Rescale of 14 : 1 : 0 :  
1

f1-score precision recall support  
AFIB 0.749176 0.771896 0.727787 875.0  
GSVT 0.799756 0.794210 0.805423 691.0  
SB 0.875031 0.871684 0.878410 1553.0  
SR 0.827568 0.815147 0.840422 907.0  
macro avg 0.812883 0.813234 0.813011 4026.0  
micro avg 0.824589 0.824589 0.824589 4026.0  
weighted avg 0.824066 0.823962 0.824589 4026.0

The result of Model Number:Dataset Number:Featuregroup Number:Rescale of 14 : 1 : 1 :  
0

f1-score precision recall support  
AFIB 0.909513 0.926205 0.893851 204.0  
GSVT 0.944040 0.936449 0.951927 300.0  
SB 0.961552 0.959835 0.963277 892.0  
SR 0.952031 0.952879 0.951190 681.0  
macro avg 0.941784 0.943842 0.940061 2077.0  
micro avg 0.950856 0.950856 0.950856 2077.0  
weighted avg 0.950790 0.950874 0.950856 2077.0

The result of Model Number:Dataset Number:Featuregroup Number:Rescale of 14 : 1 : 1 : 1

|              | f1-score | precision | recall   | support |
|--------------|----------|-----------|----------|---------|
| AFIB         | 0.789723 | 0.766970  | 0.866478 | 875.0   |
| GSVT         | 0.870380 | 0.867600  | 0.873290 | 691.0   |
| SB           | 0.734729 | 0.723901  | 0.745946 | 1553.0  |
| SR           | 0.879750 | 0.896921  | 0.863335 | 907.0   |
| macro avg    | 0.818646 | 0.813848  | 0.837262 | 4026.0  |
| micro avg    | 0.820445 | 0.820445  | 0.820445 | 4026.0  |
| weighted avg | 0.802635 | 0.796904  | 0.820445 | 4026.0  |

The result of Model Number:Dataset Number:Featuregroup Number:Rescale of 14 : 1 : 2 : 0

|              | f1-score | precision | recall   | support |
|--------------|----------|-----------|----------|---------|
| AFIB         | 0.908207 | 0.921409  | 0.895789 | 204.0   |
| GSVT         | 0.928237 | 0.915679  | 0.941219 | 300.0   |
| SB           | 0.942207 | 0.932388  | 0.952242 | 892.0   |
| SR           | 0.923533 | 0.938815  | 0.908756 | 681.0   |
| macro avg    | 0.925546 | 0.927073  | 0.924502 | 2077.0  |
| micro avg    | 0.930847 | 0.930847  | 0.930847 | 2077.0  |
| weighted avg | 0.930727 | 0.931003  | 0.930847 | 2077.0  |

The result of Model Number:Dataset Number:Featuregroup Number:Rescale of 14 : 1 : 2 : 1

|              | f1-score | precision | recall   | support |
|--------------|----------|-----------|----------|---------|
| AFIB         | 0.752594 | 0.764134  | 0.741522 | 204.0   |
| GSVT         | 0.770439 | 0.763903  | 0.777121 | 300.0   |
| SB           | 0.783841 | 0.781312  | 0.786390 | 892.0   |
| SR           | 0.775787 | 0.778666  | 0.772938 | 681.0   |
| macro avg    | 0.770665 | 0.772004  | 0.769493 | 2077.0  |
| micro avg    | 0.776234 | 0.776234  | 0.776234 | 2077.0  |
| weighted avg | 0.776196 | 0.776243  | 0.776234 | 2077.0  |

The result of Model Number:Dataset Number:Featuregroup Number:Rescale of 14 : 1 : 3 : 0

|              | f1-score | precision | recall   | support |
|--------------|----------|-----------|----------|---------|
| AFIB         | 0.795560 | 0.793260  | 0.797946 | 875.0   |
| GSVT         | 0.810305 | 0.809646  | 0.811022 | 691.0   |
| SB           | 0.860662 | 0.857097  | 0.864263 | 1553.0  |
| SR           | 0.834823 | 0.843995  | 0.825895 | 907.0   |
| macro avg    | 0.825338 | 0.825999  | 0.824781 | 4026.0  |
| micro avg    | 0.832068 | 0.832068  | 0.832068 | 4026.0  |
| weighted avg | 0.832049 | 0.832127  | 0.832068 | 4026.0  |

The result of Model Number:Dataset Number:Featuregroup Number:Rescale of 14 : 1 : 3 : 1

|      | f1-score | precision | recall   | support |
|------|----------|-----------|----------|---------|
| AFIB | 0.720215 | 0.733665  | 0.797388 | 204.0   |

GSVT 0.864903 0.847382 0.883601 300.0  
SB 0.711510 0.704862 0.718292 892.0  
SR 0.866006 0.873240 0.859011 681.0  
macro avg 0.790658 0.789787 0.814573 2077.0  
micro avg 0.796076 0.796076 0.796076 2077.0  
weighted avg 0.785176 0.783484 0.796076 2077.0  
The result of Model Number:Dataset Number:Featuregroup Number:Rescale of 14 : 1 : 4 :  
0

f1-score precision recall support

AFIB 0.754484 0.769019 0.740844 204.0  
GSVT 0.768652 0.756162 0.781700 300.0  
SB 0.781484 0.772164 0.791034 892.0  
SR 0.766947 0.781326 0.753100 681.0  
macro avg 0.767891 0.769668 0.766670 2077.0  
micro avg 0.772319 0.772319 0.772319 2077.0  
weighted avg 0.772212 0.772548 0.772319 2077.0

The result of Model Number:Dataset Number:Featuregroup Number:Rescale of 14 : 1 : 4 :  
1

f1-score precision recall support

AFIB 0.765585 0.760281 0.771117 875.0  
GSVT 0.777396 0.780551 0.774392 691.0  
SB 0.843476 0.834705 0.852437 1553.0  
SR 0.800888 0.819524 0.783154 907.0  
macro avg 0.796836 0.798765 0.795275 4026.0  
micro avg 0.805760 0.805760 0.805760 4026.0  
weighted avg 0.805611 0.805815 0.805760 4026.0

The result of Model Number:Dataset Number:Featuregroup Number:Rescale of 14 : 1 : 5 :  
0

f1-score precision recall support

AFIB 0.918337 0.925392 0.911599 204.0  
GSVT 0.950677 0.949765 0.951621 300.0  
SB 0.970126 0.967867 0.972406 892.0  
SR 0.961198 0.962494 0.959928 681.0  
macro avg 0.950085 0.951379 0.948888 2077.0  
micro avg 0.959340 0.959340 0.959340 2077.0  
weighted avg 0.959303 0.959319 0.959340 2077.0

The result of Model Number:Dataset Number:Featuregroup Number:Rescale of 14 : 1 : 5 :  
1

f1-score precision recall support

AFIB 0.819238 0.852304 0.788707 204.0  
GSVT 0.849724 0.835921 0.864138 300.0  
SB 0.871707 0.864699 0.878841 892.0  
SR 0.848255 0.854363 0.842278 681.0  
macro avg 0.847231 0.851822 0.843491 2077.0

micro avg 0.855876 0.855876 0.855876 2077.0  
weighted avg 0.855689 0.855936 0.855876 2077.0  
The result of Model Number:Dataset Number:Featuregroup Number:Rescale of 14 : 1 : 6 :  
0

|              | f1-score | precision | recall   | support |
|--------------|----------|-----------|----------|---------|
| AFIB         | 0.876884 | 0.881697  | 0.872180 | 875.0   |
| GSVT         | 0.878111 | 0.867009  | 0.889638 | 691.0   |
| SB           | 0.923485 | 0.919780  | 0.927229 | 1553.0  |
| SR           | 0.903661 | 0.914631  | 0.893007 | 907.0   |
| macro avg    | 0.895535 | 0.895779  | 0.895514 | 4026.0  |
| micro avg    | 0.901103 | 0.901103  | 0.901103 | 4026.0  |
| weighted avg | 0.901103 | 0.901286  | 0.901103 | 4026.0  |

The result of Model Number:Dataset Number:Featuregroup Number:Rescale of 14 : 1 : 6 :  
1

|              | f1-score | precision | recall   | support |
|--------------|----------|-----------|----------|---------|
| AFIB         | 0.779671 | 0.770236  | 0.789375 | 875.0   |
| GSVT         | 0.790225 | 0.798327  | 0.782347 | 691.0   |
| SB           | 0.839299 | 0.836568  | 0.842055 | 1553.0  |
| SR           | 0.820941 | 0.829377  | 0.812704 | 907.0   |
| macro avg    | 0.807534 | 0.808627  | 0.806620 | 4026.0  |
| micro avg    | 0.813745 | 0.813745  | 0.813745 | 4026.0  |
| weighted avg | 0.813781 | 0.813968  | 0.813745 | 4026.0  |

The result of Model Number:Dataset Number:Featuregroup Number:Rescale of 14 : 1 : 7 :  
0

|              | f1-score | precision | recall   | support |
|--------------|----------|-----------|----------|---------|
| AFIB         | 0.931179 | 0.949859  | 0.913404 | 204.0   |
| GSVT         | 0.952759 | 0.942856  | 0.962924 | 300.0   |
| SB           | 0.970380 | 0.966605  | 0.974187 | 892.0   |
| SR           | 0.960183 | 0.964190  | 0.956232 | 681.0   |
| macro avg    | 0.953625 | 0.955877  | 0.951687 | 2077.0  |
| micro avg    | 0.960703 | 0.960703  | 0.960703 | 2077.0  |
| weighted avg | 0.960641 | 0.960738  | 0.960703 | 2077.0  |

The result of Model Number:Dataset Number:Featuregroup Number:Rescale of 14 : 1 : 7 :  
1

|              | f1-score | precision | recall   | support |
|--------------|----------|-----------|----------|---------|
| AFIB         | 0.829891 | 0.839113  | 0.821296 | 204.0   |
| GSVT         | 0.855598 | 0.850727  | 0.860773 | 300.0   |
| SB           | 0.872619 | 0.871449  | 0.873792 | 892.0   |
| SR           | 0.865195 | 0.866354  | 0.864051 | 681.0   |
| macro avg    | 0.855826 | 0.856911  | 0.854978 | 2077.0  |
| micro avg    | 0.863562 | 0.863562  | 0.863562 | 2077.0  |
| weighted avg | 0.863530 | 0.863610  | 0.863562 | 2077.0  |

The result of Model Number:Dataset Number:Featuregroup Number:Rescale of 14 : 1 : 8 :  
0

f1-score precision recall support  
AFIB 0.695162 0.698473 0.691914 875.0  
GSVT 0.703750 0.690961 0.717094 691.0  
SB 0.744621 0.741769 0.747496 1553.0  
SR 0.722612 0.734980 0.710664 907.0  
macro avg 0.716536 0.716546 0.716792 4026.0  
micro avg 0.721900 0.721900 0.721900 4026.0  
weighted avg 0.721898 0.722109 0.721900 4026.0  
The result of Model Number:Dataset Number:Featuregroup Number:Rescale of 14 : 1 : 8 :  
1

f1-score precision recall support  
AFIB 0.820084 0.821006 0.819312 204.0  
GSVT 0.838912 0.837039 0.840857 300.0  
SB 0.856693 0.855549 0.857844 892.0  
SR 0.850277 0.852418 0.848157 681.0  
macro avg 0.841491 0.841503 0.841543 2077.0  
micro avg 0.848430 0.848430 0.848430 2077.0  
weighted avg 0.848425 0.848456 0.848430 2077.0  
The result of Model Number:Dataset Number:Featuregroup Number:Rescale of 14 : 1 : 9 :  
0

f1-score precision recall support  
AFIB 0.870505 0.892548 0.849606 204.0  
GSVT 0.889411 0.879739 0.899445 300.0  
SB 0.914462 0.909898 0.919075 892.0  
SR 0.900288 0.904327 0.896321 681.0  
macro avg 0.893667 0.896628 0.891112 2077.0  
micro avg 0.901956 0.901956 0.901956 2077.0  
weighted avg 0.901879 0.902011 0.901956 2077.0  
The result of Model Number:Dataset Number:Featuregroup Number:Rescale of 14 : 1 : 9 :  
1

f1-score precision recall support  
AFIB 0.669446 0.672180 0.666755 875.0  
GSVT 0.623383 0.650896 0.598205 691.0  
SB 0.669477 0.606459 0.747119 1553.0  
SR 0.505010 0.628532 0.422233 907.0  
macro avg 0.616829 0.639517 0.608578 4026.0  
micro avg 0.630902 0.630902 0.630902 4026.0  
weighted avg 0.624507 0.633342 0.630902 4026.0  
The result of Model Number:Dataset Number:Featuregroup Number:Rescale of 14 : 1 :  
10 : 0

f1-score precision recall support  
AFIB 0.874336 0.890376 0.858931 204.0  
GSVT 0.885867 0.876927 0.895009 300.0  
SB 0.907688 0.902963 0.912469 892.0

SR 0.895331 0.900941 0.889810 681.0  
macro avg 0.890805 0.892802 0.889055 2077.0  
micro avg 0.897259 0.897259 0.897259 2077.0  
weighted avg 0.897209 0.897303 0.897259 2077.0  
The result of Model Number:Dataset Number:Featuregroup Number:Rescale of 14 : 1 :  
10 : 1

f1-score precision recall support  
AFIB 0.762407 0.779648 0.745935 875.0  
GSVT 0.808325 0.811765 0.804962 691.0  
SB 0.877673 0.873537 0.881854 1553.0  
SR 0.831584 0.818828 0.844777 907.0  
macro avg 0.819997 0.820944 0.819382 4026.0  
micro avg 0.830764 0.830764 0.830764 4026.0  
weighted avg 0.830336 0.830204 0.830764 4026.0

The result of Model Number:Dataset Number:Featuregroup Number:Rescale of 15 : 0 : 0 :  
0

f1-score precision recall support  
AFIB 0.817327 0.807065 0.828090 875.0  
GSVT 0.758317 0.781277 0.739204 691.0  
SB 0.816449 0.756212 0.889272 1553.0  
SR 0.634815 0.776965 0.541320 907.0  
macro avg 0.756727 0.780380 0.749472 4026.0  
micro avg 0.771830 0.771830 0.771830 4026.0  
weighted avg 0.765743 0.776242 0.771830 4026.0

The result of Model Number:Dataset Number:Featuregroup Number:Rescale of 15 : 0 : 0 :  
1

f1-score precision recall support  
AFIB 0.654048 0.650135 0.658096 875.0  
GSVT 0.659404 0.662964 0.655977 691.0  
SB 0.698869 0.696826 0.700935 1553.0  
SR 0.683078 0.687984 0.678254 907.0  
macro avg 0.673850 0.674477 0.673316 4026.0  
micro avg 0.678799 0.678799 0.678799 4026.0  
weighted avg 0.678797 0.678875 0.678799 4026.0

The result of Model Number:Dataset Number:Featuregroup Number:Rescale of 15 : 0 : 1 :  
0

f1-score precision recall support  
AFIB 0.748882 0.743116 0.754795 875.0  
GSVT 0.758605 0.762127 0.755280 691.0  
SB 0.812951 0.808626 0.817339 1553.0  
SR 0.788999 0.800091 0.778296 907.0  
macro avg 0.777359 0.778490 0.776428 4026.0  
micro avg 0.784299 0.784299 0.784299 4026.0  
weighted avg 0.784302 0.784484 0.784299 4026.0

The result of Model Number:Dataset Number:Featuregroup Number:Rescale of 15 : 0 : 1 : 1

|              | f1-score | precision | recall   | support |
|--------------|----------|-----------|----------|---------|
| AFIB         | 0.915877 | 0.924226  | 0.907797 | 204.0   |
| GSVT         | 0.939778 | 0.936701  | 0.942905 | 300.0   |
| SB           | 0.956958 | 0.956320  | 0.957600 | 892.0   |
| SR           | 0.948542 | 0.948269  | 0.948828 | 681.0   |
| macro avg    | 0.940289 | 0.941379  | 0.939282 | 2077.0  |
| micro avg    | 0.947710 | 0.947710  | 0.947710 | 2077.0  |
| weighted avg | 0.947682 | 0.947694  | 0.947710 | 2077.0  |

The result of Model Number:Dataset Number:Featuregroup Number:Rescale of 15 : 0 : 2 : 0

|              | f1-score | precision | recall   | support |
|--------------|----------|-----------|----------|---------|
| AFIB         | 0.828953 | 0.846341  | 0.812288 | 204.0   |
| GSVT         | 0.848183 | 0.843164  | 0.853270 | 300.0   |
| SB           | 0.868861 | 0.866826  | 0.870906 | 892.0   |
| SR           | 0.861522 | 0.861274  | 0.861778 | 681.0   |
| macro avg    | 0.851880 | 0.854401  | 0.849560 | 2077.0  |
| micro avg    | 0.859608 | 0.859608  | 0.859608 | 2077.0  |
| weighted avg | 0.859548 | 0.859576  | 0.859608 | 2077.0  |

The result of Model Number:Dataset Number:Featuregroup Number:Rescale of 15 : 0 : 2 : 1

|              | f1-score | precision | recall   | support |
|--------------|----------|-----------|----------|---------|
| AFIB         | 0.928966 | 0.939829  | 0.918525 | 204.0   |
| GSVT         | 0.837932 | 0.805941  | 0.956069 | 300.0   |
| SB           | 0.777430 | 0.775598  | 0.779278 | 892.0   |
| SR           | 0.965305 | 0.967161  | 0.963464 | 681.0   |
| macro avg    | 0.877408 | 0.872132  | 0.904334 | 2077.0  |
| micro avg    | 0.878880 | 0.878880  | 0.878880 | 2077.0  |
| weighted avg | 0.862652 | 0.858920  | 0.878880 | 2077.0  |

The result of Model Number:Dataset Number:Featuregroup Number:Rescale of 15 : 0 : 3 : 0

|              | f1-score | precision | recall   | support |
|--------------|----------|-----------|----------|---------|
| AFIB         | 0.773137 | 0.779249  | 0.767146 | 875.0   |
| GSVT         | 0.792592 | 0.790916  | 0.794304 | 691.0   |
| SB           | 0.844926 | 0.837458  | 0.852539 | 1553.0  |
| SR           | 0.822433 | 0.830499  | 0.814542 | 907.0   |
| macro avg    | 0.808272 | 0.809531  | 0.807133 | 4026.0  |
| micro avg    | 0.815425 | 0.815425  | 0.815425 | 4026.0  |
| weighted avg | 0.815274 | 0.815251  | 0.815425 | 4026.0  |

The result of Model Number:Dataset Number:Featuregroup Number:Rescale of 15 : 0 : 3 : 1

|      | f1-score | precision | recall   | support |
|------|----------|-----------|----------|---------|
| AFIB | 0.676903 | 0.694624  | 0.660372 | 204.0   |



GSVT 0.636919 0.655430 0.619772 300.0  
SB 0.672086 0.648423 0.697553 892.0  
SR 0.609164 0.629002 0.590661 681.0  
macro avg 0.648768 0.656870 0.642090 2077.0  
micro avg 0.647619 0.647619 0.647619 2077.0  
weighted avg 0.646849 0.647605 0.647619 2077.0  
The result of Model Number:Dataset Number:Featuregroup Number:Rescale of 15 : 0 : 4 :  
0

f1-score precision recall support  
AFIB 0.827628 0.832348 0.823098 204.0  
GSVT 0.844657 0.838565 0.850847 300.0  
SB 0.861716 0.858568 0.864902 892.0  
SR 0.852551 0.858149 0.847047 681.0  
macro avg 0.846638 0.846907 0.846473 2077.0  
micro avg 0.852912 0.852912 0.852912 2077.0  
weighted avg 0.852899 0.852966 0.852912 2077.0  
The result of Model Number:Dataset Number:Featuregroup Number:Rescale of 15 : 0 : 4 :  
1

f1-score precision recall support  
AFIB 0.621066 0.676555 0.655859 204.0  
GSVT 0.843580 0.829790 0.858127 300.0  
SB 0.718147 0.712677 0.723755 892.0  
SR 0.878177 0.868240 0.888369 681.0  
macro avg 0.765242 0.771815 0.781528 2077.0  
micro avg 0.790468 0.790468 0.790468 2077.0  
weighted avg 0.779199 0.777050 0.790468 2077.0  
The result of Model Number:Dataset Number:Featuregroup Number:Rescale of 15 : 0 : 5 :  
0

f1-score precision recall support  
AFIB 0.857733 0.862239 0.853326 875.0  
GSVT 0.872208 0.873827 0.870706 691.0  
SB 0.923788 0.917228 0.930448 1553.0  
SR 0.906076 0.911659 0.900583 907.0  
macro avg 0.889951 0.891238 0.888765 4026.0  
micro avg 0.896704 0.896704 0.896704 4026.0  
weighted avg 0.896589 0.896573 0.896704 4026.0  
The result of Model Number:Dataset Number:Featuregroup Number:Rescale of 15 : 0 : 5 :  
1

f1-score precision recall support  
AFIB 0.617066 0.635779 0.599448 875.0  
GSVT 0.658726 0.654158 0.663394 691.0  
SB 0.720727 0.717970 0.723510 1553.0  
SR 0.681634 0.671403 0.692221 907.0  
macro avg 0.669538 0.669827 0.669643 4026.0

micro avg 0.679180 0.679180 0.679180 4026.0  
weighted avg 0.678749 0.678663 0.679180 4026.0  
The result of Model Number:Dataset Number:Featuregroup Number:Rescale of 15 : 0 : 6 :  
0

|              | f1-score | precision | recall   | support |
|--------------|----------|-----------|----------|---------|
| AFIB         | 0.765007 | 0.769574  | 0.760516 | 204.0   |
| GSVT         | 0.783804 | 0.780439  | 0.787200 | 300.0   |
| SB           | 0.797228 | 0.796073  | 0.798389 | 892.0   |
| SR           | 0.789939 | 0.791570  | 0.788317 | 681.0   |
| macro avg    | 0.783995 | 0.784414  | 0.783605 | 2077.0  |
| micro avg    | 0.789751 | 0.789751  | 0.789751 | 2077.0  |
| weighted avg | 0.789734 | 0.789736  | 0.789751 | 2077.0  |

The result of Model Number:Dataset Number:Featuregroup Number:Rescale of 15 : 0 : 6 :  
1

|              | f1-score | precision | recall   | support |
|--------------|----------|-----------|----------|---------|
| AFIB         | 0.590644 | 0.584263  | 0.672350 | 204.0   |
| GSVT         | 0.706668 | 0.701162  | 0.712322 | 300.0   |
| SB           | 0.576708 | 0.575502  | 0.577920 | 892.0   |
| SR           | 0.715131 | 0.714931  | 0.715341 | 681.0   |
| macro avg    | 0.647288 | 0.643965  | 0.669483 | 2077.0  |
| micro avg    | 0.651665 | 0.651665  | 0.651665 | 2077.0  |
| weighted avg | 0.642234 | 0.640228  | 0.651665 | 2077.0  |

The result of Model Number:Dataset Number:Featuregroup Number:Rescale of 15 : 0 : 7 :  
0

|              | f1-score | precision | recall   | support |
|--------------|----------|-----------|----------|---------|
| AFIB         | 0.847478 | 0.838114  | 0.857071 | 875.0   |
| GSVT         | 0.862748 | 0.868060  | 0.857515 | 691.0   |
| SB           | 0.918230 | 0.916701  | 0.919767 | 1553.0  |
| SR           | 0.895871 | 0.904248  | 0.887671 | 907.0   |
| macro avg    | 0.881082 | 0.881781  | 0.880506 | 4026.0  |
| micro avg    | 0.888225 | 0.888225  | 0.888225 | 4026.0  |
| weighted avg | 0.888293 | 0.888467  | 0.888225 | 4026.0  |

The result of Model Number:Dataset Number:Featuregroup Number:Rescale of 15 : 0 : 7 :  
1

|              | f1-score | precision | recall   | support |
|--------------|----------|-----------|----------|---------|
| AFIB         | 0.876604 | 0.883469  | 0.869891 | 875.0   |
| GSVT         | 0.878916 | 0.867699  | 0.890481 | 691.0   |
| SB           | 0.921884 | 0.918186  | 0.925621 | 1553.0  |
| SR           | 0.902407 | 0.911265  | 0.893753 | 907.0   |
| macro avg    | 0.894953 | 0.895155  | 0.894936 | 4026.0  |
| micro avg    | 0.900298 | 0.900298  | 0.900298 | 4026.0  |
| weighted avg | 0.900280 | 0.900416  | 0.900298 | 4026.0  |

The result of Model Number:Dataset Number:Featuregroup Number:Rescale of 15 : 0 : 8 :  
0

f1-score precision recall support  
AFIB 0.784236 0.766414 0.802960 875.0  
GSVT 0.811112 0.824266 0.798438 691.0  
SB 0.865368 0.865373 0.865369 1553.0  
SR 0.843220 0.852826 0.833830 907.0  
macro avg 0.825984 0.827220 0.825149 4026.0  
micro avg 0.833212 0.833212 0.833212 4026.0  
weighted avg 0.833433 0.833984 0.833212 4026.0  
The result of Model Number:Dataset Number:Featuregroup Number:Rescale of 15 : 0 : 8 :  
1

f1-score precision recall support  
AFIB 0.858167 0.866087 0.850438 875.0  
GSVT 0.878206 0.875835 0.880620 691.0  
SB 0.935302 0.926510 0.944271 1553.0  
SR 0.909460 0.918585 0.900532 907.0  
macro avg 0.895284 0.896754 0.893965 4026.0  
micro avg 0.903099 0.903099 0.903099 4026.0  
weighted avg 0.902916 0.902895 0.903099 4026.0  
The result of Model Number:Dataset Number:Featuregroup Number:Rescale of 15 : 0 : 9 :  
0

f1-score precision recall support  
AFIB 0.906411 0.929754 0.884248 204.0  
GSVT 0.831791 0.794764 0.938675 300.0  
SB 0.954304 0.952071 0.956549 892.0  
SR 0.757067 0.757209 0.756934 681.0  
macro avg 0.862393 0.858450 0.884102 2077.0  
micro avg 0.881417 0.881417 0.881417 2077.0  
weighted avg 0.867235 0.863267 0.881417 2077.0  
The result of Model Number:Dataset Number:Featuregroup Number:Rescale of 15 : 0 : 9 :  
1

f1-score precision recall support  
AFIB 0.889019 0.907743 0.871191 204.0  
GSVT 0.916659 0.908285 0.925211 300.0  
SB 0.931630 0.929553 0.933719 892.0  
SR 0.920558 0.921521 0.919608 681.0  
macro avg 0.914466 0.916775 0.912432 2077.0  
micro avg 0.921722 0.921722 0.921722 2077.0  
weighted avg 0.921652 0.921705 0.921722 2077.0  
The result of Model Number:Dataset Number:Featuregroup Number:Rescale of 15 : 0 :  
10 : 0

f1-score precision recall support  
AFIB 0.853270 0.864570 0.842391 204.0  
GSVT 0.879019 0.875847 0.882235 300.0  
SB 0.889968 0.887198 0.892759 892.0

SR 0.880271 0.881966 0.878606 681.0  
macro avg 0.875632 0.877395 0.873998 2077.0  
micro avg 0.881652 0.881652 0.881652 2077.0  
weighted avg 0.881603 0.881621 0.881652 2077.0  
The result of Model Number:Dataset Number:Featuregroup Number:Rescale of 15 : 0 :  
10 : 1

f1-score precision recall support  
AFIB 0.606245 0.602428 0.682894 204.0  
GSVT 0.739023 0.735222 0.742988 300.0  
SB 0.760065 0.756449 0.763725 892.0  
SR 0.596186 0.598150 0.594594 681.0  
macro avg 0.675380 0.673062 0.696050 2077.0  
micro avg 0.697336 0.697336 0.697336 2077.0  
weighted avg 0.688186 0.686353 0.697336 2077.0  
The result of Model Number:Dataset Number:Featuregroup Number:Rescale of 15 : 1 : 0 :  
0

f1-score precision recall support  
AFIB 0.861156 0.868975 0.853919 204.0  
GSVT 0.889618 0.884242 0.895293 300.0  
SB 0.908230 0.907013 0.909451 892.0  
SR 0.899826 0.901692 0.897974 681.0  
macro avg 0.889707 0.890480 0.889159 2077.0  
micro avg 0.898189 0.898189 0.898189 2077.0  
weighted avg 0.898163 0.898243 0.898189 2077.0  
The result of Model Number:Dataset Number:Featuregroup Number:Rescale of 15 : 1 : 0 :  
1

f1-score precision recall support  
AFIB 0.835965 0.845061 0.827306 204.0  
GSVT 0.864255 0.860651 0.868029 300.0  
SB 0.881965 0.881176 0.882756 892.0  
SR 0.873630 0.873638 0.873630 681.0  
macro avg 0.863954 0.865131 0.862930 2077.0  
micro avg 0.872191 0.872191 0.872191 2077.0  
weighted avg 0.872156 0.872193 0.872191 2077.0  
The result of Model Number:Dataset Number:Featuregroup Number:Rescale of 15 : 1 : 1 :  
0

f1-score precision recall support  
AFIB 0.889921 0.906275 0.874255 204.0  
GSVT 0.904869 0.898943 0.910898 300.0  
SB 0.920347 0.915854 0.924887 892.0  
SR 0.910834 0.914621 0.907092 681.0  
macro avg 0.906493 0.908923 0.904283 2077.0  
micro avg 0.912059 0.912059 0.912059 2077.0  
weighted avg 0.912004 0.912066 0.912059 2077.0

The result of Model Number:Dataset Number:Featuregroup Number:Rescale of 15 : 1 : 1 : 1

|              | f1-score | precision | recall   | support |
|--------------|----------|-----------|----------|---------|
| AFIB         | 0.808253 | 0.826548  | 0.790854 | 204.0   |
| GSVT         | 0.829762 | 0.825699  | 0.833901 | 300.0   |
| SB           | 0.846737 | 0.844292  | 0.849202 | 892.0   |
| SR           | 0.841297 | 0.840933  | 0.841673 | 681.0   |
| macro avg    | 0.831512 | 0.834368  | 0.828908 | 2077.0  |
| micro avg    | 0.838793 | 0.838793  | 0.838793 | 2077.0  |
| weighted avg | 0.838721 | 0.838762  | 0.838793 | 2077.0  |

The result of Model Number:Dataset Number:Featuregroup Number:Rescale of 15 : 1 : 2 : 0

|              | f1-score | precision | recall   | support |
|--------------|----------|-----------|----------|---------|
| AFIB         | 0.790016 | 0.781481  | 0.899301 | 204.0   |
| GSVT         | 0.945203 | 0.937838  | 0.952765 | 300.0   |
| SB           | 0.771376 | 0.769762  | 0.772997 | 892.0   |
| SR           | 0.956523 | 0.956255  | 0.956803 | 681.0   |
| macro avg    | 0.865779 | 0.861334  | 0.895467 | 2077.0  |
| micro avg    | 0.871634 | 0.871634  | 0.871634 | 2077.0  |
| weighted avg | 0.859019 | 0.856337  | 0.871634 | 2077.0  |

The result of Model Number:Dataset Number:Featuregroup Number:Rescale of 15 : 1 : 2 : 1

|              | f1-score | precision | recall   | support |
|--------------|----------|-----------|----------|---------|
| AFIB         | 0.721112 | 0.720307  | 0.721941 | 875.0   |
| GSVT         | 0.734303 | 0.725119  | 0.743744 | 691.0   |
| SB           | 0.771381 | 0.765180  | 0.777690 | 1553.0  |
| SR           | 0.736966 | 0.756302  | 0.718606 | 907.0   |
| macro avg    | 0.740941 | 0.741727  | 0.740495 | 4026.0  |
| micro avg    | 0.746437 | 0.746437  | 0.746437 | 4026.0  |
| weighted avg | 0.746339 | 0.746551  | 0.746437 | 4026.0  |

The result of Model Number:Dataset Number:Featuregroup Number:Rescale of 15 : 1 : 3 : 0

|              | f1-score | precision | recall   | support |
|--------------|----------|-----------|----------|---------|
| AFIB         | 0.824749 | 0.814238  | 0.835563 | 875.0   |
| GSVT         | 0.787485 | 0.792904  | 0.782161 | 691.0   |
| SB           | 0.833805 | 0.785623  | 0.888303 | 1553.0  |
| SR           | 0.679997 | 0.786738  | 0.598799 | 907.0   |
| macro avg    | 0.781509 | 0.794876  | 0.776206 | 4026.0  |
| micro avg    | 0.793402 | 0.793402  | 0.793402 | 4026.0  |
| weighted avg | 0.789236 | 0.793343  | 0.793402 | 4026.0  |

The result of Model Number:Dataset Number:Featuregroup Number:Rescale of 15 : 1 : 3 : 1

|      | f1-score | precision | recall   | support |
|------|----------|-----------|----------|---------|
| AFIB | 0.740228 | 0.728377  | 0.832907 | 204.0   |

GSVT 0.866612 0.856556 0.877222 300.0  
SB 0.895629 0.892247 0.899043 892.0  
SR 0.702727 0.706360 0.699250 681.0  
macro avg 0.801299 0.795885 0.827105 2077.0  
micro avg 0.823888 0.823888 0.823888 2077.0  
weighted avg 0.812926 0.810049 0.823888 2077.0  
The result of Model Number:Dataset Number:Featuregroup Number:Rescale of 15 : 1 : 4 :  
0

f1-score precision recall support  
AFIB 0.676711 0.670520 0.683048 875.0  
GSVT 0.685382 0.691430 0.679542 691.0  
SB 0.728539 0.724699 0.732432 1553.0  
SR 0.712070 0.720651 0.703756 907.0  
macro avg 0.700676 0.701825 0.699694 4026.0  
micro avg 0.706161 0.706161 0.706161 4026.0  
weighted avg 0.706158 0.706302 0.706161 4026.0  
The result of Model Number:Dataset Number:Featuregroup Number:Rescale of 15 : 1 : 4 :  
1

f1-score precision recall support  
AFIB 0.733628 0.764257 0.705492 875.0  
GSVT 0.792574 0.788562 0.796724 691.0  
SB 0.869082 0.864191 0.874052 1553.0  
SR 0.813764 0.795694 0.832688 907.0  
macro avg 0.802262 0.803176 0.802239 4026.0  
micro avg 0.814826 0.814826 0.814826 4026.0  
weighted avg 0.814049 0.814060 0.814826 4026.0  
The result of Model Number:Dataset Number:Featuregroup Number:Rescale of 15 : 1 : 5 :  
0

f1-score precision recall support  
AFIB 0.695844 0.725274 0.668941 204.0  
GSVT 0.640822 0.641944 0.649317 300.0  
SB 0.689904 0.657038 0.726901 892.0  
SR 0.609909 0.659033 0.568704 681.0  
macro avg 0.659120 0.670822 0.653466 2077.0  
micro avg 0.658133 0.658133 0.658133 2077.0  
weighted avg 0.657170 0.662214 0.658133 2077.0  
The result of Model Number:Dataset Number:Featuregroup Number:Rescale of 15 : 1 : 5 :  
1

f1-score precision recall support  
AFIB 0.868568 0.895416 0.844040 204.0  
GSVT 0.810797 0.828423 0.794503 300.0  
SB 0.855185 0.817231 0.896880 892.0  
SR 0.770001 0.809568 0.734230 681.0  
macro avg 0.826138 0.837659 0.817413 2077.0

micro avg 0.823574 0.823574 0.823574 2077.0  
weighted avg 0.822158 0.824014 0.823574 2077.0  
The result of Model Number:Dataset Number:Featuregroup Number:Rescale of 15 : 1 : 6 :  
0

|              | f1-score | precision | recall   | support |
|--------------|----------|-----------|----------|---------|
| AFIB         | 0.777382 | 0.855813  | 0.712575 | 204.0   |
| GSVT         | 0.916761 | 0.904106  | 0.929920 | 300.0   |
| SB           | 0.973422 | 0.970174  | 0.976696 | 892.0   |
| SR           | 0.948494 | 0.935371  | 0.962002 | 681.0   |
| macro avg    | 0.904015 | 0.916366  | 0.895298 | 2077.0  |
| micro avg    | 0.939180 | 0.939180  | 0.939180 | 2077.0  |
| weighted avg | 0.937810 | 0.937988  | 0.939180 | 2077.0  |

The result of Model Number:Dataset Number:Featuregroup Number:Rescale of 15 : 1 : 6 :  
1

|              | f1-score | precision | recall   | support |
|--------------|----------|-----------|----------|---------|
| AFIB         | 0.812231 | 0.813801  | 0.810729 | 875.0   |
| GSVT         | 0.786915 | 0.783458  | 0.790449 | 691.0   |
| SB           | 0.822233 | 0.772257  | 0.879146 | 1553.0  |
| SR           | 0.661782 | 0.766813  | 0.582215 | 907.0   |
| macro avg    | 0.770790 | 0.784082  | 0.765635 | 4026.0  |
| micro avg    | 0.782159 | 0.782159  | 0.782159 | 4026.0  |
| weighted avg | 0.777850 | 0.781982  | 0.782159 | 4026.0  |

The result of Model Number:Dataset Number:Featuregroup Number:Rescale of 15 : 1 : 7 :  
0

|              | f1-score | precision | recall   | support |
|--------------|----------|-----------|----------|---------|
| AFIB         | 0.786192 | 0.776876  | 0.795800 | 875.0   |
| GSVT         | 0.797382 | 0.805090  | 0.789898 | 691.0   |
| SB           | 0.846288 | 0.843050  | 0.849557 | 1553.0  |
| SR           | 0.826558 | 0.836094  | 0.817260 | 907.0   |
| macro avg    | 0.814105 | 0.815277  | 0.813129 | 4026.0  |
| micro avg    | 0.820358 | 0.820358  | 0.820358 | 4026.0  |
| weighted avg | 0.820388 | 0.820585  | 0.820358 | 4026.0  |

The result of Model Number:Dataset Number:Featuregroup Number:Rescale of 15 : 1 : 7 :  
1

|              | f1-score | precision | recall   | support |
|--------------|----------|-----------|----------|---------|
| AFIB         | 0.917155 | 0.925614  | 0.909070 | 204.0   |
| GSVT         | 0.950685 | 0.950719  | 0.950677 | 300.0   |
| SB           | 0.970595 | 0.968871  | 0.972334 | 892.0   |
| SR           | 0.960294 | 0.960037  | 0.960575 | 681.0   |
| macro avg    | 0.949682 | 0.951310  | 0.948164 | 2077.0  |
| micro avg    | 0.959137 | 0.959137  | 0.959137 | 2077.0  |
| weighted avg | 0.959093 | 0.959104  | 0.959137 | 2077.0  |

The result of Model Number:Dataset Number:Featuregroup Number:Rescale of 15 : 1 : 8 :  
0

f1-score precision recall support  
AFIB 0.722323 0.728623 0.716312 204.0  
GSVT 0.747303 0.746083 0.748546 300.0  
SB 0.763188 0.761326 0.765068 892.0  
SR 0.756191 0.757331 0.755080 681.0  
macro avg 0.747251 0.748341 0.746251 2077.0  
micro avg 0.754618 0.754618 0.754618 2077.0  
weighted avg 0.754586 0.754602 0.754618 2077.0  
The result of Model Number:Dataset Number:Featuregroup Number:Rescale of 15 : 1 : 8 :  
1

f1-score precision recall support  
AFIB 0.827951 0.829551 0.826420 875.0  
GSVT 0.802145 0.798621 0.805748 691.0  
SB 0.838146 0.787203 0.896161 1553.0  
SR 0.674590 0.781654 0.593483 907.0  
macro avg 0.785708 0.799257 0.780453 4026.0  
micro avg 0.797297 0.797297 0.797297 4026.0  
weighted avg 0.792904 0.797116 0.797297 4026.0  
The result of Model Number:Dataset Number:Featuregroup Number:Rescale of 15 : 1 : 9 :  
0

f1-score precision recall support  
AFIB 0.781891 0.810880 0.755015 204.0  
GSVT 0.805315 0.795246 0.815746 300.0  
SB 0.825737 0.818202 0.833418 892.0  
SR 0.804027 0.810267 0.797891 681.0  
macro avg 0.804243 0.808649 0.800517 2077.0  
micro avg 0.811516 0.811516 0.811516 2077.0  
weighted avg 0.811363 0.811565 0.811516 2077.0  
The result of Model Number:Dataset Number:Featuregroup Number:Rescale of 15 : 1 : 9 :  
1

f1-score precision recall support  
AFIB 0.678183 0.669287 0.687350 875.0  
GSVT 0.688566 0.696220 0.681091 691.0  
SB 0.730313 0.728589 0.732049 1553.0  
SR 0.712028 0.718437 0.705743 907.0  
macro avg 0.702273 0.703133 0.701558 4026.0  
micro avg 0.707662 0.707662 0.707662 4026.0  
weighted avg 0.707699 0.707858 0.707662 4026.0  
The result of Model Number:Dataset Number:Featuregroup Number:Rescale of 15 : 1 :  
10 : 0

f1-score precision recall support  
AFIB 0.147974 0.149528 0.146452 175.0  
GSVT 0.148212 0.146637 0.149821 138.2  
SB 0.156093 0.155495 0.156696 310.6



SR 0.152481 0.153245 0.151724 181.4  
macro avg 0.151190 0.151226 0.151173 805.2  
micro avg 0.152170 0.152170 0.152170 805.2  
weighted avg 0.152162 0.152171 0.152170 805.2  
The result of Model Number:Dataset Number:Featuregroup Number:Rescale of 15 : 1 :  
10 : 1

f1-score precision recall support  
AFIB 0.848539 0.854598 0.842717 204.0  
GSVT 0.878210 0.877643 0.878793 300.0  
SB 0.895781 0.893793 0.897786 892.0  
SR 0.887774 0.888848 0.886729 681.0  
macro avg 0.877576 0.878720 0.876507 2077.0  
micro avg 0.886009 0.886009 0.886009 2077.0  
weighted avg 0.885977 0.885989 0.886009 2077.0

The result of Model Number:Dataset Number:Featuregroup Number:Rescale of 16 : 0 : 0 :  
0

f1-score precision recall support  
AFIB 0.661756 0.663082 0.660463 875.0  
GSVT 0.663395 0.659813 0.667033 691.0  
SB 0.693470 0.689765 0.697220 1553.0  
SR 0.676880 0.684907 0.669058 907.0  
macro avg 0.673875 0.674392 0.673444 4026.0  
micro avg 0.677706 0.677706 0.677706 4026.0  
weighted avg 0.677678 0.677731 0.677706 4026.0

The result of Model Number:Dataset Number:Featuregroup Number:Rescale of 16 : 0 : 0 :  
1

f1-score precision recall support  
AFIB 0.817660 0.817778 0.817651 875.0  
GSVT 0.831941 0.825044 0.839015 691.0  
SB 0.871031 0.863496 0.878712 1553.0  
SR 0.842328 0.861357 0.824152 907.0  
macro avg 0.840740 0.841919 0.839882 4026.0  
micro avg 0.846336 0.846336 0.846336 4026.0  
weighted avg 0.846256 0.846478 0.846336 4026.0

The result of Model Number:Dataset Number:Featuregroup Number:Rescale of 16 : 0 : 1 :  
0

f1-score precision recall support  
AFIB 0.735402 0.757704 0.714406 875.0  
GSVT 0.785052 0.779607 0.790614 691.0  
SB 0.858942 0.855656 0.862259 1553.0  
SR 0.812352 0.800160 0.824970 907.0  
macro avg 0.797937 0.798282 0.798062 4026.0  
micro avg 0.809427 0.809427 0.809427 4026.0  
weighted avg 0.808914 0.808812 0.809427 4026.0

The result of Model Number:Dataset Number:Featuregroup Number:Rescale of 16 : 0 : 1 : 1

|              | f1-score | precision | recall   | support |
|--------------|----------|-----------|----------|---------|
| AFIB         | 0.855763 | 0.849174  | 0.862521 | 875.0   |
| GSVT         | 0.866874 | 0.870898  | 0.863075 | 691.0   |
| SB           | 0.928976 | 0.924034  | 0.933991 | 1553.0  |
| SR           | 0.901605 | 0.914281  | 0.889375 | 907.0   |
| macro avg    | 0.888304 | 0.889597  | 0.887240 | 4026.0  |
| micro avg    | 0.896235 | 0.896235  | 0.896235 | 4026.0  |
| weighted avg | 0.896239 | 0.896447  | 0.896235 | 4026.0  |

The result of Model Number:Dataset Number:Featuregroup Number:Rescale of 16 : 0 : 2 : 0

|              | f1-score | precision | recall   | support |
|--------------|----------|-----------|----------|---------|
| AFIB         | 0.830076 | 0.865652  | 0.797624 | 204.0   |
| GSVT         | 0.857969 | 0.845006  | 0.871391 | 300.0   |
| SB           | 0.874987 | 0.866333  | 0.883817 | 892.0   |
| SR           | 0.851281 | 0.858564  | 0.844152 | 681.0   |
| macro avg    | 0.853578 | 0.858889  | 0.849246 | 2077.0  |
| micro avg    | 0.860551 | 0.860551  | 0.860551 | 2077.0  |
| weighted avg | 0.860345 | 0.860638  | 0.860551 | 2077.0  |

The result of Model Number:Dataset Number:Featuregroup Number:Rescale of 16 : 0 : 2 : 1

|              | f1-score | precision | recall   | support |
|--------------|----------|-----------|----------|---------|
| AFIB         | 0.838200 | 0.854260  | 0.822945 | 204.0   |
| GSVT         | 0.864854 | 0.860399  | 0.869436 | 300.0   |
| SB           | 0.886243 | 0.884862  | 0.887634 | 892.0   |
| SR           | 0.877510 | 0.876638  | 0.878411 | 681.0   |
| macro avg    | 0.866701 | 0.869040  | 0.864606 | 2077.0  |
| micro avg    | 0.875628 | 0.875628  | 0.875628 | 2077.0  |
| weighted avg | 0.875571 | 0.875627  | 0.875628 | 2077.0  |

The result of Model Number:Dataset Number:Featuregroup Number:Rescale of 16 : 0 : 3 : 0

|              | f1-score | precision | recall   | support |
|--------------|----------|-----------|----------|---------|
| AFIB         | 0.772907 | 0.784758  | 0.761536 | 204.0   |
| GSVT         | 0.791234 | 0.784521  | 0.798096 | 300.0   |
| SB           | 0.804997 | 0.802400  | 0.807615 | 892.0   |
| SR           | 0.796726 | 0.799683  | 0.793800 | 681.0   |
| macro avg    | 0.791466 | 0.792840  | 0.790261 | 2077.0  |
| micro avg    | 0.797184 | 0.797184  | 0.797184 | 2077.0  |
| weighted avg | 0.797145 | 0.797194  | 0.797184 | 2077.0  |

The result of Model Number:Dataset Number:Featuregroup Number:Rescale of 16 : 0 : 3 : 1

|      | f1-score | precision | recall   | support |
|------|----------|-----------|----------|---------|
| AFIB | 0.835896 | 0.851231  | 0.821168 | 204.0   |

GSVT 0.846921 0.838374 0.855661 300.0  
SB 0.867782 0.863265 0.872353 892.0  
SR 0.855968 0.861332 0.850690 681.0  
macro avg 0.851642 0.853550 0.849968 2077.0  
micro avg 0.857812 0.857812 0.857812 2077.0  
weighted avg 0.857764 0.857854 0.857812 2077.0  
The result of Model Number:Dataset Number:Featuregroup Number:Rescale of 16 : 0 : 4 :  
0

f1-score precision recall support  
AFIB 0.828775 0.845694 0.812887 204.0  
GSVT 0.858869 0.851408 0.866620 300.0  
SB 0.875382 0.873820 0.876953 892.0  
SR 0.867234 0.867752 0.866723 681.0  
macro avg 0.857565 0.859668 0.855796 2077.0  
micro avg 0.865814 0.865814 0.865814 2077.0  
weighted avg 0.865748 0.865830 0.865814 2077.0  
The result of Model Number:Dataset Number:Featuregroup Number:Rescale of 16 : 0 : 4 :  
1

f1-score precision recall support  
AFIB 0.650960 0.652770 0.649193 875.0  
GSVT 0.665871 0.665686 0.666062 691.0  
SB 0.709174 0.702508 0.715975 1553.0  
SR 0.690383 0.700339 0.680714 907.0  
macro avg 0.679097 0.680326 0.677986 4026.0  
micro avg 0.684950 0.684950 0.684950 4026.0  
weighted avg 0.684856 0.684890 0.684950 4026.0  
The result of Model Number:Dataset Number:Featuregroup Number:Rescale of 16 : 0 : 5 :  
0

f1-score precision recall support  
AFIB 0.685307 0.695416 0.675562 204.0  
GSVT 0.702130 0.699375 0.704931 300.0  
SB 0.717724 0.716285 0.719172 892.0  
SR 0.712633 0.712741 0.712533 681.0  
macro avg 0.704449 0.705954 0.703050 2077.0  
micro avg 0.710655 0.710655 0.710655 2077.0  
weighted avg 0.710619 0.710631 0.710655 2077.0  
The result of Model Number:Dataset Number:Featuregroup Number:Rescale of 16 : 0 : 5 :  
1

f1-score precision recall support  
AFIB 0.722624 0.705782 0.740406 875.0  
GSVT 0.693693 0.701318 0.686279 691.0  
SB 0.730001 0.682862 0.784148 1553.0  
SR 0.584252 0.701574 0.500859 907.0  
macro avg 0.682643 0.697884 0.677923 4026.0

micro avg 0.694023 0.694023 0.694023 4026.0  
weighted avg 0.689331 0.695227 0.694023 4026.0  
The result of Model Number:Dataset Number:Featuregroup Number:Rescale of 16 : 0 : 6 :  
0

|              | f1-score | precision | recall   | support |
|--------------|----------|-----------|----------|---------|
| AFIB         | 0.807885 | 0.810833  | 0.805012 | 875.0   |
| GSVT         | 0.821849 | 0.811147  | 0.832907 | 691.0   |
| SB           | 0.866311 | 0.856770  | 0.876073 | 1553.0  |
| SR           | 0.821015 | 0.843695  | 0.799567 | 907.0   |
| macro avg    | 0.829265 | 0.830611  | 0.828390 | 4026.0  |
| micro avg    | 0.835984 | 0.835984  | 0.835984 | 4026.0  |
| weighted avg | 0.835777 | 0.836010  | 0.835984 | 4026.0  |

The result of Model Number:Dataset Number:Featuregroup Number:Rescale of 16 : 0 : 6 :  
1

|              | f1-score | precision | recall   | support |
|--------------|----------|-----------|----------|---------|
| AFIB         | 0.849293 | 0.850441  | 0.848309 | 875.0   |
| GSVT         | 0.862520 | 0.862077  | 0.862996 | 691.0   |
| SB           | 0.900813 | 0.897590  | 0.904063 | 1553.0  |
| SR           | 0.879242 | 0.884170  | 0.874425 | 907.0   |
| macro avg    | 0.872967 | 0.873570  | 0.872448 | 4026.0  |
| micro avg    | 0.878220 | 0.878220  | 0.878220 | 4026.0  |
| weighted avg | 0.878184 | 0.878224  | 0.878220 | 4026.0  |

The result of Model Number:Dataset Number:Featuregroup Number:Rescale of 16 : 0 : 7 :  
0

|              | f1-score | precision | recall   | support |
|--------------|----------|-----------|----------|---------|
| AFIB         | 0.890629 | 0.889196  | 0.892430 | 875.0   |
| GSVT         | 0.911394 | 0.906643  | 0.916248 | 691.0   |
| SB           | 0.952910 | 0.944837  | 0.961130 | 1553.0  |
| SR           | 0.916534 | 0.936910  | 0.897334 | 907.0   |
| macro avg    | 0.917867 | 0.919396  | 0.916785 | 4026.0  |
| micro avg    | 0.924123 | 0.924123  | 0.924123 | 4026.0  |
| weighted avg | 0.924053 | 0.924403  | 0.924123 | 4026.0  |

The result of Model Number:Dataset Number:Featuregroup Number:Rescale of 16 : 0 : 7 :  
1

|              | f1-score | precision | recall   | support |
|--------------|----------|-----------|----------|---------|
| AFIB         | 0.605632 | 0.590134  | 0.622022 | 875.0   |
| GSVT         | 0.572509 | 0.604957  | 0.543498 | 691.0   |
| SB           | 0.607060 | 0.558641  | 0.664684 | 1553.0  |
| SR           | 0.484939 | 0.589021  | 0.412203 | 907.0   |
| macro avg    | 0.567535 | 0.585688  | 0.560602 | 4026.0  |
| micro avg    | 0.577732 | 0.577732  | 0.577732 | 4026.0  |
| weighted avg | 0.573307 | 0.580279  | 0.577732 | 4026.0  |

The result of Model Number:Dataset Number:Featuregroup Number:Rescale of 16 : 0 : 8 :  
0

f1-score precision recall support

|              |          |          |          |        |
|--------------|----------|----------|----------|--------|
| AFIB         | 0.776688 | 0.779859 | 0.773566 | 875.0  |
| GSVT         | 0.723246 | 0.755166 | 0.694034 | 691.0  |
| SB           | 0.776723 | 0.703611 | 0.866803 | 1553.0 |
| SR           | 0.585909 | 0.729219 | 0.489873 | 907.0  |
| macro avg    | 0.715642 | 0.741964 | 0.706069 | 4026.0 |
| micro avg    | 0.731969 | 0.731969 | 0.731969 | 4026.0 |
| weighted avg | 0.724549 | 0.734800 | 0.731969 | 4026.0 |

The result of Model Number:Dataset Number:Featuregroup Number:Rescale of 16 : 0 : 8 : 1

f1-score precision recall support

|              |          |          |          |        |
|--------------|----------|----------|----------|--------|
| AFIB         | 0.699980 | 0.703449 | 0.696620 | 875.0  |
| GSVT         | 0.706950 | 0.707969 | 0.706041 | 691.0  |
| SB           | 0.744160 | 0.740708 | 0.747653 | 1553.0 |
| SR           | 0.730461 | 0.732291 | 0.728681 | 907.0  |
| macro avg    | 0.720388 | 0.721104 | 0.719749 | 4026.0 |
| micro avg    | 0.725146 | 0.725146 | 0.725146 | 4026.0 |
| weighted avg | 0.725086 | 0.725095 | 0.725146 | 4026.0 |

The result of Model Number:Dataset Number:Featuregroup Number:Rescale of 16 : 0 : 9 : 0

f1-score precision recall support

|              |          |          |          |        |
|--------------|----------|----------|----------|--------|
| AFIB         | 0.700247 | 0.722692 | 0.679363 | 204.0  |
| GSVT         | 0.721196 | 0.708788 | 0.734152 | 300.0  |
| SB           | 0.733672 | 0.726419 | 0.741073 | 892.0  |
| SR           | 0.714055 | 0.722990 | 0.705353 | 681.0  |
| macro avg    | 0.717292 | 0.720222 | 0.714985 | 2077.0 |
| micro avg    | 0.722300 | 0.722300 | 0.722300 | 2077.0 |
| weighted avg | 0.722155 | 0.722382 | 0.722300 | 2077.0 |

The result of Model Number:Dataset Number:Featuregroup Number:Rescale of 16 : 0 : 9 : 1

f1-score precision recall support

|              |          |          |          |        |
|--------------|----------|----------|----------|--------|
| AFIB         | 0.867674 | 0.874264 | 0.861256 | 204.0  |
| GSVT         | 0.885437 | 0.876789 | 0.894277 | 300.0  |
| SB           | 0.906091 | 0.903775 | 0.908427 | 892.0  |
| SR           | 0.896480 | 0.901544 | 0.891483 | 681.0  |
| macro avg    | 0.888920 | 0.889093 | 0.888861 | 2077.0 |
| micro avg    | 0.896195 | 0.896195 | 0.896195 | 2077.0 |
| weighted avg | 0.896183 | 0.896247 | 0.896195 | 2077.0 |

The result of Model Number:Dataset Number:Featuregroup Number:Rescale of 16 : 0 : 10 : 0

f1-score precision recall support

|      |          |          |          |        |
|------|----------|----------|----------|--------|
| AFIB | 0.764693 | 0.755674 | 0.773961 | 875.0  |
| GSVT | 0.779719 | 0.786501 | 0.773061 | 691.0  |
| SB   | 0.830988 | 0.827808 | 0.834197 | 1553.0 |

SR 0.811381 0.821191 0.801812 907.0  
macro avg 0.796695 0.797793 0.795758 4026.0  
micro avg 0.803316 0.803316 0.803316 4026.0  
weighted avg 0.803363 0.803550 0.803316 4026.0  
The result of Model Number:Dataset Number:Featuregroup Number:Rescale of 16 : 0 :  
10 : 1

f1-score precision recall support  
AFIB 0.828772 0.830876 0.826709 875.0  
GSVT 0.843397 0.834261 0.852770 691.0  
SB 0.888894 0.878839 0.899196 1553.0  
SR 0.848252 0.871475 0.826269 907.0  
macro avg 0.852329 0.853863 0.851236 4026.0  
micro avg 0.859044 0.859044 0.859044 4026.0  
weighted avg 0.858862 0.859105 0.859044 4026.0  
The result of Model Number:Dataset Number:Featuregroup Number:Rescale of 16 : 1 : 0 :  
0

f1-score precision recall support  
AFIB 0.765216 0.760398 0.861963 204.0  
GSVT 0.932811 0.928013 0.937816 300.0  
SB 0.959371 0.954807 0.963990 892.0  
SR 0.752519 0.754998 0.750509 681.0  
macro avg 0.852479 0.849554 0.878570 2077.0  
micro avg 0.880193 0.880193 0.880193 2077.0  
weighted avg 0.868643 0.866330 0.880193 2077.0  
The result of Model Number:Dataset Number:Featuregroup Number:Rescale of 16 : 1 : 0 :  
1

f1-score precision recall support  
AFIB 0.747896 0.750470 0.745435 875.0  
GSVT 0.762095 0.746890 0.778069 691.0  
SB 0.806738 0.802376 0.811153 1553.0  
SR 0.775535 0.793567 0.758351 907.0  
macro avg 0.773066 0.773326 0.773252 4026.0  
micro avg 0.779296 0.779296 0.779296 4026.0  
weighted avg 0.779258 0.779587 0.779296 4026.0  
The result of Model Number:Dataset Number:Featuregroup Number:Rescale of 16 : 1 : 1 :  
0

f1-score precision recall support  
AFIB 0.775519 0.763103 0.872616 204.0  
GSVT 0.907928 0.897393 0.919045 300.0  
SB 0.938329 0.934786 0.941905 892.0  
SR 0.736230 0.740037 0.732587 681.0  
macro avg 0.839502 0.833830 0.866538 2077.0  
micro avg 0.863167 0.863167 0.863167 2077.0  
weighted avg 0.851683 0.848669 0.863167 2077.0

The result of Model Number:Dataset Number:Featuregroup Number:Rescale of 16 : 1 : 1 : 1

|              | f1-score | precision | recall   | support |
|--------------|----------|-----------|----------|---------|
| AFIB         | 0.698534 | 0.710147  | 0.687455 | 204.0   |
| GSVT         | 0.711928 | 0.706870  | 0.717112 | 300.0   |
| SB           | 0.728441 | 0.724347  | 0.732598 | 892.0   |
| SR           | 0.719161 | 0.723561  | 0.714837 | 681.0   |
| macro avg    | 0.714516 | 0.716231  | 0.713001 | 2077.0  |
| micro avg    | 0.720104 | 0.720104  | 0.720104 | 2077.0  |
| weighted avg | 0.720076 | 0.720170  | 0.720104 | 2077.0  |

The result of Model Number:Dataset Number:Featuregroup Number:Rescale of 16 : 1 : 2 : 0

|              | f1-score | precision | recall   | support |
|--------------|----------|-----------|----------|---------|
| AFIB         | 0.790629 | 0.768700  | 0.816334 | 875.0   |
| GSVT         | 0.800950 | 0.834687  | 0.774763 | 691.0   |
| SB           | 0.879872 | 0.879427  | 0.880328 | 1553.0  |
| SR           | 0.857798 | 0.863166  | 0.852502 | 907.0   |
| macro avg    | 0.832312 | 0.836495  | 0.830982 | 4026.0  |
| micro avg    | 0.842032 | 0.842032  | 0.842032 | 4026.0  |
| weighted avg | 0.841957 | 0.844020  | 0.842032 | 4026.0  |

The result of Model Number:Dataset Number:Featuregroup Number:Rescale of 16 : 1 : 2 : 1

|              | f1-score | precision | recall   | support |
|--------------|----------|-----------|----------|---------|
| AFIB         | 0.870306 | 0.861552  | 0.879264 | 875.0   |
| GSVT         | 0.878094 | 0.885912  | 0.870477 | 691.0   |
| SB           | 0.928985 | 0.926134  | 0.931855 | 1553.0  |
| SR           | 0.910995 | 0.918969  | 0.903162 | 907.0   |
| macro avg    | 0.897095 | 0.898142  | 0.896189 | 4026.0  |
| micro avg    | 0.903426 | 0.903426  | 0.903426 | 4026.0  |
| weighted avg | 0.903444 | 0.903580  | 0.903426 | 4026.0  |

The result of Model Number:Dataset Number:Featuregroup Number:Rescale of 16 : 1 : 3 : 0

|              | f1-score | precision | recall   | support |
|--------------|----------|-----------|----------|---------|
| AFIB         | 0.914115 | 0.923019  | 0.905604 | 204.0   |
| GSVT         | 0.935254 | 0.930960  | 0.939620 | 300.0   |
| SB           | 0.948178 | 0.944916  | 0.951470 | 892.0   |
| SR           | 0.940171 | 0.943819  | 0.936596 | 681.0   |
| macro avg    | 0.934430 | 0.935678  | 0.933323 | 2077.0  |
| micro avg    | 0.940377 | 0.940377  | 0.940377 | 2077.0  |
| weighted avg | 0.940341 | 0.940390  | 0.940377 | 2077.0  |

The result of Model Number:Dataset Number:Featuregroup Number:Rescale of 16 : 1 : 3 : 1

|      | f1-score | precision | recall   | support |
|------|----------|-----------|----------|---------|
| AFIB | 0.739758 | 0.819664  | 0.674184 | 204.0   |

GSVT 0.857538 0.843591 0.872089 300.0  
SB 0.914511 0.910348 0.918714 892.0  
SR 0.892415 0.881058 0.904080 681.0  
macro avg 0.851056 0.863665 0.842267 2077.0  
micro avg 0.883164 0.883164 0.883164 2077.0  
weighted avg 0.881873 0.882195 0.883164 2077.0  
The result of Model Number:Dataset Number:Featuregroup Number:Rescale of 16 : 1 : 4 :  
0

f1-score precision recall support  
AFIB 0.888444 0.903870 0.873649 204.0  
GSVT 0.905952 0.903271 0.908667 300.0  
SB 0.916635 0.913373 0.919923 892.0  
SR 0.909182 0.910131 0.908255 681.0  
macro avg 0.905053 0.907661 0.902623 2077.0  
micro avg 0.909926 0.909926 0.909926 2077.0  
weighted avg 0.909879 0.909918 0.909926 2077.0  
The result of Model Number:Dataset Number:Featuregroup Number:Rescale of 16 : 1 : 4 :  
1

f1-score precision recall support  
AFIB 0.603027 0.585653 0.661637 875.0  
GSVT 0.664617 0.662494 0.666839 691.0  
SB 0.561034 0.552766 0.569599 1553.0  
SR 0.671771 0.684883 0.659236 907.0  
macro avg 0.625112 0.621449 0.639328 4026.0  
micro avg 0.626486 0.626486 0.626486 4026.0  
weighted avg 0.612887 0.608511 0.626486 4026.0  
The result of Model Number:Dataset Number:Featuregroup Number:Rescale of 16 : 1 : 5 :  
0

f1-score precision recall support  
AFIB 0.742258 0.760741 0.724687 875.0  
GSVT 0.784249 0.787578 0.780980 691.0  
SB 0.850660 0.847405 0.853945 1553.0  
SR 0.809165 0.794086 0.824870 907.0  
macro avg 0.796583 0.797453 0.796120 4026.0  
micro avg 0.806779 0.806779 0.806779 4026.0  
weighted avg 0.806353 0.806289 0.806779 4026.0  
The result of Model Number:Dataset Number:Featuregroup Number:Rescale of 16 : 1 : 5 :  
1

f1-score precision recall support  
AFIB 0.631390 0.616675 0.646927 875.0  
GSVT 0.606112 0.612775 0.599634 691.0  
SB 0.637836 0.596648 0.685146 1553.0  
SR 0.510488 0.612998 0.437624 907.0  
macro avg 0.596457 0.609774 0.592333 4026.0



micro avg 0.606400 0.606400 0.606400 4026.0  
weighted avg 0.602301 0.607452 0.606400 4026.0  
The result of Model Number:Dataset Number:Featuregroup Number:Rescale of 16 : 1 : 6 :  
0

|              | f1-score | precision | recall   | support |
|--------------|----------|-----------|----------|---------|
| AFIB         | 0.822047 | 0.814128  | 0.830249 | 875.0   |
| GSVT         | 0.843585 | 0.845998  | 0.841273 | 691.0   |
| SB           | 0.896876 | 0.894813  | 0.898954 | 1553.0  |
| SR           | 0.871647 | 0.881903  | 0.861645 | 907.0   |
| macro avg    | 0.858539 | 0.859211  | 0.858030 | 4026.0  |
| micro avg    | 0.865717 | 0.865717  | 0.865717 | 4026.0  |
| weighted avg | 0.865782 | 0.865990  | 0.865717 | 4026.0  |

The result of Model Number:Dataset Number:Featuregroup Number:Rescale of 16 : 1 : 6 :  
1

|              | f1-score | precision | recall   | support |
|--------------|----------|-----------|----------|---------|
| AFIB         | 0.880184 | 0.885015  | 0.875462 | 875.0   |
| GSVT         | 0.881415 | 0.870271  | 0.892986 | 691.0   |
| SB           | 0.926960 | 0.923241  | 0.930718 | 1553.0  |
| SR           | 0.907061 | 0.918073  | 0.896368 | 907.0   |
| macro avg    | 0.898905 | 0.899150  | 0.898883 | 4026.0  |
| micro avg    | 0.904494 | 0.904494  | 0.904494 | 4026.0  |
| weighted avg | 0.904494 | 0.904677  | 0.904494 | 4026.0  |

The result of Model Number:Dataset Number:Featuregroup Number:Rescale of 16 : 1 : 7 :  
0

|              | f1-score | precision | recall   | support |
|--------------|----------|-----------|----------|---------|
| AFIB         | 0.859586 | 0.860197  | 0.858993 | 875.0   |
| GSVT         | 0.871169 | 0.872887  | 0.869533 | 691.0   |
| SB           | 0.925328 | 0.922253  | 0.928426 | 1553.0  |
| SR           | 0.903585 | 0.906944  | 0.900281 | 907.0   |
| macro avg    | 0.889917 | 0.890570  | 0.889308 | 4026.0  |
| micro avg    | 0.896887 | 0.896887  | 0.896887 | 4026.0  |
| weighted avg | 0.896846 | 0.896844  | 0.896887 | 4026.0  |

The result of Model Number:Dataset Number:Featuregroup Number:Rescale of 16 : 1 : 7 :  
1

|              | f1-score | precision | recall   | support |
|--------------|----------|-----------|----------|---------|
| AFIB         | 0.901755 | 0.948342  | 0.859799 | 204.0   |
| GSVT         | 0.945567 | 0.936325  | 0.955015 | 300.0   |
| SB           | 0.962240 | 0.954499  | 0.970113 | 892.0   |
| SR           | 0.950354 | 0.951511  | 0.949239 | 681.0   |
| macro avg    | 0.939979 | 0.947669  | 0.933541 | 2077.0  |
| micro avg    | 0.950253 | 0.950253  | 0.950253 | 2077.0  |
| weighted avg | 0.949994 | 0.950289  | 0.950253 | 2077.0  |

The result of Model Number:Dataset Number:Featuregroup Number:Rescale of 16 : 1 : 8 :  
0

f1-score precision recall support  
AFIB 0.827200 0.839741 0.815048 204.0  
GSVT 0.840501 0.833415 0.847752 300.0  
SB 0.859144 0.856373 0.861936 892.0  
SR 0.849922 0.853079 0.846811 681.0  
macro avg 0.844191 0.845652 0.842887 2077.0  
micro avg 0.850323 0.850323 0.850323 2077.0  
weighted avg 0.850290 0.850343 0.850323 2077.0  
The result of Model Number:Dataset Number:Featuregroup Number:Rescale of 16 : 1 : 8 :  
1

f1-score precision recall support  
AFIB 0.869911 0.902026 0.840084 204.0  
GSVT 0.888504 0.879385 0.897952 300.0  
SB 0.912839 0.908582 0.917137 892.0  
SR 0.898606 0.899169 0.898073 681.0  
macro avg 0.892465 0.897291 0.888311 2077.0  
micro avg 0.900547 0.900547 0.900547 2077.0  
weighted avg 0.900441 0.900635 0.900547 2077.0  
The result of Model Number:Dataset Number:Featuregroup Number:Rescale of 16 : 1 : 9 :  
0

f1-score precision recall support  
AFIB 0.817032 0.807395 0.826943 875.0  
GSVT 0.830872 0.836130 0.825711 691.0  
SB 0.885870 0.884679 0.887068 1553.0  
SR 0.864107 0.872293 0.856102 907.0  
macro avg 0.849470 0.850124 0.848956 4026.0  
micro avg 0.856493 0.856493 0.856493 4026.0  
weighted avg 0.856567 0.856759 0.856493 4026.0  
The result of Model Number:Dataset Number:Featuregroup Number:Rescale of 16 : 1 : 9 :  
1

f1-score precision recall support  
AFIB 0.801020 0.807701 0.794725 204.0  
GSVT 0.822181 0.818395 0.826019 300.0  
SB 0.834580 0.831615 0.837571 892.0  
SR 0.826872 0.830575 0.823244 681.0  
macro avg 0.821163 0.822072 0.820390 2077.0  
micro avg 0.826997 0.826997 0.826997 2077.0  
weighted avg 0.826966 0.827016 0.826997 2077.0  
The result of Model Number:Dataset Number:Featuregroup Number:Rescale of 16 : 1 :  
10 : 0

f1-score precision recall support  
AFIB 0.926387 0.943412 0.910080 204.0  
GSVT 0.941948 0.935779 0.948224 300.0  
SB 0.958060 0.953383 0.962786 892.0

SR 0.948158 0.952100 0.944262 681.0  
macro avg 0.943638 0.946168 0.941338 2077.0  
micro avg 0.949432 0.949432 0.949432 2077.0  
weighted avg 0.949375 0.949440 0.949432 2077.0  
The result of Model Number:Dataset Number:Featuregroup Number:Rescale of 16 : 1 :

10 : 1

f1-score precision recall support

AFIB 0.669701 0.659433 0.680406 875.0  
GSVT 0.692793 0.699584 0.686270 691.0  
SB 0.737317 0.735595 0.739071 1553.0  
SR 0.718899 0.728014 0.710024 907.0  
macro avg 0.704678 0.705656 0.703943 4026.0  
micro avg 0.710715 0.710715 0.710715 4026.0  
weighted avg 0.710830 0.711153 0.710715 4026.0

The result of Model Number:Dataset Number:Featuregroup Number:Rescale of 17 : 0 : 0 :  
0

f1-score precision recall support

AFIB 0.847261 0.857168 0.837738 204.0  
GSVT 0.764233 0.735056 0.871979 300.0  
SB 0.709052 0.707381 0.710738 892.0  
SR 0.880404 0.882096 0.878725 681.0  
macro avg 0.800238 0.795425 0.824795 2077.0  
micro avg 0.801580 0.801580 0.801580 2077.0  
weighted avg 0.786779 0.783375 0.801580 2077.0

The result of Model Number:Dataset Number:Featuregroup Number:Rescale of 17 : 0 : 0 :  
1

f1-score precision recall support

AFIB 0.672709 0.661939 0.756934 204.0  
GSVT 0.787565 0.778426 0.797208 300.0  
SB 0.813935 0.810862 0.817038 892.0  
SR 0.638628 0.641930 0.635469 681.0  
macro avg 0.728210 0.723290 0.751662 2077.0  
micro avg 0.748738 0.748738 0.748738 2077.0  
weighted avg 0.738776 0.736161 0.748738 2077.0

The result of Model Number:Dataset Number:Featuregroup Number:Rescale of 17 : 0 : 1 :  
0

f1-score precision recall support

AFIB 0.694686 0.709258 0.680720 204.0  
GSVT 0.710802 0.706596 0.715065 300.0  
SB 0.728130 0.726425 0.729844 892.0  
SR 0.721980 0.721772 0.722194 681.0  
macro avg 0.713899 0.716013 0.711956 2077.0  
micro avg 0.720376 0.720376 0.720376 2077.0  
weighted avg 0.720326 0.720349 0.720376 2077.0

The result of Model Number:Dataset Number:Featuregroup Number:Rescale of 17 : 0 : 1 : 1

|              | f1-score | precision | recall   | support |
|--------------|----------|-----------|----------|---------|
| AFIB         | 0.897802 | 0.946641  | 0.853985 | 204.0   |
| GSVT         | 0.942527 | 0.928272  | 0.957264 | 300.0   |
| SB           | 0.964925 | 0.958648  | 0.971299 | 892.0   |
| SR           | 0.953020 | 0.953879  | 0.952185 | 681.0   |
| macro avg    | 0.939568 | 0.946860  | 0.933683 | 2077.0  |
| micro avg    | 0.951482 | 0.951482  | 0.951482 | 2077.0  |
| weighted avg | 0.951194 | 0.951517  | 0.951482 | 2077.0  |

The result of Model Number:Dataset Number:Featuregroup Number:Rescale of 17 : 0 : 2 : 0

|              | f1-score | precision | recall   | support |
|--------------|----------|-----------|----------|---------|
| AFIB         | 0.673067 | 0.687696  | 0.659232 | 204.0   |
| GSVT         | 0.700851 | 0.696717  | 0.705054 | 300.0   |
| SB           | 0.715908 | 0.714320  | 0.717511 | 892.0   |
| SR           | 0.708731 | 0.708331  | 0.709149 | 681.0   |
| macro avg    | 0.699639 | 0.701766  | 0.697737 | 2077.0  |
| micro avg    | 0.707246 | 0.707246  | 0.707246 | 2077.0  |
| weighted avg | 0.707173 | 0.707199  | 0.707246 | 2077.0  |

The result of Model Number:Dataset Number:Featuregroup Number:Rescale of 17 : 0 : 2 : 1

|              | f1-score | precision | recall   | support |
|--------------|----------|-----------|----------|---------|
| AFIB         | 0.808673 | 0.803071  | 0.814517 | 875.0   |
| GSVT         | 0.821149 | 0.824481  | 0.817976 | 691.0   |
| SB           | 0.890948 | 0.881684  | 0.900413 | 1553.0  |
| SR           | 0.845963 | 0.865648  | 0.827231 | 907.0   |
| macro avg    | 0.841683 | 0.843721  | 0.840034 | 4026.0  |
| micro avg    | 0.851109 | 0.851109  | 0.851109 | 4026.0  |
| weighted avg | 0.850952 | 0.851167  | 0.851109 | 4026.0  |

The result of Model Number:Dataset Number:Featuregroup Number:Rescale of 17 : 0 : 3 : 0

|              | f1-score | precision | recall   | support |
|--------------|----------|-----------|----------|---------|
| AFIB         | 0.771467 | 0.787649  | 0.755957 | 204.0   |
| GSVT         | 0.789363 | 0.784693  | 0.794098 | 300.0   |
| SB           | 0.808607 | 0.806713  | 0.810511 | 892.0   |
| SR           | 0.801777 | 0.801547  | 0.802015 | 681.0   |
| macro avg    | 0.792804 | 0.795150  | 0.790645 | 2077.0  |
| micro avg    | 0.799996 | 0.799996  | 0.799996 | 2077.0  |
| weighted avg | 0.799940 | 0.799966  | 0.799996 | 2077.0  |

The result of Model Number:Dataset Number:Featuregroup Number:Rescale of 17 : 0 : 3 : 1

|      | f1-score | precision | recall   | support |
|------|----------|-----------|----------|---------|
| AFIB | 0.857298 | 0.889191  | 0.827999 | 204.0   |

GSVT 0.795541 0.832457 0.761833 300.0  
SB 0.833360 0.783096 0.890535 892.0  
SR 0.731851 0.782700 0.687292 681.0  
macro avg 0.804513 0.821861 0.791915 2077.0  
micro avg 0.799164 0.799164 0.799164 2077.0  
weighted avg 0.796966 0.800516 0.799164 2077.0  
The result of Model Number:Dataset Number:Featuregroup Number:Rescale of 17 : 0 : 4 :  
0

f1-score precision recall support  
AFIB 0.799550 0.815043 0.784994 204.0  
GSVT 0.830555 0.823610 0.837770 300.0  
SB 0.846052 0.844354 0.847759 892.0  
SR 0.837985 0.838853 0.837122 681.0  
macro avg 0.828535 0.830465 0.826911 2077.0  
micro avg 0.836664 0.836664 0.836664 2077.0  
weighted avg 0.836601 0.836675 0.836664 2077.0  
The result of Model Number:Dataset Number:Featuregroup Number:Rescale of 17 : 0 : 4 :  
1

f1-score precision recall support  
AFIB 0.569506 0.626964 0.522029 204.0  
GSVT 0.671614 0.662344 0.681255 300.0  
SB 0.713124 0.710745 0.715523 892.0  
SR 0.694862 0.685249 0.704758 681.0  
macro avg 0.662277 0.671326 0.655891 2077.0  
micro avg 0.688039 0.688039 0.688039 2077.0  
weighted avg 0.687035 0.687166 0.688039 2077.0  
The result of Model Number:Dataset Number:Featuregroup Number:Rescale of 17 : 0 : 5 :  
0

f1-score precision recall support  
AFIB 0.870248 0.858160 0.882765 875.0  
GSVT 0.901346 0.913371 0.889752 691.0  
SB 0.957522 0.955561 0.959496 1553.0  
SR 0.932601 0.939807 0.925506 907.0  
macro avg 0.915429 0.916725 0.914380 4026.0  
micro avg 0.923191 0.923191 0.923191 4026.0  
weighted avg 0.923298 0.923602 0.923191 4026.0  
The result of Model Number:Dataset Number:Featuregroup Number:Rescale of 17 : 0 : 5 :  
1

f1-score precision recall support  
AFIB 0.677827 0.675632 0.680057 875.0  
GSVT 0.685687 0.687817 0.683637 691.0  
SB 0.723511 0.721936 0.725095 1553.0  
SR 0.710169 0.713519 0.706876 907.0  
macro avg 0.699298 0.699726 0.698916 4026.0

micro avg 0.704087 0.704087 0.704087 4026.0  
weighted avg 0.704084 0.704120 0.704087 4026.0  
The result of Model Number:Dataset Number:Featuregroup Number:Rescale of 17 : 0 : 6 :  
0

|              | f1-score | precision | recall   | support |
|--------------|----------|-----------|----------|---------|
| AFIB         | 0.796361 | 0.789318  | 0.803564 | 875.0   |
| GSVT         | 0.724030 | 0.701168  | 0.805498 | 691.0   |
| SB           | 0.652752 | 0.626732  | 0.693443 | 1553.0  |
| SR           | 0.672756 | 0.679717  | 0.665980 | 907.0   |
| macro avg    | 0.711475 | 0.699234  | 0.742121 | 4026.0  |
| micro avg    | 0.730422 | 0.730422  | 0.730422 | 4026.0  |
| weighted avg | 0.700704 | 0.686781  | 0.730422 | 4026.0  |

The result of Model Number:Dataset Number:Featuregroup Number:Rescale of 17 : 0 : 6 :  
1

|              | f1-score | precision | recall   | support |
|--------------|----------|-----------|----------|---------|
| AFIB         | 0.913761 | 0.926118  | 0.902113 | 204.0   |
| GSVT         | 0.948469 | 0.946930  | 0.950047 | 300.0   |
| SB           | 0.969066 | 0.967776  | 0.970370 | 892.0   |
| SR           | 0.959161 | 0.957933  | 0.960427 | 681.0   |
| macro avg    | 0.947615 | 0.949689  | 0.945739 | 2077.0  |
| micro avg    | 0.957470 | 0.957470  | 0.957470 | 2077.0  |
| weighted avg | 0.957412 | 0.957446  | 0.957470 | 2077.0  |

The result of Model Number:Dataset Number:Featuregroup Number:Rescale of 17 : 0 : 7 :  
0

|              | f1-score | precision | recall   | support |
|--------------|----------|-----------|----------|---------|
| AFIB         | 0.878119 | 0.884035  | 0.872411 | 875.0   |
| GSVT         | 0.893790 | 0.881376  | 0.906723 | 691.0   |
| SB           | 0.952431 | 0.945909  | 0.959051 | 1553.0  |
| SR           | 0.913834 | 0.929619  | 0.898626 | 907.0   |
| macro avg    | 0.909543 | 0.910235  | 0.909203 | 4026.0  |
| micro avg    | 0.917627 | 0.917627  | 0.917627 | 4026.0  |
| weighted avg | 0.917520 | 0.917715  | 0.917627 | 4026.0  |

The result of Model Number:Dataset Number:Featuregroup Number:Rescale of 17 : 0 : 7 :  
1

|              | f1-score | precision | recall   | support |
|--------------|----------|-----------|----------|---------|
| AFIB         | 0.626473 | 0.611872  | 0.641889 | 875.0   |
| GSVT         | 0.601392 | 0.608002  | 0.594964 | 691.0   |
| SB           | 0.632869 | 0.592002  | 0.679811 | 1553.0  |
| SR           | 0.506513 | 0.608224  | 0.434216 | 907.0   |
| macro avg    | 0.591811 | 0.605025  | 0.587720 | 4026.0  |
| micro avg    | 0.601677 | 0.601677  | 0.601677 | 4026.0  |
| weighted avg | 0.597610 | 0.602721  | 0.601677 | 4026.0  |

The result of Model Number:Dataset Number:Featuregroup Number:Rescale of 17 : 0 : 8 :  
0

f1-score precision recall support  
AFIB 0.756039 0.762802 0.749488 875.0  
GSVT 0.770478 0.755828 0.785856 691.0  
SB 0.817798 0.810714 0.825011 1553.0  
SR 0.784209 0.802240 0.767006 907.0  
macro avg 0.782131 0.782896 0.781840 4026.0  
micro avg 0.788809 0.788809 0.788809 4026.0  
weighted avg 0.788687 0.788971 0.788809 4026.0  
The result of Model Number:Dataset Number:Featuregroup Number:Rescale of 17 : 0 : 8 :  
1

f1-score precision recall support  
AFIB 0.871973 0.880498 0.863817 875.0  
GSVT 0.865313 0.858748 0.872264 691.0  
SB 0.915600 0.906179 0.925299 1553.0  
SR 0.886537 0.900795 0.872974 907.0  
macro avg 0.884856 0.886555 0.883588 4026.0  
micro avg 0.891046 0.891046 0.891046 4026.0  
weighted avg 0.890940 0.891244 0.891046 4026.0  
The result of Model Number:Dataset Number:Featuregroup Number:Rescale of 17 : 0 : 9 :  
0

f1-score precision recall support  
AFIB 0.679370 0.675567 0.683249 875.0  
GSVT 0.684902 0.688943 0.680951 691.0  
SB 0.721488 0.719230 0.723763 1553.0  
SR 0.707205 0.711883 0.702604 907.0  
macro avg 0.698241 0.698906 0.697642 4026.0  
micro avg 0.702843 0.702843 0.702843 4026.0  
weighted avg 0.702837 0.702887 0.702843 4026.0  
The result of Model Number:Dataset Number:Featuregroup Number:Rescale of 17 : 0 : 9 :  
1

f1-score precision recall support  
AFIB 0.705074 0.695631 0.714821 875.0  
GSVT 0.720838 0.726464 0.715311 691.0  
SB 0.765329 0.762935 0.767743 1553.0  
SR 0.746821 0.756722 0.737190 907.0  
macro avg 0.734516 0.735438 0.733766 4026.0  
micro avg 0.740359 0.740359 0.740359 4026.0  
weighted avg 0.740428 0.740648 0.740359 4026.0  
The result of Model Number:Dataset Number:Featuregroup Number:Rescale of 17 : 0 :  
10 : 0

f1-score precision recall support  
AFIB 0.643052 0.658196 0.628645 875.0  
GSVT 0.677872 0.679584 0.676214 691.0  
SB 0.737199 0.734142 0.740283 1553.0

SR 0.701449 0.690402 0.712889 907.0  
macro avg 0.689893 0.690581 0.689508 4026.0  
micro avg 0.698852 0.698852 0.698852 4026.0  
weighted avg 0.698501 0.698418 0.698852 4026.0  
The result of Model Number:Dataset Number:Featuregroup Number:Rescale of 17 : 0 :  
10 : 1

f1-score precision recall support  
AFIB 0.706606 0.719575 0.694438 204.0  
GSVT 0.733430 0.727533 0.739558 300.0  
SB 0.747036 0.745702 0.748376 892.0  
SR 0.739639 0.740297 0.738986 681.0  
macro avg 0.731678 0.733277 0.730339 2077.0  
micro avg 0.738726 0.738726 0.738726 2077.0  
weighted avg 0.738675 0.738740 0.738726 2077.0  
The result of Model Number:Dataset Number:Featuregroup Number:Rescale of 17 : 1 : 0 :  
0

f1-score precision recall support  
AFIB 0.596221 0.591727 0.676703 204.0  
GSVT 0.722801 0.718521 0.727139 300.0  
SB 0.591150 0.589917 0.592393 892.0  
SR 0.731115 0.729944 0.732297 681.0  
macro avg 0.660322 0.657527 0.682133 2077.0  
micro avg 0.666008 0.666008 0.666008 2077.0  
weighted avg 0.656555 0.654582 0.666008 2077.0  
The result of Model Number:Dataset Number:Featuregroup Number:Rescale of 17 : 1 : 0 :  
1

f1-score precision recall support  
AFIB 0.857781 0.846749 0.869165 875.0  
GSVT 0.875242 0.882488 0.868150 691.0  
SB 0.935810 0.931645 0.940023 1553.0  
SR 0.909179 0.922626 0.896140 907.0  
macro avg 0.894503 0.895877 0.893370 4026.0  
micro avg 0.902401 0.902401 0.902401 4026.0  
weighted avg 0.902456 0.902725 0.902401 4026.0  
The result of Model Number:Dataset Number:Featuregroup Number:Rescale of 17 : 1 : 1 :  
0

f1-score precision recall support  
AFIB 0.710557 0.699858 0.727504 875.0  
GSVT 0.678453 0.676479 0.684241 691.0  
SB 0.724501 0.675119 0.787702 1553.0  
SR 0.536683 0.717386 0.444706 907.0  
macro avg 0.662548 0.692210 0.661038 4026.0  
micro avg 0.679589 0.679589 0.679589 4026.0  
weighted avg 0.671254 0.690251 0.679589 4026.0



The result of Model Number:Dataset Number:Featuregroup Number:Rescale of 17 : 1 : 1 : 1

|              | f1-score | precision | recall   | support |
|--------------|----------|-----------|----------|---------|
| AFIB         | 0.670451 | 0.674275  | 0.666782 | 204.0   |
| GSVT         | 0.684246 | 0.679311  | 0.689261 | 300.0   |
| SB           | 0.698065 | 0.695516  | 0.700646 | 892.0   |
| SR           | 0.690641 | 0.695176  | 0.686183 | 681.0   |
| macro avg    | 0.685851 | 0.686069  | 0.685718 | 2077.0  |
| micro avg    | 0.690933 | 0.690933  | 0.690933 | 2077.0  |
| weighted avg | 0.690923 | 0.690977  | 0.690933 | 2077.0  |

The result of Model Number:Dataset Number:Featuregroup Number:Rescale of 17 : 1 : 2 : 0

|              | f1-score | precision | recall   | support |
|--------------|----------|-----------|----------|---------|
| AFIB         | 0.905455 | 0.919338  | 0.892134 | 204.0   |
| GSVT         | 0.926925 | 0.919060  | 0.934964 | 300.0   |
| SB           | 0.943049 | 0.940005  | 0.946115 | 892.0   |
| SR           | 0.933358 | 0.936823  | 0.929931 | 681.0   |
| macro avg    | 0.927197 | 0.928807  | 0.925786 | 2077.0  |
| micro avg    | 0.933896 | 0.933896  | 0.933896 | 2077.0  |
| weighted avg | 0.933850 | 0.933907  | 0.933896 | 2077.0  |

The result of Model Number:Dataset Number:Featuregroup Number:Rescale of 17 : 1 : 2 : 1

|              | f1-score | precision | recall   | support |
|--------------|----------|-----------|----------|---------|
| AFIB         | 0.882112 | 0.891515  | 0.873050 | 204.0   |
| GSVT         | 0.898335 | 0.893407  | 0.903417 | 300.0   |
| SB           | 0.919071 | 0.917539  | 0.920614 | 892.0   |
| SR           | 0.911410 | 0.912895  | 0.909942 | 681.0   |
| macro avg    | 0.902732 | 0.903839  | 0.901756 | 2077.0  |
| micro avg    | 0.909959 | 0.909959  | 0.909959 | 2077.0  |
| weighted avg | 0.909934 | 0.909975  | 0.909959 | 2077.0  |

The result of Model Number:Dataset Number:Featuregroup Number:Rescale of 17 : 1 : 3 : 0

|              | f1-score | precision | recall   | support |
|--------------|----------|-----------|----------|---------|
| AFIB         | 0.747296 | 0.750710  | 0.743955 | 875.0   |
| GSVT         | 0.759755 | 0.753329  | 0.766346 | 691.0   |
| SB           | 0.803076 | 0.794875  | 0.811452 | 1553.0  |
| SR           | 0.761629 | 0.777685  | 0.746263 | 907.0   |
| macro avg    | 0.767939 | 0.769150  | 0.767004 | 4026.0  |
| micro avg    | 0.774355 | 0.774355  | 0.774355 | 4026.0  |
| weighted avg | 0.774180 | 0.774273  | 0.774355 | 4026.0  |

The result of Model Number:Dataset Number:Featuregroup Number:Rescale of 17 : 1 : 3 : 1

|      | f1-score | precision | recall   | support |
|------|----------|-----------|----------|---------|
| AFIB | 0.735688 | 0.735453  | 0.735962 | 875.0   |

GSVT 0.746652 0.737055 0.756591 691.0  
SB 0.789764 0.788046 0.791493 1553.0  
SR 0.767913 0.779169 0.756989 907.0  
macro avg 0.760004 0.759931 0.760259 4026.0  
micro avg 0.765660 0.765660 0.765660 4026.0  
weighted avg 0.765689 0.765864 0.765660 4026.0  
The result of Model Number:Dataset Number:Featuregroup Number:Rescale of 17 : 1 : 4 :  
0

f1-score precision recall support  
AFIB 0.941078 0.938470 0.943771 875.0  
GSVT 0.948526 0.953050 0.944139 691.0  
SB 0.992940 0.989767 0.996137 1553.0  
SR 0.977065 0.981785 0.972437 907.0  
macro avg 0.964902 0.965768 0.964121 4026.0  
micro avg 0.970492 0.970492 0.970492 4026.0  
weighted avg 0.970469 0.970518 0.970492 4026.0  
The result of Model Number:Dataset Number:Featuregroup Number:Rescale of 17 : 1 : 4 :  
1

f1-score precision recall support  
AFIB 0.816958 0.903341 0.746078 204.0  
GSVT 0.940017 0.929138 0.951333 300.0  
SB 0.993860 0.989773 0.997982 892.0  
SR 0.972516 0.958111 0.987372 681.0  
macro avg 0.930838 0.945091 0.920691 2077.0  
micro avg 0.963024 0.963024 0.963024 2077.0  
weighted avg 0.961710 0.962145 0.963024 2077.0  
The result of Model Number:Dataset Number:Featuregroup Number:Rescale of 17 : 1 : 5 :  
0

f1-score precision recall support  
AFIB 0.703924 0.697630 0.710363 875.0  
GSVT 0.715226 0.718056 0.712444 691.0  
SB 0.762584 0.761169 0.764007 1553.0  
SR 0.743260 0.750131 0.736541 907.0  
macro avg 0.731248 0.731746 0.730839 4026.0  
micro avg 0.737311 0.737311 0.737311 4026.0  
weighted avg 0.737353 0.737473 0.737311 4026.0  
The result of Model Number:Dataset Number:Featuregroup Number:Rescale of 17 : 1 : 5 :  
1

f1-score precision recall support  
AFIB 0.697635 0.704073 0.691351 875.0  
GSVT 0.713925 0.711998 0.715888 691.0  
SB 0.760340 0.753193 0.767632 1553.0  
SR 0.739333 0.746751 0.732075 907.0  
macro avg 0.727808 0.729004 0.726736 4026.0

micro avg 0.734162 0.734162 0.734162 4026.0  
weighted avg 0.734013 0.733996 0.734162 4026.0  
The result of Model Number:Dataset Number:Featuregroup Number:Rescale of 17 : 1 : 6 :  
0

|              | f1-score | precision | recall   | support |
|--------------|----------|-----------|----------|---------|
| AFIB         | 0.820548 | 0.832476  | 0.809329 | 204.0   |
| GSVT         | 0.838645 | 0.827299  | 0.850374 | 300.0   |
| SB           | 0.851267 | 0.842395  | 0.860333 | 892.0   |
| SR           | 0.834395 | 0.848202  | 0.821044 | 681.0   |
| macro avg    | 0.836214 | 0.837593  | 0.835270 | 2077.0  |
| micro avg    | 0.841003 | 0.841003  | 0.841003 | 2077.0  |
| weighted avg | 0.840895 | 0.841144  | 0.841003 | 2077.0  |

The result of Model Number:Dataset Number:Featuregroup Number:Rescale of 17 : 1 : 6 :  
1

|              | f1-score | precision | recall   | support |
|--------------|----------|-----------|----------|---------|
| AFIB         | 0.905981 | 0.937664  | 0.876787 | 204.0   |
| GSVT         | 0.944242 | 0.938486  | 0.950198 | 300.0   |
| SB           | 0.963631 | 0.959672  | 0.967627 | 892.0   |
| SR           | 0.954723 | 0.953331  | 0.956125 | 681.0   |
| macro avg    | 0.942144 | 0.947288  | 0.937684 | 2077.0  |
| micro avg    | 0.952416 | 0.952416  | 0.952416 | 2077.0  |
| weighted avg | 0.952247 | 0.952371  | 0.952416 | 2077.0  |

The result of Model Number:Dataset Number:Featuregroup Number:Rescale of 17 : 1 : 7 :  
0

|              | f1-score | precision | recall   | support |
|--------------|----------|-----------|----------|---------|
| AFIB         | 0.693349 | 0.699670  | 0.687232 | 204.0   |
| GSVT         | 0.711443 | 0.709114  | 0.713810 | 300.0   |
| SB           | 0.724449 | 0.723966  | 0.724935 | 892.0   |
| SR           | 0.718078 | 0.717871  | 0.718294 | 681.0   |
| macro avg    | 0.711830 | 0.712655  | 0.711068 | 2077.0  |
| micro avg    | 0.717448 | 0.717448  | 0.717448 | 2077.0  |
| weighted avg | 0.717427 | 0.717436  | 0.717448 | 2077.0  |

The result of Model Number:Dataset Number:Featuregroup Number:Rescale of 17 : 1 : 7 :  
1

|              | f1-score | precision | recall   | support |
|--------------|----------|-----------|----------|---------|
| AFIB         | 0.663974 | 0.679143  | 0.649637 | 204.0   |
| GSVT         | 0.694138 | 0.689817  | 0.698531 | 300.0   |
| SB           | 0.709129 | 0.706930  | 0.711352 | 892.0   |
| SR           | 0.701008 | 0.701332  | 0.700703 | 681.0   |
| macro avg    | 0.692062 | 0.694306  | 0.690056 | 2077.0  |
| micro avg    | 0.699947 | 0.699947  | 0.699947 | 2077.0  |
| weighted avg | 0.699866 | 0.699894  | 0.699947 | 2077.0  |

The result of Model Number:Dataset Number:Featuregroup Number:Rescale of 17 : 1 : 8 :  
0

f1-score precision recall support  
AFIB 0.766741 0.803912 0.732941 204.0  
GSVT 0.798674 0.788238 0.809552 300.0  
SB 0.820185 0.813948 0.826530 892.0  
SR 0.797348 0.799731 0.795015 681.0  
macro avg 0.795737 0.801457 0.791010 2077.0  
micro avg 0.804553 0.804553 0.804553 2077.0  
weighted avg 0.804341 0.804587 0.804553 2077.0  
The result of Model Number:Dataset Number:Featuregroup Number:Rescale of 17 : 1 : 8 :  
1

f1-score precision recall support  
AFIB 0.868830 0.936547 0.810648 204.0  
GSVT 0.895325 0.910481 0.880703 300.0  
SB 0.948876 0.940143 0.957802 892.0  
SR 0.911109 0.897897 0.924758 681.0  
macro avg 0.906035 0.921267 0.893478 2077.0  
micro avg 0.921378 0.921378 0.921378 2077.0  
weighted avg 0.920896 0.921654 0.921378 2077.0  
The result of Model Number:Dataset Number:Featuregroup Number:Rescale of 17 : 1 : 9 :  
0

f1-score precision recall support  
AFIB 0.810155 0.865069 0.762336 204.0  
GSVT 0.763358 0.786007 0.742265 300.0  
SB 0.797900 0.759597 0.840725 892.0  
SR 0.707989 0.740132 0.679293 681.0  
macro avg 0.769850 0.787701 0.756155 2077.0  
micro avg 0.765875 0.765875 0.765875 2077.0  
weighted avg 0.764635 0.767389 0.765875 2077.0  
The result of Model Number:Dataset Number:Featuregroup Number:Rescale of 17 : 1 : 9 :  
1

f1-score precision recall support  
AFIB 0.787134 0.793113 0.781313 204.0  
GSVT 0.803249 0.795404 0.811268 300.0  
SB 0.821986 0.819885 0.824105 892.0  
SR 0.813267 0.817861 0.808734 681.0  
macro avg 0.806409 0.806566 0.806355 2077.0  
micro avg 0.813008 0.813008 0.813008 2077.0  
weighted avg 0.812998 0.813056 0.813008 2077.0  
The result of Model Number:Dataset Number:Featuregroup Number:Rescale of 17 : 1 :  
10 : 0

f1-score precision recall support  
AFIB 0.793031 0.784269 0.802007 875.0  
GSVT 0.807319 0.812290 0.802423 691.0  
SB 0.859237 0.857807 0.860676 1553.0

SR 0.838315 0.846154 0.830641 907.0  
macro avg 0.824476 0.825130 0.823937 4026.0  
micro avg 0.831160 0.831160 0.831160 4026.0  
weighted avg 0.831224 0.831387 0.831160 4026.0  
The result of Model Number:Dataset Number:Featuregroup Number:Rescale of 17 : 1 :  
10 : 1

f1-score precision recall support  
AFIB 0.872138 0.890431 0.854604 204.0  
GSVT 0.892370 0.887090 0.897722 300.0  
SB 0.914125 0.911984 0.916277 892.0  
SR 0.906404 0.906143 0.906673 681.0  
macro avg 0.896259 0.898912 0.893819 2077.0  
micro avg 0.904390 0.904390 0.904390 2077.0  
weighted avg 0.904327 0.904356 0.904390 2077.0

The result of Model Number:Dataset Number:Featuregroup Number:Rescale of 18 : 0 : 0 :  
0

f1-score precision recall support  
AFIB 0.663369 0.662628 0.664132 875.0  
GSVT 0.675504 0.667055 0.684189 691.0  
SB 0.709613 0.703908 0.715416 1553.0  
SR 0.677953 0.695741 0.661063 907.0  
macro avg 0.681610 0.682333 0.681200 4026.0  
micro avg 0.686666 0.686666 0.686666 4026.0  
weighted avg 0.686576 0.686771 0.686666 4026.0

The result of Model Number:Dataset Number:Featuregroup Number:Rescale of 18 : 0 : 0 :  
1

f1-score precision recall support  
AFIB 0.702692 0.722467 0.684114 204.0  
GSVT 0.720858 0.715799 0.726126 300.0  
SB 0.740682 0.737718 0.743671 892.0  
SR 0.730837 0.731294 0.730402 681.0  
macro avg 0.723767 0.726819 0.721078 2077.0  
micro avg 0.730937 0.730937 0.730937 2077.0  
weighted avg 0.730859 0.730948 0.730937 2077.0

The result of Model Number:Dataset Number:Featuregroup Number:Rescale of 18 : 0 : 1 :  
0

f1-score precision recall support  
AFIB 0.897082 0.913590 0.881617 204.0  
GSVT 0.930180 0.922389 0.938264 300.0  
SB 0.947646 0.946058 0.949239 892.0  
SR 0.939279 0.940113 0.938451 681.0  
macro avg 0.928547 0.930538 0.926893 2077.0  
micro avg 0.937475 0.937475 0.937475 2077.0  
weighted avg 0.937414 0.937501 0.937475 2077.0

The result of Model Number:Dataset Number:Featuregroup Number:Rescale of 18 : 0 : 1 : 1

|              | f1-score | precision | recall   | support |
|--------------|----------|-----------|----------|---------|
| AFIB         | 0.796312 | 0.797942  | 0.794775 | 204.0   |
| GSVT         | 0.813827 | 0.810663  | 0.817072 | 300.0   |
| SB           | 0.831893 | 0.830783  | 0.833011 | 892.0   |
| SR           | 0.825783 | 0.828224  | 0.823359 | 681.0   |
| macro avg    | 0.816954 | 0.816903  | 0.817054 | 2077.0  |
| micro avg    | 0.823788 | 0.823788  | 0.823788 | 2077.0  |
| weighted avg | 0.823785 | 0.823812  | 0.823788 | 2077.0  |

The result of Model Number:Dataset Number:Featuregroup Number:Rescale of 18 : 0 : 2 : 0

|              | f1-score | precision | recall   | support |
|--------------|----------|-----------|----------|---------|
| AFIB         | 0.694773 | 0.711276  | 0.679081 | 204.0   |
| GSVT         | 0.717594 | 0.710866  | 0.724526 | 300.0   |
| SB           | 0.733005 | 0.732185  | 0.733827 | 892.0   |
| SR           | 0.725930 | 0.725200  | 0.726673 | 681.0   |
| macro avg    | 0.717825 | 0.719882  | 0.716027 | 2077.0  |
| micro avg    | 0.724761 | 0.724761  | 0.724761 | 2077.0  |
| weighted avg | 0.724704 | 0.724762  | 0.724761 | 2077.0  |

The result of Model Number:Dataset Number:Featuregroup Number:Rescale of 18 : 0 : 2 : 1

|              | f1-score | precision | recall   | support |
|--------------|----------|-----------|----------|---------|
| AFIB         | 0.748354 | 0.757543  | 0.739502 | 204.0   |
| GSVT         | 0.763427 | 0.760167  | 0.766734 | 300.0   |
| SB           | 0.772669 | 0.770349  | 0.775006 | 892.0   |
| SR           | 0.766165 | 0.767989  | 0.764375 | 681.0   |
| macro avg    | 0.762654 | 0.764012  | 0.761404 | 2077.0  |
| micro avg    | 0.766838 | 0.766838  | 0.766838 | 2077.0  |
| weighted avg | 0.766813 | 0.766847  | 0.766838 | 2077.0  |

The result of Model Number:Dataset Number:Featuregroup Number:Rescale of 18 : 0 : 3 : 0

|              | f1-score | precision | recall   | support |
|--------------|----------|-----------|----------|---------|
| AFIB         | 0.852780 | 0.852556  | 0.853085 | 875.0   |
| GSVT         | 0.870594 | 0.867302  | 0.874004 | 691.0   |
| SB           | 0.926879 | 0.922694  | 0.931115 | 1553.0  |
| SR           | 0.895641 | 0.905874  | 0.885671 | 907.0   |
| macro avg    | 0.886473 | 0.887107  | 0.885969 | 4026.0  |
| micro avg    | 0.894116 | 0.894116  | 0.894116 | 4026.0  |
| weighted avg | 0.894076 | 0.894154  | 0.894116 | 4026.0  |

The result of Model Number:Dataset Number:Featuregroup Number:Rescale of 18 : 0 : 3 : 1

|      | f1-score | precision | recall   | support |
|------|----------|-----------|----------|---------|
| AFIB | 0.879192 | 0.939223  | 0.826750 | 204.0   |

GSVT 0.929394 0.910455 0.949219 300.0  
SB 0.952446 0.944096 0.960981 892.0  
SR 0.928952 0.932046 0.925962 681.0  
macro avg 0.922496 0.931455 0.915728 2077.0  
micro avg 0.934616 0.934616 0.934616 2077.0  
weighted avg 0.934218 0.934807 0.934616 2077.0  
The result of Model Number:Dataset Number:Featuregroup Number:Rescale of 18 : 0 : 4 :  
0

f1-score precision recall support  
AFIB 0.686108 0.677284 0.695214 875.0  
GSVT 0.700075 0.705870 0.694402 691.0  
SB 0.748521 0.745189 0.751891 1553.0  
SR 0.727219 0.737975 0.716790 907.0  
macro avg 0.715481 0.716580 0.714574 4026.0  
micro avg 0.721798 0.721798 0.721798 4026.0  
weighted avg 0.721842 0.722057 0.721798 4026.0  
The result of Model Number:Dataset Number:Featuregroup Number:Rescale of 18 : 0 : 4 :  
1

f1-score precision recall support  
AFIB 0.698270 0.717519 0.680166 204.0  
GSVT 0.716853 0.703583 0.730701 300.0  
SB 0.728479 0.721668 0.735420 892.0  
SR 0.710168 0.719816 0.700787 681.0  
macro avg 0.713442 0.715646 0.711769 2077.0  
micro avg 0.717956 0.717956 0.717956 2077.0  
weighted avg 0.717829 0.718041 0.717956 2077.0  
The result of Model Number:Dataset Number:Featuregroup Number:Rescale of 18 : 0 : 5 :  
0

f1-score precision recall support  
AFIB 0.691133 0.682068 0.700475 875.0  
GSVT 0.701714 0.709514 0.694097 691.0  
SB 0.744259 0.742502 0.746028 1553.0  
SR 0.725625 0.732156 0.719220 907.0  
macro avg 0.715683 0.716560 0.714955 4026.0  
micro avg 0.721175 0.721175 0.721175 4026.0  
weighted avg 0.721212 0.721375 0.721175 4026.0  
The result of Model Number:Dataset Number:Featuregroup Number:Rescale of 18 : 0 : 5 :  
1

f1-score precision recall support  
AFIB 0.805002 0.859566 0.757486 204.0  
GSVT 0.758502 0.781007 0.737543 300.0  
SB 0.792824 0.754765 0.835377 892.0  
SR 0.703485 0.735424 0.674972 681.0  
macro avg 0.764953 0.782690 0.751345 2077.0

micro avg 0.761003 0.761003 0.761003 2077.0  
weighted avg 0.759770 0.762507 0.761003 2077.0  
The result of Model Number:Dataset Number:Featuregroup Number:Rescale of 18 : 0 : 6 :  
0

|              | f1-score | precision | recall   | support |
|--------------|----------|-----------|----------|---------|
| AFIB         | 0.725900 | 0.740462  | 0.712044 | 204.0   |
| GSVT         | 0.742723 | 0.735003  | 0.750647 | 300.0   |
| SB           | 0.756459 | 0.753517  | 0.759427 | 892.0   |
| SR           | 0.748510 | 0.751633  | 0.745430 | 681.0   |
| macro avg    | 0.743398 | 0.745154  | 0.741887 | 2077.0  |
| micro avg    | 0.748916 | 0.748916  | 0.748916 | 2077.0  |
| weighted avg | 0.748867 | 0.748943  | 0.748916 | 2077.0  |

The result of Model Number:Dataset Number:Featuregroup Number:Rescale of 18 : 0 : 6 :  
1

|              | f1-score | precision | recall   | support |
|--------------|----------|-----------|----------|---------|
| AFIB         | 0.669355 | 0.677182  | 0.661832 | 204.0   |
| GSVT         | 0.603762 | 0.580711  | 0.688884 | 300.0   |
| SB           | 0.560168 | 0.558848  | 0.561499 | 892.0   |
| SR           | 0.695539 | 0.696876  | 0.694213 | 681.0   |
| macro avg    | 0.632206 | 0.628404  | 0.651607 | 2077.0  |
| micro avg    | 0.633267 | 0.633267  | 0.633267 | 2077.0  |
| weighted avg | 0.621574 | 0.618885  | 0.633267 | 2077.0  |

The result of Model Number:Dataset Number:Featuregroup Number:Rescale of 18 : 0 : 7 :  
0

|              | f1-score  | precision | recall    | support |
|--------------|-----------|-----------|-----------|---------|
| AFIB         | 0.964130  | 0.974231  | 0.954444  | 204.0   |
| GSVT         | 0.9791332 | 0.9771854 | 0.9801256 | 300.0   |
| SB           | 0.9963326 | 0.9941962 | 0.9992955 | 892.0   |
| SR           | 0.9891665 | 0.9904365 | 0.9891845 | 681.0   |
| macro avg    | 0.9822256 | 0.9843124 | 0.9804356 | 2077.0  |
| micro avg    | 0.9883564 | 0.9884429 | 0.9883211 | 2077.0  |
| weighted avg | 0.9880449 | 0.9882568 | 0.9883568 | 2077.0  |

The result of Model Number:Dataset Number:Featuregroup Number:Rescale of 18 : 0 : 7 :  
1

|              | f1-score   | precision  | recall      | support |
|--------------|------------|------------|-------------|---------|
| AFIB         | 0.9632589  | 0.9742568  | 0.9535896   | 204.0   |
| GSVT         | 0.9783333  | 0.9765455  | 0.98125488  | 300.0   |
| SB           | 0.99655245 | 0.99468745 | 0.9993566   | 892.0   |
| SR           | 0.9882335  | 0.99125466 | 0.989854333 | 681.0   |
| macro avg    | 0.98256333 | 0.98395688 | 0.98045211  | 2077.0  |
| micro avg    | 0.9889565  | 0.9885657  | 0.9884911   | 2077.0  |
| weighted avg | 0.9884256  | 0.9885877  | 0.988324561 | 2077.0  |

The result of Model Number:Dataset Number:Featuregroup Number:Rescale of 18 : 0 : 8 :  
0



f1-score precision recall support  
AFIB 0.179182 0.181064 0.177339 175.0  
GSVT 0.179471 0.177564 0.181419 138.2  
SB 0.189014 0.188290 0.189745 310.6  
SR 0.184640 0.185565 0.183724 181.4  
macro avg 0.183077 0.183121 0.183057 805.2  
micro avg 0.184263 0.184263 0.184263 805.2  
weighted avg 0.184254 0.184265 0.184263 805.2  
The result of Model Number:Dataset Number:Featuregroup Number:Rescale of 18 : 0 : 8 :  
1

f1-score precision recall support  
AFIB 0.869467 0.907625 0.834607 204.0  
GSVT 0.809417 0.815245 0.804005 300.0  
SB 0.839429 0.797276 0.886293 892.0  
SR 0.744705 0.793874 0.701429 681.0  
macro avg 0.815755 0.828505 0.806583 2077.0  
micro avg 0.808718 0.808718 0.808718 2077.0  
weighted avg 0.806987 0.809594 0.808718 2077.0  
The result of Model Number:Dataset Number:Featuregroup Number:Rescale of 18 : 0 : 9 :  
0

f1-score precision recall support  
AFIB 0.683142 0.673450 0.693133 875.0  
GSVT 0.697197 0.703992 0.690537 691.0  
SB 0.741953 0.739535 0.744389 1553.0  
SR 0.724626 0.733888 0.715604 907.0  
macro avg 0.711730 0.712716 0.710916 4026.0  
micro avg 0.717521 0.717521 0.717521 4026.0  
weighted avg 0.717586 0.717800 0.717521 4026.0  
The result of Model Number:Dataset Number:Featuregroup Number:Rescale of 18 : 0 : 9 :  
1

f1-score precision recall support  
AFIB 0.757860 0.761725 0.754057 875.0  
GSVT 0.768318 0.764321 0.772424 691.0  
SB 0.805317 0.804598 0.806044 1553.0  
SR 0.790489 0.791133 0.789878 907.0  
macro avg 0.780496 0.780444 0.780601 4026.0  
micro avg 0.785333 0.785333 0.785333 4026.0  
weighted avg 0.785312 0.785334 0.785333 4026.0  
The result of Model Number:Dataset Number:Featuregroup Number:Rescale of 18 : 0 :  
10 : 0

f1-score precision recall support  
AFIB 0.649464 0.649140 0.649817 875.0  
GSVT 0.657543 0.661942 0.653254 691.0  
SB 0.697085 0.695484 0.698699 1553.0

SR 0.676895 0.676734 0.677173 907.0  
macro avg 0.670247 0.670825 0.669736 4026.0  
micro avg 0.675426 0.675426 0.675426 4026.0  
weighted avg 0.675400 0.675431 0.675426 4026.0  
The result of Model Number:Dataset Number:Featuregroup Number:Rescale of 18 : 0 :

10 : 1

f1-score precision recall support

AFIB 0.870227 0.870382 0.870110 875.0  
GSVT 0.879434 0.882405 0.876538 691.0  
SB 0.923800 0.920615 0.927012 1553.0  
SR 0.906258 0.909314 0.903255 907.0  
macro avg 0.894930 0.895679 0.894229 4026.0  
micro avg 0.900630 0.900630 0.900630 4026.0  
weighted avg 0.900590 0.900593 0.900630 4026.0

The result of Model Number:Dataset Number:Featuregroup Number:Rescale of 18 : 1 : 0 :  
0

f1-score precision recall support

AFIB 0.652314 0.677663 0.628841 875.0  
GSVT 0.701259 0.696080 0.706608 691.0  
SB 0.770630 0.766660 0.774647 1553.0  
SR 0.725233 0.711403 0.739689 907.0  
macro avg 0.712359 0.712951 0.712446 4026.0  
micro avg 0.723405 0.723405 0.723405 4026.0  
weighted avg 0.722782 0.722755 0.723405 4026.0

The result of Model Number:Dataset Number:Featuregroup Number:Rescale of 18 : 1 : 0 :  
1

f1-score precision recall support

AFIB 0.754940 0.748934 0.761114 875.0  
GSVT 0.725006 0.711221 0.739396 691.0  
SB 0.760920 0.702395 0.830097 1553.0  
SR 0.582653 0.745008 0.478507 907.0  
macro avg 0.705880 0.726889 0.702278 4026.0  
micro avg 0.720329 0.720329 0.720329 4026.0  
weighted avg 0.713295 0.723625 0.720329 4026.0

The result of Model Number:Dataset Number:Featuregroup Number:Rescale of 18 : 1 : 1 :  
0

f1-score precision recall support

AFIB 0.798478 0.800461 0.796558 875.0  
GSVT 0.812228 0.814669 0.809906 691.0  
SB 0.861628 0.855780 0.867563 1553.0  
SR 0.845232 0.851507 0.839082 907.0  
macro avg 0.829392 0.830604 0.828277 4026.0  
micro avg 0.835819 0.835819 0.835819 4026.0  
weighted avg 0.835731 0.835738 0.835819 4026.0

The result of Model Number:Dataset Number:Featuregroup Number:Rescale of 18 : 1 : 1 : 1

|              | f1-score | precision | recall   | support |
|--------------|----------|-----------|----------|---------|
| AFIB         | 0.785267 | 0.809541  | 0.763092 | 204.0   |
| GSVT         | 0.733037 | 0.748973  | 0.718306 | 300.0   |
| SB           | 0.773169 | 0.738854  | 0.810864 | 892.0   |
| SR           | 0.696154 | 0.731926  | 0.663813 | 681.0   |
| macro avg    | 0.746907 | 0.757324  | 0.739019 | 2077.0  |
| micro avg    | 0.744589 | 0.744589  | 0.744589 | 2077.0  |
| weighted avg | 0.743309 | 0.744987  | 0.744589 | 2077.0  |

The result of Model Number:Dataset Number:Featuregroup Number:Rescale of 18 : 1 : 2 : 0

|              | f1-score | precision | recall   | support |
|--------------|----------|-----------|----------|---------|
| AFIB         | 0.878616 | 0.897712  | 0.860556 | 204.0   |
| GSVT         | 0.914885 | 0.909488  | 0.920371 | 300.0   |
| SB           | 0.934541 | 0.932468  | 0.936633 | 892.0   |
| SR           | 0.925172 | 0.924650  | 0.925718 | 681.0   |
| macro avg    | 0.913303 | 0.916080  | 0.910820 | 2077.0  |
| micro avg    | 0.923233 | 0.923233  | 0.923233 | 2077.0  |
| weighted avg | 0.923137 | 0.923172  | 0.923233 | 2077.0  |

The result of Model Number:Dataset Number:Featuregroup Number:Rescale of 18 : 1 : 2 : 1

|              | f1-score | precision | recall   | support |
|--------------|----------|-----------|----------|---------|
| AFIB         | 0.732700 | 0.738508  | 0.727001 | 875.0   |
| GSVT         | 0.741989 | 0.738718  | 0.745314 | 691.0   |
| SB           | 0.789018 | 0.785898  | 0.792167 | 1553.0  |
| SR           | 0.769629 | 0.771803  | 0.767504 | 907.0   |
| macro avg    | 0.758334 | 0.758732  | 0.757997 | 4026.0  |
| micro avg    | 0.764406 | 0.764406  | 0.764406 | 4026.0  |
| weighted avg | 0.764338 | 0.764325  | 0.764406 | 4026.0  |

The result of Model Number:Dataset Number:Featuregroup Number:Rescale of 18 : 1 : 3 : 0

|              | f1-score | precision | recall   | support |
|--------------|----------|-----------|----------|---------|
| AFIB         | 0.718535 | 0.765352  | 0.677433 | 204.0   |
| GSVT         | 0.750012 | 0.731577  | 0.769503 | 300.0   |
| SB           | 0.772008 | 0.762091  | 0.782214 | 892.0   |
| SR           | 0.751956 | 0.760935  | 0.743237 | 681.0   |
| macro avg    | 0.748128 | 0.754989  | 0.743097 | 2077.0  |
| micro avg    | 0.757307 | 0.757307  | 0.757307 | 2077.0  |
| weighted avg | 0.757005 | 0.757625  | 0.757307 | 2077.0  |

The result of Model Number:Dataset Number:Featuregroup Number:Rescale of 18 : 1 : 3 : 1

|      | f1-score | precision | recall   | support |
|------|----------|-----------|----------|---------|
| AFIB | 0.897665 | 0.892295  | 0.903222 | 875.0   |

GSVT 0.905016 0.909902 0.900313 691.0  
SB 0.959182 0.956378 0.962017 1553.0  
SR 0.937508 0.944242 0.930887 907.0  
macro avg 0.924843 0.925704 0.924110 4026.0  
micro avg 0.931635 0.931635 0.931635 4026.0  
weighted avg 0.931632 0.931739 0.931635 4026.0  
The result of Model Number:Dataset Number:Featuregroup Number:Rescale of 18 : 1 : 4 :  
0

f1-score precision recall support  
AFIB 0.699644 0.766985 0.643413 204.0  
GSVT 0.813689 0.805328 0.822377 300.0  
SB 0.862572 0.859217 0.865956 892.0  
SR 0.842587 0.830935 0.854584 681.0  
macro avg 0.804623 0.815616 0.796582 2077.0  
micro avg 0.834075 0.834075 0.834075 2077.0  
weighted avg 0.832956 0.833102 0.834075 2077.0  
The result of Model Number:Dataset Number:Featuregroup Number:Rescale of 18 : 1 : 4 :  
1

f1-score precision recall support  
AFIB 0.781827 0.780891 0.782897 875.0  
GSVT 0.797067 0.799809 0.794426 691.0  
SB 0.844213 0.839012 0.849485 1553.0  
SR 0.827033 0.835110 0.819202 907.0  
macro avg 0.812535 0.813706 0.811502 4026.0  
micro avg 0.818740 0.818740 0.818740 4026.0  
weighted avg 0.818692 0.818773 0.818740 4026.0  
The result of Model Number:Dataset Number:Featuregroup Number:Rescale of 18 : 1 : 5 :  
0

f1-score precision recall support  
AFIB 0.811582 0.809532 0.813769 875.0  
GSVT 0.827416 0.822867 0.832060 691.0  
SB 0.866370 0.861146 0.871668 1553.0  
SR 0.840825 0.856001 0.826194 907.0  
macro avg 0.836548 0.837387 0.835923 4026.0  
micro avg 0.842042 0.842042 0.842042 4026.0  
weighted avg 0.842022 0.842199 0.842042 4026.0  
The result of Model Number:Dataset Number:Featuregroup Number:Rescale of 18 : 1 : 5 :  
1

f1-score precision recall support  
AFIB 0.853762 0.896420 0.815410 204.0  
GSVT 0.879501 0.863202 0.896734 300.0  
SB 0.899629 0.890560 0.908902 892.0  
SR 0.874678 0.882491 0.867082 681.0  
macro avg 0.876893 0.883168 0.872032 2077.0

micro avg 0.884250 0.884250 0.884250 2077.0  
weighted avg 0.884036 0.884539 0.884250 2077.0  
The result of Model Number:Dataset Number:Featuregroup Number:Rescale of 18 : 1 : 6 :  
0

|              | f1-score | precision | recall   | support |
|--------------|----------|-----------|----------|---------|
| AFIB         | 0.869403 | 0.888742  | 0.851073 | 204.0   |
| GSVT         | 0.906444 | 0.900811  | 0.912183 | 300.0   |
| SB           | 0.926121 | 0.924170  | 0.928091 | 892.0   |
| SR           | 0.916256 | 0.915609  | 0.916934 | 681.0   |
| macro avg    | 0.904556 | 0.907333  | 0.902070 | 2077.0  |
| micro avg    | 0.914571 | 0.914571  | 0.914571 | 2077.0  |
| weighted avg | 0.914474 | 0.914509  | 0.914571 | 2077.0  |

The result of Model Number:Dataset Number:Featuregroup Number:Rescale of 18 : 1 : 6 :  
1

|              | f1-score | precision | recall   | support |
|--------------|----------|-----------|----------|---------|
| AFIB         | 0.622168 | 0.598383  | 0.661305 | 875.0   |
| GSVT         | 0.644672 | 0.622422  | 0.674850 | 691.0   |
| SB           | 0.718284 | 0.705605  | 0.732216 | 1553.0  |
| SR           | 0.608370 | 0.731530  | 0.525245 | 907.0   |
| macro avg    | 0.648373 | 0.664485  | 0.648404 | 4026.0  |
| micro avg    | 0.660331 | 0.660331  | 0.660331 | 4026.0  |
| weighted avg | 0.659998 | 0.673865  | 0.660331 | 4026.0  |

The result of Model Number:Dataset Number:Featuregroup Number:Rescale of 18 : 1 : 7 :  
0

|              | f1-score | precision | recall   | support |
|--------------|----------|-----------|----------|---------|
| AFIB         | 0.717448 | 0.709521  | 0.725569 | 875.0   |
| GSVT         | 0.730375 | 0.734872  | 0.725945 | 691.0   |
| SB           | 0.777344 | 0.776050  | 0.778646 | 1553.0  |
| SR           | 0.758416 | 0.765508  | 0.751474 | 907.0   |
| macro avg    | 0.745896 | 0.746488  | 0.745408 | 4026.0  |
| micro avg    | 0.751943 | 0.751943  | 0.751943 | 4026.0  |
| weighted avg | 0.752001 | 0.752148  | 0.751943 | 4026.0  |

The result of Model Number:Dataset Number:Featuregroup Number:Rescale of 18 : 1 : 7 :  
1

|              | f1-score | precision | recall   | support |
|--------------|----------|-----------|----------|---------|
| AFIB         | 0.830710 | 0.826060  | 0.835454 | 875.0   |
| GSVT         | 0.837475 | 0.842416  | 0.832643 | 691.0   |
| SB           | 0.882211 | 0.879450  | 0.884993 | 1553.0  |
| SR           | 0.864746 | 0.870467  | 0.859120 | 907.0   |
| macro avg    | 0.853786 | 0.854598  | 0.853052 | 4026.0  |
| micro avg    | 0.859412 | 0.859412  | 0.859412 | 4026.0  |
| weighted avg | 0.859405 | 0.859466  | 0.859412 | 4026.0  |

The result of Model Number:Dataset Number:Featuregroup Number:Rescale of 18 : 1 : 8 :  
0

f1-score precision recall support  
AFIB 0.707948 0.711202 0.704758 875.0  
GSVT 0.678521 0.682609 0.674505 691.0  
SB 0.727825 0.695383 0.763479 1553.0  
SR 0.622450 0.677618 0.575713 907.0  
macro avg 0.684186 0.691703 0.679614 4026.0  
micro avg 0.693145 0.693145 0.693145 4026.0  
weighted avg 0.691303 0.692626 0.693145 4026.0  
The result of Model Number:Dataset Number:Featuregroup Number:Rescale of 18 : 1 : 8 :  
1

f1-score precision recall support  
AFIB 0.742555 0.766357 0.720410 204.0  
GSVT 0.764770 0.751613 0.778510 300.0  
SB 0.778000 0.770309 0.785848 892.0  
SR 0.757198 0.766673 0.747970 681.0  
macro avg 0.760631 0.763738 0.758184 2077.0  
micro avg 0.765942 0.765942 0.765942 2077.0  
weighted avg 0.765787 0.766028 0.765942 2077.0  
The result of Model Number:Dataset Number:Featuregroup Number:Rescale of 18 : 1 : 9 :  
0

f1-score precision recall support  
AFIB 0.761576 0.767360 0.755943 204.0  
GSVT 0.777168 0.769577 0.784926 300.0  
SB 0.795296 0.793263 0.797346 892.0  
SR 0.786860 0.791305 0.782474 681.0  
macro avg 0.780225 0.780376 0.780172 2077.0  
micro avg 0.786609 0.786609 0.786609 2077.0  
weighted avg 0.786599 0.786655 0.786609 2077.0  
The result of Model Number:Dataset Number:Featuregroup Number:Rescale of 18 : 1 : 9 :  
1

f1-score precision recall support  
AFIB 0.905047 0.911381 0.898833 204.0  
GSVT 0.926104 0.921538 0.930730 300.0  
SB 0.944511 0.942939 0.946099 892.0  
SR 0.935110 0.937330 0.932912 681.0  
macro avg 0.927693 0.928297 0.927143 2077.0  
micro avg 0.934913 0.934913 0.934913 2077.0  
weighted avg 0.934894 0.934909 0.934913 2077.0  
The result of Model Number:Dataset Number:Featuregroup Number:Rescale of 18 : 1 :  
10 : 0

f1-score precision recall support  
AFIB 0.885177 0.877263 0.893275 875.0  
GSVT 0.899390 0.902948 0.895891 691.0  
SB 0.958942 0.957162 0.960732 1553.0

SR 0.934642 0.943282 0.926193 907.0  
macro avg 0.919538 0.920164 0.919023 4026.0  
micro avg 0.927161 0.927161 0.927161 4026.0  
weighted avg 0.927214 0.927365 0.927161 4026.0  
The result of Model Number:Dataset Number:Featuregroup Number:Rescale of 18 : 1 : 10 : 1

f1-score precision recall support  
AFIB 0.659260 0.690911 0.630513 204.0  
GSVT 0.687935 0.682093 0.693896 300.0  
SB 0.698746 0.693657 0.703914 892.0  
SR 0.691396 0.691716 0.691096 681.0  
macro avg 0.684334 0.689594 0.679855 2077.0  
micro avg 0.691055 0.691055 0.691055 2077.0  
weighted avg 0.690896 0.691081 0.691055 2077.0

The result of Model Number:Dataset Number:Featuregroup Number:Rescale of 19 : 0 : 0 : 0

f1-score precision recall support  
AFIB 0.726600 0.736886 0.717194 204.0  
GSVT 0.741686 0.728030 0.756000 300.0  
SB 0.757494 0.749118 0.766071 892.0  
SR 0.741574 0.756678 0.727106 681.0  
macro avg 0.741839 0.742678 0.741593 2077.0  
micro avg 0.747040 0.747040 0.747040 2077.0  
weighted avg 0.746957 0.747350 0.747040 2077.0

The result of Model Number:Dataset Number:Featuregroup Number:Rescale of 19 : 0 : 0 : 1

f1-score precision recall support  
AFIB 0.795715 0.837611 0.758024 204.0  
GSVT 0.835672 0.828352 0.843159 300.0  
SB 0.857356 0.852063 0.862731 892.0  
SR 0.845659 0.843944 0.847401 681.0  
macro avg 0.833600 0.840493 0.827829 2077.0  
micro avg 0.844593 0.844593 0.844593 2077.0  
weighted avg 0.844335 0.844557 0.844593 2077.0

The result of Model Number:Dataset Number:Featuregroup Number:Rescale of 19 : 0 : 1 : 0

f1-score precision recall support  
AFIB 0.864178 0.859008 0.869527 875.0  
GSVT 0.871254 0.875958 0.866727 691.0  
SB 0.923399 0.920700 0.926128 1553.0  
SR 0.902534 0.909017 0.896160 907.0  
macro avg 0.890341 0.891171 0.889636 4026.0  
micro avg 0.896880 0.896880 0.896880 4026.0  
weighted avg 0.896878 0.896981 0.896880 4026.0

The result of Model Number:Dataset Number:Featuregroup Number:Rescale of 19 : 0 : 1 : 1

|              | f1-score | precision | recall   | support |
|--------------|----------|-----------|----------|---------|
| AFIB         | 0.887041 | 0.891246  | 0.882882 | 875.0   |
| GSVT         | 0.898045 | 0.893808  | 0.902343 | 691.0   |
| SB           | 0.947228 | 0.945228  | 0.949241 | 1553.0  |
| SR           | 0.929278 | 0.931880  | 0.926712 | 907.0   |
| macro avg    | 0.915398 | 0.915541  | 0.915294 | 4026.0  |
| micro avg    | 0.921694 | 0.921694  | 0.921694 | 4026.0  |
| weighted avg | 0.921662 | 0.921663  | 0.921694 | 4026.0  |

The result of Model Number:Dataset Number:Featuregroup Number:Rescale of 19 : 0 : 2 : 0

|              | f1-score | precision | recall   | support |
|--------------|----------|-----------|----------|---------|
| AFIB         | 0.717243 | 0.731884  | 0.703492 | 204.0   |
| GSVT         | 0.743287 | 0.736829  | 0.749994 | 300.0   |
| SB           | 0.757578 | 0.756225  | 0.758937 | 892.0   |
| SR           | 0.750526 | 0.750974  | 0.750084 | 681.0   |
| macro avg    | 0.742158 | 0.743978  | 0.740627 | 2077.0  |
| micro avg    | 0.749297 | 0.749297  | 0.749297 | 2077.0  |
| weighted avg | 0.749240 | 0.749311  | 0.749297 | 2077.0  |

The result of Model Number:Dataset Number:Featuregroup Number:Rescale of 19 : 0 : 2 : 1

|              | f1-score | precision | recall   | support |
|--------------|----------|-----------|----------|---------|
| AFIB         | 0.745423 | 0.728483  | 0.763221 | 875.0   |
| GSVT         | 0.770969 | 0.783472  | 0.758923 | 691.0   |
| SB           | 0.822540 | 0.822545  | 0.822540 | 1553.0  |
| SR           | 0.801488 | 0.810619  | 0.792562 | 907.0   |
| macro avg    | 0.785105 | 0.786280  | 0.784312 | 4026.0  |
| micro avg    | 0.791975 | 0.791975  | 0.791975 | 4026.0  |
| weighted avg | 0.792185 | 0.792709  | 0.791975 | 4026.0  |

The result of Model Number:Dataset Number:Featuregroup Number:Rescale of 19 : 0 : 3 : 0

|              | f1-score | precision | recall   | support |
|--------------|----------|-----------|----------|---------|
| AFIB         | 0.791218 | 0.826947  | 0.758708 | 204.0   |
| GSVT         | 0.818738 | 0.809543  | 0.828293 | 300.0   |
| SB           | 0.787595 | 0.753258  | 0.842738 | 892.0   |
| SR           | 0.656175 | 0.661770  | 0.650785 | 681.0   |
| macro avg    | 0.763432 | 0.762879  | 0.770131 | 2077.0  |
| micro avg    | 0.769462 | 0.769462  | 0.769462 | 2077.0  |
| weighted avg | 0.749360 | 0.738628  | 0.769462 | 2077.0  |

The result of Model Number:Dataset Number:Featuregroup Number:Rescale of 19 : 0 : 3 : 1

|      | f1-score | precision | recall   | support |
|------|----------|-----------|----------|---------|
| AFIB | 0.784399 | 0.821954  | 0.750311 | 204.0   |



GSVT 0.826184 0.817339 0.835252 300.0  
SB 0.843732 0.839071 0.848456 892.0  
SR 0.834201 0.833478 0.834940 681.0  
macro avg 0.822129 0.827961 0.817240 2077.0  
micro avg 0.832478 0.832478 0.832478 2077.0  
weighted avg 0.832245 0.832417 0.832478 2077.0  
The result of Model Number:Dataset Number:Featuregroup Number:Rescale of 19 : 0 : 4 :  
0

f1-score precision recall support  
AFIB 0.704128 0.699523 0.708854 875.0  
GSVT 0.725056 0.731225 0.719086 691.0  
SB 0.771919 0.770238 0.773610 1553.0  
SR 0.753107 0.756131 0.750119 907.0  
macro avg 0.738553 0.739279 0.737917 4026.0  
micro avg 0.744886 0.744886 0.744886 4026.0  
weighted avg 0.744904 0.744995 0.744886 4026.0  
The result of Model Number:Dataset Number:Featuregroup Number:Rescale of 19 : 0 : 4 :  
1

f1-score precision recall support  
AFIB 0.661450 0.666679 0.656324 875.0  
GSVT 0.678094 0.676660 0.679559 691.0  
SB 0.722868 0.716479 0.729381 1553.0  
SR 0.703624 0.710525 0.696873 907.0  
macro avg 0.691509 0.692586 0.690534 4026.0  
micro avg 0.697629 0.697629 0.697629 4026.0  
weighted avg 0.697499 0.697480 0.697629 4026.0  
The result of Model Number:Dataset Number:Featuregroup Number:Rescale of 19 : 0 : 5 :  
0

f1-score precision recall support  
AFIB 0.922831 0.941669 0.905139 204.0  
GSVT 0.956340 0.948032 0.964971 300.0  
SB 0.974727 0.972987 0.976476 892.0  
SR 0.965655 0.966230 0.965085 681.0  
macro avg 0.954888 0.957230 0.952918 2077.0  
micro avg 0.964073 0.964073 0.964073 2077.0  
weighted avg 0.964000 0.964091 0.964073 2077.0  
The result of Model Number:Dataset Number:Featuregroup Number:Rescale of 19 : 0 : 5 :  
1

f1-score precision recall support  
AFIB 0.879611 0.891360 0.868415 204.0  
GSVT 0.895150 0.889697 0.900807 300.0  
SB 0.916728 0.915915 0.917548 892.0  
SR 0.909954 0.910092 0.909822 681.0  
macro avg 0.900360 0.901766 0.899148 2077.0

micro avg 0.907771 0.907771 0.907771 2077.0  
weighted avg 0.907744 0.907807 0.907771 2077.0  
The result of Model Number:Dataset Number:Featuregroup Number:Rescale of 19 : 0 : 6 :  
0

|              | f1-score | precision | recall   | support |
|--------------|----------|-----------|----------|---------|
| AFIB         | 0.765407 | 0.784467  | 0.747288 | 875.0   |
| GSVT         | 0.808707 | 0.812141  | 0.805337 | 691.0   |
| SB           | 0.877190 | 0.873834  | 0.880577 | 1553.0  |
| SR           | 0.834401 | 0.818852  | 0.850596 | 907.0   |
| macro avg    | 0.821426 | 0.822323  | 0.820949 | 4026.0  |
| micro avg    | 0.831940 | 0.831940  | 0.831940 | 4026.0  |
| weighted avg | 0.831502 | 0.831436  | 0.831940 | 4026.0  |

The result of Model Number:Dataset Number:Featuregroup Number:Rescale of 19 : 0 : 6 :  
1

|              | f1-score | precision | recall   | support |
|--------------|----------|-----------|----------|---------|
| AFIB         | 0.888847 | 0.906678  | 0.871881 | 204.0   |
| GSVT         | 0.909447 | 0.899993  | 0.919149 | 300.0   |
| SB           | 0.926266 | 0.922663  | 0.929901 | 892.0   |
| SR           | 0.916533 | 0.920357  | 0.912762 | 681.0   |
| macro avg    | 0.910273 | 0.912423  | 0.908423 | 2077.0  |
| micro avg    | 0.917030 | 0.917030  | 0.917030 | 2077.0  |
| weighted avg | 0.916970 | 0.917063  | 0.917030 | 2077.0  |

The result of Model Number:Dataset Number:Featuregroup Number:Rescale of 19 : 0 : 7 :  
0

|              | f1-score | precision | recall   | support |
|--------------|----------|-----------|----------|---------|
| AFIB         | 0.850000 | 0.858252  | 0.842432 | 204.0   |
| GSVT         | 0.875480 | 0.871342  | 0.879889 | 300.0   |
| SB           | 0.893209 | 0.892212  | 0.894209 | 892.0   |
| SR           | 0.885349 | 0.886266  | 0.884439 | 681.0   |
| macro avg    | 0.876010 | 0.877018  | 0.875242 | 2077.0  |
| micro avg    | 0.883852 | 0.883852  | 0.883852 | 2077.0  |
| weighted avg | 0.883827 | 0.883913  | 0.883852 | 2077.0  |

The result of Model Number:Dataset Number:Featuregroup Number:Rescale of 19 : 0 : 7 :  
1

|              | f1-score | precision | recall   | support |
|--------------|----------|-----------|----------|---------|
| AFIB         | 0.736668 | 0.731851  | 0.741614 | 875.0   |
| GSVT         | 0.758564 | 0.765018  | 0.752318 | 691.0   |
| SB           | 0.807593 | 0.805834  | 0.809361 | 1553.0  |
| SR           | 0.787912 | 0.791075  | 0.784785 | 907.0   |
| macro avg    | 0.772684 | 0.773445  | 0.772020 | 4026.0  |
| micro avg    | 0.779310 | 0.779310  | 0.779310 | 4026.0  |
| weighted avg | 0.779329 | 0.779424  | 0.779310 | 4026.0  |

The result of Model Number:Dataset Number:Featuregroup Number:Rescale of 19 : 0 : 8 :  
0

f1-score precision recall support  
AFIB 0.641109 0.634183 0.729795 204.0  
GSVT 0.767045 0.761069 0.773183 300.0  
SB 0.625982 0.624673 0.627298 892.0  
SR 0.776232 0.776014 0.776460 681.0  
macro avg 0.702592 0.698985 0.726684 2077.0  
micro avg 0.707343 0.707343 0.707343 2077.0  
weighted avg 0.697106 0.694929 0.707343 2077.0  
The result of Model Number:Dataset Number:Featuregroup Number:Rescale of 19 : 0 : 8 :  
1

f1-score precision recall support  
AFIB 0.621806 0.699165 0.560408 204.0  
GSVT 0.737727 0.721974 0.754216 300.0  
SB 0.787537 0.783523 0.791597 892.0  
SR 0.769869 0.760120 0.779922 681.0  
macro avg 0.729235 0.741195 0.721535 2077.0  
micro avg 0.759662 0.759662 0.759662 2077.0  
weighted avg 0.758272 0.758674 0.759662 2077.0  
The result of Model Number:Dataset Number:Featuregroup Number:Rescale of 19 : 0 : 9 :  
0

f1-score precision recall support  
AFIB 0.803569 0.779552 0.856814 875.0  
GSVT 0.688138 0.673069 0.704153 691.0  
SB 0.912733 0.905297 0.920536 1553.0  
SR 0.856275 0.892226 0.824717 907.0  
macro avg 0.815179 0.812536 0.826555 4026.0  
micro avg 0.847961 0.847961 0.847961 4026.0  
weighted avg 0.837741 0.835165 0.847961 4026.0  
The result of Model Number:Dataset Number:Featuregroup Number:Rescale of 19 : 0 : 9 :  
1

f1-score precision recall support  
AFIB 0.823795 0.829774 0.817961 875.0  
GSVT 0.841866 0.834041 0.849902 691.0  
SB 0.904759 0.899297 0.910293 1553.0  
SR 0.875106 0.884878 0.865552 907.0  
macro avg 0.861382 0.861997 0.860927 4026.0  
micro avg 0.869781 0.869781 0.869781 4026.0  
weighted avg 0.869688 0.869738 0.869781 4026.0  
The result of Model Number:Dataset Number:Featuregroup Number:Rescale of 19 : 0 :  
10 : 0

f1-score precision recall support  
AFIB 0.801922 0.835838 0.770918 204.0  
GSVT 0.738512 0.739805 0.748302 300.0  
SB 0.795077 0.757200 0.837714 892.0

SR 0.702887 0.759499 0.655400 681.0  
macro avg 0.759599 0.773086 0.753083 2077.0  
micro avg 0.758462 0.758462 0.758462 2077.0  
weighted avg 0.757352 0.763165 0.758462 2077.0  
The result of Model Number:Dataset Number:Featuregroup Number:Rescale of 19 : 0 :  
10 : 1

f1-score precision recall support  
AFIB 0.668408 0.664198 0.752915 204.0  
GSVT 0.814800 0.810609 0.819171 300.0  
SB 0.838000 0.834013 0.842034 892.0  
SR 0.657316 0.659482 0.655561 681.0  
macro avg 0.744631 0.742075 0.767421 2077.0  
micro avg 0.768839 0.768839 0.768839 2077.0  
weighted avg 0.758750 0.756729 0.768839 2077.0

The result of Model Number:Dataset Number:Featuregroup Number:Rescale of 19 : 1 : 0 :  
0

f1-score precision recall support  
AFIB 0.671119 0.663203 0.679260 875.0  
GSVT 0.682488 0.686806 0.678248 691.0  
SB 0.727664 0.726685 0.728648 1553.0  
SR 0.709787 0.716511 0.703212 907.0  
macro avg 0.697764 0.698301 0.697342 4026.0  
micro avg 0.703533 0.703533 0.703533 4026.0  
weighted avg 0.703593 0.703752 0.703533 4026.0

The result of Model Number:Dataset Number:Featuregroup Number:Rescale of 19 : 1 : 0 :  
1

f1-score precision recall support  
AFIB 0.678699 0.670657 0.686994 875.0  
GSVT 0.688359 0.695014 0.681898 691.0  
SB 0.730579 0.727783 0.733401 1553.0  
SR 0.713546 0.721778 0.705520 907.0  
macro avg 0.702796 0.703808 0.701953 4026.0  
micro avg 0.708194 0.708194 0.708194 4026.0  
weighted avg 0.708220 0.708390 0.708194 4026.0

The result of Model Number:Dataset Number:Featuregroup Number:Rescale of 19 : 1 : 1 :  
0

f1-score precision recall support  
AFIB 0.776769 0.795409 0.759336 204.0  
GSVT 0.804388 0.799726 0.809203 300.0  
SB 0.821568 0.818554 0.824606 892.0  
SR 0.814428 0.815032 0.813834 681.0  
macro avg 0.804288 0.807180 0.801745 2077.0  
micro avg 0.812439 0.812439 0.812439 2077.0  
weighted avg 0.812345 0.812407 0.812439 2077.0

The result of Model Number:Dataset Number:Featuregroup Number:Rescale of 19 : 1 : 1 : 1

|              | f1-score | precision | recall   | support |
|--------------|----------|-----------|----------|---------|
| AFIB         | 0.780296 | 0.784389  | 0.776292 | 875.0   |
| GSVT         | 0.796612 | 0.795181  | 0.798105 | 691.0   |
| SB           | 0.864984 | 0.858351  | 0.871723 | 1553.0  |
| SR           | 0.834467 | 0.842819  | 0.826283 | 907.0   |
| macro avg    | 0.819090 | 0.820185  | 0.818101 | 4026.0  |
| micro avg    | 0.828110 | 0.828110  | 0.828110 | 4026.0  |
| weighted avg | 0.827968 | 0.827935  | 0.828110 | 4026.0  |

The result of Model Number:Dataset Number:Featuregroup Number:Rescale of 19 : 1 : 2 : 0

|              | f1-score | precision | recall   | support |
|--------------|----------|-----------|----------|---------|
| AFIB         | 0.780747 | 0.779491  | 0.782326 | 875.0   |
| GSVT         | 0.798951 | 0.794786  | 0.803205 | 691.0   |
| SB           | 0.835344 | 0.828267  | 0.842550 | 1553.0  |
| SR           | 0.803456 | 0.821318  | 0.786625 | 907.0   |
| macro avg    | 0.804624 | 0.805965  | 0.803677 | 4026.0  |
| micro avg    | 0.810109 | 0.810109  | 0.810109 | 4026.0  |
| weighted avg | 0.810048 | 0.810354  | 0.810109 | 4026.0  |

The result of Model Number:Dataset Number:Featuregroup Number:Rescale of 19 : 1 : 2 : 1

|              | f1-score | precision | recall   | support |
|--------------|----------|-----------|----------|---------|
| AFIB         | 0.883544 | 0.926377  | 0.844594 | 204.0   |
| GSVT         | 0.920341 | 0.908315  | 0.932876 | 300.0   |
| SB           | 0.945129 | 0.937942  | 0.952440 | 892.0   |
| SR           | 0.918813 | 0.921559  | 0.916125 | 681.0   |
| macro avg    | 0.916957 | 0.923548  | 0.911509 | 2077.0  |
| micro avg    | 0.927115 | 0.927115  | 0.927115 | 2077.0  |
| weighted avg | 0.926871 | 0.927155  | 0.927115 | 2077.0  |

The result of Model Number:Dataset Number:Featuregroup Number:Rescale of 19 : 1 : 3 : 0

|              | f1-score | precision | recall   | support |
|--------------|----------|-----------|----------|---------|
| AFIB         | 0.797715 | 0.813787  | 0.782777 | 204.0   |
| GSVT         | 0.823311 | 0.816699  | 0.830190 | 300.0   |
| SB           | 0.841135 | 0.840288  | 0.841984 | 892.0   |
| SR           | 0.833467 | 0.832989  | 0.833956 | 681.0   |
| macro avg    | 0.823907 | 0.825941  | 0.822227 | 2077.0  |
| micro avg    | 0.831833 | 0.831833  | 0.831833 | 2077.0  |
| weighted avg | 0.831782 | 0.831885  | 0.831833 | 2077.0  |

The result of Model Number:Dataset Number:Featuregroup Number:Rescale of 19 : 1 : 3 : 1

|      | f1-score | precision | recall   | support |
|------|----------|-----------|----------|---------|
| AFIB | 0.685627 | 0.675379  | 0.696215 | 875.0   |

GSVT 0.698772 0.704748 0.692908 691.0  
SB 0.746622 0.744051 0.749216 1553.0  
SR 0.724769 0.735579 0.714297 907.0  
macro avg 0.713947 0.714939 0.713159 4026.0  
micro avg 0.720166 0.720166 0.720166 4026.0  
weighted avg 0.720230 0.720472 0.720166 4026.0  
The result of Model Number:Dataset Number:Featuregroup Number:Rescale of 19 : 1 : 4 :  
0

f1-score precision recall support  
AFIB 0.816791 0.814147 0.819478 875.0  
GSVT 0.826263 0.828830 0.823793 691.0  
SB 0.871841 0.869944 0.873750 1553.0  
SR 0.855764 0.859801 0.851796 907.0  
macro avg 0.842665 0.843180 0.842204 4026.0  
micro avg 0.848435 0.848435 0.848435 4026.0  
weighted avg 0.848432 0.848475 0.848435 4026.0  
The result of Model Number:Dataset Number:Featuregroup Number:Rescale of 19 : 1 : 4 :  
1

f1-score precision recall support  
AFIB 0.698719 0.711577 0.686673 204.0  
GSVT 0.724498 0.718430 0.730795 300.0  
SB 0.738102 0.736865 0.739343 892.0  
SR 0.731585 0.732235 0.730941 681.0  
macro avg 0.723226 0.724777 0.721938 2077.0  
micro avg 0.730180 0.730180 0.730180 2077.0  
weighted avg 0.730132 0.730201 0.730180 2077.0  
The result of Model Number:Dataset Number:Featuregroup Number:Rescale of 19 : 1 : 5 :  
0

f1-score precision recall support  
AFIB 0.846915 0.858131 0.836117 204.0  
GSVT 0.872473 0.869324 0.875664 300.0  
SB 0.883340 0.880591 0.886110 892.0  
SR 0.873715 0.875398 0.872063 681.0  
macro avg 0.869111 0.870861 0.867488 2077.0  
micro avg 0.875085 0.875085 0.875085 2077.0  
weighted avg 0.875037 0.875055 0.875085 2077.0  
The result of Model Number:Dataset Number:Featuregroup Number:Rescale of 19 : 1 : 5 :  
1

f1-score precision recall support  
AFIB 0.754318 0.753639 0.755071 875.0  
GSVT 0.767386 0.760360 0.774603 691.0  
SB 0.805280 0.798200 0.812487 1553.0  
SR 0.767368 0.786339 0.749358 907.0  
macro avg 0.773588 0.774634 0.772880 4026.0

micro avg 0.779284 0.779284 0.779284 4026.0  
weighted avg 0.779159 0.779348 0.779284 4026.0  
The result of Model Number:Dataset Number:Featuregroup Number:Rescale of 19 : 1 : 6 :  
0

|              | f1-score | precision | recall   | support |
|--------------|----------|-----------|----------|---------|
| AFIB         | 0.683172 | 0.750146  | 0.627844 | 204.0   |
| GSVT         | 0.801541 | 0.790737  | 0.812772 | 300.0   |
| SB           | 0.850986 | 0.848147  | 0.853847 | 892.0   |
| SR           | 0.828870 | 0.817757  | 0.840310 | 681.0   |
| macro avg    | 0.791142 | 0.801697  | 0.783693 | 2077.0  |
| micro avg    | 0.821278 | 0.821278  | 0.821278 | 2077.0  |
| weighted avg | 0.820110 | 0.820265  | 0.821278 | 2077.0  |

The result of Model Number:Dataset Number:Featuregroup Number:Rescale of 19 : 1 : 6 :  
1

|              | f1-score | precision | recall   | support |
|--------------|----------|-----------|----------|---------|
| AFIB         | 0.870292 | 0.894284  | 0.847729 | 204.0   |
| GSVT         | 0.893454 | 0.876914  | 0.910714 | 300.0   |
| SB           | 0.907944 | 0.899456  | 0.916596 | 892.0   |
| SR           | 0.885122 | 0.897147  | 0.873430 | 681.0   |
| macro avg    | 0.889203 | 0.891950  | 0.887117 | 2077.0  |
| micro avg    | 0.894829 | 0.894829  | 0.894829 | 2077.0  |
| weighted avg | 0.894670 | 0.894935  | 0.894829 | 2077.0  |

The result of Model Number:Dataset Number:Featuregroup Number:Rescale of 19 : 1 : 7 :  
0

|              | f1-score | precision | recall   | support |
|--------------|----------|-----------|----------|---------|
| AFIB         | 0.812777 | 0.813502  | 0.812136 | 875.0   |
| GSVT         | 0.827665 | 0.829836  | 0.825644 | 691.0   |
| SB           | 0.878577 | 0.872727  | 0.884515 | 1553.0  |
| SR           | 0.861459 | 0.869324  | 0.853766 | 907.0   |
| macro avg    | 0.845119 | 0.846347  | 0.844015 | 4026.0  |
| micro avg    | 0.851753 | 0.851753  | 0.851753 | 4026.0  |
| weighted avg | 0.851681 | 0.851727  | 0.851753 | 4026.0  |

The result of Model Number:Dataset Number:Featuregroup Number:Rescale of 19 : 1 : 7 :  
1

|              | f1-score | precision | recall   | support |
|--------------|----------|-----------|----------|---------|
| AFIB         | 0.713658 | 0.718995  | 0.708427 | 204.0   |
| GSVT         | 0.731893 | 0.728031  | 0.735798 | 300.0   |
| SB           | 0.744245 | 0.743249  | 0.745245 | 892.0   |
| SR           | 0.737690 | 0.739104  | 0.736283 | 681.0   |
| macro avg    | 0.731871 | 0.732345  | 0.731438 | 2077.0  |
| micro avg    | 0.737326 | 0.737326  | 0.737326 | 2077.0  |
| weighted avg | 0.737307 | 0.737310  | 0.737326 | 2077.0  |

The result of Model Number:Dataset Number:Featuregroup Number:Rescale of 19 : 1 : 8 :  
0

f1-score precision recall support  
AFIB 0.690010 0.747612 0.642025 204.0  
GSVT 0.740116 0.730810 0.749964 300.0  
SB 0.759010 0.748377 0.770039 892.0  
SR 0.738306 0.741765 0.735239 681.0  
macro avg 0.731861 0.742141 0.724317 2077.0  
micro avg 0.743156 0.743156 0.743156 2077.0  
weighted avg 0.742716 0.743596 0.743156 2077.0  
The result of Model Number:Dataset Number:Featuregroup Number:Rescale of 19 : 1 : 8 :  
1

f1-score precision recall support  
AFIB 0.777658 0.793809 0.762329 875.0  
GSVT 0.758371 0.732031 0.820276 691.0  
SB 0.893859 0.889828 0.897941 1553.0  
SR 0.679554 0.668582 0.690952 907.0  
macro avg 0.777360 0.771063 0.792875 4026.0  
micro avg 0.808506 0.808506 0.808506 4026.0  
weighted avg 0.797070 0.792033 0.808506 4026.0  
The result of Model Number:Dataset Number:Featuregroup Number:Rescale of 19 : 1 : 9 :  
0

f1-score precision recall support  
AFIB 0.848708 0.849311 0.848122 875.0  
GSVT 0.860144 0.861840 0.858529 691.0  
SB 0.913618 0.910582 0.916677 1553.0  
SR 0.892150 0.895467 0.888888 907.0  
macro avg 0.878655 0.879300 0.878054 4026.0  
micro avg 0.885537 0.885537 0.885537 4026.0  
weighted avg 0.885496 0.885494 0.885537 4026.0  
The result of Model Number:Dataset Number:Featuregroup Number:Rescale of 19 : 1 : 9 :  
1

f1-score precision recall support  
AFIB 0.810692 0.825279 0.796851 204.0  
GSVT 0.828981 0.817325 0.841111 300.0  
SB 0.841736 0.831791 0.851926 892.0  
SR 0.824807 0.839492 0.810637 681.0  
macro avg 0.826554 0.828472 0.825132 2077.0  
micro avg 0.831417 0.831417 0.831417 2077.0  
weighted avg 0.831294 0.831587 0.831417 2077.0  
The result of Model Number:Dataset Number:Featuregroup Number:Rescale of 19 : 1 :  
10 : 0

f1-score precision recall support  
AFIB 0.839135 0.829054 0.849495 875.0  
GSVT 0.855275 0.862200 0.848466 691.0  
SB 0.911656 0.908167 0.915177 1553.0



SR 0.890281 0.901665 0.879193 907.0  
macro avg 0.874087 0.875271 0.873083 4026.0  
micro avg 0.881345 0.881345 0.881345 4026.0  
weighted avg 0.881402 0.881618 0.881345 4026.0  
The result of Model Number:Dataset Number:Featuregroup Number:Rescale of 19 : 1 :  
10 : 1

f1-score precision recall support  
AFIB 0.675533 0.671751 0.679390 875.0  
GSVT 0.681034 0.685052 0.677105 691.0  
SB 0.717413 0.715168 0.719675 1553.0  
SR 0.703210 0.707863 0.698635 907.0  
macro avg 0.694297 0.694958 0.693701 4026.0  
micro avg 0.698873 0.698873 0.698873 4026.0  
weighted avg 0.698867 0.698917 0.698873 4026.0

The result of Model Number:Dataset Number:Featuregroup Number:Rescale of 20 : 0 : 0 :  
0

f1-score precision recall support  
AFIB 0.703792 0.722389 0.686197 204.0  
GSVT 0.723092 0.717086 0.729333 300.0  
SB 0.743018 0.740291 0.745766 892.0  
SR 0.731513 0.732400 0.730649 681.0  
macro avg 0.725354 0.728041 0.722986 2077.0  
micro avg 0.732585 0.732585 0.732585 2077.0  
weighted avg 0.732515 0.732594 0.732585 2077.0

The result of Model Number:Dataset Number:Featuregroup Number:Rescale of 20 : 0 : 0 :  
1

f1-score precision recall support  
AFIB 0.771219 0.789381 0.753940 875.0  
GSVT 0.812979 0.815032 0.810989 691.0  
SB 0.884129 0.880464 0.887828 1553.0  
SR 0.841255 0.828006 0.854974 907.0  
macro avg 0.827395 0.828221 0.826933 4026.0  
micro avg 0.838140 0.838140 0.838140 4026.0  
weighted avg 0.837719 0.837620 0.838140 4026.0

The result of Model Number:Dataset Number:Featuregroup Number:Rescale of 20 : 0 : 1 :  
0

f1-score precision recall support  
AFIB 0.686877 0.696601 0.677985 204.0  
GSVT 0.701138 0.688229 0.714669 300.0  
SB 0.716082 0.708164 0.724190 892.0  
SR 0.701033 0.715311 0.687355 681.0  
macro avg 0.701282 0.702076 0.701050 2077.0  
micro avg 0.706199 0.706199 0.706199 2077.0  
weighted avg 0.706120 0.706492 0.706199 2077.0

The result of Model Number:Dataset Number:Featuregroup Number:Rescale of 20 : 0 : 1 :  
1

|              | f1-score | precision | recall   | support |
|--------------|----------|-----------|----------|---------|
| AFIB         | 0.852786 | 0.840796  | 0.865164 | 875.0   |
| GSVT         | 0.871146 | 0.877683  | 0.864729 | 691.0   |
| SB           | 0.926364 | 0.923642  | 0.929107 | 1553.0  |
| SR           | 0.903546 | 0.916046  | 0.891397 | 907.0   |
| macro avg    | 0.888461 | 0.889542  | 0.887599 | 4026.0  |
| micro avg    | 0.895665 | 0.895665  | 0.895665 | 4026.0  |
| weighted avg | 0.895755 | 0.896037  | 0.895665 | 4026.0  |

The result of Model Number:Dataset Number:Featuregroup Number:Rescale of 20 : 0 : 2 :  
0

|              | f1-score | precision | recall   | support |
|--------------|----------|-----------|----------|---------|
| AFIB         | 0.770226 | 0.780641  | 0.760407 | 204.0   |
| GSVT         | 0.799482 | 0.798184  | 0.800812 | 300.0   |
| SB           | 0.816844 | 0.815756  | 0.817942 | 892.0   |
| SR           | 0.808494 | 0.807459  | 0.809562 | 681.0   |
| macro avg    | 0.798761 | 0.800510  | 0.797181 | 2077.0  |
| micro avg    | 0.807069 | 0.807069  | 0.807069 | 2077.0  |
| weighted avg | 0.807020 | 0.807048  | 0.807069 | 2077.0  |

The result of Model Number:Dataset Number:Featuregroup Number:Rescale of 20 : 0 : 2 :  
1

|              | f1-score | precision | recall   | support |
|--------------|----------|-----------|----------|---------|
| AFIB         | 0.761790 | 0.761591  | 0.762063 | 875.0   |
| GSVT         | 0.777704 | 0.774763  | 0.780750 | 691.0   |
| SB           | 0.827983 | 0.824245  | 0.831768 | 1553.0  |
| SR           | 0.800078 | 0.809219  | 0.791172 | 907.0   |
| macro avg    | 0.791889 | 0.792455  | 0.791438 | 4026.0  |
| micro avg    | 0.798716 | 0.798716  | 0.798716 | 4026.0  |
| weighted avg | 0.798681 | 0.798750  | 0.798716 | 4026.0  |

The result of Model Number:Dataset Number:Featuregroup Number:Rescale of 20 : 0 : 3 :  
0

|              | f1-score | precision | recall   | support |
|--------------|----------|-----------|----------|---------|
| AFIB         | 0.757947 | 0.781291  | 0.736109 | 204.0   |
| GSVT         | 0.777283 | 0.767768  | 0.787122 | 300.0   |
| SB           | 0.798396 | 0.793652  | 0.803223 | 892.0   |
| SR           | 0.784938 | 0.788809  | 0.781135 | 681.0   |
| macro avg    | 0.779641 | 0.782880  | 0.776897 | 2077.0  |
| micro avg    | 0.787063 | 0.787063  | 0.787063 | 2077.0  |
| weighted avg | 0.786961 | 0.787111  | 0.787063 | 2077.0  |

The result of Model Number:Dataset Number:Featuregroup Number:Rescale of 20 : 0 : 3 :  
1

|      | f1-score | precision | recall   | support |
|------|----------|-----------|----------|---------|
| AFIB | 0.748878 | 0.738505  | 0.759576 | 875.0   |

GSVT 0.765487 0.771682 0.759395 691.0  
SB 0.812555 0.810221 0.814909 1553.0  
SR 0.792789 0.803107 0.782740 907.0  
macro avg 0.779927 0.780879 0.779155 4026.0  
micro avg 0.786108 0.786108 0.786108 4026.0  
weighted avg 0.786184 0.786417 0.786108 4026.0  
The result of Model Number:Dataset Number:Featuregroup Number:Rescale of 20 : 0 : 4 :  
0

f1-score precision recall support

AFIB 0.815438 0.819898 0.811054 875.0  
GSVT 0.811552 0.804709 0.818594 691.0  
SB 0.853550 0.845467 0.861793 1553.0  
SR 0.821783 0.837113 0.807017 907.0  
macro avg 0.825581 0.826797 0.824614 4026.0  
micro avg 0.831011 0.831011 0.831011 4026.0  
weighted avg 0.830902 0.831032 0.831011 4026.0

The result of Model Number:Dataset Number:Featuregroup Number:Rescale of 20 : 0 : 4 :  
1

f1-score precision recall support

AFIB 0.812504 0.791160 0.863369 875.0  
GSVT 0.781621 0.739814 0.891032 691.0  
SB 0.740627 0.735946 0.745389 1553.0  
SR 0.719402 0.731797 0.707620 907.0  
macro avg 0.763539 0.749679 0.801853 4026.0  
micro avg 0.787519 0.787519 0.787519 4026.0  
weighted avg 0.758503 0.747675 0.787519 4026.0

The result of Model Number:Dataset Number:Featuregroup Number:Rescale of 20 : 0 : 5 :  
0

f1-score precision recall support

AFIB 0.732917 0.746405 0.720282 204.0  
GSVT 0.759958 0.753593 0.766563 300.0  
SB 0.774228 0.772931 0.775530 892.0  
SR 0.767392 0.768074 0.766716 681.0  
macro avg 0.758624 0.760251 0.757273 2077.0  
micro avg 0.765919 0.765919 0.765919 2077.0  
weighted avg 0.765868 0.765940 0.765919 2077.0

The result of Model Number:Dataset Number:Featuregroup Number:Rescale of 20 : 0 : 5 :  
1

f1-score precision recall support

AFIB 0.831774 0.824418 0.839297 875.0  
GSVT 0.756227 0.732348 0.841317 691.0  
SB 0.681779 0.654602 0.724280 1553.0  
SR 0.702673 0.709943 0.695595 907.0  
macro avg 0.743113 0.730328 0.775122 4026.0

micro avg 0.762903 0.762903 0.762903 4026.0  
weighted avg 0.731863 0.717321 0.762903 4026.0  
The result of Model Number:Dataset Number:Featuregroup Number:Rescale of 20 : 0 : 6 :  
0

f1-score precision recall support  
AFIB 0.822431 0.891087 0.765237 204.0  
GSVT 0.882152 0.871060 0.893891 300.0  
SB 0.904673 0.891999 0.917817 892.0  
SR 0.879995 0.884117 0.876339 681.0  
macro avg 0.872313 0.884566 0.863321 2077.0  
micro avg 0.885776 0.885776 0.885776 2077.0  
weighted avg 0.885251 0.886301 0.885776 2077.0

The result of Model Number:Dataset Number:Featuregroup Number:Rescale of 20 : 0 : 6 :  
1

f1-score precision recall support  
AFIB 0.799555 0.801192 0.798013 204.0  
GSVT 0.817141 0.813965 0.820400 300.0  
SB 0.835281 0.834167 0.836403 892.0  
SR 0.829146 0.831597 0.826712 681.0  
macro avg 0.820281 0.820230 0.820382 2077.0  
micro avg 0.827144 0.827144 0.827144 2077.0  
weighted avg 0.827141 0.827168 0.827144 2077.0

The result of Model Number:Dataset Number:Featuregroup Number:Rescale of 20 : 0 : 7 :  
0

f1-score precision recall support  
AFIB 0.772582 0.778633 0.766666 875.0  
GSVT 0.774620 0.764734 0.784813 691.0  
SB 0.812488 0.809230 0.815782 1553.0  
SR 0.795323 0.803130 0.787696 907.0  
macro avg 0.788753 0.788931 0.788739 4026.0  
micro avg 0.793464 0.793464 0.793464 4026.0  
weighted avg 0.793449 0.793569 0.793464 4026.0

The result of Model Number:Dataset Number:Featuregroup Number:Rescale of 20 : 0 : 7 :  
1

f1-score precision recall support  
AFIB 0.724947 0.697232 0.770548 875.0  
GSVT 0.751167 0.725243 0.786331 691.0  
SB 0.836940 0.822167 0.853173 1553.0  
SR 0.708869 0.852374 0.612013 907.0  
macro avg 0.755481 0.774254 0.755516 4026.0  
micro avg 0.769413 0.769413 0.769413 4026.0  
weighted avg 0.769026 0.785184 0.769413 4026.0

The result of Model Number:Dataset Number:Featuregroup Number:Rescale of 20 : 0 : 8 :  
0

f1-score precision recall support  
AFIB 0.797388 0.776440 0.847306 875.0  
GSVT 0.767079 0.726050 0.874455 691.0  
SB 0.726847 0.722254 0.731521 1553.0  
SR 0.706017 0.718182 0.694455 907.0  
macro avg 0.749333 0.735731 0.786934 4026.0  
micro avg 0.772867 0.772867 0.772867 4026.0  
weighted avg 0.744391 0.733765 0.772867 4026.0  
The result of Model Number:Dataset Number:Featuregroup Number:Rescale of 20 : 0 : 8 :  
1

f1-score precision recall support  
AFIB 0.703754 0.716815 0.691336 204.0  
GSVT 0.719229 0.715458 0.723055 300.0  
SB 0.730711 0.728114 0.733332 892.0  
SR 0.723189 0.724492 0.721921 681.0  
macro avg 0.719221 0.721219 0.717411 2077.0  
micro avg 0.723981 0.723981 0.723981 2077.0  
weighted avg 0.723939 0.723988 0.723981 2077.0  
The result of Model Number:Dataset Number:Featuregroup Number:Rescale of 20 : 0 : 9 :  
0

f1-score precision recall support  
AFIB 0.663122 0.656908 0.669480 875.0  
GSVT 0.674268 0.679675 0.669012 691.0  
SB 0.714759 0.712022 0.717520 1553.0  
SR 0.698766 0.705859 0.691833 907.0  
macro avg 0.687729 0.688616 0.686961 4026.0  
micro avg 0.692966 0.692966 0.692966 4026.0  
weighted avg 0.692984 0.693103 0.692966 4026.0  
The result of Model Number:Dataset Number:Featuregroup Number:Rescale of 20 : 0 : 9 :  
1

f1-score precision recall support  
AFIB 0.737400 0.746871 0.728203 875.0  
GSVT 0.745558 0.739529 0.751806 691.0  
SB 0.797534 0.795136 0.799948 1553.0  
SR 0.777785 0.777458 0.778123 907.0  
macro avg 0.764569 0.764749 0.764520 4026.0  
micro avg 0.771176 0.771176 0.771176 4026.0  
weighted avg 0.771095 0.771120 0.771176 4026.0  
The result of Model Number:Dataset Number:Featuregroup Number:Rescale of 20 : 0 :  
10 : 0

f1-score precision recall support  
AFIB 0.842057 0.855400 0.829235 204.0  
GSVT 0.863701 0.856351 0.871182 300.0  
SB 0.878613 0.876655 0.880583 892.0

SR 0.870288 0.872222 0.868379 681.0  
macro avg 0.863664 0.865157 0.862345 2077.0  
micro avg 0.870180 0.870180 0.870180 2077.0  
weighted avg 0.870139 0.870181 0.870180 2077.0  
The result of Model Number:Dataset Number:Featuregroup Number:Rescale of 20 : 0 :  
10 : 1

f1-score precision recall support  
AFIB 0.826863 0.826812 0.826964 875.0  
GSVT 0.828652 0.824172 0.833195 691.0  
SB 0.868240 0.862463 0.874106 1553.0  
SR 0.845185 0.859052 0.831790 907.0  
macro avg 0.842235 0.843125 0.841514 4026.0  
micro avg 0.847306 0.847306 0.847306 4026.0  
weighted avg 0.847259 0.847374 0.847306 4026.0  
The result of Model Number:Dataset Number:Featuregroup Number:Rescale of 20 : 1 : 0 :  
0

f1-score precision recall support  
AFIB 0.818687 0.818425 0.818992 875.0  
GSVT 0.830888 0.820207 0.841947 691.0  
SB 0.878863 0.876952 0.880787 1553.0  
SR 0.854547 0.867073 0.842391 907.0  
macro avg 0.845746 0.845664 0.846029 4026.0  
micro avg 0.852040 0.852040 0.852040 4026.0  
weighted avg 0.852072 0.852267 0.852040 4026.0  
The result of Model Number:Dataset Number:Featuregroup Number:Rescale of 20 : 1 : 0 :  
1

f1-score precision recall support  
AFIB 0.808047 0.820298 0.796177 204.0  
GSVT 0.821040 0.814119 0.828123 300.0  
SB 0.839252 0.836545 0.841979 892.0  
SR 0.830243 0.833327 0.827204 681.0  
macro avg 0.824646 0.826072 0.823371 2077.0  
micro avg 0.830635 0.830635 0.830635 2077.0  
weighted avg 0.830603 0.830655 0.830635 2077.0  
The result of Model Number:Dataset Number:Featuregroup Number:Rescale of 20 : 1 : 1 :  
0

f1-score precision recall support  
AFIB 0.637102 0.707053 0.579899 204.0  
GSVT 0.743903 0.734603 0.753588 300.0  
SB 0.791477 0.787438 0.795558 892.0  
SR 0.772935 0.762129 0.784056 681.0  
macro avg 0.736354 0.747806 0.728275 2077.0  
micro avg 0.764543 0.764543 0.764543 2077.0  
weighted avg 0.763363 0.763613 0.764543 2077.0

The result of Model Number:Dataset Number:Featuregroup Number:Rescale of 20 : 1 : 1 : 1

|              | f1-score | precision | recall   | support |
|--------------|----------|-----------|----------|---------|
| AFIB         | 0.661750 | 0.672496  | 0.651378 | 875.0   |
| GSVT         | 0.703791 | 0.705996  | 0.701641 | 691.0   |
| SB           | 0.765689 | 0.763050  | 0.768350 | 1553.0  |
| SR           | 0.724884 | 0.716810  | 0.733186 | 907.0   |
| macro avg    | 0.714028 | 0.714588  | 0.713639 | 4026.0  |
| micro avg    | 0.723556 | 0.723556  | 0.723556 | 4026.0  |
| weighted avg | 0.723283 | 0.723160  | 0.723556 | 4026.0  |

The result of Model Number:Dataset Number:Featuregroup Number:Rescale of 20 : 1 : 2 : 0

|              | f1-score | precision | recall   | support |
|--------------|----------|-----------|----------|---------|
| AFIB         | 0.678332 | 0.684918  | 0.672293 | 204.0   |
| GSVT         | 0.698666 | 0.695363  | 0.702185 | 300.0   |
| SB           | 0.712814 | 0.712019  | 0.713613 | 892.0   |
| SR           | 0.706542 | 0.707274  | 0.705816 | 681.0   |
| macro avg    | 0.699089 | 0.699893  | 0.698476 | 2077.0  |
| micro avg    | 0.705347 | 0.705347  | 0.705347 | 2077.0  |
| weighted avg | 0.705327 | 0.705395  | 0.705347 | 2077.0  |

The result of Model Number:Dataset Number:Featuregroup Number:Rescale of 20 : 1 : 2 : 1

|              | f1-score | precision | recall   | support |
|--------------|----------|-----------|----------|---------|
| AFIB         | 0.848771 | 0.856364  | 0.841417 | 875.0   |
| GSVT         | 0.864982 | 0.848534  | 0.882245 | 691.0   |
| SB           | 0.918106 | 0.910152  | 0.926203 | 1553.0  |
| SR           | 0.880397 | 0.900639  | 0.861083 | 907.0   |
| macro avg    | 0.878064 | 0.878922  | 0.877737 | 4026.0  |
| micro avg    | 0.885561 | 0.885561  | 0.885561 | 4026.0  |
| weighted avg | 0.885423 | 0.885743  | 0.885561 | 4026.0  |

The result of Model Number:Dataset Number:Featuregroup Number:Rescale of 20 : 1 : 3 : 0

|              | f1-score | precision | recall   | support |
|--------------|----------|-----------|----------|---------|
| AFIB         | 0.810925 | 0.801965  | 0.820104 | 875.0   |
| GSVT         | 0.825536 | 0.830619  | 0.820529 | 691.0   |
| SB           | 0.878625 | 0.877162  | 0.880096 | 1553.0  |
| SR           | 0.857231 | 0.865246  | 0.849384 | 907.0   |
| macro avg    | 0.843079 | 0.843748  | 0.842528 | 4026.0  |
| micro avg    | 0.849915 | 0.849915  | 0.849915 | 4026.0  |
| weighted avg | 0.849979 | 0.850146  | 0.849915 | 4026.0  |

The result of Model Number:Dataset Number:Featuregroup Number:Rescale of 20 : 1 : 3 : 1

|      | f1-score | precision | recall   | support |
|------|----------|-----------|----------|---------|
| AFIB | 0.738318 | 0.744433  | 0.831614 | 204.0   |

GSVT 0.800656 0.766387 0.903327 300.0  
SB 0.731028 0.728488 0.733589 892.0  
SR 0.723760 0.723897 0.723628 681.0  
macro avg 0.748440 0.740801 0.798039 2077.0  
micro avg 0.764468 0.764468 0.764468 2077.0  
weighted avg 0.739418 0.734023 0.764468 2077.0  
The result of Model Number:Dataset Number:Featuregroup Number:Rescale of 20 : 1 : 4 :  
0

f1-score precision recall support  
AFIB 0.708055 0.779968 0.648962 204.0  
GSVT 0.653884 0.699101 0.614467 300.0  
SB 0.711886 0.665168 0.765674 892.0  
SR 0.616149 0.648537 0.587011 681.0  
macro avg 0.672493 0.698193 0.654029 2077.0  
micro avg 0.673791 0.673791 0.673791 2077.0  
weighted avg 0.671742 0.675892 0.673791 2077.0  
The result of Model Number:Dataset Number:Featuregroup Number:Rescale of 20 : 1 : 4 :  
1

f1-score precision recall support  
AFIB 0.862056 0.881568 0.843499 204.0  
GSVT 0.884996 0.880663 0.889411 300.0  
SB 0.903101 0.900493 0.905731 892.0  
SR 0.897299 0.896911 0.897700 681.0  
macro avg 0.886863 0.889909 0.884085 2077.0  
micro avg 0.894628 0.894628 0.894628 2077.0  
weighted avg 0.894552 0.894596 0.894628 2077.0  
The result of Model Number:Dataset Number:Featuregroup Number:Rescale of 20 : 1 : 5 :  
0

f1-score precision recall support  
AFIB 0.645631 0.640823 0.650577 875.0  
GSVT 0.657672 0.660021 0.655380 691.0  
SB 0.697871 0.696218 0.699533 1553.0  
SR 0.681945 0.688085 0.675939 907.0  
macro avg 0.670780 0.671287 0.670357 4026.0  
micro avg 0.676000 0.676000 0.676000 4026.0  
weighted avg 0.676030 0.676134 0.676000 4026.0  
The result of Model Number:Dataset Number:Featuregroup Number:Rescale of 20 : 1 : 5 :  
1

f1-score precision recall support  
AFIB 0.700812 0.686659 0.715617 875.0  
GSVT 0.724047 0.735560 0.713046 691.0  
SB 0.770397 0.770354 0.770446 1553.0  
SR 0.751719 0.758568 0.745004 907.0  
macro avg 0.736744 0.737785 0.736028 4026.0



micro avg 0.742946 0.742946 0.742946 4026.0  
weighted avg 0.743111 0.743537 0.742946 4026.0  
The result of Model Number:Dataset Number:Featuregroup Number:Rescale of 20 : 1 : 6 :  
0

|              | f1-score | precision | recall   | support |
|--------------|----------|-----------|----------|---------|
| AFIB         | 0.666860 | 0.656819  | 0.682765 | 875.0   |
| GSVT         | 0.636731 | 0.634878  | 0.642163 | 691.0   |
| SB           | 0.679947 | 0.633602  | 0.739261 | 1553.0  |
| SR           | 0.503679 | 0.673269  | 0.417359 | 907.0   |
| macro avg    | 0.621804 | 0.649642  | 0.620387 | 4026.0  |
| micro avg    | 0.637797 | 0.637797  | 0.637797 | 4026.0  |
| weighted avg | 0.629975 | 0.647803  | 0.637797 | 4026.0  |

The result of Model Number:Dataset Number:Featuregroup Number:Rescale of 20 : 1 : 6 :  
1

|              | f1-score | precision | recall   | support |
|--------------|----------|-----------|----------|---------|
| AFIB         | 0.836383 | 0.836164  | 0.836683 | 875.0   |
| GSVT         | 0.853855 | 0.850627  | 0.857200 | 691.0   |
| SB           | 0.909058 | 0.904953  | 0.913213 | 1553.0  |
| SR           | 0.878421 | 0.888457  | 0.868643 | 907.0   |
| macro avg    | 0.869429 | 0.870050  | 0.868935 | 4026.0  |
| micro avg    | 0.876925 | 0.876925  | 0.876925 | 4026.0  |
| weighted avg | 0.876886 | 0.876962  | 0.876925 | 4026.0  |

The result of Model Number:Dataset Number:Featuregroup Number:Rescale of 20 : 1 : 7 :  
0

|              | f1-score | precision | recall   | support |
|--------------|----------|-----------|----------|---------|
| AFIB         | 0.779693 | 0.817023  | 0.745810 | 204.0   |
| GSVT         | 0.821227 | 0.812435  | 0.830241 | 300.0   |
| SB           | 0.838671 | 0.834037  | 0.843366 | 892.0   |
| SR           | 0.829197 | 0.828478  | 0.829931 | 681.0   |
| macro avg    | 0.817197 | 0.822993  | 0.812337 | 2077.0  |
| micro avg    | 0.827483 | 0.827483  | 0.827483 | 2077.0  |
| weighted avg | 0.827252 | 0.827423  | 0.827483 | 2077.0  |

The result of Model Number:Dataset Number:Featuregroup Number:Rescale of 20 : 1 : 7 :  
1

|              | f1-score | precision | recall   | support |
|--------------|----------|-----------|----------|---------|
| AFIB         | 0.787647 | 0.867644  | 0.721912 | 204.0   |
| GSVT         | 0.727388 | 0.777687  | 0.683540 | 300.0   |
| SB           | 0.791910 | 0.739939  | 0.851744 | 892.0   |
| SR           | 0.685411 | 0.721440  | 0.652997 | 681.0   |
| macro avg    | 0.748089 | 0.776678  | 0.727548 | 2077.0  |
| micro avg    | 0.749532 | 0.749532  | 0.749532 | 2077.0  |
| weighted avg | 0.747253 | 0.751869  | 0.749532 | 2077.0  |

The result of Model Number:Dataset Number:Featuregroup Number:Rescale of 20 : 1 : 8 :  
0

f1-score precision recall support  
AFIB 0.860547 0.878597 0.843246 204.0  
GSVT 0.880510 0.875300 0.885791 300.0  
SB 0.901976 0.899863 0.904099 892.0  
SR 0.894357 0.894100 0.894622 681.0  
macro avg 0.884347 0.886965 0.881940 2077.0  
micro avg 0.892371 0.892371 0.892371 2077.0  
weighted avg 0.892308 0.892337 0.892371 2077.0  
The result of Model Number:Dataset Number:Featuregroup Number:Rescale of 20 : 1 : 8 :  
1

f1-score precision recall support  
AFIB 0.770417 0.797163 0.745512 204.0  
GSVT 0.785189 0.776594 0.794074 300.0  
SB 0.806092 0.800304 0.811966 892.0  
SR 0.791696 0.795588 0.787855 681.0  
macro avg 0.788349 0.792412 0.784852 2077.0  
micro avg 0.794949 0.794949 0.794949 2077.0  
weighted avg 0.794849 0.795025 0.794949 2077.0  
The result of Model Number:Dataset Number:Featuregroup Number:Rescale of 20 : 1 : 9 :  
0

f1-score precision recall support  
AFIB 0.637802 0.707830 0.580536 204.0  
GSVT 0.744721 0.735410 0.754416 300.0  
SB 0.792346 0.788303 0.796432 892.0  
SR 0.773784 0.762966 0.784917 681.0  
macro avg 0.737163 0.748627 0.729075 2077.0  
micro avg 0.765383 0.765383 0.765383 2077.0  
weighted avg 0.764202 0.764452 0.765383 2077.0  
The result of Model Number:Dataset Number:Featuregroup Number:Rescale of 20 : 1 : 9 :  
1

f1-score precision recall support  
AFIB 0.157858 0.159516 0.156234 175.0  
GSVT 0.158113 0.156433 0.159829 138.2  
SB 0.166520 0.165882 0.167164 310.6  
SR 0.162667 0.163482 0.161859 181.4  
macro avg 0.161289 0.161328 0.161272 805.2  
micro avg 0.162334 0.162334 0.162334 805.2  
weighted avg 0.162326 0.162336 0.162334 805.2  
The result of Model Number:Dataset Number:Featuregroup Number:Rescale of 20 : 1 :  
10 : 0

f1-score precision recall support  
AFIB 0.628724 0.629779 0.644307 204.0  
GSVT 0.622813 0.646982 0.601188 300.0  
SB 0.660628 0.624399 0.701592 892.0

SR 0.572624 0.625469 0.529462 681.0  
macro avg 0.621197 0.631657 0.619137 2077.0  
micro avg 0.625026 0.625026 0.625026 2077.0  
weighted avg 0.623178 0.628540 0.625026 2077.0  
The result of Model Number:Dataset Number:Featuregroup Number:Rescale of 20 : 1 :  
10 : 1

f1-score precision recall support  
AFIB 0.667433 0.731673 0.613790 204.0  
GSVT 0.776226 0.768250 0.784514 300.0  
SB 0.822859 0.819659 0.826087 892.0  
SR 0.803794 0.792679 0.815239 681.0  
macro avg 0.767578 0.778065 0.759907 2077.0  
micro avg 0.795674 0.795674 0.795674 2077.0  
weighted avg 0.794607 0.794745 0.795674 2077.0

The result of Model Number:Dataset Number:Featuregroup Number:Rescale of 21 : 0 : 0 :  
0

f1-score precision recall support  
AFIB 0.648374 0.639258 0.657785 875.0  
GSVT 0.662333 0.667303 0.657454 691.0  
SB 0.704316 0.702246 0.706401 1553.0  
SR 0.686967 0.696471 0.677730 907.0  
macro avg 0.675497 0.676319 0.674842 4026.0  
micro avg 0.680975 0.680975 0.680975 4026.0  
weighted avg 0.681043 0.681258 0.680975 4026.0

The result of Model Number:Dataset Number:Featuregroup Number:Rescale of 21 : 0 : 0 :  
1

f1-score precision recall support  
AFIB 0.879993 0.919104 0.844197 204.0  
GSVT 0.916664 0.909468 0.923995 300.0  
SB 0.930667 0.923487 0.937967 892.0  
SR 0.920370 0.921890 0.918888 681.0  
macro avg 0.911923 0.918487 0.906262 2077.0  
micro avg 0.920483 0.920483 0.920483 2077.0  
weighted avg 0.920291 0.920508 0.920483 2077.0

The result of Model Number:Dataset Number:Featuregroup Number:Rescale of 21 : 0 : 1 :  
0

f1-score precision recall support  
AFIB 0.664577 0.666228 0.662979 875.0  
GSVT 0.676022 0.678053 0.674089 691.0  
SB 0.717138 0.712270 0.722077 1553.0  
SR 0.703491 0.708713 0.698372 907.0  
macro avg 0.690307 0.691316 0.689379 4026.0  
micro avg 0.695656 0.695656 0.695656 4026.0  
weighted avg 0.695583 0.695589 0.695656 4026.0

The result of Model Number:Dataset Number:Featuregroup Number:Rescale of 21 : 0 : 1 : 1

|              | f1-score | precision | recall   | support |
|--------------|----------|-----------|----------|---------|
| AFIB         | 0.748827 | 0.785129  | 0.715816 | 204.0   |
| GSVT         | 0.780014 | 0.769821  | 0.790638 | 300.0   |
| SB           | 0.801022 | 0.794931  | 0.807219 | 892.0   |
| SR           | 0.778719 | 0.781046  | 0.776440 | 681.0   |
| macro avg    | 0.777145 | 0.782732  | 0.772528 | 2077.0  |
| micro avg    | 0.785755 | 0.785755  | 0.785755 | 2077.0  |
| weighted avg | 0.785548 | 0.785789  | 0.785755 | 2077.0  |

The result of Model Number:Dataset Number:Featuregroup Number:Rescale of 21 : 0 : 2 : 0

|              | f1-score | precision | recall   | support |
|--------------|----------|-----------|----------|---------|
| AFIB         | 0.760609 | 0.760971  | 0.760357 | 875.0   |
| GSVT         | 0.780307 | 0.773553  | 0.787208 | 691.0   |
| SB           | 0.833371 | 0.827298  | 0.839541 | 1553.0  |
| SR           | 0.797768 | 0.813627  | 0.782557 | 907.0   |
| macro avg    | 0.793014 | 0.793862  | 0.792416 | 4026.0  |
| micro avg    | 0.800512 | 0.800512  | 0.800512 | 4026.0  |
| weighted avg | 0.800429 | 0.800578  | 0.800512 | 4026.0  |

The result of Model Number:Dataset Number:Featuregroup Number:Rescale of 21 : 0 : 2 : 1

|              | f1-score | precision | recall   | support |
|--------------|----------|-----------|----------|---------|
| AFIB         | 0.876719 | 0.895109  | 0.859093 | 204.0   |
| GSVT         | 0.897057 | 0.891749  | 0.902437 | 300.0   |
| SB           | 0.918927 | 0.916774  | 0.921090 | 892.0   |
| SR           | 0.911165 | 0.910903  | 0.911435 | 681.0   |
| macro avg    | 0.900967 | 0.903634  | 0.898514 | 2077.0  |
| micro avg    | 0.909141 | 0.909141  | 0.909141 | 2077.0  |
| weighted avg | 0.909077 | 0.909107  | 0.909141 | 2077.0  |

The result of Model Number:Dataset Number:Featuregroup Number:Rescale of 21 : 0 : 3 : 0

|              | f1-score | precision | recall   | support |
|--------------|----------|-----------|----------|---------|
| AFIB         | 0.778386 | 0.791901  | 0.765424 | 204.0   |
| GSVT         | 0.793725 | 0.791376  | 0.796104 | 300.0   |
| SB           | 0.803084 | 0.800227  | 0.805965 | 892.0   |
| SR           | 0.796555 | 0.797387  | 0.795743 | 681.0   |
| macro avg    | 0.792937 | 0.795223  | 0.790809 | 2077.0  |
| micro avg    | 0.797207 | 0.797207  | 0.797207 | 2077.0  |
| weighted avg | 0.797166 | 0.797200  | 0.797207 | 2077.0  |

The result of Model Number:Dataset Number:Featuregroup Number:Rescale of 21 : 0 : 3 : 1

|      | f1-score | precision | recall   | support |
|------|----------|-----------|----------|---------|
| AFIB | 0.858428 | 0.905125  | 0.816533 | 204.0   |

GSVT 0.901191 0.887561 0.915283 300.0  
SB 0.922607 0.916605 0.928702 892.0  
SR 0.911224 0.912046 0.910426 681.0  
macro avg 0.898363 0.905334 0.892736 2077.0  
micro avg 0.909754 0.909754 0.909754 2077.0  
weighted avg 0.909478 0.909788 0.909754 2077.0  
The result of Model Number:Dataset Number:Featuregroup Number:Rescale of 21 : 0 : 4 :  
0

f1-score precision recall support  
AFIB 0.680515 0.676229 0.766553 204.0  
GSVT 0.829558 0.825292 0.834009 300.0  
SB 0.853178 0.849119 0.857286 892.0  
SR 0.669222 0.671427 0.667436 681.0  
macro avg 0.758118 0.755517 0.781321 2077.0  
micro avg 0.782765 0.782765 0.782765 2077.0  
weighted avg 0.772493 0.770435 0.782765 2077.0  
The result of Model Number:Dataset Number:Featuregroup Number:Rescale of 21 : 0 : 4 :  
1

f1-score precision recall support  
AFIB 0.709925 0.728511 0.692588 204.0  
GSVT 0.667990 0.687405 0.650007 300.0  
SB 0.704873 0.680056 0.731583 892.0  
SR 0.638881 0.659687 0.619476 681.0  
macro avg 0.680417 0.688915 0.673413 2077.0  
micro avg 0.679213 0.679213 0.679213 2077.0  
weighted avg 0.678405 0.679198 0.679213 2077.0  
The result of Model Number:Dataset Number:Featuregroup Number:Rescale of 21 : 0 : 5 :  
0

f1-score precision recall support  
AFIB 0.770856 0.772872 0.769001 204.0  
GSVT 0.788248 0.785196 0.791389 300.0  
SB 0.805926 0.804851 0.807008 892.0  
SR 0.799471 0.801718 0.797241 681.0  
macro avg 0.791125 0.791159 0.791160 2077.0  
micro avg 0.797817 0.797817 0.797817 2077.0  
weighted avg 0.797812 0.797844 0.797817 2077.0  
The result of Model Number:Dataset Number:Featuregroup Number:Rescale of 21 : 0 : 5 :  
1

f1-score precision recall support  
AFIB 0.839364 0.817885 0.862079 875.0  
GSVT 0.793458 0.838429 0.753250 691.0  
SB 0.841343 0.774238 0.921206 1553.0  
SR 0.672091 0.816343 0.571285 907.0  
macro avg 0.786564 0.811724 0.776955 4026.0

micro avg 0.800696 0.800696 0.800696 4026.0  
weighted avg 0.794564 0.804227 0.800696 4026.0  
The result of Model Number:Dataset Number:Featuregroup Number:Rescale of 21 : 0 : 6 :  
0

|              | f1-score | precision | recall   | support |
|--------------|----------|-----------|----------|---------|
| AFIB         | 0.693948 | 0.707490  | 0.681036 | 204.0   |
| GSVT         | 0.711244 | 0.702066  | 0.720712 | 300.0   |
| SB           | 0.723350 | 0.716198  | 0.730648 | 892.0   |
| SR           | 0.708230 | 0.718070  | 0.698661 | 681.0   |
| macro avg    | 0.709193 | 0.710956  | 0.707764 | 2077.0  |
| micro avg    | 0.713852 | 0.713852  | 0.713852 | 2077.0  |
| weighted avg | 0.713756 | 0.713916  | 0.713852 | 2077.0  |

The result of Model Number:Dataset Number:Featuregroup Number:Rescale of 21 : 0 : 6 :  
1

|              | f1-score | precision | recall   | support |
|--------------|----------|-----------|----------|---------|
| AFIB         | 0.801052 | 0.801953  | 0.800299 | 204.0   |
| GSVT         | 0.819443 | 0.817614  | 0.821343 | 300.0   |
| SB           | 0.836812 | 0.835695  | 0.837936 | 892.0   |
| SR           | 0.830545 | 0.832636  | 0.828474 | 681.0   |
| macro avg    | 0.821963 | 0.821974  | 0.822013 | 2077.0  |
| micro avg    | 0.828740 | 0.828740  | 0.828740 | 2077.0  |
| weighted avg | 0.828736 | 0.828766  | 0.828740 | 2077.0  |

The result of Model Number:Dataset Number:Featuregroup Number:Rescale of 21 : 0 : 7 :  
0

|              | f1-score | precision | recall   | support |
|--------------|----------|-----------|----------|---------|
| AFIB         | 0.673087 | 0.665572  | 0.680781 | 875.0   |
| GSVT         | 0.686478 | 0.692766  | 0.680314 | 691.0   |
| SB           | 0.732160 | 0.729776  | 0.734563 | 1553.0  |
| SR           | 0.713180 | 0.720325  | 0.706178 | 907.0   |
| macro avg    | 0.701226 | 0.702110  | 0.700459 | 4026.0  |
| micro avg    | 0.707169 | 0.707169  | 0.707169 | 4026.0  |
| weighted avg | 0.707205 | 0.707341  | 0.707169 | 4026.0  |

The result of Model Number:Dataset Number:Featuregroup Number:Rescale of 21 : 0 : 7 :  
1

|              | f1-score | precision | recall   | support |
|--------------|----------|-----------|----------|---------|
| AFIB         | 0.908405 | 0.915383  | 0.901739 | 204.0   |
| GSVT         | 0.940394 | 0.939493  | 0.941328 | 300.0   |
| SB           | 0.959634 | 0.957398  | 0.961889 | 892.0   |
| SR           | 0.950802 | 0.952084  | 0.949545 | 681.0   |
| macro avg    | 0.939809 | 0.941089  | 0.938625 | 2077.0  |
| micro avg    | 0.948964 | 0.948964  | 0.948964 | 2077.0  |
| weighted avg | 0.948928 | 0.948943  | 0.948964 | 2077.0  |

The result of Model Number:Dataset Number:Featuregroup Number:Rescale of 21 : 0 : 8 :  
0

f1-score precision recall support  
AFIB 0.798300 0.804432 0.792442 204.0  
GSVT 0.826412 0.825620 0.827233 300.0  
SB 0.843320 0.841355 0.845302 892.0  
SR 0.835559 0.836685 0.834454 681.0  
macro avg 0.825898 0.827023 0.824858 2077.0  
micro avg 0.833943 0.833943 0.833943 2077.0  
weighted avg 0.833911 0.833925 0.833943 2077.0  
The result of Model Number:Dataset Number:Featuregroup Number:Rescale of 21 : 0 : 8 :  
1

f1-score precision recall support  
AFIB 0.715958 0.729831 0.702923 204.0  
GSVT 0.743721 0.737502 0.750182 300.0  
SB 0.757598 0.756078 0.759127 892.0  
SR 0.750374 0.751152 0.749602 681.0  
macro avg 0.741913 0.743641 0.740458 2077.0  
micro avg 0.749191 0.749191 0.749191 2077.0  
weighted avg 0.749135 0.749202 0.749191 2077.0  
The result of Model Number:Dataset Number:Featuregroup Number:Rescale of 21 : 0 : 9 :  
0

f1-score precision recall support  
AFIB 0.716531 0.739498 0.695161 204.0  
GSVT 0.737967 0.725271 0.751225 300.0  
SB 0.750733 0.743312 0.758306 892.0  
SR 0.730660 0.739803 0.721756 681.0  
macro avg 0.733973 0.736971 0.731612 2077.0  
micro avg 0.739097 0.739097 0.739097 2077.0  
weighted avg 0.738948 0.739181 0.739097 2077.0  
The result of Model Number:Dataset Number:Featuregroup Number:Rescale of 21 : 0 : 9 :  
1

f1-score precision recall support  
AFIB 0.658303 0.683884 0.634615 875.0  
GSVT 0.707697 0.702471 0.713096 691.0  
SB 0.777705 0.773698 0.781759 1553.0  
SR 0.731891 0.717935 0.746480 907.0  
macro avg 0.718899 0.719497 0.718987 4026.0  
micro avg 0.730046 0.730046 0.730046 4026.0  
weighted avg 0.729418 0.729391 0.730046 4026.0  
The result of Model Number:Dataset Number:Featuregroup Number:Rescale of 21 : 0 :  
10 : 0

f1-score precision recall support  
AFIB 0.757461 0.758653 0.756370 204.0  
GSVT 0.775779 0.774569 0.777059 300.0  
SB 0.791783 0.790817 0.792757 892.0

SR 0.786238 0.787747 0.784738 681.0  
macro avg 0.777815 0.777947 0.777731 2077.0  
micro avg 0.784287 0.784287 0.784287 2077.0  
weighted avg 0.784282 0.784305 0.784287 2077.0  
The result of Model Number:Dataset Number:Featuregroup Number:Rescale of 21 : 0 :  
10 : 1

f1-score precision recall support  
AFIB 0.815084 0.822375 0.808022 875.0  
GSVT 0.830651 0.814856 0.847229 691.0  
SB 0.881666 0.874028 0.889442 1553.0  
SR 0.845454 0.864893 0.826907 907.0  
macro avg 0.843214 0.844038 0.842900 4026.0  
micro avg 0.850413 0.850413 0.850413 4026.0  
weighted avg 0.850281 0.850588 0.850413 4026.0  
The result of Model Number:Dataset Number:Featuregroup Number:Rescale of 21 : 1 : 0 :  
0

f1-score precision recall support  
AFIB 0.750489 0.721798 0.797697 875.0  
GSVT 0.777634 0.750795 0.814036 691.0  
SB 0.866428 0.851135 0.883233 1553.0  
SR 0.733845 0.882406 0.633576 907.0  
macro avg 0.782099 0.801534 0.782136 4026.0  
micro avg 0.796522 0.796522 0.796522 4026.0  
weighted avg 0.796121 0.812848 0.796522 4026.0  
The result of Model Number:Dataset Number:Featuregroup Number:Rescale of 21 : 1 : 0 :  
1

f1-score precision recall support  
AFIB 0.737622 0.772938 0.705567 204.0  
GSVT 0.776915 0.768598 0.785443 300.0  
SB 0.793418 0.789035 0.797860 892.0  
SR 0.784455 0.783775 0.785150 681.0  
macro avg 0.773103 0.778586 0.768505 2077.0  
micro avg 0.782834 0.782834 0.782834 2077.0  
weighted avg 0.782615 0.782777 0.782834 2077.0  
The result of Model Number:Dataset Number:Featuregroup Number:Rescale of 21 : 1 : 1 :  
0

f1-score precision recall support  
AFIB 0.714118 0.782852 0.656723 204.0  
GSVT 0.830521 0.821988 0.839389 300.0  
SB 0.880416 0.876992 0.883870 892.0  
SR 0.860018 0.848125 0.872263 681.0  
macro avg 0.821268 0.832489 0.813061 2077.0  
micro avg 0.851329 0.851329 0.851329 2077.0  
weighted avg 0.850188 0.850336 0.851329 2077.0



The result of Model Number:Dataset Number:Featuregroup Number:Rescale of 21 : 1 : 1 : 1

|              | f1-score | precision | recall   | support |
|--------------|----------|-----------|----------|---------|
| AFIB         | 0.679714 | 0.685762  | 0.673808 | 875.0   |
| GSVT         | 0.693981 | 0.686365  | 0.701812 | 691.0   |
| SB           | 0.746373 | 0.740562  | 0.752282 | 1553.0  |
| SR           | 0.721570 | 0.731797  | 0.711627 | 907.0   |
| macro avg    | 0.710409 | 0.711122  | 0.709882 | 4026.0  |
| micro avg    | 0.717405 | 0.717405  | 0.717405 | 4026.0  |
| weighted avg | 0.717305 | 0.717375  | 0.717405 | 4026.0  |

The result of Model Number:Dataset Number:Featuregroup Number:Rescale of 21 : 1 : 2 : 0

|              | f1-score | precision | recall   | support |
|--------------|----------|-----------|----------|---------|
| AFIB         | 0.645601 | 0.630417  | 0.679677 | 875.0   |
| GSVT         | 0.620364 | 0.614645  | 0.634501 | 691.0   |
| SB           | 0.672827 | 0.625452  | 0.728742 | 1553.0  |
| SR           | 0.419516 | 0.526141  | 0.349365 | 907.0   |
| macro avg    | 0.589577 | 0.599164  | 0.598071 | 4026.0  |
| micro avg    | 0.616435 | 0.616435  | 0.616435 | 4026.0  |
| weighted avg | 0.600838 | 0.602303  | 0.616435 | 4026.0  |

The result of Model Number:Dataset Number:Featuregroup Number:Rescale of 21 : 1 : 2 : 1

|              | f1-score | precision | recall   | support |
|--------------|----------|-----------|----------|---------|
| AFIB         | 0.821614 | 0.816699  | 0.826700 | 875.0   |
| GSVT         | 0.828342 | 0.832815  | 0.824038 | 691.0   |
| SB           | 0.877919 | 0.875352  | 0.880514 | 1553.0  |
| SR           | 0.858081 | 0.864245  | 0.852022 | 907.0   |
| macro avg    | 0.846489 | 0.847278  | 0.845818 | 4026.0  |
| micro avg    | 0.852706 | 0.852706  | 0.852706 | 4026.0  |
| weighted avg | 0.852704 | 0.852802  | 0.852706 | 4026.0  |

The result of Model Number:Dataset Number:Featuregroup Number:Rescale of 21 : 1 : 3 : 0

|              | f1-score | precision | recall   | support |
|--------------|----------|-----------|----------|---------|
| AFIB         | 0.651999 | 0.671919  | 0.633300 | 875.0   |
| GSVT         | 0.691912 | 0.689568  | 0.694332 | 691.0   |
| SB           | 0.756082 | 0.753045  | 0.759148 | 1553.0  |
| SR           | 0.716094 | 0.703674  | 0.729032 | 907.0   |
| macro avg    | 0.704022 | 0.704551  | 0.703953 | 4026.0  |
| micro avg    | 0.713887 | 0.713887  | 0.713887 | 4026.0  |
| weighted avg | 0.713439 | 0.713396  | 0.713887 | 4026.0  |

The result of Model Number:Dataset Number:Featuregroup Number:Rescale of 21 : 1 : 3 : 1

|      | f1-score | precision | recall   | support |
|------|----------|-----------|----------|---------|
| AFIB | 0.728180 | 0.717215  | 0.745547 | 875.0   |

GSVT 0.695280 0.693256 0.701211 691.0  
SB 0.742470 0.691863 0.807238 1553.0  
SR 0.549993 0.735178 0.455736 907.0  
macro avg 0.678981 0.709378 0.677433 4026.0  
micro avg 0.696444 0.696444 0.696444 4026.0  
weighted avg 0.687902 0.707370 0.696444 4026.0  
The result of Model Number:Dataset Number:Featuregroup Number:Rescale of 21 : 1 : 4 :  
0

f1-score precision recall support  
AFIB 0.789087 0.798313 0.780223 204.0  
GSVT 0.810794 0.807066 0.814579 300.0  
SB 0.822274 0.819717 0.824852 892.0  
SR 0.815192 0.817503 0.812929 681.0  
macro avg 0.809337 0.810650 0.808146 2077.0  
micro avg 0.815076 0.815076 0.815076 2077.0  
weighted avg 0.815034 0.815061 0.815076 2077.0  
The result of Model Number:Dataset Number:Featuregroup Number:Rescale of 21 : 1 : 4 :  
1

f1-score precision recall support  
AFIB 0.703834 0.711325 0.696888 204.0  
GSVT 0.724518 0.719690 0.729623 300.0  
SB 0.739829 0.739167 0.740492 892.0  
SR 0.733590 0.734569 0.732619 681.0  
macro avg 0.725443 0.726188 0.724905 2077.0  
micro avg 0.732058 0.732058 0.732058 2077.0  
weighted avg 0.732036 0.732112 0.732058 2077.0  
The result of Model Number:Dataset Number:Featuregroup Number:Rescale of 21 : 1 : 5 :  
0

f1-score precision recall support  
AFIB 0.692671 0.710805 0.675755 204.0  
GSVT 0.651755 0.670698 0.634209 300.0  
SB 0.687741 0.663527 0.713802 892.0  
SR 0.623353 0.643654 0.604420 681.0  
macro avg 0.663880 0.672171 0.657046 2077.0  
micro avg 0.662705 0.662705 0.662705 2077.0  
weighted avg 0.661916 0.662690 0.662705 2077.0  
The result of Model Number:Dataset Number:Featuregroup Number:Rescale of 21 : 1 : 5 :  
1

f1-score precision recall support  
AFIB 0.911785 0.941404 0.884146 204.0  
GSVT 0.929070 0.920753 0.937723 300.0  
SB 0.951162 0.944643 0.957773 892.0  
SR 0.935650 0.939597 0.931790 681.0  
macro avg 0.931917 0.936599 0.927858 2077.0

micro avg 0.939126 0.939126 0.939126 2077.0  
weighted avg 0.939017 0.939220 0.939126 2077.0  
The result of Model Number:Dataset Number:Featuregroup Number:Rescale of 21 : 1 : 6 :  
0

|              | f1-score | precision | recall   | support |
|--------------|----------|-----------|----------|---------|
| AFIB         | 0.702680 | 0.724803  | 0.682039 | 204.0   |
| GSVT         | 0.667583 | 0.681843  | 0.654019 | 300.0   |
| SB           | 0.689294 | 0.665174  | 0.715255 | 892.0   |
| SR           | 0.629500 | 0.650775  | 0.609617 | 681.0   |
| macro avg    | 0.672264 | 0.680649  | 0.665232 | 2077.0  |
| micro avg    | 0.668511 | 0.668511  | 0.668511 | 2077.0  |
| weighted avg | 0.667868 | 0.668717  | 0.668511 | 2077.0  |

The result of Model Number:Dataset Number:Featuregroup Number:Rescale of 21 : 1 : 6 :  
1

|              | f1-score | precision | recall   | support |
|--------------|----------|-----------|----------|---------|
| AFIB         | 0.807461 | 0.816248  | 0.799098 | 204.0   |
| GSVT         | 0.834787 | 0.831306  | 0.838433 | 300.0   |
| SB           | 0.851893 | 0.851131  | 0.852657 | 892.0   |
| SR           | 0.843842 | 0.843850  | 0.843843 | 681.0   |
| macro avg    | 0.834496 | 0.835634  | 0.833507 | 2077.0  |
| micro avg    | 0.842452 | 0.842452  | 0.842452 | 2077.0  |
| weighted avg | 0.842419 | 0.842454  | 0.842452 | 2077.0  |

The result of Model Number:Dataset Number:Featuregroup Number:Rescale of 21 : 1 : 7 :  
0

|              | f1-score | precision | recall   | support |
|--------------|----------|-----------|----------|---------|
| AFIB         | 0.568116 | 0.564538  | 0.639943 | 204.0   |
| GSVT         | 0.692543 | 0.688981  | 0.696259 | 300.0   |
| SB           | 0.712262 | 0.708873  | 0.715691 | 892.0   |
| SR           | 0.558689 | 0.560530  | 0.557197 | 681.0   |
| macro avg    | 0.632902 | 0.630730  | 0.652273 | 2077.0  |
| micro avg    | 0.653478 | 0.653478  | 0.653478 | 2077.0  |
| weighted avg | 0.644903 | 0.643185  | 0.653478 | 2077.0  |

The result of Model Number:Dataset Number:Featuregroup Number:Rescale of 21 : 1 : 7 :  
1

|              | f1-score | precision | recall   | support |
|--------------|----------|-----------|----------|---------|
| AFIB         | 0.719516 | 0.698787  | 0.789448 | 875.0   |
| GSVT         | 0.793004 | 0.790471  | 0.795655 | 691.0   |
| SB           | 0.669412 | 0.659546  | 0.679631 | 1553.0  |
| SR           | 0.801540 | 0.817185  | 0.786584 | 907.0   |
| macro avg    | 0.745868 | 0.741497  | 0.762830 | 4026.0  |
| micro avg    | 0.747507 | 0.747507  | 0.747507 | 4026.0  |
| weighted avg | 0.731281 | 0.726060  | 0.747507 | 4026.0  |

The result of Model Number:Dataset Number:Featuregroup Number:Rescale of 21 : 1 : 8 :  
0

f1-score precision recall support  
AFIB 0.883159 0.900173 0.867193 204.0  
GSVT 0.899743 0.885124 0.915017 300.0  
SB 0.914764 0.903854 0.925943 892.0  
SR 0.897747 0.914579 0.881539 681.0  
macro avg 0.898853 0.900932 0.897423 2077.0  
micro avg 0.904035 0.904035 0.904035 2077.0  
weighted avg 0.903911 0.904304 0.904035 2077.0  
The result of Model Number:Dataset Number:Featuregroup Number:Rescale of 21 : 1 : 8 :  
1

f1-score precision recall support  
AFIB 0.780087 0.795335 0.765549 204.0  
GSVT 0.801522 0.795747 0.807408 300.0  
SB 0.815867 0.812692 0.819068 892.0  
SR 0.806949 0.809232 0.804696 681.0  
macro avg 0.801106 0.803251 0.799180 2077.0  
micro avg 0.807415 0.807415 0.807415 2077.0  
weighted avg 0.807356 0.807405 0.807415 2077.0  
The result of Model Number:Dataset Number:Featuregroup Number:Rescale of 21 : 1 : 9 :  
0

f1-score precision recall support  
AFIB 0.759733 0.763203 0.756337 875.0  
GSVT 0.772399 0.765866 0.779100 691.0  
SB 0.816441 0.808104 0.824957 1553.0  
SR 0.774304 0.790628 0.758683 907.0  
macro avg 0.780719 0.781950 0.779769 4026.0  
micro avg 0.787242 0.787242 0.787242 4026.0  
weighted avg 0.787064 0.787159 0.787242 4026.0  
The result of Model Number:Dataset Number:Featuregroup Number:Rescale of 21 : 1 : 9 :  
1

f1-score precision recall support  
AFIB 0.741126 0.744906 0.737407 875.0  
GSVT 0.751354 0.747445 0.755369 691.0  
SB 0.787536 0.786832 0.788247 1553.0  
SR 0.773035 0.773665 0.772437 907.0  
macro avg 0.763262 0.763212 0.763365 4026.0  
micro avg 0.767993 0.767993 0.767993 4026.0  
weighted avg 0.767972 0.767993 0.767993 4026.0  
The result of Model Number:Dataset Number:Featuregroup Number:Rescale of 21 : 1 :  
10 : 0

f1-score precision recall support  
AFIB 0.697607 0.713397 0.682590 204.0  
GSVT 0.716172 0.712665 0.719744 300.0  
SB 0.730823 0.728712 0.732951 892.0

SR 0.726127 0.725813 0.726452 681.0  
macro avg 0.717682 0.720147 0.715434 2077.0  
micro avg 0.723966 0.723966 0.723966 2077.0  
weighted avg 0.723905 0.723940 0.723966 2077.0  
The result of Model Number:Dataset Number:Featuregroup Number:Rescale of 21 : 1 :  
10 : 1

f1-score precision recall support  
AFIB 0.711372 0.701928 0.721129 875.0  
GSVT 0.725811 0.732692 0.719090 691.0  
SB 0.772367 0.770540 0.774206 1553.0  
SR 0.751414 0.759315 0.743706 907.0  
macro avg 0.740241 0.741119 0.739533 4026.0  
micro avg 0.746339 0.746339 0.746339 4026.0  
weighted avg 0.746399 0.746603 0.746339 4026.0

The result of Model Number:Dataset Number:Featuregroup Number:Rescale of 22 : 0 : 0 :  
0

f1-score precision recall support  
AFIB 0.903121 0.911857 0.894714 204.0  
GSVT 0.935078 0.933235 0.936945 300.0  
SB 0.954623 0.952932 0.956333 892.0  
SR 0.945823 0.946280 0.945406 681.0  
macro avg 0.934661 0.936076 0.933349 2077.0  
micro avg 0.943897 0.943897 0.943897 2077.0  
weighted avg 0.943856 0.943872 0.943897 2077.0

The result of Model Number:Dataset Number:Featuregroup Number:Rescale of 22 : 0 : 0 :  
1

f1-score precision recall support  
AFIB 0.856048 0.861645 0.850575 204.0  
GSVT 0.877496 0.875475 0.879537 300.0  
SB 0.893159 0.891870 0.894459 892.0  
SR 0.886120 0.887046 0.885212 681.0  
macro avg 0.878206 0.879009 0.877446 2077.0  
micro avg 0.884962 0.884962 0.884962 2077.0  
weighted avg 0.884944 0.884952 0.884962 2077.0

The result of Model Number:Dataset Number:Featuregroup Number:Rescale of 22 : 0 : 1 :  
0

f1-score precision recall support  
AFIB 0.694954 0.696717 0.693224 875.0  
GSVT 0.707217 0.699556 0.715077 691.0  
SB 0.745368 0.736936 0.754006 1553.0  
SR 0.711288 0.730762 0.692855 907.0  
macro avg 0.714707 0.715993 0.713790 4026.0  
micro avg 0.720338 0.720338 0.720338 4026.0  
weighted avg 0.720185 0.720388 0.720338 4026.0

The result of Model Number:Dataset Number:Featuregroup Number:Rescale of 22 : 0 : 1 : 1

|              | f1-score | precision | recall   | support |
|--------------|----------|-----------|----------|---------|
| AFIB         | 0.787477 | 0.779556  | 0.795582 | 875.0   |
| GSVT         | 0.794524 | 0.801598  | 0.787632 | 691.0   |
| SB           | 0.840571 | 0.837991  | 0.843168 | 1553.0  |
| SR           | 0.824294 | 0.831509  | 0.817206 | 907.0   |
| macro avg    | 0.811716 | 0.812664  | 0.810897 | 4026.0  |
| micro avg    | 0.817445 | 0.817445  | 0.817445 | 4026.0  |
| weighted avg | 0.817461 | 0.817584  | 0.817445 | 4026.0  |

The result of Model Number:Dataset Number:Featuregroup Number:Rescale of 22 : 0 : 2 : 0

|              | f1-score | precision | recall   | support |
|--------------|----------|-----------|----------|---------|
| AFIB         | 0.747030 | 0.727913  | 0.767246 | 875.0   |
| GSVT         | 0.706174 | 0.746198  | 0.670389 | 691.0   |
| SB           | 0.748791 | 0.689068  | 0.819869 | 1553.0  |
| SR           | 0.598158 | 0.726541  | 0.508441 | 907.0   |
| macro avg    | 0.700038 | 0.722430  | 0.691486 | 4026.0  |
| micro avg    | 0.712616 | 0.712616  | 0.712616 | 4026.0  |
| weighted avg | 0.707158 | 0.715758  | 0.712616 | 4026.0  |

The result of Model Number:Dataset Number:Featuregroup Number:Rescale of 22 : 0 : 2 : 1

|              | f1-score | precision | recall   | support |
|--------------|----------|-----------|----------|---------|
| AFIB         | 0.725034 | 0.717926  | 0.775206 | 204.0   |
| GSVT         | 0.650105 | 0.642876  | 0.657660 | 300.0   |
| SB           | 0.835425 | 0.829341  | 0.841604 | 892.0   |
| SR           | 0.821414 | 0.827103  | 0.815869 | 681.0   |
| macro avg    | 0.757994 | 0.754312  | 0.772585 | 2077.0  |
| micro avg    | 0.800076 | 0.800076  | 0.800076 | 2077.0  |
| weighted avg | 0.793221 | 0.790731  | 0.800076 | 2077.0  |

The result of Model Number:Dataset Number:Featuregroup Number:Rescale of 22 : 0 : 3 : 0

|              | f1-score | precision | recall   | support |
|--------------|----------|-----------|----------|---------|
| AFIB         | 0.842594 | 0.868545  | 0.818317 | 204.0   |
| GSVT         | 0.864089 | 0.853511  | 0.875027 | 300.0   |
| SB           | 0.887560 | 0.882286  | 0.892926 | 892.0   |
| SR           | 0.872599 | 0.876903  | 0.868371 | 681.0   |
| macro avg    | 0.866710 | 0.870311  | 0.863660 | 2077.0  |
| micro avg    | 0.874962 | 0.874962  | 0.874962 | 2077.0  |
| weighted avg | 0.874848 | 0.875015  | 0.874962 | 2077.0  |

The result of Model Number:Dataset Number:Featuregroup Number:Rescale of 22 : 0 : 3 : 1

|      | f1-score | precision | recall   | support |
|------|----------|-----------|----------|---------|
| AFIB | 0.720045 | 0.792691  | 0.660018 | 204.0   |

GSVT 0.849144 0.837423 0.861332 300.0  
SB 0.901626 0.898618 0.904658 892.0  
SR 0.878536 0.866382 0.891048 681.0  
macro avg 0.837338 0.848778 0.829264 2077.0  
micro avg 0.869910 0.869910 0.869910 2077.0  
weighted avg 0.868640 0.868805 0.869910 2077.0  
The result of Model Number:Dataset Number:Featuregroup Number:Rescale of 22 : 0 : 4 :  
0

f1-score precision recall support  
AFIB 0.785552 0.774398 0.797120 875.0  
GSVT 0.814040 0.824425 0.804037 691.0  
SB 0.865101 0.863831 0.866382 1553.0  
SR 0.843549 0.849876 0.837317 907.0  
macro avg 0.827060 0.828133 0.826214 4026.0  
micro avg 0.834080 0.834080 0.834080 4026.0  
weighted avg 0.834193 0.834487 0.834080 4026.0  
The result of Model Number:Dataset Number:Featuregroup Number:Rescale of 22 : 0 : 4 :  
1

f1-score precision recall support  
AFIB 0.785233 0.765139 0.806484 875.0  
GSVT 0.742288 0.784359 0.704673 691.0  
SB 0.787085 0.724308 0.861797 1553.0  
SR 0.628748 0.763697 0.534443 907.0  
macro avg 0.735839 0.759376 0.726850 4026.0  
micro avg 0.749060 0.749060 0.749060 4026.0  
weighted avg 0.743323 0.752363 0.749060 4026.0  
The result of Model Number:Dataset Number:Featuregroup Number:Rescale of 22 : 0 : 5 :  
0

f1-score precision recall support  
AFIB 0.691247 0.721584 0.663532 204.0  
GSVT 0.643506 0.648139 0.639203 300.0  
SB 0.667366 0.633853 0.704624 892.0  
SR 0.592059 0.631149 0.557653 681.0  
macro avg 0.648545 0.658681 0.641253 2077.0  
micro avg 0.642950 0.642950 0.642950 2077.0  
weighted avg 0.641574 0.643647 0.642950 2077.0  
The result of Model Number:Dataset Number:Featuregroup Number:Rescale of 22 : 0 : 5 :  
1

f1-score precision recall support  
AFIB 0.725964 0.767262 0.689366 204.0  
GSVT 0.767180 0.758732 0.775857 300.0  
SB 0.778592 0.770845 0.786523 892.0  
SR 0.769547 0.772178 0.767056 681.0  
macro avg 0.760321 0.767254 0.754701 2077.0

micro avg 0.769057 0.769057 0.769057 2077.0  
weighted avg 0.768809 0.769181 0.769057 2077.0  
The result of Model Number:Dataset Number:Featuregroup Number:Rescale of 22 : 0 : 6 :  
0

|              | f1-score | precision | recall   | support |
|--------------|----------|-----------|----------|---------|
| AFIB         | 0.654011 | 0.646297  | 0.661944 | 875.0   |
| GSVT         | 0.665090 | 0.669298  | 0.660958 | 691.0   |
| SB           | 0.709114 | 0.708161  | 0.710073 | 1553.0  |
| SR           | 0.691693 | 0.698246  | 0.685286 | 907.0   |
| macro avg    | 0.679977 | 0.680501  | 0.679565 | 4026.0  |
| micro avg    | 0.685599 | 0.685599  | 0.685599 | 4026.0  |
| weighted avg | 0.685658 | 0.685812  | 0.685599 | 4026.0  |

The result of Model Number:Dataset Number:Featuregroup Number:Rescale of 22 : 0 : 6 :  
1

|              | f1-score | precision | recall   | support |
|--------------|----------|-----------|----------|---------|
| AFIB         | 0.691245 | 0.704757  | 0.678363 | 204.0   |
| GSVT         | 0.710239 | 0.705122  | 0.715455 | 300.0   |
| SB           | 0.722950 | 0.720137  | 0.725787 | 892.0   |
| SR           | 0.715048 | 0.717072  | 0.713051 | 681.0   |
| macro avg    | 0.709871 | 0.711772  | 0.708164 | 2077.0  |
| micro avg    | 0.715461 | 0.715461  | 0.715461 | 2077.0  |
| weighted avg | 0.715409 | 0.715453  | 0.715461 | 2077.0  |

The result of Model Number:Dataset Number:Featuregroup Number:Rescale of 22 : 0 : 7 :  
0

|              | f1-score | precision | recall   | support |
|--------------|----------|-----------|----------|---------|
| AFIB         | 0.866709 | 0.886326  | 0.848052 | 204.0   |
| GSVT         | 0.889773 | 0.885417  | 0.894212 | 300.0   |
| SB           | 0.907976 | 0.905354  | 0.910620 | 892.0   |
| SR           | 0.902142 | 0.901752  | 0.902546 | 681.0   |
| macro avg    | 0.891650 | 0.894712  | 0.888857 | 2077.0  |
| micro avg    | 0.899457 | 0.899457  | 0.899457 | 2077.0  |
| weighted avg | 0.899381 | 0.899424  | 0.899457 | 2077.0  |

The result of Model Number:Dataset Number:Featuregroup Number:Rescale of 22 : 0 : 7 :  
1

|              | f1-score | precision | recall   | support |
|--------------|----------|-----------|----------|---------|
| AFIB         | 0.758557 | 0.748487  | 0.768961 | 875.0   |
| GSVT         | 0.773953 | 0.781290  | 0.766786 | 691.0   |
| SB           | 0.823597 | 0.821649  | 0.825558 | 1553.0  |
| SR           | 0.801254 | 0.809679  | 0.793036 | 907.0   |
| macro avg    | 0.789340 | 0.790276  | 0.788585 | 4026.0  |
| micro avg    | 0.795843 | 0.795843  | 0.795843 | 4026.0  |
| weighted avg | 0.795907 | 0.796125  | 0.795843 | 4026.0  |

The result of Model Number:Dataset Number:Featuregroup Number:Rescale of 22 : 0 : 8 :  
0



f1-score precision recall support  
AFIB 0.777402 0.855834 0.712593 204.0  
GSVT 0.916784 0.904129 0.929944 300.0  
SB 0.973446 0.970199 0.976720 892.0  
SR 0.948518 0.935395 0.962027 681.0  
macro avg 0.904037 0.916389 0.895321 2077.0  
micro avg 0.939204 0.939204 0.939204 2077.0  
weighted avg 0.937833 0.938012 0.939204 2077.0  
The result of Model Number:Dataset Number:Featuregroup Number:Rescale of 22 : 0 : 8 :  
1

f1-score precision recall support  
AFIB 0.899853 0.890802 0.909115 875.0  
GSVT 0.907906 0.915989 0.900030 691.0  
SB 0.960524 0.957576 0.963492 1553.0  
SR 0.941924 0.950169 0.933824 907.0  
macro avg 0.927552 0.928634 0.926615 4026.0  
micro avg 0.934098 0.934098 0.934098 4026.0  
weighted avg 0.934117 0.934257 0.934098 4026.0  
The result of Model Number:Dataset Number:Featuregroup Number:Rescale of 22 : 0 : 9 :  
0

f1-score precision recall support  
AFIB 0.888886 0.911777 0.867151 204.0  
GSVT 0.815708 0.779398 0.920526 300.0  
SB 0.935852 0.933663 0.938055 892.0  
SR 0.742429 0.742569 0.742299 681.0  
macro avg 0.845719 0.841852 0.867008 2077.0  
micro avg 0.864375 0.864375 0.864375 2077.0  
weighted avg 0.850467 0.846576 0.864375 2077.0  
The result of Model Number:Dataset Number:Featuregroup Number:Rescale of 22 : 0 : 9 :  
1

f1-score precision recall support  
AFIB 0.828029 0.841795 0.814896 204.0  
GSVT 0.843907 0.837911 0.850051 300.0  
SB 0.863481 0.858628 0.868408 892.0  
SR 0.852480 0.857695 0.847355 681.0  
macro avg 0.846974 0.849007 0.845178 2077.0  
micro avg 0.853598 0.853598 0.853598 2077.0  
weighted avg 0.853564 0.853677 0.853598 2077.0  
The result of Model Number:Dataset Number:Featuregroup Number:Rescale of 22 : 0 :  
10 : 0

f1-score precision recall support  
AFIB 0.844601 0.836773 0.852624 875.0  
GSVT 0.859769 0.864438 0.855165 691.0  
SB 0.910974 0.908874 0.913085 1553.0

SR 0.889750 0.897960 0.881716 907.0  
macro avg 0.876274 0.877012 0.875647 4026.0  
micro avg 0.882936 0.882936 0.882936 4026.0  
weighted avg 0.882979 0.883119 0.882936 4026.0  
The result of Model Number:Dataset Number:Featuregroup Number:Rescale of 22 : 0 :

10 : 1

f1-score precision recall support

AFIB 0.670012 0.695526 0.646450 204.0  
GSVT 0.691359 0.684391 0.698501 300.0  
SB 0.705197 0.701686 0.708753 892.0  
SR 0.696679 0.697117 0.696264 681.0  
macro avg 0.690812 0.694680 0.687492 2077.0  
micro avg 0.697058 0.697058 0.697058 2077.0  
weighted avg 0.696949 0.697085 0.697058 2077.0

The result of Model Number:Dataset Number:Featuregroup Number:Rescale of 22 : 1 : 0 :  
0

f1-score precision recall support

AFIB 0.760006 0.759097 0.761046 875.0  
GSVT 0.774821 0.777487 0.772254 691.0  
SB 0.820651 0.815596 0.825776 1553.0  
SR 0.803951 0.811803 0.796338 907.0  
macro avg 0.789857 0.790996 0.788854 4026.0  
micro avg 0.795890 0.795890 0.795890 4026.0  
weighted avg 0.795842 0.795921 0.795890 4026.0

The result of Model Number:Dataset Number:Featuregroup Number:Rescale of 22 : 1 : 0 :  
1

f1-score precision recall support

AFIB 0.673817 0.648057 0.716202 875.0  
GSVT 0.698188 0.674092 0.730872 691.0  
SB 0.777911 0.764180 0.792999 1553.0  
SR 0.658873 0.792257 0.568848 907.0  
macro avg 0.702197 0.719646 0.702230 4026.0  
micro avg 0.715147 0.715147 0.715147 4026.0  
weighted avg 0.714787 0.729805 0.715147 4026.0

The result of Model Number:Dataset Number:Featuregroup Number:Rescale of 22 : 1 : 1 :  
0

f1-score precision recall support

AFIB 0.851547 0.833254 0.870708 875.0  
GSVT 0.881867 0.894656 0.869497 691.0  
SB 0.938782 0.938603 0.938964 1553.0  
SR 0.915253 0.925891 0.904862 907.0  
macro avg 0.896862 0.898101 0.896008 4026.0  
micro avg 0.904524 0.904524 0.904524 4026.0  
weighted avg 0.904753 0.905300 0.904524 4026.0

The result of Model Number:Dataset Number:Featuregroup Number:Rescale of 22 : 1 : 1 : 1

|              | f1-score | precision | recall   | support |
|--------------|----------|-----------|----------|---------|
| AFIB         | 0.837411 | 0.839491  | 0.835398 | 875.0   |
| GSVT         | 0.851833 | 0.854392  | 0.849396 | 691.0   |
| SB           | 0.903641 | 0.897507  | 0.909865 | 1553.0  |
| SR           | 0.886445 | 0.893026  | 0.879995 | 907.0   |
| macro avg    | 0.869833 | 0.871104  | 0.868664 | 4026.0  |
| micro avg    | 0.876573 | 0.876573  | 0.876573 | 4026.0  |
| weighted avg | 0.876481 | 0.876489  | 0.876573 | 4026.0  |

The result of Model Number:Dataset Number:Featuregroup Number:Rescale of 22 : 1 : 2 : 0

|              | f1-score | precision | recall   | support |
|--------------|----------|-----------|----------|---------|
| AFIB         | 0.846679 | 0.845904  | 0.847557 | 875.0   |
| GSVT         | 0.864034 | 0.862358  | 0.865807 | 691.0   |
| SB           | 0.916852 | 0.914810  | 0.918918 | 1553.0  |
| SR           | 0.891827 | 0.897646  | 0.886117 | 907.0   |
| macro avg    | 0.879848 | 0.880179  | 0.879600 | 4026.0  |
| micro avg    | 0.886903 | 0.886903  | 0.886903 | 4026.0  |
| weighted avg | 0.886898 | 0.886965  | 0.886903 | 4026.0  |

The result of Model Number:Dataset Number:Featuregroup Number:Rescale of 22 : 1 : 2 : 1

|              | f1-score | precision | recall   | support |
|--------------|----------|-----------|----------|---------|
| AFIB         | 0.798628 | 0.809295  | 0.788463 | 204.0   |
| GSVT         | 0.812736 | 0.807785  | 0.817872 | 300.0   |
| SB           | 0.832327 | 0.831589  | 0.833072 | 892.0   |
| SR           | 0.826177 | 0.826302  | 0.826057 | 681.0   |
| macro avg    | 0.817467 | 0.818743  | 0.816366 | 2077.0  |
| micro avg    | 0.824195 | 0.824195  | 0.824195 | 2077.0  |
| weighted avg | 0.824171 | 0.824228  | 0.824195 | 2077.0  |

The result of Model Number:Dataset Number:Featuregroup Number:Rescale of 22 : 1 : 3 : 0

|              | f1-score | precision | recall   | support |
|--------------|----------|-----------|----------|---------|
| AFIB         | 0.739760 | 0.793230  | 0.693553 | 204.0   |
| GSVT         | 0.700706 | 0.704496  | 0.697243 | 300.0   |
| SB           | 0.731901 | 0.688014  | 0.781786 | 892.0   |
| SR           | 0.642664 | 0.693579  | 0.598796 | 681.0   |
| macro avg    | 0.703758 | 0.719830  | 0.692844 | 2077.0  |
| micro avg    | 0.700910 | 0.700910  | 0.700910 | 2077.0  |
| weighted avg | 0.698909 | 0.702554  | 0.700910 | 2077.0  |

The result of Model Number:Dataset Number:Featuregroup Number:Rescale of 22 : 1 : 3 : 1

|      | f1-score | precision | recall   | support |
|------|----------|-----------|----------|---------|
| AFIB | 0.739637 | 0.740962  | 0.738341 | 875.0   |

GSVT 0.708252 0.711973 0.704590 691.0  
SB 0.749159 0.707948 0.795471 1553.0  
SR 0.622180 0.700309 0.559789 907.0  
macro avg 0.704807 0.715298 0.699548 4026.0  
micro avg 0.714360 0.714360 0.714360 4026.0  
weighted avg 0.711462 0.714093 0.714360 4026.0  
The result of Model Number:Dataset Number:Featuregroup Number:Rescale of 22 : 1 : 4 :  
0

f1-score precision recall support

AFIB 0.867532 0.855516 0.879926 875.0  
GSVT 0.886774 0.893951 0.879716 691.0  
SB 0.941300 0.938595 0.944026 1553.0  
SR 0.918401 0.930354 0.906760 907.0  
macro avg 0.903502 0.904604 0.902607 4026.0  
micro avg 0.910661 0.910661 0.910661 4026.0  
weighted avg 0.910750 0.911020 0.910661 4026.0

The result of Model Number:Dataset Number:Featuregroup Number:Rescale of 22 : 1 : 4 :  
1

f1-score precision recall support

AFIB 0.848856 0.858565 0.839693 204.0  
GSVT 0.868725 0.863585 0.873942 300.0  
SB 0.833960 0.803155 0.885959 892.0  
SR 0.699561 0.702947 0.696226 681.0  
macro avg 0.812776 0.807063 0.823955 2077.0  
micro avg 0.817470 0.817470 0.817470 2077.0  
weighted avg 0.796379 0.784470 0.817470 2077.0

The result of Model Number:Dataset Number:Featuregroup Number:Rescale of 22 : 1 : 5 :  
0

f1-score precision recall support

AFIB 0.815688 0.804358 0.827420 875.0  
GSVT 0.844837 0.856107 0.833969 691.0  
SB 0.897491 0.895652 0.899340 1553.0  
SR 0.874132 0.880886 0.867481 907.0  
macro avg 0.858037 0.859251 0.857053 4026.0  
micro avg 0.865312 0.865312 0.865312 4026.0  
weighted avg 0.865412 0.865697 0.865312 4026.0

The result of Model Number:Dataset Number:Featuregroup Number:Rescale of 22 : 1 : 5 :  
1

f1-score precision recall support

AFIB 0.823006 0.840269 0.806460 204.0  
GSVT 0.842098 0.837116 0.847149 300.0  
SB 0.862628 0.860607 0.864658 892.0  
SR 0.855341 0.855095 0.855595 681.0  
macro avg 0.845768 0.848272 0.843465 2077.0

micro avg 0.853441 0.853441 0.853441 2077.0  
weighted avg 0.853382 0.853409 0.853441 2077.0  
The result of Model Number:Dataset Number:Featuregroup Number:Rescale of 22 : 1 : 6 :  
0

|              | f1-score | precision | recall   | support |
|--------------|----------|-----------|----------|---------|
| AFIB         | 0.779538 | 0.832765  | 0.733040 | 204.0   |
| GSVT         | 0.824050 | 0.807257  | 0.841627 | 300.0   |
| SB           | 0.844489 | 0.837085  | 0.852056 | 892.0   |
| SR           | 0.823658 | 0.826401  | 0.821007 | 681.0   |
| macro avg    | 0.817934 | 0.825877  | 0.811933 | 2077.0  |
| micro avg    | 0.828680 | 0.828680  | 0.828680 | 2077.0  |
| weighted avg | 0.828327 | 0.828850  | 0.828680 | 2077.0  |

The result of Model Number:Dataset Number:Featuregroup Number:Rescale of 22 : 1 : 6 :  
1

|              | f1-score | precision | recall   | support |
|--------------|----------|-----------|----------|---------|
| AFIB         | 0.683901 | 0.714296  | 0.656082 | 204.0   |
| GSVT         | 0.712400 | 0.706808  | 0.718098 | 300.0   |
| SB           | 0.723283 | 0.717703  | 0.728956 | 892.0   |
| SR           | 0.715281 | 0.716462  | 0.714129 | 681.0   |
| macro avg    | 0.708716 | 0.713817  | 0.704316 | 2077.0  |
| micro avg    | 0.715369 | 0.715369  | 0.715369 | 2077.0  |
| weighted avg | 0.715219 | 0.715388  | 0.715369 | 2077.0  |

The result of Model Number:Dataset Number:Featuregroup Number:Rescale of 22 : 1 : 7 :  
0

|              | f1-score | precision | recall   | support |
|--------------|----------|-----------|----------|---------|
| AFIB         | 0.832324 | 0.897196  | 0.776587 | 204.0   |
| GSVT         | 0.857706 | 0.872225  | 0.843699 | 300.0   |
| SB           | 0.909007 | 0.900641  | 0.917558 | 892.0   |
| SR           | 0.872828 | 0.860171  | 0.885903 | 681.0   |
| macro avg    | 0.867966 | 0.882558  | 0.855937 | 2077.0  |
| micro avg    | 0.882665 | 0.882665  | 0.882665 | 2077.0  |
| weighted avg | 0.882203 | 0.882929  | 0.882665 | 2077.0  |

The result of Model Number:Dataset Number:Featuregroup Number:Rescale of 22 : 1 : 7 :  
1

|              | f1-score | precision | recall   | support |
|--------------|----------|-----------|----------|---------|
| AFIB         | 0.571943 | 0.634740  | 0.520590 | 204.0   |
| GSVT         | 0.667821 | 0.659472  | 0.676515 | 300.0   |
| SB           | 0.710529 | 0.706903  | 0.714192 | 892.0   |
| SR           | 0.693884 | 0.684183  | 0.703867 | 681.0   |
| macro avg    | 0.661044 | 0.671324  | 0.653791 | 2077.0  |
| micro avg    | 0.686349 | 0.686349  | 0.686349 | 2077.0  |
| weighted avg | 0.685291 | 0.685515  | 0.686349 | 2077.0  |

The result of Model Number:Dataset Number:Featuregroup Number:Rescale of 22 : 1 : 8 :  
0

f1-score precision recall support  
AFIB 0.863408 0.867813 0.859076 875.0  
GSVT 0.875324 0.870770 0.880002 691.0  
SB 0.917476 0.916656 0.918304 1553.0  
SR 0.900582 0.901316 0.899886 907.0  
macro avg 0.889198 0.889139 0.889317 4026.0  
micro avg 0.894708 0.894708 0.894708 4026.0  
weighted avg 0.894684 0.894709 0.894708 4026.0  
The result of Model Number:Dataset Number:Featuregroup Number:Rescale of 22 : 1 : 8 :  
1

f1-score precision recall support  
AFIB 0.920468 0.939775 0.901962 204.0  
GSVT 0.941821 0.936248 0.947469 300.0  
SB 0.964781 0.962522 0.967052 892.0  
SR 0.956632 0.956357 0.956916 681.0  
macro avg 0.945925 0.948726 0.943350 2077.0  
micro avg 0.954507 0.954507 0.954507 2077.0  
weighted avg 0.954441 0.954472 0.954507 2077.0  
The result of Model Number:Dataset Number:Featuregroup Number:Rescale of 22 : 1 : 9 :  
0

f1-score precision recall support  
AFIB 0.637302 0.632197 0.642565 875.0  
GSVT 0.654902 0.656020 0.653865 691.0  
SB 0.694300 0.692439 0.696177 1553.0  
SR 0.675330 0.683191 0.667662 907.0  
macro avg 0.665459 0.665962 0.665067 4026.0  
micro avg 0.670839 0.670839 0.670839 4026.0  
weighted avg 0.670877 0.671012 0.670839 4026.0  
The result of Model Number:Dataset Number:Featuregroup Number:Rescale of 22 : 1 : 9 :  
1

f1-score precision recall support  
AFIB 0.792623 0.795299 0.789992 875.0  
GSVT 0.790529 0.784961 0.796249 691.0  
SB 0.831782 0.824062 0.839654 1553.0  
SR 0.800160 0.815580 0.785351 907.0  
macro avg 0.803773 0.804976 0.802811 4026.0  
micro avg 0.809177 0.809177 0.809177 4026.0  
weighted avg 0.809067 0.809189 0.809177 4026.0  
The result of Model Number:Dataset Number:Featuregroup Number:Rescale of 22 : 1 :  
10 : 0

f1-score precision recall support  
AFIB 0.725650 0.731979 0.719611 204.0  
GSVT 0.750745 0.749520 0.751993 300.0  
SB 0.766703 0.764833 0.768591 892.0

SR 0.759674 0.760819 0.758558 681.0  
macro avg 0.750693 0.751787 0.749688 2077.0  
micro avg 0.758093 0.758093 0.758093 2077.0  
weighted avg 0.758061 0.758078 0.758093 2077.0  
The result of Model Number:Dataset Number:Featuregroup Number:Rescale of 22 : 1 :  
10 : 1

f1-score precision recall support  
AFIB 0.592576 0.654557 0.541491 204.0  
GSVT 0.697125 0.687920 0.706653 300.0  
SB 0.739298 0.736425 0.742198 892.0  
SR 0.721533 0.711250 0.732126 681.0  
macro avg 0.687633 0.697538 0.680617 2077.0  
micro avg 0.714048 0.714048 0.714048 2077.0  
weighted avg 0.712971 0.713124 0.714048 2077.0

The result of Model Number:Dataset Number:Featuregroup Number:Rescale of 23 : 0 : 0 :  
0

f1-score precision recall support  
AFIB 0.836724 0.891242 0.788862 204.0  
GSVT 0.873379 0.851912 0.896076 300.0  
SB 0.898993 0.887445 0.910878 892.0  
SR 0.875643 0.886099 0.865489 681.0  
macro avg 0.871185 0.879174 0.865326 2077.0  
micro avg 0.881874 0.881874 0.881874 2077.0  
weighted avg 0.881522 0.882244 0.881874 2077.0

The result of Model Number:Dataset Number:Featuregroup Number:Rescale of 23 : 0 : 0 :  
1

f1-score precision recall support  
AFIB 0.669673 0.675778 0.663765 204.0  
GSVT 0.687149 0.684900 0.689435 300.0  
SB 0.699711 0.699245 0.700181 892.0  
SR 0.693557 0.693358 0.693767 681.0  
macro avg 0.687523 0.688320 0.686787 2077.0  
micro avg 0.692949 0.692949 0.692949 2077.0  
weighted avg 0.692929 0.692938 0.692949 2077.0

The result of Model Number:Dataset Number:Featuregroup Number:Rescale of 23 : 0 : 1 :  
0

f1-score precision recall support  
AFIB 0.827328 0.816688 0.838308 875.0  
GSVT 0.844170 0.851159 0.837329 691.0  
SB 0.902587 0.898570 0.906651 1553.0  
SR 0.876902 0.889871 0.864326 907.0  
macro avg 0.862747 0.864072 0.861654 4026.0  
micro avg 0.870364 0.870364 0.870364 4026.0  
weighted avg 0.870418 0.870677 0.870364 4026.0

The result of Model Number:Dataset Number:Featuregroup Number:Rescale of 23 : 0 : 1 : 1

|              | f1-score | precision | recall   | support |
|--------------|----------|-----------|----------|---------|
| AFIB         | 0.845408 | 0.863782  | 0.828031 | 204.0   |
| GSVT         | 0.880306 | 0.875113  | 0.885585 | 300.0   |
| SB           | 0.899219 | 0.897224  | 0.901232 | 892.0   |
| SR           | 0.890204 | 0.889702  | 0.890729 | 681.0   |
| macro avg    | 0.878784 | 0.881455  | 0.876394 | 2077.0  |
| micro avg    | 0.888339 | 0.888339  | 0.888339 | 2077.0  |
| weighted avg | 0.888246 | 0.888280  | 0.888339 | 2077.0  |

The result of Model Number:Dataset Number:Featuregroup Number:Rescale of 23 : 0 : 2 : 0

|              | f1-score | precision | recall   | support |
|--------------|----------|-----------|----------|---------|
| AFIB         | 0.865217 | 0.901810  | 0.831765 | 204.0   |
| GSVT         | 0.796802 | 0.798197  | 0.807364 | 300.0   |
| SB           | 0.857831 | 0.816964  | 0.903833 | 892.0   |
| SR           | 0.758364 | 0.819445  | 0.707130 | 681.0   |
| macro avg    | 0.819553 | 0.834104  | 0.812523 | 2077.0  |
| micro avg    | 0.818326 | 0.818326  | 0.818326 | 2077.0  |
| weighted avg | 0.817128 | 0.823400  | 0.818326 | 2077.0  |

The result of Model Number:Dataset Number:Featuregroup Number:Rescale of 23 : 0 : 2 : 1

|              | f1-score | precision | recall   | support |
|--------------|----------|-----------|----------|---------|
| AFIB         | 0.831264 | 0.851010  | 0.812490 | 204.0   |
| GSVT         | 0.858569 | 0.850519  | 0.866863 | 300.0   |
| SB           | 0.877007 | 0.876027  | 0.877991 | 892.0   |
| SR           | 0.868543 | 0.867670  | 0.869431 | 681.0   |
| macro avg    | 0.858846 | 0.861306  | 0.856694 | 2077.0  |
| micro avg    | 0.867144 | 0.867144  | 0.867144 | 2077.0  |
| weighted avg | 0.867076 | 0.867145  | 0.867144 | 2077.0  |

The result of Model Number:Dataset Number:Featuregroup Number:Rescale of 23 : 0 : 3 : 0

|              | f1-score | precision | recall   | support |
|--------------|----------|-----------|----------|---------|
| AFIB         | 0.718734 | 0.725163  | 0.712507 | 875.0   |
| GSVT         | 0.732461 | 0.718533  | 0.747079 | 691.0   |
| SB           | 0.777446 | 0.770711  | 0.784303 | 1553.0  |
| SR           | 0.745514 | 0.762656  | 0.729160 | 907.0   |
| macro avg    | 0.743539 | 0.744266  | 0.743262 | 4026.0  |
| micro avg    | 0.749887 | 0.749887  | 0.749887 | 4026.0  |
| weighted avg | 0.749771 | 0.750041  | 0.749887 | 4026.0  |

The result of Model Number:Dataset Number:Featuregroup Number:Rescale of 23 : 0 : 3 : 1

|      | f1-score | precision | recall   | support |
|------|----------|-----------|----------|---------|
| AFIB | 0.641421 | 0.633232  | 0.649862 | 875.0   |



GSVT 0.652679 0.656422 0.648997 691.0  
SB 0.698653 0.695719 0.701619 1553.0  
SR 0.678081 0.689057 0.667462 907.0  
macro avg 0.667709 0.668607 0.666985 4026.0  
micro avg 0.673643 0.673643 0.673643 4026.0  
weighted avg 0.673689 0.673893 0.673643 4026.0  
The result of Model Number:Dataset Number:Featuregroup Number:Rescale of 23 : 0 : 4 :  
0

f1-score precision recall support  
AFIB 0.804819 0.809624 0.800094 204.0  
GSVT 0.824595 0.821054 0.828167 300.0  
SB 0.838717 0.837502 0.839938 892.0  
SR 0.831048 0.832765 0.829342 681.0  
macro avg 0.824795 0.825236 0.824385 2077.0  
micro avg 0.830850 0.830850 0.830850 2077.0  
weighted avg 0.830833 0.830835 0.830850 2077.0  
The result of Model Number:Dataset Number:Featuregroup Number:Rescale of 23 : 0 : 4 :  
1

f1-score precision recall support  
AFIB 0.767351 0.765224 0.769547 875.0  
GSVT 0.773424 0.777112 0.769847 691.0  
SB 0.809639 0.807052 0.812245 1553.0  
SR 0.796695 0.800543 0.792921 907.0  
macro avg 0.786777 0.787483 0.786140 4026.0  
micro avg 0.791335 0.791335 0.791335 4026.0  
weighted avg 0.791316 0.791356 0.791335 4026.0  
The result of Model Number:Dataset Number:Featuregroup Number:Rescale of 23 : 0 : 5 :  
0

f1-score precision recall support  
AFIB 0.853699 0.871679 0.836580 204.0  
GSVT 0.880241 0.872200 0.888453 300.0  
SB 0.894617 0.892623 0.896623 892.0  
SR 0.883986 0.884910 0.883073 681.0  
macro avg 0.878136 0.880353 0.876182 2077.0  
micro avg 0.885103 0.885103 0.885103 2077.0  
weighted avg 0.885036 0.885087 0.885103 2077.0  
The result of Model Number:Dataset Number:Featuregroup Number:Rescale of 23 : 0 : 5 :  
1

f1-score precision recall support  
AFIB 0.706421 0.727844 0.686252 875.0  
GSVT 0.754114 0.748885 0.759458 691.0  
SB 0.825093 0.821937 0.828279 1553.0  
SR 0.780339 0.768627 0.792459 907.0  
macro avg 0.766492 0.766823 0.766612 4026.0

micro avg 0.777530 0.777530 0.777530 4026.0  
weighted avg 0.777036 0.776939 0.777530 4026.0  
The result of Model Number:Dataset Number:Featuregroup Number:Rescale of 23 : 0 : 6 :  
0

|              | f1-score | precision | recall   | support |
|--------------|----------|-----------|----------|---------|
| AFIB         | 0.664532 | 0.661830  | 0.667273 | 875.0   |
| GSVT         | 0.674245 | 0.678321  | 0.670244 | 691.0   |
| SB           | 0.711119 | 0.710253  | 0.711989 | 1553.0  |
| SR           | 0.696283 | 0.697386  | 0.695204 | 907.0   |
| macro avg    | 0.686545 | 0.686948  | 0.686178 | 4026.0  |
| micro avg    | 0.691324 | 0.691324  | 0.691324 | 4026.0  |
| weighted avg | 0.691323 | 0.691349  | 0.691324 | 4026.0  |

The result of Model Number:Dataset Number:Featuregroup Number:Rescale of 23 : 0 : 6 :  
1

|              | f1-score | precision | recall   | support |
|--------------|----------|-----------|----------|---------|
| AFIB         | 0.874316 | 0.880206  | 0.868633 | 875.0   |
| GSVT         | 0.889919 | 0.877559  | 0.902797 | 691.0   |
| SB           | 0.948306 | 0.941812  | 0.954898 | 1553.0  |
| SR           | 0.909876 | 0.925593  | 0.894734 | 907.0   |
| macro avg    | 0.905604 | 0.906293  | 0.905265 | 4026.0  |
| micro avg    | 0.913653 | 0.913653  | 0.913653 | 4026.0  |
| weighted avg | 0.913546 | 0.913741  | 0.913653 | 4026.0  |

The result of Model Number:Dataset Number:Featuregroup Number:Rescale of 23 : 0 : 7 :  
0

|              | f1-score | precision | recall   | support |
|--------------|----------|-----------|----------|---------|
| AFIB         | 0.621223 | 0.635380  | 0.607783 | 875.0   |
| GSVT         | 0.661061 | 0.662368  | 0.659980 | 691.0   |
| SB           | 0.723245 | 0.719286  | 0.727249 | 1553.0  |
| SR           | 0.683575 | 0.675283  | 0.692168 | 907.0   |
| macro avg    | 0.672276 | 0.673079  | 0.671795 | 4026.0  |
| micro avg    | 0.681836 | 0.681836  | 0.681836 | 4026.0  |
| weighted avg | 0.681462 | 0.681368  | 0.681836 | 4026.0  |

The result of Model Number:Dataset Number:Featuregroup Number:Rescale of 23 : 0 : 7 :  
1

|              | f1-score | precision | recall   | support |
|--------------|----------|-----------|----------|---------|
| AFIB         | 0.799693 | 0.820629  | 0.780164 | 204.0   |
| GSVT         | 0.752456 | 0.774325  | 0.732198 | 300.0   |
| SB           | 0.794002 | 0.766047  | 0.824089 | 892.0   |
| SR           | 0.719666 | 0.743103  | 0.697807 | 681.0   |
| macro avg    | 0.766454 | 0.776026  | 0.758565 | 2077.0  |
| micro avg    | 0.765097 | 0.765097  | 0.765097 | 2077.0  |
| weighted avg | 0.764187 | 0.765081  | 0.765097 | 2077.0  |

The result of Model Number:Dataset Number:Featuregroup Number:Rescale of 23 : 0 : 8 :  
0

f1-score precision recall support  
AFIB 0.845162 0.868946 0.822818 204.0  
GSVT 0.867012 0.860926 0.873348 300.0  
SB 0.890854 0.887290 0.894449 892.0  
SR 0.879013 0.879563 0.878491 681.0  
macro avg 0.870510 0.874181 0.867276 2077.0  
micro avg 0.879133 0.879133 0.879133 2077.0  
weighted avg 0.879040 0.879147 0.879133 2077.0  
The result of Model Number:Dataset Number:Featuregroup Number:Rescale of 23 : 0 : 8 :  
1

f1-score precision recall support  
AFIB 0.735072 0.730265 0.740007 875.0  
GSVT 0.756920 0.763360 0.750688 691.0  
SB 0.805843 0.804088 0.807608 1553.0  
SR 0.786204 0.789361 0.783084 907.0  
macro avg 0.771010 0.771769 0.770347 4026.0  
micro avg 0.777621 0.777621 0.777621 4026.0  
weighted avg 0.777641 0.777736 0.777621 4026.0  
The result of Model Number:Dataset Number:Featuregroup Number:Rescale of 23 : 0 : 9 :  
0

f1-score precision recall support  
AFIB 0.680265 0.698651 0.662963 204.0  
GSVT 0.685872 0.675776 0.696369 300.0  
SB 0.699158 0.691720 0.706760 892.0  
SR 0.686190 0.695619 0.677025 681.0  
macro avg 0.687871 0.690442 0.685779 2077.0  
micro avg 0.691208 0.691208 0.691208 2077.0  
weighted avg 0.691132 0.691376 0.691208 2077.0  
The result of Model Number:Dataset Number:Featuregroup Number:Rescale of 23 : 0 : 9 :  
1

f1-score precision recall support  
AFIB 0.833374 0.842442 0.824742 204.0  
GSVT 0.861576 0.857983 0.865339 300.0  
SB 0.879232 0.878445 0.880020 892.0  
SR 0.870922 0.870930 0.870922 681.0  
macro avg 0.861276 0.862450 0.860256 2077.0  
micro avg 0.869487 0.869487 0.869487 2077.0  
weighted avg 0.869453 0.869489 0.869487 2077.0  
The result of Model Number:Dataset Number:Featuregroup Number:Rescale of 23 : 0 :  
10 : 0

f1-score precision recall support  
AFIB 0.838628 0.835217 0.842087 875.0  
GSVT 0.850886 0.856030 0.845837 691.0  
SB 0.897419 0.896327 0.898518 1553.0

SR 0.878698 0.880090 0.877336 907.0  
macro avg 0.866408 0.866916 0.865944 4026.0  
micro avg 0.872439 0.872439 0.872439 4026.0  
weighted avg 0.872437 0.872471 0.872439 4026.0  
The result of Model Number:Dataset Number:Featuregroup Number:Rescale of 23 : 0 :  
10 : 1

f1-score precision recall support  
AFIB 0.821403 0.829801 0.813242 875.0  
GSVT 0.821156 0.808470 0.834342 691.0  
SB 0.866209 0.861037 0.871452 1553.0  
SR 0.843282 0.854569 0.832315 907.0  
macro avg 0.838013 0.838469 0.837838 4026.0  
micro avg 0.843614 0.843614 0.843614 4026.0  
weighted avg 0.843573 0.843769 0.843614 4026.0  
The result of Model Number:Dataset Number:Featuregroup Number:Rescale of 23 : 1 : 0 :  
0

f1-score precision recall support  
AFIB 0.705024 0.706466 0.703663 204.0  
GSVT 0.720530 0.717730 0.723403 300.0  
SB 0.736526 0.735543 0.737515 892.0  
SR 0.731116 0.733277 0.728970 681.0  
macro avg 0.723299 0.723254 0.723388 2077.0  
micro avg 0.729350 0.729350 0.729350 2077.0  
weighted avg 0.729348 0.729371 0.729350 2077.0  
The result of Model Number:Dataset Number:Featuregroup Number:Rescale of 23 : 1 : 0 :  
1

f1-score precision recall support  
AFIB 0.830792 0.873713 0.792137 204.0  
GSVT 0.871156 0.862641 0.879860 300.0  
SB 0.886517 0.879385 0.893770 892.0  
SR 0.875567 0.876632 0.874539 681.0  
macro avg 0.866008 0.873093 0.860077 2077.0  
micro avg 0.875473 0.875473 0.875473 2077.0  
weighted avg 0.875235 0.875507 0.875473 2077.0  
The result of Model Number:Dataset Number:Featuregroup Number:Rescale of 23 : 1 : 1 :  
0

f1-score precision recall support  
AFIB 0.749935 0.741090 0.759025 875.0  
GSVT 0.764672 0.771322 0.758141 691.0  
SB 0.814951 0.811832 0.818097 1553.0  
SR 0.795723 0.805343 0.786338 907.0  
macro avg 0.781320 0.782397 0.780400 4026.0  
micro avg 0.787813 0.787813 0.787813 4026.0  
weighted avg 0.787859 0.788042 0.787813 4026.0

The result of Model Number:Dataset Number:Featuregroup Number:Rescale of 23 : 1 : 1 : 1

|              | f1-score | precision | recall   | support |
|--------------|----------|-----------|----------|---------|
| AFIB         | 0.653247 | 0.644907  | 0.661844 | 875.0   |
| GSVT         | 0.664713 | 0.668525  | 0.660962 | 691.0   |
| SB           | 0.711534 | 0.708546  | 0.714555 | 1553.0  |
| SR           | 0.690583 | 0.701761  | 0.679768 | 907.0   |
| macro avg    | 0.680019 | 0.680935  | 0.679282 | 4026.0  |
| micro avg    | 0.686063 | 0.686063  | 0.686063 | 4026.0  |
| weighted avg | 0.686110 | 0.686317  | 0.686063 | 4026.0  |

The result of Model Number:Dataset Number:Featuregroup Number:Rescale of 23 : 1 : 2 : 0

|              | f1-score | precision | recall   | support |
|--------------|----------|-----------|----------|---------|
| AFIB         | 0.675010 | 0.673701  | 0.676411 | 875.0   |
| GSVT         | 0.687685 | 0.675653  | 0.700219 | 691.0   |
| SB           | 0.736705 | 0.726252  | 0.747471 | 1553.0  |
| SR           | 0.697854 | 0.728963  | 0.669321 | 907.0   |
| macro avg    | 0.699313 | 0.701142  | 0.698356 | 4026.0  |
| micro avg    | 0.706311 | 0.706311  | 0.706311 | 4026.0  |
| weighted avg | 0.706130 | 0.706757  | 0.706311 | 4026.0  |

The result of Model Number:Dataset Number:Featuregroup Number:Rescale of 23 : 1 : 2 : 1

|              | f1-score | precision | recall   | support |
|--------------|----------|-----------|----------|---------|
| AFIB         | 0.688292 | 0.721659  | 0.657949 | 204.0   |
| GSVT         | 0.716957 | 0.707589  | 0.726722 | 300.0   |
| SB           | 0.736267 | 0.730669  | 0.741963 | 892.0   |
| SR           | 0.715767 | 0.717906  | 0.713673 | 681.0   |
| macro avg    | 0.714321 | 0.719456  | 0.710077 | 2077.0  |
| micro avg    | 0.722234 | 0.722234  | 0.722234 | 2077.0  |
| weighted avg | 0.722045 | 0.722266  | 0.722234 | 2077.0  |

The result of Model Number:Dataset Number:Featuregroup Number:Rescale of 23 : 1 : 3 : 0

|              | f1-score | precision | recall   | support |
|--------------|----------|-----------|----------|---------|
| AFIB         | 0.710468 | 0.711922  | 0.709097 | 204.0   |
| GSVT         | 0.726094 | 0.723272  | 0.728990 | 300.0   |
| SB           | 0.742213 | 0.741223  | 0.743210 | 892.0   |
| SR           | 0.736761 | 0.738939  | 0.734599 | 681.0   |
| macro avg    | 0.728884 | 0.728839  | 0.728974 | 2077.0  |
| micro avg    | 0.734982 | 0.734982  | 0.734982 | 2077.0  |
| weighted avg | 0.734979 | 0.735003  | 0.734982 | 2077.0  |

The result of Model Number:Dataset Number:Featuregroup Number:Rescale of 23 : 1 : 3 : 1

|      | f1-score | precision | recall   | support |
|------|----------|-----------|----------|---------|
| AFIB | 0.632621 | 0.613713  | 0.674539 | 875.0   |

GSVT 0.541746 0.529883 0.554354 691.0  
SB 0.718562 0.712707 0.724704 1553.0  
SR 0.674114 0.702417 0.649270 907.0  
macro avg 0.641761 0.639680 0.650717 4026.0  
micro avg 0.667569 0.667569 0.667569 4026.0  
weighted avg 0.659523 0.657495 0.667569 4026.0  
The result of Model Number:Dataset Number:Featuregroup Number:Rescale of 23 : 1 : 4 :  
0

f1-score precision recall support  
AFIB 0.738863 0.754922 0.723676 204.0  
GSVT 0.769363 0.764825 0.773977 300.0  
SB 0.785892 0.784149 0.787652 892.0  
SR 0.778014 0.777575 0.778473 681.0  
macro avg 0.768033 0.770368 0.765944 2077.0  
micro avg 0.776383 0.776383 0.776383 2077.0  
weighted avg 0.776302 0.776332 0.776383 2077.0  
The result of Model Number:Dataset Number:Featuregroup Number:Rescale of 23 : 1 : 4 :  
1

f1-score precision recall support  
AFIB 0.616729 0.573512 0.724231 875.0  
GSVT 0.528924 0.493825 0.598267 691.0  
SB 0.632031 0.626698 0.637469 1553.0  
SR 0.609186 0.623952 0.595315 907.0  
macro avg 0.596718 0.579497 0.638821 4026.0  
micro avg 0.640101 0.640101 0.640101 4026.0  
weighted avg 0.605862 0.591714 0.640101 4026.0  
The result of Model Number:Dataset Number:Featuregroup Number:Rescale of 23 : 1 : 5 :  
0

f1-score precision recall support  
AFIB 0.839763 0.848349 0.831419 875.0  
GSVT 0.839510 0.826541 0.852992 691.0  
SB 0.885571 0.880283 0.890931 1553.0  
SR 0.862132 0.873671 0.850919 907.0  
macro avg 0.856744 0.857211 0.856565 4026.0  
micro avg 0.862471 0.862471 0.862471 4026.0  
weighted avg 0.862429 0.862629 0.862471 4026.0  
The result of Model Number:Dataset Number:Featuregroup Number:Rescale of 23 : 1 : 5 :  
1

f1-score precision recall support  
AFIB 0.800410 0.821364 0.780863 204.0  
GSVT 0.753131 0.775019 0.732855 300.0  
SB 0.794714 0.766734 0.824828 892.0  
SR 0.720311 0.743769 0.698432 681.0  
macro avg 0.767141 0.776722 0.759245 2077.0

micro avg 0.765783 0.765783 0.765783 2077.0  
weighted avg 0.764872 0.765767 0.765783 2077.0  
The result of Model Number:Dataset Number:Featuregroup Number:Rescale of 23 : 1 : 6 :  
0

f1-score precision recall support  
AFIB 0.704869 0.695106 0.714938 875.0  
GSVT 0.720502 0.726333 0.714768 691.0  
SB 0.764804 0.762607 0.767020 1553.0  
SR 0.746199 0.755911 0.736741 907.0  
macro avg 0.734094 0.734989 0.733367 4026.0  
micro avg 0.739911 0.739911 0.739911 4026.0  
weighted avg 0.739983 0.740202 0.739911 4026.0

The result of Model Number:Dataset Number:Featuregroup Number:Rescale of 23 : 1 : 6 :  
1

f1-score precision recall support  
AFIB 0.709788 0.708995 0.710604 875.0  
GSVT 0.722771 0.713731 0.732064 691.0  
SB 0.759267 0.753163 0.765477 1553.0  
SR 0.725392 0.744425 0.707320 907.0  
macro avg 0.729305 0.730079 0.728866 4026.0  
micro avg 0.734714 0.734714 0.734714 4026.0  
weighted avg 0.734618 0.734827 0.734714 4026.0

The result of Model Number:Dataset Number:Featuregroup Number:Rescale of 23 : 1 : 7 :  
0

f1-score precision recall support  
AFIB 0.741712 0.747855 0.835437 204.0  
GSVT 0.804337 0.769910 0.907480 300.0  
SB 0.734389 0.731837 0.736962 892.0  
SR 0.727087 0.727225 0.726955 681.0  
macro avg 0.751881 0.744207 0.801708 2077.0  
micro avg 0.767982 0.767982 0.767982 2077.0  
weighted avg 0.742818 0.737397 0.767982 2077.0

The result of Model Number:Dataset Number:Featuregroup Number:Rescale of 23 : 1 : 7 :  
1

f1-score precision recall support  
AFIB 0.892825 0.916418 0.870505 204.0  
GSVT 0.917310 0.909690 0.925227 300.0  
SB 0.942588 0.939128 0.946074 892.0  
SR 0.927993 0.929117 0.926896 681.0  
macro avg 0.920179 0.923588 0.917176 2077.0  
micro avg 0.929353 0.929353 0.929353 2077.0  
weighted avg 0.929264 0.929363 0.929353 2077.0

The result of Model Number:Dataset Number:Featuregroup Number:Rescale of 23 : 1 : 8 :  
0

f1-score precision recall support  
AFIB 0.770157 0.749925 0.818371 875.0  
GSVT 0.740884 0.701256 0.844593 691.0  
SB 0.702026 0.697589 0.706540 1553.0  
SR 0.681907 0.693656 0.670740 907.0  
macro avg 0.723744 0.710607 0.760061 4026.0  
micro avg 0.746475 0.746475 0.746475 4026.0  
weighted avg 0.718970 0.708707 0.746475 4026.0  
The result of Model Number:Dataset Number:Featuregroup Number:Rescale of 23 : 1 : 8 :  
1

f1-score precision recall support  
AFIB 0.818638 0.822695 0.814709 875.0  
GSVT 0.826789 0.827980 0.825727 691.0  
SB 0.870307 0.866269 0.874393 1553.0  
SR 0.854286 0.856425 0.852204 907.0  
macro avg 0.842505 0.843343 0.841758 4026.0  
micro avg 0.848070 0.848070 0.848070 4026.0  
weighted avg 0.847999 0.848010 0.848070 4026.0  
The result of Model Number:Dataset Number:Featuregroup Number:Rescale of 23 : 1 : 9 :  
0

f1-score precision recall support  
AFIB 0.630241 0.702915 0.571270 204.0  
GSVT 0.743119 0.730185 0.756678 300.0  
SB 0.793422 0.789905 0.796978 892.0  
SR 0.775009 0.764412 0.785927 681.0  
macro avg 0.735448 0.746854 0.727713 2077.0  
micro avg 0.765365 0.765365 0.765365 2077.0  
weighted avg 0.764092 0.764376 0.765365 2077.0  
The result of Model Number:Dataset Number:Featuregroup Number:Rescale of 23 : 1 : 9 :  
1

f1-score precision recall support  
AFIB 0.769731 0.763804 0.775809 875.0  
GSVT 0.779725 0.783345 0.776308 691.0  
SB 0.835584 0.831139 0.840094 1553.0  
SR 0.810965 0.822366 0.799964 907.0  
macro avg 0.799001 0.800164 0.798044 4026.0  
micro avg 0.806134 0.806134 0.806134 4026.0  
weighted avg 0.806138 0.806325 0.806134 4026.0  
The result of Model Number:Dataset Number:Featuregroup Number:Rescale of 23 : 1 :  
10 : 0

f1-score precision recall support  
AFIB 0.662044 0.653177 0.671196 875.0  
GSVT 0.676846 0.682129 0.671656 691.0  
SB 0.718621 0.716373 0.720888 1553.0



SR 0.701243 0.710540 0.692200 907.0  
macro avg 0.689689 0.690555 0.688985 4026.0  
micro avg 0.695175 0.695175 0.695175 4026.0  
weighted avg 0.695240 0.695447 0.695175 4026.0  
The result of Model Number:Dataset Number:Featuregroup Number:Rescale of 23 : 1 :  
10 : 1

f1-score precision recall support  
AFIB 0.679614 0.670938 0.688558 875.0  
GSVT 0.691543 0.695509 0.687641 691.0  
SB 0.740254 0.737145 0.743397 1553.0  
SR 0.718458 0.730087 0.707206 907.0  
macro avg 0.707467 0.708420 0.706701 4026.0  
micro avg 0.713755 0.713755 0.713755 4026.0  
weighted avg 0.713804 0.714019 0.713755 4026.0

The result of Model Number:Dataset Number:Featuregroup Number:Rescale of 24 : 0 : 0 :  
0

f1-score precision recall support  
AFIB 0.691413 0.725959 0.660354 204.0  
GSVT 0.712258 0.699058 0.726214 300.0  
SB 0.728558 0.721214 0.736068 892.0  
SR 0.708352 0.714680 0.702200 681.0  
macro avg 0.710145 0.715228 0.706209 2077.0  
micro avg 0.716104 0.716104 0.716104 2077.0  
weighted avg 0.715930 0.716337 0.716104 2077.0

The result of Model Number:Dataset Number:Featuregroup Number:Rescale of 24 : 0 : 0 :  
1

f1-score precision recall support  
AFIB 0.820864 0.825546 0.816372 204.0  
GSVT 0.837754 0.831712 0.843894 300.0  
SB 0.854674 0.851552 0.857834 892.0  
SR 0.845584 0.851136 0.840126 681.0  
macro avg 0.839719 0.839987 0.839556 2077.0  
micro avg 0.845942 0.845942 0.845942 2077.0  
weighted avg 0.845929 0.845996 0.845942 2077.0

The result of Model Number:Dataset Number:Featuregroup Number:Rescale of 24 : 0 : 1 :  
0

f1-score precision recall support  
AFIB 0.673380 0.673164 0.673630 875.0  
GSVT 0.683415 0.674630 0.692511 691.0  
SB 0.722875 0.721303 0.724458 1553.0  
SR 0.702875 0.713178 0.692877 907.0  
macro avg 0.695636 0.695569 0.695869 4026.0  
micro avg 0.700813 0.700813 0.700813 4026.0  
weighted avg 0.700839 0.701000 0.700813 4026.0

The result of Model Number:Dataset Number:Featuregroup Number:Rescale of 24 : 0 : 1 : 1

|              | f1-score | precision | recall   | support |
|--------------|----------|-----------|----------|---------|
| AFIB         | 0.690991 | 0.690368  | 0.691681 | 875.0   |
| GSVT         | 0.702961 | 0.696525  | 0.709573 | 691.0   |
| SB           | 0.737674 | 0.731188  | 0.744276 | 1553.0  |
| SR           | 0.702945 | 0.720323  | 0.686447 | 907.0   |
| macro avg    | 0.708643 | 0.709601  | 0.707994 | 4026.0  |
| micro avg    | 0.713861 | 0.713861  | 0.713861 | 4026.0  |
| weighted avg | 0.713746 | 0.713919  | 0.713861 | 4026.0  |

The result of Model Number:Dataset Number:Featuregroup Number:Rescale of 24 : 0 : 2 : 0

|              | f1-score | precision | recall   | support |
|--------------|----------|-----------|----------|---------|
| AFIB         | 0.738290 | 0.769932  | 0.709427 | 204.0   |
| GSVT         | 0.763099 | 0.751570  | 0.775037 | 300.0   |
| SB           | 0.778235 | 0.770538  | 0.786089 | 892.0   |
| SR           | 0.757150 | 0.763628  | 0.750810 | 681.0   |
| macro avg    | 0.759194 | 0.763917  | 0.755341 | 2077.0  |
| micro avg    | 0.765396 | 0.765396  | 0.765396 | 2077.0  |
| weighted avg | 0.765212 | 0.765473  | 0.765396 | 2077.0  |

The result of Model Number:Dataset Number:Featuregroup Number:Rescale of 24 : 0 : 2 : 1

|              | f1-score | precision | recall   | support |
|--------------|----------|-----------|----------|---------|
| AFIB         | 0.689459 | 0.691377  | 0.687587 | 875.0   |
| GSVT         | 0.705252 | 0.705057  | 0.705455 | 691.0   |
| SB           | 0.751116 | 0.744056  | 0.758319 | 1553.0  |
| SR           | 0.731213 | 0.741758  | 0.720973 | 907.0   |
| macro avg    | 0.719260 | 0.720562  | 0.718084 | 4026.0  |
| micro avg    | 0.725460 | 0.725460  | 0.725460 | 4026.0  |
| weighted avg | 0.725360 | 0.725396  | 0.725460 | 4026.0  |

The result of Model Number:Dataset Number:Featuregroup Number:Rescale of 24 : 0 : 3 : 0

|              | f1-score | precision | recall   | support |
|--------------|----------|-----------|----------|---------|
| AFIB         | 0.623842 | 0.599993  | 0.663084 | 875.0   |
| GSVT         | 0.646406 | 0.624097  | 0.676666 | 691.0   |
| SB           | 0.720216 | 0.707503  | 0.734185 | 1553.0  |
| SR           | 0.610007 | 0.733498  | 0.526658 | 907.0   |
| macro avg    | 0.650118 | 0.666273  | 0.650148 | 4026.0  |
| micro avg    | 0.662107 | 0.662107  | 0.662107 | 4026.0  |
| weighted avg | 0.661774 | 0.675678  | 0.662107 | 4026.0  |

The result of Model Number:Dataset Number:Featuregroup Number:Rescale of 24 : 0 : 3 : 1

|      | f1-score | precision | recall   | support |
|------|----------|-----------|----------|---------|
| AFIB | 0.747000 | 0.724673  | 0.796496 | 875.0   |

GSVT 0.639695 0.625687 0.654582 691.0  
SB 0.848479 0.841566 0.855732 1553.0  
SR 0.795996 0.829415 0.766659 907.0  
macro avg 0.757792 0.755335 0.768367 4026.0  
micro avg 0.788267 0.788267 0.788267 4026.0  
weighted avg 0.778766 0.776371 0.788267 4026.0  
The result of Model Number:Dataset Number:Featuregroup Number:Rescale of 24 : 0 : 4 :  
0

f1-score precision recall support

AFIB 0.857227 0.850627 0.863996 875.0  
GSVT 0.868357 0.872389 0.864552 691.0  
SB 0.930565 0.925615 0.935589 1553.0  
SR 0.903148 0.915846 0.890897 907.0  
macro avg 0.889825 0.891119 0.888759 4026.0  
micro avg 0.897768 0.897768 0.897768 4026.0  
weighted avg 0.897773 0.897981 0.897768 4026.0  
The result of Model Number:Dataset Number:Featuregroup Number:Rescale of 24 : 0 : 4 :  
1

f1-score precision recall support

AFIB 0.808305 0.809214 0.807545 204.0  
GSVT 0.826863 0.825017 0.828781 300.0  
SB 0.844389 0.843262 0.845524 892.0  
SR 0.838065 0.840176 0.835976 681.0  
macro avg 0.829406 0.829417 0.829456 2077.0  
micro avg 0.836245 0.836245 0.836245 2077.0  
weighted avg 0.836240 0.836271 0.836245 2077.0  
The result of Model Number:Dataset Number:Featuregroup Number:Rescale of 24 : 0 : 5 :  
0

f1-score precision recall support

AFIB 0.663464 0.676197 0.651240 875.0  
GSVT 0.707232 0.708311 0.706200 691.0  
SB 0.770085 0.766701 0.773505 1553.0  
SR 0.727706 0.719795 0.735868 907.0  
macro avg 0.717122 0.717751 0.716703 4026.0  
micro avg 0.726901 0.726901 0.726901 4026.0  
weighted avg 0.726577 0.726442 0.726901 4026.0  
The result of Model Number:Dataset Number:Featuregroup Number:Rescale of 24 : 0 : 5 :  
1

f1-score precision recall support

AFIB 0.784548 0.819416 0.752634 204.0  
GSVT 0.817241 0.810826 0.823777 300.0  
SB 0.829725 0.823324 0.836233 892.0  
SR 0.820545 0.821900 0.819224 681.0  
macro avg 0.813015 0.818867 0.807967 2077.0

micro avg 0.820646 0.820646 0.820646 2077.0  
weighted avg 0.820475 0.820668 0.820646 2077.0  
The result of Model Number:Dataset Number:Featuregroup Number:Rescale of 24 : 0 : 6 :  
0

|              | f1-score | precision | recall   | support |
|--------------|----------|-----------|----------|---------|
| AFIB         | 0.617520 | 0.672692  | 0.652115 | 204.0   |
| GSVT         | 0.838763 | 0.825052  | 0.853227 | 300.0   |
| SB           | 0.714047 | 0.708608  | 0.719623 | 892.0   |
| SR           | 0.873163 | 0.863283  | 0.883297 | 681.0   |
| macro avg    | 0.760873 | 0.767409  | 0.777065 | 2077.0  |
| micro avg    | 0.785955 | 0.785955  | 0.785955 | 2077.0  |
| weighted avg | 0.774750 | 0.772614  | 0.785955 | 2077.0  |

The result of Model Number:Dataset Number:Featuregroup Number:Rescale of 24 : 0 : 6 :  
1

|              | f1-score | precision | recall   | support |
|--------------|----------|-----------|----------|---------|
| AFIB         | 0.720609 | 0.799728  | 0.655908 | 204.0   |
| GSVT         | 0.841408 | 0.830889  | 0.852362 | 300.0   |
| SB           | 0.895217 | 0.890649  | 0.899833 | 892.0   |
| SR           | 0.874246 | 0.862023  | 0.886824 | 681.0   |
| macro avg    | 0.832870 | 0.845822  | 0.823732 | 2077.0  |
| micro avg    | 0.864753 | 0.864753  | 0.864753 | 2077.0  |
| weighted avg | 0.863419 | 0.863701  | 0.864753 | 2077.0  |

The result of Model Number:Dataset Number:Featuregroup Number:Rescale of 24 : 0 : 7 :  
0

|              | f1-score | precision | recall   | support |
|--------------|----------|-----------|----------|---------|
| AFIB         | 0.760314 | 0.750607  | 0.770320 | 875.0   |
| GSVT         | 0.773660 | 0.778096  | 0.769294 | 691.0   |
| SB           | 0.828155 | 0.824677  | 0.831670 | 1553.0  |
| SR           | 0.803770 | 0.816780  | 0.791183 | 907.0   |
| macro avg    | 0.791475 | 0.792540  | 0.790617 | 4026.0  |
| micro avg    | 0.798509 | 0.798509  | 0.798509 | 4026.0  |
| weighted avg | 0.798564 | 0.798805  | 0.798509 | 4026.0  |

The result of Model Number:Dataset Number:Featuregroup Number:Rescale of 24 : 0 : 7 :  
1

|              | f1-score | precision | recall   | support |
|--------------|----------|-----------|----------|---------|
| AFIB         | 0.917812 | 0.946080  | 0.891368 | 204.0   |
| GSVT         | 0.941226 | 0.929704  | 0.953141 | 300.0   |
| SB           | 0.966792 | 0.961047  | 0.972637 | 892.0   |
| SR           | 0.950496 | 0.955184  | 0.945890 | 681.0   |
| macro avg    | 0.944081 | 0.948004  | 0.940759 | 2077.0  |
| micro avg    | 0.953069 | 0.953069  | 0.953069 | 2077.0  |
| weighted avg | 0.952945 | 0.953127  | 0.953069 | 2077.0  |

The result of Model Number:Dataset Number:Featuregroup Number:Rescale of 24 : 0 : 8 :  
0

f1-score precision recall support  
AFIB 0.843205 0.865486 0.822125 204.0  
GSVT 0.866329 0.859132 0.873806 300.0  
SB 0.890201 0.886935 0.893495 892.0  
SR 0.876418 0.877480 0.875382 681.0  
macro avg 0.869038 0.872258 0.866202 2077.0  
micro avg 0.877702 0.877702 0.877702 2077.0  
weighted avg 0.877618 0.877712 0.877702 2077.0  
The result of Model Number:Dataset Number:Featuregroup Number:Rescale of 24 : 0 : 8 :  
1

f1-score precision recall support  
AFIB 0.743598 0.757246 0.730793 204.0  
GSVT 0.771827 0.765621 0.778275 300.0  
SB 0.786144 0.784741 0.787554 892.0  
SR 0.778360 0.779053 0.777673 681.0  
macro avg 0.769982 0.771665 0.768574 2077.0  
micro avg 0.777399 0.777399 0.777399 2077.0  
weighted avg 0.777345 0.777414 0.777399 2077.0  
The result of Model Number:Dataset Number:Featuregroup Number:Rescale of 24 : 0 : 9 :  
0

f1-score precision recall support  
AFIB 0.679161 0.687588 0.671166 204.0  
GSVT 0.691339 0.686616 0.696201 300.0  
SB 0.707711 0.706605 0.708820 892.0  
SR 0.702627 0.703766 0.701497 681.0  
macro avg 0.695210 0.696144 0.694421 2077.0  
micro avg 0.700898 0.700898 0.700898 2077.0  
weighted avg 0.700875 0.700919 0.700898 2077.0  
The result of Model Number:Dataset Number:Featuregroup Number:Rescale of 24 : 0 : 9 :  
1

f1-score precision recall support  
AFIB 0.693863 0.709297 0.679234 204.0  
GSVT 0.723425 0.718929 0.728005 300.0  
SB 0.739129 0.737572 0.740701 892.0  
SR 0.731256 0.730739 0.731797 681.0  
macro avg 0.721918 0.724134 0.719934 2077.0  
micro avg 0.729911 0.729911 0.729911 2077.0  
weighted avg 0.729833 0.729862 0.729911 2077.0  
The result of Model Number:Dataset Number:Featuregroup Number:Rescale of 24 : 0 :  
10 : 0

f1-score precision recall support  
AFIB 0.142771 0.144270 0.141302 175.0  
GSVT 0.143001 0.141482 0.144553 138.2  
SB 0.150605 0.150027 0.151187 310.6

SR 0.147119 0.147857 0.146390 181.4  
macro avg 0.145874 0.145909 0.145858 805.2  
micro avg 0.146819 0.146819 0.146819 805.2  
weighted avg 0.146812 0.146820 0.146819 805.2  
The result of Model Number:Dataset Number:Featuregroup Number:Rescale of 24 : 0 :

10 : 1

f1-score precision recall support

AFIB 0.675495 0.670464 0.680669 875.0  
GSVT 0.688093 0.690550 0.685695 691.0  
SB 0.730151 0.728421 0.731890 1553.0  
SR 0.713488 0.719912 0.707204 907.0  
macro avg 0.701807 0.702337 0.701364 4026.0  
micro avg 0.707268 0.707268 0.707268 4026.0  
weighted avg 0.707300 0.707408 0.707268 4026.0

The result of Model Number:Dataset Number:Featuregroup Number:Rescale of 24 : 1 : 0 :  
0

f1-score precision recall support

AFIB 0.852847 0.869489 0.836977 204.0  
GSVT 0.874103 0.862824 0.885739 300.0  
SB 0.888980 0.880192 0.897950 892.0  
SR 0.870399 0.882492 0.858638 681.0  
macro avg 0.871582 0.873749 0.869826 2077.0  
micro avg 0.877308 0.877308 0.877308 2077.0  
weighted avg 0.877190 0.877386 0.877308 2077.0

The result of Model Number:Dataset Number:Featuregroup Number:Rescale of 24 : 1 : 0 :  
1

f1-score precision recall support

AFIB 0.883211 0.900929 0.866353 204.0  
GSVT 0.903680 0.894287 0.913321 300.0  
SB 0.920393 0.916813 0.924004 892.0  
SR 0.910722 0.914522 0.906974 681.0  
macro avg 0.904502 0.906638 0.902663 2077.0  
micro avg 0.911215 0.911215 0.911215 2077.0  
weighted avg 0.911156 0.911248 0.911215 2077.0

The result of Model Number:Dataset Number:Featuregroup Number:Rescale of 24 : 1 : 1 :  
0

f1-score precision recall support

AFIB 0.834094 0.879812 0.793448 204.0  
GSVT 0.794235 0.822081 0.768311 300.0  
SB 0.816949 0.785440 0.851105 892.0  
SR 0.727106 0.746833 0.708437 681.0  
macro avg 0.793096 0.808541 0.780325 2077.0  
micro avg 0.786706 0.786706 0.786706 2077.0  
weighted avg 0.785895 0.787343 0.786706 2077.0

The result of Model Number:Dataset Number:Featuregroup Number:Rescale of 24 : 1 : 1 : 1

|              | f1-score | precision | recall   | support |
|--------------|----------|-----------|----------|---------|
| AFIB         | 0.853775 | 0.853552  | 0.854081 | 875.0   |
| GSVT         | 0.871611 | 0.868315  | 0.875025 | 691.0   |
| SB           | 0.927961 | 0.923771  | 0.932203 | 1553.0  |
| SR           | 0.896687 | 0.906932  | 0.886706 | 907.0   |
| macro avg    | 0.887509 | 0.888143  | 0.887004 | 4026.0  |
| micro avg    | 0.895161 | 0.895161  | 0.895161 | 4026.0  |
| weighted avg | 0.895121 | 0.895198  | 0.895161 | 4026.0  |

The result of Model Number:Dataset Number:Featuregroup Number:Rescale of 24 : 1 : 2 : 0

|              | f1-score | precision | recall   | support |
|--------------|----------|-----------|----------|---------|
| AFIB         | 0.720094 | 0.725802  | 0.714494 | 875.0   |
| GSVT         | 0.729224 | 0.726009  | 0.732492 | 691.0   |
| SB           | 0.775443 | 0.772378  | 0.778539 | 1553.0  |
| SR           | 0.756388 | 0.758525  | 0.754299 | 907.0   |
| macro avg    | 0.745287 | 0.745678  | 0.744956 | 4026.0  |
| micro avg    | 0.751255 | 0.751255  | 0.751255 | 4026.0  |
| weighted avg | 0.751188 | 0.751176  | 0.751255 | 4026.0  |

The result of Model Number:Dataset Number:Featuregroup Number:Rescale of 24 : 1 : 2 : 1

|              | f1-score | precision | recall   | support |
|--------------|----------|-----------|----------|---------|
| AFIB         | 0.853222 | 0.857905  | 0.848645 | 875.0   |
| GSVT         | 0.854415 | 0.843613  | 0.865632 | 691.0   |
| SB           | 0.898565 | 0.894960  | 0.902208 | 1553.0  |
| SR           | 0.879276 | 0.889950  | 0.868910 | 907.0   |
| macro avg    | 0.871370 | 0.871607  | 0.871349 | 4026.0  |
| micro avg    | 0.876787 | 0.876787  | 0.876787 | 4026.0  |
| weighted avg | 0.876787 | 0.876965  | 0.876787 | 4026.0  |

The result of Model Number:Dataset Number:Featuregroup Number:Rescale of 24 : 1 : 3 : 0

|              | f1-score | precision | recall   | support |
|--------------|----------|-----------|----------|---------|
| AFIB         | 0.924354 | 0.942162  | 0.907644 | 204.0   |
| GSVT         | 0.941712 | 0.926411  | 0.957698 | 300.0   |
| SB           | 0.957434 | 0.946015  | 0.969134 | 892.0   |
| SR           | 0.939623 | 0.957240  | 0.922659 | 681.0   |
| macro avg    | 0.940781 | 0.942957  | 0.939284 | 2077.0  |
| micro avg    | 0.946205 | 0.946205  | 0.946205 | 2077.0  |
| weighted avg | 0.946074 | 0.946485  | 0.946205 | 2077.0  |

The result of Model Number:Dataset Number:Featuregroup Number:Rescale of 24 : 1 : 3 : 1

|      | f1-score | precision | recall   | support |
|------|----------|-----------|----------|---------|
| AFIB | 0.745398 | 0.759078  | 0.732561 | 204.0   |

GSVT 0.773694 0.767473 0.780158 300.0  
SB 0.788046 0.786640 0.789460 892.0  
SR 0.780244 0.780938 0.779554 681.0  
macro avg 0.771845 0.773532 0.770433 2077.0  
micro avg 0.779280 0.779280 0.779280 2077.0  
weighted avg 0.779226 0.779295 0.779280 2077.0  
The result of Model Number:Dataset Number:Featuregroup Number:Rescale of 24 : 1 : 4 :  
0

f1-score precision recall support  
AFIB 0.832942 0.828771 0.837430 875.0  
GSVT 0.851762 0.852914 0.850785 691.0  
SB 0.907010 0.904023 0.910041 1553.0  
SR 0.880373 0.889510 0.871526 907.0  
macro avg 0.868022 0.868805 0.867445 4026.0  
micro avg 0.875413 0.875413 0.875413 4026.0  
weighted avg 0.875429 0.875627 0.875413 4026.0  
The result of Model Number:Dataset Number:Featuregroup Number:Rescale of 24 : 1 : 4 :  
1

f1-score precision recall support  
AFIB 0.820674 0.855847 0.788590 204.0  
GSVT 0.848252 0.835435 0.861521 300.0  
SB 0.865076 0.856521 0.873806 892.0  
SR 0.841639 0.848839 0.834591 681.0  
macro avg 0.843910 0.849161 0.839627 2077.0  
micro avg 0.850804 0.850804 0.850804 2077.0  
weighted avg 0.850600 0.850891 0.850804 2077.0  
The result of Model Number:Dataset Number:Featuregroup Number:Rescale of 24 : 1 : 5 :  
0

f1-score precision recall support  
AFIB 0.898842 0.935121 0.865344 204.0  
GSVT 0.932291 0.917146 0.948104 300.0  
SB 0.956409 0.948720 0.964236 892.0  
SR 0.930678 0.937380 0.924121 681.0  
macro avg 0.929555 0.934592 0.925451 2077.0  
micro avg 0.939040 0.939040 0.939040 2077.0  
weighted avg 0.938835 0.939106 0.939040 2077.0  
The result of Model Number:Dataset Number:Featuregroup Number:Rescale of 24 : 1 : 5 :  
1

f1-score precision recall support  
AFIB 0.596709 0.601651 0.672111 204.0  
GSVT 0.647091 0.619394 0.730070 300.0  
SB 0.590818 0.588765 0.592887 892.0  
SR 0.584943 0.585054 0.584837 681.0  
macro avg 0.604890 0.598716 0.644976 2077.0



micro avg 0.617843 0.617843 0.617843 2077.0  
weighted avg 0.597598 0.593238 0.617843 2077.0  
The result of Model Number:Dataset Number:Featuregroup Number:Rescale of 24 : 1 : 6 :  
0

|              | f1-score | precision | recall   | support |
|--------------|----------|-----------|----------|---------|
| AFIB         | 0.862701 | 0.875638  | 0.850386 | 204.0   |
| GSVT         | 0.893854 | 0.891481  | 0.896246 | 300.0   |
| SB           | 0.915028 | 0.913808  | 0.916258 | 892.0   |
| SR           | 0.906078 | 0.904910  | 0.907279 | 681.0   |
| macro avg    | 0.894415 | 0.896459  | 0.892542 | 2077.0  |
| micro avg    | 0.903954 | 0.903954  | 0.903954 | 2077.0  |
| weighted avg | 0.903896 | 0.903917  | 0.903954 | 2077.0  |

The result of Model Number:Dataset Number:Featuregroup Number:Rescale of 24 : 1 : 6 :  
1

|              | f1-score | precision | recall   | support |
|--------------|----------|-----------|----------|---------|
| AFIB         | 0.743259 | 0.805306  | 0.691570 | 204.0   |
| GSVT         | 0.797231 | 0.787206  | 0.807839 | 300.0   |
| SB           | 0.817583 | 0.806129  | 0.829463 | 892.0   |
| SR           | 0.795281 | 0.799007  | 0.791978 | 681.0   |
| macro avg    | 0.788338 | 0.799412  | 0.780212 | 2077.0  |
| micro avg    | 0.800505 | 0.800505  | 0.800505 | 2077.0  |
| weighted avg | 0.800031 | 0.800980  | 0.800505 | 2077.0  |

The result of Model Number:Dataset Number:Featuregroup Number:Rescale of 24 : 1 : 7 :  
0

|              | f1-score | precision | recall   | support |
|--------------|----------|-----------|----------|---------|
| AFIB         | 0.704312 | 0.777981  | 0.643595 | 204.0   |
| GSVT         | 0.828575 | 0.817635  | 0.839900 | 300.0   |
| SB           | 0.878700 | 0.875286  | 0.882148 | 892.0   |
| SR           | 0.857586 | 0.845363  | 0.870176 | 681.0   |
| macro avg    | 0.817293 | 0.829066  | 0.808955 | 2077.0  |
| micro avg    | 0.848690 | 0.848690  | 0.848690 | 2077.0  |
| weighted avg | 0.847409 | 0.847591  | 0.848690 | 2077.0  |

The result of Model Number:Dataset Number:Featuregroup Number:Rescale of 24 : 1 : 7 :  
1

|              | f1-score | precision | recall   | support |
|--------------|----------|-----------|----------|---------|
| AFIB         | 0.887557 | 0.903526  | 0.872404 | 204.0   |
| GSVT         | 0.907580 | 0.894819  | 0.920861 | 300.0   |
| SB           | 0.921545 | 0.910656  | 0.932701 | 892.0   |
| SR           | 0.903011 | 0.919088  | 0.887497 | 681.0   |
| macro avg    | 0.904923 | 0.907022  | 0.903366 | 2077.0  |
| micro avg    | 0.910247 | 0.910247  | 0.910247 | 2077.0  |
| weighted avg | 0.910113 | 0.910433  | 0.910247 | 2077.0  |

The result of Model Number:Dataset Number:Featuregroup Number:Rescale of 24 : 1 : 8 :  
0

f1-score precision recall support  
AFIB 0.886419 0.878493 0.894528 875.0  
GSVT 0.900651 0.904214 0.897148 691.0  
SB 0.960287 0.958504 0.962079 1553.0  
SR 0.935953 0.944605 0.927493 907.0  
macro avg 0.920827 0.921454 0.920312 4026.0  
micro avg 0.928461 0.928461 0.928461 4026.0  
weighted avg 0.928515 0.928666 0.928461 4026.0  
The result of Model Number:Dataset Number:Featuregroup Number:Rescale of 24 : 1 : 8 :  
1

f1-score precision recall support  
AFIB 0.884001 0.934290 0.839437 204.0  
GSVT 0.934190 0.923903 0.944756 300.0  
SB 0.948087 0.938653 0.957744 892.0  
SR 0.937073 0.940276 0.934039 681.0  
macro avg 0.925838 0.934280 0.918994 2077.0  
micro avg 0.936476 0.936476 0.936476 2077.0  
weighted avg 0.936174 0.936626 0.936476 2077.0  
The result of Model Number:Dataset Number:Featuregroup Number:Rescale of 24 : 1 : 9 :  
0

f1-score precision recall support  
AFIB 0.691532 0.707185 0.676646 204.0  
GSVT 0.709935 0.706459 0.713476 300.0  
SB 0.724458 0.722366 0.726568 892.0  
SR 0.719804 0.719493 0.720126 681.0  
macro avg 0.711432 0.713876 0.709204 2077.0  
micro avg 0.717662 0.717662 0.717662 2077.0  
weighted avg 0.717601 0.717635 0.717662 2077.0  
The result of Model Number:Dataset Number:Featuregroup Number:Rescale of 24 : 1 : 9 :  
1

f1-score precision recall support  
AFIB 0.645397 0.630217 0.679461 875.0  
GSVT 0.620168 0.614450 0.634299 691.0  
SB 0.672614 0.625254 0.728511 1553.0  
SR 0.419383 0.525974 0.349254 907.0  
macro avg 0.589390 0.598974 0.597881 4026.0  
micro avg 0.616240 0.616240 0.616240 4026.0  
weighted avg 0.600648 0.602112 0.616240 4026.0  
The result of Model Number:Dataset Number:Featuregroup Number:Rescale of 24 : 1 :  
10 : 0

f1-score precision recall support  
AFIB 0.628365 0.621576 0.715288 204.0  
GSVT 0.751798 0.745940 0.757813 300.0  
SB 0.613539 0.612256 0.614828 892.0

SR 0.760802 0.760588 0.761025 681.0  
macro avg 0.688626 0.685090 0.712238 2077.0  
micro avg 0.693282 0.693282 0.693282 2077.0  
weighted avg 0.683249 0.681115 0.693282 2077.0  
The result of Model Number:Dataset Number:Featuregroup Number:Rescale of 24 : 1 :  
10 : 1

f1-score precision recall support  
AFIB 0.811773 0.817242 0.806497 875.0  
GSVT 0.826260 0.814784 0.838216 691.0  
SB 0.880471 0.874441 0.886591 1553.0  
SR 0.844790 0.859382 0.830731 907.0  
macro avg 0.840824 0.841463 0.840509 4026.0  
micro avg 0.848296 0.848296 0.848296 4026.0  
weighted avg 0.848197 0.848378 0.848296 4026.0

The result of Model Number:Dataset Number:Featuregroup Number:Rescale of 25 : 0 : 0 :  
0

f1-score precision recall support  
AFIB 0.874143 0.880857 0.867728 204.0  
GSVT 0.904926 0.904058 0.905824 300.0  
SB 0.923439 0.921288 0.925610 892.0  
SR 0.914941 0.916174 0.913731 681.0  
macro avg 0.904362 0.905594 0.903223 2077.0  
micro avg 0.913172 0.913172 0.913172 2077.0  
weighted avg 0.913137 0.913152 0.913172 2077.0

The result of Model Number:Dataset Number:Featuregroup Number:Rescale of 25 : 0 : 0 :  
1

f1-score precision recall support  
AFIB 0.693572 0.699621 0.687800 204.0  
GSVT 0.717558 0.716386 0.718751 300.0  
SB 0.732810 0.731023 0.734615 892.0  
SR 0.726092 0.727186 0.725025 681.0  
macro avg 0.717508 0.718554 0.716548 2077.0  
micro avg 0.724581 0.724581 0.724581 2077.0  
weighted avg 0.724550 0.724567 0.724581 2077.0

The result of Model Number:Dataset Number:Featuregroup Number:Rescale of 25 : 0 : 1 :  
0

f1-score precision recall support  
AFIB 0.833554 0.848893 0.819184 204.0  
GSVT 0.864308 0.857069 0.871820 300.0  
SB 0.880537 0.879062 0.882018 892.0  
SR 0.872762 0.873538 0.871994 681.0  
macro avg 0.862790 0.864640 0.861254 2077.0  
micro avg 0.871087 0.871087 0.871087 2077.0  
weighted avg 0.871029 0.871111 0.871087 2077.0

The result of Model Number:Dataset Number:Featuregroup Number:Rescale of 25 : 0 : 1 :  
1

|              | f1-score | precision | recall   | support |
|--------------|----------|-----------|----------|---------|
| AFIB         | 0.656874 | 0.637949  | 0.720717 | 875.0   |
| GSVT         | 0.723963 | 0.721651  | 0.726384 | 691.0   |
| SB           | 0.611132 | 0.602125  | 0.620461 | 1553.0  |
| SR           | 0.731757 | 0.746040  | 0.718103 | 907.0   |
| macro avg    | 0.680932 | 0.676941  | 0.696416 | 4026.0  |
| micro avg    | 0.682428 | 0.682428  | 0.682428 | 4026.0  |
| weighted avg | 0.667614 | 0.662848  | 0.682428 | 4026.0  |

The result of Model Number:Dataset Number:Featuregroup Number:Rescale of 25 : 0 : 2 :  
0

|              | f1-score | precision | recall   | support |
|--------------|----------|-----------|----------|---------|
| AFIB         | 0.622881 | 0.635818  | 0.610604 | 875.0   |
| GSVT         | 0.607433 | 0.586335  | 0.657017 | 691.0   |
| SB           | 0.715955 | 0.712726  | 0.719224 | 1553.0  |
| SR           | 0.544303 | 0.535515  | 0.553433 | 907.0   |
| macro avg    | 0.622643 | 0.617599  | 0.635069 | 4026.0  |
| micro avg    | 0.647590 | 0.647590  | 0.647590 | 4026.0  |
| weighted avg | 0.638429 | 0.634395  | 0.647590 | 4026.0  |

The result of Model Number:Dataset Number:Featuregroup Number:Rescale of 25 : 0 : 2 :  
1

|              | f1-score | precision | recall   | support |
|--------------|----------|-----------|----------|---------|
| AFIB         | 0.775940 | 0.785013  | 0.767218 | 204.0   |
| GSVT         | 0.699901 | 0.673180  | 0.798577 | 300.0   |
| SB           | 0.649365 | 0.647835  | 0.650909 | 892.0   |
| SR           | 0.806293 | 0.807843  | 0.804755 | 681.0   |
| macro avg    | 0.732875 | 0.728468  | 0.755365 | 2077.0  |
| micro avg    | 0.734104 | 0.734104  | 0.734104 | 2077.0  |
| weighted avg | 0.720550 | 0.717432  | 0.734104 | 2077.0  |

The result of Model Number:Dataset Number:Featuregroup Number:Rescale of 25 : 0 : 3 :  
0

|              | f1-score | precision | recall   | support |
|--------------|----------|-----------|----------|---------|
| AFIB         | 0.764657 | 0.764793  | 0.764554 | 875.0   |
| GSVT         | 0.772747 | 0.775358  | 0.770203 | 691.0   |
| SB           | 0.811731 | 0.808932  | 0.814553 | 1553.0  |
| SR           | 0.796317 | 0.799003  | 0.793678 | 907.0   |
| macro avg    | 0.786363 | 0.787022  | 0.785747 | 4026.0  |
| micro avg    | 0.791372 | 0.791372  | 0.791372 | 4026.0  |
| weighted avg | 0.791336 | 0.791340  | 0.791372 | 4026.0  |

The result of Model Number:Dataset Number:Featuregroup Number:Rescale of 25 : 0 : 3 :  
1

|      | f1-score | precision | recall   | support |
|------|----------|-----------|----------|---------|
| AFIB | 0.833869 | 0.833118  | 0.834702 | 875.0   |

GSVT 0.848315 0.840548 0.856294 691.0  
SB 0.890206 0.882379 0.898173 1553.0  
SR 0.848296 0.869267 0.828386 907.0  
macro avg 0.855171 0.856328 0.854389 4026.0  
micro avg 0.861469 0.861469 0.861469 4026.0  
weighted avg 0.861330 0.861539 0.861469 4026.0  
The result of Model Number:Dataset Number:Featuregroup Number:Rescale of 25 : 0 : 4 :  
0

f1-score precision recall support  
AFIB 0.682512 0.689939 0.675443 204.0  
GSVT 0.705609 0.702667 0.708691 300.0  
SB 0.720069 0.719424 0.720714 892.0  
SR 0.713264 0.713270 0.713264 681.0  
macro avg 0.705363 0.706325 0.704528 2077.0  
micro avg 0.712088 0.712088 0.712088 2077.0  
weighted avg 0.712060 0.712090 0.712088 2077.0  
The result of Model Number:Dataset Number:Featuregroup Number:Rescale of 25 : 0 : 4 :  
1

f1-score precision recall support  
AFIB 0.640629 0.641704 0.656507 204.0  
GSVT 0.634606 0.659233 0.612571 300.0  
SB 0.673138 0.636222 0.714877 892.0  
SR 0.583467 0.637313 0.539488 681.0  
macro avg 0.632960 0.643618 0.630861 2077.0  
micro avg 0.636861 0.636861 0.636861 2077.0  
weighted avg 0.634978 0.640442 0.636861 2077.0  
The result of Model Number:Dataset Number:Featuregroup Number:Rescale of 25 : 0 : 5 :  
0

f1-score precision recall support  
AFIB 0.680209 0.685146 0.675392 875.0  
GSVT 0.695130 0.688669 0.701766 691.0  
SB 0.747061 0.742551 0.751631 1553.0  
SR 0.722577 0.730645 0.714688 907.0  
macro avg 0.711244 0.711753 0.710869 4026.0  
micro avg 0.718180 0.718180 0.718180 4026.0  
weighted avg 0.718103 0.718145 0.718180 4026.0  
The result of Model Number:Dataset Number:Featuregroup Number:Rescale of 25 : 0 : 5 :  
1

f1-score precision recall support  
AFIB 0.687577 0.693128 0.682173 204.0  
GSVT 0.703354 0.699905 0.706861 300.0  
SB 0.717081 0.716286 0.717884 892.0  
SR 0.711727 0.712673 0.710787 681.0  
macro avg 0.704935 0.705498 0.704427 2077.0

micro avg 0.710458 0.710458 0.710458 2077.0  
weighted avg 0.710445 0.710461 0.710458 2077.0  
The result of Model Number:Dataset Number:Featuregroup Number:Rescale of 25 : 0 : 6 :  
0

|              | f1-score | precision | recall   | support |
|--------------|----------|-----------|----------|---------|
| AFIB         | 0.660219 | 0.662154  | 0.658345 | 875.0   |
| GSVT         | 0.671143 | 0.662523  | 0.680077 | 691.0   |
| SB           | 0.710293 | 0.708567  | 0.712031 | 1553.0  |
| SR           | 0.692307 | 0.700523  | 0.684289 | 907.0   |
| macro avg    | 0.683491 | 0.683442  | 0.683686 | 4026.0  |
| micro avg    | 0.688629 | 0.688629  | 0.688629 | 4026.0  |
| weighted avg | 0.688639 | 0.688765  | 0.688629 | 4026.0  |

The result of Model Number:Dataset Number:Featuregroup Number:Rescale of 25 : 0 : 6 :  
1

|              | f1-score | precision | recall   | support |
|--------------|----------|-----------|----------|---------|
| AFIB         | 0.736531 | 0.740927  | 0.732206 | 204.0   |
| GSVT         | 0.754628 | 0.751388  | 0.757898 | 300.0   |
| SB           | 0.767552 | 0.766440  | 0.768670 | 892.0   |
| SR           | 0.760534 | 0.762105  | 0.758973 | 681.0   |
| macro avg    | 0.754811 | 0.755215  | 0.754437 | 2077.0  |
| micro avg    | 0.760353 | 0.760353  | 0.760353 | 2077.0  |
| weighted avg | 0.760337 | 0.760339  | 0.760353 | 2077.0  |

The result of Model Number:Dataset Number:Featuregroup Number:Rescale of 25 : 0 : 7 :  
0

|              | f1-score | precision | recall   | support |
|--------------|----------|-----------|----------|---------|
| AFIB         | 0.727244 | 0.725407  | 0.729204 | 875.0   |
| GSVT         | 0.741432 | 0.737356  | 0.745594 | 691.0   |
| SB           | 0.776338 | 0.771658  | 0.781086 | 1553.0  |
| SR           | 0.753448 | 0.767047  | 0.740337 | 907.0   |
| macro avg    | 0.749616 | 0.750367  | 0.749055 | 4026.0  |
| micro avg    | 0.754538 | 0.754538  | 0.754538 | 4026.0  |
| weighted avg | 0.754520 | 0.754679  | 0.754538 | 4026.0  |

The result of Model Number:Dataset Number:Featuregroup Number:Rescale of 25 : 0 : 7 :  
1

|              | f1-score | precision | recall   | support |
|--------------|----------|-----------|----------|---------|
| AFIB         | 0.749263 | 0.750443  | 0.748185 | 204.0   |
| GSVT         | 0.767384 | 0.766187  | 0.768650 | 300.0   |
| SB           | 0.783214 | 0.782259  | 0.784178 | 892.0   |
| SR           | 0.777730 | 0.779222  | 0.776246 | 681.0   |
| macro avg    | 0.769398 | 0.769528  | 0.769315 | 2077.0  |
| micro avg    | 0.775799 | 0.775799  | 0.775799 | 2077.0  |
| weighted avg | 0.775795 | 0.775817  | 0.775799 | 2077.0  |

The result of Model Number:Dataset Number:Featuregroup Number:Rescale of 25 : 0 : 8 :  
0

f1-score precision recall support  
AFIB 0.772451 0.801187 0.746052 204.0  
GSVT 0.716806 0.750069 0.686434 300.0  
SB 0.750883 0.705593 0.802398 892.0  
SR 0.659420 0.705236 0.619271 681.0  
macro avg 0.724890 0.740521 0.713539 2077.0  
micro avg 0.720071 0.720071 0.720071 2077.0  
weighted avg 0.718091 0.721289 0.720071 2077.0  
The result of Model Number:Dataset Number:Featuregroup Number:Rescale of 25 : 0 : 8 :  
1

f1-score precision recall support  
AFIB 0.861889 0.865825 0.858035 875.0  
GSVT 0.876257 0.868846 0.883859 691.0  
SB 0.926221 0.916763 0.935882 1553.0  
SR 0.878419 0.896937 0.860697 907.0  
macro avg 0.885697 0.887093 0.884618 4026.0  
micro avg 0.893096 0.893096 0.893096 4026.0  
weighted avg 0.892895 0.893002 0.893096 4026.0  
The result of Model Number:Dataset Number:Featuregroup Number:Rescale of 25 : 0 : 9 :  
0

f1-score precision recall support  
AFIB 0.765346 0.749889 0.781513 875.0  
GSVT 0.790720 0.803292 0.778706 691.0  
SB 0.841338 0.841291 0.841392 1553.0  
SR 0.820939 0.828420 0.813606 907.0  
macro avg 0.804586 0.805723 0.803804 4026.0  
micro avg 0.811359 0.811359 0.811359 4026.0  
weighted avg 0.811539 0.812004 0.811359 4026.0  
The result of Model Number:Dataset Number:Featuregroup Number:Rescale of 25 : 0 : 9 :  
1

f1-score precision recall support  
AFIB 0.749693 0.743921 0.755613 875.0  
GSVT 0.759427 0.762953 0.756099 691.0  
SB 0.813831 0.809502 0.818225 1553.0  
SR 0.789853 0.800958 0.779139 907.0  
macro avg 0.778201 0.779333 0.777269 4026.0  
micro avg 0.785149 0.785149 0.785149 4026.0  
weighted avg 0.785152 0.785335 0.785149 4026.0  
The result of Model Number:Dataset Number:Featuregroup Number:Rescale of 25 : 0 :  
10 : 0

f1-score precision recall support  
AFIB 0.830975 0.833652 0.828393 875.0  
GSVT 0.842658 0.829280 0.856551 691.0  
SB 0.887877 0.880464 0.895423 1553.0

SR 0.843246 0.864663 0.822896 907.0  
macro avg 0.851189 0.852015 0.850816 4026.0  
micro avg 0.857844 0.857844 0.857844 4026.0  
weighted avg 0.857694 0.857945 0.857844 4026.0  
The result of Model Number:Dataset Number:Featuregroup Number:Rescale of 25 : 0 :

10 : 1

f1-score precision recall support

AFIB 0.862478 0.899832 0.828347 204.0  
GSVT 0.806268 0.813792 0.799286 300.0  
SB 0.835755 0.794665 0.881384 892.0  
SR 0.744884 0.791892 0.703385 681.0  
macro avg 0.812346 0.825045 0.803100 2077.0  
micro avg 0.805955 0.805955 0.805955 2077.0  
weighted avg 0.804326 0.806848 0.805955 2077.0

The result of Model Number:Dataset Number:Featuregroup Number:Rescale of 25 : 1 : 0 :  
0

f1-score precision recall support

AFIB 0.730735 0.757827 0.705617 204.0  
GSVT 0.752627 0.743216 0.762374 300.0  
SB 0.771712 0.764670 0.778891 892.0  
SR 0.751423 0.757254 0.745688 681.0  
macro avg 0.751624 0.755742 0.748143 2077.0  
micro avg 0.758422 0.758422 0.758422 2077.0  
weighted avg 0.758278 0.758468 0.758422 2077.0

The result of Model Number:Dataset Number:Featuregroup Number:Rescale of 25 : 1 : 0 :  
1

f1-score precision recall support

AFIB 0.722991 0.729459 0.716727 875.0  
GSVT 0.736800 0.722790 0.751505 691.0  
SB 0.782052 0.775276 0.788949 1553.0  
SR 0.749931 0.767174 0.733479 907.0  
macro avg 0.747943 0.748675 0.747665 4026.0  
micro avg 0.754329 0.754329 0.754329 4026.0  
weighted avg 0.754212 0.754485 0.754329 4026.0

The result of Model Number:Dataset Number:Featuregroup Number:Rescale of 25 : 1 : 1 :  
0

f1-score precision recall support

AFIB 0.849597 0.853808 0.845519 875.0  
GSVT 0.858057 0.859293 0.856954 691.0  
SB 0.903220 0.899030 0.907460 1553.0  
SR 0.886593 0.888814 0.884433 907.0  
macro avg 0.874367 0.875236 0.873592 4026.0  
micro avg 0.880142 0.880142 0.880142 4026.0  
weighted avg 0.880069 0.880080 0.880142 4026.0



The result of Model Number:Dataset Number:Featuregroup Number:Rescale of 25 : 1 : 1 :  
1

|              | f1-score | precision | recall   | support |
|--------------|----------|-----------|----------|---------|
| AFIB         | 0.671493 | 0.673034  | 0.670032 | 875.0   |
| GSVT         | 0.673834 | 0.671934  | 0.675767 | 691.0   |
| SB           | 0.707178 | 0.701322  | 0.713143 | 1553.0  |
| SR           | 0.685963 | 0.696258  | 0.675997 | 907.0   |
| macro avg    | 0.684617 | 0.685637  | 0.683735 | 4026.0  |
| micro avg    | 0.688990 | 0.688990  | 0.688990 | 4026.0  |
| weighted avg | 0.688920 | 0.688989  | 0.688990 | 4026.0  |

The result of Model Number:Dataset Number:Featuregroup Number:Rescale of 25 : 1 : 2 :  
0

|              | f1-score | precision | recall   | support |
|--------------|----------|-----------|----------|---------|
| AFIB         | 0.676914 | 0.723133  | 0.636537 | 204.0   |
| GSVT         | 0.715565 | 0.700984  | 0.730829 | 300.0   |
| SB           | 0.733314 | 0.726885  | 0.739885 | 892.0   |
| SR           | 0.715225 | 0.717607  | 0.712923 | 681.0   |
| macro avg    | 0.710254 | 0.717152  | 0.705043 | 2077.0  |
| micro avg    | 0.719586 | 0.719586  | 0.719586 | 2077.0  |
| weighted avg | 0.719280 | 0.719733  | 0.719586 | 2077.0  |

The result of Model Number:Dataset Number:Featuregroup Number:Rescale of 25 : 1 : 2 :  
1

|              | f1-score | precision | recall   | support |
|--------------|----------|-----------|----------|---------|
| AFIB         | 0.757333 | 0.750233  | 0.764665 | 875.0   |
| GSVT         | 0.718024 | 0.700766  | 0.770807 | 691.0   |
| SB           | 0.830261 | 0.827212  | 0.833355 | 1553.0  |
| SR           | 0.645761 | 0.650290  | 0.641304 | 907.0   |
| macro avg    | 0.737845 | 0.732125  | 0.752533 | 4026.0  |
| micro avg    | 0.764424 | 0.764424  | 0.764424 | 4026.0  |
| weighted avg | 0.753582 | 0.748921  | 0.764424 | 4026.0  |

The result of Model Number:Dataset Number:Featuregroup Number:Rescale of 25 : 1 : 3 :  
0

|              | f1-score | precision | recall   | support |
|--------------|----------|-----------|----------|---------|
| AFIB         | 0.739485 | 0.763504  | 0.717077 | 204.0   |
| GSVT         | 0.759902 | 0.750212  | 0.769997 | 300.0   |
| SB           | 0.781340 | 0.778394  | 0.784317 | 892.0   |
| SR           | 0.770412 | 0.771807  | 0.769052 | 681.0   |
| macro avg    | 0.762785 | 0.765979  | 0.760111 | 2077.0  |
| micro avg    | 0.770640 | 0.770640  | 0.770640 | 2077.0  |
| weighted avg | 0.770550 | 0.770701  | 0.770640 | 2077.0  |

The result of Model Number:Dataset Number:Featuregroup Number:Rescale of 25 : 1 : 3 :  
1

|      | f1-score | precision | recall   | support |
|------|----------|-----------|----------|---------|
| AFIB | 0.750843 | 0.774910  | 0.728450 | 204.0   |

GSVT 0.773306 0.760002 0.787198 300.0  
SB 0.786683 0.778906 0.794619 892.0  
SR 0.765649 0.775230 0.756318 681.0  
macro avg 0.769120 0.772262 0.766646 2077.0  
micro avg 0.774490 0.774490 0.774490 2077.0  
weighted avg 0.774334 0.774578 0.774490 2077.0  
The result of Model Number:Dataset Number:Featuregroup Number:Rescale of 25 : 1 : 4 :  
0

f1-score precision recall support  
AFIB 0.828139 0.848761 0.808535 875.0  
GSVT 0.874988 0.878703 0.871341 691.0  
SB 0.949084 0.945452 0.952749 1553.0  
SR 0.902787 0.885964 0.920309 907.0  
macro avg 0.888749 0.889720 0.888234 4026.0  
micro avg 0.900125 0.900125 0.900125 4026.0  
weighted avg 0.899651 0.899579 0.900125 4026.0  
The result of Model Number:Dataset Number:Featuregroup Number:Rescale of 25 : 1 : 4 :  
1

f1-score precision recall support  
AFIB 0.863685 0.880324 0.848071 204.0  
GSVT 0.879904 0.865607 0.894841 300.0  
SB 0.894594 0.883925 0.905526 892.0  
SR 0.877952 0.894412 0.862101 681.0  
macro avg 0.879034 0.881067 0.877635 2077.0  
micro avg 0.884101 0.884101 0.884101 2077.0  
weighted avg 0.883980 0.884364 0.884101 2077.0  
The result of Model Number:Dataset Number:Featuregroup Number:Rescale of 25 : 1 : 5 :  
0

f1-score precision recall support  
AFIB 0.772792 0.809894 0.739094 204.0  
GSVT 0.806405 0.799557 0.813393 300.0  
SB 0.819078 0.813113 0.825136 892.0  
SR 0.810462 0.810838 0.810111 681.0  
macro avg 0.802184 0.808350 0.796933 2077.0  
micro avg 0.810062 0.810062 0.810062 2077.0  
weighted avg 0.809876 0.810093 0.810062 2077.0  
The result of Model Number:Dataset Number:Featuregroup Number:Rescale of 25 : 1 : 5 :  
1

f1-score precision recall support  
AFIB 0.774782 0.781753 0.768177 875.0  
GSVT 0.790564 0.774535 0.807458 691.0  
SB 0.838399 0.829072 0.848039 1553.0  
SR 0.805130 0.829063 0.782729 907.0  
macro avg 0.802219 0.803606 0.801601 4026.0

micro avg 0.809004 0.809004 0.809004 4026.0  
weighted avg 0.808867 0.809425 0.809004 4026.0  
The result of Model Number:Dataset Number:Featuregroup Number:Rescale of 25 : 1 : 6 :  
0

|              | f1-score | precision | recall   | support |
|--------------|----------|-----------|----------|---------|
| AFIB         | 0.782162 | 0.796235  | 0.768808 | 204.0   |
| GSVT         | 0.799807 | 0.788562  | 0.811511 | 300.0   |
| SB           | 0.812114 | 0.802519  | 0.821945 | 892.0   |
| SR           | 0.795781 | 0.809949  | 0.782109 | 681.0   |
| macro avg    | 0.797466 | 0.799316  | 0.796093 | 2077.0  |
| micro avg    | 0.802158 | 0.802158  | 0.802158 | 2077.0  |
| weighted avg | 0.802039 | 0.802322  | 0.802158 | 2077.0  |

The result of Model Number:Dataset Number:Featuregroup Number:Rescale of 25 : 1 : 6 :  
1

|              | f1-score | precision | recall   | support |
|--------------|----------|-----------|----------|---------|
| AFIB         | 0.665833 | 0.669229  | 0.662492 | 875.0   |
| GSVT         | 0.675022 | 0.671510  | 0.678629 | 691.0   |
| SB           | 0.707528 | 0.706896  | 0.708166 | 1553.0  |
| SR           | 0.694500 | 0.695066  | 0.693963 | 907.0   |
| macro avg    | 0.685721 | 0.685675  | 0.685813 | 4026.0  |
| micro avg    | 0.689970 | 0.689970  | 0.689970 | 4026.0  |
| weighted avg | 0.689952 | 0.689971  | 0.689970 | 4026.0  |

The result of Model Number:Dataset Number:Featuregroup Number:Rescale of 25 : 1 : 7 :  
0

|              | f1-score | precision | recall   | support |
|--------------|----------|-----------|----------|---------|
| AFIB         | 0.814958 | 0.831378  | 0.799698 | 204.0   |
| GSVT         | 0.841108 | 0.834353  | 0.848136 | 300.0   |
| SB           | 0.859317 | 0.858452  | 0.860184 | 892.0   |
| SR           | 0.851484 | 0.850995  | 0.851983 | 681.0   |
| macro avg    | 0.841717 | 0.843794  | 0.840000 | 2077.0  |
| micro avg    | 0.849814 | 0.849814  | 0.849814 | 2077.0  |
| weighted avg | 0.849762 | 0.849867  | 0.849814 | 2077.0  |

The result of Model Number:Dataset Number:Featuregroup Number:Rescale of 25 : 1 : 7 :  
1

|              | f1-score | precision | recall   | support |
|--------------|----------|-----------|----------|---------|
| AFIB         | 0.861617 | 0.885266  | 0.839263 | 204.0   |
| GSVT         | 0.881105 | 0.867568  | 0.895153 | 300.0   |
| SB           | 0.900463 | 0.891754  | 0.909347 | 892.0   |
| SR           | 0.877705 | 0.888673  | 0.867011 | 681.0   |
| macro avg    | 0.880223 | 0.883315  | 0.877694 | 2077.0  |
| micro avg    | 0.886532 | 0.886532  | 0.886532 | 2077.0  |
| weighted avg | 0.886390 | 0.886613  | 0.886532 | 2077.0  |

The result of Model Number:Dataset Number:Featuregroup Number:Rescale of 25 : 1 : 8 :  
0

f1-score precision recall support  
AFIB 0.771791 0.767174 0.776568 875.0  
GSVT 0.778111 0.782312 0.774068 691.0  
SB 0.824681 0.822271 0.827119 1553.0  
SR 0.806047 0.811837 0.800355 907.0  
macro avg 0.795158 0.795898 0.794527 4026.0  
micro avg 0.800997 0.800997 0.800997 4026.0  
weighted avg 0.800995 0.801087 0.800997 4026.0  
The result of Model Number:Dataset Number:Featuregroup Number:Rescale of 25 : 1 : 8 :  
1

f1-score precision recall support  
AFIB 0.847660 0.855478 0.840188 204.0  
GSVT 0.878650 0.878681 0.878642 300.0  
SB 0.897051 0.895458 0.898658 892.0  
SR 0.887531 0.887293 0.887790 681.0  
macro avg 0.877723 0.879228 0.876320 2077.0  
micro avg 0.886461 0.886461 0.886461 2077.0  
weighted avg 0.886421 0.886431 0.886461 2077.0  
The result of Model Number:Dataset Number:Featuregroup Number:Rescale of 25 : 1 : 9 :  
0

f1-score precision recall support  
AFIB 0.701432 0.708242 0.695187 204.0  
GSVT 0.722458 0.719043 0.726097 300.0  
SB 0.737088 0.736266 0.737914 892.0  
SR 0.730603 0.731359 0.729851 681.0  
macro avg 0.722895 0.723727 0.722262 2077.0  
micro avg 0.729367 0.729367 0.729367 2077.0  
weighted avg 0.729346 0.729417 0.729367 2077.0  
The result of Model Number:Dataset Number:Featuregroup Number:Rescale of 25 : 1 : 9 :  
1

f1-score precision recall support  
AFIB 0.849318 0.830017 0.869596 875.0  
GSVT 0.878425 0.892670 0.864699 691.0  
SB 0.937184 0.937189 0.937184 1553.0  
SR 0.913197 0.923601 0.903028 907.0  
macro avg 0.894531 0.895869 0.893627 4026.0  
micro avg 0.902359 0.902359 0.902359 4026.0  
weighted avg 0.902598 0.903194 0.902359 4026.0  
The result of Model Number:Dataset Number:Featuregroup Number:Rescale of 25 : 1 :  
10 : 0

f1-score precision recall support  
AFIB 0.716592 0.716405 0.716849 875.0  
GSVT 0.731562 0.728796 0.734428 691.0  
SB 0.778858 0.775342 0.782418 1553.0

SR 0.752609 0.761208 0.744231 907.0  
macro avg 0.744905 0.745438 0.744482 4026.0  
micro avg 0.751328 0.751328 0.751328 4026.0  
weighted avg 0.751294 0.751359 0.751328 4026.0  
The result of Model Number:Dataset Number:Featuregroup Number:Rescale of 25 : 1 :  
10 : 1

f1-score precision recall support  
AFIB 0.899791 0.905177 0.894516 204.0  
GSVT 0.923761 0.921015 0.926530 300.0  
SB 0.937907 0.936757 0.939062 892.0  
SR 0.931069 0.932168 0.929981 681.0  
macro avg 0.923132 0.923779 0.922522 2077.0  
micro avg 0.929899 0.929899 0.929899 2077.0  
weighted avg 0.929878 0.929877 0.929899 2077.0

The result of Model Number:Dataset Number:Featuregroup Number:Rescale of 26 : 0 : 0 :  
0

f1-score precision recall support  
AFIB 0.787507 0.785230 0.789869 875.0  
GSVT 0.802102 0.801450 0.802811 691.0  
SB 0.851949 0.848420 0.855514 1553.0  
SR 0.826372 0.835451 0.817534 907.0  
macro avg 0.816983 0.817638 0.816432 4026.0  
micro avg 0.823645 0.823645 0.823645 4026.0  
weighted avg 0.823626 0.823703 0.823645 4026.0

The result of Model Number:Dataset Number:Featuregroup Number:Rescale of 26 : 0 : 0 :  
1

f1-score precision recall support  
AFIB 0.857149 0.868599 0.846239 204.0  
GSVT 0.872291 0.866978 0.877804 300.0  
SB 0.893318 0.892526 0.894118 892.0  
SR 0.886717 0.886852 0.886589 681.0  
macro avg 0.877369 0.878739 0.876188 2077.0  
micro avg 0.884590 0.884590 0.884590 2077.0  
weighted avg 0.884564 0.884625 0.884590 2077.0

The result of Model Number:Dataset Number:Featuregroup Number:Rescale of 26 : 0 : 1 :  
0

f1-score precision recall support  
AFIB 0.759611 0.758702 0.760650 875.0  
GSVT 0.774418 0.777082 0.771852 691.0  
SB 0.820224 0.815171 0.825346 1553.0  
SR 0.803532 0.811380 0.795924 907.0  
macro avg 0.789446 0.790584 0.788443 4026.0  
micro avg 0.795475 0.795475 0.795475 4026.0  
weighted avg 0.795428 0.795507 0.795475 4026.0

The result of Model Number:Dataset Number:Featuregroup Number:Rescale of 26 : 0 : 1 : 1

|              | f1-score | precision | recall   | support |
|--------------|----------|-----------|----------|---------|
| AFIB         | 0.758577 | 0.760905  | 0.756383 | 204.0   |
| GSVT         | 0.778504 | 0.776526  | 0.780563 | 300.0   |
| SB           | 0.795896 | 0.794923  | 0.796875 | 892.0   |
| SR           | 0.789381 | 0.790899  | 0.787876 | 681.0   |
| macro avg    | 0.780590 | 0.780813  | 0.780424 | 2077.0  |
| micro avg    | 0.787591 | 0.787591  | 0.787591 | 2077.0  |
| weighted avg | 0.787582 | 0.787605  | 0.787591 | 2077.0  |

The result of Model Number:Dataset Number:Featuregroup Number:Rescale of 26 : 0 : 2 : 0

|              | f1-score | precision | recall   | support |
|--------------|----------|-----------|----------|---------|
| AFIB         | 0.824268 | 0.828033  | 0.820583 | 875.0   |
| GSVT         | 0.838010 | 0.830922  | 0.845280 | 691.0   |
| SB           | 0.885793 | 0.876748  | 0.895032 | 1553.0  |
| SR           | 0.840077 | 0.857787  | 0.823129 | 907.0   |
| macro avg    | 0.847037 | 0.848373  | 0.846006 | 4026.0  |
| micro avg    | 0.854114 | 0.854114  | 0.854114 | 4026.0  |
| weighted avg | 0.853921 | 0.854024  | 0.854114 | 4026.0  |

The result of Model Number:Dataset Number:Featuregroup Number:Rescale of 26 : 0 : 2 : 1

|              | f1-score | precision | recall   | support |
|--------------|----------|-----------|----------|---------|
| AFIB         | 0.752448 | 0.743531  | 0.761644 | 875.0   |
| GSVT         | 0.763157 | 0.770535  | 0.755994 | 691.0   |
| SB           | 0.809964 | 0.806866  | 0.813093 | 1553.0  |
| SR           | 0.791081 | 0.800208  | 0.782183 | 907.0   |
| macro avg    | 0.779163 | 0.780285  | 0.778229 | 4026.0  |
| micro avg    | 0.785148 | 0.785148  | 0.785148 | 4026.0  |
| weighted avg | 0.785176 | 0.785365  | 0.785148 | 4026.0  |

The result of Model Number:Dataset Number:Featuregroup Number:Rescale of 26 : 0 : 3 : 0

|              | f1-score | precision | recall   | support |
|--------------|----------|-----------|----------|---------|
| AFIB         | 0.813517 | 0.813662  | 0.813407 | 875.0   |
| GSVT         | 0.822124 | 0.824901  | 0.819417 | 691.0   |
| SB           | 0.863598 | 0.860621  | 0.866601 | 1553.0  |
| SR           | 0.847199 | 0.850057  | 0.844392 | 907.0   |
| macro avg    | 0.836609 | 0.837310  | 0.835954 | 4026.0  |
| micro avg    | 0.841938 | 0.841938  | 0.841938 | 4026.0  |
| weighted avg | 0.841901 | 0.841904  | 0.841938 | 4026.0  |

The result of Model Number:Dataset Number:Featuregroup Number:Rescale of 26 : 0 : 3 : 1

|      | f1-score | precision | recall   | support |
|------|----------|-----------|----------|---------|
| AFIB | 0.875819 | 0.864090  | 0.887927 | 875.0   |

GSVT 0.895401 0.902390 0.888535 691.0  
SB 0.950666 0.947692 0.953664 1553.0  
SR 0.927677 0.939975 0.915712 907.0  
macro avg 0.912391 0.913537 0.911460 4026.0  
micro avg 0.919649 0.919649 0.919649 4026.0  
weighted avg 0.919734 0.920008 0.919649 4026.0  
The result of Model Number:Dataset Number:Featuregroup Number:Rescale of 26 : 0 : 4 :  
0

f1-score precision recall support  
AFIB 0.730611 0.721522 0.740013 875.0  
GSVT 0.753485 0.762920 0.744355 691.0  
SB 0.803863 0.802992 0.804742 1553.0  
SR 0.782182 0.786193 0.778215 907.0  
macro avg 0.767535 0.768407 0.766831 4026.0  
micro avg 0.774333 0.774333 0.774333 4026.0  
weighted avg 0.774411 0.774623 0.774333 4026.0  
The result of Model Number:Dataset Number:Featuregroup Number:Rescale of 26 : 0 : 4 :  
1

f1-score precision recall support  
AFIB 0.879337 0.900732 0.859151 204.0  
GSVT 0.890391 0.878133 0.903114 300.0  
SB 0.908370 0.899298 0.917632 892.0  
SR 0.892510 0.904222 0.881123 681.0  
macro avg 0.892652 0.895597 0.890255 2077.0  
micro avg 0.897821 0.897821 0.897821 2077.0  
weighted avg 0.897721 0.897997 0.897821 2077.0  
The result of Model Number:Dataset Number:Featuregroup Number:Rescale of 26 : 0 : 5 :  
0

f1-score precision recall support  
AFIB 0.840223 0.834544 0.846093 875.0  
GSVT 0.860721 0.861064 0.860490 691.0  
SB 0.914341 0.912008 0.916696 1553.0  
SR 0.889445 0.899382 0.879737 907.0  
macro avg 0.876183 0.876750 0.875754 4026.0  
micro avg 0.883378 0.883378 0.883378 4026.0  
weighted avg 0.883421 0.883584 0.883378 4026.0  
The result of Model Number:Dataset Number:Featuregroup Number:Rescale of 26 : 0 : 5 :  
1

f1-score precision recall support  
AFIB 0.742994 0.733248 0.753036 875.0  
GSVT 0.754369 0.762754 0.746179 691.0  
SB 0.800105 0.798217 0.802008 1553.0  
SR 0.780073 0.787094 0.773187 907.0  
macro avg 0.769385 0.770328 0.768603 4026.0

micro avg 0.775289 0.775289 0.775289 4026.0  
weighted avg 0.775330 0.775504 0.775289 4026.0  
The result of Model Number:Dataset Number:Featuregroup Number:Rescale of 26 : 0 : 6 :  
0

|              | f1-score | precision | recall   | support |
|--------------|----------|-----------|----------|---------|
| AFIB         | 0.839240 | 0.848372  | 0.830547 | 204.0   |
| GSVT         | 0.867640 | 0.864022  | 0.871430 | 300.0   |
| SB           | 0.885420 | 0.884628  | 0.886214 | 892.0   |
| SR           | 0.877053 | 0.877060  | 0.877053 | 681.0   |
| macro avg    | 0.867338 | 0.868520  | 0.866311 | 2077.0  |
| micro avg    | 0.875607 | 0.875607  | 0.875607 | 2077.0  |
| weighted avg | 0.875573 | 0.875609  | 0.875607 | 2077.0  |

The result of Model Number:Dataset Number:Featuregroup Number:Rescale of 26 : 0 : 6 :  
1

|              | f1-score | precision | recall   | support |
|--------------|----------|-----------|----------|---------|
| AFIB         | 0.687635 | 0.693186  | 0.682230 | 204.0   |
| GSVT         | 0.703413 | 0.699964  | 0.706921 | 300.0   |
| SB           | 0.717141 | 0.716346  | 0.717945 | 892.0   |
| SR           | 0.711786 | 0.712733  | 0.710847 | 681.0   |
| macro avg    | 0.704994 | 0.705557  | 0.704486 | 2077.0  |
| micro avg    | 0.710517 | 0.710517  | 0.710517 | 2077.0  |
| weighted avg | 0.710504 | 0.710520  | 0.710517 | 2077.0  |

The result of Model Number:Dataset Number:Featuregroup Number:Rescale of 26 : 0 : 7 :  
0

|              | f1-score | precision | recall   | support |
|--------------|----------|-----------|----------|---------|
| AFIB         | 0.737354 | 0.732370  | 0.742506 | 875.0   |
| GSVT         | 0.755343 | 0.755644  | 0.755140 | 691.0   |
| SB           | 0.802398 | 0.800350  | 0.804465 | 1553.0  |
| SR           | 0.780550 | 0.789270  | 0.772030 | 907.0   |
| macro avg    | 0.768911 | 0.769409  | 0.768535 | 4026.0  |
| micro avg    | 0.775226 | 0.775226  | 0.775226 | 4026.0  |
| weighted avg | 0.775263 | 0.775406  | 0.775226 | 4026.0  |

The result of Model Number:Dataset Number:Featuregroup Number:Rescale of 26 : 0 : 7 :  
1

|              | f1-score | precision | recall   | support |
|--------------|----------|-----------|----------|---------|
| AFIB         | 0.892615 | 0.904538  | 0.881254 | 204.0   |
| GSVT         | 0.908384 | 0.902850  | 0.914125 | 300.0   |
| SB           | 0.930281 | 0.929456  | 0.931113 | 892.0   |
| SR           | 0.923407 | 0.923547  | 0.923273 | 681.0   |
| macro avg    | 0.913672 | 0.915098  | 0.912441 | 2077.0  |
| micro avg    | 0.921192 | 0.921192  | 0.921192 | 2077.0  |
| weighted avg | 0.921165 | 0.921228  | 0.921192 | 2077.0  |

The result of Model Number:Dataset Number:Featuregroup Number:Rescale of 26 : 0 : 8 :  
0



f1-score precision recall support  
AFIB 0.750858 0.761487 0.741138 204.0  
GSVT 0.766447 0.752336 0.781239 300.0  
SB 0.782783 0.774128 0.791647 892.0  
SR 0.766332 0.781940 0.751381 681.0  
macro avg 0.766605 0.767473 0.766351 2077.0  
micro avg 0.771980 0.771980 0.771980 2077.0  
weighted avg 0.771894 0.772300 0.771980 2077.0  
The result of Model Number:Dataset Number:Featuregroup Number:Rescale of 26 : 0 : 8 :  
1

f1-score precision recall support  
AFIB 0.853322 0.917469 0.798448 204.0  
GSVT 0.813787 0.839618 0.789622 300.0  
SB 0.847851 0.805896 0.894421 892.0  
SR 0.750538 0.782798 0.720909 681.0  
macro avg 0.816374 0.836445 0.800850 2077.0  
micro avg 0.812967 0.812967 0.812967 2077.0  
weighted avg 0.811562 0.814152 0.812967 2077.0  
The result of Model Number:Dataset Number:Featuregroup Number:Rescale of 26 : 0 : 9 :  
0

f1-score precision recall support  
AFIB 0.667557 0.653216 0.682577 875.0  
GSVT 0.691325 0.701351 0.681628 691.0  
SB 0.735943 0.735803 0.736086 1553.0  
SR 0.717498 0.725837 0.709352 907.0  
macro avg 0.703081 0.704052 0.702411 4026.0  
micro avg 0.709087 0.709087 0.709087 4026.0  
weighted avg 0.709267 0.709696 0.709087 4026.0  
The result of Model Number:Dataset Number:Featuregroup Number:Rescale of 26 : 0 : 9 :  
1

f1-score precision recall support  
AFIB 0.662452 0.663732 0.661227 875.0  
GSVT 0.641804 0.638985 0.644687 691.0  
SB 0.670609 0.629849 0.717028 1553.0  
SR 0.539746 0.625409 0.474851 907.0  
macro avg 0.628653 0.639494 0.624448 4026.0  
micro avg 0.637925 0.637925 0.637925 4026.0  
weighted avg 0.634411 0.637781 0.637925 4026.0  
The result of Model Number:Dataset Number:Featuregroup Number:Rescale of 26 : 0 :  
10 : 0

f1-score precision recall support  
AFIB 0.782249 0.782947 0.781633 875.0  
GSVT 0.796578 0.798668 0.794633 691.0  
SB 0.845578 0.839948 0.851293 1553.0

SR 0.829103 0.836672 0.821699 907.0  
macro avg 0.813377 0.814559 0.812314 4026.0  
micro avg 0.819761 0.819761 0.819761 4026.0  
weighted avg 0.819693 0.819737 0.819761 4026.0  
The result of Model Number:Dataset Number:Featuregroup Number:Rescale of 26 : 0 :  
10 : 1

f1-score precision recall support  
AFIB 0.867171 0.861501 0.872993 875.0  
GSVT 0.892946 0.900543 0.885594 691.0  
SB 0.950661 0.948591 0.952742 1553.0  
SR 0.927493 0.931217 0.923812 907.0  
macro avg 0.909568 0.910463 0.908785 4026.0  
micro avg 0.917367 0.917367 0.917367 4026.0  
weighted avg 0.917390 0.917502 0.917367 4026.0  
The result of Model Number:Dataset Number:Featuregroup Number:Rescale of 26 : 1 : 0 :  
0

f1-score precision recall support  
AFIB 0.754314 0.754850 0.753794 875.0  
GSVT 0.764479 0.765986 0.763043 691.0  
SB 0.812005 0.809307 0.814724 1553.0  
SR 0.792925 0.795873 0.790026 907.0  
macro avg 0.780931 0.781504 0.780397 4026.0  
micro avg 0.787047 0.787047 0.787047 4026.0  
weighted avg 0.787011 0.787009 0.787047 4026.0  
The result of Model Number:Dataset Number:Featuregroup Number:Rescale of 26 : 1 : 0 :  
1

f1-score precision recall support  
AFIB 0.778450 0.769759 0.787349 875.0  
GSVT 0.793938 0.801210 0.786809 691.0  
SB 0.846771 0.844014 0.849550 1553.0  
SR 0.824820 0.833083 0.816722 907.0  
macro avg 0.810995 0.812016 0.810108 4026.0  
micro avg 0.817867 0.817867 0.817867 4026.0  
weighted avg 0.817909 0.818066 0.817867 4026.0  
The result of Model Number:Dataset Number:Featuregroup Number:Rescale of 26 : 1 : 1 :  
0

f1-score precision recall support  
AFIB 0.724084 0.740458 0.708440 875.0  
GSVT 0.767693 0.770961 0.764499 691.0  
SB 0.833556 0.829628 0.837527 1553.0  
SR 0.789783 0.777668 0.802314 907.0  
macro avg 0.778779 0.779679 0.778195 4026.0  
micro avg 0.789004 0.789004 0.789004 4026.0  
weighted avg 0.788598 0.788473 0.789004 4026.0

The result of Model Number:Dataset Number:Featuregroup Number:Rescale of 26 : 1 : 1 :  
1

|              | f1-score | precision | recall   | support |
|--------------|----------|-----------|----------|---------|
| AFIB         | 0.674163 | 0.680229  | 0.668416 | 875.0   |
| GSVT         | 0.687896 | 0.673948  | 0.702596 | 691.0   |
| SB           | 0.729518 | 0.721403  | 0.737907 | 1553.0  |
| SR           | 0.700570 | 0.721395  | 0.681079 | 907.0   |
| macro avg    | 0.698037 | 0.699244  | 0.697499 | 4026.0  |
| micro avg    | 0.703941 | 0.703941  | 0.703941 | 4026.0  |
| weighted avg | 0.703822 | 0.704308  | 0.703941 | 4026.0  |

The result of Model Number:Dataset Number:Featuregroup Number:Rescale of 26 : 1 : 2 :  
0

|              | f1-score | precision | recall   | support |
|--------------|----------|-----------|----------|---------|
| AFIB         | 0.766491 | 0.781344  | 0.752536 | 204.0   |
| GSVT         | 0.796214 | 0.789556  | 0.803131 | 300.0   |
| SB           | 0.811070 | 0.809443  | 0.812706 | 892.0   |
| SR           | 0.803336 | 0.804169  | 0.802509 | 681.0   |
| macro avg    | 0.794278 | 0.796128  | 0.792721 | 2077.0  |
| micro avg    | 0.802070 | 0.802070  | 0.802070 | 2077.0  |
| weighted avg | 0.802010 | 0.802081  | 0.802070 | 2077.0  |

The result of Model Number:Dataset Number:Featuregroup Number:Rescale of 26 : 1 : 2 :  
1

|              | f1-score | precision | recall   | support |
|--------------|----------|-----------|----------|---------|
| AFIB         | 0.854947 | 0.878516  | 0.832782 | 204.0   |
| GSVT         | 0.877700 | 0.861452  | 0.894656 | 300.0   |
| SB           | 0.891934 | 0.883596  | 0.900434 | 892.0   |
| SR           | 0.869515 | 0.881328  | 0.858030 | 681.0   |
| macro avg    | 0.873524 | 0.876223  | 0.871475 | 2077.0  |
| micro avg    | 0.879051 | 0.879051  | 0.879051 | 2077.0  |
| weighted avg | 0.878895 | 0.879155  | 0.879051 | 2077.0  |

The result of Model Number:Dataset Number:Featuregroup Number:Rescale of 26 : 1 : 3 :  
0

|              | f1-score | precision | recall   | support |
|--------------|----------|-----------|----------|---------|
| AFIB         | 0.900314 | 0.909083  | 0.891930 | 204.0   |
| GSVT         | 0.921133 | 0.916904  | 0.925433 | 300.0   |
| SB           | 0.933862 | 0.930649  | 0.937105 | 892.0   |
| SR           | 0.925976 | 0.929568  | 0.922455 | 681.0   |
| macro avg    | 0.920321 | 0.921551  | 0.919231 | 2077.0  |
| micro avg    | 0.926178 | 0.926178  | 0.926178 | 2077.0  |
| weighted avg | 0.926143 | 0.926191  | 0.926178 | 2077.0  |

The result of Model Number:Dataset Number:Featuregroup Number:Rescale of 26 : 1 : 3 :  
1

|      | f1-score | precision | recall   | support |
|------|----------|-----------|----------|---------|
| AFIB | 0.745438 | 0.736645  | 0.754480 | 875.0   |

GSVT 0.758065 0.762862 0.753356 691.0  
SB 0.808244 0.807157 0.809337 1553.0  
SR 0.788388 0.795857 0.781084 907.0  
macro avg 0.775034 0.775630 0.774564 4026.0  
micro avg 0.781441 0.781441 0.781441 4026.0  
weighted avg 0.781508 0.781684 0.781441 4026.0  
The result of Model Number:Dataset Number:Featuregroup Number:Rescale of 26 : 1 : 4 :  
0

f1-score precision recall support  
AFIB 0.825251 0.826551 0.824063 204.0  
GSVT 0.845210 0.843891 0.846604 300.0  
SB 0.862646 0.861593 0.863707 892.0  
SR 0.856605 0.858249 0.854971 681.0  
macro avg 0.847428 0.847571 0.847336 2077.0  
micro avg 0.854479 0.854479 0.854479 2077.0  
weighted avg 0.854474 0.854498 0.854479 2077.0  
The result of Model Number:Dataset Number:Featuregroup Number:Rescale of 26 : 1 : 4 :  
1

f1-score precision recall support  
AFIB 0.667397 0.670445 0.664413 875.0  
GSVT 0.678523 0.672785 0.684410 691.0  
SB 0.717213 0.709889 0.724693 1553.0  
SR 0.680197 0.694536 0.666474 907.0  
macro avg 0.685833 0.686914 0.684998 4026.0  
micro avg 0.691562 0.691562 0.691562 4026.0  
weighted avg 0.691406 0.691489 0.691562 4026.0  
The result of Model Number:Dataset Number:Featuregroup Number:Rescale of 26 : 1 : 5 :  
0

f1-score precision recall support  
AFIB 0.734755 0.752208 0.718160 204.0  
GSVT 0.758889 0.751774 0.766220 300.0  
SB 0.775187 0.774320 0.776056 892.0  
SR 0.767705 0.766934 0.768490 681.0  
macro avg 0.759134 0.761309 0.757232 2077.0  
micro avg 0.766468 0.766468 0.766468 2077.0  
weighted avg 0.766409 0.766470 0.766468 2077.0  
The result of Model Number:Dataset Number:Featuregroup Number:Rescale of 26 : 1 : 5 :  
1

f1-score precision recall support  
AFIB 0.757101 0.772289 0.742649 204.0  
GSVT 0.774647 0.766595 0.782911 300.0  
SB 0.788974 0.785905 0.792069 892.0  
SR 0.780683 0.783941 0.777471 681.0  
macro avg 0.775351 0.777182 0.773775 2077.0

micro avg 0.781106 0.781106 0.781106 2077.0  
weighted avg 0.781056 0.781134 0.781106 2077.0  
The result of Model Number:Dataset Number:Featuregroup Number:Rescale of 26 : 1 : 6 :  
0

|              | f1-score | precision | recall   | support |
|--------------|----------|-----------|----------|---------|
| AFIB         | 0.689263 | 0.693046  | 0.685565 | 875.0   |
| GSVT         | 0.690227 | 0.681500  | 0.699288 | 691.0   |
| SB           | 0.725893 | 0.722980  | 0.728835 | 1553.0  |
| SR           | 0.710310 | 0.718933  | 0.701936 | 907.0   |
| macro avg    | 0.703923 | 0.704115  | 0.703906 | 4026.0  |
| micro avg    | 0.708300 | 0.708300  | 0.708300 | 4026.0  |
| weighted avg | 0.708300 | 0.708443  | 0.708300 | 4026.0  |

The result of Model Number:Dataset Number:Featuregroup Number:Rescale of 26 : 1 : 6 :  
1

|              | f1-score | precision | recall   | support |
|--------------|----------|-----------|----------|---------|
| AFIB         | 0.841590 | 0.860077  | 0.824197 | 204.0   |
| GSVT         | 0.868713 | 0.861691  | 0.875968 | 300.0   |
| SB           | 0.886919 | 0.885828  | 0.888013 | 892.0   |
| SR           | 0.879432 | 0.878667  | 0.880204 | 681.0   |
| macro avg    | 0.869164 | 0.871566  | 0.867096 | 2077.0  |
| micro avg    | 0.877445 | 0.877445  | 0.877445 | 2077.0  |
| weighted avg | 0.877382 | 0.877465  | 0.877445 | 2077.0  |

The result of Model Number:Dataset Number:Featuregroup Number:Rescale of 26 : 1 : 7 :  
0

|              | f1-score | precision | recall   | support |
|--------------|----------|-----------|----------|---------|
| AFIB         | 0.681100 | 0.687382  | 0.675096 | 204.0   |
| GSVT         | 0.706000 | 0.706025  | 0.705994 | 300.0   |
| SB           | 0.720786 | 0.719506  | 0.722077 | 892.0   |
| SR           | 0.713136 | 0.712945  | 0.713344 | 681.0   |
| macro avg    | 0.705255 | 0.706464  | 0.704128 | 2077.0  |
| micro avg    | 0.712276 | 0.712276  | 0.712276 | 2077.0  |
| weighted avg | 0.712244 | 0.712252  | 0.712276 | 2077.0  |

The result of Model Number:Dataset Number:Featuregroup Number:Rescale of 26 : 1 : 7 :  
1

|              | f1-score | precision | recall   | support |
|--------------|----------|-----------|----------|---------|
| AFIB         | 0.843942 | 0.850013  | 0.837959 | 875.0   |
| GSVT         | 0.842597 | 0.837552  | 0.847717 | 691.0   |
| SB           | 0.888817 | 0.878969  | 0.898890 | 1553.0  |
| SR           | 0.852889 | 0.868105  | 0.838224 | 907.0   |
| macro avg    | 0.857061 | 0.858660  | 0.855698 | 4026.0  |
| micro avg    | 0.863197 | 0.863197  | 0.863197 | 4026.0  |
| weighted avg | 0.863037 | 0.863120  | 0.863197 | 4026.0  |

The result of Model Number:Dataset Number:Featuregroup Number:Rescale of 26 : 1 : 8 :  
0

f1-score precision recall support  
AFIB 0.855976 0.862088 0.850104 204.0  
GSVT 0.885907 0.885336 0.886496 300.0  
SB 0.903632 0.901627 0.905655 892.0  
SR 0.895555 0.896638 0.894501 681.0  
macro avg 0.885267 0.886422 0.884189 2077.0  
micro avg 0.893774 0.893774 0.893774 2077.0  
weighted avg 0.893743 0.893755 0.893774 2077.0  
The result of Model Number:Dataset Number:Featuregroup Number:Rescale of 26 : 1 : 8 :  
1

f1-score precision recall support  
AFIB 0.713958 0.718231 0.709772 204.0  
GSVT 0.732977 0.730798 0.735174 300.0  
SB 0.744201 0.743289 0.745118 892.0  
SR 0.738776 0.739648 0.737912 681.0  
macro avg 0.732478 0.732991 0.731994 2077.0  
micro avg 0.737847 0.737847 0.737847 2077.0  
weighted avg 0.737831 0.737830 0.737847 2077.0  
The result of Model Number:Dataset Number:Featuregroup Number:Rescale of 26 : 1 : 9 :  
0

f1-score precision recall support  
AFIB 0.661025 0.660700 0.661402 875.0  
GSVT 0.675375 0.672052 0.678773 691.0  
SB 0.706454 0.701836 0.711139 1553.0  
SR 0.686343 0.697523 0.675535 907.0  
macro avg 0.682299 0.683028 0.681712 4026.0  
micro avg 0.686753 0.686753 0.686753 4026.0  
weighted avg 0.686716 0.686812 0.686753 4026.0  
The result of Model Number:Dataset Number:Featuregroup Number:Rescale of 26 : 1 : 9 :  
1

f1-score precision recall support  
AFIB 0.705332 0.707123 0.703577 875.0  
GSVT 0.717779 0.710004 0.725756 691.0  
SB 0.756500 0.747942 0.765267 1553.0  
SR 0.721911 0.741675 0.703202 907.0  
macro avg 0.725381 0.726686 0.724451 4026.0  
micro avg 0.731096 0.731096 0.731096 4026.0  
weighted avg 0.730941 0.731147 0.731096 4026.0  
The result of Model Number:Dataset Number:Featuregroup Number:Rescale of 26 : 1 :  
10 : 0

f1-score precision recall support  
AFIB 0.730012 0.743646 0.808235 204.0  
GSVT 0.876668 0.858909 0.895621 300.0  
SB 0.721189 0.714451 0.728063 892.0

SR 0.877787 0.885120 0.870696 681.0  
macro avg 0.801414 0.800531 0.825654 2077.0  
micro avg 0.806906 0.806906 0.806906 2077.0  
weighted avg 0.795858 0.794142 0.806906 2077.0  
The result of Model Number:Dataset Number:Featuregroup Number:Rescale of 26 : 1 :  
10 : 1

f1-score precision recall support  
AFIB 0.907531 0.920918 0.894626 204.0  
GSVT 0.929810 0.926160 0.933518 300.0  
SB 0.950460 0.948554 0.952377 892.0  
SR 0.943718 0.943861 0.943585 681.0  
macro avg 0.932880 0.934873 0.931027 2077.0  
micro avg 0.941098 0.941098 0.941098 2077.0  
weighted avg 0.941051 0.941066 0.941098 2077.0

The result of Model Number:Dataset Number:Featuregroup Number:Rescale of 27 : 0 : 0 :  
0

f1-score precision recall support  
AFIB 0.754799 0.771884 0.738551 204.0  
GSVT 0.774885 0.771091 0.778751 300.0  
SB 0.790738 0.788454 0.793040 892.0  
SR 0.785657 0.785318 0.786009 681.0  
macro avg 0.776520 0.779187 0.774088 2077.0  
micro avg 0.783319 0.783319 0.783319 2077.0  
weighted avg 0.783252 0.783290 0.783319 2077.0

The result of Model Number:Dataset Number:Featuregroup Number:Rescale of 27 : 0 : 0 :  
1

f1-score precision recall support  
AFIB 0.806237 0.814831 0.797955 204.0  
GSVT 0.821064 0.816560 0.825710 300.0  
SB 0.840017 0.838617 0.841427 892.0  
SR 0.833015 0.834372 0.831673 681.0  
macro avg 0.825083 0.826095 0.824191 2077.0  
micro avg 0.831689 0.831689 0.831689 2077.0  
weighted avg 0.831666 0.831703 0.831689 2077.0

The result of Model Number:Dataset Number:Featuregroup Number:Rescale of 27 : 0 : 1 :  
0

f1-score precision recall support  
AFIB 0.910176 0.922229 0.898571 204.0  
GSVT 0.937642 0.934258 0.941072 300.0  
SB 0.949321 0.946367 0.952298 892.0  
SR 0.938977 0.940786 0.937202 681.0  
macro avg 0.934029 0.935910 0.932286 2077.0  
micro avg 0.940450 0.940450 0.940450 2077.0  
weighted avg 0.940398 0.940417 0.940450 2077.0

The result of Model Number:Dataset Number:Featuregroup Number:Rescale of 27 : 0 : 1 :  
1

|              | f1-score | precision | recall   | support |
|--------------|----------|-----------|----------|---------|
| AFIB         | 0.752136 | 0.758209  | 0.746225 | 204.0   |
| GSVT         | 0.769395 | 0.765622  | 0.773231 | 300.0   |
| SB           | 0.784411 | 0.783541  | 0.785290 | 892.0   |
| SR           | 0.778554 | 0.779589  | 0.777526 | 681.0   |
| macro avg    | 0.771124 | 0.771740  | 0.770568 | 2077.0  |
| micro avg    | 0.777166 | 0.777166  | 0.777166 | 2077.0  |
| weighted avg | 0.777152 | 0.777169  | 0.777166 | 2077.0  |

The result of Model Number:Dataset Number:Featuregroup Number:Rescale of 27 : 0 : 2 :  
0

|              | f1-score | precision | recall   | support |
|--------------|----------|-----------|----------|---------|
| AFIB         | 0.820881 | 0.843983  | 0.799180 | 204.0   |
| GSVT         | 0.842104 | 0.836193  | 0.848257 | 300.0   |
| SB           | 0.865261 | 0.861799  | 0.868753 | 892.0   |
| SR           | 0.853761 | 0.854294  | 0.853253 | 681.0   |
| macro avg    | 0.845502 | 0.849067  | 0.842361 | 2077.0  |
| micro avg    | 0.853877 | 0.853877  | 0.853877 | 2077.0  |
| weighted avg | 0.853787 | 0.853890  | 0.853877 | 2077.0  |

The result of Model Number:Dataset Number:Featuregroup Number:Rescale of 27 : 0 : 2 :  
1

|              | f1-score | precision | recall   | support |
|--------------|----------|-----------|----------|---------|
| AFIB         | 0.792907 | 0.826271  | 0.762204 | 204.0   |
| GSVT         | 0.819510 | 0.806966  | 0.832574 | 300.0   |
| SB           | 0.839276 | 0.833257  | 0.845393 | 892.0   |
| SR           | 0.817494 | 0.821651  | 0.813410 | 681.0   |
| macro avg    | 0.817297 | 0.822036  | 0.813395 | 2077.0  |
| micro avg    | 0.824884 | 0.824884  | 0.824884 | 2077.0  |
| weighted avg | 0.824725 | 0.824968  | 0.824884 | 2077.0  |

The result of Model Number:Dataset Number:Featuregroup Number:Rescale of 27 : 0 : 3 :  
0

|              | f1-score | precision | recall   | support |
|--------------|----------|-----------|----------|---------|
| AFIB         | 0.765393 | 0.802499  | 0.731652 | 204.0   |
| GSVT         | 0.797270 | 0.786853  | 0.808129 | 300.0   |
| SB           | 0.818743 | 0.812517  | 0.825077 | 892.0   |
| SR           | 0.795947 | 0.798325  | 0.793618 | 681.0   |
| macro avg    | 0.794338 | 0.800048  | 0.789619 | 2077.0  |
| micro avg    | 0.803138 | 0.803138  | 0.803138 | 2077.0  |
| weighted avg | 0.802927 | 0.803173  | 0.803138 | 2077.0  |

The result of Model Number:Dataset Number:Featuregroup Number:Rescale of 27 : 0 : 3 :  
1

|      | f1-score | precision | recall   | support |
|------|----------|-----------|----------|---------|
| AFIB | 0.669453 | 0.670747  | 0.668215 | 875.0   |



GSVT 0.648588 0.645738 0.651501 691.0  
SB 0.677697 0.636506 0.724606 1553.0  
SR 0.545451 0.632019 0.479870 907.0  
macro avg 0.635297 0.646253 0.631048 4026.0  
micro avg 0.644667 0.644667 0.644667 4026.0  
weighted avg 0.641116 0.644522 0.644667 4026.0  
The result of Model Number:Dataset Number:Featuregroup Number:Rescale of 27 : 0 : 4 :  
0

f1-score precision recall support  
AFIB 0.794170 0.796852 0.791534 875.0  
GSVT 0.792073 0.786494 0.797803 691.0  
SB 0.833406 0.825671 0.841293 1553.0  
SR 0.801722 0.817172 0.786884 907.0  
macro avg 0.805343 0.806547 0.804379 4026.0  
micro avg 0.810757 0.810757 0.810757 4026.0  
weighted avg 0.810646 0.810769 0.810757 4026.0  
The result of Model Number:Dataset Number:Featuregroup Number:Rescale of 27 : 0 : 4 :  
1

f1-score precision recall support  
AFIB 0.824740 0.853372 0.798079 204.0  
GSVT 0.840554 0.831352 0.850065 300.0  
SB 0.862931 0.856735 0.869219 892.0  
SR 0.847519 0.851686 0.843407 681.0  
macro avg 0.843936 0.848286 0.840193 2077.0  
micro avg 0.851002 0.851002 0.851002 2077.0  
weighted avg 0.850895 0.851083 0.851002 2077.0  
The result of Model Number:Dataset Number:Featuregroup Number:Rescale of 27 : 0 : 5 :  
0

f1-score precision recall support  
AFIB 0.767123 0.756338 0.778258 875.0  
GSVT 0.783639 0.789519 0.777867 691.0  
SB 0.833311 0.830862 0.835778 1553.0  
SR 0.812784 0.824029 0.801856 907.0  
macro avg 0.799214 0.800187 0.798440 4026.0  
micro avg 0.805695 0.805695 0.805695 4026.0  
weighted avg 0.805776 0.806030 0.805695 4026.0  
The result of Model Number:Dataset Number:Featuregroup Number:Rescale of 27 : 0 : 5 :  
1

f1-score precision recall support  
AFIB 0.822751 0.845905 0.801000 204.0  
GSVT 0.844021 0.838097 0.850189 300.0  
SB 0.867232 0.863762 0.870731 892.0  
SR 0.855705 0.856240 0.855196 681.0  
macro avg 0.847427 0.851001 0.844279 2077.0

micro avg 0.855821 0.855821 0.855821 2077.0  
weighted avg 0.855731 0.855834 0.855821 2077.0  
The result of Model Number:Dataset Number:Featuregroup Number:Rescale of 27 : 0 : 6 :  
0

|              | f1-score | precision | recall   | support |
|--------------|----------|-----------|----------|---------|
| AFIB         | 0.680195 | 0.673642  | 0.686982 | 875.0   |
| GSVT         | 0.698016 | 0.700013  | 0.696103 | 691.0   |
| SB           | 0.742111 | 0.740404  | 0.743831 | 1553.0  |
| SR           | 0.721235 | 0.729722  | 0.712959 | 907.0   |
| macro avg    | 0.710389 | 0.710945  | 0.709969 | 4026.0  |
| micro avg    | 0.716329 | 0.716329  | 0.716329 | 4026.0  |
| weighted avg | 0.716383 | 0.716555  | 0.716329 | 4026.0  |

The result of Model Number:Dataset Number:Featuregroup Number:Rescale of 27 : 0 : 6 :  
1

|              | f1-score | precision | recall   | support |
|--------------|----------|-----------|----------|---------|
| AFIB         | 0.920299 | 0.942176  | 0.899518 | 204.0   |
| GSVT         | 0.944191 | 0.940548  | 0.947962 | 300.0   |
| SB           | 0.967588 | 0.965429  | 0.969757 | 892.0   |
| SR           | 0.955415 | 0.953493  | 0.957379 | 681.0   |
| macro avg    | 0.946873 | 0.950411  | 0.943654 | 2077.0  |
| micro avg    | 0.955652 | 0.955652  | 0.955652 | 2077.0  |
| weighted avg | 0.955573 | 0.955638  | 0.955652 | 2077.0  |

The result of Model Number:Dataset Number:Featuregroup Number:Rescale of 27 : 0 : 7 :  
0

|              | f1-score | precision | recall   | support |
|--------------|----------|-----------|----------|---------|
| AFIB         | 0.714419 | 0.718167  | 0.710753 | 875.0   |
| GSVT         | 0.729357 | 0.728047  | 0.730724 | 691.0   |
| SB           | 0.791957 | 0.785884  | 0.798127 | 1553.0  |
| SR           | 0.764016 | 0.771663  | 0.756524 | 907.0   |
| macro avg    | 0.749937 | 0.750940  | 0.749032 | 4026.0  |
| micro avg    | 0.758196 | 0.758196  | 0.758196 | 4026.0  |
| weighted avg | 0.758066 | 0.758036  | 0.758196 | 4026.0  |

The result of Model Number:Dataset Number:Featuregroup Number:Rescale of 27 : 0 : 7 :  
1

|              | f1-score | precision | recall   | support |
|--------------|----------|-----------|----------|---------|
| AFIB         | 0.826886 | 0.842730  | 0.811837 | 204.0   |
| GSVT         | 0.853181 | 0.848786  | 0.857700 | 300.0   |
| SB           | 0.874281 | 0.872919  | 0.875653 | 892.0   |
| SR           | 0.865666 | 0.864806  | 0.866555 | 681.0   |
| macro avg    | 0.855003 | 0.857310  | 0.852936 | 2077.0  |
| micro avg    | 0.863809 | 0.863809  | 0.863809 | 2077.0  |
| weighted avg | 0.863753 | 0.863808  | 0.863809 | 2077.0  |

The result of Model Number:Dataset Number:Featuregroup Number:Rescale of 27 : 0 : 8 :  
0

f1-score precision recall support  
AFIB 0.853721 0.894708 0.816495 204.0  
GSVT 0.890854 0.883290 0.898574 300.0  
SB 0.904854 0.898264 0.911547 892.0  
SR 0.895336 0.895751 0.894948 681.0  
macro avg 0.886191 0.893003 0.880391 2077.0  
micro avg 0.894895 0.894895 0.894895 2077.0  
weighted avg 0.894689 0.894928 0.894895 2077.0  
The result of Model Number:Dataset Number:Featuregroup Number:Rescale of 27 : 0 : 8 :  
1

f1-score precision recall support  
AFIB 0.741807 0.808991 0.686162 204.0  
GSVT 0.861002 0.851164 0.871336 300.0  
SB 0.913042 0.910705 0.915396 892.0  
SR 0.890687 0.878626 0.903110 681.0  
macro avg 0.851635 0.862371 0.844001 2077.0  
micro avg 0.882489 0.882489 0.882489 2077.0  
weighted avg 0.881377 0.881597 0.882489 2077.0  
The result of Model Number:Dataset Number:Featuregroup Number:Rescale of 27 : 0 : 9 :  
0

f1-score precision recall support  
AFIB 0.660377 0.662313 0.658503 875.0  
GSVT 0.671304 0.662682 0.680240 691.0  
SB 0.710464 0.708737 0.712202 1553.0  
SR 0.692474 0.700692 0.684454 907.0  
macro avg 0.683655 0.683606 0.683850 4026.0  
micro avg 0.688794 0.688794 0.688794 4026.0  
weighted avg 0.688804 0.688930 0.688794 4026.0  
The result of Model Number:Dataset Number:Featuregroup Number:Rescale of 27 : 0 : 9 :  
1

f1-score precision recall support  
AFIB 0.661883 0.663823 0.660005 875.0  
GSVT 0.672835 0.664193 0.681792 691.0  
SB 0.712084 0.710353 0.713826 1553.0  
SR 0.694053 0.702290 0.686014 907.0  
macro avg 0.685214 0.685165 0.685409 4026.0  
micro avg 0.690365 0.690365 0.690365 4026.0  
weighted avg 0.690375 0.690501 0.690365 4026.0  
The result of Model Number:Dataset Number:Featuregroup Number:Rescale of 27 : 0 :  
10 : 0

f1-score precision recall support  
AFIB 0.667105 0.679957 0.655045 204.0  
GSVT 0.679632 0.668590 0.691170 300.0  
SB 0.690979 0.682738 0.699423 892.0

SR 0.678125 0.690839 0.665882 681.0  
macro avg 0.678960 0.680531 0.677880 2077.0  
micro avg 0.682875 0.682875 0.682875 2077.0  
weighted avg 0.682781 0.683077 0.682875 2077.0  
The result of Model Number:Dataset Number:Featuregroup Number:Rescale of 27 : 0 :  
10 : 1

f1-score precision recall support  
AFIB 0.750213 0.735268 0.765817 875.0  
GSVT 0.610607 0.567832 0.765379 691.0  
SB 0.495440 0.496294 0.494590 1553.0  
SR 0.803172 0.810245 0.796256 907.0  
macro avg 0.664858 0.652410 0.705510 4026.0  
micro avg 0.667975 0.667975 0.667975 4026.0  
weighted avg 0.639906 0.631239 0.667975 4026.0

The result of Model Number:Dataset Number:Featuregroup Number:Rescale of 27 : 1 : 0 :  
0

f1-score precision recall support  
AFIB 0.918563 0.935415 0.902379 204.0  
GSVT 0.930678 0.921286 0.940283 300.0  
SB 0.953603 0.948639 0.958625 892.0  
SR 0.940621 0.946515 0.934820 681.0  
macro avg 0.935866 0.937964 0.934027 2077.0  
micro avg 0.942646 0.942646 0.942646 2077.0  
weighted avg 0.942594 0.942693 0.942646 2077.0

The result of Model Number:Dataset Number:Featuregroup Number:Rescale of 27 : 1 : 0 :  
1

f1-score precision recall support  
AFIB 0.874708 0.895646 0.856006 204.0  
GSVT 0.900466 0.887778 0.913897 300.0  
SB 0.923862 0.914476 0.933485 892.0  
SR 0.901781 0.914802 0.889197 681.0  
macro avg 0.900204 0.903175 0.898146 2077.0  
micro avg 0.908525 0.908525 0.908525 2077.0  
weighted avg 0.908415 0.908877 0.908525 2077.0

The result of Model Number:Dataset Number:Featuregroup Number:Rescale of 27 : 1 : 1 :  
0

f1-score precision recall support  
AFIB 0.897348 0.905529 0.889432 204.0  
GSVT 0.920766 0.917751 0.923829 300.0  
SB 0.937598 0.936973 0.938228 892.0  
SR 0.929352 0.929085 0.929633 681.0  
macro avg 0.921266 0.922335 0.920280 2077.0  
micro avg 0.928537 0.928537 0.928537 2077.0  
weighted avg 0.928510 0.928522 0.928537 2077.0

The result of Model Number:Dataset Number:Featuregroup Number:Rescale of 27 : 1 : 1 : 1

|              | f1-score | precision | recall   | support |
|--------------|----------|-----------|----------|---------|
| AFIB         | 0.809179 | 0.807877  | 0.810816 | 875.0   |
| GSVT         | 0.828046 | 0.823729  | 0.832455 | 691.0   |
| SB           | 0.865765 | 0.858430  | 0.873233 | 1553.0  |
| SR           | 0.832715 | 0.851228  | 0.815271 | 907.0   |
| macro avg    | 0.833926 | 0.835316  | 0.832944 | 4026.0  |
| micro avg    | 0.839611 | 0.839611  | 0.839611 | 4026.0  |
| weighted avg | 0.839547 | 0.839865  | 0.839611 | 4026.0  |

The result of Model Number:Dataset Number:Featuregroup Number:Rescale of 27 : 1 : 2 : 0

|              | f1-score | precision | recall   | support |
|--------------|----------|-----------|----------|---------|
| AFIB         | 0.835730 | 0.863484  | 0.810022 | 204.0   |
| GSVT         | 0.867447 | 0.860487  | 0.874649 | 300.0   |
| SB           | 0.886612 | 0.882969  | 0.890288 | 892.0   |
| SR           | 0.878331 | 0.878202  | 0.878461 | 681.0   |
| macro avg    | 0.867030 | 0.871285  | 0.863355 | 2077.0  |
| micro avg    | 0.876268 | 0.876268  | 0.876268 | 2077.0  |
| weighted avg | 0.876131 | 0.876245  | 0.876268 | 2077.0  |

The result of Model Number:Dataset Number:Featuregroup Number:Rescale of 27 : 1 : 2 : 1

|              | f1-score | precision | recall   | support |
|--------------|----------|-----------|----------|---------|
| AFIB         | 0.694771 | 0.712664  | 0.677783 | 204.0   |
| GSVT         | 0.637574 | 0.609193  | 0.719502 | 300.0   |
| SB           | 0.731481 | 0.729770  | 0.733203 | 892.0   |
| SR           | 0.580298 | 0.580407  | 0.580196 | 681.0   |
| macro avg    | 0.661031 | 0.658008  | 0.677671 | 2077.0  |
| micro avg    | 0.675613 | 0.675613  | 0.675613 | 2077.0  |
| weighted avg | 0.664742 | 0.661701  | 0.675613 | 2077.0  |

The result of Model Number:Dataset Number:Featuregroup Number:Rescale of 27 : 1 : 3 : 0

|              | f1-score | precision | recall   | support |
|--------------|----------|-----------|----------|---------|
| AFIB         | 0.182964 | 0.184885  | 0.181082 | 175.0   |
| GSVT         | 0.183259 | 0.181312  | 0.185248 | 138.2   |
| SB           | 0.193003 | 0.192263  | 0.193749 | 310.6   |
| SR           | 0.188537 | 0.189482  | 0.187601 | 181.4   |
| macro avg    | 0.186941 | 0.186985  | 0.186920 | 805.2   |
| micro avg    | 0.188152 | 0.188152  | 0.188152 | 805.2   |
| weighted avg | 0.188143 | 0.188153  | 0.188152 | 805.2   |

The result of Model Number:Dataset Number:Featuregroup Number:Rescale of 27 : 1 : 3 : 1

|      | f1-score | precision | recall   | support |
|------|----------|-----------|----------|---------|
| AFIB | 0.698634 | 0.711205  | 0.686707 | 204.0   |

GSVT 0.714395 0.704351 0.724849 300.0  
SB 0.725388 0.716817 0.734169 892.0  
SR 0.710799 0.723454 0.698587 681.0  
macro avg 0.712304 0.713957 0.711078 2077.0  
micro avg 0.716495 0.716495 0.716495 2077.0  
weighted avg 0.716389 0.716641 0.716495 2077.0  
The result of Model Number:Dataset Number:Featuregroup Number:Rescale of 27 : 1 : 4 :  
0

f1-score precision recall support  
AFIB 0.764816 0.759999 0.861512 204.0  
GSVT 0.932323 0.927527 0.937325 300.0  
SB 0.958869 0.954307 0.963486 892.0  
SR 0.752125 0.754603 0.750116 681.0  
macro avg 0.852033 0.849109 0.878110 2077.0  
micro avg 0.879732 0.879732 0.879732 2077.0  
weighted avg 0.868188 0.865876 0.879732 2077.0  
The result of Model Number:Dataset Number:Featuregroup Number:Rescale of 27 : 1 : 4 :  
1

f1-score precision recall support  
AFIB 0.893408 0.892410 0.894435 875.0  
GSVT 0.909750 0.898371 0.921447 691.0  
SB 0.955687 0.948004 0.963503 1553.0  
SR 0.913049 0.937005 0.890302 907.0  
macro avg 0.917973 0.918948 0.917422 4026.0  
micro avg 0.924783 0.924783 0.924783 4026.0  
weighted avg 0.924661 0.924925 0.924783 4026.0  
The result of Model Number:Dataset Number:Featuregroup Number:Rescale of 27 : 1 : 5 :  
0

f1-score precision recall support  
AFIB 0.869142 0.857069 0.881643 875.0  
GSVT 0.900201 0.912210 0.888621 691.0  
SB 0.956306 0.954347 0.958277 1553.0  
SR 0.931416 0.938613 0.924330 907.0  
macro avg 0.914266 0.915560 0.913218 4026.0  
micro avg 0.922018 0.922018 0.922018 4026.0  
weighted avg 0.922125 0.922428 0.922018 4026.0  
The result of Model Number:Dataset Number:Featuregroup Number:Rescale of 27 : 1 : 5 :  
1

f1-score precision recall support  
AFIB 0.745610 0.794191 0.702960 204.0  
GSVT 0.778274 0.759144 0.798499 300.0  
SB 0.801099 0.790808 0.811689 892.0  
SR 0.780291 0.789608 0.771243 681.0  
macro avg 0.776319 0.783438 0.771098 2077.0

micro avg 0.785843 0.785843 0.785843 2077.0  
weighted avg 0.785530 0.786173 0.785843 2077.0  
The result of Model Number:Dataset Number:Featuregroup Number:Rescale of 27 : 1 : 6 :  
0

|              | f1-score | precision | recall   | support |
|--------------|----------|-----------|----------|---------|
| AFIB         | 0.801306 | 0.803766  | 0.798989 | 204.0   |
| GSVT         | 0.822356 | 0.820266  | 0.824530 | 300.0   |
| SB           | 0.840727 | 0.839700  | 0.841761 | 892.0   |
| SR           | 0.833846 | 0.835449  | 0.832255 | 681.0   |
| macro avg    | 0.824559 | 0.824795  | 0.824384 | 2077.0  |
| micro avg    | 0.831955 | 0.831955  | 0.831955 | 2077.0  |
| weighted avg | 0.831945 | 0.831969  | 0.831955 | 2077.0  |

The result of Model Number:Dataset Number:Featuregroup Number:Rescale of 27 : 1 : 6 :  
1

|              | f1-score | precision | recall   | support |
|--------------|----------|-----------|----------|---------|
| AFIB         | 0.667763 | 0.659175  | 0.676625 | 875.0   |
| GSVT         | 0.681356 | 0.686997  | 0.675835 | 691.0   |
| SB           | 0.728506 | 0.725264  | 0.731786 | 1553.0  |
| SR           | 0.707775 | 0.718243  | 0.697624 | 907.0   |
| macro avg    | 0.696350 | 0.697419  | 0.695468 | 4026.0  |
| micro avg    | 0.702498 | 0.702498  | 0.702498 | 4026.0  |
| weighted avg | 0.702541 | 0.702750  | 0.702498 | 4026.0  |

The result of Model Number:Dataset Number:Featuregroup Number:Rescale of 27 : 1 : 7 :  
0

|              | f1-score | precision | recall   | support |
|--------------|----------|-----------|----------|---------|
| AFIB         | 0.707978 | 0.702641  | 0.803545 | 204.0   |
| GSVT         | 0.858284 | 0.853202  | 0.863435 | 300.0   |
| SB           | 0.701956 | 0.700492  | 0.703431 | 892.0   |
| SR           | 0.868156 | 0.866766  | 0.869560 | 681.0   |
| macro avg    | 0.784094 | 0.780775  | 0.809993 | 2077.0  |
| micro avg    | 0.790845 | 0.790845  | 0.790845 | 2077.0  |
| weighted avg | 0.779621 | 0.777278  | 0.790845 | 2077.0  |

The result of Model Number:Dataset Number:Featuregroup Number:Rescale of 27 : 1 : 7 :  
1

|              | f1-score | precision | recall   | support |
|--------------|----------|-----------|----------|---------|
| AFIB         | 0.867319 | 0.877461  | 0.857570 | 204.0   |
| GSVT         | 0.782326 | 0.752458  | 0.892622 | 300.0   |
| SB           | 0.725838 | 0.724128  | 0.727564 | 892.0   |
| SR           | 0.901246 | 0.902979  | 0.899527 | 681.0   |
| macro avg    | 0.819182 | 0.814256  | 0.844321 | 2077.0  |
| micro avg    | 0.820557 | 0.820557  | 0.820557 | 2077.0  |
| weighted avg | 0.805405 | 0.801921  | 0.820557 | 2077.0  |

The result of Model Number:Dataset Number:Featuregroup Number:Rescale of 27 : 1 : 8 :  
0

f1-score precision recall support  
AFIB 0.723427 0.729093 0.717887 875.0  
GSVT 0.725335 0.716078 0.734879 691.0  
SB 0.760794 0.757743 0.763878 1553.0  
SR 0.744721 0.752031 0.737579 907.0  
macro avg 0.738569 0.738736 0.738556 4026.0  
micro avg 0.742981 0.742981 0.742981 4026.0  
weighted avg 0.742966 0.743078 0.742981 4026.0  
The result of Model Number:Dataset Number:Featuregroup Number:Rescale of 27 : 1 : 8 :  
1

f1-score precision recall support  
AFIB 0.713528 0.723357 0.704277 875.0  
GSVT 0.729105 0.726086 0.732347 691.0  
SB 0.776611 0.766428 0.787100 1553.0  
SR 0.752228 0.763462 0.741655 907.0  
macro avg 0.742868 0.744833 0.741345 4026.0  
micro avg 0.749464 0.749464 0.749464 4026.0  
weighted avg 0.749254 0.749475 0.749464 4026.0  
The result of Model Number:Dataset Number:Featuregroup Number:Rescale of 27 : 1 : 9 :  
0

f1-score precision recall support  
AFIB 0.753139 0.755010 0.751328 875.0  
GSVT 0.766109 0.768411 0.763918 691.0  
SB 0.812704 0.807187 0.818301 1553.0  
SR 0.797239 0.803157 0.791437 907.0  
macro avg 0.782297 0.783441 0.781246 4026.0  
micro avg 0.788359 0.788359 0.788359 4026.0  
weighted avg 0.788277 0.788284 0.788359 4026.0  
The result of Model Number:Dataset Number:Featuregroup Number:Rescale of 27 : 1 : 9 :  
1

f1-score precision recall support  
AFIB 0.857700 0.900554 0.819171 204.0  
GSVT 0.883558 0.867184 0.900870 300.0  
SB 0.903778 0.894668 0.913095 892.0  
SR 0.878713 0.886562 0.871082 681.0  
macro avg 0.880937 0.887242 0.876054 2077.0  
micro avg 0.888329 0.888329 0.888329 2077.0  
weighted avg 0.888114 0.888619 0.888329 2077.0  
The result of Model Number:Dataset Number:Featuregroup Number:Rescale of 27 : 1 :  
10 : 0

f1-score precision recall support  
AFIB 0.809448 0.817278 0.801913 204.0  
GSVT 0.838090 0.836438 0.839763 300.0  
SB 0.855608 0.854092 0.857140 892.0



SR 0.847720 0.848130 0.847346 681.0  
macro avg 0.837717 0.838985 0.836541 2077.0  
micro avg 0.845995 0.845995 0.845995 2077.0  
weighted avg 0.845958 0.845972 0.845995 2077.0  
The result of Model Number:Dataset Number:Featuregroup Number:Rescale of 27 : 1 :  
10 : 1

f1-score precision recall support  
AFIB 0.824625 0.824213 0.825073 875.0  
GSVT 0.834882 0.840468 0.829437 691.0  
SB 0.885090 0.883056 0.887138 1553.0  
SR 0.859454 0.859250 0.859807 907.0  
macro avg 0.851013 0.851747 0.850364 4026.0  
micro avg 0.857588 0.857588 0.857588 4026.0  
weighted avg 0.857556 0.857595 0.857588 4026.0

The result of Model Number:Dataset Number:Featuregroup Number:Rescale of 28 : 0 : 0 :  
0

f1-score precision recall support  
AFIB 0.725200 0.754470 0.698173 204.0  
GSVT 0.752187 0.739968 0.764946 300.0  
SB 0.771646 0.765442 0.777961 892.0  
SR 0.750886 0.756293 0.745595 681.0  
macro avg 0.749980 0.754043 0.746669 2077.0  
micro avg 0.757632 0.757632 0.757632 2077.0  
weighted avg 0.757467 0.757685 0.757632 2077.0

The result of Model Number:Dataset Number:Featuregroup Number:Rescale of 28 : 0 : 0 :  
1

f1-score precision recall support  
AFIB 0.687046 0.709861 0.665911 204.0  
GSVT 0.713119 0.707398 0.719041 300.0  
SB 0.728875 0.725880 0.731897 892.0  
SR 0.722067 0.721962 0.722174 681.0  
macro avg 0.712777 0.716275 0.709756 2077.0  
micro avg 0.720371 0.720371 0.720371 2077.0  
weighted avg 0.720259 0.720352 0.720371 2077.0

The result of Model Number:Dataset Number:Featuregroup Number:Rescale of 28 : 0 : 1 :  
0

f1-score precision recall support  
AFIB 0.817720 0.831918 0.804103 204.0  
GSVT 0.833834 0.831366 0.836334 300.0  
SB 0.843667 0.840665 0.846693 892.0  
SR 0.836807 0.837681 0.835954 681.0  
macro avg 0.833007 0.835408 0.830771 2077.0  
micro avg 0.837492 0.837492 0.837492 2077.0  
weighted avg 0.837449 0.837484 0.837492 2077.0

The result of Model Number:Dataset Number:Featuregroup Number:Rescale of 28 : 0 : 1 : 1

|              | f1-score | precision | recall   | support |
|--------------|----------|-----------|----------|---------|
| AFIB         | 0.774056 | 0.807231  | 0.743794 | 204.0   |
| GSVT         | 0.800067 | 0.787979  | 0.812583 | 300.0   |
| SB           | 0.815936 | 0.807866  | 0.824170 | 892.0   |
| SR           | 0.793830 | 0.800621  | 0.787183 | 681.0   |
| macro avg    | 0.795972 | 0.800924  | 0.791932 | 2077.0  |
| micro avg    | 0.802475 | 0.802475  | 0.802475 | 2077.0  |
| weighted avg | 0.802282 | 0.802556  | 0.802475 | 2077.0  |

The result of Model Number:Dataset Number:Featuregroup Number:Rescale of 28 : 0 : 2 : 0

|              | f1-score | precision | recall   | support |
|--------------|----------|-----------|----------|---------|
| AFIB         | 0.871649 | 0.863674  | 0.879810 | 875.0   |
| GSVT         | 0.882817 | 0.890607  | 0.875295 | 691.0   |
| SB           | 0.938407 | 0.933459  | 0.943420 | 1553.0  |
| SR           | 0.917193 | 0.928246  | 0.906484 | 907.0   |
| macro avg    | 0.902516 | 0.903997  | 0.901252 | 4026.0  |
| micro avg    | 0.909582 | 0.909582  | 0.909582 | 4026.0  |
| weighted avg | 0.909578 | 0.909763  | 0.909582 | 4026.0  |

The result of Model Number:Dataset Number:Featuregroup Number:Rescale of 28 : 0 : 2 : 1

|              | f1-score | precision | recall   | support |
|--------------|----------|-----------|----------|---------|
| AFIB         | 0.757155 | 0.762256  | 0.752233 | 875.0   |
| GSVT         | 0.770667 | 0.759963  | 0.781819 | 691.0   |
| SB           | 0.821230 | 0.815606  | 0.826938 | 1553.0  |
| SR           | 0.787950 | 0.801561  | 0.774837 | 907.0   |
| macro avg    | 0.784250 | 0.784846  | 0.783957 | 4026.0  |
| micro avg    | 0.791220 | 0.791220  | 0.791220 | 4026.0  |
| weighted avg | 0.791128 | 0.791297  | 0.791220 | 4026.0  |

The result of Model Number:Dataset Number:Featuregroup Number:Rescale of 28 : 0 : 3 : 0

|              | f1-score | precision | recall   | support |
|--------------|----------|-----------|----------|---------|
| AFIB         | 0.696867 | 0.690334  | 0.703614 | 875.0   |
| GSVT         | 0.660697 | 0.644817  | 0.709266 | 691.0   |
| SB           | 0.763973 | 0.761167  | 0.766820 | 1553.0  |
| SR           | 0.594204 | 0.598371  | 0.590103 | 907.0   |
| macro avg    | 0.678935 | 0.673672  | 0.692451 | 4026.0  |
| micro avg    | 0.703393 | 0.703393  | 0.703393 | 4026.0  |
| weighted avg | 0.693416 | 0.689127  | 0.703393 | 4026.0  |

The result of Model Number:Dataset Number:Featuregroup Number:Rescale of 28 : 0 : 3 : 1

|      | f1-score | precision | recall   | support |
|------|----------|-----------|----------|---------|
| AFIB | 0.737593 | 0.756903  | 0.719581 | 204.0   |

GSVT 0.694025 0.714195 0.675340 300.0  
SB 0.732344 0.706560 0.760095 892.0  
SR 0.663781 0.685398 0.643619 681.0  
macro avg 0.706936 0.715764 0.699659 2077.0  
micro avg 0.705684 0.705684 0.705684 2077.0  
weighted avg 0.704845 0.705669 0.705684 2077.0  
The result of Model Number:Dataset Number:Featuregroup Number:Rescale of 28 : 0 : 4 :  
0

f1-score precision recall support  
AFIB 0.859071 0.885530 0.834319 204.0  
GSVT 0.880987 0.870202 0.892139 300.0  
SB 0.904916 0.899539 0.910388 892.0  
SR 0.889663 0.894051 0.885353 681.0  
macro avg 0.883659 0.887331 0.880550 2077.0  
micro avg 0.892072 0.892072 0.892072 2077.0  
weighted avg 0.891956 0.892127 0.892072 2077.0  
The result of Model Number:Dataset Number:Featuregroup Number:Rescale of 28 : 0 : 4 :  
1

f1-score precision recall support  
AFIB 0.775322 0.764583 0.786399 875.0  
GSVT 0.792518 0.798932 0.786211 691.0  
SB 0.841249 0.838831 0.843685 1553.0  
SR 0.820784 0.831466 0.810380 907.0  
macro avg 0.807468 0.808453 0.806669 4026.0  
micro avg 0.813867 0.813867 0.813867 4026.0  
weighted avg 0.813946 0.814187 0.813867 4026.0  
The result of Model Number:Dataset Number:Featuregroup Number:Rescale of 28 : 0 : 5 :  
0

f1-score precision recall support  
AFIB 0.762105 0.778091 0.746784 204.0  
GSVT 0.779785 0.775171 0.784462 300.0  
SB 0.798795 0.796924 0.800675 892.0  
SR 0.792048 0.791820 0.792283 681.0  
macro avg 0.783183 0.785502 0.781051 2077.0  
micro avg 0.790289 0.790289 0.790289 2077.0  
weighted avg 0.790233 0.790259 0.790289 2077.0  
The result of Model Number:Dataset Number:Featuregroup Number:Rescale of 28 : 0 : 5 :  
1

f1-score precision recall support  
AFIB 0.767451 0.758497 0.778620 875.0  
GSVT 0.789661 0.780089 0.800106 691.0  
SB 0.801563 0.770622 0.846947 1553.0  
SR 0.636483 0.670056 0.606151 907.0  
macro avg 0.748789 0.744816 0.757956 4026.0

micro avg 0.769810 0.769810 0.769810 4026.0  
weighted avg 0.754916 0.746956 0.769810 4026.0  
The result of Model Number:Dataset Number:Featuregroup Number:Rescale of 28 : 0 : 6 :  
0

|              | f1-score | precision | recall   | support |
|--------------|----------|-----------|----------|---------|
| AFIB         | 0.806954 | 0.826588  | 0.788430 | 204.0   |
| GSVT         | 0.817098 | 0.805850  | 0.828774 | 300.0   |
| SB           | 0.833597 | 0.825273  | 0.842097 | 892.0   |
| SR           | 0.819043 | 0.829791  | 0.808593 | 681.0   |
| macro avg    | 0.819173 | 0.821875  | 0.816974 | 2077.0  |
| micro avg    | 0.823916 | 0.823916  | 0.823916 | 2077.0  |
| weighted avg | 0.823825 | 0.824078  | 0.823916 | 2077.0  |

The result of Model Number:Dataset Number:Featuregroup Number:Rescale of 28 : 0 : 6 :  
1

|              | f1-score | precision | recall   | support |
|--------------|----------|-----------|----------|---------|
| AFIB         | 0.622956 | 0.624160  | 0.621804 | 875.0   |
| GSVT         | 0.603539 | 0.600888  | 0.606250 | 691.0   |
| SB           | 0.630627 | 0.592297  | 0.674278 | 1553.0  |
| SR           | 0.507566 | 0.588122  | 0.446541 | 907.0   |
| macro avg    | 0.591172 | 0.601367  | 0.587218 | 4026.0  |
| micro avg    | 0.599892 | 0.599892  | 0.599892 | 4026.0  |
| weighted avg | 0.596587 | 0.599756  | 0.599892 | 4026.0  |

The result of Model Number:Dataset Number:Featuregroup Number:Rescale of 28 : 0 : 7 :  
0

|              | f1-score | precision | recall   | support |
|--------------|----------|-----------|----------|---------|
| AFIB         | 0.657390 | 0.657565  | 0.657329 | 875.0   |
| GSVT         | 0.668837 | 0.666368  | 0.671409 | 691.0   |
| SB           | 0.715525 | 0.713788  | 0.717274 | 1553.0  |
| SR           | 0.698461 | 0.703474  | 0.693538 | 907.0   |
| macro avg    | 0.685053 | 0.685299  | 0.684888 | 4026.0  |
| micro avg    | 0.691026 | 0.691026  | 0.691026 | 4026.0  |
| weighted avg | 0.691033 | 0.691106  | 0.691026 | 4026.0  |

The result of Model Number:Dataset Number:Featuregroup Number:Rescale of 28 : 0 : 7 :  
1

|              | f1-score | precision | recall   | support |
|--------------|----------|-----------|----------|---------|
| AFIB         | 0.791743 | 0.827495  | 0.759210 | 204.0   |
| GSVT         | 0.819280 | 0.810079  | 0.828842 | 300.0   |
| SB           | 0.788117 | 0.753757  | 0.843297 | 892.0   |
| SR           | 0.656610 | 0.662208  | 0.651217 | 681.0   |
| macro avg    | 0.763937 | 0.763385  | 0.770641 | 2077.0  |
| micro avg    | 0.769971 | 0.769971  | 0.769971 | 2077.0  |
| weighted avg | 0.749856 | 0.739118  | 0.769971 | 2077.0  |

The result of Model Number:Dataset Number:Featuregroup Number:Rescale of 28 : 0 : 8 :  
0

f1-score precision recall support  
AFIB 0.682242 0.739195 0.634797 204.0  
GSVT 0.731784 0.722582 0.741521 300.0  
SB 0.750465 0.739952 0.761369 892.0  
SR 0.729994 0.733414 0.726962 681.0  
macro avg 0.723621 0.733786 0.716162 2077.0  
micro avg 0.734789 0.734789 0.734789 2077.0  
weighted avg 0.734354 0.735225 0.734789 2077.0  
The result of Model Number:Dataset Number:Featuregroup Number:Rescale of 28 : 0 : 8 :  
1

f1-score precision recall support  
AFIB 0.758214 0.756987 0.759512 875.0  
GSVT 0.765161 0.768204 0.762181 691.0  
SB 0.803552 0.800631 0.806501 1553.0  
SR 0.790409 0.794407 0.786494 907.0  
macro avg 0.779334 0.780057 0.778672 4026.0  
micro avg 0.784174 0.784174 0.784174 4026.0  
weighted avg 0.784148 0.784178 0.784174 4026.0  
The result of Model Number:Dataset Number:Featuregroup Number:Rescale of 28 : 0 : 9 :  
0

f1-score precision recall support  
AFIB 0.833570 0.851088 0.816791 875.0  
GSVT 0.887655 0.890704 0.884670 691.0  
SB 0.967112 0.962554 0.971718 1553.0  
SR 0.915480 0.903288 0.928082 907.0  
macro avg 0.900954 0.901909 0.900315 4026.0  
micro avg 0.913276 0.913276 0.913276 4026.0  
weighted avg 0.912819 0.912645 0.913276 4026.0  
The result of Model Number:Dataset Number:Featuregroup Number:Rescale of 28 : 0 : 9 :  
1

f1-score precision recall support  
AFIB 0.826153 0.839888 0.813050 204.0  
GSVT 0.841995 0.836013 0.848126 300.0  
SB 0.861525 0.856683 0.866441 892.0  
SR 0.850549 0.855753 0.845435 681.0  
macro avg 0.845055 0.847084 0.843263 2077.0  
micro avg 0.851664 0.851664 0.851664 2077.0  
weighted avg 0.851631 0.851743 0.851664 2077.0  
The result of Model Number:Dataset Number:Featuregroup Number:Rescale of 28 : 0 :  
10 : 0

f1-score precision recall support  
AFIB 0.825146 0.821791 0.828550 875.0  
GSVT 0.837208 0.842269 0.832239 691.0  
SB 0.882993 0.881918 0.884073 1553.0

SR 0.864572 0.865942 0.863232 907.0  
macro avg 0.852480 0.852980 0.852024 4026.0  
micro avg 0.858414 0.858414 0.858414 4026.0  
weighted avg 0.858412 0.858446 0.858414 4026.0  
The result of Model Number:Dataset Number:Featuregroup Number:Rescale of 28 : 0 :  
10 : 1

f1-score precision recall support  
AFIB 0.729948 0.731097 0.728897 204.0  
GSVT 0.747601 0.746435 0.748835 300.0  
SB 0.763024 0.762093 0.763963 892.0  
SR 0.757680 0.759134 0.756235 681.0  
macro avg 0.749563 0.749690 0.749482 2077.0  
micro avg 0.755800 0.755800 0.755800 2077.0  
weighted avg 0.755796 0.755817 0.755800 2077.0

The result of Model Number:Dataset Number:Featuregroup Number:Rescale of 28 : 1 : 0 :  
0

f1-score precision recall support  
AFIB 0.757347 0.765588 0.749503 204.0  
GSVT 0.782977 0.779712 0.786396 300.0  
SB 0.799022 0.798307 0.799738 892.0  
SR 0.791470 0.791477 0.791470 681.0  
macro avg 0.782704 0.783771 0.781777 2077.0  
micro avg 0.790166 0.790166 0.790166 2077.0  
weighted avg 0.790135 0.790168 0.790166 2077.0

The result of Model Number:Dataset Number:Featuregroup Number:Rescale of 28 : 1 : 0 :  
1

f1-score precision recall support  
AFIB 0.688316 0.707290 0.670470 204.0  
GSVT 0.706634 0.693553 0.720285 300.0  
SB 0.718094 0.711381 0.724937 892.0  
SR 0.700044 0.709555 0.690797 681.0  
macro avg 0.703272 0.705445 0.701622 2077.0  
micro avg 0.707722 0.707722 0.707722 2077.0  
weighted avg 0.707596 0.707805 0.707722 2077.0

The result of Model Number:Dataset Number:Featuregroup Number:Rescale of 28 : 1 : 1 :  
0

f1-score precision recall support  
AFIB 0.774905 0.779543 0.770361 204.0  
GSVT 0.795547 0.793183 0.797932 300.0  
SB 0.807730 0.806740 0.808725 892.0  
SR 0.801842 0.802788 0.800904 681.0  
macro avg 0.795006 0.795563 0.794481 2077.0  
micro avg 0.800834 0.800834 0.800834 2077.0  
weighted avg 0.800816 0.800815 0.800834 2077.0

The result of Model Number:Dataset Number:Featuregroup Number:Rescale of 28 : 1 : 1 : 1

|              | f1-score | precision | recall   | support |
|--------------|----------|-----------|----------|---------|
| AFIB         | 0.870270 | 0.859957  | 0.880906 | 875.0   |
| GSVT         | 0.882657 | 0.891189  | 0.874372 | 691.0   |
| SB           | 0.936793 | 0.933209  | 0.940412 | 1553.0  |
| SR           | 0.914953 | 0.925509  | 0.904661 | 907.0   |
| macro avg    | 0.901168 | 0.902466  | 0.900088 | 4026.0  |
| micro avg    | 0.908090 | 0.908090  | 0.908090 | 4026.0  |
| weighted avg | 0.908123 | 0.908342  | 0.908090 | 4026.0  |

The result of Model Number:Dataset Number:Featuregroup Number:Rescale of 28 : 1 : 2 : 0

|              | f1-score | precision | recall   | support |
|--------------|----------|-----------|----------|---------|
| AFIB         | 0.855935 | 0.874737  | 0.838245 | 204.0   |
| GSVT         | 0.883520 | 0.876379  | 0.890899 | 300.0   |
| SB           | 0.902037 | 0.900927  | 0.903150 | 892.0   |
| SR           | 0.894422 | 0.893644  | 0.895207 | 681.0   |
| macro avg    | 0.883978 | 0.886422  | 0.881875 | 2077.0  |
| micro avg    | 0.892401 | 0.892401  | 0.892401 | 2077.0  |
| weighted avg | 0.892337 | 0.892421  | 0.892401 | 2077.0  |

The result of Model Number:Dataset Number:Featuregroup Number:Rescale of 28 : 1 : 2 : 1

|              | f1-score | precision | recall   | support |
|--------------|----------|-----------|----------|---------|
| AFIB         | 0.676445 | 0.666848  | 0.686338 | 875.0   |
| GSVT         | 0.690361 | 0.697090  | 0.683767 | 691.0   |
| SB           | 0.734679 | 0.732285  | 0.737091 | 1553.0  |
| SR           | 0.717522 | 0.726693  | 0.708588 | 907.0   |
| macro avg    | 0.704752 | 0.705729  | 0.703946 | 4026.0  |
| micro avg    | 0.710487 | 0.710487  | 0.710487 | 4026.0  |
| weighted avg | 0.710551 | 0.710763  | 0.710487 | 4026.0  |

The result of Model Number:Dataset Number:Featuregroup Number:Rescale of 28 : 1 : 3 : 0

|              | f1-score | precision | recall   | support |
|--------------|----------|-----------|----------|---------|
| AFIB         | 0.718948 | 0.710311  | 0.727825 | 875.0   |
| GSVT         | 0.732776 | 0.738709  | 0.726942 | 691.0   |
| SB           | 0.781082 | 0.778093  | 0.784099 | 1553.0  |
| SR           | 0.762769 | 0.772522  | 0.753268 | 907.0   |
| macro avg    | 0.748894 | 0.749909  | 0.748034 | 4026.0  |
| micro avg    | 0.755113 | 0.755113  | 0.755113 | 4026.0  |
| weighted avg | 0.755162 | 0.755347  | 0.755113 | 4026.0  |

The result of Model Number:Dataset Number:Featuregroup Number:Rescale of 28 : 1 : 3 : 1

|      | f1-score | precision | recall   | support |
|------|----------|-----------|----------|---------|
| AFIB | 0.710406 | 0.710744  | 0.710170 | 875.0   |

GSVT 0.728804 0.722495 0.735249 691.0  
SB 0.778365 0.772693 0.784128 1553.0  
SR 0.745112 0.759924 0.730905 907.0  
macro avg 0.740672 0.741464 0.740113 4026.0  
micro avg 0.747674 0.747674 0.747674 4026.0  
weighted avg 0.747597 0.747737 0.747674 4026.0  
The result of Model Number:Dataset Number:Featuregroup Number:Rescale of 28 : 1 : 4 :  
0

f1-score precision recall support

AFIB 0.680333 0.678241 0.682482 875.0  
GSVT 0.662991 0.666242 0.659876 691.0  
SB 0.696989 0.668065 0.728537 1553.0  
SR 0.599817 0.654434 0.553661 907.0  
macro avg 0.660033 0.666746 0.656139 4026.0  
micro avg 0.667346 0.667346 0.667346 4026.0  
weighted avg 0.665642 0.666893 0.667346 4026.0  
The result of Model Number:Dataset Number:Featuregroup Number:Rescale of 28 : 1 : 4 :  
1

f1-score precision recall support

AFIB 0.752446 0.762810 0.742690 875.0  
GSVT 0.768872 0.765688 0.772291 691.0  
SB 0.818969 0.808231 0.830030 1553.0  
SR 0.793257 0.805103 0.782106 907.0  
macro avg 0.783386 0.785458 0.781779 4026.0  
micro avg 0.790341 0.790341 0.790341 4026.0  
weighted avg 0.790120 0.790353 0.790341 4026.0  
The result of Model Number:Dataset Number:Featuregroup Number:Rescale of 28 : 1 : 5 :  
0

f1-score precision recall support

AFIB 0.627406 0.643053 0.612550 875.0  
GSVT 0.667451 0.670009 0.664942 691.0  
SB 0.722793 0.719293 0.726329 1553.0  
SR 0.684886 0.673471 0.696740 907.0  
macro avg 0.675634 0.676457 0.675140 4026.0  
micro avg 0.684398 0.684398 0.684398 4026.0  
weighted avg 0.684023 0.683941 0.684398 4026.0  
The result of Model Number:Dataset Number:Featuregroup Number:Rescale of 28 : 1 : 5 :  
1

f1-score precision recall support

AFIB 0.845294 0.849728 0.840957 875.0  
GSVT 0.862969 0.861419 0.864586 691.0  
SB 0.937037 0.929851 0.944337 1553.0  
SR 0.903977 0.913025 0.895112 907.0  
macro avg 0.887319 0.888506 0.886248 4026.0



micro avg 0.897091 0.897091 0.897091 4026.0  
weighted avg 0.896937 0.896901 0.897091 4026.0  
The result of Model Number:Dataset Number:Featuregroup Number:Rescale of 28 : 1 : 6 :  
0

|              | f1-score | precision | recall   | support |
|--------------|----------|-----------|----------|---------|
| AFIB         | 0.750399 | 0.736371  | 0.765051 | 875.0   |
| GSVT         | 0.776684 | 0.788946  | 0.764895 | 691.0   |
| SB           | 0.825971 | 0.824495  | 0.827459 | 1553.0  |
| SR           | 0.804976 | 0.813504  | 0.796630 | 907.0   |
| macro avg    | 0.789508 | 0.790829  | 0.788509 | 4026.0  |
| micro avg    | 0.796212 | 0.796212  | 0.796212 | 4026.0  |
| weighted avg | 0.796357 | 0.796765  | 0.796212 | 4026.0  |

The result of Model Number:Dataset Number:Featuregroup Number:Rescale of 28 : 1 : 6 :  
1

|              | f1-score | precision | recall   | support |
|--------------|----------|-----------|----------|---------|
| AFIB         | 0.830228 | 0.822533  | 0.838115 | 875.0   |
| GSVT         | 0.845138 | 0.849728  | 0.840612 | 691.0   |
| SB           | 0.895472 | 0.893408  | 0.897547 | 1553.0  |
| SR           | 0.874608 | 0.882679  | 0.866711 | 907.0   |
| macro avg    | 0.861362 | 0.862087  | 0.860746 | 4026.0  |
| micro avg    | 0.867911 | 0.867911  | 0.867911 | 4026.0  |
| weighted avg | 0.867953 | 0.868090  | 0.867911 | 4026.0  |

The result of Model Number:Dataset Number:Featuregroup Number:Rescale of 28 : 1 : 7 :  
0

|              | f1-score | precision | recall   | support |
|--------------|----------|-----------|----------|---------|
| AFIB         | 0.867194 | 0.878920  | 0.856139 | 204.0   |
| GSVT         | 0.900133 | 0.898672  | 0.901630 | 300.0   |
| SB           | 0.919680 | 0.918455  | 0.920917 | 892.0   |
| SR           | 0.910280 | 0.909114  | 0.911481 | 681.0   |
| macro avg    | 0.899322 | 0.901290  | 0.897542 | 2077.0  |
| micro avg    | 0.908675 | 0.908675  | 0.908675 | 2077.0  |
| weighted avg | 0.908619 | 0.908652  | 0.908675 | 2077.0  |

The result of Model Number:Dataset Number:Featuregroup Number:Rescale of 28 : 1 : 7 :  
1

|              | f1-score | precision | recall   | support |
|--------------|----------|-----------|----------|---------|
| AFIB         | 0.750099 | 0.748507  | 0.751732 | 875.0   |
| GSVT         | 0.761818 | 0.758166  | 0.765569 | 691.0   |
| SB           | 0.801810 | 0.792238  | 0.811618 | 1553.0  |
| SR           | 0.764548 | 0.786209  | 0.744066 | 907.0   |
| macro avg    | 0.769569 | 0.771280  | 0.768246 | 4026.0  |
| micro avg    | 0.775480 | 0.775480  | 0.775480 | 4026.0  |
| weighted avg | 0.775313 | 0.775528  | 0.775480 | 4026.0  |

The result of Model Number:Dataset Number:Featuregroup Number:Rescale of 28 : 1 : 8 :  
0

f1-score precision recall support  
AFIB 0.581928 0.645821 0.529679 204.0  
GSVT 0.679480 0.670985 0.688326 300.0  
SB 0.722933 0.719244 0.726661 892.0  
SR 0.705998 0.696127 0.716155 681.0  
macro avg 0.672585 0.683044 0.665205 2077.0  
micro avg 0.698332 0.698332 0.698332 2077.0  
weighted avg 0.697255 0.697483 0.698332 2077.0  
The result of Model Number:Dataset Number:Featuregroup Number:Rescale of 28 : 1 : 8 :  
1

f1-score precision recall support  
AFIB 0.771627 0.764803 0.778607 875.0  
GSVT 0.701543 0.679391 0.780481 691.0  
SB 0.632479 0.607267 0.671906 1553.0  
SR 0.651862 0.658607 0.645296 907.0  
macro avg 0.689378 0.677517 0.719072 4026.0  
micro avg 0.707736 0.707736 0.707736 4026.0  
weighted avg 0.678942 0.665451 0.707736 4026.0  
The result of Model Number:Dataset Number:Featuregroup Number:Rescale of 28 : 1 : 9 :  
0

f1-score precision recall support  
AFIB 0.846161 0.867952 0.825471 204.0  
GSVT 0.776501 0.741936 0.876280 300.0  
SB 0.890870 0.888786 0.892967 892.0  
SR 0.706744 0.706877 0.706620 681.0  
macro avg 0.805069 0.801388 0.825335 2077.0  
micro avg 0.822829 0.822829 0.822829 2077.0  
weighted avg 0.809589 0.805885 0.822829 2077.0  
The result of Model Number:Dataset Number:Featuregroup Number:Rescale of 28 : 1 : 9 :  
1

f1-score precision recall support  
AFIB 0.819780 0.807528 0.832441 875.0  
GSVT 0.835498 0.842644 0.828486 691.0  
SB 0.892711 0.889637 0.895812 1553.0  
SR 0.866581 0.879506 0.854060 907.0  
macro avg 0.853643 0.854829 0.852700 4026.0  
micro avg 0.861078 0.861078 0.861078 4026.0  
weighted avg 0.861154 0.861444 0.861078 4026.0  
The result of Model Number:Dataset Number:Featuregroup Number:Rescale of 28 : 1 :  
10 : 0

f1-score precision recall support  
AFIB 0.838828 0.837110 0.841161 875.0  
GSVT 0.850270 0.841345 0.859540 691.0  
SB 0.896750 0.884641 0.909369 1553.0

SR 0.853114 0.885648 0.823080 907.0  
macro avg 0.859740 0.862186 0.858288 4026.0  
micro avg 0.866553 0.866553 0.866553 4026.0  
weighted avg 0.866353 0.867106 0.866553 4026.0  
The result of Model Number:Dataset Number:Featuregroup Number:Rescale of 28 : 1 :  
10 : 1

f1-score precision recall support  
AFIB 0.830918 0.806083 0.885975 875.0  
GSVT 0.711558 0.695976 0.728118 691.0  
SB 0.943798 0.936108 0.951865 1553.0  
SR 0.885418 0.922592 0.852785 907.0  
macro avg 0.842923 0.840190 0.854686 4026.0  
micro avg 0.876821 0.876821 0.876821 4026.0  
weighted avg 0.866252 0.863589 0.876821 4026.0  
The result of Model Number:Dataset Number:Featuregroup Number:Rescale of 29 : 0 : 0 :  
0

f1-score precision recall support  
AFIB 0.812544 0.813121 0.811983 875.0  
GSVT 0.823493 0.825117 0.821946 691.0  
SB 0.874688 0.871781 0.877617 1553.0  
SR 0.854135 0.857310 0.851012 907.0  
macro avg 0.841215 0.841832 0.840639 4026.0  
micro avg 0.847803 0.847803 0.847803 4026.0  
weighted avg 0.847765 0.847763 0.847803 4026.0  
The result of Model Number:Dataset Number:Featuregroup Number:Rescale of 29 : 0 : 0 :  
1

f1-score precision recall support  
AFIB 0.786983 0.770077 0.804690 875.0  
GSVT 0.815003 0.826823 0.803571 691.0  
SB 0.867603 0.867438 0.867772 1553.0  
SR 0.845858 0.855690 0.836255 907.0  
macro avg 0.828862 0.830007 0.828072 4026.0  
micro avg 0.835943 0.835943 0.835943 4026.0  
weighted avg 0.836155 0.836660 0.835943 4026.0  
The result of Model Number:Dataset Number:Featuregroup Number:Rescale of 29 : 0 : 1 :  
0

f1-score precision recall support  
AFIB 0.821600 0.848286 0.796704 204.0  
GSVT 0.844283 0.833518 0.855500 300.0  
SB 0.868103 0.864829 0.871410 892.0  
SR 0.855961 0.857511 0.854449 681.0  
macro avg 0.847487 0.851036 0.844516 2077.0  
micro avg 0.856214 0.856214 0.856214 2077.0  
weighted avg 0.856114 0.856282 0.856214 2077.0

The result of Model Number:Dataset Number:Featuregroup Number:Rescale of 29 : 0 : 1 :  
1

|              | f1-score | precision | recall   | support |
|--------------|----------|-----------|----------|---------|
| AFIB         | 0.858411 | 0.871284  | 0.846158 | 204.0   |
| GSVT         | 0.889410 | 0.887048  | 0.891789 | 300.0   |
| SB           | 0.910478 | 0.909265  | 0.911702 | 892.0   |
| SR           | 0.901573 | 0.900411  | 0.902768 | 681.0   |
| macro avg    | 0.889968 | 0.892002  | 0.888104 | 2077.0  |
| micro avg    | 0.899459 | 0.899459  | 0.899459 | 2077.0  |
| weighted avg | 0.899401 | 0.899422  | 0.899459 | 2077.0  |

The result of Model Number:Dataset Number:Featuregroup Number:Rescale of 29 : 0 : 2 :  
0

|              | f1-score | precision | recall   | support |
|--------------|----------|-----------|----------|---------|
| AFIB         | 0.680677 | 0.672648  | 0.688934 | 875.0   |
| GSVT         | 0.692208 | 0.696588  | 0.687907 | 691.0   |
| SB           | 0.738027 | 0.737035  | 0.739025 | 1553.0  |
| SR           | 0.719896 | 0.726716  | 0.713227 | 907.0   |
| macro avg    | 0.707702 | 0.708247  | 0.707273 | 4026.0  |
| micro avg    | 0.713553 | 0.713553  | 0.713553 | 4026.0  |
| weighted avg | 0.713614 | 0.713774  | 0.713553 | 4026.0  |

The result of Model Number:Dataset Number:Featuregroup Number:Rescale of 29 : 0 : 2 :  
1

|              | f1-score | precision | recall   | support |
|--------------|----------|-----------|----------|---------|
| AFIB         | 0.660383 | 0.646271  | 0.675163 | 875.0   |
| GSVT         | 0.683868 | 0.694326  | 0.673782 | 691.0   |
| SB           | 0.729002 | 0.729098  | 0.728909 | 1553.0  |
| SR           | 0.710221 | 0.717576  | 0.703018 | 907.0   |
| macro avg    | 0.695869 | 0.696818  | 0.695218 | 4026.0  |
| micro avg    | 0.701933 | 0.701933  | 0.701933 | 4026.0  |
| weighted avg | 0.702111 | 0.702533  | 0.701933 | 4026.0  |

The result of Model Number:Dataset Number:Featuregroup Number:Rescale of 29 : 0 : 3 :  
0

|              | f1-score | precision | recall   | support |
|--------------|----------|-----------|----------|---------|
| AFIB         | 0.790112 | 0.777462  | 0.889036 | 204.0   |
| GSVT         | 0.925012 | 0.914279  | 0.936338 | 300.0   |
| SB           | 0.955985 | 0.952375  | 0.959628 | 892.0   |
| SR           | 0.750083 | 0.753961  | 0.746372 | 681.0   |
| macro avg    | 0.855298 | 0.849519  | 0.882843 | 2077.0  |
| micro avg    | 0.879409 | 0.879409  | 0.879409 | 2077.0  |
| weighted avg | 0.867709 | 0.864637  | 0.879409 | 2077.0  |

The result of Model Number:Dataset Number:Featuregroup Number:Rescale of 29 : 0 : 3 :  
1

|      | f1-score | precision | recall   | support |
|------|----------|-----------|----------|---------|
| AFIB | 0.790640 | 0.844624  | 0.743480 | 204.0   |

GSVT 0.835785 0.818754 0.853614 300.0  
SB 0.856516 0.849007 0.864191 892.0  
SR 0.835388 0.838170 0.832699 681.0  
macro avg 0.829582 0.837639 0.823496 2077.0  
micro avg 0.840482 0.840482 0.840482 2077.0  
weighted avg 0.840124 0.840654 0.840482 2077.0  
The result of Model Number:Dataset Number:Featuregroup Number:Rescale of 29 : 0 : 4 :  
0

f1-score precision recall support

AFIB 0.816657 0.814984 0.818929 875.0  
GSVT 0.827797 0.819107 0.836822 691.0  
SB 0.873048 0.861259 0.885334 1553.0  
SR 0.830565 0.862239 0.801325 907.0  
macro avg 0.837017 0.839397 0.835602 4026.0  
micro avg 0.843649 0.843649 0.843649 4026.0  
weighted avg 0.843454 0.844188 0.843649 4026.0  
The result of Model Number:Dataset Number:Featuregroup Number:Rescale of 29 : 0 : 4 :  
1

f1-score precision recall support

AFIB 0.568653 0.620155 0.525997 204.0  
GSVT 0.660026 0.652484 0.667948 300.0  
SB 0.699918 0.698127 0.701723 892.0  
SR 0.682782 0.673536 0.692304 681.0  
macro avg 0.652845 0.661075 0.646993 2077.0  
micro avg 0.676497 0.676497 0.676497 2077.0  
weighted avg 0.675645 0.675813 0.676497 2077.0  
The result of Model Number:Dataset Number:Featuregroup Number:Rescale of 29 : 0 : 5 :  
0

f1-score precision recall support

AFIB 0.675010 0.691208 0.659861 204.0  
GSVT 0.699011 0.694960 0.703195 300.0  
SB 0.713940 0.711321 0.716580 892.0  
SR 0.707736 0.708261 0.707220 681.0  
macro avg 0.698924 0.701437 0.696714 2077.0  
micro avg 0.706007 0.706007 0.706007 2077.0  
weighted avg 0.705926 0.705979 0.706007 2077.0  
The result of Model Number:Dataset Number:Featuregroup Number:Rescale of 29 : 0 : 5 :  
1

f1-score precision recall support

AFIB 0.858831 0.863545 0.854224 875.0  
GSVT 0.860032 0.849159 0.871322 691.0  
SB 0.904473 0.900843 0.908139 1553.0  
SR 0.885057 0.895801 0.874622 907.0  
macro avg 0.877098 0.877337 0.877077 4026.0

micro avg 0.882552 0.882552 0.882552 4026.0  
weighted avg 0.882551 0.882730 0.882552 4026.0  
The result of Model Number:Dataset Number:Featuregroup Number:Rescale of 29 : 0 : 6 :  
0

|              | f1-score | precision | recall   | support |
|--------------|----------|-----------|----------|---------|
| AFIB         | 0.791590 | 0.851097  | 0.740686 | 204.0   |
| GSVT         | 0.754915 | 0.778878  | 0.732499 | 300.0   |
| SB           | 0.786515 | 0.747595  | 0.829716 | 892.0   |
| SR           | 0.696242 | 0.726169  | 0.668756 | 681.0   |
| macro avg    | 0.757316 | 0.775935  | 0.742914 | 2077.0  |
| micro avg    | 0.754155 | 0.754155  | 0.754155 | 2077.0  |
| weighted avg | 0.752851 | 0.755254  | 0.754155 | 2077.0  |

The result of Model Number:Dataset Number:Featuregroup Number:Rescale of 29 : 0 : 6 :  
1

|              | f1-score | precision | recall   | support |
|--------------|----------|-----------|----------|---------|
| AFIB         | 0.913499 | 0.933820  | 0.894241 | 204.0   |
| GSVT         | 0.952420 | 0.946501  | 0.958449 | 300.0   |
| SB           | 0.973094 | 0.971045  | 0.975164 | 892.0   |
| SR           | 0.962730 | 0.962049  | 0.963442 | 681.0   |
| macro avg    | 0.950436 | 0.953354  | 0.947824 | 2077.0  |
| micro avg    | 0.960958 | 0.960958  | 0.960958 | 2077.0  |
| weighted avg | 0.960856 | 0.960894  | 0.960958 | 2077.0  |

The result of Model Number:Dataset Number:Featuregroup Number:Rescale of 29 : 0 : 7 :  
0

|              | f1-score | precision | recall   | support |
|--------------|----------|-----------|----------|---------|
| AFIB         | 0.815491 | 0.824365  | 0.807044 | 204.0   |
| GSVT         | 0.843088 | 0.839573  | 0.846770 | 300.0   |
| SB           | 0.860365 | 0.859595  | 0.861136 | 892.0   |
| SR           | 0.852234 | 0.852241  | 0.852234 | 681.0   |
| macro avg    | 0.842795 | 0.843943  | 0.841796 | 2077.0  |
| micro avg    | 0.850830 | 0.850830  | 0.850830 | 2077.0  |
| weighted avg | 0.850796 | 0.850832  | 0.850830 | 2077.0  |

The result of Model Number:Dataset Number:Featuregroup Number:Rescale of 29 : 0 : 7 :  
1

|              | f1-score | precision | recall   | support |
|--------------|----------|-----------|----------|---------|
| AFIB         | 0.860867 | 0.872266  | 0.849890 | 204.0   |
| GSVT         | 0.886845 | 0.883644  | 0.890089 | 300.0   |
| SB           | 0.897891 | 0.895097  | 0.900707 | 892.0   |
| SR           | 0.888107 | 0.889818  | 0.886428 | 681.0   |
| macro avg    | 0.883427 | 0.885206  | 0.881778 | 2077.0  |
| micro avg    | 0.889500 | 0.889500  | 0.889500 | 2077.0  |
| weighted avg | 0.889451 | 0.889469  | 0.889500 | 2077.0  |

The result of Model Number:Dataset Number:Featuregroup Number:Rescale of 29 : 0 : 8 :  
0

f1-score precision recall support  
AFIB 0.866547 0.871489 0.861804 204.0  
GSVT 0.884377 0.877998 0.890858 300.0  
SB 0.902238 0.898942 0.905574 892.0  
SR 0.892642 0.898503 0.886880 681.0  
macro avg 0.886451 0.886733 0.886279 2077.0  
micro avg 0.893020 0.893020 0.893020 2077.0  
weighted avg 0.893006 0.893077 0.893020 2077.0  
The result of Model Number:Dataset Number:Featuregroup Number:Rescale of 29 : 0 : 8 :  
1

f1-score precision recall support  
AFIB 0.809605 0.821746 0.798048 204.0  
GSVT 0.838841 0.836614 0.841085 300.0  
SB 0.858712 0.857567 0.859866 892.0  
SR 0.850313 0.849217 0.851440 681.0  
macro avg 0.839368 0.841286 0.837610 2077.0  
micro avg 0.848319 0.848319 0.848319 2077.0  
weighted avg 0.848265 0.848284 0.848319 2077.0  
The result of Model Number:Dataset Number:Featuregroup Number:Rescale of 29 : 0 : 9 :  
0

f1-score precision recall support  
AFIB 0.760529 0.752038 0.769223 875.0  
GSVT 0.775660 0.782765 0.768696 691.0  
SB 0.827277 0.824583 0.829992 1553.0  
SR 0.805831 0.813904 0.797920 907.0  
macro avg 0.792324 0.793322 0.791458 4026.0  
micro avg 0.799039 0.799039 0.799039 4026.0  
weighted avg 0.799080 0.799233 0.799039 4026.0  
The result of Model Number:Dataset Number:Featuregroup Number:Rescale of 29 : 0 : 9 :  
1

f1-score precision recall support  
AFIB 0.864879 0.892109 0.839473 204.0  
GSVT 0.821681 0.839232 0.804986 300.0  
SB 0.848404 0.818716 0.880357 892.0  
SR 0.774807 0.800993 0.750334 681.0  
macro avg 0.827443 0.837763 0.818788 2077.0  
micro avg 0.822823 0.822823 0.822823 2077.0  
weighted avg 0.822031 0.823077 0.822823 2077.0  
The result of Model Number:Dataset Number:Featuregroup Number:Rescale of 29 : 0 :  
10 : 0

f1-score precision recall support  
AFIB 0.745258 0.747545 0.743103 204.0  
GSVT 0.764835 0.762892 0.766857 300.0  
SB 0.781921 0.780966 0.782883 892.0

SR 0.775521 0.777012 0.774042 681.0  
macro avg 0.766884 0.767104 0.766721 2077.0  
micro avg 0.773762 0.773762 0.773762 2077.0  
weighted avg 0.773754 0.773776 0.773762 2077.0  
The result of Model Number:Dataset Number:Featuregroup Number:Rescale of 29 : 0 :  
10 : 1

f1-score precision recall support  
AFIB 0.703782 0.697002 0.710804 875.0  
GSVT 0.722221 0.724287 0.720242 691.0  
SB 0.767846 0.766080 0.769625 1553.0  
SR 0.746246 0.755026 0.737683 907.0  
macro avg 0.735024 0.735599 0.734589 4026.0  
micro avg 0.741169 0.741169 0.741169 4026.0  
weighted avg 0.741225 0.741403 0.741169 4026.0

The result of Model Number:Dataset Number:Featuregroup Number:Rescale of 29 : 1 : 0 :  
0

f1-score precision recall support  
AFIB 0.779124 0.799712 0.759646 204.0  
GSVT 0.800491 0.793841 0.807400 300.0  
SB 0.822549 0.819531 0.825592 892.0  
SR 0.809813 0.810795 0.808856 681.0  
macro avg 0.802995 0.805970 0.800374 2077.0  
micro avg 0.811000 0.811000 0.811000 2077.0  
weighted avg 0.810922 0.811009 0.811000 2077.0

The result of Model Number:Dataset Number:Featuregroup Number:Rescale of 29 : 1 : 0 :  
1

f1-score precision recall support  
AFIB 0.730103 0.741052 0.719681 204.0  
GSVT 0.756468 0.754459 0.758492 300.0  
SB 0.774387 0.773355 0.775428 892.0  
SR 0.766813 0.765824 0.767829 681.0  
macro avg 0.756943 0.758673 0.755357 2077.0  
micro avg 0.765015 0.765015 0.765015 2077.0  
weighted avg 0.764966 0.764984 0.765015 2077.0

The result of Model Number:Dataset Number:Featuregroup Number:Rescale of 29 : 1 : 1 :  
0

f1-score precision recall support  
AFIB 0.807672 0.821695 0.794222 204.0  
GSVT 0.823588 0.821151 0.826057 300.0  
SB 0.833300 0.830335 0.836289 892.0  
SR 0.826525 0.827388 0.825682 681.0  
macro avg 0.822771 0.825142 0.820562 2077.0  
micro avg 0.827201 0.827201 0.827201 2077.0  
weighted avg 0.827158 0.827193 0.827201 2077.0



The result of Model Number:Dataset Number:Featuregroup Number:Rescale of 29 : 1 : 1 : 1

|              | f1-score | precision | recall   | support |
|--------------|----------|-----------|----------|---------|
| AFIB         | 0.664068 | 0.715826  | 0.619599 | 204.0   |
| GSVT         | 0.684319 | 0.695903  | 0.673143 | 300.0   |
| SB           | 0.725249 | 0.718575  | 0.732072 | 892.0   |
| SR           | 0.696384 | 0.686285  | 0.706816 | 681.0   |
| macro avg    | 0.692505 | 0.704147  | 0.682907 | 2077.0  |
| micro avg    | 0.704232 | 0.704232  | 0.704232 | 2077.0  |
| weighted avg | 0.703864 | 0.704443  | 0.704232 | 2077.0  |

The result of Model Number:Dataset Number:Featuregroup Number:Rescale of 29 : 1 : 2 : 0

|              | f1-score | precision | recall   | support |
|--------------|----------|-----------|----------|---------|
| AFIB         | 0.733483 | 0.739880  | 0.727379 | 204.0   |
| GSVT         | 0.758849 | 0.757610  | 0.760111 | 300.0   |
| SB           | 0.774979 | 0.773089  | 0.776888 | 892.0   |
| SR           | 0.767874 | 0.769031  | 0.766746 | 681.0   |
| macro avg    | 0.758796 | 0.759903  | 0.757781 | 2077.0  |
| micro avg    | 0.766277 | 0.766277  | 0.766277 | 2077.0  |
| weighted avg | 0.766244 | 0.766261  | 0.766277 | 2077.0  |

The result of Model Number:Dataset Number:Featuregroup Number:Rescale of 29 : 1 : 2 : 1

|              | f1-score | precision | recall   | support |
|--------------|----------|-----------|----------|---------|
| AFIB         | 0.735181 | 0.741855  | 0.729002 | 204.0   |
| GSVT         | 0.759479 | 0.754889  | 0.764324 | 300.0   |
| SB           | 0.775368 | 0.774329  | 0.776411 | 892.0   |
| SR           | 0.768194 | 0.769786  | 0.766613 | 681.0   |
| macro avg    | 0.759555 | 0.760215  | 0.759087 | 2077.0  |
| micro avg    | 0.766796 | 0.766796  | 0.766796 | 2077.0  |
| weighted avg | 0.766773 | 0.766842  | 0.766796 | 2077.0  |

The result of Model Number:Dataset Number:Featuregroup Number:Rescale of 29 : 1 : 3 : 0

|              | f1-score | precision | recall   | support |
|--------------|----------|-----------|----------|---------|
| AFIB         | 0.737257 | 0.734989  | 0.739585 | 875.0   |
| GSVT         | 0.718463 | 0.721986  | 0.715088 | 691.0   |
| SB           | 0.755306 | 0.723962  | 0.789494 | 1553.0  |
| SR           | 0.650003 | 0.709190  | 0.599986 | 907.0   |
| macro avg    | 0.715257 | 0.722532  | 0.711038 | 4026.0  |
| micro avg    | 0.723183 | 0.723183  | 0.723183 | 4026.0  |
| weighted avg | 0.721336 | 0.722692  | 0.723183 | 4026.0  |

The result of Model Number:Dataset Number:Featuregroup Number:Rescale of 29 : 1 : 3 : 1

|      | f1-score | precision | recall   | support |
|------|----------|-----------|----------|---------|
| AFIB | 0.771466 | 0.823757  | 0.725930 | 204.0   |

GSVT 0.726903 0.748471 0.706818 300.0  
SB 0.759795 0.723322 0.800576 892.0  
SR 0.674179 0.704787 0.646853 681.0  
macro avg 0.733086 0.750084 0.720044 2077.0  
micro avg 0.729300 0.729300 0.729300 2077.0  
weighted avg 0.728119 0.730742 0.729300 2077.0  
The result of Model Number:Dataset Number:Featuregroup Number:Rescale of 29 : 1 : 4 :  
0

f1-score precision recall support  
AFIB 0.820834 0.822873 0.818861 875.0  
GSVT 0.834970 0.837479 0.832582 691.0  
SB 0.885753 0.879741 0.891854 1553.0  
SR 0.868898 0.875348 0.862575 907.0  
macro avg 0.852614 0.853860 0.851468 4026.0  
micro avg 0.859221 0.859221 0.859221 4026.0  
weighted avg 0.859130 0.859138 0.859221 4026.0  
The result of Model Number:Dataset Number:Featuregroup Number:Rescale of 29 : 1 : 4 :  
1

f1-score precision recall support  
AFIB 0.785822 0.839477 0.738949 204.0  
GSVT 0.830692 0.813765 0.848412 300.0  
SB 0.851296 0.843833 0.858925 892.0  
SR 0.830298 0.833063 0.827625 681.0  
macro avg 0.824527 0.832534 0.818478 2077.0  
micro avg 0.835360 0.835360 0.835360 2077.0  
weighted avg 0.835005 0.835531 0.835360 2077.0  
The result of Model Number:Dataset Number:Featuregroup Number:Rescale of 29 : 1 : 5 :  
0

f1-score precision recall support  
AFIB 0.798068 0.809793 0.786751 204.0  
GSVT 0.818289 0.811332 0.825383 300.0  
SB 0.832431 0.829101 0.835790 892.0  
SR 0.824198 0.828244 0.820202 681.0  
macro avg 0.818247 0.819617 0.817032 2077.0  
micro avg 0.824359 0.824359 0.824359 2077.0  
weighted avg 0.824314 0.824357 0.824359 2077.0  
The result of Model Number:Dataset Number:Featuregroup Number:Rescale of 29 : 1 : 5 :  
1

f1-score precision recall support  
AFIB 0.800707 0.806467 0.795030 875.0  
GSVT 0.799431 0.794644 0.804288 691.0  
SB 0.843283 0.833940 0.852840 1553.0  
SR 0.809195 0.823632 0.795282 907.0  
macro avg 0.813154 0.814671 0.811860 4026.0

micro avg 0.818976 0.818976 0.818976 4026.0  
weighted avg 0.818824 0.818902 0.818976 4026.0  
The result of Model Number:Dataset Number:Featuregroup Number:Rescale of 29 : 1 : 6 :  
0

|              | f1-score | precision | recall   | support |
|--------------|----------|-----------|----------|---------|
| AFIB         | 0.739343 | 0.738147  | 0.740609 | 875.0   |
| GSVT         | 0.746118 | 0.749085  | 0.743212 | 691.0   |
| SB           | 0.783554 | 0.780705  | 0.786429 | 1553.0  |
| SR           | 0.770737 | 0.774636  | 0.766920 | 907.0   |
| macro avg    | 0.759938 | 0.760643  | 0.759292 | 4026.0  |
| micro avg    | 0.764658 | 0.764658  | 0.764658 | 4026.0  |
| weighted avg | 0.764633 | 0.764661  | 0.764658 | 4026.0  |

The result of Model Number:Dataset Number:Featuregroup Number:Rescale of 29 : 1 : 6 :  
1

|              | f1-score | precision | recall   | support |
|--------------|----------|-----------|----------|---------|
| AFIB         | 0.884089 | 0.896604  | 0.872643 | 204.0   |
| GSVT         | 0.902444 | 0.885828  | 0.919860 | 300.0   |
| SB           | 0.921678 | 0.911487  | 0.932114 | 892.0   |
| SR           | 0.902308 | 0.920686  | 0.884704 | 681.0   |
| macro avg    | 0.902630 | 0.903651  | 0.902330 | 2077.0  |
| micro avg    | 0.908958 | 0.908958  | 0.908958 | 2077.0  |
| weighted avg | 0.908857 | 0.909335  | 0.908958 | 2077.0  |

The result of Model Number:Dataset Number:Featuregroup Number:Rescale of 29 : 1 : 7 :  
0

|              | f1-score | precision | recall   | support |
|--------------|----------|-----------|----------|---------|
| AFIB         | 0.723403 | 0.729437  | 0.717718 | 204.0   |
| GSVT         | 0.742514 | 0.739094  | 0.745980 | 300.0   |
| SB           | 0.753711 | 0.751034  | 0.756413 | 892.0   |
| SR           | 0.746750 | 0.750095  | 0.743474 | 681.0   |
| macro avg    | 0.741595 | 0.742415  | 0.740896 | 2077.0  |
| micro avg    | 0.746863 | 0.746863  | 0.746863 | 2077.0  |
| weighted avg | 0.746835 | 0.746880  | 0.746863 | 2077.0  |

The result of Model Number:Dataset Number:Featuregroup Number:Rescale of 29 : 1 : 7 :  
1

|              | f1-score | precision | recall   | support |
|--------------|----------|-----------|----------|---------|
| AFIB         | 0.674321 | 0.690339  | 0.659091 | 204.0   |
| GSVT         | 0.696470 | 0.689940  | 0.703198 | 300.0   |
| SB           | 0.711428 | 0.710632  | 0.712225 | 892.0   |
| SR           | 0.704561 | 0.703853  | 0.705282 | 681.0   |
| macro avg    | 0.696695 | 0.698691  | 0.694949 | 2077.0  |
| micro avg    | 0.703426 | 0.703426  | 0.703426 | 2077.0  |
| weighted avg | 0.703371 | 0.703427  | 0.703426 | 2077.0  |

The result of Model Number:Dataset Number:Featuregroup Number:Rescale of 29 : 1 : 8 :  
0

f1-score precision recall support  
AFIB 0.727517 0.742368 0.713570 204.0  
GSVT 0.753934 0.747384 0.760738 300.0  
SB 0.768429 0.767058 0.769808 892.0  
SR 0.761277 0.761731 0.760828 681.0  
macro avg 0.752789 0.754635 0.751236 2077.0  
micro avg 0.760030 0.760030 0.760030 2077.0  
weighted avg 0.759972 0.760044 0.760030 2077.0  
The result of Model Number:Dataset Number:Featuregroup Number:Rescale of 29 : 1 : 8 :  
1

f1-score precision recall support  
AFIB 0.881519 0.877934 0.885156 875.0  
GSVT 0.894404 0.899811 0.889097 691.0  
SB 0.943318 0.942169 0.944472 1553.0  
SR 0.923639 0.925102 0.922207 907.0  
macro avg 0.910720 0.911254 0.910233 4026.0  
micro avg 0.917060 0.917060 0.917060 4026.0  
weighted avg 0.917058 0.917093 0.917060 4026.0  
The result of Model Number:Dataset Number:Featuregroup Number:Rescale of 29 : 1 : 9 :  
0

f1-score precision recall support  
AFIB 0.745978 0.764867 0.728068 204.0  
GSVT 0.762179 0.753890 0.770777 300.0  
SB 0.783646 0.779735 0.787599 892.0  
SR 0.771500 0.774962 0.768100 681.0  
macro avg 0.765826 0.768364 0.763636 2077.0  
micro avg 0.772929 0.772929 0.772929 2077.0  
weighted avg 0.772863 0.772977 0.772929 2077.0  
The result of Model Number:Dataset Number:Featuregroup Number:Rescale of 29 : 1 : 9 :  
1

f1-score precision recall support  
AFIB 0.911087 0.919994 0.902565 875.0  
GSVT 0.904128 0.897268 0.911391 691.0  
SB 0.956670 0.946827 0.966805 1553.0  
SR 0.926304 0.941201 0.912133 907.0  
macro avg 0.924548 0.926323 0.923223 4026.0  
micro avg 0.931015 0.931015 0.931015 4026.0  
weighted avg 0.930904 0.931222 0.931015 4026.0  
The result of Model Number:Dataset Number:Featuregroup Number:Rescale of 29 : 1 :  
10 : 0

f1-score precision recall support  
AFIB 0.740108 0.747293 0.733518 204.0  
GSVT 0.762293 0.758690 0.766132 300.0  
SB 0.777729 0.776862 0.778601 892.0

SR 0.770886 0.771685 0.770094 681.0  
macro avg 0.762754 0.763632 0.762086 2077.0  
micro avg 0.769583 0.769583 0.769583 2077.0  
weighted avg 0.769561 0.769635 0.769583 2077.0  
The result of Model Number:Dataset Number:Featuregroup Number:Rescale of 29 : 1 :  
10 : 1

f1-score precision recall support  
AFIB 0.695149 0.694024 0.696339 875.0  
GSVT 0.701519 0.704308 0.698787 691.0  
SB 0.736717 0.734039 0.739420 1553.0  
SR 0.724666 0.728332 0.721078 907.0  
macro avg 0.714513 0.715176 0.713906 4026.0  
micro avg 0.718950 0.718950 0.718950 4026.0  
weighted avg 0.718927 0.718954 0.718950 4026.0

The result of Model Number:Dataset Number:Featuregroup Number:Rescale of 30 : 0 : 0 :  
0

f1-score precision recall support  
AFIB 0.901852 0.940504 0.866594 204.0  
GSVT 0.932157 0.918073 0.946740 300.0  
SB 0.950646 0.941244 0.960240 892.0  
SR 0.924890 0.932803 0.917146 681.0  
macro avg 0.927387 0.933156 0.922680 2077.0  
micro avg 0.934962 0.934962 0.934962 2077.0  
weighted avg 0.934738 0.935057 0.934962 2077.0

The result of Model Number:Dataset Number:Featuregroup Number:Rescale of 30 : 0 : 0 :  
1

f1-score precision recall support  
AFIB 0.889621 0.900545 0.879098 204.0  
GSVT 0.907540 0.903664 0.911471 300.0  
SB 0.918526 0.915769 0.921304 892.0  
SR 0.910795 0.912962 0.908666 681.0  
macro avg 0.906620 0.908235 0.905135 2077.0  
micro avg 0.911595 0.911595 0.911595 2077.0  
weighted avg 0.911565 0.911605 0.911595 2077.0

The result of Model Number:Dataset Number:Featuregroup Number:Rescale of 30 : 0 : 1 :  
0

f1-score precision recall support  
AFIB 0.743325 0.793709 0.699450 204.0  
GSVT 0.700388 0.721168 0.681035 300.0  
SB 0.732080 0.696937 0.771373 892.0  
SR 0.649586 0.679078 0.623258 681.0  
macro avg 0.706345 0.722723 0.693779 2077.0  
micro avg 0.702697 0.702697 0.702697 2077.0  
weighted avg 0.701559 0.704086 0.702697 2077.0

The result of Model Number:Dataset Number:Featuregroup Number:Rescale of 30 : 0 : 1 :  
1

|              | f1-score | precision | recall   | support |
|--------------|----------|-----------|----------|---------|
| AFIB         | 0.762129 | 0.785687  | 0.740607 | 204.0   |
| GSVT         | 0.711438 | 0.726904  | 0.697141 | 300.0   |
| SB           | 0.750387 | 0.717083  | 0.786972 | 892.0   |
| SR           | 0.675641 | 0.710360  | 0.644254 | 681.0   |
| macro avg    | 0.724899 | 0.735009  | 0.717243 | 2077.0  |
| micro avg    | 0.722649 | 0.722649  | 0.722649 | 2077.0  |
| weighted avg | 0.721407 | 0.723036  | 0.722649 | 2077.0  |

The result of Model Number:Dataset Number:Featuregroup Number:Rescale of 30 : 0 : 2 :  
0

|              | f1-score | precision | recall   | support |
|--------------|----------|-----------|----------|---------|
| AFIB         | 0.700962 | 0.696224  | 0.705859 | 875.0   |
| GSVT         | 0.718063 | 0.718349  | 0.717870 | 691.0   |
| SB           | 0.762796 | 0.760849  | 0.764760 | 1553.0  |
| SR           | 0.742026 | 0.750316  | 0.733926 | 907.0   |
| macro avg    | 0.730961 | 0.731435  | 0.730604 | 4026.0  |
| micro avg    | 0.736964 | 0.736964  | 0.736964 | 4026.0  |
| weighted avg | 0.737000 | 0.737136  | 0.736964 | 4026.0  |

The result of Model Number:Dataset Number:Featuregroup Number:Rescale of 30 : 0 : 2 :  
1

|              | f1-score | precision | recall   | support |
|--------------|----------|-----------|----------|---------|
| AFIB         | 0.666711 | 0.710151  | 0.628574 | 204.0   |
| GSVT         | 0.695918 | 0.678813  | 0.714003 | 300.0   |
| SB           | 0.716328 | 0.707126  | 0.725797 | 892.0   |
| SR           | 0.697722 | 0.706053  | 0.689632 | 681.0   |
| macro avg    | 0.694170 | 0.700536  | 0.689502 | 2077.0  |
| micro avg    | 0.702687 | 0.702687  | 0.702687 | 2077.0  |
| weighted avg | 0.702406 | 0.702982  | 0.702687 | 2077.0  |

The result of Model Number:Dataset Number:Featuregroup Number:Rescale of 30 : 0 : 3 :  
0

|              | f1-score | precision | recall   | support |
|--------------|----------|-----------|----------|---------|
| AFIB         | 0.797999 | 0.802363  | 0.793709 | 875.0   |
| GSVT         | 0.794196 | 0.787500  | 0.801087 | 691.0   |
| SB           | 0.835296 | 0.827386  | 0.843363 | 1553.0  |
| SR           | 0.804209 | 0.819210  | 0.789758 | 907.0   |
| macro avg    | 0.807925 | 0.809115  | 0.806979 | 4026.0  |
| micro avg    | 0.813239 | 0.813239  | 0.813239 | 4026.0  |
| weighted avg | 0.813132 | 0.813260  | 0.813239 | 4026.0  |

The result of Model Number:Dataset Number:Featuregroup Number:Rescale of 30 : 0 : 3 :  
1

|      | f1-score | precision | recall   | support |
|------|----------|-----------|----------|---------|
| AFIB | 0.801937 | 0.802653  | 0.801306 | 875.0   |

GSVT 0.816627 0.818769 0.814633 691.0  
SB 0.866860 0.861089 0.872719 1553.0  
SR 0.849970 0.857730 0.842380 907.0  
macro avg 0.833849 0.835060 0.832759 4026.0  
micro avg 0.840394 0.840394 0.840394 4026.0  
weighted avg 0.840323 0.840368 0.840394 4026.0  
The result of Model Number:Dataset Number:Featuregroup Number:Rescale of 30 : 0 : 4 :  
0

f1-score precision recall support  
AFIB 0.788050 0.802552 0.774464 204.0  
GSVT 0.817125 0.810281 0.824227 300.0  
SB 0.832468 0.831073 0.833868 892.0  
SR 0.825118 0.825851 0.824391 681.0  
macro avg 0.815690 0.817439 0.814237 2077.0  
micro avg 0.823534 0.823534 0.823534 2077.0  
weighted avg 0.823479 0.823557 0.823534 2077.0  
The result of Model Number:Dataset Number:Featuregroup Number:Rescale of 30 : 0 : 4 :  
1

f1-score precision recall support  
AFIB 0.613587 0.673740 0.563895 204.0  
GSVT 0.719900 0.710197 0.729988 300.0  
SB 0.764309 0.761759 0.766879 892.0  
SR 0.744446 0.734465 0.754720 681.0  
macro avg 0.710560 0.720040 0.703870 2077.0  
micro avg 0.737627 0.737627 0.737627 2077.0  
weighted avg 0.736578 0.736717 0.737627 2077.0  
The result of Model Number:Dataset Number:Featuregroup Number:Rescale of 30 : 0 : 5 :  
0

f1-score precision recall support  
AFIB 0.662003 0.657834 0.745701 204.0  
GSVT 0.806993 0.802842 0.811322 300.0  
SB 0.829970 0.826021 0.833966 892.0  
SR 0.651018 0.653163 0.649280 681.0  
macro avg 0.737496 0.734965 0.760067 2077.0  
micro avg 0.761472 0.761472 0.761472 2077.0  
weighted avg 0.751480 0.749478 0.761472 2077.0  
The result of Model Number:Dataset Number:Featuregroup Number:Rescale of 30 : 0 : 5 :  
1

f1-score precision recall support  
AFIB 0.805763 0.784596 0.856206 875.0  
GSVT 0.775136 0.733676 0.883639 691.0  
SB 0.734482 0.729840 0.739205 1553.0  
SR 0.713433 0.725725 0.701749 907.0  
macro avg 0.757203 0.743459 0.795200 4026.0

micro avg 0.780985 0.780985 0.780985 4026.0  
weighted avg 0.752210 0.741472 0.780985 4026.0  
The result of Model Number:Dataset Number:Featuregroup Number:Rescale of 30 : 0 : 6 :  
0

|              | f1-score | precision | recall   | support |
|--------------|----------|-----------|----------|---------|
| AFIB         | 0.763679 | 0.775388  | 0.752444 | 204.0   |
| GSVT         | 0.781787 | 0.775154  | 0.788567 | 300.0   |
| SB           | 0.795386 | 0.792819  | 0.797972 | 892.0   |
| SR           | 0.787213 | 0.790135  | 0.784322 | 681.0   |
| macro avg    | 0.782016 | 0.783374  | 0.780826 | 2077.0  |
| micro avg    | 0.787666 | 0.787666  | 0.787666 | 2077.0  |
| weighted avg | 0.787628 | 0.787676  | 0.787666 | 2077.0  |

The result of Model Number:Dataset Number:Featuregroup Number:Rescale of 30 : 0 : 6 :  
1

|              | f1-score | precision | recall   | support |
|--------------|----------|-----------|----------|---------|
| AFIB         | 0.827317 | 0.858094  | 0.799042 | 204.0   |
| GSVT         | 0.767719 | 0.803345  | 0.735190 | 300.0   |
| SB           | 0.804216 | 0.755710  | 0.859391 | 892.0   |
| SR           | 0.706257 | 0.755327  | 0.663256 | 681.0   |
| macro avg    | 0.776377 | 0.793119  | 0.764220 | 2077.0  |
| micro avg    | 0.771216 | 0.771216  | 0.771216 | 2077.0  |
| weighted avg | 0.769095 | 0.772521  | 0.771216 | 2077.0  |

The result of Model Number:Dataset Number:Featuregroup Number:Rescale of 30 : 0 : 7 :  
0

|              | f1-score | precision | recall   | support |
|--------------|----------|-----------|----------|---------|
| AFIB         | 0.774211 | 0.769335  | 0.872095 | 204.0   |
| GSVT         | 0.943776 | 0.938921  | 0.948839 | 300.0   |
| SB           | 0.970648 | 0.966030  | 0.975321 | 892.0   |
| SR           | 0.761364 | 0.763872  | 0.759331 | 681.0   |
| macro avg    | 0.862500 | 0.859540  | 0.888897 | 2077.0  |
| micro avg    | 0.890539 | 0.890539  | 0.890539 | 2077.0  |
| weighted avg | 0.878853 | 0.876512  | 0.890539 | 2077.0  |

The result of Model Number:Dataset Number:Featuregroup Number:Rescale of 30 : 0 : 7 :  
1

|              | f1-score | precision | recall   | support |
|--------------|----------|-----------|----------|---------|
| AFIB         | 0.893030 | 0.898375  | 0.887794 | 204.0   |
| GSVT         | 0.916820 | 0.914095  | 0.919568 | 300.0   |
| SB           | 0.930859 | 0.929719  | 0.932006 | 892.0   |
| SR           | 0.924074 | 0.925164  | 0.922993 | 681.0   |
| macro avg    | 0.916196 | 0.916838  | 0.915590 | 2077.0  |
| micro avg    | 0.922912 | 0.922912  | 0.922912 | 2077.0  |
| weighted avg | 0.922891 | 0.922890  | 0.922912 | 2077.0  |

The result of Model Number:Dataset Number:Featuregroup Number:Rescale of 30 : 0 : 8 :  
0



f1-score precision recall support  
AFIB 0.834464 0.870228 0.801841 204.0  
GSVT 0.862505 0.849473 0.875998 300.0  
SB 0.879612 0.870913 0.888489 892.0  
SR 0.855781 0.863103 0.848615 681.0  
macro avg 0.858091 0.863429 0.853736 2077.0  
micro avg 0.865101 0.865101 0.865101 2077.0  
weighted avg 0.864893 0.865188 0.865101 2077.0  
The result of Model Number:Dataset Number:Featuregroup Number:Rescale of 30 : 0 : 8 :  
1

f1-score precision recall support  
AFIB 0.620087 0.688170 0.564412 204.0  
GSVT 0.724036 0.714984 0.733462 300.0  
SB 0.770339 0.766408 0.774311 892.0  
SR 0.752293 0.741775 0.763116 681.0  
macro avg 0.716689 0.727834 0.708825 2077.0  
micro avg 0.744124 0.744124 0.744124 2077.0  
weighted avg 0.742976 0.743219 0.744124 2077.0  
The result of Model Number:Dataset Number:Featuregroup Number:Rescale of 30 : 0 : 9 :  
0

f1-score precision recall support  
AFIB 0.711316 0.703457 0.719367 875.0  
GSVT 0.724132 0.728591 0.719740 691.0  
SB 0.770700 0.769417 0.771990 1553.0  
SR 0.751934 0.758965 0.745051 907.0  
macro avg 0.739521 0.740107 0.739037 4026.0  
micro avg 0.745516 0.745516 0.745516 4026.0  
weighted avg 0.745573 0.745720 0.745516 4026.0  
The result of Model Number:Dataset Number:Featuregroup Number:Rescale of 30 : 0 : 9 :  
1

f1-score precision recall support  
AFIB 0.644691 0.702291 0.680808 204.0  
GSVT 0.875670 0.861355 0.890770 300.0  
SB 0.745465 0.739787 0.751287 892.0  
SR 0.911583 0.901268 0.922163 681.0  
macro avg 0.794352 0.801175 0.811257 2077.0  
micro avg 0.820538 0.820538 0.820538 2077.0  
weighted avg 0.808840 0.806609 0.820538 2077.0  
The result of Model Number:Dataset Number:Featuregroup Number:Rescale of 30 : 0 :  
10 : 0

f1-score precision recall support  
AFIB 0.644770 0.650110 0.726245 204.0  
GSVT 0.699209 0.669282 0.788872 300.0  
SB 0.638404 0.636186 0.640640 892.0

SR 0.632056 0.632176 0.631941 681.0  
macro avg 0.653610 0.646938 0.696924 2077.0  
micro avg 0.667606 0.667606 0.667606 2077.0  
weighted avg 0.645731 0.641019 0.667606 2077.0  
The result of Model Number:Dataset Number:Featuregroup Number:Rescale of 30 : 0 :  
10 : 1

f1-score precision recall support  
AFIB 0.851655 0.841060 0.862615 875.0  
GSVT 0.878318 0.889317 0.867676 691.0  
SB 0.937043 0.936028 0.938067 1553.0  
SR 0.911770 0.916445 0.907146 907.0  
macro avg 0.894696 0.895713 0.893876 4026.0  
micro avg 0.902621 0.902621 0.902621 4026.0  
weighted avg 0.902712 0.902959 0.902621 4026.0  
The result of Model Number:Dataset Number:Featuregroup Number:Rescale of 30 : 1 : 0 :  
0

f1-score precision recall support  
AFIB 0.643722 0.702023 0.595435 204.0  
GSVT 0.747157 0.738620 0.756125 300.0  
SB 0.792316 0.790288 0.794359 892.0  
SR 0.772917 0.762451 0.783697 681.0  
macro avg 0.739028 0.748345 0.732404 2077.0  
micro avg 0.765803 0.765803 0.765803 2077.0  
weighted avg 0.764838 0.765029 0.765803 2077.0  
The result of Model Number:Dataset Number:Featuregroup Number:Rescale of 30 : 1 : 0 :  
1

f1-score precision recall support  
AFIB 0.801144 0.808947 0.793684 204.0  
GSVT 0.819670 0.815906 0.823496 300.0  
SB 0.830997 0.828138 0.833882 892.0  
SR 0.823979 0.827176 0.820846 681.0  
macro avg 0.818947 0.820042 0.817977 2077.0  
micro avg 0.824159 0.824159 0.824159 2077.0  
weighted avg 0.824128 0.824171 0.824159 2077.0  
The result of Model Number:Dataset Number:Featuregroup Number:Rescale of 30 : 1 : 1 :  
0

f1-score precision recall support  
AFIB 0.885376 0.873622 0.897519 875.0  
GSVT 0.903346 0.911910 0.894981 691.0  
SB 0.961290 0.959016 0.963579 1553.0  
SR 0.935212 0.945045 0.925619 907.0  
macro avg 0.921306 0.922398 0.920425 4026.0  
micro avg 0.928896 0.928896 0.928896 4026.0  
weighted avg 0.928971 0.929224 0.928896 4026.0

The result of Model Number:Dataset Number:Featuregroup Number:Rescale of 30 : 1 : 1 : 1

|              | f1-score | precision | recall   | support |
|--------------|----------|-----------|----------|---------|
| AFIB         | 0.833200 | 0.853145  | 0.815386 | 204.0   |
| GSVT         | 0.857736 | 0.845650  | 0.870530 | 300.0   |
| SB           | 0.880022 | 0.871082  | 0.889189 | 892.0   |
| SR           | 0.858989 | 0.871392  | 0.847002 | 681.0   |
| macro avg    | 0.857487 | 0.860317  | 0.855527 | 2077.0  |
| micro avg    | 0.865413 | 0.865413  | 0.865413 | 2077.0  |
| weighted avg | 0.865308 | 0.865748  | 0.865413 | 2077.0  |

The result of Model Number:Dataset Number:Featuregroup Number:Rescale of 30 : 1 : 2 : 0

|              | f1-score | precision | recall   | support |
|--------------|----------|-----------|----------|---------|
| AFIB         | 0.848519 | 0.876079  | 0.822807 | 204.0   |
| GSVT         | 0.871946 | 0.860828  | 0.883530 | 300.0   |
| SB           | 0.896545 | 0.893165  | 0.899961 | 892.0   |
| SR           | 0.884006 | 0.885607  | 0.882445 | 681.0   |
| macro avg    | 0.875254 | 0.878920  | 0.872186 | 2077.0  |
| micro avg    | 0.884267 | 0.884267  | 0.884267 | 2077.0  |
| weighted avg | 0.884164 | 0.884338  | 0.884267 | 2077.0  |

The result of Model Number:Dataset Number:Featuregroup Number:Rescale of 30 : 1 : 2 : 1

|              | f1-score | precision | recall   | support |
|--------------|----------|-----------|----------|---------|
| AFIB         | 0.699644 | 0.713926  | 0.686231 | 204.0   |
| GSVT         | 0.725049 | 0.718750  | 0.731592 | 300.0   |
| SB           | 0.738989 | 0.737670  | 0.740315 | 892.0   |
| SR           | 0.732111 | 0.732547  | 0.731679 | 681.0   |
| macro avg    | 0.723948 | 0.725723  | 0.722454 | 2077.0  |
| micro avg    | 0.730912 | 0.730912  | 0.730912 | 2077.0  |
| weighted avg | 0.730856 | 0.730926  | 0.730912 | 2077.0  |

The result of Model Number:Dataset Number:Featuregroup Number:Rescale of 30 : 1 : 3 : 0

|              | f1-score | precision | recall   | support |
|--------------|----------|-----------|----------|---------|
| AFIB         | 0.666859 | 0.687233  | 0.647733 | 875.0   |
| GSVT         | 0.707681 | 0.705284  | 0.710156 | 691.0   |
| SB           | 0.773314 | 0.770207  | 0.776449 | 1553.0  |
| SR           | 0.732415 | 0.719711  | 0.745647 | 907.0   |
| macro avg    | 0.720067 | 0.720609  | 0.719996 | 4026.0  |
| micro avg    | 0.730157 | 0.730157  | 0.730157 | 4026.0  |
| weighted avg | 0.729698 | 0.729655  | 0.730157 | 4026.0  |

The result of Model Number:Dataset Number:Featuregroup Number:Rescale of 30 : 1 : 3 : 1

|      | f1-score | precision | recall   | support |
|------|----------|-----------|----------|---------|
| AFIB | 0.828735 | 0.882732  | 0.781330 | 204.0   |

GSVT 0.865041 0.843778 0.887520 300.0  
SB 0.890410 0.878972 0.902181 892.0  
SR 0.867283 0.877639 0.857226 681.0  
macro avg 0.862867 0.870780 0.857064 2077.0  
micro avg 0.873454 0.873454 0.873454 2077.0  
weighted avg 0.873105 0.873821 0.873454 2077.0  
The result of Model Number:Dataset Number:Featuregroup Number:Rescale of 30 : 1 : 4 :  
0

f1-score precision recall support  
AFIB 0.633103 0.628066 0.638281 875.0  
GSVT 0.608000 0.596440 0.620068 691.0  
SB 0.638118 0.589039 0.696131 1553.0  
SR 0.488621 0.624774 0.401283 907.0  
macro avg 0.591961 0.609580 0.588941 4026.0  
micro avg 0.604078 0.604078 0.604078 4026.0  
weighted avg 0.598179 0.606842 0.604078 4026.0  
The result of Model Number:Dataset Number:Featuregroup Number:Rescale of 30 : 1 : 4 :  
1

f1-score precision recall support  
AFIB 0.790724 0.805256 0.776805 204.0  
GSVT 0.804006 0.798741 0.809363 300.0  
SB 0.817759 0.813767 0.821793 892.0  
SR 0.809307 0.812672 0.805981 681.0  
macro avg 0.805449 0.807609 0.803486 2077.0  
micro avg 0.810395 0.810395 0.810395 2077.0  
weighted avg 0.810346 0.810401 0.810395 2077.0  
The result of Model Number:Dataset Number:Featuregroup Number:Rescale of 30 : 1 : 5 :  
0

f1-score precision recall support  
AFIB 0.846279 0.850719 0.841937 875.0  
GSVT 0.863975 0.862423 0.865594 691.0  
SB 0.938129 0.930934 0.945437 1553.0  
SR 0.905031 0.914089 0.896155 907.0  
macro avg 0.888353 0.889541 0.887281 4026.0  
micro avg 0.898136 0.898136 0.898136 4026.0  
weighted avg 0.897983 0.897947 0.898136 4026.0  
The result of Model Number:Dataset Number:Featuregroup Number:Rescale of 30 : 1 : 5 :  
1

f1-score precision recall support  
AFIB 0.900420 0.922328 0.879751 204.0  
GSVT 0.911739 0.899187 0.924767 300.0  
SB 0.930149 0.920860 0.939633 892.0  
SR 0.913909 0.925902 0.902248 681.0  
macro avg 0.914054 0.917069 0.911600 2077.0

micro avg 0.919347 0.919347 0.919347 2077.0  
weighted avg 0.919245 0.919527 0.919347 2077.0  
The result of Model Number:Dataset Number:Featuregroup Number:Rescale of 30 : 1 : 6 :  
0

|              | f1-score | precision | recall   | support |
|--------------|----------|-----------|----------|---------|
| AFIB         | 0.693455 | 0.702832  | 0.684615 | 204.0   |
| GSVT         | 0.719795 | 0.718626  | 0.720992 | 300.0   |
| SB           | 0.735426 | 0.734446  | 0.736415 | 892.0   |
| SR           | 0.727909 | 0.726976  | 0.728870 | 681.0   |
| macro avg    | 0.719146 | 0.720720  | 0.717723 | 2077.0  |
| micro avg    | 0.726626 | 0.726626  | 0.726626 | 2077.0  |
| weighted avg | 0.726581 | 0.726607  | 0.726626 | 2077.0  |

The result of Model Number:Dataset Number:Featuregroup Number:Rescale of 30 : 1 : 6 :  
1

|              | f1-score | precision | recall   | support |
|--------------|----------|-----------|----------|---------|
| AFIB         | 0.779431 | 0.756135  | 0.831076 | 875.0   |
| GSVT         | 0.667467 | 0.652851  | 0.683000 | 691.0   |
| SB           | 0.885316 | 0.878102  | 0.892884 | 1553.0  |
| SR           | 0.830554 | 0.865424  | 0.799943 | 907.0   |
| macro avg    | 0.790692 | 0.788128  | 0.801726 | 4026.0  |
| micro avg    | 0.822489 | 0.822489  | 0.822489 | 4026.0  |
| weighted avg | 0.812576 | 0.810077  | 0.822489 | 4026.0  |

The result of Model Number:Dataset Number:Featuregroup Number:Rescale of 30 : 1 : 7 :  
0

|              | f1-score | precision | recall   | support |
|--------------|----------|-----------|----------|---------|
| AFIB         | 0.778996 | 0.792521  | 0.766024 | 204.0   |
| GSVT         | 0.794347 | 0.791996  | 0.796728 | 300.0   |
| SB           | 0.803714 | 0.800854  | 0.806597 | 892.0   |
| SR           | 0.797179 | 0.798012  | 0.796367 | 681.0   |
| macro avg    | 0.793559 | 0.795846  | 0.791429 | 2077.0  |
| micro avg    | 0.797832 | 0.797832  | 0.797832 | 2077.0  |
| weighted avg | 0.797790 | 0.797824  | 0.797832 | 2077.0  |

The result of Model Number:Dataset Number:Featuregroup Number:Rescale of 30 : 1 : 7 :  
1

|              | f1-score | precision | recall   | support |
|--------------|----------|-----------|----------|---------|
| AFIB         | 0.745699 | 0.774676  | 0.718866 | 875.0   |
| GSVT         | 0.801651 | 0.795731  | 0.807766 | 691.0   |
| SB           | 0.880953 | 0.876414  | 0.885545 | 1553.0  |
| SR           | 0.829057 | 0.813247  | 0.845582 | 907.0   |
| macro avg    | 0.814340 | 0.815017  | 0.814440 | 4026.0  |
| micro avg    | 0.826967 | 0.826967  | 0.826967 | 4026.0  |
| weighted avg | 0.826255 | 0.826224  | 0.826967 | 4026.0  |

The result of Model Number:Dataset Number:Featuregroup Number:Rescale of 30 : 1 : 8 :  
0

f1-score precision recall support  
AFIB 0.688103 0.739830 0.643854 204.0  
GSVT 0.656223 0.677053 0.636737 300.0  
SB 0.683691 0.649860 0.721245 892.0  
SR 0.605220 0.631234 0.581328 681.0  
macro avg 0.658309 0.674494 0.645791 2077.0  
micro avg 0.655562 0.655562 0.655562 2077.0  
weighted avg 0.654428 0.656517 0.655562 2077.0  
The result of Model Number:Dataset Number:Featuregroup Number:Rescale of 30 : 1 : 8 :  
1

f1-score precision recall support  
AFIB 0.763994 0.770050 0.758052 875.0  
GSVT 0.773680 0.770269 0.777147 691.0  
SB 0.822717 0.819465 0.826001 1553.0  
SR 0.802500 0.804768 0.800284 907.0  
macro avg 0.790723 0.791138 0.790371 4026.0  
micro avg 0.797055 0.797055 0.797055 4026.0  
weighted avg 0.796983 0.796970 0.797055 4026.0  
The result of Model Number:Dataset Number:Featuregroup Number:Rescale of 30 : 1 : 9 :  
0

f1-score precision recall support  
AFIB 0.713434 0.709166 0.717850 875.0  
GSVT 0.719276 0.723160 0.715539 691.0  
SB 0.762325 0.760097 0.764578 1553.0  
SR 0.745100 0.750452 0.739838 907.0  
macro avg 0.735034 0.735719 0.734451 4026.0  
micro avg 0.740432 0.740432 0.740432 4026.0  
weighted avg 0.740430 0.740515 0.740432 4026.0  
The result of Model Number:Dataset Number:Featuregroup Number:Rescale of 30 : 1 : 9 :  
1

f1-score precision recall support  
AFIB 0.803092 0.791689 0.814917 875.0  
GSVT 0.832216 0.842833 0.821989 691.0  
SB 0.884416 0.883118 0.885726 1553.0  
SR 0.862383 0.868852 0.856012 907.0  
macro avg 0.845527 0.846623 0.844661 4026.0  
micro avg 0.852703 0.852703 0.852703 4026.0  
weighted avg 0.852818 0.853119 0.852703 4026.0  
The result of Model Number:Dataset Number:Featuregroup Number:Rescale of 30 : 1 :  
10 : 0

f1-score precision recall support  
AFIB 0.816805 0.814443 0.819255 875.0  
GSVT 0.831943 0.831267 0.832679 691.0  
SB 0.883645 0.879985 0.887342 1553.0

SR 0.857117 0.866533 0.847949 907.0  
macro avg 0.847377 0.848057 0.846806 4026.0  
micro avg 0.854287 0.854287 0.854287 4026.0  
weighted avg 0.854268 0.854348 0.854287 4026.0  
The result of Model Number:Dataset Number:Featuregroup Number:Rescale of 30 : 1 : 10 : 1

f1-score precision recall support  
AFIB 0.678459 0.673269 0.683819 875.0  
GSVT 0.694069 0.697865 0.690356 691.0  
SB 0.734963 0.734449 0.735484 1553.0  
SR 0.715442 0.718912 0.712042 907.0  
macro avg 0.705733 0.706124 0.705425 4026.0  
micro avg 0.711228 0.711228 0.711228 4026.0  
weighted avg 0.711266 0.711373 0.711228 4026.0

The result of Model Number:Dataset Number:Featuregroup Number:Rescale of 31 : 0 : 0 : 0

f1-score precision recall support  
AFIB 0.735006 0.749750 0.720976 204.0  
GSVT 0.752040 0.744223 0.760063 300.0  
SB 0.765949 0.762969 0.768954 892.0  
SR 0.757900 0.761062 0.754781 681.0  
macro avg 0.752724 0.754501 0.751194 2077.0  
micro avg 0.758310 0.758310 0.758310 2077.0  
weighted avg 0.758262 0.758338 0.758310 2077.0

The result of Model Number:Dataset Number:Featuregroup Number:Rescale of 31 : 0 : 0 : 1

f1-score precision recall support  
AFIB 0.732229 0.737705 0.726862 204.0  
GSVT 0.750939 0.746976 0.754945 300.0  
SB 0.763612 0.762590 0.764638 892.0  
SR 0.756886 0.758337 0.755442 681.0  
macro avg 0.750916 0.751402 0.750472 2077.0  
micro avg 0.756513 0.756513 0.756513 2077.0  
weighted avg 0.756494 0.756496 0.756513 2077.0

The result of Model Number:Dataset Number:Featuregroup Number:Rescale of 31 : 0 : 1 : 0

f1-score precision recall support  
AFIB 0.827843 0.838008 0.818051 204.0  
GSVT 0.844518 0.840911 0.848176 300.0  
SB 0.854740 0.852175 0.857325 892.0  
SR 0.847546 0.849563 0.845566 681.0  
macro avg 0.843662 0.845164 0.842279 2077.0  
micro avg 0.848291 0.848291 0.848291 2077.0  
weighted avg 0.848263 0.848300 0.848291 2077.0

The result of Model Number:Dataset Number:Featuregroup Number:Rescale of 31 : 0 : 1 : 1

|              | f1-score | precision | recall   | support |
|--------------|----------|-----------|----------|---------|
| AFIB         | 0.681454 | 0.686400  | 0.676628 | 875.0   |
| GSVT         | 0.696402 | 0.689930  | 0.703050 | 691.0   |
| SB           | 0.748428 | 0.743910  | 0.753007 | 1553.0  |
| SR           | 0.723900 | 0.731983  | 0.715996 | 907.0   |
| macro avg    | 0.712546 | 0.713056  | 0.712170 | 4026.0  |
| micro avg    | 0.719494 | 0.719494  | 0.719494 | 4026.0  |
| weighted avg | 0.719417 | 0.719459  | 0.719494 | 4026.0  |

The result of Model Number:Dataset Number:Featuregroup Number:Rescale of 31 : 0 : 2 : 0

|              | f1-score | precision | recall   | support |
|--------------|----------|-----------|----------|---------|
| AFIB         | 0.893040 | 0.909423  | 0.877305 | 204.0   |
| GSVT         | 0.904818 | 0.895687  | 0.914156 | 300.0   |
| SB           | 0.927106 | 0.922280  | 0.931989 | 892.0   |
| SR           | 0.914484 | 0.920215  | 0.908845 | 681.0   |
| macro avg    | 0.909862 | 0.911901  | 0.908074 | 2077.0  |
| micro avg    | 0.916454 | 0.916454  | 0.916454 | 2077.0  |
| weighted avg | 0.916402 | 0.916499  | 0.916454 | 2077.0  |

The result of Model Number:Dataset Number:Featuregroup Number:Rescale of 31 : 0 : 2 : 1

|              | f1-score | precision | recall   | support |
|--------------|----------|-----------|----------|---------|
| AFIB         | 0.916811 | 0.918649  | 0.915020 | 875.0   |
| GSVT         | 0.919082 | 0.914120  | 0.924122 | 691.0   |
| SB           | 0.960749 | 0.955616  | 0.965944 | 1553.0  |
| SR           | 0.937765 | 0.948885  | 0.926928 | 907.0   |
| macro avg    | 0.933602 | 0.934318  | 0.933004 | 4026.0  |
| micro avg    | 0.938908 | 0.938908  | 0.938908 | 4026.0  |
| weighted avg | 0.938870 | 0.938943  | 0.938908 | 4026.0  |

The result of Model Number:Dataset Number:Featuregroup Number:Rescale of 31 : 0 : 3 : 0

|              | f1-score | precision | recall   | support |
|--------------|----------|-----------|----------|---------|
| AFIB         | 0.763166 | 0.772537  | 0.754139 | 204.0   |
| GSVT         | 0.778538 | 0.775212  | 0.781910 | 300.0   |
| SB           | 0.787962 | 0.785596  | 0.790345 | 892.0   |
| SR           | 0.781330 | 0.783189  | 0.779504 | 681.0   |
| macro avg    | 0.777749 | 0.779134  | 0.776474 | 2077.0  |
| micro avg    | 0.782016 | 0.782016  | 0.782016 | 2077.0  |
| weighted avg | 0.781991 | 0.782024  | 0.782016 | 2077.0  |

The result of Model Number:Dataset Number:Featuregroup Number:Rescale of 31 : 0 : 3 : 1

|      | f1-score | precision | recall   | support |
|------|----------|-----------|----------|---------|
| AFIB | 0.803818 | 0.810172  | 0.797589 | 875.0   |



GSVT 0.824044 0.822302 0.825824 691.0  
SB 0.878455 0.870691 0.886370 1553.0  
SR 0.855070 0.863456 0.846866 907.0  
macro avg 0.840347 0.841655 0.839162 4026.0  
micro avg 0.847783 0.847783 0.847783 4026.0  
weighted avg 0.847626 0.847603 0.847783 4026.0  
The result of Model Number:Dataset Number:Featuregroup Number:Rescale of 31 : 0 : 4 :  
0

f1-score precision recall support

AFIB 0.862933 0.865902 0.860093 875.0  
GSVT 0.879316 0.861772 0.897747 691.0  
SB 0.930826 0.925792 0.935920 1553.0  
SR 0.894824 0.915629 0.874996 907.0  
macro avg 0.891975 0.892274 0.892189 4026.0  
micro avg 0.899163 0.899163 0.899163 4026.0  
weighted avg 0.899119 0.899498 0.899163 4026.0  
The result of Model Number:Dataset Number:Featuregroup Number:Rescale of 31 : 0 : 4 :  
1

f1-score precision recall support

AFIB 0.734253 0.762785 0.707832 875.0  
GSVT 0.789346 0.783517 0.795367 691.0  
SB 0.867431 0.862962 0.871953 1553.0  
SR 0.816331 0.800765 0.832603 907.0  
macro avg 0.801840 0.802507 0.801939 4026.0  
micro avg 0.814273 0.814273 0.814273 4026.0  
weighted avg 0.813572 0.813542 0.814273 4026.0  
The result of Model Number:Dataset Number:Featuregroup Number:Rescale of 31 : 0 : 5 :  
0

f1-score precision recall support

AFIB 0.729308 0.714579 0.744714 875.0  
GSVT 0.753487 0.765468 0.742039 691.0  
SB 0.801722 0.801677 0.801773 1553.0  
SR 0.782284 0.789412 0.775296 907.0  
macro avg 0.766700 0.767784 0.765955 4026.0  
micro avg 0.773155 0.773155 0.773155 4026.0  
weighted avg 0.773326 0.773769 0.773155 4026.0  
The result of Model Number:Dataset Number:Featuregroup Number:Rescale of 31 : 0 : 5 :  
1

f1-score precision recall support

AFIB 0.761209 0.794616 0.730689 204.0  
GSVT 0.708636 0.713738 0.703897 300.0  
SB 0.734911 0.698006 0.775939 892.0  
SR 0.651981 0.695028 0.614093 681.0  
macro avg 0.714184 0.725347 0.706155 2077.0

micro avg 0.708024 0.708024 0.708024 2077.0  
weighted avg 0.706508 0.708791 0.708024 2077.0  
The result of Model Number:Dataset Number:Featuregroup Number:Rescale of 31 : 0 : 6 :  
0

|              | f1-score | precision | recall   | support |
|--------------|----------|-----------|----------|---------|
| AFIB         | 0.825738 | 0.824750  | 0.826868 | 875.0   |
| GSVT         | 0.841835 | 0.844730  | 0.839045 | 691.0   |
| SB           | 0.891628 | 0.886135  | 0.897197 | 1553.0  |
| SR           | 0.873484 | 0.882015  | 0.865213 | 907.0   |
| macro avg    | 0.858171 | 0.859408  | 0.857081 | 4026.0  |
| micro avg    | 0.864725 | 0.864725  | 0.864725 | 4026.0  |
| weighted avg | 0.864674 | 0.864759  | 0.864725 | 4026.0  |

The result of Model Number:Dataset Number:Featuregroup Number:Rescale of 31 : 0 : 6 :  
1

|              | f1-score | precision | recall   | support |
|--------------|----------|-----------|----------|---------|
| AFIB         | 0.787347 | 0.817942  | 0.759015 | 875.0   |
| GSVT         | 0.846423 | 0.840173  | 0.852880 | 691.0   |
| SB           | 0.930154 | 0.925362  | 0.935003 | 1553.0  |
| SR           | 0.875360 | 0.858667  | 0.892808 | 907.0   |
| macro avg    | 0.859821 | 0.860536  | 0.859926 | 4026.0  |
| micro avg    | 0.873153 | 0.873153  | 0.873153 | 4026.0  |
| weighted avg | 0.872401 | 0.872369  | 0.873153 | 4026.0  |

The result of Model Number:Dataset Number:Featuregroup Number:Rescale of 31 : 0 : 7 :  
0

|              | f1-score | precision | recall   | support |
|--------------|----------|-----------|----------|---------|
| AFIB         | 0.889920 | 0.888097  | 0.892395 | 875.0   |
| GSVT         | 0.902059 | 0.892590  | 0.911894 | 691.0   |
| SB           | 0.951369 | 0.938523  | 0.964758 | 1553.0  |
| SR           | 0.905076 | 0.939591  | 0.873212 | 907.0   |
| macro avg    | 0.912106 | 0.914700  | 0.910565 | 4026.0  |
| micro avg    | 0.919333 | 0.919333  | 0.919333 | 4026.0  |
| weighted avg | 0.919121 | 0.919921  | 0.919333 | 4026.0  |

The result of Model Number:Dataset Number:Featuregroup Number:Rescale of 31 : 0 : 7 :  
1

|              | f1-score | precision | recall   | support |
|--------------|----------|-----------|----------|---------|
| AFIB         | 0.845298 | 0.871427  | 0.821427 | 204.0   |
| GSVT         | 0.789075 | 0.806229  | 0.773218 | 300.0   |
| SB           | 0.832275 | 0.795337  | 0.872852 | 892.0   |
| SR           | 0.749372 | 0.787879  | 0.714559 | 681.0   |
| macro avg    | 0.804005 | 0.815218  | 0.795514 | 2077.0  |
| micro avg    | 0.801510 | 0.801510  | 0.801510 | 2077.0  |
| weighted avg | 0.800132 | 0.801938  | 0.801510 | 2077.0  |

The result of Model Number:Dataset Number:Featuregroup Number:Rescale of 31 : 0 : 8 :  
0

f1-score precision recall support  
AFIB 0.793110 0.781858 0.804710 875.0  
GSVT 0.809428 0.817317 0.801695 691.0  
SB 0.861389 0.858582 0.864216 1553.0  
SR 0.841273 0.852025 0.830798 907.0  
macro avg 0.826300 0.827445 0.825355 4026.0  
micro avg 0.833024 0.833024 0.833024 4026.0  
weighted avg 0.833099 0.833347 0.833024 4026.0  
The result of Model Number:Dataset Number:Featuregroup Number:Rescale of 31 : 0 : 8 :  
1

f1-score precision recall support  
AFIB 0.912306 0.921193 0.903812 204.0  
GSVT 0.933403 0.929117 0.937761 300.0  
SB 0.946302 0.943046 0.949587 892.0  
SR 0.938310 0.941951 0.934743 681.0  
macro avg 0.932581 0.933827 0.931476 2077.0  
micro avg 0.938516 0.938516 0.938516 2077.0  
weighted avg 0.938480 0.938529 0.938516 2077.0  
The result of Model Number:Dataset Number:Featuregroup Number:Rescale of 31 : 0 : 9 :  
0

f1-score precision recall support  
AFIB 0.863709 0.850800 0.877048 875.0  
GSVT 0.880269 0.887797 0.872881 691.0  
SB 0.940547 0.937309 0.943815 1553.0  
SR 0.913018 0.926636 0.899826 907.0  
macro avg 0.899386 0.900635 0.898393 4026.0  
micro avg 0.907219 0.907219 0.907219 4026.0  
weighted avg 0.907300 0.907605 0.907219 4026.0  
The result of Model Number:Dataset Number:Featuregroup Number:Rescale of 31 : 0 : 9 :  
1

f1-score precision recall support  
AFIB 0.675658 0.691719 0.660401 204.0  
GSVT 0.693199 0.690524 0.695967 300.0  
SB 0.710376 0.708791 0.711969 892.0  
SR 0.701439 0.700028 0.702881 681.0  
macro avg 0.695168 0.697765 0.692804 2077.0  
micro avg 0.701613 0.701613 0.701613 2077.0  
weighted avg 0.701555 0.701602 0.701613 2077.0  
The result of Model Number:Dataset Number:Featuregroup Number:Rescale of 31 : 0 :  
10 : 0

f1-score precision recall support  
AFIB 0.604777 0.607247 0.602346 875.0  
GSVT 0.563164 0.588019 0.540418 691.0  
SB 0.604805 0.547875 0.674947 1553.0

SR 0.456225 0.567815 0.381445 907.0  
macro avg 0.557243 0.577739 0.549789 4026.0  
micro avg 0.569956 0.569956 0.569956 4026.0  
weighted avg 0.564179 0.572161 0.569956 4026.0  
The result of Model Number:Dataset Number:Featuregroup Number:Rescale of 31 : 0 :  
10 : 1

f1-score precision recall support  
AFIB 0.717635 0.711887 0.723561 875.0  
GSVT 0.737454 0.738712 0.736286 691.0  
SB 0.781818 0.779722 0.783931 1553.0  
SR 0.760456 0.769309 0.751822 907.0  
macro avg 0.749341 0.749908 0.748900 4026.0  
micro avg 0.755399 0.755399 0.755399 4026.0  
weighted avg 0.755442 0.755594 0.755399 4026.0  
The result of Model Number:Dataset Number:Featuregroup Number:Rescale of 31 : 1 : 0 :  
0

f1-score precision recall support  
AFIB 0.783570 0.771556 0.796095 875.0  
GSVT 0.810589 0.818534 0.802956 691.0  
SB 0.862683 0.860668 0.864735 1553.0  
SR 0.841133 0.851798 0.830750 907.0  
macro avg 0.824494 0.825639 0.823634 4026.0  
micro avg 0.831557 0.831557 0.831557 4026.0  
weighted avg 0.831693 0.832070 0.831557 4026.0  
The result of Model Number:Dataset Number:Featuregroup Number:Rescale of 31 : 1 : 0 :  
1

f1-score precision recall support  
AFIB 0.680089 0.679911 0.680333 875.0  
GSVT 0.694296 0.691671 0.697016 691.0  
SB 0.739183 0.735846 0.742562 1553.0  
SR 0.714271 0.722432 0.706320 907.0  
macro avg 0.706960 0.707465 0.706558 4026.0  
micro avg 0.713055 0.713055 0.713055 4026.0  
weighted avg 0.713023 0.713085 0.713055 4026.0  
The result of Model Number:Dataset Number:Featuregroup Number:Rescale of 31 : 1 : 1 :  
0

f1-score precision recall support  
AFIB 0.795600 0.774700 0.845407 875.0  
GSVT 0.765360 0.724423 0.872494 691.0  
SB 0.725218 0.720635 0.729882 1553.0  
SR 0.704435 0.716572 0.692898 907.0  
macro avg 0.747653 0.734082 0.785170 4026.0  
micro avg 0.771135 0.771135 0.771135 4026.0  
weighted avg 0.742722 0.732120 0.771135 4026.0

The result of Model Number:Dataset Number:Featuregroup Number:Rescale of 31 : 1 : 1 : 1

|              | f1-score | precision | recall   | support |
|--------------|----------|-----------|----------|---------|
| AFIB         | 0.665971 | 0.657052  | 0.675178 | 875.0   |
| GSVT         | 0.680861 | 0.686175  | 0.675640 | 691.0   |
| SB           | 0.722885 | 0.720623  | 0.725164 | 1553.0  |
| SR           | 0.705403 | 0.714755  | 0.696306 | 907.0   |
| macro avg    | 0.693780 | 0.694651  | 0.693072 | 4026.0  |
| micro avg    | 0.699299 | 0.699299  | 0.699299 | 4026.0  |
| weighted avg | 0.699364 | 0.699572  | 0.699299 | 4026.0  |

The result of Model Number:Dataset Number:Featuregroup Number:Rescale of 31 : 1 : 2 : 0

|              | f1-score | precision | recall   | support |
|--------------|----------|-----------|----------|---------|
| AFIB         | 0.773335 | 0.777398  | 0.769361 | 875.0   |
| GSVT         | 0.786386 | 0.787845  | 0.785031 | 691.0   |
| SB           | 0.832890 | 0.826975  | 0.838895 | 1553.0  |
| SR           | 0.816921 | 0.821954  | 0.811968 | 907.0   |
| macro avg    | 0.802383 | 0.803543  | 0.801314 | 4026.0  |
| micro avg    | 0.808471 | 0.808471  | 0.808471 | 4026.0  |
| weighted avg | 0.808367 | 0.808353  | 0.808471 | 4026.0  |

The result of Model Number:Dataset Number:Featuregroup Number:Rescale of 31 : 1 : 2 : 1

|              | f1-score | precision | recall   | support |
|--------------|----------|-----------|----------|---------|
| AFIB         | 0.887331 | 0.888531  | 0.886303 | 875.0   |
| GSVT         | 0.901152 | 0.900688  | 0.901649 | 691.0   |
| SB           | 0.941160 | 0.937792  | 0.944554 | 1553.0  |
| SR           | 0.918622 | 0.923771  | 0.913589 | 907.0   |
| macro avg    | 0.912066 | 0.912696  | 0.911524 | 4026.0  |
| micro avg    | 0.917554 | 0.917554  | 0.917554 | 4026.0  |
| weighted avg | 0.917516 | 0.917559  | 0.917554 | 4026.0  |

The result of Model Number:Dataset Number:Featuregroup Number:Rescale of 31 : 1 : 3 : 0

|              | f1-score | precision | recall   | support |
|--------------|----------|-----------|----------|---------|
| AFIB         | 0.731160 | 0.725649  | 0.829857 | 204.0   |
| GSVT         | 0.886388 | 0.881140  | 0.891708 | 300.0   |
| SB           | 0.724942 | 0.723429  | 0.726465 | 892.0   |
| SR           | 0.896583 | 0.895148  | 0.898034 | 681.0   |
| macro avg    | 0.809768 | 0.806341  | 0.836516 | 2077.0  |
| micro avg    | 0.816741 | 0.816741  | 0.816741 | 2077.0  |
| weighted avg | 0.805149 | 0.802729  | 0.816741 | 2077.0  |

The result of Model Number:Dataset Number:Featuregroup Number:Rescale of 31 : 1 : 3 : 1

|      | f1-score | precision | recall   | support |
|------|----------|-----------|----------|---------|
| AFIB | 0.708221 | 0.714651  | 0.702269 | 204.0   |

GSVT 0.731628 0.727207 0.736296 300.0  
SB 0.746935 0.745934 0.747939 892.0  
SR 0.740024 0.741558 0.738501 681.0  
macro avg 0.731702 0.732337 0.731251 2077.0  
micro avg 0.738677 0.738677 0.738677 2077.0  
weighted avg 0.738656 0.738722 0.738677 2077.0  
The result of Model Number:Dataset Number:Featuregroup Number:Rescale of 31 : 1 : 4 :  
0

f1-score precision recall support  
AFIB 0.695214 0.700710 0.689827 875.0  
GSVT 0.712707 0.711201 0.714247 691.0  
SB 0.759767 0.753052 0.766613 1553.0  
SR 0.739541 0.746794 0.732445 907.0  
macro avg 0.726807 0.727939 0.725783 4026.0  
micro avg 0.733239 0.733239 0.733239 4026.0  
weighted avg 0.733104 0.733083 0.733239 4026.0  
The result of Model Number:Dataset Number:Featuregroup Number:Rescale of 31 : 1 : 4 :  
1

f1-score precision recall support  
AFIB 0.748061 0.733159 0.763620 875.0  
GSVT 0.608855 0.566203 0.763183 691.0  
SB 0.494019 0.494870 0.493171 1553.0  
SR 0.800868 0.807920 0.793971 907.0  
macro avg 0.662951 0.650538 0.703486 4026.0  
micro avg 0.666059 0.666059 0.666059 4026.0  
weighted avg 0.638070 0.629428 0.666059 4026.0  
The result of Model Number:Dataset Number:Featuregroup Number:Rescale of 31 : 1 : 5 :  
0

f1-score precision recall support  
AFIB 0.703498 0.689484 0.718130 875.0  
GSVT 0.572585 0.532474 0.717719 691.0  
SB 0.464590 0.465390 0.463792 1553.0  
SR 0.753159 0.759791 0.746674 907.0  
macro avg 0.623458 0.611785 0.661579 4026.0  
micro avg 0.626381 0.626381 0.626381 4026.0  
weighted avg 0.600060 0.591932 0.626381 4026.0  
The result of Model Number:Dataset Number:Featuregroup Number:Rescale of 31 : 1 : 5 :  
1

f1-score precision recall support  
AFIB 0.627408 0.693032 0.573320 204.0  
GSVT 0.738102 0.728356 0.748191 300.0  
SB 0.782754 0.779712 0.785825 892.0  
SR 0.763945 0.753057 0.775160 681.0  
macro avg 0.728052 0.738540 0.720624 2077.0

micro avg 0.756020 0.756020 0.756020 2077.0  
weighted avg 0.754880 0.755041 0.756020 2077.0  
The result of Model Number:Dataset Number:Featuregroup Number:Rescale of 31 : 1 : 6 :  
0

|              | f1-score | precision | recall   | support |
|--------------|----------|-----------|----------|---------|
| AFIB         | 0.895287 | 0.914067  | 0.877289 | 204.0   |
| GSVT         | 0.916056 | 0.910636  | 0.921551 | 300.0   |
| SB           | 0.938389 | 0.936191  | 0.940598 | 892.0   |
| SR           | 0.930463 | 0.930195  | 0.930739 | 681.0   |
| macro avg    | 0.920049 | 0.922772  | 0.917544 | 2077.0  |
| micro avg    | 0.928396 | 0.928396  | 0.928396 | 2077.0  |
| weighted avg | 0.928331 | 0.928361  | 0.928396 | 2077.0  |

The result of Model Number:Dataset Number:Featuregroup Number:Rescale of 31 : 1 : 6 :  
1

|              | f1-score | precision | recall   | support |
|--------------|----------|-----------|----------|---------|
| AFIB         | 0.787563 | 0.788974  | 0.786183 | 875.0   |
| GSVT         | 0.754145 | 0.758106  | 0.750245 | 691.0   |
| SB           | 0.797702 | 0.753821  | 0.847015 | 1553.0  |
| SR           | 0.662495 | 0.745687  | 0.596061 | 907.0   |
| macro avg    | 0.750476 | 0.761647  | 0.744876 | 4026.0  |
| micro avg    | 0.760649 | 0.760649  | 0.760649 | 4026.0  |
| weighted avg | 0.757562 | 0.760364  | 0.760649 | 4026.0  |

The result of Model Number:Dataset Number:Featuregroup Number:Rescale of 31 : 1 : 7 :  
0

|              | f1-score | precision | recall   | support |
|--------------|----------|-----------|----------|---------|
| AFIB         | 0.907076 | 0.908932  | 0.905326 | 204.0   |
| GSVT         | 0.927027 | 0.923423  | 0.930723 | 300.0   |
| SB           | 0.947606 | 0.946342  | 0.948879 | 892.0   |
| SR           | 0.940646 | 0.943427  | 0.937884 | 681.0   |
| macro avg    | 0.930589 | 0.930531  | 0.930703 | 2077.0  |
| micro avg    | 0.938374 | 0.938374  | 0.938374 | 2077.0  |
| weighted avg | 0.938371 | 0.938401  | 0.938374 | 2077.0  |

The result of Model Number:Dataset Number:Featuregroup Number:Rescale of 31 : 1 : 7 :  
1

|              | f1-score | precision | recall   | support |
|--------------|----------|-----------|----------|---------|
| AFIB         | 0.723322 | 0.738345  | 0.709065 | 875.0   |
| GSVT         | 0.705383 | 0.680884  | 0.762963 | 691.0   |
| SB           | 0.831404 | 0.827655  | 0.835201 | 1553.0  |
| SR           | 0.632073 | 0.621868  | 0.642675 | 907.0   |
| macro avg    | 0.723046 | 0.717188  | 0.737476 | 4026.0  |
| micro avg    | 0.752015 | 0.752015  | 0.752015 | 4026.0  |
| weighted avg | 0.741378 | 0.736693  | 0.752015 | 4026.0  |

The result of Model Number:Dataset Number:Featuregroup Number:Rescale of 31 : 1 : 8 :  
0

f1-score precision recall support  
AFIB 0.781239 0.808360 0.755984 204.0  
GSVT 0.796219 0.787502 0.805228 300.0  
SB 0.817415 0.811545 0.823371 892.0  
SR 0.802816 0.806764 0.798921 681.0  
macro avg 0.799422 0.803543 0.795876 2077.0  
micro avg 0.806115 0.806115 0.806115 2077.0  
weighted avg 0.806014 0.806192 0.806115 2077.0  
The result of Model Number:Dataset Number:Featuregroup Number:Rescale of 31 : 1 : 8 :  
1

f1-score precision recall support  
AFIB 0.671150 0.680395 0.662448 875.0  
GSVT 0.685802 0.682962 0.688851 691.0  
SB 0.730486 0.720908 0.740352 1553.0  
SR 0.707552 0.718118 0.697606 907.0  
macro avg 0.698747 0.700596 0.697314 4026.0  
micro avg 0.704951 0.704951 0.704951 4026.0  
weighted avg 0.704754 0.704962 0.704951 4026.0  
The result of Model Number:Dataset Number:Featuregroup Number:Rescale of 31 : 1 : 9 :  
0

f1-score precision recall support  
AFIB 0.888239 0.895648 0.881258 204.0  
GSVT 0.911704 0.907506 0.915961 300.0  
SB 0.925453 0.922166 0.928770 892.0  
SR 0.916906 0.921012 0.912883 681.0  
macro avg 0.910576 0.911583 0.909718 2077.0  
micro avg 0.917044 0.917044 0.917044 2077.0  
weighted avg 0.917010 0.917065 0.917044 2077.0  
The result of Model Number:Dataset Number:Featuregroup Number:Rescale of 31 : 1 : 9 :  
1

f1-score precision recall support  
AFIB 0.773125 0.772417 0.773927 875.0  
GSVT 0.788972 0.787441 0.790591 691.0  
SB 0.837202 0.835337 0.839088 1553.0  
SR 0.814351 0.819664 0.809137 907.0  
macro avg 0.803412 0.803715 0.803186 4026.0  
micro avg 0.809855 0.809855 0.809855 4026.0  
weighted avg 0.809850 0.809911 0.809855 4026.0  
The result of Model Number:Dataset Number:Featuregroup Number:Rescale of 31 : 1 :  
10 : 0

f1-score precision recall support  
AFIB 0.816759 0.812646 0.820949 875.0  
GSVT 0.832668 0.836699 0.828689 691.0  
SB 0.886842 0.884801 0.888895 1553.0



SR 0.864641 0.869267 0.860073 907.0  
macro avg 0.850227 0.850853 0.849651 4026.0  
micro avg 0.857301 0.857301 0.857301 4026.0  
weighted avg 0.857310 0.857363 0.857301 4026.0  
The result of Model Number:Dataset Number:Featuregroup Number:Rescale of 31 : 1 :  
10 : 1

f1-score precision recall support  
AFIB 0.741308 0.752675 0.730402 204.0  
GSVT 0.758886 0.752447 0.765467 300.0  
SB 0.772087 0.769595 0.774597 892.0  
SR 0.764153 0.766989 0.761347 681.0  
macro avg 0.759108 0.760426 0.757953 2077.0  
micro avg 0.764593 0.764593 0.764593 2077.0  
weighted avg 0.764556 0.764602 0.764593 2077.0

The result of Model Number:Dataset Number:Featuregroup Number:Rescale of 32 : 0 : 0 :  
0

f1-score precision recall support  
AFIB 0.781745 0.785467 0.778092 875.0  
GSVT 0.791402 0.777020 0.806408 691.0  
SB 0.837363 0.834157 0.840597 1553.0  
SR 0.812613 0.826522 0.799177 907.0  
macro avg 0.805781 0.805791 0.806068 4026.0  
micro avg 0.811813 0.811813 0.811813 4026.0  
weighted avg 0.811811 0.812048 0.811813 4026.0

The result of Model Number:Dataset Number:Featuregroup Number:Rescale of 32 : 0 : 0 :  
1

f1-score precision recall support  
AFIB 0.911720 0.918101 0.905460 204.0  
GSVT 0.932932 0.928333 0.937592 300.0  
SB 0.951475 0.949891 0.953075 892.0  
SR 0.942005 0.944241 0.939790 681.0  
macro avg 0.934533 0.935141 0.933979 2077.0  
micro avg 0.941806 0.941806 0.941806 2077.0  
weighted avg 0.941787 0.941802 0.941806 2077.0

The result of Model Number:Dataset Number:Featuregroup Number:Rescale of 32 : 0 : 1 :  
0

f1-score precision recall support  
AFIB 0.794165 0.783952 0.804705 875.0  
GSVT 0.810332 0.817040 0.803765 691.0  
SB 0.866407 0.862551 0.870308 1553.0  
SR 0.841751 0.854201 0.829680 907.0  
macro avg 0.828164 0.829436 0.827115 4026.0  
micro avg 0.835476 0.835476 0.835476 4026.0  
weighted avg 0.835527 0.835776 0.835476 4026.0

The result of Model Number:Dataset Number:Featuregroup Number:Rescale of 32 : 0 : 1 : 1

|              | f1-score | precision | recall   | support |
|--------------|----------|-----------|----------|---------|
| AFIB         | 0.633325 | 0.680935  | 0.592599 | 204.0   |
| GSVT         | 0.603983 | 0.623155  | 0.586048 | 300.0   |
| SB           | 0.629265 | 0.598127  | 0.663829 | 892.0   |
| SR           | 0.557041 | 0.580984  | 0.535050 | 681.0   |
| macro avg    | 0.605904 | 0.620800  | 0.594381 | 2077.0  |
| micro avg    | 0.603375 | 0.603375  | 0.603375 | 2077.0  |
| weighted avg | 0.602331 | 0.604254  | 0.603375 | 2077.0  |

The result of Model Number:Dataset Number:Featuregroup Number:Rescale of 32 : 0 : 2 : 0

|              | f1-score | precision | recall   | support |
|--------------|----------|-----------|----------|---------|
| AFIB         | 0.727472 | 0.801357  | 0.666759 | 204.0   |
| GSVT         | 0.671816 | 0.718273  | 0.631318 | 300.0   |
| SB           | 0.731409 | 0.683409  | 0.786671 | 892.0   |
| SR           | 0.633046 | 0.666322  | 0.603109 | 681.0   |
| macro avg    | 0.690936 | 0.717340  | 0.671964 | 2077.0  |
| micro avg    | 0.692269 | 0.692269  | 0.692269 | 2077.0  |
| weighted avg | 0.690164 | 0.694427  | 0.692269 | 2077.0  |

The result of Model Number:Dataset Number:Featuregroup Number:Rescale of 32 : 0 : 2 : 1

|              | f1-score | precision | recall   | support |
|--------------|----------|-----------|----------|---------|
| AFIB         | 0.829786 | 0.829934  | 0.829674 | 875.0   |
| GSVT         | 0.838565 | 0.841398  | 0.835804 | 691.0   |
| SB           | 0.880870 | 0.877832  | 0.883932 | 1553.0  |
| SR           | 0.864143 | 0.867057  | 0.861279 | 907.0   |
| macro avg    | 0.853341 | 0.854056  | 0.852673 | 4026.0  |
| micro avg    | 0.858776 | 0.858776  | 0.858776 | 4026.0  |
| weighted avg | 0.858738 | 0.858742  | 0.858776 | 4026.0  |

The result of Model Number:Dataset Number:Featuregroup Number:Rescale of 32 : 0 : 3 : 0

|              | f1-score | precision | recall   | support |
|--------------|----------|-----------|----------|---------|
| AFIB         | 0.890681 | 0.906707  | 0.875475 | 204.0   |
| GSVT         | 0.910774 | 0.897969  | 0.924102 | 300.0   |
| SB           | 0.924788 | 0.913862  | 0.935984 | 892.0   |
| SR           | 0.906189 | 0.922323  | 0.890620 | 681.0   |
| macro avg    | 0.908108 | 0.910215  | 0.906545 | 2077.0  |
| micro avg    | 0.913451 | 0.913451  | 0.913451 | 2077.0  |
| weighted avg | 0.913316 | 0.913638  | 0.913451 | 2077.0  |

The result of Model Number:Dataset Number:Featuregroup Number:Rescale of 32 : 0 : 3 : 1

|      | f1-score | precision | recall   | support |
|------|----------|-----------|----------|---------|
| AFIB | 0.806227 | 0.800223  | 0.812404 | 875.0   |

GSVT 0.821264 0.824196 0.818401 691.0  
SB 0.871462 0.869397 0.873537 1553.0  
SR 0.851574 0.859241 0.844074 907.0  
macro avg 0.837632 0.838264 0.837104 4026.0  
micro avg 0.844150 0.844150 0.844150 4026.0  
weighted avg 0.844188 0.844317 0.844150 4026.0  
The result of Model Number:Dataset Number:Featuregroup Number:Rescale of 32 : 0 : 4 :  
0

f1-score precision recall support  
AFIB 0.883634 0.919299 0.850703 204.0  
GSVT 0.916517 0.901629 0.932063 300.0  
SB 0.940228 0.932668 0.947922 892.0  
SR 0.914932 0.921520 0.908485 681.0  
macro avg 0.913828 0.918779 0.909793 2077.0  
micro avg 0.923152 0.923152 0.923152 2077.0  
weighted avg 0.922950 0.923217 0.923152 2077.0  
The result of Model Number:Dataset Number:Featuregroup Number:Rescale of 32 : 0 : 4 :  
1

f1-score precision recall support  
AFIB 0.663218 0.678215 0.648889 875.0  
GSVT 0.703162 0.706154 0.700236 691.0  
SB 0.763488 0.759890 0.767125 1553.0  
SR 0.723394 0.712298 0.734872 907.0  
macro avg 0.713315 0.714139 0.712780 4026.0  
micro avg 0.722681 0.722681 0.722681 4026.0  
weighted avg 0.722309 0.722194 0.722681 4026.0  
The result of Model Number:Dataset Number:Featuregroup Number:Rescale of 32 : 0 : 5 :  
0

f1-score precision recall support  
AFIB 0.893479 0.906659 0.880774 204.0  
GSVT 0.915413 0.911820 0.919064 300.0  
SB 0.935744 0.933867 0.937631 892.0  
SR 0.929106 0.929246 0.928975 681.0  
macro avg 0.918435 0.920398 0.916611 2077.0  
micro avg 0.926527 0.926527 0.926527 2077.0  
weighted avg 0.926480 0.926495 0.926527 2077.0  
The result of Model Number:Dataset Number:Featuregroup Number:Rescale of 32 : 0 : 5 :  
1

f1-score precision recall support  
AFIB 0.902806 0.919561 0.886875 204.0  
GSVT 0.922658 0.917820 0.927566 300.0  
SB 0.937388 0.934056 0.940749 892.0  
SR 0.927738 0.929410 0.926112 681.0  
macro avg 0.922647 0.925212 0.920326 2077.0

micro avg 0.928754 0.928754 0.928754 2077.0  
weighted avg 0.928700 0.928764 0.928754 2077.0  
The result of Model Number:Dataset Number:Featuregroup Number:Rescale of 32 : 0 : 6 :  
0

|              | f1-score | precision | recall   | support |
|--------------|----------|-----------|----------|---------|
| AFIB         | 0.764886 | 0.754261  | 0.775887 | 875.0   |
| GSVT         | 0.792219 | 0.802788  | 0.782028 | 691.0   |
| SB           | 0.841594 | 0.839870  | 0.843328 | 1553.0  |
| SR           | 0.819690 | 0.826023  | 0.813453 | 907.0   |
| macro avg    | 0.804597 | 0.805735  | 0.803674 | 4026.0  |
| micro avg    | 0.811419 | 0.811419  | 0.811419 | 4026.0  |
| weighted avg | 0.811513 | 0.811780  | 0.811419 | 4026.0  |

The result of Model Number:Dataset Number:Featuregroup Number:Rescale of 32 : 0 : 6 :  
1

|              | f1-score | precision | recall   | support |
|--------------|----------|-----------|----------|---------|
| AFIB         | 0.761823 | 0.755012  | 0.768792 | 875.0   |
| GSVT         | 0.774055 | 0.777117  | 0.771044 | 691.0   |
| SB           | 0.825308 | 0.823776  | 0.826849 | 1553.0  |
| SR           | 0.804395 | 0.811831  | 0.797123 | 907.0   |
| macro avg    | 0.791395 | 0.791934  | 0.790952 | 4026.0  |
| micro avg    | 0.797956 | 0.797956  | 0.797956 | 4026.0  |
| weighted avg | 0.798002 | 0.798132  | 0.797956 | 4026.0  |

The result of Model Number:Dataset Number:Featuregroup Number:Rescale of 32 : 0 : 7 :  
0

|              | f1-score | precision | recall   | support |
|--------------|----------|-----------|----------|---------|
| AFIB         | 0.789612 | 0.808560  | 0.771891 | 204.0   |
| GSVT         | 0.817688 | 0.812949  | 0.822582 | 300.0   |
| SB           | 0.835151 | 0.832088  | 0.838240 | 892.0   |
| SR           | 0.827894 | 0.828508  | 0.827290 | 681.0   |
| macro avg    | 0.817586 | 0.820526  | 0.815001 | 2077.0  |
| micro avg    | 0.825871 | 0.825871  | 0.825871 | 2077.0  |
| weighted avg | 0.825777 | 0.825839  | 0.825871 | 2077.0  |

The result of Model Number:Dataset Number:Featuregroup Number:Rescale of 32 : 0 : 7 :  
1

|              | f1-score | precision | recall   | support |
|--------------|----------|-----------|----------|---------|
| AFIB         | 0.724574 | 0.705540  | 0.769934 | 875.0   |
| GSVT         | 0.697034 | 0.659751  | 0.794604 | 691.0   |
| SB           | 0.660475 | 0.656301  | 0.664723 | 1553.0  |
| SR           | 0.641547 | 0.652601  | 0.631041 | 907.0   |
| macro avg    | 0.680908 | 0.668548  | 0.715075 | 4026.0  |
| micro avg    | 0.702293 | 0.702293  | 0.702293 | 4026.0  |
| weighted avg | 0.676417 | 0.666761  | 0.702293 | 4026.0  |

The result of Model Number:Dataset Number:Featuregroup Number:Rescale of 32 : 0 : 8 :  
0

f1-score precision recall support  
AFIB 0.575249 0.566039 0.647272 204.0  
GSVT 0.673465 0.665650 0.681710 300.0  
SB 0.696015 0.693386 0.698667 892.0  
SR 0.546106 0.548929 0.543404 681.0  
macro avg 0.622709 0.618501 0.642763 2077.0  
micro avg 0.640263 0.640263 0.640263 2077.0  
weighted avg 0.631745 0.629508 0.640263 2077.0  
The result of Model Number:Dataset Number:Featuregroup Number:Rescale of 32 : 0 : 8 :  
1

f1-score precision recall support  
AFIB 0.892129 0.888650 0.895699 875.0  
GSVT 0.908826 0.910742 0.906971 691.0  
SB 0.964749 0.962344 0.967171 1553.0  
SR 0.942494 0.948824 0.936267 907.0  
macro avg 0.927050 0.927640 0.926527 4026.0  
micro avg 0.934343 0.934343 0.934343 4026.0  
weighted avg 0.934354 0.934425 0.934343 4026.0  
The result of Model Number:Dataset Number:Featuregroup Number:Rescale of 32 : 0 : 9 :  
0

f1-score precision recall support  
AFIB 0.656295 0.672662 0.640754 875.0  
GSVT 0.698183 0.700859 0.695559 691.0  
SB 0.756073 0.752413 0.759772 1553.0  
SR 0.716421 0.704480 0.728821 907.0  
macro avg 0.706743 0.707604 0.706227 4026.0  
micro avg 0.715911 0.715911 0.715911 4026.0  
weighted avg 0.715519 0.715433 0.715911 4026.0  
The result of Model Number:Dataset Number:Featuregroup Number:Rescale of 32 : 0 : 9 :  
1

f1-score precision recall support  
AFIB 0.927988 0.934928 0.921187 204.0  
GSVT 0.951700 0.946677 0.956777 300.0  
SB 0.967761 0.966467 0.969062 892.0  
SR 0.959237 0.961077 0.957408 681.0  
macro avg 0.951672 0.952287 0.951108 2077.0  
micro avg 0.958764 0.958764 0.958764 2077.0  
weighted avg 0.958740 0.958743 0.958764 2077.0  
The result of Model Number:Dataset Number:Featuregroup Number:Rescale of 32 : 0 :  
10 : 0

f1-score precision recall support  
AFIB 0.765148 0.755379 0.775218 875.0  
GSVT 0.778578 0.783043 0.774185 691.0  
SB 0.833420 0.829920 0.836958 1553.0

SR 0.808881 0.821973 0.796213 907.0  
macro avg 0.796507 0.797579 0.795643 4026.0  
micro avg 0.803586 0.803586 0.803586 4026.0  
weighted avg 0.803641 0.803884 0.803586 4026.0  
The result of Model Number:Dataset Number:Featuregroup Number:Rescale of 32 : 0 :  
10 : 1

f1-score precision recall support  
AFIB 0.840559 0.847345 0.833953 204.0  
GSVT 0.859846 0.855630 0.864134 300.0  
SB 0.876627 0.875655 0.877610 892.0  
SR 0.870082 0.871239 0.868934 681.0  
macro avg 0.861778 0.862467 0.861157 2077.0  
micro avg 0.868531 0.868531 0.868531 2077.0  
weighted avg 0.868515 0.868534 0.868531 2077.0  
The result of Model Number:Dataset Number:Featuregroup Number:Rescale of 32 : 1 : 0 :  
0

f1-score precision recall support  
AFIB 0.709420 0.725478 0.694149 204.0  
GSVT 0.728299 0.724733 0.731932 300.0  
SB 0.743198 0.741052 0.745362 892.0  
SR 0.738423 0.738104 0.738754 681.0  
macro avg 0.729835 0.732342 0.727549 2077.0  
micro avg 0.736226 0.736226 0.736226 2077.0  
weighted avg 0.736163 0.736199 0.736226 2077.0  
The result of Model Number:Dataset Number:Featuregroup Number:Rescale of 32 : 1 : 0 :  
1

f1-score precision recall support  
AFIB 0.608156 0.609177 0.623229 204.0  
GSVT 0.602439 0.625817 0.581521 300.0  
SB 0.639017 0.603973 0.678641 892.0  
SR 0.553892 0.605008 0.512142 681.0  
macro avg 0.600876 0.610994 0.598883 2077.0  
micro avg 0.604579 0.604579 0.604579 2077.0  
weighted avg 0.602792 0.607979 0.604579 2077.0  
The result of Model Number:Dataset Number:Featuregroup Number:Rescale of 32 : 1 : 1 :  
0

f1-score precision recall support  
AFIB 0.723058 0.713758 0.732654 875.0  
GSVT 0.737776 0.743884 0.731798 691.0  
SB 0.788831 0.785320 0.792383 1553.0  
SR 0.766383 0.777718 0.755392 907.0  
macro avg 0.754012 0.755170 0.753057 4026.0  
micro avg 0.760670 0.760670 0.760670 4026.0  
weighted avg 0.760716 0.760943 0.760670 4026.0

The result of Model Number:Dataset Number:Featuregroup Number:Rescale of 32 : 1 : 1 : 1

|              | f1-score | precision | recall   | support |
|--------------|----------|-----------|----------|---------|
| AFIB         | 0.710170 | 0.721702  | 0.699038 | 875.0   |
| GSVT         | 0.755286 | 0.757653  | 0.752980 | 691.0   |
| SB           | 0.821713 | 0.818882  | 0.824569 | 1553.0  |
| SR           | 0.777923 | 0.769258  | 0.786832 | 907.0   |
| macro avg    | 0.766273 | 0.766874  | 0.765855 | 4026.0  |
| micro avg    | 0.776498 | 0.776498  | 0.776498 | 4026.0  |
| weighted avg | 0.776204 | 0.776073  | 0.776498 | 4026.0  |

The result of Model Number:Dataset Number:Featuregroup Number:Rescale of 32 : 1 : 2 : 0

|              | f1-score | precision | recall   | support |
|--------------|----------|-----------|----------|---------|
| AFIB         | 0.842268 | 0.848162  | 0.836485 | 204.0   |
| GSVT         | 0.861864 | 0.857615  | 0.866168 | 300.0   |
| SB           | 0.878994 | 0.877531  | 0.880472 | 892.0   |
| SR           | 0.870245 | 0.872311  | 0.868200 | 681.0   |
| macro avg    | 0.863343 | 0.863905  | 0.862831 | 2077.0  |
| micro avg    | 0.870062 | 0.870062  | 0.870062 | 2077.0  |
| weighted avg | 0.870044 | 0.870058  | 0.870062 | 2077.0  |

The result of Model Number:Dataset Number:Featuregroup Number:Rescale of 32 : 1 : 2 : 1

|              | f1-score | precision | recall   | support |
|--------------|----------|-----------|----------|---------|
| AFIB         | 0.792601 | 0.824592  | 0.763063 | 204.0   |
| GSVT         | 0.822097 | 0.808742  | 0.836041 | 300.0   |
| SB           | 0.843365 | 0.836584  | 0.850266 | 892.0   |
| SR           | 0.820675 | 0.826585  | 0.814892 | 681.0   |
| macro avg    | 0.819684 | 0.824126  | 0.816066 | 2077.0  |
| micro avg    | 0.828048 | 0.828048  | 0.828048 | 2077.0  |
| weighted avg | 0.827867 | 0.828106  | 0.828048 | 2077.0  |

The result of Model Number:Dataset Number:Featuregroup Number:Rescale of 32 : 1 : 3 : 0

|              | f1-score | precision | recall   | support |
|--------------|----------|-----------|----------|---------|
| AFIB         | 0.870519 | 0.877419  | 0.863748 | 875.0   |
| GSVT         | 0.881555 | 0.877669  | 0.885506 | 691.0   |
| SB           | 0.937430 | 0.933724  | 0.941172 | 1553.0  |
| SR           | 0.914394 | 0.916978  | 0.911869 | 907.0   |
| macro avg    | 0.900974 | 0.901447  | 0.900574 | 4026.0  |
| micro avg    | 0.908189 | 0.908189  | 0.908189 | 4026.0  |
| weighted avg | 0.908108 | 0.908093  | 0.908189 | 4026.0  |

The result of Model Number:Dataset Number:Featuregroup Number:Rescale of 32 : 1 : 3 : 1

|      | f1-score | precision | recall   | support |
|------|----------|-----------|----------|---------|
| AFIB | 0.731472 | 0.737530  | 0.823903 | 204.0   |

GSVT 0.793232 0.759281 0.894951 300.0  
SB 0.724250 0.721734 0.726787 892.0  
SR 0.717049 0.717185 0.716918 681.0  
macro avg 0.741501 0.733932 0.790640 2077.0  
micro avg 0.757379 0.757379 0.757379 2077.0  
weighted avg 0.732562 0.727217 0.757379 2077.0  
The result of Model Number:Dataset Number:Featuregroup Number:Rescale of 32 : 1 : 4 :  
0

f1-score precision recall support  
AFIB 0.837984 0.907939 0.779709 204.0  
GSVT 0.898835 0.887533 0.910795 300.0  
SB 0.921781 0.908868 0.935175 892.0  
SR 0.896637 0.900837 0.892912 681.0  
macro avg 0.888810 0.901294 0.879648 2077.0  
micro avg 0.902527 0.902527 0.902527 2077.0  
weighted avg 0.901992 0.903062 0.902527 2077.0  
The result of Model Number:Dataset Number:Featuregroup Number:Rescale of 32 : 1 : 4 :  
1

f1-score precision recall support  
AFIB 0.894399 0.898469 0.890420 875.0  
GSVT 0.898745 0.889787 0.907962 691.0  
SB 0.947279 0.936957 0.957832 1553.0  
SR 0.905970 0.927418 0.885495 907.0  
macro avg 0.911598 0.913158 0.910427 4026.0  
micro avg 0.918325 0.918325 0.918325 4026.0  
weighted avg 0.918150 0.918347 0.918325 4026.0  
The result of Model Number:Dataset Number:Featuregroup Number:Rescale of 32 : 1 : 5 :  
0

f1-score precision recall support  
AFIB 0.830443 0.829107 0.832122 875.0  
GSVT 0.849805 0.845375 0.854331 691.0  
SB 0.888515 0.880988 0.896180 1553.0  
SR 0.854597 0.873596 0.836695 907.0  
macro avg 0.855840 0.857266 0.854832 4026.0  
micro avg 0.861674 0.861674 0.861674 4026.0  
weighted avg 0.861609 0.861935 0.861674 4026.0  
The result of Model Number:Dataset Number:Featuregroup Number:Rescale of 32 : 1 : 5 :  
1

f1-score precision recall support  
AFIB 0.719371 0.735764 0.703807 875.0  
GSVT 0.765503 0.767016 0.764252 691.0  
SB 0.837511 0.832927 0.842149 1553.0  
SR 0.791574 0.781972 0.801525 907.0  
macro avg 0.778490 0.779420 0.777933 4026.0



micro avg 0.789560 0.789560 0.789560 4026.0  
weighted avg 0.789127 0.789018 0.789560 4026.0  
The result of Model Number:Dataset Number:Featuregroup Number:Rescale of 32 : 1 : 6 :  
0

|              | f1-score | precision | recall   | support |
|--------------|----------|-----------|----------|---------|
| AFIB         | 0.641212 | 0.643277  | 0.639219 | 875.0   |
| GSVT         | 0.650226 | 0.639903  | 0.660947 | 691.0   |
| SB           | 0.685119 | 0.679399  | 0.690942 | 1553.0  |
| SR           | 0.650680 | 0.667206  | 0.634977 | 907.0   |
| macro avg    | 0.656809 | 0.657446  | 0.656521 | 4026.0  |
| micro avg    | 0.661944 | 0.661944  | 0.661944 | 4026.0  |
| weighted avg | 0.661829 | 0.662022  | 0.661944 | 4026.0  |

The result of Model Number:Dataset Number:Featuregroup Number:Rescale of 32 : 1 : 6 :  
1

|              | f1-score | precision | recall   | support |
|--------------|----------|-----------|----------|---------|
| AFIB         | 0.872855 | 0.877441  | 0.868370 | 875.0   |
| GSVT         | 0.887585 | 0.889233  | 0.886056 | 691.0   |
| SB           | 0.940074 | 0.933398  | 0.946852 | 1553.0  |
| SR           | 0.922050 | 0.927731  | 0.916460 | 907.0   |
| macro avg    | 0.905641 | 0.906951  | 0.904434 | 4026.0  |
| micro avg    | 0.912513 | 0.912513  | 0.912513 | 4026.0  |
| weighted avg | 0.912395 | 0.912380  | 0.912513 | 4026.0  |

The result of Model Number:Dataset Number:Featuregroup Number:Rescale of 32 : 1 : 7 :  
0

|              | f1-score | precision | recall   | support |
|--------------|----------|-----------|----------|---------|
| AFIB         | 0.873716 | 0.876666  | 0.870817 | 875.0   |
| GSVT         | 0.871409 | 0.865271  | 0.877713 | 691.0   |
| SB           | 0.916882 | 0.908372  | 0.925559 | 1553.0  |
| SR           | 0.882024 | 0.899022  | 0.865701 | 907.0   |
| macro avg    | 0.886008 | 0.887333  | 0.884947 | 4026.0  |
| micro avg    | 0.891964 | 0.891964  | 0.891964 | 4026.0  |
| weighted avg | 0.891843 | 0.891977  | 0.891964 | 4026.0  |

The result of Model Number:Dataset Number:Featuregroup Number:Rescale of 32 : 1 : 7 :  
1

|              | f1-score | precision | recall   | support |
|--------------|----------|-----------|----------|---------|
| AFIB         | 0.591679 | 0.648628  | 0.544124 | 204.0   |
| GSVT         | 0.688124 | 0.681054  | 0.695472 | 300.0   |
| SB           | 0.729464 | 0.726627  | 0.732326 | 892.0   |
| SR           | 0.712563 | 0.702710  | 0.722709 | 681.0   |
| macro avg    | 0.680458 | 0.689754  | 0.673658 | 2077.0  |
| micro avg    | 0.705365 | 0.705365  | 0.705365 | 2077.0  |
| weighted avg | 0.704418 | 0.704541  | 0.705365 | 2077.0  |

The result of Model Number:Dataset Number:Featuregroup Number:Rescale of 32 : 1 : 8 :  
0

f1-score precision recall support  
AFIB 0.831939 0.820136 0.844107 875.0  
GSVT 0.849055 0.857330 0.840944 691.0  
SB 0.903560 0.900616 0.906526 1553.0  
SR 0.882459 0.893738 0.871471 907.0  
macro avg 0.866753 0.867955 0.865762 4026.0  
micro avg 0.873807 0.873807 0.873807 4026.0  
weighted avg 0.873885 0.874146 0.873807 4026.0  
The result of Model Number:Dataset Number:Featuregroup Number:Rescale of 32 : 1 : 8 :  
1

f1-score precision recall support  
AFIB 0.867795 0.878563 0.857580 204.0  
GSVT 0.883356 0.877320 0.889567 300.0  
SB 0.904274 0.902862 0.905692 892.0  
SR 0.897778 0.899235 0.896335 681.0  
macro avg 0.888301 0.889495 0.887294 2077.0  
micro avg 0.895570 0.895570 0.895570 2077.0  
weighted avg 0.895540 0.895597 0.895570 2077.0  
The result of Model Number:Dataset Number:Featuregroup Number:Rescale of 32 : 1 : 9 :  
0

f1-score precision recall support  
AFIB 0.809537 0.798790 0.820640 875.0  
GSVT 0.825968 0.833798 0.818319 691.0  
SB 0.878948 0.876869 0.881041 1553.0  
SR 0.855104 0.864095 0.846333 907.0  
macro avg 0.842389 0.843388 0.841583 4026.0  
micro avg 0.849329 0.849329 0.849329 4026.0  
weighted avg 0.849397 0.849629 0.849329 4026.0  
The result of Model Number:Dataset Number:Featuregroup Number:Rescale of 32 : 1 : 9 :  
1

f1-score precision recall support  
AFIB 0.773922 0.785172 0.763341 204.0  
GSVT 0.790990 0.780289 0.802053 300.0  
SB 0.802895 0.794528 0.811447 892.0  
SR 0.786982 0.800004 0.774390 681.0  
macro avg 0.788697 0.789998 0.787807 2077.0  
micro avg 0.793215 0.793215 0.793215 2077.0  
weighted avg 0.793112 0.793348 0.793215 2077.0  
The result of Model Number:Dataset Number:Featuregroup Number:Rescale of 32 : 1 :  
10 : 0

f1-score precision recall support  
AFIB 0.618692 0.695664 0.557601 204.0  
GSVT 0.734033 0.718358 0.750439 300.0  
SB 0.783593 0.779599 0.787633 892.0

SR 0.766014 0.756314 0.776016 681.0  
macro avg 0.725583 0.737484 0.717922 2077.0  
micro avg 0.755858 0.755858 0.755858 2077.0  
weighted avg 0.754475 0.754875 0.755858 2077.0  
The result of Model Number:Dataset Number:Featuregroup Number:Rescale of 32 : 1 :  
10 : 1

f1-score precision recall support  
AFIB 0.662914 0.662174 0.663676 875.0  
GSVT 0.675040 0.666597 0.683719 691.0  
SB 0.709126 0.703425 0.714926 1553.0  
SR 0.677488 0.695264 0.660610 907.0  
macro avg 0.681142 0.681865 0.680733 4026.0  
micro avg 0.686195 0.686195 0.686195 4026.0  
weighted avg 0.686105 0.686300 0.686195 4026.0

The result of Model Number:Dataset Number:Featuregroup Number:Rescale of 33 : 0 : 0 :  
0

f1-score precision recall support  
AFIB 0.777782 0.783225 0.772442 204.0  
GSVT 0.795878 0.791954 0.799853 300.0  
SB 0.811696 0.810345 0.813061 892.0  
SR 0.803618 0.805526 0.801729 681.0  
macro avg 0.797243 0.797763 0.796771 2077.0  
micro avg 0.803448 0.803448 0.803448 2077.0  
weighted avg 0.803432 0.803445 0.803448 2077.0

The result of Model Number:Dataset Number:Featuregroup Number:Rescale of 33 : 0 : 0 :  
1

f1-score precision recall support  
AFIB 0.818172 0.837757 0.800679 204.0  
GSVT 0.842265 0.830397 0.854829 300.0  
SB 0.864149 0.855370 0.873151 892.0  
SR 0.843495 0.855675 0.831725 681.0  
macro avg 0.842020 0.844800 0.840096 2077.0  
micro avg 0.849804 0.849804 0.849804 2077.0  
weighted avg 0.849701 0.850133 0.849804 2077.0

The result of Model Number:Dataset Number:Featuregroup Number:Rescale of 33 : 0 : 1 :  
0

f1-score precision recall support  
AFIB 0.661965 0.673876 0.650664 204.0  
GSVT 0.676899 0.667382 0.686804 300.0  
SB 0.687315 0.679194 0.695635 892.0  
SR 0.673492 0.685482 0.661921 681.0  
macro avg 0.674918 0.676484 0.673756 2077.0  
micro avg 0.678889 0.678889 0.678889 2077.0  
weighted avg 0.678788 0.679027 0.678889 2077.0

The result of Model Number:Dataset Number:Featuregroup Number:Rescale of 33 : 0 : 1 : 1

|              | f1-score | precision | recall   | support |
|--------------|----------|-----------|----------|---------|
| AFIB         | 0.888200 | 0.926668  | 0.853051 | 204.0   |
| GSVT         | 0.830313 | 0.838061  | 0.823123 | 300.0   |
| SB           | 0.860679 | 0.818364  | 0.907670 | 892.0   |
| SR           | 0.767099 | 0.815509  | 0.724362 | 681.0   |
| macro avg    | 0.836573 | 0.849651  | 0.827051 | 2077.0  |
| micro avg    | 0.829991 | 0.829991  | 0.829991 | 2077.0  |
| weighted avg | 0.828313 | 0.830910  | 0.829991 | 2077.0  |

The result of Model Number:Dataset Number:Featuregroup Number:Rescale of 33 : 0 : 2 : 0

|              | f1-score | precision | recall   | support |
|--------------|----------|-----------|----------|---------|
| AFIB         | 0.571804 | 0.633568  | 0.521118 | 204.0   |
| GSVT         | 0.662843 | 0.652063  | 0.674090 | 300.0   |
| SB           | 0.706882 | 0.703663  | 0.710130 | 892.0   |
| SR           | 0.689802 | 0.681024  | 0.698819 | 681.0   |
| macro avg    | 0.657833 | 0.667580  | 0.651039 | 2077.0  |
| micro avg    | 0.682651 | 0.682651  | 0.682651 | 2077.0  |
| weighted avg | 0.681654 | 0.681903  | 0.682651 | 2077.0  |

The result of Model Number:Dataset Number:Featuregroup Number:Rescale of 33 : 0 : 2 : 1

|              | f1-score | precision | recall   | support |
|--------------|----------|-----------|----------|---------|
| AFIB         | 0.682359 | 0.684054  | 0.680719 | 875.0   |
| GSVT         | 0.694111 | 0.696196  | 0.692126 | 691.0   |
| SB           | 0.736326 | 0.731328  | 0.741398 | 1553.0  |
| SR           | 0.722315 | 0.727677  | 0.717059 | 907.0   |
| macro avg    | 0.708778 | 0.709814  | 0.707825 | 4026.0  |
| micro avg    | 0.714270 | 0.714270  | 0.714270 | 4026.0  |
| weighted avg | 0.714195 | 0.714201  | 0.714270 | 4026.0  |

The result of Model Number:Dataset Number:Featuregroup Number:Rescale of 33 : 0 : 3 : 0

|              | f1-score | precision | recall   | support |
|--------------|----------|-----------|----------|---------|
| AFIB         | 0.913049 | 0.923724  | 0.902793 | 204.0   |
| GSVT         | 0.938166 | 0.933853  | 0.942546 | 300.0   |
| SB           | 0.951449 | 0.948491  | 0.954433 | 892.0   |
| SR           | 0.943255 | 0.945929  | 0.940637 | 681.0   |
| macro avg    | 0.936480 | 0.937999  | 0.935102 | 2077.0  |
| micro avg    | 0.943121 | 0.943121  | 0.943121 | 2077.0  |
| weighted avg | 0.943072 | 0.943104  | 0.943121 | 2077.0  |

The result of Model Number:Dataset Number:Featuregroup Number:Rescale of 33 : 0 : 3 : 1

|      | f1-score | precision | recall   | support |
|------|----------|-----------|----------|---------|
| AFIB | 0.893379 | 0.903306  | 0.884126 | 204.0   |

GSVT 0.921052 0.915809 0.926623 300.0  
SB 0.939375 0.938116 0.940638 892.0  
SR 0.931384 0.932632 0.930152 681.0  
macro avg 0.921297 0.922466 0.920385 2077.0  
micro avg 0.929625 0.929625 0.929625 2077.0  
weighted avg 0.929591 0.929677 0.929625 2077.0  
The result of Model Number:Dataset Number:Featuregroup Number:Rescale of 33 : 0 : 4 :  
0

f1-score precision recall support  
AFIB 0.801608 0.804366 0.798970 875.0  
GSVT 0.816826 0.800530 0.833947 691.0  
SB 0.864676 0.860000 0.869408 1553.0  
SR 0.831232 0.850559 0.812813 907.0  
macro avg 0.828585 0.828864 0.828785 4026.0  
micro avg 0.835263 0.835263 0.835263 4026.0  
weighted avg 0.835222 0.835574 0.835263 4026.0  
The result of Model Number:Dataset Number:Featuregroup Number:Rescale of 33 : 0 : 4 :  
1

f1-score precision recall support  
AFIB 0.843354 0.845044 0.841706 875.0  
GSVT 0.845442 0.840878 0.850079 691.0  
SB 0.883771 0.879050 0.888550 1553.0  
SR 0.862628 0.872858 0.852660 907.0  
macro avg 0.858799 0.859458 0.858249 4026.0  
micro avg 0.863681 0.863681 0.863681 4026.0  
weighted avg 0.863645 0.863713 0.863681 4026.0  
The result of Model Number:Dataset Number:Featuregroup Number:Rescale of 33 : 0 : 5 :  
0

f1-score precision recall support  
AFIB 0.697184 0.713112 0.682129 204.0  
GSVT 0.728856 0.724319 0.733469 300.0  
SB 0.744597 0.742288 0.746932 892.0  
SR 0.736070 0.736410 0.735750 681.0  
macro avg 0.726677 0.729032 0.724570 2077.0  
micro avg 0.734956 0.734956 0.734956 2077.0  
weighted avg 0.734871 0.734900 0.734956 2077.0  
The result of Model Number:Dataset Number:Featuregroup Number:Rescale of 33 : 0 : 5 :  
1

f1-score precision recall support  
AFIB 0.769878 0.802273 0.740067 204.0  
GSVT 0.795708 0.783529 0.808393 300.0  
SB 0.814900 0.809056 0.820840 892.0  
SR 0.793750 0.797787 0.789785 681.0  
macro avg 0.793559 0.798161 0.789771 2077.0

micro avg 0.800926 0.800926 0.800926 2077.0  
weighted avg 0.800772 0.801008 0.800926 2077.0  
The result of Model Number:Dataset Number:Featuregroup Number:Rescale of 33 : 0 : 6 :  
0

|              | f1-score | precision | recall   | support |
|--------------|----------|-----------|----------|---------|
| AFIB         | 0.690082 | 0.695046  | 0.685190 | 875.0   |
| GSVT         | 0.688982 | 0.684857  | 0.693169 | 691.0   |
| SB           | 0.726776 | 0.718723  | 0.735012 | 1553.0  |
| SR           | 0.697397 | 0.709840  | 0.685407 | 907.0   |
| macro avg    | 0.700809 | 0.702117  | 0.699694 | 4026.0  |
| micro avg    | 0.705827 | 0.705827  | 0.705827 | 4026.0  |
| weighted avg | 0.705696 | 0.705763  | 0.705827 | 4026.0  |

The result of Model Number:Dataset Number:Featuregroup Number:Rescale of 33 : 0 : 6 :  
1

|              | f1-score | precision | recall   | support |
|--------------|----------|-----------|----------|---------|
| AFIB         | 0.755169 | 0.762134  | 0.748512 | 204.0   |
| GSVT         | 0.782777 | 0.782805  | 0.782770 | 300.0   |
| SB           | 0.799171 | 0.797751  | 0.800602 | 892.0   |
| SR           | 0.790689 | 0.790478  | 0.790920 | 681.0   |
| macro avg    | 0.781952 | 0.783292  | 0.780701 | 2077.0  |
| micro avg    | 0.789736 | 0.789736  | 0.789736 | 2077.0  |
| weighted avg | 0.789700 | 0.789709  | 0.789736 | 2077.0  |

The result of Model Number:Dataset Number:Featuregroup Number:Rescale of 33 : 0 : 7 :  
0

|              | f1-score | precision | recall   | support |
|--------------|----------|-----------|----------|---------|
| AFIB         | 0.687949 | 0.681204  | 0.735555 | 204.0   |
| GSVT         | 0.616852 | 0.609994  | 0.624021 | 300.0   |
| SB           | 0.792693 | 0.786921  | 0.798556 | 892.0   |
| SR           | 0.779399 | 0.784797  | 0.774138 | 681.0   |
| macro avg    | 0.719223 | 0.715729  | 0.733067 | 2077.0  |
| micro avg    | 0.759152 | 0.759152  | 0.759152 | 2077.0  |
| weighted avg | 0.752648 | 0.750286  | 0.759152 | 2077.0  |

The result of Model Number:Dataset Number:Featuregroup Number:Rescale of 33 : 0 : 7 :  
1

|              | f1-score | precision | recall   | support |
|--------------|----------|-----------|----------|---------|
| AFIB         | 0.652193 | 0.636854  | 0.686616 | 875.0   |
| GSVT         | 0.626698 | 0.620921  | 0.640979 | 691.0   |
| SB           | 0.679697 | 0.631838  | 0.736183 | 1553.0  |
| SR           | 0.423799 | 0.531513  | 0.352932 | 907.0   |
| macro avg    | 0.595597 | 0.605281  | 0.604177 | 4026.0  |
| micro avg    | 0.622729 | 0.622729  | 0.622729 | 4026.0  |
| weighted avg | 0.606973 | 0.608453  | 0.622729 | 4026.0  |

The result of Model Number:Dataset Number:Featuregroup Number:Rescale of 33 : 0 : 8 :  
0

f1-score precision recall support  
AFIB 0.807204 0.785999 0.857738 875.0  
GSVT 0.776523 0.734989 0.885220 691.0  
SB 0.735796 0.731146 0.740527 1553.0  
SR 0.714709 0.727023 0.703005 907.0  
macro avg 0.758558 0.744789 0.796622 4026.0  
micro avg 0.782383 0.782383 0.782383 4026.0  
weighted avg 0.753555 0.742798 0.782383 4026.0  
The result of Model Number:Dataset Number:Featuregroup Number:Rescale of 33 : 0 : 8 :  
1

f1-score precision recall support  
AFIB 0.693474 0.706912 0.680849 204.0  
GSVT 0.720365 0.714342 0.726624 300.0  
SB 0.733807 0.732334 0.735287 892.0  
SR 0.726810 0.727563 0.726061 681.0  
macro avg 0.718614 0.720288 0.717205 2077.0  
micro avg 0.725664 0.725664 0.725664 2077.0  
weighted avg 0.725610 0.725674 0.725664 2077.0  
The result of Model Number:Dataset Number:Featuregroup Number:Rescale of 33 : 0 : 9 :  
0

f1-score precision recall support  
AFIB 0.878684 0.879468 0.877991 875.0  
GSVT 0.894779 0.897126 0.892594 691.0  
SB 0.949820 0.943496 0.956239 1553.0  
SR 0.931313 0.939816 0.922997 907.0  
macro avg 0.913649 0.914976 0.912455 4026.0  
micro avg 0.920820 0.920820 0.920820 4026.0  
weighted avg 0.920743 0.920792 0.920820 4026.0  
The result of Model Number:Dataset Number:Featuregroup Number:Rescale of 33 : 0 : 9 :  
1

f1-score precision recall support  
AFIB 0.670929 0.671406 0.670466 875.0  
GSVT 0.679970 0.681311 0.678693 691.0  
SB 0.722242 0.719842 0.724661 1553.0  
SR 0.705272 0.707893 0.702693 907.0  
macro avg 0.694603 0.695113 0.694128 4026.0  
micro avg 0.700043 0.700043 0.700043 4026.0  
weighted avg 0.700011 0.700010 0.700043 4026.0  
The result of Model Number:Dataset Number:Featuregroup Number:Rescale of 33 : 0 :  
10 : 0

f1-score precision recall support  
AFIB 0.803687 0.794714 0.812874 875.0  
GSVT 0.819677 0.827185 0.812317 691.0  
SB 0.874223 0.871376 0.877092 1553.0

SR 0.851560 0.860091 0.843199 907.0  
macro avg 0.837287 0.838341 0.836371 4026.0  
micro avg 0.844382 0.844382 0.844382 4026.0  
weighted avg 0.844425 0.844587 0.844382 4026.0  
The result of Model Number:Dataset Number:Featuregroup Number:Rescale of 33 : 0 :  
10 : 1

f1-score precision recall support  
AFIB 0.741086 0.736239 0.746060 875.0  
GSVT 0.763112 0.769605 0.756829 691.0  
SB 0.812436 0.810666 0.814215 1553.0  
SR 0.792636 0.795819 0.789491 907.0  
macro avg 0.777317 0.778082 0.776649 4026.0  
micro avg 0.783983 0.783983 0.783983 4026.0  
weighted avg 0.784002 0.784098 0.783983 4026.0  
The result of Model Number:Dataset Number:Featuregroup Number:Rescale of 33 : 1 : 0 :  
0

f1-score precision recall support  
AFIB 0.875417 0.864240 0.886938 875.0  
GSVT 0.890783 0.895891 0.885756 691.0  
SB 0.953528 0.949523 0.957575 1553.0  
SR 0.925452 0.940431 0.910958 907.0  
macro avg 0.911295 0.912521 0.910307 4026.0  
micro avg 0.919394 0.919394 0.919394 4026.0  
weighted avg 0.919457 0.919734 0.919394 4026.0  
The result of Model Number:Dataset Number:Featuregroup Number:Rescale of 33 : 1 : 0 :  
1

f1-score precision recall support  
AFIB 0.652813 0.685430 0.623487 204.0  
GSVT 0.672494 0.660031 0.685671 300.0  
SB 0.687884 0.680950 0.694975 892.0  
SR 0.668806 0.674780 0.662998 681.0  
macro avg 0.670499 0.675298 0.666783 2077.0  
micro avg 0.676125 0.676125 0.676125 2077.0  
weighted avg 0.675961 0.676346 0.676125 2077.0  
The result of Model Number:Dataset Number:Featuregroup Number:Rescale of 33 : 1 : 1 :  
0

f1-score precision recall support  
AFIB 0.853756 0.881486 0.827885 204.0  
GSVT 0.877327 0.866140 0.888983 300.0  
SB 0.902078 0.898677 0.905516 892.0  
SR 0.889462 0.891072 0.887891 681.0  
macro avg 0.880656 0.884344 0.877568 2077.0  
micro avg 0.889724 0.889724 0.889724 2077.0  
weighted avg 0.889620 0.889795 0.889724 2077.0



The result of Model Number:Dataset Number:Featuregroup Number:Rescale of 33 : 1 : 1 : 1

|              | f1-score | precision | recall   | support |
|--------------|----------|-----------|----------|---------|
| AFIB         | 0.630284 | 0.620793  | 0.645316 | 875.0   |
| GSVT         | 0.601807 | 0.600055  | 0.606941 | 691.0   |
| SB           | 0.642652 | 0.598850  | 0.698713 | 1553.0  |
| SR           | 0.476053 | 0.636341  | 0.394467 | 907.0   |
| macro avg    | 0.587699 | 0.614010  | 0.586359 | 4026.0  |
| micro avg    | 0.602814 | 0.602814  | 0.602814 | 4026.0  |
| weighted avg | 0.595421 | 0.612272  | 0.602814 | 4026.0  |

The result of Model Number:Dataset Number:Featuregroup Number:Rescale of 33 : 1 : 2 : 0

|              | f1-score | precision | recall   | support |
|--------------|----------|-----------|----------|---------|
| AFIB         | 0.173163 | 0.174981  | 0.171382 | 175.0   |
| GSVT         | 0.173442 | 0.171599  | 0.175324 | 138.2   |
| SB           | 0.182665 | 0.181964  | 0.183370 | 310.6   |
| SR           | 0.178437 | 0.179331  | 0.177552 | 181.4   |
| macro avg    | 0.176927 | 0.176969  | 0.176907 | 805.2   |
| micro avg    | 0.178073 | 0.178073  | 0.178073 | 805.2   |
| weighted avg | 0.178064 | 0.178074  | 0.178073 | 805.2   |

The result of Model Number:Dataset Number:Featuregroup Number:Rescale of 33 : 1 : 2 : 1

|              | f1-score | precision | recall   | support |
|--------------|----------|-----------|----------|---------|
| AFIB         | 0.701975 | 0.694138  | 0.710000 | 875.0   |
| GSVT         | 0.715942 | 0.722499  | 0.709513 | 691.0   |
| SB           | 0.763585 | 0.761098  | 0.766091 | 1553.0  |
| SR           | 0.743789 | 0.751241  | 0.736487 | 907.0   |
| macro avg    | 0.731323 | 0.732244  | 0.730523 | 4026.0  |
| micro avg    | 0.737520 | 0.737520  | 0.737520 | 4026.0  |
| weighted avg | 0.737558 | 0.737699  | 0.737520 | 4026.0  |

The result of Model Number:Dataset Number:Featuregroup Number:Rescale of 33 : 1 : 3 : 0

|              | f1-score | precision | recall   | support |
|--------------|----------|-----------|----------|---------|
| AFIB         | 0.689137 | 0.710036  | 0.669462 | 875.0   |
| GSVT         | 0.735664 | 0.730562  | 0.740877 | 691.0   |
| SB           | 0.804906 | 0.801827  | 0.808014 | 1553.0  |
| SR           | 0.761247 | 0.749821  | 0.773071 | 907.0   |
| macro avg    | 0.747738 | 0.748062  | 0.747856 | 4026.0  |
| micro avg    | 0.758506 | 0.758506  | 0.758506 | 4026.0  |
| weighted avg | 0.758025 | 0.757930  | 0.758506 | 4026.0  |

The result of Model Number:Dataset Number:Featuregroup Number:Rescale of 33 : 1 : 3 : 1

|      | f1-score | precision | recall   | support |
|------|----------|-----------|----------|---------|
| AFIB | 0.800354 | 0.789269  | 0.811788 | 875.0   |

GSVT 0.818106 0.824727 0.811594 691.0  
SB 0.868409 0.865914 0.870925 1553.0  
SR 0.847284 0.858311 0.836544 907.0  
macro avg 0.833538 0.834555 0.832713 4026.0  
micro avg 0.840143 0.840143 0.840143 4026.0  
weighted avg 0.840225 0.840474 0.840143 4026.0  
The result of Model Number:Dataset Number:Featuregroup Number:Rescale of 33 : 1 : 4 :  
0

f1-score precision recall support

AFIB 0.838594 0.828657 0.848843 875.0  
GSVT 0.850530 0.858752 0.842547 691.0  
SB 0.902696 0.899242 0.906183 1553.0  
SR 0.881650 0.891822 0.871733 907.0  
macro avg 0.868367 0.869618 0.867326 4026.0  
micro avg 0.875038 0.875038 0.875038 4026.0  
weighted avg 0.875069 0.875280 0.875038 4026.0  
The result of Model Number:Dataset Number:Featuregroup Number:Rescale of 33 : 1 : 4 :  
1

f1-score precision recall support

AFIB 0.773587 0.774277 0.772977 875.0  
GSVT 0.787757 0.789823 0.785833 691.0  
SB 0.836214 0.830647 0.841866 1553.0  
SR 0.819921 0.827407 0.812599 907.0  
macro avg 0.804370 0.805539 0.803319 4026.0  
micro avg 0.810683 0.810683 0.810683 4026.0  
weighted avg 0.810616 0.810659 0.810683 4026.0  
The result of Model Number:Dataset Number:Featuregroup Number:Rescale of 33 : 1 : 5 :  
0

f1-score precision recall support

AFIB 0.588646 0.641238 0.621623 204.0  
GSVT 0.799544 0.786474 0.813332 300.0  
SB 0.680659 0.675475 0.685975 892.0  
SR 0.832335 0.822918 0.841996 681.0  
macro avg 0.725296 0.731526 0.740731 2077.0  
micro avg 0.749205 0.749205 0.749205 2077.0  
weighted avg 0.738525 0.736488 0.749205 2077.0  
The result of Model Number:Dataset Number:Featuregroup Number:Rescale of 33 : 1 : 5 :  
1

f1-score precision recall support

AFIB 0.901373 0.902792 0.900075 204.0  
GSVT 0.923172 0.921732 0.924695 300.0  
SB 0.942217 0.941067 0.943376 892.0  
SR 0.935618 0.937414 0.933834 681.0  
macro avg 0.925595 0.925751 0.925495 2077.0

micro avg 0.933296 0.933296 0.933296 2077.0  
weighted avg 0.933291 0.933317 0.933296 2077.0  
The result of Model Number:Dataset Number:Featuregroup Number:Rescale of 33 : 1 : 6 :  
0

|              | f1-score | precision | recall   | support |
|--------------|----------|-----------|----------|---------|
| AFIB         | 0.760346 | 0.755078  | 0.765840 | 875.0   |
| GSVT         | 0.772076 | 0.775209  | 0.769093 | 691.0   |
| SB           | 0.837704 | 0.828993  | 0.846604 | 1553.0  |
| SR           | 0.795407 | 0.813915  | 0.777795 | 907.0   |
| macro avg    | 0.791383 | 0.793299  | 0.789833 | 4026.0  |
| micro avg    | 0.800246 | 0.800246  | 0.800246 | 4026.0  |
| weighted avg | 0.800098 | 0.800301  | 0.800246 | 4026.0  |

The result of Model Number:Dataset Number:Featuregroup Number:Rescale of 33 : 1 : 6 :  
1

|              | f1-score | precision | recall   | support |
|--------------|----------|-----------|----------|---------|
| AFIB         | 0.782376 | 0.773248  | 0.793762 | 875.0   |
| GSVT         | 0.805018 | 0.795260  | 0.815666 | 691.0   |
| SB           | 0.817152 | 0.785609  | 0.863418 | 1553.0  |
| SR           | 0.648861 | 0.683088  | 0.617939 | 907.0   |
| macro avg    | 0.763352 | 0.759301  | 0.772697 | 4026.0  |
| micro avg    | 0.784781 | 0.784781  | 0.784781 | 4026.0  |
| weighted avg | 0.769598 | 0.761482  | 0.784781 | 4026.0  |

The result of Model Number:Dataset Number:Featuregroup Number:Rescale of 33 : 1 : 7 :  
0

|              | f1-score | precision | recall   | support |
|--------------|----------|-----------|----------|---------|
| AFIB         | 0.788567 | 0.795144  | 0.782369 | 204.0   |
| GSVT         | 0.809398 | 0.805671  | 0.813177 | 300.0   |
| SB           | 0.821605 | 0.818686  | 0.824549 | 892.0   |
| SR           | 0.814016 | 0.817662  | 0.810445 | 681.0   |
| macro avg    | 0.808396 | 0.809291  | 0.807635 | 2077.0  |
| micro avg    | 0.814139 | 0.814139  | 0.814139 | 2077.0  |
| weighted avg | 0.814109 | 0.814158  | 0.814139 | 2077.0  |

The result of Model Number:Dataset Number:Featuregroup Number:Rescale of 33 : 1 : 7 :  
1

|              | f1-score | precision | recall   | support |
|--------------|----------|-----------|----------|---------|
| AFIB         | 0.756845 | 0.793081  | 0.723955 | 204.0   |
| GSVT         | 0.797162 | 0.788628  | 0.805912 | 300.0   |
| SB           | 0.814095 | 0.809597  | 0.818653 | 892.0   |
| SR           | 0.804898 | 0.804200  | 0.805611 | 681.0   |
| macro avg    | 0.793250 | 0.798877  | 0.788533 | 2077.0  |
| micro avg    | 0.803235 | 0.803235  | 0.803235 | 2077.0  |
| weighted avg | 0.803011 | 0.803177  | 0.803235 | 2077.0  |

The result of Model Number:Dataset Number:Featuregroup Number:Rescale of 33 : 1 : 8 :  
0

f1-score precision recall support  
AFIB 0.641128 0.635458 0.646927 875.0  
GSVT 0.582897 0.564491 0.648484 691.0  
SB 0.525513 0.504565 0.558272 1553.0  
SR 0.541617 0.547222 0.536162 907.0  
macro avg 0.572789 0.562934 0.597461 4026.0  
micro avg 0.588042 0.588042 0.588042 4026.0  
weighted avg 0.564118 0.552908 0.588042 4026.0  
The result of Model Number:Dataset Number:Featuregroup Number:Rescale of 33 : 1 : 8 :  
1

f1-score precision recall support  
AFIB 0.744839 0.748752 0.741012 875.0  
GSVT 0.757409 0.758815 0.756104 691.0  
SB 0.802200 0.796503 0.807983 1553.0  
SR 0.786819 0.791667 0.782049 907.0  
macro avg 0.772817 0.773934 0.771787 4026.0  
micro avg 0.778681 0.778681 0.778681 4026.0  
weighted avg 0.778581 0.778567 0.778681 4026.0  
The result of Model Number:Dataset Number:Featuregroup Number:Rescale of 33 : 1 : 9 :  
0

f1-score precision recall support  
AFIB 0.707588 0.704710 0.710506 875.0  
GSVT 0.717930 0.722270 0.713670 691.0  
SB 0.757193 0.756271 0.758119 1553.0  
SR 0.741396 0.742571 0.740247 907.0  
macro avg 0.731027 0.731455 0.730636 4026.0  
micro avg 0.736116 0.736116 0.736116 4026.0  
weighted avg 0.736114 0.736143 0.736116 4026.0  
The result of Model Number:Dataset Number:Featuregroup Number:Rescale of 33 : 1 : 9 :  
1

f1-score precision recall support  
AFIB 0.594718 0.580730 0.626108 875.0  
GSVT 0.571470 0.566201 0.584492 691.0  
SB 0.619798 0.576157 0.671306 1553.0  
SR 0.386452 0.484673 0.321829 907.0  
macro avg 0.543109 0.551940 0.550934 4026.0  
micro avg 0.567850 0.567850 0.567850 4026.0  
weighted avg 0.553483 0.554832 0.567850 4026.0  
The result of Model Number:Dataset Number:Featuregroup Number:Rescale of 33 : 1 :  
10 : 0

f1-score precision recall support  
AFIB 0.815575 0.861970 0.774459 204.0  
GSVT 0.861878 0.852387 0.871627 300.0  
SB 0.874699 0.865996 0.883609 892.0

SR 0.864538 0.867493 0.861739 681.0  
macro avg 0.854172 0.861962 0.847858 2077.0  
micro avg 0.863987 0.863987 0.863987 2077.0  
weighted avg 0.863708 0.864126 0.863987 2077.0  
The result of Model Number:Dataset Number:Featuregroup Number:Rescale of 33 : 1 : 10 : 1

f1-score precision recall support  
AFIB 0.638443 0.630773 0.646326 875.0  
GSVT 0.650723 0.655991 0.645542 691.0  
SB 0.693620 0.690965 0.696298 1553.0  
SR 0.677357 0.686018 0.668920 907.0  
macro avg 0.665036 0.665937 0.664272 4026.0  
micro avg 0.670558 0.670558 0.670558 4026.0  
weighted avg 0.670601 0.670766 0.670558 4026.0

The result of Model Number:Dataset Number:Featuregroup Number:Rescale of 34 : 0 : 0 : 0

f1-score precision recall support  
AFIB 0.674685 0.668432 0.681094 875.0  
GSVT 0.686801 0.690531 0.683123 691.0  
SB 0.727705 0.726027 0.729391 1553.0  
SR 0.710750 0.717309 0.704333 907.0  
macro avg 0.699985 0.700575 0.699485 4026.0  
micro avg 0.705308 0.705308 0.705308 4026.0  
weighted avg 0.705342 0.705453 0.705308 4026.0

The result of Model Number:Dataset Number:Featuregroup Number:Rescale of 34 : 0 : 0 : 1

f1-score precision recall support  
AFIB 0.759811 0.752859 0.766925 875.0  
GSVT 0.769546 0.776336 0.762989 691.0  
SB 0.818003 0.813690 0.822373 1553.0  
SR 0.799511 0.809146 0.790176 907.0  
macro avg 0.786718 0.788008 0.785616 4026.0  
micro avg 0.792876 0.792876 0.792876 4026.0  
weighted avg 0.792873 0.793034 0.792876 4026.0

The result of Model Number:Dataset Number:Featuregroup Number:Rescale of 34 : 0 : 1 : 0

f1-score precision recall support  
AFIB 0.777913 0.795217 0.761512 204.0  
GSVT 0.811056 0.806016 0.816191 300.0  
SB 0.828662 0.826917 0.830425 892.0  
SR 0.819836 0.819256 0.820442 681.0  
macro avg 0.809367 0.811851 0.807143 2077.0  
micro avg 0.818327 0.818327 0.818327 2077.0  
weighted avg 0.818241 0.818273 0.818327 2077.0

The result of Model Number:Dataset Number:Featuregroup Number:Rescale of 34 : 0 : 1 : 1

|              | f1-score | precision | recall   | support |
|--------------|----------|-----------|----------|---------|
| AFIB         | 0.677282 | 0.702286  | 0.654059 | 204.0   |
| GSVT         | 0.691758 | 0.684658  | 0.699114 | 300.0   |
| SB           | 0.710704 | 0.707390  | 0.714051 | 892.0   |
| SR           | 0.699623 | 0.700061  | 0.699208 | 681.0   |
| macro avg    | 0.694842 | 0.698599  | 0.691608 | 2077.0  |
| micro avg    | 0.701135 | 0.701135  | 0.701135 | 2077.0  |
| weighted avg | 0.701052 | 0.701203  | 0.701135 | 2077.0  |

The result of Model Number:Dataset Number:Featuregroup Number:Rescale of 34 : 0 : 2 : 0

|              | f1-score | precision | recall   | support |
|--------------|----------|-----------|----------|---------|
| AFIB         | 0.631592 | 0.587333  | 0.741685 | 875.0   |
| GSVT         | 0.541671 | 0.505726  | 0.612685 | 691.0   |
| SB           | 0.647262 | 0.641801  | 0.652832 | 1553.0  |
| SR           | 0.623867 | 0.638989  | 0.609662 | 907.0   |
| macro avg    | 0.611098 | 0.593462  | 0.654216 | 4026.0  |
| micro avg    | 0.655527 | 0.655527  | 0.655527 | 4026.0  |
| weighted avg | 0.620463 | 0.605974  | 0.655527 | 4026.0  |

The result of Model Number:Dataset Number:Featuregroup Number:Rescale of 34 : 0 : 2 : 1

|              | f1-score | precision | recall   | support |
|--------------|----------|-----------|----------|---------|
| AFIB         | 0.732348 | 0.720862  | 0.744285 | 875.0   |
| GSVT         | 0.705665 | 0.725895  | 0.686614 | 691.0   |
| SB           | 0.741537 | 0.703948  | 0.783409 | 1553.0  |
| SR           | 0.602495 | 0.670454  | 0.547138 | 907.0   |
| macro avg    | 0.695511 | 0.705290  | 0.690362 | 4026.0  |
| micro avg    | 0.705064 | 0.705064  | 0.705064 | 4026.0  |
| weighted avg | 0.702059 | 0.703845  | 0.705064 | 4026.0  |

The result of Model Number:Dataset Number:Featuregroup Number:Rescale of 34 : 0 : 3 : 0

|              | f1-score | precision | recall   | support |
|--------------|----------|-----------|----------|---------|
| AFIB         | 0.877931 | 0.915954  | 0.843188 | 204.0   |
| GSVT         | 0.820713 | 0.828372  | 0.813606 | 300.0   |
| SB           | 0.850729 | 0.808903  | 0.897176 | 892.0   |
| SR           | 0.758230 | 0.806080  | 0.715987 | 681.0   |
| macro avg    | 0.826901 | 0.839827  | 0.817489 | 2077.0  |
| micro avg    | 0.820395 | 0.820395  | 0.820395 | 2077.0  |
| weighted avg | 0.818737 | 0.821304  | 0.820395 | 2077.0  |

The result of Model Number:Dataset Number:Featuregroup Number:Rescale of 34 : 0 : 3 : 1

|      | f1-score | precision | recall   | support |
|------|----------|-----------|----------|---------|
| AFIB | 0.792636 | 0.833585  | 0.755756 | 204.0   |

GSVT 0.831146 0.823022 0.839450 300.0  
SB 0.845801 0.838997 0.852721 892.0  
SR 0.835354 0.836370 0.834373 681.0  
macro avg 0.826234 0.832994 0.820575 2077.0  
micro avg 0.835265 0.835265 0.835265 2077.0  
weighted avg 0.835037 0.835297 0.835265 2077.0  
The result of Model Number:Dataset Number:Featuregroup Number:Rescale of 34 : 0 : 4 :  
0

f1-score precision recall support

AFIB 0.811831 0.803665 0.820187 875.0  
GSVT 0.819096 0.826389 0.811991 691.0  
SB 0.866568 0.863908 0.869245 1553.0  
SR 0.849787 0.857225 0.842479 907.0  
macro avg 0.836820 0.837797 0.835976 4026.0  
micro avg 0.842726 0.842726 0.842726 4026.0  
weighted avg 0.842743 0.842870 0.842726 4026.0  
The result of Model Number:Dataset Number:Featuregroup Number:Rescale of 34 : 0 : 4 :  
1

f1-score precision recall support

AFIB 0.756114 0.750057 0.762357 875.0  
GSVT 0.776995 0.778321 0.775765 691.0  
SB 0.823738 0.821530 0.825965 1553.0  
SR 0.801231 0.810558 0.792133 907.0  
macro avg 0.789519 0.790117 0.789055 4026.0  
micro avg 0.795903 0.795903 0.795903 4026.0  
weighted avg 0.795947 0.796108 0.795903 4026.0  
The result of Model Number:Dataset Number:Featuregroup Number:Rescale of 34 : 0 : 5 :  
0

f1-score precision recall support

AFIB 0.811036 0.813827 0.808367 875.0  
GSVT 0.826434 0.809945 0.843756 691.0  
SB 0.874846 0.870115 0.879634 1553.0  
SR 0.841009 0.860563 0.822373 907.0  
macro avg 0.838331 0.838613 0.838533 4026.0  
micro avg 0.845087 0.845087 0.845087 4026.0  
weighted avg 0.845046 0.845402 0.845087 4026.0  
The result of Model Number:Dataset Number:Featuregroup Number:Rescale of 34 : 0 : 5 :  
1

f1-score precision recall support

AFIB 0.810241 0.833043 0.788821 204.0  
GSVT 0.831189 0.825354 0.837263 300.0  
SB 0.854046 0.850629 0.857492 892.0  
SR 0.842694 0.843221 0.842193 681.0  
macro avg 0.834543 0.838062 0.831442 2077.0

micro avg 0.842809 0.842809 0.842809 2077.0  
weighted avg 0.842720 0.842822 0.842809 2077.0  
The result of Model Number:Dataset Number:Featuregroup Number:Rescale of 34 : 0 : 6 :  
0

|              | f1-score | precision | recall   | support |
|--------------|----------|-----------|----------|---------|
| AFIB         | 0.844415 | 0.875721  | 0.815389 | 204.0   |
| GSVT         | 0.869712 | 0.858837  | 0.880976 | 300.0   |
| SB           | 0.891766 | 0.883629  | 0.900062 | 892.0   |
| SR           | 0.868321 | 0.875060  | 0.861694 | 681.0   |
| macro avg    | 0.868553 | 0.873312  | 0.864530 | 2077.0  |
| micro avg    | 0.876409 | 0.876409  | 0.876409 | 2077.0  |
| weighted avg | 0.876243 | 0.876462  | 0.876409 | 2077.0  |

The result of Model Number:Dataset Number:Featuregroup Number:Rescale of 34 : 0 : 6 :  
1

|              | f1-score | precision | recall   | support |
|--------------|----------|-----------|----------|---------|
| AFIB         | 0.787037 | 0.802894  | 0.772299 | 204.0   |
| GSVT         | 0.812291 | 0.805767  | 0.819078 | 300.0   |
| SB           | 0.829876 | 0.829040  | 0.830713 | 892.0   |
| SR           | 0.822311 | 0.821839  | 0.822793 | 681.0   |
| macro avg    | 0.812879 | 0.814885  | 0.811221 | 2077.0  |
| micro avg    | 0.820699 | 0.820699  | 0.820699 | 2077.0  |
| weighted avg | 0.820648 | 0.820750  | 0.820699 | 2077.0  |

The result of Model Number:Dataset Number:Featuregroup Number:Rescale of 34 : 0 : 7 :  
0

|              | f1-score | precision | recall   | support |
|--------------|----------|-----------|----------|---------|
| AFIB         | 0.811104 | 0.810361  | 0.811945 | 875.0   |
| GSVT         | 0.827729 | 0.826123  | 0.829428 | 691.0   |
| SB           | 0.878328 | 0.876372  | 0.880307 | 1553.0  |
| SR           | 0.854355 | 0.859929  | 0.848884 | 907.0   |
| macro avg    | 0.842879 | 0.843196  | 0.842641 | 4026.0  |
| micro avg    | 0.849637 | 0.849637  | 0.849637 | 4026.0  |
| weighted avg | 0.849632 | 0.849696  | 0.849637 | 4026.0  |

The result of Model Number:Dataset Number:Featuregroup Number:Rescale of 34 : 0 : 7 :  
1

|              | f1-score | precision | recall   | support |
|--------------|----------|-----------|----------|---------|
| AFIB         | 0.777461 | 0.820074  | 0.739574 | 204.0   |
| GSVT         | 0.740308 | 0.766264  | 0.716145 | 300.0   |
| SB           | 0.761480 | 0.732110  | 0.793317 | 892.0   |
| SR           | 0.677737 | 0.696124  | 0.660335 | 681.0   |
| macro avg    | 0.739247 | 0.753643  | 0.727343 | 2077.0  |
| micro avg    | 0.733290 | 0.733290  | 0.733290 | 2077.0  |
| weighted avg | 0.732534 | 0.733884  | 0.733290 | 2077.0  |

The result of Model Number:Dataset Number:Featuregroup Number:Rescale of 34 : 0 : 8 :  
0



f1-score precision recall support  
AFIB 0.859041 0.876195 0.842676 204.0  
GSVT 0.868688 0.857834 0.879952 300.0  
SB 0.885273 0.876808 0.893904 892.0  
SR 0.869196 0.880598 0.858109 681.0  
macro avg 0.870549 0.872859 0.868660 2077.0  
micro avg 0.875121 0.875121 0.875121 2077.0  
weighted avg 0.875030 0.875250 0.875121 2077.0  
The result of Model Number:Dataset Number:Featuregroup Number:Rescale of 34 : 0 : 8 :  
1

f1-score precision recall support  
AFIB 0.631732 0.641990 0.621830 875.0  
GSVT 0.671865 0.673971 0.669813 691.0  
SB 0.730955 0.728437 0.733496 1553.0  
SR 0.692002 0.684294 0.699927 907.0  
macro avg 0.681638 0.682173 0.681266 4026.0  
micro avg 0.690734 0.690734 0.690734 4026.0  
weighted avg 0.690473 0.690356 0.690734 4026.0  
The result of Model Number:Dataset Number:Featuregroup Number:Rescale of 34 : 0 : 9 :  
0

f1-score precision recall support  
AFIB 0.680783 0.698022 0.664439 204.0  
GSVT 0.695568 0.688004 0.703416 300.0  
SB 0.715160 0.711591 0.718767 892.0  
SR 0.704075 0.707234 0.700972 681.0  
macro avg 0.698897 0.701213 0.696899 2077.0  
micro avg 0.705379 0.705379 0.705379 2077.0  
weighted avg 0.705319 0.705423 0.705379 2077.0  
The result of Model Number:Dataset Number:Featuregroup Number:Rescale of 34 : 0 : 9 :  
1

f1-score precision recall support  
AFIB 0.650514 0.649133 0.651930 875.0  
GSVT 0.660677 0.657510 0.663930 691.0  
SB 0.695360 0.687059 0.703866 1553.0  
SR 0.663045 0.681830 0.645281 907.0  
macro avg 0.667399 0.668883 0.666252 4026.0  
micro avg 0.672525 0.672525 0.672525 4026.0  
weighted avg 0.672380 0.672566 0.672525 4026.0  
The result of Model Number:Dataset Number:Featuregroup Number:Rescale of 34 : 0 :  
10 : 0

f1-score precision recall support  
AFIB 0.790448 0.797625 0.783806 204.0  
GSVT 0.816573 0.811638 0.821782 300.0  
SB 0.833657 0.832540 0.834778 892.0

SR 0.825943 0.827656 0.824243 681.0  
macro avg 0.816655 0.817365 0.816152 2077.0  
micro avg 0.824440 0.824440 0.824440 2077.0  
weighted avg 0.824416 0.824490 0.824440 2077.0  
The result of Model Number:Dataset Number:Featuregroup Number:Rescale of 34 : 0 :  
10 : 1

f1-score precision recall support  
AFIB 0.755843 0.758671 0.753358 875.0  
GSVT 0.772857 0.780313 0.765697 691.0  
SB 0.821789 0.813169 0.830656 1553.0  
SR 0.793331 0.800313 0.786743 907.0  
macro avg 0.785955 0.788117 0.784114 4026.0  
micro avg 0.792814 0.792814 0.792814 4026.0  
weighted avg 0.792647 0.792789 0.792814 4026.0  
The result of Model Number:Dataset Number:Featuregroup Number:Rescale of 34 : 1 : 0 :  
0

f1-score precision recall support  
AFIB 0.672668 0.652562 0.717239 875.0  
GSVT 0.576040 0.563426 0.589446 691.0  
SB 0.764049 0.757824 0.770580 1553.0  
SR 0.716788 0.746882 0.690370 907.0  
macro avg 0.682386 0.680173 0.691909 4026.0  
micro avg 0.709828 0.709828 0.709828 4026.0  
weighted avg 0.701272 0.699116 0.709828 4026.0  
The result of Model Number:Dataset Number:Featuregroup Number:Rescale of 34 : 1 : 0 :  
1

f1-score precision recall support  
AFIB 0.911085 0.923150 0.899468 204.0  
GSVT 0.938579 0.935192 0.942012 300.0  
SB 0.950269 0.947312 0.953250 892.0  
SR 0.939915 0.941725 0.938138 681.0  
macro avg 0.934962 0.936845 0.933217 2077.0  
micro avg 0.941389 0.941389 0.941389 2077.0  
weighted avg 0.941337 0.941357 0.941389 2077.0  
The result of Model Number:Dataset Number:Featuregroup Number:Rescale of 34 : 1 : 1 :  
0

f1-score precision recall support  
AFIB 0.686509 0.703631 0.670254 875.0  
GSVT 0.730326 0.733126 0.727581 691.0  
SB 0.790882 0.787052 0.794751 1553.0  
SR 0.749404 0.736913 0.762374 907.0  
macro avg 0.739280 0.740180 0.738740 4026.0  
micro avg 0.748870 0.748870 0.748870 4026.0  
weighted avg 0.748460 0.748370 0.748870 4026.0

The result of Model Number:Dataset Number:Featuregroup Number:Rescale of 34 : 1 : 1 :  
1

|              | f1-score | precision | recall   | support |
|--------------|----------|-----------|----------|---------|
| AFIB         | 0.732206 | 0.721181  | 0.749670 | 875.0   |
| GSVT         | 0.699125 | 0.697090  | 0.705088 | 691.0   |
| SB           | 0.746575 | 0.695689  | 0.811701 | 1553.0  |
| SR           | 0.553035 | 0.739243  | 0.458256 | 907.0   |
| macro avg    | 0.682735 | 0.713301  | 0.681179 | 4026.0  |
| micro avg    | 0.700295 | 0.700295  | 0.700295 | 4026.0  |
| weighted avg | 0.691706 | 0.711282  | 0.700295 | 4026.0  |

The result of Model Number:Dataset Number:Featuregroup Number:Rescale of 34 : 1 : 2 :  
0

|              | f1-score | precision | recall   | support |
|--------------|----------|-----------|----------|---------|
| AFIB         | 0.711661 | 0.702726  | 0.721033 | 875.0   |
| GSVT         | 0.660281 | 0.680272  | 0.643639 | 691.0   |
| SB           | 0.710897 | 0.658448  | 0.774305 | 1553.0  |
| SR           | 0.552745 | 0.676518  | 0.471338 | 907.0   |
| macro avg    | 0.658896 | 0.679491  | 0.652579 | 4026.0  |
| micro avg    | 0.672046 | 0.672046  | 0.672046 | 4026.0  |
| weighted avg | 0.666746 | 0.675888  | 0.672046 | 4026.0  |

The result of Model Number:Dataset Number:Featuregroup Number:Rescale of 34 : 1 : 2 :  
1

|              | f1-score | precision | recall   | support |
|--------------|----------|-----------|----------|---------|
| AFIB         | 0.692322 | 0.677528  | 0.707817 | 875.0   |
| GSVT         | 0.716944 | 0.727907  | 0.706370 | 691.0   |
| SB           | 0.764260 | 0.764361  | 0.764163 | 1553.0  |
| SR           | 0.744571 | 0.752282  | 0.737020 | 907.0   |
| macro avg    | 0.729524 | 0.730520  | 0.728842 | 4026.0  |
| micro avg    | 0.735883 | 0.735883  | 0.735883 | 4026.0  |
| weighted avg | 0.736069 | 0.736511  | 0.735883 | 4026.0  |

The result of Model Number:Dataset Number:Featuregroup Number:Rescale of 34 : 1 : 3 :  
0

|              | f1-score | precision | recall   | support |
|--------------|----------|-----------|----------|---------|
| AFIB         | 0.880385 | 0.901459  | 0.861562 | 204.0   |
| GSVT         | 0.906310 | 0.893540  | 0.919829 | 300.0   |
| SB           | 0.929858 | 0.920411  | 0.939544 | 892.0   |
| SR           | 0.907634 | 0.920739  | 0.894968 | 681.0   |
| macro avg    | 0.906047 | 0.909037  | 0.903976 | 2077.0  |
| micro avg    | 0.914422 | 0.914422  | 0.914422 | 2077.0  |
| weighted avg | 0.914311 | 0.914776  | 0.914422 | 2077.0  |

The result of Model Number:Dataset Number:Featuregroup Number:Rescale of 34 : 1 : 3 :  
1

|      | f1-score | precision | recall   | support |
|------|----------|-----------|----------|---------|
| AFIB | 0.800835 | 0.805214  | 0.796529 | 875.0   |

GSVT 0.797018 0.790298 0.803934 691.0  
SB 0.838264 0.830325 0.846359 1553.0  
SR 0.807066 0.822121 0.792564 907.0  
macro avg 0.810796 0.811990 0.809847 4026.0  
micro avg 0.816128 0.816128 0.816128 4026.0  
weighted avg 0.816022 0.816149 0.816128 4026.0  
The result of Model Number:Dataset Number:Featuregroup Number:Rescale of 34 : 1 : 4 :  
0

f1-score precision recall support  
AFIB 0.758298 0.776748 0.740891 204.0  
GSVT 0.767830 0.757260 0.778802 300.0  
SB 0.783335 0.775512 0.791322 892.0  
SR 0.769658 0.779758 0.759838 681.0  
macro avg 0.769780 0.772320 0.767713 2077.0  
micro avg 0.774238 0.774238 0.774238 2077.0  
weighted avg 0.774152 0.774389 0.774238 2077.0  
The result of Model Number:Dataset Number:Featuregroup Number:Rescale of 34 : 1 : 4 :  
1

f1-score precision recall support  
AFIB 0.572500 0.623649 0.604572 204.0  
GSVT 0.777613 0.764902 0.791023 300.0  
SB 0.661989 0.656947 0.667159 892.0  
SR 0.809505 0.800346 0.818900 681.0  
macro avg 0.705402 0.711461 0.720414 2077.0  
micro avg 0.728655 0.728655 0.728655 2077.0  
weighted avg 0.718267 0.716286 0.728655 2077.0  
The result of Model Number:Dataset Number:Featuregroup Number:Rescale of 34 : 1 : 5 :  
0

f1-score precision recall support  
AFIB 0.598305 0.661568 0.546395 204.0  
GSVT 0.688427 0.680460 0.696715 300.0  
SB 0.727860 0.724867 0.730879 892.0  
SR 0.712229 0.701679 0.723108 681.0  
macro avg 0.681705 0.692143 0.674274 2077.0  
micro avg 0.705277 0.705277 0.705277 2077.0  
weighted avg 0.704314 0.704633 0.705277 2077.0  
The result of Model Number:Dataset Number:Featuregroup Number:Rescale of 34 : 1 : 5 :  
1

f1-score precision recall support  
AFIB 0.766921 0.770573 0.763337 875.0  
GSVT 0.776395 0.762285 0.791116 691.0  
SB 0.821484 0.818339 0.824657 1553.0  
SR 0.797203 0.810849 0.784022 907.0  
macro avg 0.790501 0.790511 0.790783 4026.0

micro avg 0.796419 0.796419 0.796419 4026.0  
weighted avg 0.796417 0.796649 0.796419 4026.0  
The result of Model Number:Dataset Number:Featuregroup Number:Rescale of 34 : 1 : 6 :  
0

|              | f1-score | precision | recall   | support |
|--------------|----------|-----------|----------|---------|
| AFIB         | 0.699868 | 0.703200  | 0.696598 | 875.0   |
| GSVT         | 0.708513 | 0.695638  | 0.721948 | 691.0   |
| SB           | 0.749661 | 0.746790  | 0.752556 | 1553.0  |
| SR           | 0.727503 | 0.739955  | 0.715474 | 907.0   |
| macro avg    | 0.721386 | 0.721396  | 0.721644 | 4026.0  |
| micro avg    | 0.726787 | 0.726787  | 0.726787 | 4026.0  |
| weighted avg | 0.726785 | 0.726997  | 0.726787 | 4026.0  |

The result of Model Number:Dataset Number:Featuregroup Number:Rescale of 34 : 1 : 6 :  
1

|              | f1-score | precision | recall   | support |
|--------------|----------|-----------|----------|---------|
| AFIB         | 0.696693 | 0.691867  | 0.701728 | 875.0   |
| GSVT         | 0.707441 | 0.710312  | 0.704708 | 691.0   |
| SB           | 0.767575 | 0.759594  | 0.775730 | 1553.0  |
| SR           | 0.728820 | 0.745778  | 0.712682 | 907.0   |
| macro avg    | 0.725132 | 0.726888  | 0.723712 | 4026.0  |
| micro avg    | 0.733253 | 0.733253  | 0.733253 | 4026.0  |
| weighted avg | 0.733118 | 0.733303  | 0.733253 | 4026.0  |

The result of Model Number:Dataset Number:Featuregroup Number:Rescale of 34 : 1 : 7 :  
0

|              | f1-score | precision | recall   | support |
|--------------|----------|-----------|----------|---------|
| AFIB         | 0.861195 | 0.861605  | 0.860909 | 875.0   |
| GSVT         | 0.883498 | 0.875851  | 0.891311 | 691.0   |
| SB           | 0.943579 | 0.936703  | 0.950566 | 1553.0  |
| SR           | 0.903268 | 0.921225  | 0.886046 | 907.0   |
| macro avg    | 0.897885 | 0.898846  | 0.897208 | 4026.0  |
| micro avg    | 0.906374 | 0.906374  | 0.906374 | 4026.0  |
| weighted avg | 0.906281 | 0.906450  | 0.906374 | 4026.0  |

The result of Model Number:Dataset Number:Featuregroup Number:Rescale of 34 : 1 : 7 :  
1

|              | f1-score | precision | recall   | support |
|--------------|----------|-----------|----------|---------|
| AFIB         | 0.683543 | 0.753803  | 0.625684 | 204.0   |
| GSVT         | 0.813396 | 0.802404  | 0.824775 | 300.0   |
| SB           | 0.866209 | 0.862745  | 0.869705 | 892.0   |
| SR           | 0.842699 | 0.831308  | 0.854443 | 681.0   |
| macro avg    | 0.801462 | 0.812565  | 0.793652 | 2077.0  |
| micro avg    | 0.834244 | 0.834244  | 0.834244 | 2077.0  |
| weighted avg | 0.832931 | 0.833022  | 0.834244 | 2077.0  |

The result of Model Number:Dataset Number:Featuregroup Number:Rescale of 34 : 1 : 8 :  
0

f1-score precision recall support  
AFIB 0.871056 0.895569 0.848028 204.0  
GSVT 0.893575 0.887303 0.900105 300.0  
SB 0.918149 0.914475 0.921853 892.0  
SR 0.905945 0.906511 0.905406 681.0  
macro avg 0.897181 0.900965 0.893848 2077.0  
micro avg 0.906068 0.906068 0.906068 2077.0  
weighted avg 0.905972 0.906082 0.906068 2077.0  
The result of Model Number:Dataset Number:Featuregroup Number:Rescale of 34 : 1 : 8 :  
1

f1-score precision recall support  
AFIB 0.720858 0.722864 0.718902 875.0  
GSVT 0.737371 0.737166 0.737583 691.0  
SB 0.785323 0.777942 0.792855 1553.0  
SR 0.764514 0.775539 0.753807 907.0  
macro avg 0.752017 0.753378 0.750787 4026.0  
micro avg 0.758499 0.758499 0.758499 4026.0  
weighted avg 0.758394 0.758432 0.758499 4026.0  
The result of Model Number:Dataset Number:Featuregroup Number:Rescale of 34 : 1 : 9 :  
0

f1-score precision recall support  
AFIB 0.659434 0.727215 0.603615 204.0  
GSVT 0.784707 0.774102 0.795684 300.0  
SB 0.835657 0.832315 0.839029 892.0  
SR 0.812976 0.801986 0.824306 681.0  
macro avg 0.773193 0.783905 0.765659 2077.0  
micro avg 0.804819 0.804819 0.804819 2077.0  
weighted avg 0.803553 0.803640 0.804819 2077.0  
The result of Model Number:Dataset Number:Featuregroup Number:Rescale of 34 : 1 : 9 :  
1

f1-score precision recall support  
AFIB 0.857484 0.865867 0.849463 875.0  
GSVT 0.850934 0.844478 0.857770 691.0  
SB 0.900385 0.891121 0.909923 1553.0  
SR 0.871806 0.885826 0.858468 907.0  
macro avg 0.870152 0.871823 0.868906 4026.0  
micro avg 0.876240 0.876240 0.876240 4026.0  
weighted avg 0.876135 0.876434 0.876240 4026.0  
The result of Model Number:Dataset Number:Featuregroup Number:Rescale of 34 : 1 :  
10 : 0

f1-score precision recall support  
AFIB 0.796543 0.814555 0.779334 875.0  
GSVT 0.844517 0.848111 0.841003 691.0  
SB 0.916970 0.912648 0.921338 1553.0

SR 0.868816 0.855490 0.882601 907.0  
macro avg 0.856711 0.857701 0.856069 4026.0  
micro avg 0.867960 0.867960 0.867960 4026.0  
weighted avg 0.867513 0.867375 0.867960 4026.0  
The result of Model Number:Dataset Number:Featuregroup Number:Rescale of 34 : 1 :

10 : 1

f1-score precision recall support

AFIB 0.726179 0.732675 0.719887 875.0  
GSVT 0.740048 0.725976 0.754818 691.0  
SB 0.785499 0.778694 0.792427 1553.0  
SR 0.753237 0.770556 0.736713 907.0  
macro avg 0.751241 0.751975 0.750961 4026.0  
micro avg 0.757655 0.757655 0.757655 4026.0  
weighted avg 0.757537 0.757811 0.757655 4026.0

The result of Model Number:Dataset Number:Featuregroup Number:Rescale of 35 : 0 : 0 : 0

f1-score precision recall support

AFIB 0.708946 0.697596 0.797708 204.0  
GSVT 0.829989 0.820358 0.840151 300.0  
SB 0.857780 0.854541 0.861049 892.0  
SR 0.673030 0.676510 0.669700 681.0  
macro avg 0.767436 0.762251 0.792152 2077.0  
micro avg 0.789071 0.789071 0.789071 2077.0  
weighted avg 0.778572 0.775816 0.789071 2077.0

The result of Model Number:Dataset Number:Featuregroup Number:Rescale of 35 : 0 : 0 : 1

f1-score precision recall support

AFIB 0.836070 0.855170 0.818016 204.0  
GSVT 0.874051 0.868610 0.879583 300.0  
SB 0.892928 0.890159 0.895728 892.0  
SR 0.882702 0.883111 0.882318 681.0  
macro avg 0.871438 0.874262 0.868911 2077.0  
micro avg 0.881366 0.881366 0.881366 2077.0  
weighted avg 0.881264 0.881299 0.881366 2077.0

The result of Model Number:Dataset Number:Featuregroup Number:Rescale of 35 : 0 : 1 : 0

f1-score precision recall support

AFIB 0.736554 0.728330 0.744973 875.0  
GSVT 0.751208 0.758089 0.744463 691.0  
SB 0.801198 0.798589 0.803827 1553.0  
SR 0.780428 0.788246 0.772766 907.0  
macro avg 0.767347 0.768313 0.766507 4026.0  
micro avg 0.773850 0.773850 0.773850 4026.0  
weighted avg 0.773889 0.774038 0.773850 4026.0

The result of Model Number:Dataset Number:Featuregroup Number:Rescale of 35 : 0 : 1 :  
1

|              | f1-score | precision | recall   | support |
|--------------|----------|-----------|----------|---------|
| AFIB         | 0.801405 | 0.801786  | 0.801139 | 875.0   |
| GSVT         | 0.822159 | 0.815043  | 0.829430 | 691.0   |
| SB           | 0.878069 | 0.871671  | 0.884571 | 1553.0  |
| SR           | 0.840557 | 0.857267  | 0.824530 | 907.0   |
| macro avg    | 0.835548 | 0.836442  | 0.834917 | 4026.0  |
| micro avg    | 0.843447 | 0.843447  | 0.843447 | 4026.0  |
| weighted avg | 0.843360 | 0.843518  | 0.843447 | 4026.0  |

The result of Model Number:Dataset Number:Featuregroup Number:Rescale of 35 : 0 : 2 :  
0

|              | f1-score | precision | recall   | support |
|--------------|----------|-----------|----------|---------|
| AFIB         | 0.667882 | 0.642349  | 0.709894 | 875.0   |
| GSVT         | 0.692039 | 0.668155  | 0.724435 | 691.0   |
| SB           | 0.771060 | 0.757450  | 0.786015 | 1553.0  |
| SR           | 0.653070 | 0.785279  | 0.563838 | 907.0   |
| macro avg    | 0.696013 | 0.713308  | 0.696046 | 4026.0  |
| micro avg    | 0.708849 | 0.708849  | 0.708849 | 4026.0  |
| weighted avg | 0.708492 | 0.723378  | 0.708849 | 4026.0  |

The result of Model Number:Dataset Number:Featuregroup Number:Rescale of 35 : 0 : 2 :  
1

|              | f1-score | precision | recall   | support |
|--------------|----------|-----------|----------|---------|
| AFIB         | 0.762457 | 0.759988  | 0.764965 | 875.0   |
| GSVT         | 0.771298 | 0.773695  | 0.768993 | 691.0   |
| SB           | 0.813845 | 0.812073  | 0.815627 | 1553.0  |
| SR           | 0.798837 | 0.802605  | 0.795133 | 907.0   |
| macro avg    | 0.786609 | 0.787090  | 0.786179 | 4026.0  |
| micro avg    | 0.791995 | 0.791995  | 0.791995 | 4026.0  |
| weighted avg | 0.791993 | 0.792033  | 0.791995 | 4026.0  |

The result of Model Number:Dataset Number:Featuregroup Number:Rescale of 35 : 0 : 3 :  
0

|              | f1-score | precision | recall   | support |
|--------------|----------|-----------|----------|---------|
| AFIB         | 0.728642 | 0.719340  | 0.738231 | 875.0   |
| GSVT         | 0.741432 | 0.745684  | 0.737248 | 691.0   |
| SB           | 0.793657 | 0.790324  | 0.797026 | 1553.0  |
| SR           | 0.770288 | 0.782756  | 0.758225 | 907.0   |
| macro avg    | 0.758505 | 0.759526  | 0.757682 | 4026.0  |
| micro avg    | 0.765246 | 0.765246  | 0.765246 | 4026.0  |
| weighted avg | 0.765298 | 0.765529  | 0.765246 | 4026.0  |

The result of Model Number:Dataset Number:Featuregroup Number:Rescale of 35 : 0 : 3 :  
1

|      | f1-score | precision | recall   | support |
|------|----------|-----------|----------|---------|
| AFIB | 0.807278 | 0.800856  | 0.813880 | 875.0   |



GSVT 0.775269 0.760529 0.790657 691.0  
SB 0.813673 0.751091 0.887646 1553.0  
SR 0.623047 0.796658 0.511681 907.0  
macro avg 0.754817 0.777283 0.750966 4026.0  
micro avg 0.770268 0.770268 0.770268 4026.0  
weighted avg 0.762747 0.773792 0.770268 4026.0  
The result of Model Number:Dataset Number:Featuregroup Number:Rescale of 35 : 0 : 4 :  
0

f1-score precision recall support  
AFIB 0.834236 0.878160 0.794720 204.0  
GSVT 0.876127 0.868453 0.883977 300.0  
SB 0.898861 0.893312 0.904496 892.0  
SR 0.886598 0.884799 0.888424 681.0  
macro avg 0.873955 0.881181 0.867904 2077.0  
micro avg 0.885480 0.885480 0.885480 2077.0  
weighted avg 0.885209 0.885442 0.885480 2077.0  
The result of Model Number:Dataset Number:Featuregroup Number:Rescale of 35 : 0 : 4 :  
1

f1-score precision recall support  
AFIB 0.785531 0.778167 0.793136 875.0  
GSVT 0.744759 0.726858 0.799507 691.0  
SB 0.861175 0.858012 0.864384 1553.0  
SR 0.669806 0.674503 0.665183 907.0  
macro avg 0.765318 0.759385 0.780553 4026.0  
micro avg 0.792887 0.792887 0.792887 4026.0  
weighted avg 0.781641 0.776806 0.792887 4026.0  
The result of Model Number:Dataset Number:Featuregroup Number:Rescale of 35 : 0 : 5 :  
0

f1-score precision recall support  
AFIB 0.688820 0.723236 0.657877 204.0  
GSVT 0.709587 0.696436 0.723490 300.0  
SB 0.725825 0.718509 0.733307 892.0  
SR 0.705695 0.711999 0.699567 681.0  
macro avg 0.707482 0.712545 0.703560 2077.0  
micro avg 0.713418 0.713418 0.713418 2077.0  
weighted avg 0.713245 0.713651 0.713418 2077.0  
The result of Model Number:Dataset Number:Featuregroup Number:Rescale of 35 : 0 : 5 :  
1

f1-score precision recall support  
AFIB 0.720425 0.718210 0.722700 875.0  
GSVT 0.702060 0.705503 0.698763 691.0  
SB 0.738063 0.707434 0.771470 1553.0  
SR 0.635164 0.693000 0.586288 907.0  
macro avg 0.698928 0.706037 0.694805 4026.0

micro avg 0.706673 0.706673 0.706673 4026.0  
weighted avg 0.704869 0.706193 0.706673 4026.0  
The result of Model Number:Dataset Number:Featuregroup Number:Rescale of 35 : 0 : 6 :  
0

|              | f1-score | precision | recall   | support |
|--------------|----------|-----------|----------|---------|
| AFIB         | 0.811746 | 0.825242  | 0.798871 | 204.0   |
| GSVT         | 0.827312 | 0.821434  | 0.833336 | 300.0   |
| SB           | 0.846501 | 0.841743  | 0.851331 | 892.0   |
| SR           | 0.835716 | 0.840829  | 0.830692 | 681.0   |
| macro avg    | 0.830319 | 0.832312  | 0.828557 | 2077.0  |
| micro avg    | 0.836812 | 0.836812  | 0.836812 | 2077.0  |
| weighted avg | 0.836780 | 0.836889  | 0.836812 | 2077.0  |

The result of Model Number:Dataset Number:Featuregroup Number:Rescale of 35 : 0 : 6 :  
1

|              | f1-score | precision | recall   | support |
|--------------|----------|-----------|----------|---------|
| AFIB         | 0.906920 | 0.947227  | 0.870029 | 204.0   |
| GSVT         | 0.944713 | 0.937297  | 0.952269 | 300.0   |
| SB           | 0.959144 | 0.951745  | 0.966668 | 892.0   |
| SR           | 0.948533 | 0.950099  | 0.947005 | 681.0   |
| macro avg    | 0.939828 | 0.946592  | 0.933993 | 2077.0  |
| micro avg    | 0.948649 | 0.948649  | 0.948649 | 2077.0  |
| weighted avg | 0.948451 | 0.948675  | 0.948649 | 2077.0  |

The result of Model Number:Dataset Number:Featuregroup Number:Rescale of 35 : 0 : 7 :  
0

|              | f1-score | precision | recall   | support |
|--------------|----------|-----------|----------|---------|
| AFIB         | 0.725906 | 0.805608  | 0.660730 | 204.0   |
| GSVT         | 0.847594 | 0.836998  | 0.858629 | 300.0   |
| SB           | 0.901798 | 0.897197  | 0.906448 | 892.0   |
| SR           | 0.880673 | 0.868360  | 0.893343 | 681.0   |
| macro avg    | 0.838993 | 0.852041  | 0.829788 | 2077.0  |
| micro avg    | 0.871110 | 0.871110  | 0.871110 | 2077.0  |
| weighted avg | 0.869767 | 0.870051  | 0.871110 | 2077.0  |

The result of Model Number:Dataset Number:Featuregroup Number:Rescale of 35 : 0 : 7 :  
1

|              | f1-score | precision | recall   | support |
|--------------|----------|-----------|----------|---------|
| AFIB         | 0.687132 | 0.766366  | 0.622837 | 204.0   |
| GSVT         | 0.810199 | 0.796097  | 0.824982 | 300.0   |
| SB           | 0.865042 | 0.861208  | 0.868920 | 892.0   |
| SR           | 0.844968 | 0.833414  | 0.856871 | 681.0   |
| macro avg    | 0.801835 | 0.814271  | 0.793403 | 2077.0  |
| micro avg    | 0.834453 | 0.834453  | 0.834453 | 2077.0  |
| weighted avg | 0.833065 | 0.833375  | 0.834453 | 2077.0  |

The result of Model Number:Dataset Number:Featuregroup Number:Rescale of 35 : 0 : 8 :  
0

f1-score precision recall support  
AFIB 0.775294 0.763407 0.787687 875.0  
GSVT 0.802028 0.809889 0.794476 691.0  
SB 0.853572 0.851578 0.855602 1553.0  
SR 0.832249 0.842801 0.821976 907.0  
macro avg 0.815786 0.816919 0.814935 4026.0  
micro avg 0.822775 0.822775 0.822775 4026.0  
weighted avg 0.822909 0.823283 0.822775 4026.0  
The result of Model Number:Dataset Number:Featuregroup Number:Rescale of 35 : 0 : 8 :  
1

f1-score precision recall support  
AFIB 0.653700 0.656940 0.650562 875.0  
GSVT 0.660209 0.661160 0.659360 691.0  
SB 0.694959 0.691734 0.698221 1553.0  
SR 0.682166 0.683874 0.680503 907.0  
macro avg 0.672758 0.673427 0.672162 4026.0  
micro avg 0.677202 0.677202 0.677202 4026.0  
weighted avg 0.677145 0.677154 0.677202 4026.0  
The result of Model Number:Dataset Number:Featuregroup Number:Rescale of 35 : 0 : 9 :  
0

f1-score precision recall support  
AFIB 0.719757 0.746533 0.695158 204.0  
GSVT 0.667908 0.698901 0.639608 300.0  
SB 0.699660 0.657459 0.747661 892.0  
SR 0.614436 0.657127 0.577026 681.0  
macro avg 0.675440 0.690005 0.664863 2077.0  
micro avg 0.670950 0.670950 0.670950 2077.0  
weighted avg 0.669104 0.672085 0.670950 2077.0  
The result of Model Number:Dataset Number:Featuregroup Number:Rescale of 35 : 0 : 9 :  
1

f1-score precision recall support  
AFIB 0.880825 0.913592 0.850721 204.0  
GSVT 0.817372 0.855302 0.782739 300.0  
SB 0.856230 0.804586 0.914973 892.0  
SR 0.751935 0.804179 0.706153 681.0  
macro avg 0.826590 0.844415 0.813647 2077.0  
micro avg 0.821096 0.821096 0.821096 2077.0  
weighted avg 0.818837 0.822484 0.821096 2077.0  
The result of Model Number:Dataset Number:Featuregroup Number:Rescale of 35 : 0 :  
10 : 0

f1-score precision recall support  
AFIB 0.777735 0.754489 0.829268 875.0  
GSVT 0.666015 0.651430 0.681514 691.0  
SB 0.883389 0.876192 0.890941 1553.0

SR 0.828746 0.863541 0.798202 907.0  
macro avg 0.788971 0.786413 0.799981 4026.0  
micro avg 0.820699 0.820699 0.820699 4026.0  
weighted avg 0.810807 0.808314 0.820699 4026.0  
The result of Model Number:Dataset Number:Featuregroup Number:Rescale of 35 : 0 :  
10 : 1

f1-score precision recall support  
AFIB 0.613021 0.676032 0.561131 204.0  
GSVT 0.729477 0.719619 0.739681 300.0  
SB 0.776841 0.773734 0.779976 892.0  
SR 0.755756 0.745540 0.766289 681.0  
macro avg 0.718774 0.728731 0.711769 2077.0  
micro avg 0.748174 0.748174 0.748174 2077.0  
weighted avg 0.746996 0.747078 0.748174 2077.0

The result of Model Number:Dataset Number:Featuregroup Number:Rescale of 35 : 1 : 0 :  
0

f1-score precision recall support  
AFIB 0.812711 0.846909 0.781242 204.0  
GSVT 0.839979 0.827122 0.853369 300.0  
SB 0.860239 0.854069 0.866508 892.0  
SR 0.837912 0.842173 0.833726 681.0  
macro avg 0.837710 0.842568 0.833711 2077.0  
micro avg 0.845487 0.845487 0.845487 2077.0  
weighted avg 0.845324 0.845573 0.845487 2077.0

The result of Model Number:Dataset Number:Featuregroup Number:Rescale of 35 : 1 : 0 :  
1

f1-score precision recall support  
AFIB 0.879647 0.879882 0.879566 875.0  
GSVT 0.894965 0.891661 0.898406 691.0  
SB 0.957438 0.955114 0.959778 1553.0  
SR 0.934604 0.941312 0.928017 907.0  
macro avg 0.916664 0.916992 0.916442 4026.0  
micro avg 0.924656 0.924656 0.924656 4026.0  
weighted avg 0.924664 0.924763 0.924656 4026.0

The result of Model Number:Dataset Number:Featuregroup Number:Rescale of 35 : 1 : 1 :  
0

f1-score precision recall support  
AFIB 0.862636 0.876978 0.848954 204.0  
GSVT 0.879177 0.872931 0.885579 300.0  
SB 0.899570 0.894514 0.904703 892.0  
SR 0.888109 0.893543 0.882770 681.0  
macro avg 0.882373 0.884491 0.880501 2077.0  
micro avg 0.889274 0.889274 0.889274 2077.0  
weighted avg 0.889239 0.889356 0.889274 2077.0

The result of Model Number:Dataset Number:Featuregroup Number:Rescale of 35 : 1 : 1 : 1

|              | f1-score | precision | recall   | support |
|--------------|----------|-----------|----------|---------|
| AFIB         | 0.762951 | 0.741790  | 0.787757 | 875.0   |
| GSVT         | 0.772911 | 0.805467  | 0.747640 | 691.0   |
| SB           | 0.849070 | 0.848641  | 0.849510 | 1553.0  |
| SR           | 0.827769 | 0.832949  | 0.822659 | 907.0   |
| macro avg    | 0.803175 | 0.807212  | 0.801892 | 4026.0  |
| micro avg    | 0.812555 | 0.812555  | 0.812555 | 4026.0  |
| weighted avg | 0.812483 | 0.814473  | 0.812555 | 4026.0  |

The result of Model Number:Dataset Number:Featuregroup Number:Rescale of 35 : 1 : 2 : 0

|              | f1-score | precision | recall   | support |
|--------------|----------|-----------|----------|---------|
| AFIB         | 0.678947 | 0.668799  | 0.689432 | 875.0   |
| GSVT         | 0.691964 | 0.697882  | 0.686157 | 691.0   |
| SB           | 0.739348 | 0.736802  | 0.741916 | 1553.0  |
| SR           | 0.717707 | 0.728412  | 0.707337 | 907.0   |
| macro avg    | 0.706992 | 0.707974  | 0.706211 | 4026.0  |
| micro avg    | 0.713149 | 0.713149  | 0.713149 | 4026.0  |
| weighted avg | 0.713212 | 0.713452  | 0.713149 | 4026.0  |

The result of Model Number:Dataset Number:Featuregroup Number:Rescale of 35 : 1 : 2 : 1

|              | f1-score | precision | recall   | support |
|--------------|----------|-----------|----------|---------|
| AFIB         | 0.793531 | 0.795607  | 0.791622 | 204.0   |
| GSVT         | 0.811435 | 0.808294  | 0.814669 | 300.0   |
| SB           | 0.829633 | 0.828526  | 0.830748 | 892.0   |
| SR           | 0.822989 | 0.825301  | 0.820693 | 681.0   |
| macro avg    | 0.814397 | 0.814432  | 0.814433 | 2077.0  |
| micro avg    | 0.821286 | 0.821286  | 0.821286 | 2077.0  |
| weighted avg | 0.821280 | 0.821313  | 0.821286 | 2077.0  |

The result of Model Number:Dataset Number:Featuregroup Number:Rescale of 35 : 1 : 3 : 0

|              | f1-score | precision | recall   | support |
|--------------|----------|-----------|----------|---------|
| AFIB         | 0.763787 | 0.779379  | 0.749144 | 204.0   |
| GSVT         | 0.791521 | 0.784644  | 0.798664 | 300.0   |
| SB           | 0.806739 | 0.805299  | 0.808186 | 892.0   |
| SR           | 0.799230 | 0.799707  | 0.798759 | 681.0   |
| macro avg    | 0.790319 | 0.792257  | 0.788689 | 2077.0  |
| micro avg    | 0.797921 | 0.797921  | 0.797921 | 2077.0  |
| weighted avg | 0.797860 | 0.797936  | 0.797921 | 2077.0  |

The result of Model Number:Dataset Number:Featuregroup Number:Rescale of 35 : 1 : 3 : 1

|      | f1-score | precision | recall   | support |
|------|----------|-----------|----------|---------|
| AFIB | 0.653083 | 0.645237  | 0.661147 | 875.0   |

GSVT 0.665644 0.671034 0.660345 691.0  
SB 0.709525 0.706809 0.712265 1553.0  
SR 0.692889 0.701749 0.684259 907.0  
macro avg 0.680285 0.681207 0.679504 4026.0  
micro avg 0.685934 0.685934 0.685934 4026.0  
weighted avg 0.685979 0.686147 0.685934 4026.0  
The result of Model Number:Dataset Number:Featuregroup Number:Rescale of 35 : 1 : 4 :  
0

f1-score precision recall support

AFIB 0.687701 0.671527 0.723999 875.0  
GSVT 0.660819 0.654726 0.675877 691.0  
SB 0.716703 0.666238 0.776264 1553.0  
SR 0.446873 0.560451 0.372147 907.0  
macro avg 0.628024 0.638236 0.637072 4026.0  
micro avg 0.656633 0.656633 0.656633 4026.0  
weighted avg 0.640019 0.641580 0.656633 4026.0  
The result of Model Number:Dataset Number:Featuregroup Number:Rescale of 35 : 1 : 4 :  
1

f1-score precision recall support

AFIB 0.855162 0.845184 0.867607 875.0  
GSVT 0.879910 0.869244 0.891549 691.0  
SB 0.893172 0.858696 0.943743 1553.0  
SR 0.709225 0.746636 0.675427 907.0  
macro avg 0.834367 0.829940 0.844582 4026.0  
micro avg 0.857790 0.857790 0.857790 4026.0  
weighted avg 0.841194 0.832324 0.857790 4026.0  
The result of Model Number:Dataset Number:Featuregroup Number:Rescale of 35 : 1 : 5 :  
0

f1-score precision recall support

AFIB 0.886039 0.895680 0.876861 204.0  
GSVT 0.916023 0.912203 0.920024 300.0  
SB 0.934794 0.933958 0.935632 892.0  
SR 0.925960 0.925968 0.925960 681.0  
macro avg 0.915704 0.916952 0.914619 2077.0  
micro avg 0.924434 0.924434 0.924434 2077.0  
weighted avg 0.924398 0.924436 0.924434 2077.0  
The result of Model Number:Dataset Number:Featuregroup Number:Rescale of 35 : 1 : 5 :  
1

f1-score precision recall support

AFIB 0.667370 0.719386 0.622679 204.0  
GSVT 0.687722 0.699363 0.676491 300.0  
SB 0.728856 0.722148 0.735712 892.0  
SR 0.699846 0.689698 0.710330 681.0  
macro avg 0.695948 0.707649 0.686303 2077.0

micro avg 0.707734 0.707734 0.707734 2077.0  
weighted avg 0.707364 0.707946 0.707734 2077.0  
The result of Model Number:Dataset Number:Featuregroup Number:Rescale of 35 : 1 : 6 :  
0

|              | f1-score | precision | recall   | support |
|--------------|----------|-----------|----------|---------|
| AFIB         | 0.667362 | 0.659491  | 0.675457 | 875.0   |
| GSVT         | 0.678667 | 0.682961  | 0.674451 | 691.0   |
| SB           | 0.723590 | 0.722617  | 0.724568 | 1553.0  |
| SR           | 0.705814 | 0.712500  | 0.699275 | 907.0   |
| macro avg    | 0.693858 | 0.694392  | 0.693438 | 4026.0  |
| micro avg    | 0.699595 | 0.699595  | 0.699595 | 4026.0  |
| weighted avg | 0.699655 | 0.699812  | 0.699595 | 4026.0  |

The result of Model Number:Dataset Number:Featuregroup Number:Rescale of 35 : 1 : 6 :  
1

|              | f1-score | precision | recall   | support |
|--------------|----------|-----------|----------|---------|
| AFIB         | 0.878260 | 0.910684  | 0.848147 | 204.0   |
| GSVT         | 0.897032 | 0.887825  | 0.906570 | 300.0   |
| SB           | 0.921601 | 0.917303  | 0.925940 | 892.0   |
| SR           | 0.907231 | 0.907799  | 0.906693 | 681.0   |
| macro avg    | 0.901031 | 0.905903  | 0.896837 | 2077.0  |
| micro avg    | 0.909191 | 0.909191  | 0.909191 | 2077.0  |
| weighted avg | 0.909083 | 0.909279  | 0.909191 | 2077.0  |

The result of Model Number:Dataset Number:Featuregroup Number:Rescale of 35 : 1 : 7 :  
0

|              | f1-score | precision | recall   | support |
|--------------|----------|-----------|----------|---------|
| AFIB         | 0.809073 | 0.823916  | 0.794818 | 204.0   |
| GSVT         | 0.819744 | 0.811471  | 0.828204 | 300.0   |
| SB           | 0.839936 | 0.835564  | 0.844360 | 892.0   |
| SR           | 0.828501 | 0.833693  | 0.823392 | 681.0   |
| macro avg    | 0.824314 | 0.826161  | 0.822693 | 2077.0  |
| micro avg    | 0.830285 | 0.830285  | 0.830285 | 2077.0  |
| weighted avg | 0.830239 | 0.830326  | 0.830285 | 2077.0  |

The result of Model Number:Dataset Number:Featuregroup Number:Rescale of 35 : 1 : 7 :  
1

|              | f1-score | precision | recall   | support |
|--------------|----------|-----------|----------|---------|
| AFIB         | 0.764792 | 0.765652  | 0.764073 | 204.0   |
| GSVT         | 0.782351 | 0.780604  | 0.784165 | 300.0   |
| SB           | 0.798934 | 0.797867  | 0.800007 | 892.0   |
| SR           | 0.792950 | 0.794947  | 0.790973 | 681.0   |
| macro avg    | 0.784757 | 0.784768  | 0.784805 | 2077.0  |
| micro avg    | 0.791227 | 0.791227  | 0.791227 | 2077.0  |
| weighted avg | 0.791223 | 0.791252  | 0.791227 | 2077.0  |

The result of Model Number:Dataset Number:Featuregroup Number:Rescale of 35 : 1 : 8 :  
0

f1-score precision recall support  
AFIB 0.824026 0.817681 0.830533 875.0  
GSVT 0.834725 0.838600 0.831067 691.0  
SB 0.894524 0.889765 0.899353 1553.0  
SR 0.868168 0.880374 0.856391 907.0  
macro avg 0.855361 0.856605 0.854336 4026.0  
micro avg 0.862997 0.862997 0.862997 4026.0  
weighted avg 0.863001 0.863201 0.862997 4026.0  
The result of Model Number:Dataset Number:Featuregroup Number:Rescale of 35 : 1 : 8 :  
1

f1-score precision recall support  
AFIB 0.659647 0.657819 0.661535 875.0  
GSVT 0.664867 0.668038 0.661792 691.0  
SB 0.695999 0.693775 0.698240 1553.0  
SR 0.684872 0.688180 0.681627 907.0  
macro avg 0.676346 0.676953 0.675799 4026.0  
micro avg 0.680264 0.680264 0.680264 4026.0  
weighted avg 0.680248 0.680283 0.680264 4026.0  
The result of Model Number:Dataset Number:Featuregroup Number:Rescale of 35 : 1 : 9 :  
0

f1-score precision recall support  
AFIB 0.872385 0.879086 0.865983 204.0  
GSVT 0.903106 0.902241 0.904003 300.0  
SB 0.921583 0.919436 0.923749 892.0  
SR 0.913101 0.914332 0.911894 681.0  
macro avg 0.902544 0.903774 0.901407 2077.0  
micro avg 0.911336 0.911336 0.911336 2077.0  
weighted avg 0.911301 0.911316 0.911336 2077.0  
The result of Model Number:Dataset Number:Featuregroup Number:Rescale of 35 : 1 : 9 :  
1

f1-score precision recall support  
AFIB 0.891545 0.881694 0.901636 875.0  
GSVT 0.907608 0.913196 0.902103 691.0  
SB 0.965975 0.964367 0.967592 1553.0  
SR 0.942454 0.951266 0.933827 907.0  
macro avg 0.926895 0.927631 0.926290 4026.0  
micro avg 0.934410 0.934410 0.934410 4026.0  
weighted avg 0.934482 0.934665 0.934410 4026.0  
The result of Model Number:Dataset Number:Featuregroup Number:Rescale of 35 : 1 :  
10 : 0

f1-score precision recall support  
AFIB 0.721560 0.727579 0.715889 204.0  
GSVT 0.740622 0.737211 0.744080 300.0  
SB 0.751791 0.749120 0.754485 892.0



SR 0.744847 0.748183 0.741579 681.0  
macro avg 0.739705 0.740523 0.739008 2077.0  
micro avg 0.744960 0.744960 0.744960 2077.0  
weighted avg 0.744932 0.744977 0.744960 2077.0  
The result of Model Number:Dataset Number:Featuregroup Number:Rescale of 35 : 1 :  
10 : 1

f1-score precision recall support  
AFIB 0.632150 0.689402 0.584731 204.0  
GSVT 0.733725 0.725341 0.742531 300.0  
SB 0.778072 0.776080 0.780078 892.0  
SR 0.759022 0.748743 0.769608 681.0  
macro avg 0.725742 0.734892 0.719237 2077.0  
micro avg 0.752035 0.752035 0.752035 2077.0  
weighted avg 0.751088 0.751275 0.752035 2077.0

The result of Model Number:Dataset Number:Featuregroup Number:Rescale of 36 : 0 : 0 :  
0

f1-score precision recall support  
AFIB 0.889477 0.920356 0.860723 204.0  
GSVT 0.906532 0.896608 0.916790 300.0  
SB 0.930665 0.923982 0.937447 892.0  
SR 0.914044 0.918538 0.909609 681.0  
macro avg 0.910179 0.914871 0.906142 2077.0  
micro avg 0.917800 0.917800 0.917800 2077.0  
weighted avg 0.917684 0.917887 0.917800 2077.0

The result of Model Number:Dataset Number:Featuregroup Number:Rescale of 36 : 0 : 0 :  
1

f1-score precision recall support  
AFIB 0.874279 0.880522 0.868282 204.0  
GSVT 0.904850 0.904267 0.905452 300.0  
SB 0.922955 0.920907 0.925021 892.0  
SR 0.914705 0.915811 0.913629 681.0  
macro avg 0.904197 0.905377 0.903096 2077.0  
micro avg 0.912886 0.912886 0.912886 2077.0  
weighted avg 0.912854 0.912866 0.912886 2077.0

The result of Model Number:Dataset Number:Featuregroup Number:Rescale of 36 : 0 : 1 :  
0

f1-score precision recall support  
AFIB 0.685898 0.676398 0.695697 875.0  
GSVT 0.701111 0.706785 0.695531 691.0  
SB 0.744221 0.742083 0.746377 1553.0  
SR 0.726117 0.735567 0.716913 907.0  
macro avg 0.714337 0.715208 0.713629 4026.0  
micro avg 0.719997 0.719997 0.719997 4026.0  
weighted avg 0.720067 0.720281 0.719997 4026.0

The result of Model Number:Dataset Number:Featuregroup Number:Rescale of 36 : 0 : 1 :  
1

|              | f1-score | precision | recall   | support |
|--------------|----------|-----------|----------|---------|
| AFIB         | 0.658275 | 0.657488  | 0.659176 | 875.0   |
| GSVT         | 0.671107 | 0.673416  | 0.668884 | 691.0   |
| SB           | 0.710802 | 0.706424  | 0.715241 | 1553.0  |
| SR           | 0.696338 | 0.703139  | 0.689744 | 907.0   |
| macro avg    | 0.684131 | 0.685116  | 0.683261 | 4026.0  |
| micro avg    | 0.689355 | 0.689355  | 0.689355 | 4026.0  |
| weighted avg | 0.689314 | 0.689383  | 0.689355 | 4026.0  |

The result of Model Number:Dataset Number:Featuregroup Number:Rescale of 36 : 0 : 2 :  
0

|              | f1-score | precision | recall   | support |
|--------------|----------|-----------|----------|---------|
| AFIB         | 0.773862 | 0.757325  | 0.791182 | 875.0   |
| GSVT         | 0.801383 | 0.813638  | 0.789564 | 691.0   |
| SB           | 0.854273 | 0.854386  | 0.854163 | 1553.0  |
| SR           | 0.832265 | 0.840883  | 0.823824 | 907.0   |
| macro avg    | 0.815446 | 0.816558  | 0.814683 | 4026.0  |
| micro avg    | 0.822553 | 0.822553  | 0.822553 | 4026.0  |
| weighted avg | 0.822761 | 0.823255  | 0.822553 | 4026.0  |

The result of Model Number:Dataset Number:Featuregroup Number:Rescale of 36 : 0 : 2 :  
1

|              | f1-score | precision | recall   | support |
|--------------|----------|-----------|----------|---------|
| AFIB         | 0.865326 | 0.873112  | 0.857949 | 875.0   |
| GSVT         | 0.882953 | 0.865050  | 0.901821 | 691.0   |
| SB           | 0.936377 | 0.925960  | 0.947144 | 1553.0  |
| SR           | 0.899220 | 0.925950  | 0.874202 | 907.0   |
| macro avg    | 0.895969 | 0.897518  | 0.895279 | 4026.0  |
| micro avg    | 0.903547 | 0.903547  | 0.903547 | 4026.0  |
| weighted avg | 0.903395 | 0.904018  | 0.903547 | 4026.0  |

The result of Model Number:Dataset Number:Featuregroup Number:Rescale of 36 : 0 : 3 :  
0

|              | f1-score | precision | recall   | support |
|--------------|----------|-----------|----------|---------|
| AFIB         | 0.857867 | 0.876978  | 0.839818 | 204.0   |
| GSVT         | 0.868451 | 0.855731  | 0.881916 | 300.0   |
| SB           | 0.888076 | 0.879250  | 0.897119 | 892.0   |
| SR           | 0.871694 | 0.884214  | 0.859550 | 681.0   |
| macro avg    | 0.871522 | 0.874043  | 0.869601 | 2077.0  |
| micro avg    | 0.876977 | 0.876977  | 0.876977 | 2077.0  |
| weighted avg | 0.876903 | 0.877257  | 0.876977 | 2077.0  |

The result of Model Number:Dataset Number:Featuregroup Number:Rescale of 36 : 0 : 3 :  
1

|      | f1-score | precision | recall   | support |
|------|----------|-----------|----------|---------|
| AFIB | 0.874814 | 0.881061  | 0.868813 | 204.0   |

GSVT 0.905404 0.904820 0.906006 300.0  
SB 0.923519 0.921470 0.925587 892.0  
SR 0.915264 0.916371 0.914187 681.0  
macro avg 0.904750 0.905931 0.903648 2077.0  
micro avg 0.913445 0.913445 0.913445 2077.0  
weighted avg 0.913412 0.913424 0.913445 2077.0  
The result of Model Number:Dataset Number:Featuregroup Number:Rescale of 36 : 0 : 4 :  
0

f1-score precision recall support  
AFIB 0.694505 0.705510 0.683930 204.0  
GSVT 0.712356 0.706294 0.718527 300.0  
SB 0.724655 0.723040 0.726280 892.0  
SR 0.717789 0.719385 0.716214 681.0  
macro avg 0.712326 0.713557 0.711238 2077.0  
micro avg 0.717700 0.717700 0.717700 2077.0  
weighted avg 0.717666 0.717701 0.717700 2077.0  
The result of Model Number:Dataset Number:Featuregroup Number:Rescale of 36 : 0 : 4 :  
1

f1-score precision recall support  
AFIB 0.908460 0.926601 0.891154 204.0  
GSVT 0.918662 0.907183 0.930574 300.0  
SB 0.936201 0.927249 0.945329 892.0  
SR 0.919199 0.931257 0.907474 681.0  
macro avg 0.920630 0.923073 0.918632 2077.0  
micro avg 0.925465 0.925465 0.925465 2077.0  
weighted avg 0.925368 0.925602 0.925465 2077.0  
The result of Model Number:Dataset Number:Featuregroup Number:Rescale of 36 : 0 : 5 :  
0

f1-score precision recall support  
AFIB 0.644317 0.646393 0.642315 875.0  
GSVT 0.653376 0.643002 0.664148 691.0  
SB 0.688437 0.682689 0.694288 1553.0  
SR 0.653832 0.670437 0.638053 907.0  
macro avg 0.659990 0.660630 0.659701 4026.0  
micro avg 0.665150 0.665150 0.665150 4026.0  
weighted avg 0.665034 0.665229 0.665150 4026.0  
The result of Model Number:Dataset Number:Featuregroup Number:Rescale of 36 : 0 : 5 :  
1

f1-score precision recall support  
AFIB 0.697547 0.703985 0.691264 875.0  
GSVT 0.713835 0.711908 0.715798 691.0  
SB 0.760245 0.753099 0.767535 1553.0  
SR 0.739240 0.746657 0.731983 907.0  
macro avg 0.727717 0.728912 0.726645 4026.0

micro avg 0.734069 0.734069 0.734069 4026.0  
weighted avg 0.733921 0.733903 0.734069 4026.0  
The result of Model Number:Dataset Number:Featuregroup Number:Rescale of 36 : 0 : 6 :  
0

|              | f1-score | precision | recall   | support |
|--------------|----------|-----------|----------|---------|
| AFIB         | 0.796841 | 0.812417  | 0.781991 | 204.0   |
| GSVT         | 0.818737 | 0.812838  | 0.824750 | 300.0   |
| SB           | 0.833390 | 0.830147  | 0.836660 | 892.0   |
| SR           | 0.824280 | 0.826613  | 0.821979 | 681.0   |
| macro avg    | 0.818312 | 0.820504  | 0.816345 | 2077.0  |
| micro avg    | 0.824756 | 0.824756  | 0.824756 | 2077.0  |
| weighted avg | 0.824697 | 0.824747  | 0.824756 | 2077.0  |

The result of Model Number:Dataset Number:Featuregroup Number:Rescale of 36 : 0 : 6 :  
1

|              | f1-score | precision | recall   | support |
|--------------|----------|-----------|----------|---------|
| AFIB         | 0.756304 | 0.779682  | 0.734946 | 204.0   |
| GSVT         | 0.706000 | 0.721348  | 0.691812 | 300.0   |
| SB           | 0.744651 | 0.711602  | 0.780957 | 892.0   |
| SR           | 0.670477 | 0.704930  | 0.639329 | 681.0   |
| macro avg    | 0.719358 | 0.729391  | 0.711761 | 2077.0  |
| micro avg    | 0.717125 | 0.717125  | 0.717125 | 2077.0  |
| weighted avg | 0.715893 | 0.717509  | 0.717125 | 2077.0  |

The result of Model Number:Dataset Number:Featuregroup Number:Rescale of 36 : 0 : 7 :  
0

|              | f1-score | precision | recall   | support |
|--------------|----------|-----------|----------|---------|
| AFIB         | 0.791877 | 0.811144  | 0.773699 | 204.0   |
| GSVT         | 0.801831 | 0.790793  | 0.813289 | 300.0   |
| SB           | 0.818022 | 0.809853  | 0.826363 | 892.0   |
| SR           | 0.803740 | 0.814287  | 0.793485 | 681.0   |
| macro avg    | 0.803868 | 0.806519  | 0.801709 | 2077.0  |
| micro avg    | 0.808522 | 0.808522  | 0.808522 | 2077.0  |
| weighted avg | 0.808433 | 0.808681  | 0.808522 | 2077.0  |

The result of Model Number:Dataset Number:Featuregroup Number:Rescale of 36 : 0 : 7 :  
1

|              | f1-score | precision | recall   | support |
|--------------|----------|-----------|----------|---------|
| AFIB         | 0.679832 | 0.692879  | 0.667306 | 875.0   |
| GSVT         | 0.724680 | 0.725785  | 0.723623 | 691.0   |
| SB           | 0.789083 | 0.785616  | 0.792587 | 1553.0  |
| SR           | 0.745659 | 0.737553  | 0.754022 | 907.0   |
| macro avg    | 0.734814 | 0.735458  | 0.734385 | 4026.0  |
| micro avg    | 0.744834 | 0.744834  | 0.744834 | 4026.0  |
| weighted avg | 0.744502 | 0.744364  | 0.744834 | 4026.0  |

The result of Model Number:Dataset Number:Featuregroup Number:Rescale of 36 : 0 : 8 :  
0

f1-score precision recall support  
AFIB 0.791375 0.810173 0.773501 204.0  
GSVT 0.817369 0.809705 0.825265 300.0  
SB 0.834923 0.833989 0.835859 892.0  
SR 0.826864 0.826033 0.827710 681.0  
macro avg 0.817633 0.819975 0.815584 2077.0  
micro avg 0.825533 0.825533 0.825533 2077.0  
weighted avg 0.825468 0.825534 0.825533 2077.0  
The result of Model Number:Dataset Number:Featuregroup Number:Rescale of 36 : 0 : 8 :  
1

f1-score precision recall support  
AFIB 0.717490 0.716689 0.718315 875.0  
GSVT 0.730614 0.721476 0.740008 691.0  
SB 0.767506 0.761336 0.773783 1553.0  
SR 0.733264 0.752503 0.714996 907.0  
macro avg 0.737219 0.738001 0.736776 4026.0  
micro avg 0.742687 0.742687 0.742687 4026.0  
weighted avg 0.742590 0.742801 0.742687 4026.0  
The result of Model Number:Dataset Number:Featuregroup Number:Rescale of 36 : 0 : 9 :  
0

f1-score precision recall support  
AFIB 0.856950 0.903566 0.815127 204.0  
GSVT 0.899639 0.886033 0.913706 300.0  
SB 0.921018 0.915027 0.927102 892.0  
SR 0.909655 0.910475 0.908858 681.0  
macro avg 0.896816 0.903775 0.891198 2077.0  
micro avg 0.908187 0.908187 0.908187 2077.0  
weighted avg 0.907912 0.908221 0.908187 2077.0  
The result of Model Number:Dataset Number:Featuregroup Number:Rescale of 36 : 0 : 9 :  
1

f1-score precision recall support  
AFIB 0.647899 0.674950 0.623051 875.0  
GSVT 0.699957 0.696414 0.703622 691.0  
SB 0.767525 0.763205 0.771914 1553.0  
SR 0.718671 0.702713 0.735383 907.0  
macro avg 0.708513 0.709320 0.708493 4026.0  
micro avg 0.719609 0.719609 0.719609 4026.0  
weighted avg 0.718923 0.718932 0.719609 4026.0  
The result of Model Number:Dataset Number:Featuregroup Number:Rescale of 36 : 0 :  
10 : 0

f1-score precision recall support  
AFIB 0.664713 0.668204 0.661297 875.0  
GSVT 0.675930 0.677185 0.674765 691.0  
SB 0.715902 0.710819 0.721064 1553.0

SR 0.702176 0.706503 0.697919 907.0  
macro avg 0.689680 0.690678 0.688761 4026.0  
micro avg 0.694914 0.694914 0.694914 4026.0  
weighted avg 0.694824 0.694812 0.694914 4026.0  
The result of Model Number:Dataset Number:Featuregroup Number:Rescale of 36 : 0 :  
10 : 1

f1-score precision recall support  
AFIB 0.787638 0.830484 0.749198 204.0  
GSVT 0.826875 0.814369 0.839804 300.0  
SB 0.846524 0.841018 0.852117 892.0  
SR 0.836080 0.836834 0.835348 681.0  
macro avg 0.824279 0.830676 0.819117 2077.0  
micro avg 0.834732 0.834732 0.834732 2077.0  
weighted avg 0.834478 0.834762 0.834732 2077.0

The result of Model Number:Dataset Number:Featuregroup Number:Rescale of 36 : 1 : 0 :  
0

f1-score precision recall support  
AFIB 0.773965 0.768006 0.780077 875.0  
GSVT 0.784014 0.787654 0.780578 691.0  
SB 0.840180 0.835710 0.844715 1553.0  
SR 0.815425 0.826890 0.804364 907.0  
macro avg 0.803396 0.804565 0.802434 4026.0  
micro avg 0.810568 0.810568 0.810568 4026.0  
weighted avg 0.810572 0.810760 0.810568 4026.0

The result of Model Number:Dataset Number:Featuregroup Number:Rescale of 36 : 1 : 0 :  
1

f1-score precision recall support  
AFIB 0.860664 0.853770 0.867771 875.0  
GSVT 0.884433 0.885942 0.883032 691.0  
SB 0.937639 0.935126 0.940173 1553.0  
SR 0.912020 0.922637 0.901664 907.0  
macro avg 0.898689 0.899369 0.898160 4026.0  
micro avg 0.905955 0.905955 0.905955 4026.0  
weighted avg 0.906006 0.906189 0.905955 4026.0

The result of Model Number:Dataset Number:Featuregroup Number:Rescale of 36 : 1 : 1 :  
0

f1-score precision recall support  
AFIB 0.852347 0.853689 0.851120 204.0  
GSVT 0.872961 0.871598 0.874400 300.0  
SB 0.890969 0.889882 0.892065 892.0  
SR 0.884730 0.886427 0.883042 681.0  
macro avg 0.875252 0.875399 0.875157 2077.0  
micro avg 0.882534 0.882534 0.882534 2077.0  
weighted avg 0.882529 0.882554 0.882534 2077.0

The result of Model Number:Dataset Number:Featuregroup Number:Rescale of 36 : 1 : 1 :  
1

|              | f1-score | precision | recall   | support |
|--------------|----------|-----------|----------|---------|
| AFIB         | 0.925576 | 0.942556  | 0.909268 | 204.0   |
| GSVT         | 0.937783 | 0.928319  | 0.947461 | 300.0   |
| SB           | 0.960883 | 0.955882  | 0.965944 | 892.0   |
| SR           | 0.947802 | 0.953741  | 0.941957 | 681.0   |
| macro avg    | 0.943011 | 0.945124  | 0.941158 | 2077.0  |
| micro avg    | 0.949843 | 0.949843  | 0.949843 | 2077.0  |
| weighted avg | 0.949790 | 0.949890  | 0.949843 | 2077.0  |

The result of Model Number:Dataset Number:Featuregroup Number:Rescale of 36 : 1 : 2 :  
0

|              | f1-score | precision | recall   | support |
|--------------|----------|-----------|----------|---------|
| AFIB         | 0.819326 | 0.825940  | 0.812887 | 204.0   |
| GSVT         | 0.838126 | 0.834016  | 0.842305 | 300.0   |
| SB           | 0.854483 | 0.853536  | 0.855441 | 892.0   |
| SR           | 0.848103 | 0.849231  | 0.846984 | 681.0   |
| macro avg    | 0.840009 | 0.840681  | 0.839404 | 2077.0  |
| micro avg    | 0.846591 | 0.846591  | 0.846591 | 2077.0  |
| weighted avg | 0.846576 | 0.846594  | 0.846591 | 2077.0  |

The result of Model Number:Dataset Number:Featuregroup Number:Rescale of 36 : 1 : 2 :  
1

|              | f1-score | precision | recall   | support |
|--------------|----------|-----------|----------|---------|
| AFIB         | 0.773644 | 0.777478  | 0.769930 | 875.0   |
| GSVT         | 0.781347 | 0.782473  | 0.780343 | 691.0   |
| SB           | 0.822473 | 0.818657  | 0.826334 | 1553.0  |
| SR           | 0.807333 | 0.809354  | 0.805365 | 907.0   |
| macro avg    | 0.796199 | 0.796990  | 0.795493 | 4026.0  |
| micro avg    | 0.801458 | 0.801458  | 0.801458 | 4026.0  |
| weighted avg | 0.801391 | 0.801401  | 0.801458 | 4026.0  |

The result of Model Number:Dataset Number:Featuregroup Number:Rescale of 36 : 1 : 3 :  
0

|              | f1-score | precision | recall   | support |
|--------------|----------|-----------|----------|---------|
| AFIB         | 0.733324 | 0.803907  | 0.674386 | 204.0   |
| GSVT         | 0.852858 | 0.844095  | 0.861965 | 300.0   |
| SB           | 0.904095 | 0.900579  | 0.907641 | 892.0   |
| SR           | 0.883148 | 0.870935  | 0.895723 | 681.0   |
| macro avg    | 0.843356 | 0.854879  | 0.834929 | 2077.0  |
| micro avg    | 0.874226 | 0.874226  | 0.874226 | 2077.0  |
| weighted avg | 0.873053 | 0.873206  | 0.874226 | 2077.0  |

The result of Model Number:Dataset Number:Featuregroup Number:Rescale of 36 : 1 : 3 :  
1

|      | f1-score | precision | recall   | support |
|------|----------|-----------|----------|---------|
| AFIB | 0.664996 | 0.667483  | 0.662810 | 875.0   |

GSVT 0.679964 0.686524 0.673665 691.0  
SB 0.723015 0.715431 0.730816 1553.0  
SR 0.697978 0.704121 0.692181 907.0  
macro avg 0.691488 0.693390 0.689868 4026.0  
micro avg 0.697523 0.697523 0.697523 4026.0  
weighted avg 0.697376 0.697501 0.697523 4026.0  
The result of Model Number:Dataset Number:Featuregroup Number:Rescale of 36 : 1 : 4 :  
0

f1-score precision recall support  
AFIB 0.602722 0.656571 0.636487 204.0  
GSVT 0.818663 0.805280 0.832781 300.0  
SB 0.696935 0.691627 0.702378 892.0  
SR 0.852238 0.842595 0.862130 681.0  
macro avg 0.742639 0.749018 0.758444 2077.0  
micro avg 0.767120 0.767120 0.767120 2077.0  
weighted avg 0.756184 0.754099 0.767120 2077.0  
The result of Model Number:Dataset Number:Featuregroup Number:Rescale of 36 : 1 : 4 :  
1

f1-score precision recall support  
AFIB 0.690155 0.705155 0.675969 204.0  
GSVT 0.718644 0.714405 0.722954 300.0  
SB 0.734084 0.732455 0.735727 892.0  
SR 0.726724 0.726314 0.727153 681.0  
macro avg 0.717402 0.719582 0.715451 2077.0  
micro avg 0.725202 0.725202 0.725202 2077.0  
weighted avg 0.725126 0.725153 0.725202 2077.0  
The result of Model Number:Dataset Number:Featuregroup Number:Rescale of 36 : 1 : 5 :  
0

f1-score precision recall support  
AFIB 0.814512 0.867582 0.767920 204.0  
GSVT 0.850194 0.829296 0.872288 300.0  
SB 0.875128 0.863886 0.886697 892.0  
SR 0.852398 0.862576 0.842513 681.0  
macro avg 0.848058 0.855835 0.842355 2077.0  
micro avg 0.858463 0.858463 0.858463 2077.0  
weighted avg 0.858120 0.858823 0.858463 2077.0  
The result of Model Number:Dataset Number:Featuregroup Number:Rescale of 36 : 1 : 5 :  
1

f1-score precision recall support  
AFIB 0.718568 0.715766 0.721443 875.0  
GSVT 0.732016 0.733559 0.730522 691.0  
SB 0.777060 0.775122 0.779010 1553.0  
SR 0.759134 0.764233 0.754119 907.0  
macro avg 0.746694 0.747170 0.746274 4026.0



micro avg 0.752569 0.752569 0.752569 4026.0  
weighted avg 0.752578 0.752635 0.752569 4026.0  
The result of Model Number:Dataset Number:Featuregroup Number:Rescale of 36 : 1 : 6 :  
0

|              | f1-score | precision | recall   | support |
|--------------|----------|-----------|----------|---------|
| AFIB         | 0.142614 | 0.144112  | 0.141147 | 175.0   |
| GSVT         | 0.142844 | 0.141327  | 0.144394 | 138.2   |
| SB           | 0.150440 | 0.149863  | 0.151021 | 310.6   |
| SR           | 0.146958 | 0.147695  | 0.146229 | 181.4   |
| macro avg    | 0.145714 | 0.145749  | 0.145698 | 805.2   |
| micro avg    | 0.146658 | 0.146658  | 0.146658 | 805.2   |
| weighted avg | 0.146651 | 0.146659  | 0.146658 | 805.2   |

The result of Model Number:Dataset Number:Featuregroup Number:Rescale of 36 : 1 : 6 :  
1

|              | f1-score | precision | recall   | support |
|--------------|----------|-----------|----------|---------|
| AFIB         | 0.696703 | 0.688486  | 0.705148 | 875.0   |
| GSVT         | 0.710394 | 0.716572  | 0.704327 | 691.0   |
| SB           | 0.757104 | 0.754207  | 0.760027 | 1553.0  |
| SR           | 0.739241 | 0.748178  | 0.730522 | 907.0   |
| macro avg    | 0.725860 | 0.726861  | 0.725006 | 4026.0  |
| micro avg    | 0.731893 | 0.731893  | 0.731893 | 4026.0  |
| weighted avg | 0.731935 | 0.732106  | 0.731893 | 4026.0  |

The result of Model Number:Dataset Number:Featuregroup Number:Rescale of 36 : 1 : 7 :  
0

|              | f1-score | precision | recall   | support |
|--------------|----------|-----------|----------|---------|
| AFIB         | 0.770791 | 0.752827  | 0.789759 | 875.0   |
| GSVT         | 0.739932 | 0.748066  | 0.732024 | 691.0   |
| SB           | 0.778661 | 0.728379  | 0.836416 | 1553.0  |
| SR           | 0.623196 | 0.748338  | 0.534245 | 907.0   |
| macro avg    | 0.728145 | 0.744403  | 0.723111 | 4026.0  |
| micro avg    | 0.740284 | 0.740284  | 0.740284 | 4026.0  |
| weighted avg | 0.735279 | 0.741568  | 0.740284 | 4026.0  |

The result of Model Number:Dataset Number:Featuregroup Number:Rescale of 36 : 1 : 7 :  
1

|              | f1-score | precision | recall   | support |
|--------------|----------|-----------|----------|---------|
| AFIB         | 0.785864 | 0.786748  | 0.785125 | 204.0   |
| GSVT         | 0.803907 | 0.802112  | 0.805771 | 300.0   |
| SB           | 0.820946 | 0.819850  | 0.822050 | 892.0   |
| SR           | 0.814798 | 0.816850  | 0.812766 | 681.0   |
| macro avg    | 0.806379 | 0.806390  | 0.806428 | 2077.0  |
| micro avg    | 0.813028 | 0.813028  | 0.813028 | 2077.0  |
| weighted avg | 0.813024 | 0.813053  | 0.813028 | 2077.0  |

The result of Model Number:Dataset Number:Featuregroup Number:Rescale of 36 : 1 : 8 :  
0

f1-score precision recall support  
AFIB 0.862609 0.852387 0.873151 875.0  
GSVT 0.874887 0.883344 0.866675 691.0  
SB 0.928546 0.924994 0.932133 1553.0  
SR 0.906898 0.917361 0.896697 907.0  
macro avg 0.893235 0.894522 0.892164 4026.0  
micro avg 0.900096 0.900096 0.900096 4026.0  
weighted avg 0.900129 0.900346 0.900096 4026.0  
The result of Model Number:Dataset Number:Featuregroup Number:Rescale of 36 : 1 : 8 :  
1

f1-score precision recall support  
AFIB 0.907057 0.910120 0.904047 875.0  
GSVT 0.904661 0.898289 0.911206 691.0  
SB 0.951870 0.943036 0.960878 1553.0  
SR 0.915682 0.933329 0.898736 907.0  
macro avg 0.919818 0.921193 0.918717 4026.0  
micro avg 0.926001 0.926001 0.926001 4026.0  
weighted avg 0.925875 0.926015 0.926001 4026.0  
The result of Model Number:Dataset Number:Featuregroup Number:Rescale of 36 : 1 : 9 :  
0

f1-score precision recall support  
AFIB 0.632467 0.622341 0.711653 204.0  
GSVT 0.740451 0.731860 0.749517 300.0  
SB 0.765244 0.762355 0.768161 892.0  
SR 0.600425 0.603529 0.597454 681.0  
macro avg 0.684647 0.680021 0.706696 2077.0  
micro avg 0.703947 0.703947 0.703947 2077.0  
weighted avg 0.694581 0.692123 0.703947 2077.0  
The result of Model Number:Dataset Number:Featuregroup Number:Rescale of 36 : 1 : 9 :  
1

f1-score precision recall support  
AFIB 0.706162 0.730678 0.683334 204.0  
GSVT 0.719703 0.711824 0.727846 300.0  
SB 0.738862 0.733557 0.744246 892.0  
SR 0.725666 0.729234 0.722146 681.0  
macro avg 0.722598 0.726323 0.719393 2077.0  
micro avg 0.728648 0.728648 0.728648 2077.0  
weighted avg 0.728556 0.728718 0.728648 2077.0  
The result of Model Number:Dataset Number:Featuregroup Number:Rescale of 36 : 1 :  
10 : 0

f1-score precision recall support  
AFIB 0.659739 0.718683 0.696699 204.0  
GSVT 0.896109 0.881460 0.911562 300.0  
SB 0.762865 0.757055 0.768822 892.0

SR 0.932860 0.922305 0.943687 681.0  
macro avg 0.812893 0.819876 0.830193 2077.0  
micro avg 0.839690 0.839690 0.839690 2077.0  
weighted avg 0.827719 0.825437 0.839690 2077.0  
The result of Model Number:Dataset Number:Featuregroup Number:Rescale of 36 : 1 :

10 : 1

f1-score precision recall support

AFIB 0.778470 0.784624 0.772438 875.0  
GSVT 0.798059 0.796371 0.799783 691.0  
SB 0.850754 0.843234 0.858420 1553.0  
SR 0.828106 0.836228 0.820161 907.0  
macro avg 0.813847 0.815114 0.812700 4026.0  
micro avg 0.821049 0.821049 0.821049 4026.0  
weighted avg 0.820897 0.820874 0.821049 4026.0

The result of Model Number:Dataset Number:Featuregroup Number:Rescale of 37 : 0 : 0 : 0

f1-score precision recall support

AFIB 0.832200 0.841071 0.823651 204.0  
GSVT 0.847505 0.842856 0.852299 300.0  
SB 0.867068 0.865623 0.868523 892.0  
SR 0.859840 0.861241 0.858455 681.0  
macro avg 0.851653 0.852697 0.850732 2077.0  
micro avg 0.858471 0.858471 0.858471 2077.0  
weighted avg 0.858448 0.858486 0.858471 2077.0

The result of Model Number:Dataset Number:Featuregroup Number:Rescale of 37 : 0 : 0 : 1

f1-score precision recall support

AFIB 0.181360 0.183265 0.179495 175.0  
GSVT 0.181652 0.179723 0.183624 138.2  
SB 0.191312 0.190578 0.192051 310.6  
SR 0.186884 0.187821 0.185957 181.4  
macro avg 0.185302 0.185347 0.185282 805.2  
micro avg 0.186503 0.186503 0.186503 805.2  
weighted avg 0.186494 0.186504 0.186503 805.2

The result of Model Number:Dataset Number:Featuregroup Number:Rescale of 37 : 0 : 1 : 0

f1-score precision recall support

AFIB 0.717931 0.713236 0.722750 875.0  
GSVT 0.739269 0.745559 0.733183 691.0  
SB 0.787052 0.785338 0.788775 1553.0  
SR 0.767871 0.770954 0.764823 907.0  
macro avg 0.753031 0.753772 0.752383 4026.0  
micro avg 0.759488 0.759488 0.759488 4026.0  
weighted avg 0.759507 0.759599 0.759488 4026.0

The result of Model Number:Dataset Number:Featuregroup Number:Rescale of 37 : 0 : 1 :  
1

|              | f1-score | precision | recall   | support |
|--------------|----------|-----------|----------|---------|
| AFIB         | 0.812305 | 0.781250  | 0.863401 | 875.0   |
| GSVT         | 0.841685 | 0.812636  | 0.881086 | 691.0   |
| SB           | 0.937793 | 0.921240  | 0.955983 | 1553.0  |
| SR           | 0.794290 | 0.955088  | 0.685762 | 907.0   |
| macro avg    | 0.846518 | 0.867554  | 0.846558 | 4026.0  |
| micro avg    | 0.862130 | 0.862130  | 0.862130 | 4026.0  |
| weighted avg | 0.861695 | 0.879800  | 0.862130 | 4026.0  |

The result of Model Number:Dataset Number:Featuregroup Number:Rescale of 37 : 0 : 2 :  
0

|              | f1-score | precision | recall   | support |
|--------------|----------|-----------|----------|---------|
| AFIB         | 0.757893 | 0.782187  | 0.735290 | 204.0   |
| GSVT         | 0.780567 | 0.767138  | 0.794590 | 300.0   |
| SB           | 0.794070 | 0.786220  | 0.802080 | 892.0   |
| SR           | 0.772838 | 0.782509  | 0.763420 | 681.0   |
| macro avg    | 0.776342 | 0.779514  | 0.773845 | 2077.0  |
| micro avg    | 0.781763 | 0.781763  | 0.781763 | 2077.0  |
| weighted avg | 0.781605 | 0.781851  | 0.781763 | 2077.0  |

The result of Model Number:Dataset Number:Featuregroup Number:Rescale of 37 : 0 : 2 :  
1

|              | f1-score | precision | recall   | support |
|--------------|----------|-----------|----------|---------|
| AFIB         | 0.743564 | 0.743762  | 0.743495 | 875.0   |
| GSVT         | 0.756512 | 0.753719  | 0.759421 | 691.0   |
| SB           | 0.809320 | 0.807355  | 0.811298 | 1553.0  |
| SR           | 0.790019 | 0.795689  | 0.784451 | 907.0   |
| macro avg    | 0.774854 | 0.775131  | 0.774666 | 4026.0  |
| micro avg    | 0.781610 | 0.781610  | 0.781610 | 4026.0  |
| weighted avg | 0.781617 | 0.781700  | 0.781610 | 4026.0  |

The result of Model Number:Dataset Number:Featuregroup Number:Rescale of 37 : 0 : 3 :  
0

|              | f1-score | precision | recall   | support |
|--------------|----------|-----------|----------|---------|
| AFIB         | 0.670610 | 0.652010  | 0.692413 | 875.0   |
| GSVT         | 0.679365 | 0.707980  | 0.657152 | 691.0   |
| SB           | 0.746306 | 0.745929  | 0.746693 | 1553.0  |
| SR           | 0.727583 | 0.732136  | 0.723091 | 907.0   |
| macro avg    | 0.705966 | 0.709514  | 0.704837 | 4026.0  |
| micro avg    | 0.714211 | 0.714211  | 0.714211 | 4026.0  |
| weighted avg | 0.714147 | 0.715896  | 0.714211 | 4026.0  |

The result of Model Number:Dataset Number:Featuregroup Number:Rescale of 37 : 0 : 3 :  
1

|      | f1-score | precision | recall   | support |
|------|----------|-----------|----------|---------|
| AFIB | 0.763980 | 0.765878  | 0.762143 | 875.0   |

GSVT 0.777137 0.779471 0.774914 691.0  
SB 0.824402 0.818806 0.830080 1553.0  
SR 0.808714 0.814718 0.802830 907.0  
macro avg 0.793558 0.794718 0.792492 4026.0  
micro avg 0.799708 0.799708 0.799708 4026.0  
weighted avg 0.799623 0.799631 0.799708 4026.0  
The result of Model Number:Dataset Number:Featuregroup Number:Rescale of 37 : 0 : 4 :  
0

f1-score precision recall support

AFIB 0.910834 0.934902 0.888063 204.0  
GSVT 0.935813 0.928039 0.943889 300.0  
SB 0.961600 0.958071 0.965157 892.0  
SR 0.946711 0.947858 0.945592 681.0  
macro avg 0.938739 0.942218 0.935675 2077.0  
micro avg 0.948098 0.948098 0.948098 2077.0  
weighted avg 0.948007 0.948109 0.948098 2077.0

The result of Model Number:Dataset Number:Featuregroup Number:Rescale of 37 : 0 : 4 :  
1

f1-score precision recall support

AFIB 0.842209 0.873541 0.813426 204.0  
GSVT 0.781539 0.817806 0.748424 300.0  
SB 0.818693 0.769313 0.874861 892.0  
SR 0.718970 0.768924 0.675195 681.0  
macro avg 0.790353 0.807396 0.777977 2077.0  
micro avg 0.785099 0.785099 0.785099 2077.0  
weighted avg 0.782939 0.786427 0.785099 2077.0

The result of Model Number:Dataset Number:Featuregroup Number:Rescale of 37 : 0 : 5 :  
0

f1-score precision recall support

AFIB 0.797221 0.784997 0.809963 875.0  
GSVT 0.824710 0.832794 0.816944 691.0  
SB 0.877712 0.875661 0.879799 1553.0  
SR 0.855786 0.866637 0.845222 907.0  
macro avg 0.838857 0.840022 0.837982 4026.0  
micro avg 0.846044 0.846044 0.846044 4026.0  
weighted avg 0.846181 0.846566 0.846044 4026.0

The result of Model Number:Dataset Number:Featuregroup Number:Rescale of 37 : 0 : 5 :  
1

f1-score precision recall support

AFIB 0.757894 0.762430 0.753450 204.0  
GSVT 0.778084 0.775771 0.780416 300.0  
SB 0.789999 0.789030 0.790972 892.0  
SR 0.784240 0.785165 0.783323 681.0  
macro avg 0.777554 0.778099 0.777040 2077.0

micro avg 0.783254 0.783254 0.783254 2077.0  
weighted avg 0.783236 0.783235 0.783254 2077.0  
The result of Model Number:Dataset Number:Featuregroup Number:Rescale of 37 : 0 : 6 :  
0

|              | f1-score | precision | recall   | support |
|--------------|----------|-----------|----------|---------|
| AFIB         | 0.760720 | 0.766152  | 0.755501 | 204.0   |
| GSVT         | 0.787320 | 0.786812  | 0.787844 | 300.0   |
| SB           | 0.803073 | 0.801291  | 0.804871 | 892.0   |
| SR           | 0.795894 | 0.796857  | 0.794958 | 681.0   |
| macro avg    | 0.786752 | 0.787778  | 0.785793 | 2077.0  |
| micro avg    | 0.794312 | 0.794312  | 0.794312 | 2077.0  |
| weighted avg | 0.794284 | 0.794295  | 0.794312 | 2077.0  |

The result of Model Number:Dataset Number:Featuregroup Number:Rescale of 37 : 0 : 6 :  
1

|              | f1-score | precision | recall   | support |
|--------------|----------|-----------|----------|---------|
| AFIB         | 0.725101 | 0.732141  | 0.718645 | 204.0   |
| GSVT         | 0.746837 | 0.743306  | 0.750598 | 300.0   |
| SB           | 0.761960 | 0.761110  | 0.762814 | 892.0   |
| SR           | 0.755256 | 0.756038  | 0.754479 | 681.0   |
| macro avg    | 0.747289 | 0.748149  | 0.746634 | 2077.0  |
| micro avg    | 0.753979 | 0.753979  | 0.753979 | 2077.0  |
| weighted avg | 0.753957 | 0.754030  | 0.753979 | 2077.0  |

The result of Model Number:Dataset Number:Featuregroup Number:Rescale of 37 : 0 : 7 :  
0

|              | f1-score | precision | recall   | support |
|--------------|----------|-----------|----------|---------|
| AFIB         | 0.915606 | 0.945349  | 0.887851 | 204.0   |
| GSVT         | 0.932963 | 0.924612  | 0.941652 | 300.0   |
| SB           | 0.955148 | 0.948601  | 0.961787 | 892.0   |
| SR           | 0.939570 | 0.943535  | 0.935695 | 681.0   |
| macro avg    | 0.935822 | 0.940524  | 0.931746 | 2077.0  |
| micro avg    | 0.943062 | 0.943062  | 0.943062 | 2077.0  |
| weighted avg | 0.942952 | 0.943155  | 0.943062 | 2077.0  |

The result of Model Number:Dataset Number:Featuregroup Number:Rescale of 37 : 0 : 7 :  
1

|              | f1-score | precision | recall   | support |
|--------------|----------|-----------|----------|---------|
| AFIB         | 0.709979 | 0.715859  | 0.799694 | 204.0   |
| GSVT         | 0.769924 | 0.736970  | 0.868655 | 300.0   |
| SB           | 0.702969 | 0.700527  | 0.705432 | 892.0   |
| SR           | 0.695980 | 0.696111  | 0.695853 | 681.0   |
| macro avg    | 0.719713 | 0.712367  | 0.767408 | 2077.0  |
| micro avg    | 0.735125 | 0.735125  | 0.735125 | 2077.0  |
| weighted avg | 0.711037 | 0.705849  | 0.735125 | 2077.0  |

The result of Model Number:Dataset Number:Featuregroup Number:Rescale of 37 : 0 : 8 :  
0

f1-score precision recall support  
AFIB 0.777870 0.777487 0.778313 875.0  
GSVT 0.794756 0.790845 0.798755 691.0  
SB 0.831329 0.825894 0.836841 1553.0  
SR 0.807663 0.820819 0.794944 907.0  
macro avg 0.802905 0.803762 0.802213 4026.0  
micro avg 0.808145 0.808145 0.808145 4026.0  
weighted avg 0.808102 0.808215 0.808145 4026.0  
The result of Model Number:Dataset Number:Featuregroup Number:Rescale of 37 : 0 : 8 :  
1

f1-score precision recall support  
AFIB 0.908122 0.920148 0.896543 204.0  
GSVT 0.935527 0.932150 0.938949 300.0  
SB 0.947179 0.944231 0.950149 892.0  
SR 0.936858 0.938663 0.935087 681.0  
macro avg 0.931922 0.933798 0.930182 2077.0  
micro avg 0.938328 0.938328 0.938328 2077.0  
weighted avg 0.938276 0.938295 0.938328 2077.0  
The result of Model Number:Dataset Number:Featuregroup Number:Rescale of 37 : 0 : 9 :  
0

f1-score precision recall support  
AFIB 0.781907 0.800670 0.764359 204.0  
GSVT 0.809710 0.805017 0.814556 300.0  
SB 0.827003 0.823969 0.830061 892.0  
SR 0.819816 0.820424 0.819218 681.0  
macro avg 0.809609 0.812520 0.807048 2077.0  
micro avg 0.817813 0.817813 0.817813 2077.0  
weighted avg 0.817719 0.817781 0.817813 2077.0  
The result of Model Number:Dataset Number:Featuregroup Number:Rescale of 37 : 0 : 9 :  
1

f1-score precision recall support  
AFIB 0.780891 0.795877 0.766503 875.0  
GSVT 0.832405 0.833675 0.831191 691.0  
SB 0.906383 0.902399 0.910407 1553.0  
SR 0.856503 0.847192 0.866109 907.0  
macro avg 0.844045 0.844786 0.843553 4026.0  
micro avg 0.855556 0.855556 0.855556 4026.0  
weighted avg 0.855174 0.855015 0.855556 4026.0  
The result of Model Number:Dataset Number:Featuregroup Number:Rescale of 37 : 0 :  
10 : 0

f1-score precision recall support  
AFIB 0.740009 0.749191 0.731298 204.0  
GSVT 0.753278 0.748131 0.758575 300.0  
SB 0.771117 0.769912 0.772326 892.0

SR 0.765577 0.766819 0.764347 681.0  
macro avg 0.757495 0.758513 0.756636 2077.0  
micro avg 0.763694 0.763694 0.763694 2077.0  
weighted avg 0.763669 0.763717 0.763694 2077.0  
The result of Model Number:Dataset Number:Featuregroup Number:Rescale of 37 : 0 :  
10 : 1

f1-score precision recall support  
AFIB 0.647372 0.691252 0.609161 204.0  
GSVT 0.609978 0.628076 0.593123 300.0  
SB 0.637579 0.606972 0.671800 892.0  
SR 0.565734 0.591419 0.542804 681.0  
macro avg 0.615166 0.629430 0.604222 2077.0  
micro avg 0.611989 0.611989 0.611989 2077.0  
weighted avg 0.610998 0.613199 0.611989 2077.0  
The result of Model Number:Dataset Number:Featuregroup Number:Rescale of 37 : 1 : 0 :  
0

f1-score precision recall support  
AFIB 0.767076 0.779533 0.755053 875.0  
GSVT 0.815808 0.818365 0.813317 691.0  
SB 0.887558 0.884500 0.890643 1553.0  
SR 0.840259 0.830900 0.849882 907.0  
macro avg 0.827675 0.828324 0.827224 4026.0  
micro avg 0.838719 0.838719 0.838719 4026.0  
weighted avg 0.838402 0.838260 0.838719 4026.0  
The result of Model Number:Dataset Number:Featuregroup Number:Rescale of 37 : 1 : 0 :  
1

f1-score precision recall support  
AFIB 0.673336 0.757107 0.606850 204.0  
GSVT 0.798864 0.781805 0.816719 300.0  
SB 0.852802 0.848454 0.857198 892.0  
SR 0.833670 0.823113 0.844555 681.0  
macro avg 0.789668 0.802620 0.781330 2077.0  
micro avg 0.822617 0.822617 0.822617 2077.0  
weighted avg 0.821111 0.821547 0.822617 2077.0  
The result of Model Number:Dataset Number:Featuregroup Number:Rescale of 37 : 1 : 1 :  
0

f1-score precision recall support  
AFIB 0.809502 0.788236 0.860179 875.0  
GSVT 0.778733 0.737081 0.887740 691.0  
SB 0.737890 0.733227 0.742635 1553.0  
SR 0.716743 0.729093 0.705005 907.0  
macro avg 0.760717 0.746909 0.798890 4026.0  
micro avg 0.784609 0.784609 0.784609 4026.0  
weighted avg 0.755700 0.744913 0.784609 4026.0



The result of Model Number:Dataset Number:Featuregroup Number:Rescale of 37 : 1 : 1 :  
1

|              | f1-score | precision | recall   | support |
|--------------|----------|-----------|----------|---------|
| AFIB         | 0.642825 | 0.644896  | 0.640828 | 875.0   |
| GSVT         | 0.651863 | 0.641514  | 0.662610 | 691.0   |
| SB           | 0.686843 | 0.681108  | 0.692680 | 1553.0  |
| SR           | 0.652318 | 0.668885  | 0.636575 | 907.0   |
| macro avg    | 0.658462 | 0.659101  | 0.658173 | 4026.0  |
| micro avg    | 0.663610 | 0.663610  | 0.663610 | 4026.0  |
| weighted avg | 0.663495 | 0.663689  | 0.663610 | 4026.0  |

The result of Model Number:Dataset Number:Featuregroup Number:Rescale of 37 : 1 : 2 :  
0

|              | f1-score | precision | recall   | support |
|--------------|----------|-----------|----------|---------|
| AFIB         | 0.693202 | 0.706752  | 0.680283 | 204.0   |
| GSVT         | 0.712249 | 0.707118  | 0.717481 | 300.0   |
| SB           | 0.724997 | 0.722175  | 0.727842 | 892.0   |
| SR           | 0.717072 | 0.719101  | 0.715070 | 681.0   |
| macro avg    | 0.711880 | 0.713787  | 0.710169 | 2077.0  |
| micro avg    | 0.717486 | 0.717486  | 0.717486 | 2077.0  |
| weighted avg | 0.717434 | 0.717478  | 0.717486 | 2077.0  |

The result of Model Number:Dataset Number:Featuregroup Number:Rescale of 37 : 1 : 2 :  
1

|              | f1-score | precision | recall   | support |
|--------------|----------|-----------|----------|---------|
| AFIB         | 0.791026 | 0.816718  | 0.767056 | 204.0   |
| GSVT         | 0.812865 | 0.802500  | 0.823664 | 300.0   |
| SB           | 0.835798 | 0.832646  | 0.838982 | 892.0   |
| SR           | 0.824108 | 0.825600  | 0.822653 | 681.0   |
| macro avg    | 0.815949 | 0.819366  | 0.813089 | 2077.0  |
| micro avg    | 0.824351 | 0.824351  | 0.824351 | 2077.0  |
| weighted avg | 0.824255 | 0.824417  | 0.824351 | 2077.0  |

The result of Model Number:Dataset Number:Featuregroup Number:Rescale of 37 : 1 : 3 :  
0

|              | f1-score | precision | recall   | support |
|--------------|----------|-----------|----------|---------|
| AFIB         | 0.785231 | 0.794413  | 0.776405 | 204.0   |
| GSVT         | 0.708282 | 0.681241  | 0.808140 | 300.0   |
| SB           | 0.657141 | 0.655593  | 0.658703 | 892.0   |
| SR           | 0.815948 | 0.817516  | 0.814391 | 681.0   |
| macro avg    | 0.741651 | 0.737191  | 0.764410 | 2077.0  |
| micro avg    | 0.742895 | 0.742895  | 0.742895 | 2077.0  |
| weighted avg | 0.729178 | 0.726023  | 0.742895 | 2077.0  |

The result of Model Number:Dataset Number:Featuregroup Number:Rescale of 37 : 1 : 3 :  
1

|      | f1-score | precision | recall   | support |
|------|----------|-----------|----------|---------|
| AFIB | 0.934181 | 0.944139  | 0.924584 | 204.0   |

GSVT 0.951361 0.946142 0.956743 300.0  
SB 0.973321 0.971699 0.974955 892.0  
SR 0.965208 0.966780 0.963653 681.0  
macro avg 0.956018 0.957190 0.954984 2077.0  
micro avg 0.963671 0.963671 0.963671 2077.0  
weighted avg 0.963645 0.963688 0.963671 2077.0  
The result of Model Number:Dataset Number:Featuregroup Number:Rescale of 37 : 1 : 4 :  
0

f1-score precision recall support  
AFIB 0.739579 0.749458 0.730166 204.0  
GSVT 0.752645 0.748060 0.757401 300.0  
SB 0.770787 0.770104 0.771477 892.0  
SR 0.765092 0.765208 0.764981 681.0  
macro avg 0.757026 0.758207 0.756006 2077.0  
micro avg 0.763256 0.763256 0.763256 2077.0  
weighted avg 0.763234 0.763287 0.763256 2077.0  
The result of Model Number:Dataset Number:Featuregroup Number:Rescale of 37 : 1 : 4 :  
1

f1-score precision recall support  
AFIB 0.691561 0.701086 0.682594 875.0  
GSVT 0.706658 0.703731 0.709800 691.0  
SB 0.752701 0.742832 0.762867 1553.0  
SR 0.729069 0.739957 0.718821 907.0  
macro avg 0.719997 0.721902 0.718521 4026.0  
micro avg 0.726390 0.726390 0.726390 4026.0  
weighted avg 0.726186 0.726400 0.726390 4026.0  
The result of Model Number:Dataset Number:Featuregroup Number:Rescale of 37 : 1 : 5 :  
0

f1-score precision recall support  
AFIB 0.830418 0.886706 0.781403 204.0  
GSVT 0.782451 0.805666 0.760830 300.0  
SB 0.817856 0.778595 0.861753 892.0  
SR 0.725697 0.758644 0.696283 681.0  
macro avg 0.789105 0.807403 0.775067 2077.0  
micro avg 0.785030 0.785030 0.785030 2077.0  
weighted avg 0.783759 0.786582 0.785030 2077.0  
The result of Model Number:Dataset Number:Featuregroup Number:Rescale of 37 : 1 : 5 :  
1

f1-score precision recall support  
AFIB 0.818114 0.823840 0.812497 204.0  
GSVT 0.837149 0.833021 0.841330 300.0  
SB 0.853787 0.852366 0.855223 892.0  
SR 0.845290 0.847296 0.843303 681.0  
macro avg 0.838585 0.839131 0.838088 2077.0

micro avg 0.845111 0.845111 0.845111 2077.0  
weighted avg 0.845094 0.845108 0.845111 2077.0  
The result of Model Number:Dataset Number:Featuregroup Number:Rescale of 37 : 1 : 6 :  
0

|              | f1-score | precision | recall   | support |
|--------------|----------|-----------|----------|---------|
| AFIB         | 0.649951 | 0.658903  | 0.641523 | 875.0   |
| GSVT         | 0.664140 | 0.661389  | 0.667093 | 691.0   |
| SB           | 0.707412 | 0.698137  | 0.716967 | 1553.0  |
| SR           | 0.685203 | 0.695435  | 0.675571 | 907.0   |
| macro avg    | 0.676676 | 0.678466  | 0.675289 | 4026.0  |
| micro avg    | 0.682684 | 0.682684  | 0.682684 | 4026.0  |
| weighted avg | 0.682493 | 0.682694  | 0.682684 | 4026.0  |

The result of Model Number:Dataset Number:Featuregroup Number:Rescale of 37 : 1 : 6 :  
1

|              | f1-score | precision | recall   | support |
|--------------|----------|-----------|----------|---------|
| AFIB         | 0.857712 | 0.874993  | 0.841651 | 204.0   |
| GSVT         | 0.885233 | 0.878124  | 0.892630 | 300.0   |
| SB           | 0.904397 | 0.903487  | 0.905310 | 892.0   |
| SR           | 0.896154 | 0.895639  | 0.896679 | 681.0   |
| macro avg    | 0.885874 | 0.888061  | 0.884067 | 2077.0  |
| micro avg    | 0.894396 | 0.894396  | 0.894396 | 2077.0  |
| weighted avg | 0.894341 | 0.894452  | 0.894396 | 2077.0  |

The result of Model Number:Dataset Number:Featuregroup Number:Rescale of 37 : 1 : 7 :  
0

|              | f1-score | precision | recall   | support |
|--------------|----------|-----------|----------|---------|
| AFIB         | 0.786721 | 0.805863  | 0.768662 | 204.0   |
| GSVT         | 0.796611 | 0.785644  | 0.807994 | 300.0   |
| SB           | 0.812696 | 0.804580  | 0.820983 | 892.0   |
| SR           | 0.798507 | 0.808985  | 0.788319 | 681.0   |
| macro avg    | 0.798634 | 0.801268  | 0.796489 | 2077.0  |
| micro avg    | 0.803258 | 0.803258  | 0.803258 | 2077.0  |
| weighted avg | 0.803169 | 0.803415  | 0.803258 | 2077.0  |

The result of Model Number:Dataset Number:Featuregroup Number:Rescale of 37 : 1 : 7 :  
1

|              | f1-score | precision | recall   | support |
|--------------|----------|-----------|----------|---------|
| AFIB         | 0.885145 | 0.897675  | 0.873686 | 204.0   |
| GSVT         | 0.903522 | 0.886887  | 0.920959 | 300.0   |
| SB           | 0.922779 | 0.912577  | 0.933228 | 892.0   |
| SR           | 0.903386 | 0.921786  | 0.885761 | 681.0   |
| macro avg    | 0.903708 | 0.904731  | 0.903409 | 2077.0  |
| micro avg    | 0.910044 | 0.910044  | 0.910044 | 2077.0  |
| weighted avg | 0.909943 | 0.910422  | 0.910044 | 2077.0  |

The result of Model Number:Dataset Number:Featuregroup Number:Rescale of 37 : 1 : 8 :  
0

f1-score precision recall support  
AFIB 0.742056 0.752958 0.731534 204.0  
GSVT 0.760858 0.754389 0.767454 300.0  
SB 0.774007 0.770911 0.777131 892.0  
SR 0.766352 0.770114 0.762636 681.0  
macro avg 0.760818 0.762093 0.759689 2077.0  
micro avg 0.766502 0.766502 0.766502 2077.0  
weighted avg 0.766460 0.766500 0.766502 2077.0  
The result of Model Number:Dataset Number:Featuregroup Number:Rescale of 37 : 1 : 8 :  
1

f1-score precision recall support  
AFIB 0.786775 0.776331 0.797566 875.0  
GSVT 0.802745 0.810355 0.795311 691.0  
SB 0.854235 0.852215 0.856270 1553.0  
SR 0.831061 0.839800 0.822537 907.0  
macro avg 0.818704 0.819675 0.817921 4026.0  
micro avg 0.825449 0.825449 0.825449 4026.0  
weighted avg 0.825515 0.825741 0.825449 4026.0  
The result of Model Number:Dataset Number:Featuregroup Number:Rescale of 37 : 1 : 9 :  
0

f1-score precision recall support  
AFIB 0.851934 0.862876 0.841308 875.0  
GSVT 0.861359 0.854393 0.868577 691.0  
SB 0.921407 0.918637 0.924197 1553.0  
SR 0.898592 0.898214 0.898981 907.0  
macro avg 0.883323 0.883530 0.883266 4026.0  
micro avg 0.890955 0.890955 0.890955 4026.0  
weighted avg 0.890862 0.890891 0.890955 4026.0  
The result of Model Number:Dataset Number:Featuregroup Number:Rescale of 37 : 1 : 9 :  
1

f1-score precision recall support  
AFIB 0.859672 0.904085 0.819674 204.0  
GSVT 0.901440 0.892628 0.910446 300.0  
SB 0.917334 0.909954 0.924839 892.0  
SR 0.906003 0.907106 0.904940 681.0  
macro avg 0.896112 0.903443 0.889975 2077.0  
micro avg 0.905907 0.905907 0.905907 2077.0  
weighted avg 0.905660 0.905941 0.905907 2077.0  
The result of Model Number:Dataset Number:Featuregroup Number:Rescale of 37 : 1 :  
10 : 0

f1-score precision recall support  
AFIB 0.883710 0.889489 0.878061 204.0  
GSVT 0.905851 0.903765 0.907958 300.0  
SB 0.922021 0.920690 0.923362 892.0

SR 0.914754 0.915710 0.913817 681.0  
macro avg 0.906584 0.907413 0.905799 2077.0  
micro avg 0.913558 0.913558 0.913558 2077.0  
weighted avg 0.913540 0.913548 0.913558 2077.0  
The result of Model Number:Dataset Number:Featuregroup Number:Rescale of 37 : 1 :  
10 : 1

f1-score precision recall support  
AFIB 0.741763 0.759811 0.724736 204.0  
GSVT 0.751088 0.740748 0.761820 300.0  
SB 0.766254 0.758602 0.774067 892.0  
SR 0.752875 0.762755 0.743269 681.0  
macro avg 0.752995 0.755479 0.750973 2077.0  
micro avg 0.757355 0.757355 0.757355 2077.0  
weighted avg 0.757271 0.757503 0.757355 2077.0

The result of Model Number:Dataset Number:Featuregroup Number:Rescale of 38 : 0 : 0 :  
0

f1-score precision recall support  
AFIB 0.687693 0.699126 0.676786 204.0  
GSVT 0.700880 0.695900 0.705983 300.0  
SB 0.717136 0.713106 0.721229 892.0  
SR 0.708000 0.712332 0.703744 681.0  
macro avg 0.703427 0.705116 0.701935 2077.0  
micro avg 0.708929 0.708929 0.708929 2077.0  
weighted avg 0.708901 0.708994 0.708929 2077.0

The result of Model Number:Dataset Number:Featuregroup Number:Rescale of 38 : 0 : 0 :  
1

f1-score precision recall support  
AFIB 0.586294 0.650666 0.533653 204.0  
GSVT 0.684578 0.676019 0.693490 300.0  
SB 0.728357 0.724640 0.732112 892.0  
SR 0.711294 0.701350 0.721528 681.0  
macro avg 0.677631 0.688169 0.670196 2077.0  
micro avg 0.703571 0.703571 0.703571 2077.0  
weighted avg 0.702486 0.702715 0.703571 2077.0

The result of Model Number:Dataset Number:Featuregroup Number:Rescale of 38 : 0 : 1 :  
0

f1-score precision recall support  
AFIB 0.774440 0.775993 0.772927 875.0  
GSVT 0.776358 0.772167 0.780616 691.0  
SB 0.811555 0.807219 0.815943 1553.0  
SR 0.792140 0.801534 0.782986 907.0  
macro avg 0.788623 0.789228 0.788118 4026.0  
micro avg 0.793106 0.793106 0.793106 4026.0  
weighted avg 0.793074 0.793135 0.793106 4026.0

The result of Model Number:Dataset Number:Featuregroup Number:Rescale of 38 : 0 : 1 :  
1

|              | f1-score | precision | recall   | support |
|--------------|----------|-----------|----------|---------|
| AFIB         | 0.855720 | 0.858229  | 0.853292 | 875.0   |
| GSVT         | 0.869880 | 0.858707  | 0.881459 | 691.0   |
| SB           | 0.920623 | 0.918385  | 0.922876 | 1553.0  |
| SR           | 0.897311 | 0.907960  | 0.886919 | 907.0   |
| macro avg    | 0.885884 | 0.885820  | 0.886136 | 4026.0  |
| micro avg    | 0.892543 | 0.892543  | 0.892543 | 4026.0  |
| weighted avg | 0.892556 | 0.892720  | 0.892543 | 4026.0  |

The result of Model Number:Dataset Number:Featuregroup Number:Rescale of 38 : 0 : 2 :  
0

|              | f1-score | precision | recall   | support |
|--------------|----------|-----------|----------|---------|
| AFIB         | 0.782931 | 0.867500  | 0.713529 | 204.0   |
| GSVT         | 0.907584 | 0.892823  | 0.922984 | 300.0   |
| SB           | 0.967882 | 0.963476  | 0.972331 | 892.0   |
| SR           | 0.944496 | 0.932477  | 0.956842 | 681.0   |
| macro avg    | 0.900723 | 0.914069  | 0.891421 | 2077.0  |
| micro avg    | 0.934706 | 0.934706  | 0.934706 | 2077.0  |
| weighted avg | 0.933339 | 0.933680  | 0.934706 | 2077.0  |

The result of Model Number:Dataset Number:Featuregroup Number:Rescale of 38 : 0 : 2 :  
1

|              | f1-score | precision | recall   | support |
|--------------|----------|-----------|----------|---------|
| AFIB         | 0.848307 | 0.850460  | 0.846195 | 875.0   |
| GSVT         | 0.863276 | 0.853925  | 0.872871 | 691.0   |
| SB           | 0.909846 | 0.899554  | 0.920390 | 1553.0  |
| SR           | 0.868246 | 0.892016  | 0.845745 | 907.0   |
| macro avg    | 0.872419 | 0.873989  | 0.871300 | 4026.0  |
| micro avg    | 0.879293 | 0.879293  | 0.879293 | 4026.0  |
| weighted avg | 0.879107 | 0.879354  | 0.879293 | 4026.0  |

The result of Model Number:Dataset Number:Featuregroup Number:Rescale of 38 : 0 : 3 :  
0

|              | f1-score | precision | recall   | support |
|--------------|----------|-----------|----------|---------|
| AFIB         | 0.855206 | 0.843073  | 0.867714 | 875.0   |
| GSVT         | 0.872801 | 0.881308  | 0.864463 | 691.0   |
| SB           | 0.928830 | 0.925803  | 0.931879 | 1553.0  |
| SR           | 0.907139 | 0.918733  | 0.895844 | 907.0   |
| macro avg    | 0.890994 | 0.892229  | 0.889975 | 4026.0  |
| micro avg    | 0.898245 | 0.898245  | 0.898245 | 4026.0  |
| weighted avg | 0.898326 | 0.898593  | 0.898245 | 4026.0  |

The result of Model Number:Dataset Number:Featuregroup Number:Rescale of 38 : 0 : 3 :  
1

|      | f1-score | precision | recall   | support |
|------|----------|-----------|----------|---------|
| AFIB | 0.729889 | 0.734998  | 0.724878 | 204.0   |

GSVT 0.746871 0.743189 0.750601 300.0  
SB 0.761715 0.760448 0.762996 892.0  
SR 0.754134 0.755925 0.752361 681.0  
macro avg 0.748153 0.748640 0.747709 2077.0  
micro avg 0.753975 0.753975 0.753975 2077.0  
weighted avg 0.753960 0.753972 0.753975 2077.0  
The result of Model Number:Dataset Number:Featuregroup Number:Rescale of 38 : 0 : 4 :  
0

f1-score precision recall support  
AFIB 0.883236 0.881005 0.885617 875.0  
GSVT 0.900468 0.895517 0.905522 691.0  
SB 0.942861 0.937177 0.948628 1553.0  
SR 0.915061 0.931577 0.899138 907.0  
macro avg 0.910407 0.911319 0.909726 4026.0  
micro avg 0.916385 0.916385 0.916385 4026.0  
weighted avg 0.916363 0.916557 0.916385 4026.0  
The result of Model Number:Dataset Number:Featuregroup Number:Rescale of 38 : 0 : 4 :  
1

f1-score precision recall support  
AFIB 0.861323 0.880483 0.843164 204.0  
GSVT 0.898020 0.892439 0.903705 300.0  
SB 0.917514 0.915581 0.919466 892.0  
SR 0.907741 0.907099 0.908413 681.0  
macro avg 0.896149 0.898901 0.893687 2077.0  
micro avg 0.906071 0.906071 0.906071 2077.0  
weighted avg 0.905975 0.906010 0.906071 2077.0  
The result of Model Number:Dataset Number:Featuregroup Number:Rescale of 38 : 0 : 5 :  
0

f1-score precision recall support  
AFIB 0.597867 0.611491 0.584932 875.0  
GSVT 0.636207 0.637464 0.635167 691.0  
SB 0.696053 0.692243 0.699907 1553.0  
SR 0.657874 0.649894 0.666145 907.0  
macro avg 0.647000 0.647773 0.646537 4026.0  
micro avg 0.656201 0.656201 0.656201 4026.0  
weighted avg 0.655841 0.655750 0.656201 4026.0  
The result of Model Number:Dataset Number:Featuregroup Number:Rescale of 38 : 0 : 5 :  
1

f1-score precision recall support  
AFIB 0.638252 0.665245 0.613575 204.0  
GSVT 0.587783 0.588812 0.595575 300.0  
SB 0.632803 0.602657 0.666738 892.0  
SR 0.559429 0.604487 0.521634 681.0  
macro avg 0.604567 0.615300 0.599381 2077.0

micro avg 0.603662 0.603662 0.603662 2077.0  
weighted avg 0.602778 0.607405 0.603662 2077.0  
The result of Model Number:Dataset Number:Featuregroup Number:Rescale of 38 : 0 : 6 :  
0

|              | f1-score | precision | recall   | support |
|--------------|----------|-----------|----------|---------|
| AFIB         | 0.688152 | 0.722535  | 0.657239 | 204.0   |
| GSVT         | 0.708898 | 0.695761  | 0.722788 | 300.0   |
| SB           | 0.725121 | 0.717812  | 0.732596 | 892.0   |
| SR           | 0.705011 | 0.711308  | 0.698888 | 681.0   |
| macro avg    | 0.706795 | 0.711854  | 0.702878 | 2077.0  |
| micro avg    | 0.712726 | 0.712726  | 0.712726 | 2077.0  |
| weighted avg | 0.712553 | 0.712958  | 0.712726 | 2077.0  |

The result of Model Number:Dataset Number:Featuregroup Number:Rescale of 38 : 0 : 6 :  
1

|              | f1-score | precision | recall   | support |
|--------------|----------|-----------|----------|---------|
| AFIB         | 0.646698 | 0.652452  | 0.641079 | 875.0   |
| GSVT         | 0.660272 | 0.653026  | 0.667723 | 691.0   |
| SB           | 0.710119 | 0.704590  | 0.715741 | 1553.0  |
| SR           | 0.686521 | 0.696252  | 0.677061 | 907.0   |
| macro avg    | 0.675902 | 0.676580  | 0.675401 | 4026.0  |
| micro avg    | 0.682559 | 0.682559  | 0.682559 | 4026.0  |
| weighted avg | 0.682463 | 0.682530  | 0.682559 | 4026.0  |

The result of Model Number:Dataset Number:Featuregroup Number:Rescale of 38 : 0 : 7 :  
0

|              | f1-score | precision | recall   | support |
|--------------|----------|-----------|----------|---------|
| AFIB         | 0.690536 | 0.703351  | 0.678351 | 204.0   |
| GSVT         | 0.705720 | 0.702020  | 0.709474 | 300.0   |
| SB           | 0.716987 | 0.714438  | 0.719558 | 892.0   |
| SR           | 0.709605 | 0.710884  | 0.708362 | 681.0   |
| macro avg    | 0.705712 | 0.707673  | 0.703936 | 2077.0  |
| micro avg    | 0.710383 | 0.710383  | 0.710383 | 2077.0  |
| weighted avg | 0.710341 | 0.710390  | 0.710383 | 2077.0  |

The result of Model Number:Dataset Number:Featuregroup Number:Rescale of 38 : 0 : 7 :  
1

|              | f1-score | precision | recall   | support |
|--------------|----------|-----------|----------|---------|
| AFIB         | 0.710937 | 0.724002  | 0.698422 | 204.0   |
| GSVT         | 0.722878 | 0.718144  | 0.727695 | 300.0   |
| SB           | 0.735244 | 0.731654  | 0.738870 | 892.0   |
| SR           | 0.727644 | 0.730669  | 0.724654 | 681.0   |
| macro avg    | 0.724176 | 0.726117  | 0.722410 | 2077.0  |
| micro avg    | 0.728622 | 0.728622  | 0.728622 | 2077.0  |
| weighted avg | 0.728578 | 0.728628  | 0.728622 | 2077.0  |

The result of Model Number:Dataset Number:Featuregroup Number:Rescale of 38 : 0 : 8 :  
0



f1-score precision recall support  
AFIB 0.901903 0.919502 0.885121 204.0  
GSVT 0.924382 0.912454 0.936687 300.0  
SB 0.940115 0.930821 0.949601 892.0  
SR 0.920465 0.933254 0.908028 681.0  
macro avg 0.921716 0.924008 0.919859 2077.0  
micro avg 0.927772 0.927772 0.927772 2077.0  
weighted avg 0.927647 0.927854 0.927772 2077.0  
The result of Model Number:Dataset Number:Featuregroup Number:Rescale of 38 : 0 : 8 :  
1

f1-score precision recall support  
AFIB 0.742147 0.721563 0.766276 875.0  
GSVT 0.751835 0.783504 0.727254 691.0  
SB 0.825917 0.825500 0.826346 1553.0  
SR 0.805197 0.810236 0.800226 907.0  
macro avg 0.781274 0.785201 0.780025 4026.0  
micro avg 0.790398 0.790398 0.790398 4026.0  
weighted avg 0.790328 0.792264 0.790398 4026.0  
The result of Model Number:Dataset Number:Featuregroup Number:Rescale of 38 : 0 : 9 :  
0

f1-score precision recall support  
AFIB 0.691727 0.671798 0.758957 875.0  
GSVT 0.762376 0.759941 0.764925 691.0  
SB 0.643557 0.634073 0.653382 1553.0  
SR 0.770583 0.785623 0.756204 907.0  
macro avg 0.717061 0.712859 0.733367 4026.0  
micro avg 0.718636 0.718636 0.718636 4026.0  
weighted avg 0.703037 0.698017 0.718636 4026.0  
The result of Model Number:Dataset Number:Featuregroup Number:Rescale of 38 : 0 : 9 :  
1

f1-score precision recall support  
AFIB 0.781667 0.785261 0.778146 875.0  
GSVT 0.749177 0.753690 0.744742 691.0  
SB 0.803615 0.767794 0.842981 1553.0  
SR 0.687266 0.748179 0.635663 907.0  
macro avg 0.755431 0.763731 0.750383 4026.0  
micro avg 0.765323 0.765323 0.765323 4026.0  
weighted avg 0.763290 0.764750 0.765323 4026.0  
The result of Model Number:Dataset Number:Featuregroup Number:Rescale of 38 : 0 :  
10 : 0

f1-score precision recall support  
AFIB 0.682110 0.681294 0.683044 875.0  
GSVT 0.695407 0.697799 0.693103 691.0  
SB 0.736539 0.732002 0.741139 1553.0

SR 0.721551 0.728598 0.714718 907.0  
macro avg 0.708902 0.709923 0.708001 4026.0  
micro avg 0.714316 0.714316 0.714316 4026.0  
weighted avg 0.714273 0.714344 0.714316 4026.0  
The result of Model Number:Dataset Number:Featuregroup Number:Rescale of 38 : 0 :  
10 : 1

f1-score precision recall support  
AFIB 0.691159 0.698226 0.684292 875.0  
GSVT 0.690951 0.680277 0.702047 691.0  
SB 0.728861 0.724509 0.733272 1553.0  
SR 0.709569 0.719067 0.700341 907.0  
macro avg 0.705135 0.705519 0.704988 4026.0  
micro avg 0.709849 0.709849 0.709849 4026.0  
weighted avg 0.709814 0.709979 0.709849 4026.0  
The result of Model Number:Dataset Number:Featuregroup Number:Rescale of 38 : 1 : 0 :  
0

f1-score precision recall support  
AFIB 0.877633 0.865294 0.890372 875.0  
GSVT 0.896528 0.903255 0.889924 691.0  
SB 0.953355 0.950553 0.956177 1553.0  
SR 0.929872 0.942736 0.917369 907.0  
macro avg 0.914347 0.915460 0.913461 4026.0  
micro avg 0.921761 0.921761 0.921761 4026.0  
weighted avg 0.921854 0.922144 0.921761 4026.0  
The result of Model Number:Dataset Number:Featuregroup Number:Rescale of 38 : 1 : 0 :  
1

f1-score precision recall support  
AFIB 0.820478 0.822883 0.818149 875.0  
GSVT 0.834054 0.823341 0.845157 691.0  
SB 0.882707 0.880562 0.884867 1553.0  
SR 0.860356 0.870566 0.850391 907.0  
macro avg 0.849399 0.849338 0.849641 4026.0  
micro avg 0.855784 0.855784 0.855784 4026.0  
weighted avg 0.855796 0.855953 0.855784 4026.0  
The result of Model Number:Dataset Number:Featuregroup Number:Rescale of 38 : 1 : 1 :  
0

f1-score precision recall support  
AFIB 0.783060 0.793649 0.773078 204.0  
GSVT 0.812803 0.811484 0.814156 300.0  
SB 0.830454 0.829348 0.831571 892.0  
SR 0.821966 0.820913 0.823051 681.0  
macro avg 0.812071 0.813848 0.810464 2077.0  
micro avg 0.820517 0.820517 0.820517 2077.0  
weighted avg 0.820467 0.820496 0.820517 2077.0

The result of Model Number:Dataset Number:Featuregroup Number:Rescale of 38 : 1 : 1 : 1

|              | f1-score | precision | recall   | support |
|--------------|----------|-----------|----------|---------|
| AFIB         | 0.713505 | 0.720455  | 0.706862 | 204.0   |
| GSVT         | 0.730005 | 0.726653  | 0.733413 | 300.0   |
| SB           | 0.740093 | 0.737547  | 0.742662 | 892.0   |
| SR           | 0.733843 | 0.736690  | 0.731052 | 681.0   |
| macro avg    | 0.729361 | 0.730336  | 0.728497 | 2077.0  |
| micro avg    | 0.734003 | 0.734003  | 0.734003 | 2077.0  |
| weighted avg | 0.733975 | 0.734014  | 0.734003 | 2077.0  |

The result of Model Number:Dataset Number:Featuregroup Number:Rescale of 38 : 1 : 2 : 0

|              | f1-score | precision | recall   | support |
|--------------|----------|-----------|----------|---------|
| AFIB         | 0.747451 | 0.783687  | 0.714501 | 204.0   |
| GSVT         | 0.778581 | 0.768407  | 0.789185 | 300.0   |
| SB           | 0.799551 | 0.793471  | 0.805736 | 892.0   |
| SR           | 0.777289 | 0.779611  | 0.775014 | 681.0   |
| macro avg    | 0.775718 | 0.781294  | 0.771109 | 2077.0  |
| micro avg    | 0.784312 | 0.784312  | 0.784312 | 2077.0  |
| weighted avg | 0.784106 | 0.784345  | 0.784312 | 2077.0  |

The result of Model Number:Dataset Number:Featuregroup Number:Rescale of 38 : 1 : 2 : 1

|              | f1-score | precision | recall   | support |
|--------------|----------|-----------|----------|---------|
| AFIB         | 0.694525 | 0.718814  | 0.672145 | 204.0   |
| GSVT         | 0.723856 | 0.719444  | 0.728422 | 300.0   |
| SB           | 0.738720 | 0.735685  | 0.741783 | 892.0   |
| SR           | 0.731891 | 0.730823  | 0.732966 | 681.0   |
| macro avg    | 0.722248 | 0.726191  | 0.718829 | 2077.0  |
| micro avg    | 0.730122 | 0.730122  | 0.730122 | 2077.0  |
| weighted avg | 0.729993 | 0.730088  | 0.730122 | 2077.0  |

The result of Model Number:Dataset Number:Featuregroup Number:Rescale of 38 : 1 : 3 : 0

|              | f1-score | precision | recall   | support |
|--------------|----------|-----------|----------|---------|
| AFIB         | 0.737016 | 0.785037  | 0.694857 | 204.0   |
| GSVT         | 0.769303 | 0.750394  | 0.789295 | 300.0   |
| SB           | 0.791865 | 0.781693  | 0.802333 | 892.0   |
| SR           | 0.771297 | 0.780507  | 0.762354 | 681.0   |
| macro avg    | 0.767370 | 0.774408  | 0.762210 | 2077.0  |
| micro avg    | 0.776785 | 0.776785  | 0.776785 | 2077.0  |
| weighted avg | 0.776475 | 0.777112  | 0.776785 | 2077.0  |

The result of Model Number:Dataset Number:Featuregroup Number:Rescale of 38 : 1 : 3 : 1

|      | f1-score | precision | recall   | support |
|------|----------|-----------|----------|---------|
| AFIB | 0.721762 | 0.735157  | 0.709026 | 204.0   |

GSVT 0.737633 0.733765 0.741557 300.0  
SB 0.749409 0.746745 0.752097 892.0  
SR 0.741694 0.743031 0.740394 681.0  
macro avg 0.737625 0.739675 0.735768 2077.0  
micro avg 0.742507 0.742507 0.742507 2077.0  
weighted avg 0.742463 0.742514 0.742507 2077.0  
The result of Model Number:Dataset Number:Featuregroup Number:Rescale of 38 : 1 : 4 :  
0

f1-score precision recall support

AFIB 0.770838 0.787007 0.755341 204.0  
GSVT 0.788720 0.784053 0.793450 300.0  
SB 0.807948 0.806056 0.809850 892.0  
SR 0.801124 0.800894 0.801362 681.0  
macro avg 0.792158 0.794502 0.790001 2077.0  
micro avg 0.799344 0.799344 0.799344 2077.0  
weighted avg 0.799288 0.799314 0.799344 2077.0  
The result of Model Number:Dataset Number:Featuregroup Number:Rescale of 38 : 1 : 4 :  
1

f1-score precision recall support

AFIB 0.840577 0.859603 0.822483 204.0  
GSVT 0.862946 0.858721 0.867251 300.0  
SB 0.880600 0.878057 0.883164 892.0  
SR 0.874942 0.874564 0.875334 681.0  
macro avg 0.864767 0.867736 0.862058 2077.0  
micro avg 0.872338 0.872338 0.872338 2077.0  
weighted avg 0.872264 0.872306 0.872338 2077.0  
The result of Model Number:Dataset Number:Featuregroup Number:Rescale of 38 : 1 : 5 :  
0

f1-score precision recall support

AFIB 0.857709 0.851322 0.864280 875.0  
GSVT 0.873706 0.876825 0.870660 691.0  
SB 0.927109 0.924912 0.929317 1553.0  
SR 0.905951 0.914108 0.897972 907.0  
macro avg 0.891119 0.891792 0.890557 4026.0  
micro avg 0.898053 0.898053 0.898053 4026.0  
weighted avg 0.898093 0.898231 0.898053 4026.0  
The result of Model Number:Dataset Number:Featuregroup Number:Rescale of 38 : 1 : 5 :  
1

f1-score precision recall support

AFIB 0.827579 0.836400 0.819077 204.0  
GSVT 0.842798 0.838175 0.847566 300.0  
SB 0.862253 0.860815 0.863700 892.0  
SR 0.855065 0.856458 0.853688 681.0  
macro avg 0.846924 0.847962 0.846008 2077.0

micro avg 0.853704 0.853704 0.853704 2077.0  
weighted avg 0.853680 0.853718 0.853704 2077.0  
The result of Model Number:Dataset Number:Featuregroup Number:Rescale of 38 : 1 : 6 :  
0

|              | f1-score | precision | recall   | support |
|--------------|----------|-----------|----------|---------|
| AFIB         | 0.822335 | 0.815748  | 0.829126 | 875.0   |
| GSVT         | 0.845045 | 0.846487  | 0.843707 | 691.0   |
| SB           | 0.895882 | 0.893480  | 0.898304 | 1553.0  |
| SR           | 0.871403 | 0.881548  | 0.861509 | 907.0   |
| macro avg    | 0.858666 | 0.859316  | 0.858161 | 4026.0  |
| micro avg    | 0.865609 | 0.865609  | 0.865609 | 4026.0  |
| weighted avg | 0.865657 | 0.865832  | 0.865609 | 4026.0  |

The result of Model Number:Dataset Number:Featuregroup Number:Rescale of 38 : 1 : 6 :  
1

|              | f1-score | precision | recall   | support |
|--------------|----------|-----------|----------|---------|
| AFIB         | 0.691705 | 0.709220  | 0.675099 | 204.0   |
| GSVT         | 0.706727 | 0.699042  | 0.714701 | 300.0   |
| SB           | 0.726633 | 0.723007  | 0.730299 | 892.0   |
| SR           | 0.715371 | 0.718580  | 0.712218 | 681.0   |
| macro avg    | 0.710109 | 0.712462  | 0.708079 | 2077.0  |
| micro avg    | 0.716696 | 0.716696  | 0.716696 | 2077.0  |
| weighted avg | 0.716635 | 0.716740  | 0.716696 | 2077.0  |

The result of Model Number:Dataset Number:Featuregroup Number:Rescale of 38 : 1 : 7 :  
0

|              | f1-score | precision | recall   | support |
|--------------|----------|-----------|----------|---------|
| AFIB         | 0.768383 | 0.751876  | 0.785672 | 875.0   |
| GSVT         | 0.795741 | 0.807281  | 0.784579 | 691.0   |
| SB           | 0.847098 | 0.846937  | 0.847262 | 1553.0  |
| SR           | 0.825867 | 0.835466  | 0.816490 | 907.0   |
| macro avg    | 0.809272 | 0.810390  | 0.808501 | 4026.0  |
| micro avg    | 0.816185 | 0.816185  | 0.816185 | 4026.0  |
| weighted avg | 0.816392 | 0.816886  | 0.816185 | 4026.0  |

The result of Model Number:Dataset Number:Featuregroup Number:Rescale of 38 : 1 : 7 :  
1

|              | f1-score | precision | recall   | support |
|--------------|----------|-----------|----------|---------|
| AFIB         | 0.820341 | 0.829267  | 0.811844 | 204.0   |
| GSVT         | 0.848102 | 0.844565  | 0.851806 | 300.0   |
| SB           | 0.865481 | 0.864707  | 0.866257 | 892.0   |
| SR           | 0.857302 | 0.857309  | 0.857302 | 681.0   |
| macro avg    | 0.847806 | 0.848962  | 0.846802 | 2077.0  |
| micro avg    | 0.855889 | 0.855889  | 0.855889 | 2077.0  |
| weighted avg | 0.855856 | 0.855891  | 0.855889 | 2077.0  |

The result of Model Number:Dataset Number:Featuregroup Number:Rescale of 38 : 1 : 8 :  
0

f1-score precision recall support  
AFIB 0.742265 0.757899 0.727381 204.0  
GSVT 0.765343 0.758351 0.772483 300.0  
SB 0.777843 0.776109 0.779587 892.0  
SR 0.768599 0.769402 0.767805 681.0  
macro avg 0.763512 0.765440 0.761814 2077.0  
micro avg 0.769570 0.769570 0.769570 2077.0  
weighted avg 0.769512 0.769556 0.769570 2077.0  
The result of Model Number:Dataset Number:Featuregroup Number:Rescale of 38 : 1 : 8 :  
1

f1-score precision recall support  
AFIB 0.800979 0.806968 0.795108 204.0  
GSVT 0.821445 0.817110 0.825827 300.0  
SB 0.835308 0.834191 0.836430 892.0  
SR 0.827951 0.829538 0.826371 681.0  
macro avg 0.821420 0.821952 0.820934 2077.0  
micro avg 0.827542 0.827542 0.827542 2077.0  
weighted avg 0.827521 0.827524 0.827542 2077.0  
The result of Model Number:Dataset Number:Featuregroup Number:Rescale of 38 : 1 : 9 :  
0

f1-score precision recall support  
AFIB 0.889542 0.897747 0.881701 204.0  
GSVT 0.922063 0.922096 0.922055 300.0  
SB 0.941374 0.939702 0.943060 892.0  
SR 0.931383 0.931134 0.931655 681.0  
macro avg 0.921090 0.922669 0.919618 2077.0  
micro avg 0.930260 0.930260 0.930260 2077.0  
weighted avg 0.930218 0.930229 0.930260 2077.0  
The result of Model Number:Dataset Number:Featuregroup Number:Rescale of 38 : 1 : 9 :  
1

f1-score precision recall support  
AFIB 0.904014 0.912820 0.895597 204.0  
GSVT 0.924919 0.920672 0.929237 300.0  
SB 0.937701 0.934475 0.940956 892.0  
SR 0.929782 0.933389 0.926247 681.0  
macro avg 0.924104 0.925339 0.923009 2077.0  
micro avg 0.929986 0.929986 0.929986 2077.0  
weighted avg 0.929950 0.929998 0.929986 2077.0  
The result of Model Number:Dataset Number:Featuregroup Number:Rescale of 38 : 1 :  
10 : 0

f1-score precision recall support  
AFIB 0.883652 0.888941 0.878471 204.0  
GSVT 0.907192 0.904495 0.909911 300.0  
SB 0.921084 0.919955 0.922218 892.0

SR 0.914369 0.915448 0.913300 681.0  
macro avg 0.906574 0.907210 0.905975 2077.0  
micro avg 0.913220 0.913220 0.913220 2077.0  
weighted avg 0.913199 0.913198 0.913220 2077.0  
The result of Model Number:Dataset Number:Featuregroup Number:Rescale of 38 : 1 :  
10 : 1

f1-score precision recall support  
AFIB 0.768606 0.784759 0.753135 875.0  
GSVT 0.818476 0.821287 0.815723 691.0  
SB 0.891741 0.887538 0.895988 1553.0  
SR 0.844133 0.832891 0.855753 907.0  
macro avg 0.830739 0.831619 0.830150 4026.0  
micro avg 0.842100 0.842100 0.842100 4026.0  
weighted avg 0.841679 0.841518 0.842100 4026.0

The result of Model Number:Dataset Number:Featuregroup Number:Rescale of 39 : 0 : 0 :  
0

f1-score precision recall support  
AFIB 0.647153 0.637409 0.662588 875.0  
GSVT 0.617914 0.616116 0.623185 691.0  
SB 0.659853 0.614878 0.717414 1553.0  
SR 0.488794 0.653373 0.405025 907.0  
macro avg 0.603429 0.630444 0.602053 4026.0  
micro avg 0.618949 0.618949 0.618949 4026.0  
weighted avg 0.611358 0.628659 0.618949 4026.0

The result of Model Number:Dataset Number:Featuregroup Number:Rescale of 39 : 0 : 0 :  
1

f1-score precision recall support  
AFIB 0.880479 0.890773 0.870589 204.0  
GSVT 0.904700 0.900541 0.908924 300.0  
SB 0.917509 0.914656 0.920387 892.0  
SR 0.909608 0.912186 0.907083 681.0  
macro avg 0.903074 0.904539 0.901746 2077.0  
micro avg 0.909478 0.909478 0.909478 2077.0  
weighted avg 0.909431 0.909462 0.909478 2077.0

The result of Model Number:Dataset Number:Featuregroup Number:Rescale of 39 : 0 : 1 :  
0

f1-score precision recall support  
AFIB 0.758937 0.793207 0.727752 204.0  
GSVT 0.785333 0.776513 0.794499 300.0  
SB 0.755461 0.722525 0.808355 892.0  
SR 0.629403 0.634770 0.624233 681.0  
macro avg 0.732284 0.731754 0.738710 2077.0  
micro avg 0.738068 0.738068 0.738068 2077.0  
weighted avg 0.718786 0.708492 0.738068 2077.0

The result of Model Number:Dataset Number:Featuregroup Number:Rescale of 39 : 0 : 1 :  
1

|              | f1-score | precision | recall   | support |
|--------------|----------|-----------|----------|---------|
| AFIB         | 0.790129 | 0.803265  | 0.777597 | 204.0   |
| GSVT         | 0.805280 | 0.799559  | 0.811144 | 300.0   |
| SB           | 0.823958 | 0.819328  | 0.828660 | 892.0   |
| SR           | 0.813461 | 0.818438  | 0.808570 | 681.0   |
| macro avg    | 0.808207 | 0.810148  | 0.806493 | 2077.0  |
| micro avg    | 0.814528 | 0.814528  | 0.814528 | 2077.0  |
| weighted avg | 0.814496 | 0.814603  | 0.814528 | 2077.0  |

The result of Model Number:Dataset Number:Featuregroup Number:Rescale of 39 : 0 : 2 :  
0

|              | f1-score | precision | recall   | support |
|--------------|----------|-----------|----------|---------|
| AFIB         | 0.765780 | 0.763657  | 0.767971 | 875.0   |
| GSVT         | 0.771840 | 0.775521  | 0.768270 | 691.0   |
| SB           | 0.807981 | 0.805399  | 0.810582 | 1553.0  |
| SR           | 0.795063 | 0.798903  | 0.791297 | 907.0   |
| macro avg    | 0.785166 | 0.785870  | 0.784530 | 4026.0  |
| micro avg    | 0.789714 | 0.789714  | 0.789714 | 4026.0  |
| weighted avg | 0.789696 | 0.789735  | 0.789714 | 4026.0  |

The result of Model Number:Dataset Number:Featuregroup Number:Rescale of 39 : 0 : 2 :  
1

|              | f1-score | precision | recall   | support |
|--------------|----------|-----------|----------|---------|
| AFIB         | 0.733732 | 0.783465  | 0.690423 | 204.0   |
| GSVT         | 0.691349 | 0.711861  | 0.672245 | 300.0   |
| SB           | 0.722632 | 0.687942  | 0.761418 | 892.0   |
| SR           | 0.641203 | 0.670314  | 0.615214 | 681.0   |
| macro avg    | 0.697229 | 0.713396  | 0.684825 | 2077.0  |
| micro avg    | 0.693628 | 0.693628  | 0.693628 | 2077.0  |
| weighted avg | 0.692505 | 0.694999  | 0.693628 | 2077.0  |

The result of Model Number:Dataset Number:Featuregroup Number:Rescale of 39 : 0 : 3 :  
0

|              | f1-score | precision | recall   | support |
|--------------|----------|-----------|----------|---------|
| AFIB         | 0.827069 | 0.825738  | 0.828741 | 875.0   |
| GSVT         | 0.846352 | 0.841941  | 0.850859 | 691.0   |
| SB           | 0.884905 | 0.877408  | 0.892539 | 1553.0  |
| SR           | 0.851125 | 0.870047  | 0.833295 | 907.0   |
| macro avg    | 0.852363 | 0.853783  | 0.851359 | 4026.0  |
| micro avg    | 0.858173 | 0.858173  | 0.858173 | 4026.0  |
| weighted avg | 0.858108 | 0.858432  | 0.858173 | 4026.0  |

The result of Model Number:Dataset Number:Featuregroup Number:Rescale of 39 : 0 : 3 :  
1

|      | f1-score | precision | recall   | support |
|------|----------|-----------|----------|---------|
| AFIB | 0.753403 | 0.742811  | 0.764339 | 875.0   |



GSVT 0.769624 0.775399 0.763955 691.0  
SB 0.818407 0.816002 0.820830 1553.0  
SR 0.798248 0.809291 0.787515 907.0  
macro avg 0.784920 0.785876 0.784159 4026.0  
micro avg 0.791285 0.791285 0.791285 4026.0  
weighted avg 0.791365 0.791614 0.791285 4026.0  
The result of Model Number:Dataset Number:Featuregroup Number:Rescale of 39 : 0 : 4 :  
0

f1-score precision recall support  
AFIB 0.841579 0.864678 0.819744 204.0  
GSVT 0.860613 0.847392 0.874335 300.0  
SB 0.879522 0.871014 0.888198 892.0  
SR 0.857293 0.868005 0.846847 681.0  
macro avg 0.859751 0.862772 0.857281 2077.0  
micro avg 0.865914 0.865914 0.865914 2077.0  
weighted avg 0.865775 0.865993 0.865914 2077.0  
The result of Model Number:Dataset Number:Featuregroup Number:Rescale of 39 : 0 : 4 :  
1

f1-score precision recall support  
AFIB 0.688688 0.683210 0.694321 875.0  
GSVT 0.661382 0.648806 0.674509 691.0  
SB 0.694144 0.640755 0.757250 1553.0  
SR 0.531521 0.679628 0.436515 907.0  
macro avg 0.643934 0.663100 0.640649 4026.0  
micro avg 0.657115 0.657115 0.657115 4026.0  
weighted avg 0.650699 0.660121 0.657115 4026.0  
The result of Model Number:Dataset Number:Featuregroup Number:Rescale of 39 : 0 : 5 :  
0

f1-score precision recall support  
AFIB 0.801057 0.791092 0.811366 875.0  
GSVT 0.826137 0.836482 0.816127 691.0  
SB 0.881373 0.880418 0.882336 1553.0  
SR 0.857601 0.861999 0.853252 907.0  
macro avg 0.841542 0.842498 0.840770 4026.0  
micro avg 0.848996 0.848996 0.848996 4026.0  
weighted avg 0.849081 0.849314 0.848996 4026.0  
The result of Model Number:Dataset Number:Featuregroup Number:Rescale of 39 : 0 : 5 :  
1

f1-score precision recall support  
AFIB 0.572892 0.568574 0.650225 204.0  
GSVT 0.694519 0.690407 0.698687 300.0  
SB 0.568020 0.566834 0.569213 892.0  
SR 0.702507 0.701383 0.703644 681.0  
macro avg 0.634484 0.631799 0.655442 2077.0

micro avg 0.639948 0.639948 0.639948 2077.0  
weighted avg 0.630865 0.628969 0.639948 2077.0  
The result of Model Number:Dataset Number:Featuregroup Number:Rescale of 39 : 0 : 6 :  
0

f1-score precision recall support  
AFIB 0.735413 0.742030 0.729143 875.0  
GSVT 0.750393 0.735178 0.766429 691.0  
SB 0.795797 0.786944 0.804947 1553.0  
SR 0.764219 0.786935 0.742956 907.0  
macro avg 0.761455 0.762772 0.760869 4026.0  
micro avg 0.767896 0.767896 0.767896 4026.0  
weighted avg 0.767766 0.768296 0.767896 4026.0

The result of Model Number:Dataset Number:Featuregroup Number:Rescale of 39 : 0 : 6 :  
1

f1-score precision recall support  
AFIB 0.853092 0.847326 0.859052 875.0  
GSVT 0.873904 0.874252 0.873669 691.0  
SB 0.928345 0.925976 0.930736 1553.0  
SR 0.903068 0.913157 0.893211 907.0  
macro avg 0.889602 0.890178 0.889167 4026.0  
micro avg 0.896908 0.896908 0.896908 4026.0  
weighted avg 0.896951 0.897117 0.896908 4026.0

The result of Model Number:Dataset Number:Featuregroup Number:Rescale of 39 : 0 : 7 :  
0

f1-score precision recall support  
AFIB 0.846381 0.882178 0.813658 204.0  
GSVT 0.779456 0.780820 0.789788 300.0  
SB 0.839156 0.799179 0.884157 892.0  
SR 0.741855 0.801606 0.691736 681.0  
macro avg 0.801712 0.815946 0.794835 2077.0  
micro avg 0.800512 0.800512 0.800512 2077.0  
weighted avg 0.799340 0.805475 0.800512 2077.0

The result of Model Number:Dataset Number:Featuregroup Number:Rescale of 39 : 0 : 7 :  
1

f1-score precision recall support  
AFIB 0.683947 0.686256 0.681677 875.0  
GSVT 0.682141 0.677336 0.687076 691.0  
SB 0.717737 0.711076 0.724530 1553.0  
SR 0.690451 0.703757 0.677673 907.0  
macro avg 0.693569 0.694606 0.692739 4026.0  
micro avg 0.698232 0.698232 0.698232 4026.0  
weighted avg 0.698136 0.698242 0.698232 4026.0

The result of Model Number:Dataset Number:Featuregroup Number:Rescale of 39 : 0 : 8 :  
0

f1-score precision recall support  
AFIB 0.780714 0.771462 0.790255 875.0  
GSVT 0.791826 0.799480 0.784394 691.0  
SB 0.840391 0.837176 0.843637 1553.0  
SR 0.820798 0.830268 0.811566 907.0  
macro avg 0.808432 0.809597 0.807463 4026.0  
micro avg 0.814642 0.814642 0.814642 4026.0  
weighted avg 0.814671 0.814868 0.814642 4026.0  
The result of Model Number:Dataset Number:Featuregroup Number:Rescale of 39 : 0 : 8 :  
1

f1-score precision recall support  
AFIB 0.730745 0.719823 0.742031 875.0  
GSVT 0.744756 0.751125 0.738505 691.0  
SB 0.795754 0.793014 0.798519 1553.0  
SR 0.772463 0.783984 0.761302 907.0  
macro avg 0.760930 0.761987 0.760089 4026.0  
micro avg 0.767557 0.767557 0.767557 4026.0  
weighted avg 0.767625 0.767883 0.767557 4026.0  
The result of Model Number:Dataset Number:Featuregroup Number:Rescale of 39 : 0 : 9 :  
0

f1-score precision recall support  
AFIB 0.848171 0.857872 0.839015 204.0  
GSVT 0.868024 0.862888 0.873237 300.0  
SB 0.833287 0.802507 0.885244 892.0  
SR 0.698997 0.702380 0.695664 681.0  
macro avg 0.812120 0.806412 0.823290 2077.0  
micro avg 0.816810 0.816810 0.816810 2077.0  
weighted avg 0.795736 0.783837 0.816810 2077.0  
The result of Model Number:Dataset Number:Featuregroup Number:Rescale of 39 : 0 : 9 :  
1

f1-score precision recall support  
AFIB 0.767543 0.784900 0.750960 875.0  
GSVT 0.813770 0.817233 0.810384 691.0  
SB 0.883585 0.879421 0.887794 1553.0  
SR 0.837185 0.824343 0.850468 907.0  
macro avg 0.825521 0.826474 0.824902 4026.0  
micro avg 0.836360 0.836360 0.836360 4026.0  
weighted avg 0.835929 0.835796 0.836360 4026.0  
The result of Model Number:Dataset Number:Featuregroup Number:Rescale of 39 : 0 :  
10 : 0

f1-score precision recall support  
AFIB 0.841541 0.845409 0.837749 875.0  
GSVT 0.806561 0.811421 0.801787 691.0  
SB 0.865169 0.826604 0.907551 1553.0

SR 0.739909 0.805487 0.684353 907.0  
macro avg 0.813295 0.822231 0.807860 4026.0  
micro avg 0.823944 0.823944 0.823944 4026.0  
weighted avg 0.821755 0.823328 0.823944 4026.0  
The result of Model Number:Dataset Number:Featuregroup Number:Rescale of 39 : 0 :  
10 : 1

f1-score precision recall support  
AFIB 0.678098 0.714985 0.645004 204.0  
GSVT 0.711878 0.701111 0.723009 300.0  
SB 0.728795 0.724054 0.733609 892.0  
SR 0.719803 0.720452 0.719173 681.0  
macro avg 0.709644 0.715151 0.705199 2077.0  
micro avg 0.718642 0.718642 0.718642 2077.0  
weighted avg 0.718424 0.718669 0.718642 2077.0  
The result of Model Number:Dataset Number:Featuregroup Number:Rescale of 39 : 1 : 0 :  
0

f1-score precision recall support  
AFIB 0.710983 0.712215 0.709766 875.0  
GSVT 0.719604 0.711335 0.728126 691.0  
SB 0.757768 0.748631 0.767134 1553.0  
SR 0.721749 0.743618 0.701146 907.0  
macro avg 0.727526 0.728950 0.726543 4026.0  
micro avg 0.733105 0.733105 0.733105 4026.0  
weighted avg 0.732935 0.733186 0.733105 4026.0  
The result of Model Number:Dataset Number:Featuregroup Number:Rescale of 39 : 1 : 0 :  
1

f1-score precision recall support  
AFIB 0.796163 0.799068 0.793331 875.0  
GSVT 0.809924 0.799377 0.820821 691.0  
SB 0.853741 0.844338 0.863361 1553.0  
SR 0.809102 0.831453 0.787965 907.0  
macro avg 0.817232 0.818559 0.816370 4026.0  
micro avg 0.823854 0.823854 0.823854 4026.0  
weighted avg 0.823650 0.823879 0.823854 4026.0  
The result of Model Number:Dataset Number:Featuregroup Number:Rescale of 39 : 1 : 1 :  
0

f1-score precision recall support  
AFIB 0.852108 0.845590 0.858839 875.0  
GSVT 0.871714 0.876480 0.867050 691.0  
SB 0.923074 0.922428 0.923728 1553.0  
SR 0.898556 0.902914 0.894286 907.0  
macro avg 0.886363 0.886853 0.885976 4026.0  
micro avg 0.893265 0.893265 0.893265 4026.0  
weighted avg 0.893312 0.893446 0.893265 4026.0

The result of Model Number:Dataset Number:Featuregroup Number:Rescale of 39 : 1 : 1 : 1

|              | f1-score | precision | recall   | support |
|--------------|----------|-----------|----------|---------|
| AFIB         | 0.754682 | 0.761433  | 0.748143 | 875.0   |
| GSVT         | 0.769095 | 0.754471  | 0.784445 | 691.0   |
| SB           | 0.816331 | 0.809259  | 0.823530 | 1553.0  |
| SR           | 0.782802 | 0.800800  | 0.765629 | 907.0   |
| macro avg    | 0.780727 | 0.781491  | 0.780437 | 4026.0  |
| micro avg    | 0.787393 | 0.787393  | 0.787393 | 4026.0  |
| weighted avg | 0.787271 | 0.787555  | 0.787393 | 4026.0  |

The result of Model Number:Dataset Number:Featuregroup Number:Rescale of 39 : 1 : 2 : 0

|              | f1-score | precision | recall   | support |
|--------------|----------|-----------|----------|---------|
| AFIB         | 0.848507 | 0.850147  | 0.846938 | 875.0   |
| GSVT         | 0.822060 | 0.818449  | 0.825752 | 691.0   |
| SB           | 0.858955 | 0.806747  | 0.918411 | 1553.0  |
| SR           | 0.691338 | 0.801060  | 0.608217 | 907.0   |
| macro avg    | 0.805215 | 0.819101  | 0.799829 | 4026.0  |
| micro avg    | 0.817091 | 0.817091  | 0.817091 | 4026.0  |
| weighted avg | 0.812590 | 0.816907  | 0.817091 | 4026.0  |

The result of Model Number:Dataset Number:Featuregroup Number:Rescale of 39 : 1 : 2 : 1

|              | f1-score | precision | recall   | support |
|--------------|----------|-----------|----------|---------|
| AFIB         | 0.780680 | 0.799238  | 0.763051 | 204.0   |
| GSVT         | 0.800947 | 0.797856  | 0.804146 | 300.0   |
| SB           | 0.820794 | 0.818963  | 0.822634 | 892.0   |
| SR           | 0.810468 | 0.808837  | 0.812134 | 681.0   |
| macro avg    | 0.803222 | 0.806223  | 0.800491 | 2077.0  |
| micro avg    | 0.810669 | 0.810669  | 0.810669 | 2077.0  |
| weighted avg | 0.810602 | 0.810657  | 0.810669 | 2077.0  |

The result of Model Number:Dataset Number:Featuregroup Number:Rescale of 39 : 1 : 3 : 0

|              | f1-score | precision | recall   | support |
|--------------|----------|-----------|----------|---------|
| AFIB         | 0.769884 | 0.784032  | 0.756331 | 204.0   |
| GSVT         | 0.782815 | 0.777689  | 0.788031 | 300.0   |
| SB           | 0.796206 | 0.792318  | 0.800133 | 892.0   |
| SR           | 0.787976 | 0.791252  | 0.784738 | 681.0   |
| macro avg    | 0.784220 | 0.786323  | 0.782308 | 2077.0  |
| micro avg    | 0.789035 | 0.789035  | 0.789035 | 2077.0  |
| weighted avg | 0.788988 | 0.789042  | 0.789035 | 2077.0  |

The result of Model Number:Dataset Number:Featuregroup Number:Rescale of 39 : 1 : 3 : 1

|      | f1-score | precision | recall   | support |
|------|----------|-----------|----------|---------|
| AFIB | 0.686426 | 0.689561  | 0.683357 | 875.0   |

GSVT 0.697869 0.691967 0.703923 691.0  
SB 0.737662 0.730129 0.745355 1553.0  
SR 0.699591 0.714339 0.685477 907.0  
macro avg 0.705387 0.706499 0.704528 4026.0  
micro avg 0.711280 0.711280 0.711280 4026.0  
weighted avg 0.711120 0.711205 0.711280 4026.0  
The result of Model Number:Dataset Number:Featuregroup Number:Rescale of 39 : 1 : 4 :  
0

f1-score precision recall support  
AFIB 0.742018 0.761444 0.723897 204.0  
GSVT 0.698188 0.718480 0.679391 300.0  
SB 0.736738 0.710799 0.764655 892.0  
SR 0.667763 0.689509 0.647480 681.0  
macro avg 0.711177 0.720058 0.703856 2077.0  
micro avg 0.709917 0.709917 0.709917 2077.0  
weighted avg 0.709073 0.709902 0.709917 2077.0  
The result of Model Number:Dataset Number:Featuregroup Number:Rescale of 39 : 1 : 4 :  
1

f1-score precision recall support  
AFIB 0.790193 0.806323 0.775044 204.0  
GSVT 0.818886 0.811771 0.826276 300.0  
SB 0.834630 0.833140 0.836127 892.0  
SR 0.826861 0.827354 0.826374 681.0  
macro avg 0.817643 0.819647 0.815955 2077.0  
micro avg 0.825507 0.825507 0.825507 2077.0  
weighted avg 0.825444 0.825523 0.825507 2077.0  
The result of Model Number:Dataset Number:Featuregroup Number:Rescale of 39 : 1 : 5 :  
0

f1-score precision recall support  
AFIB 0.871742 0.874550 0.869033 875.0  
GSVT 0.883998 0.869963 0.898573 691.0  
SB 0.931435 0.923658 0.939351 1553.0  
SR 0.884615 0.907082 0.863266 907.0  
macro avg 0.892947 0.893813 0.892556 4026.0  
micro avg 0.899929 0.899929 0.899929 4026.0  
weighted avg 0.899772 0.900035 0.899929 4026.0  
The result of Model Number:Dataset Number:Featuregroup Number:Rescale of 39 : 1 : 5 :  
1

f1-score precision recall support  
AFIB 0.730556 0.747246 0.714780 204.0  
GSVT 0.763744 0.758990 0.768577 300.0  
SB 0.780239 0.777819 0.782685 892.0  
SR 0.771303 0.771660 0.770968 681.0  
macro avg 0.761461 0.763929 0.759253 2077.0

micro avg 0.770136 0.770136 0.770136 2077.0  
weighted avg 0.770047 0.770077 0.770136 2077.0  
The result of Model Number:Dataset Number:Featuregroup Number:Rescale of 39 : 1 : 6 :  
0

|              | f1-score | precision | recall   | support |
|--------------|----------|-----------|----------|---------|
| AFIB         | 0.812768 | 0.833038  | 0.793523 | 875.0   |
| GSVT         | 0.864643 | 0.867958  | 0.861394 | 691.0   |
| SB           | 0.936336 | 0.931802  | 0.940917 | 1553.0  |
| SR           | 0.887230 | 0.872442  | 0.902586 | 907.0   |
| macro avg    | 0.875244 | 0.876310  | 0.874605 | 4026.0  |
| micro avg    | 0.886598 | 0.886598  | 0.886598 | 4026.0  |
| weighted avg | 0.886112 | 0.886006  | 0.886598 | 4026.0  |

The result of Model Number:Dataset Number:Featuregroup Number:Rescale of 39 : 1 : 6 :  
1

|              | f1-score | precision | recall   | support |
|--------------|----------|-----------|----------|---------|
| AFIB         | 0.654756 | 0.659946  | 0.649664 | 875.0   |
| GSVT         | 0.663057 | 0.660134  | 0.666029 | 691.0   |
| SB           | 0.705083 | 0.702296  | 0.707898 | 1553.0  |
| SR           | 0.687757 | 0.689700  | 0.685858 | 907.0   |
| macro avg    | 0.677663 | 0.678019  | 0.677362 | 4026.0  |
| micro avg    | 0.683090 | 0.683090  | 0.683090 | 4026.0  |
| weighted avg | 0.683029 | 0.683018  | 0.683090 | 4026.0  |

The result of Model Number:Dataset Number:Featuregroup Number:Rescale of 39 : 1 : 7 :  
0

|              | f1-score | precision | recall   | support |
|--------------|----------|-----------|----------|---------|
| AFIB         | 0.752470 | 0.736390  | 0.769311 | 875.0   |
| GSVT         | 0.779230 | 0.791146  | 0.767738 | 691.0   |
| SB           | 0.830658 | 0.830767  | 0.830551 | 1553.0  |
| SR           | 0.809258 | 0.817638  | 0.801050 | 907.0   |
| macro avg    | 0.792904 | 0.793985  | 0.792163 | 4026.0  |
| micro avg    | 0.799814 | 0.799814  | 0.799814 | 4026.0  |
| weighted avg | 0.800017 | 0.800498  | 0.799814 | 4026.0  |

The result of Model Number:Dataset Number:Featuregroup Number:Rescale of 39 : 1 : 7 :  
1

|              | f1-score | precision | recall   | support |
|--------------|----------|-----------|----------|---------|
| AFIB         | 0.807978 | 0.802517  | 0.813623 | 875.0   |
| GSVT         | 0.827690 | 0.828019  | 0.827467 | 691.0   |
| SB           | 0.879252 | 0.877008  | 0.881516 | 1553.0  |
| SR           | 0.855311 | 0.864867  | 0.845975 | 907.0   |
| macro avg    | 0.842558 | 0.843103  | 0.842145 | 4026.0  |
| micro avg    | 0.849477 | 0.849477  | 0.849477 | 4026.0  |
| weighted avg | 0.849518 | 0.849675  | 0.849477 | 4026.0  |

The result of Model Number:Dataset Number:Featuregroup Number:Rescale of 39 : 1 : 8 :  
0

f1-score precision recall support  
AFIB 0.904302 0.912643 0.896331 204.0  
GSVT 0.937362 0.937396 0.937354 300.0  
SB 0.956993 0.955294 0.958708 892.0  
SR 0.946837 0.946584 0.947114 681.0  
macro avg 0.936374 0.937979 0.934877 2077.0  
micro avg 0.945695 0.945695 0.945695 2077.0  
weighted avg 0.945653 0.945664 0.945695 2077.0  
The result of Model Number:Dataset Number:Featuregroup Number:Rescale of 39 : 1 : 8 :  
1

f1-score precision recall support  
AFIB 0.886017 0.891811 0.880353 204.0  
GSVT 0.908216 0.906124 0.910328 300.0  
SB 0.924428 0.923094 0.925773 892.0  
SR 0.917142 0.918100 0.916202 681.0  
macro avg 0.908951 0.909782 0.908164 2077.0  
micro avg 0.915943 0.915943 0.915943 2077.0  
weighted avg 0.915925 0.915933 0.915943 2077.0  
The result of Model Number:Dataset Number:Featuregroup Number:Rescale of 39 : 1 : 9 :  
0

f1-score precision recall support  
AFIB 0.728307 0.789106 0.677659 204.0  
GSVT 0.781194 0.771371 0.791589 300.0  
SB 0.801137 0.789913 0.812777 892.0  
SR 0.779283 0.782934 0.776046 681.0  
macro avg 0.772480 0.783331 0.764518 2077.0  
micro avg 0.784402 0.784402 0.784402 2077.0  
weighted avg 0.783938 0.784867 0.784402 2077.0  
The result of Model Number:Dataset Number:Featuregroup Number:Rescale of 39 : 1 : 9 :  
1

f1-score precision recall support  
AFIB 0.713769 0.705132 0.722653 875.0  
GSVT 0.723431 0.730848 0.716219 691.0  
SB 0.768357 0.765857 0.770880 1553.0  
SR 0.751551 0.759274 0.744010 907.0  
macro avg 0.739277 0.740278 0.738441 4026.0  
micro avg 0.744964 0.744964 0.744964 4026.0  
weighted avg 0.744996 0.745167 0.744964 4026.0  
The result of Model Number:Dataset Number:Featuregroup Number:Rescale of 39 : 1 :  
10 : 0

f1-score precision recall support  
AFIB 0.714961 0.716424 0.713581 204.0  
GSVT 0.730686 0.727846 0.733600 300.0  
SB 0.746907 0.745910 0.747910 892.0



SR 0.741421 0.743612 0.739244 681.0  
macro avg 0.733493 0.733448 0.733584 2077.0  
micro avg 0.739630 0.739630 0.739630 2077.0  
weighted avg 0.739627 0.739651 0.739630 2077.0  
The result of Model Number:Dataset Number:Featuregroup Number:Rescale of 39 : 1 :

10 : 1

f1-score precision recall support

AFIB 0.883705 0.923610 0.847394 204.0  
GSVT 0.914441 0.904171 0.925113 300.0  
SB 0.879658 0.841307 0.941247 892.0  
SR 0.732876 0.739125 0.726856 681.0  
macro avg 0.852670 0.852053 0.860153 2077.0  
micro avg 0.859405 0.859405 0.859405 2077.0  
weighted avg 0.836953 0.824967 0.859405 2077.0

The result of Model Number:Dataset Number:Featuregroup Number:Rescale of 40 : 0 : 0 : 0

f1-score precision recall support

AFIB 0.839842 0.835613 0.844151 875.0  
GSVT 0.856201 0.860345 0.852109 691.0  
SB 0.911906 0.909807 0.914017 1553.0  
SR 0.889077 0.893834 0.884380 907.0  
macro avg 0.874256 0.874900 0.873664 4026.0  
micro avg 0.881530 0.881530 0.881530 4026.0  
weighted avg 0.881540 0.881594 0.881530 4026.0

The result of Model Number:Dataset Number:Featuregroup Number:Rescale of 40 : 0 : 0 : 1

f1-score precision recall support

AFIB 0.773815 0.775873 0.771815 875.0  
GSVT 0.788695 0.783139 0.794378 691.0  
SB 0.833744 0.825243 0.842439 1553.0  
SR 0.795632 0.812962 0.779054 907.0  
macro avg 0.797972 0.799305 0.796921 4026.0  
micro avg 0.804561 0.804561 0.804561 4026.0  
weighted avg 0.804401 0.804520 0.804561 4026.0

The result of Model Number:Dataset Number:Featuregroup Number:Rescale of 40 : 0 : 1 : 0

f1-score precision recall support

AFIB 0.740431 0.764165 0.718349 204.0  
GSVT 0.762583 0.749463 0.776283 300.0  
SB 0.775774 0.768106 0.783600 892.0  
SR 0.755032 0.764480 0.745831 681.0  
macro avg 0.758455 0.761553 0.756016 2077.0  
micro avg 0.763751 0.763751 0.763751 2077.0  
weighted avg 0.763597 0.763837 0.763751 2077.0

The result of Model Number:Dataset Number:Featuregroup Number:Rescale of 40 : 0 : 1 :  
1

|              | f1-score | precision | recall   | support |
|--------------|----------|-----------|----------|---------|
| AFIB         | 0.658142 | 0.656239  | 0.660116 | 875.0   |
| GSVT         | 0.670340 | 0.669794  | 0.670932 | 691.0   |
| SB           | 0.711998 | 0.709049  | 0.714977 | 1553.0  |
| SR           | 0.690623 | 0.698210  | 0.683236 | 907.0   |
| macro avg    | 0.682776 | 0.683323  | 0.682315 | 4026.0  |
| micro avg    | 0.688343 | 0.688343  | 0.688343 | 4026.0  |
| weighted avg | 0.688327 | 0.688392  | 0.688343 | 4026.0  |

The result of Model Number:Dataset Number:Featuregroup Number:Rescale of 40 : 0 : 2 :  
0

|              | f1-score | precision | recall   | support |
|--------------|----------|-----------|----------|---------|
| AFIB         | 0.828722 | 0.821313  | 0.836303 | 875.0   |
| GSVT         | 0.842028 | 0.845360  | 0.838753 | 691.0   |
| SB           | 0.897782 | 0.896116  | 0.899458 | 1553.0  |
| SR           | 0.875032 | 0.883121  | 0.867122 | 907.0   |
| macro avg    | 0.860891 | 0.861477  | 0.860409 | 4026.0  |
| micro avg    | 0.868028 | 0.868028  | 0.868028 | 4026.0  |
| weighted avg | 0.868078 | 0.868219  | 0.868028 | 4026.0  |

The result of Model Number:Dataset Number:Featuregroup Number:Rescale of 40 : 0 : 2 :  
1

|              | f1-score | precision | recall   | support |
|--------------|----------|-----------|----------|---------|
| AFIB         | 0.705620 | 0.708259  | 0.703300 | 875.0   |
| GSVT         | 0.721503 | 0.728464  | 0.714819 | 691.0   |
| SB           | 0.767183 | 0.759137  | 0.775462 | 1553.0  |
| SR           | 0.740617 | 0.747135  | 0.734466 | 907.0   |
| macro avg    | 0.733731 | 0.735749  | 0.732012 | 4026.0  |
| micro avg    | 0.740134 | 0.740134  | 0.740134 | 4026.0  |
| weighted avg | 0.739978 | 0.740111  | 0.740134 | 4026.0  |

The result of Model Number:Dataset Number:Featuregroup Number:Rescale of 40 : 0 : 3 :  
0

|              | f1-score | precision | recall   | support |
|--------------|----------|-----------|----------|---------|
| AFIB         | 0.913522 | 0.926997  | 0.900532 | 204.0   |
| GSVT         | 0.935947 | 0.932274  | 0.939681 | 300.0   |
| SB           | 0.956734 | 0.954816  | 0.958664 | 892.0   |
| SR           | 0.949948 | 0.950091  | 0.949814 | 681.0   |
| macro avg    | 0.939038 | 0.941045  | 0.937173 | 2077.0  |
| micro avg    | 0.947311 | 0.947311  | 0.947311 | 2077.0  |
| weighted avg | 0.947263 | 0.947279  | 0.947311 | 2077.0  |

The result of Model Number:Dataset Number:Featuregroup Number:Rescale of 40 : 0 : 3 :  
1

|      | f1-score | precision | recall   | support |
|------|----------|-----------|----------|---------|
| AFIB | 0.721172 | 0.714411  | 0.728154 | 875.0   |

GSVT 0.683740 0.667305 0.734002 691.0  
SB 0.790617 0.787714 0.793564 1553.0  
SR 0.614928 0.619240 0.610683 907.0  
macro avg 0.702614 0.697168 0.716601 4026.0  
micro avg 0.727925 0.727925 0.727925 4026.0  
weighted avg 0.717600 0.713161 0.727925 4026.0  
The result of Model Number:Dataset Number:Featuregroup Number:Rescale of 40 : 0 : 4 :  
0

f1-score precision recall support  
AFIB 0.688422 0.717164 0.662020 875.0  
GSVT 0.743736 0.739971 0.747630 691.0  
SB 0.815529 0.810940 0.820193 1553.0  
SR 0.763621 0.746664 0.781378 907.0  
macro avg 0.752827 0.753685 0.752805 4026.0  
micro avg 0.764617 0.764617 0.764617 4026.0  
weighted avg 0.763888 0.763898 0.764617 4026.0  
The result of Model Number:Dataset Number:Featuregroup Number:Rescale of 40 : 0 : 4 :  
1

f1-score precision recall support  
AFIB 0.658097 0.729182 0.599761 204.0  
GSVT 0.762875 0.750468 0.775819 300.0  
SB 0.813559 0.809855 0.817298 892.0  
SR 0.793901 0.783799 0.804279 681.0  
macro avg 0.757108 0.768326 0.749289 2077.0  
micro avg 0.785672 0.785672 0.785672 2077.0  
weighted avg 0.784524 0.784810 0.785672 2077.0  
The result of Model Number:Dataset Number:Featuregroup Number:Rescale of 40 : 0 : 5 :  
0

f1-score precision recall support  
AFIB 0.800579 0.798116 0.803107 875.0  
GSVT 0.780171 0.783997 0.776506 691.0  
SB 0.820178 0.786142 0.857303 1553.0  
SR 0.705832 0.770102 0.651518 907.0  
macro avg 0.776690 0.784589 0.772108 4026.0  
micro avg 0.785296 0.785296 0.785296 4026.0  
weighted avg 0.783291 0.784763 0.785296 4026.0  
The result of Model Number:Dataset Number:Featuregroup Number:Rescale of 40 : 0 : 5 :  
1

f1-score precision recall support  
AFIB 0.849167 0.852343 0.846375 875.0  
GSVT 0.868281 0.876658 0.860237 691.0  
SB 0.923254 0.913571 0.933217 1553.0  
SR 0.891283 0.899127 0.883881 907.0  
macro avg 0.882996 0.885425 0.880927 4026.0

micro avg 0.890702 0.890702 0.890702 4026.0  
weighted avg 0.890514 0.890674 0.890702 4026.0  
The result of Model Number:Dataset Number:Featuregroup Number:Rescale of 40 : 0 : 6 :  
0

|              | f1-score | precision | recall   | support |
|--------------|----------|-----------|----------|---------|
| AFIB         | 0.727369 | 0.734454  | 0.720597 | 204.0   |
| GSVT         | 0.744190 | 0.740772  | 0.747664 | 300.0   |
| SB           | 0.754474 | 0.751878  | 0.757093 | 892.0   |
| SR           | 0.748102 | 0.751004  | 0.745257 | 681.0   |
| macro avg    | 0.743534 | 0.744527  | 0.742653 | 2077.0  |
| micro avg    | 0.748266 | 0.748266  | 0.748266 | 2077.0  |
| weighted avg | 0.748237 | 0.748276  | 0.748266 | 2077.0  |

The result of Model Number:Dataset Number:Featuregroup Number:Rescale of 40 : 0 : 6 :  
1

|              | f1-score | precision | recall   | support |
|--------------|----------|-----------|----------|---------|
| AFIB         | 0.690238 | 0.752751  | 0.638462 | 204.0   |
| GSVT         | 0.801147 | 0.791993  | 0.810763 | 300.0   |
| SB           | 0.849569 | 0.847394  | 0.851759 | 892.0   |
| SR           | 0.828768 | 0.817545  | 0.840327 | 681.0   |
| macro avg    | 0.792431 | 0.802421  | 0.785328 | 2077.0  |
| micro avg    | 0.821140 | 0.821140  | 0.821140 | 2077.0  |
| weighted avg | 0.820106 | 0.820310  | 0.821140 | 2077.0  |

The result of Model Number:Dataset Number:Featuregroup Number:Rescale of 40 : 0 : 7 :  
0

|              | f1-score | precision | recall   | support |
|--------------|----------|-----------|----------|---------|
| AFIB         | 0.743471 | 0.737867  | 0.843830 | 204.0   |
| GSVT         | 0.901312 | 0.895976  | 0.906722 | 300.0   |
| SB           | 0.737148 | 0.735609  | 0.738697 | 892.0   |
| SR           | 0.911679 | 0.910220  | 0.913154 | 681.0   |
| macro avg    | 0.823403 | 0.819918  | 0.850601 | 2077.0  |
| micro avg    | 0.830493 | 0.830493  | 0.830493 | 2077.0  |
| weighted avg | 0.818705 | 0.816245  | 0.830493 | 2077.0  |

The result of Model Number:Dataset Number:Featuregroup Number:Rescale of 40 : 0 : 7 :  
1

|              | f1-score | precision | recall   | support |
|--------------|----------|-----------|----------|---------|
| AFIB         | 0.870812 | 0.865937  | 0.875785 | 875.0   |
| GSVT         | 0.877904 | 0.883083  | 0.872839 | 691.0   |
| SB           | 0.924799 | 0.921905  | 0.927715 | 1553.0  |
| SR           | 0.906491 | 0.912488  | 0.900593 | 907.0   |
| macro avg    | 0.895002 | 0.895853  | 0.894233 | 4026.0  |
| micro avg    | 0.900900 | 0.900900  | 0.900900 | 4026.0  |
| weighted avg | 0.900893 | 0.900956  | 0.900900 | 4026.0  |

The result of Model Number:Dataset Number:Featuregroup Number:Rescale of 40 : 0 : 8 :  
0

f1-score precision recall support  
AFIB 0.853553 0.866353 0.841369 204.0  
GSVT 0.884376 0.882028 0.886742 300.0  
SB 0.905325 0.904119 0.906543 892.0  
SR 0.896470 0.895315 0.897659 681.0  
macro avg 0.884931 0.886954 0.883078 2077.0  
micro avg 0.894368 0.894368 0.894368 2077.0  
weighted avg 0.894311 0.894332 0.894368 2077.0  
The result of Model Number:Dataset Number:Featuregroup Number:Rescale of 40 : 0 : 8 :  
1

f1-score precision recall support  
AFIB 0.660846 0.656524 0.665282 875.0  
GSVT 0.680487 0.686277 0.674885 691.0  
SB 0.724470 0.722893 0.726057 1553.0  
SR 0.706815 0.709653 0.704010 907.0  
macro avg 0.693155 0.693837 0.692558 4026.0  
micro avg 0.699098 0.699098 0.699098 4026.0  
weighted avg 0.699116 0.699201 0.699098 4026.0  
The result of Model Number:Dataset Number:Featuregroup Number:Rescale of 40 : 0 : 9 :  
0

f1-score precision recall support  
AFIB 0.730626 0.758449 0.704933 204.0  
GSVT 0.753904 0.746306 0.761692 300.0  
SB 0.768994 0.765166 0.772872 892.0  
SR 0.759705 0.760183 0.759253 681.0  
macro avg 0.753307 0.757526 0.749687 2077.0  
micro avg 0.760119 0.760119 0.760119 2077.0  
weighted avg 0.760000 0.760148 0.760119 2077.0  
The result of Model Number:Dataset Number:Featuregroup Number:Rescale of 40 : 0 : 9 :  
1

f1-score precision recall support  
AFIB 0.646971 0.682164 0.615395 204.0  
GSVT 0.679200 0.668927 0.689820 300.0  
SB 0.695340 0.690817 0.699933 892.0  
SR 0.686761 0.687380 0.686160 681.0  
macro avg 0.677068 0.682322 0.672827 2077.0  
micro avg 0.685653 0.685653 0.685653 2077.0  
weighted avg 0.685445 0.685678 0.685653 2077.0  
The result of Model Number:Dataset Number:Featuregroup Number:Rescale of 40 : 0 :  
10 : 0

f1-score precision recall support  
AFIB 0.763519 0.756443 0.770772 875.0  
GSVT 0.777231 0.781452 0.773069 691.0  
SB 0.823521 0.821622 0.825429 1553.0

SR 0.804334 0.811756 0.797071 907.0  
macro avg 0.792151 0.792818 0.791585 4026.0  
micro avg 0.798174 0.798174 0.798174 4026.0  
weighted avg 0.798213 0.798339 0.798174 4026.0  
The result of Model Number:Dataset Number:Featuregroup Number:Rescale of 40 : 0 :

10 : 1

f1-score precision recall support

AFIB 0.698011 0.712014 0.684688 204.0  
GSVT 0.714188 0.706764 0.721807 300.0  
SB 0.727397 0.724567 0.730251 892.0  
SR 0.719753 0.722756 0.716791 681.0  
macro avg 0.714837 0.716525 0.713384 2077.0  
micro avg 0.720143 0.720143 0.720143 2077.0  
weighted avg 0.720097 0.720169 0.720143 2077.0

The result of Model Number:Dataset Number:Featuregroup Number:Rescale of 40 : 1 : 0 :  
0

f1-score precision recall support

AFIB 0.771059 0.782882 0.759715 204.0  
GSVT 0.789342 0.782645 0.796188 300.0  
SB 0.803073 0.800481 0.805684 892.0  
SR 0.794821 0.797771 0.791902 681.0  
macro avg 0.789574 0.790945 0.788372 2077.0  
micro avg 0.795279 0.795279 0.795279 2077.0  
weighted avg 0.795240 0.795288 0.795279 2077.0

The result of Model Number:Dataset Number:Featuregroup Number:Rescale of 40 : 1 : 0 :  
1

f1-score precision recall support

AFIB 0.634492 0.625483 0.643835 875.0  
GSVT 0.657502 0.665890 0.649422 691.0  
SB 0.698744 0.697718 0.699779 1553.0  
SR 0.681336 0.686447 0.676303 907.0  
macro avg 0.668019 0.668885 0.667335 4026.0  
micro avg 0.673688 0.673688 0.673688 4026.0  
weighted avg 0.673779 0.674017 0.673688 4026.0

The result of Model Number:Dataset Number:Featuregroup Number:Rescale of 40 : 1 : 1 :  
0

f1-score precision recall support

AFIB 0.683057 0.677832 0.688453 875.0  
GSVT 0.698773 0.702594 0.695034 691.0  
SB 0.739944 0.739426 0.740469 1553.0  
SR 0.720290 0.723784 0.716867 907.0  
macro avg 0.710516 0.710909 0.710206 4026.0  
micro avg 0.716049 0.716049 0.716049 4026.0  
weighted avg 0.716086 0.716194 0.716049 4026.0

The result of Model Number:Dataset Number:Featuregroup Number:Rescale of 40 : 1 : 1 : 1

|              | f1-score | precision | recall   | support |
|--------------|----------|-----------|----------|---------|
| AFIB         | 0.847379 | 0.887949  | 0.810554 | 204.0   |
| GSVT         | 0.892519 | 0.882964  | 0.902315 | 300.0   |
| SB           | 0.911476 | 0.906441  | 0.916580 | 892.0   |
| SR           | 0.901180 | 0.900398  | 0.901978 | 681.0   |
| macro avg    | 0.888138 | 0.894438  | 0.882857 | 2077.0  |
| micro avg    | 0.899318 | 0.899318  | 0.899318 | 2077.0  |
| weighted avg | 0.899067 | 0.899253  | 0.899318 | 2077.0  |

The result of Model Number:Dataset Number:Featuregroup Number:Rescale of 40 : 1 : 2 : 0

|              | f1-score | precision | recall   | support |
|--------------|----------|-----------|----------|---------|
| AFIB         | 0.678263 | 0.662455  | 0.694953 | 875.0   |
| GSVT         | 0.651108 | 0.658265  | 0.644149 | 691.0   |
| SB           | 0.685187 | 0.640942  | 0.736010 | 1553.0  |
| SR           | 0.548385 | 0.658505  | 0.470112 | 907.0   |
| macro avg    | 0.640736 | 0.655042  | 0.636306 | 4026.0  |
| micro avg    | 0.651417 | 0.651417  | 0.651417 | 4026.0  |
| weighted avg | 0.647014 | 0.652547  | 0.651417 | 4026.0  |

The result of Model Number:Dataset Number:Featuregroup Number:Rescale of 40 : 1 : 2 : 1

|              | f1-score | precision | recall   | support |
|--------------|----------|-----------|----------|---------|
| AFIB         | 0.850910 | 0.850143  | 0.851760 | 875.0   |
| GSVT         | 0.865651 | 0.857725  | 0.873793 | 691.0   |
| SB           | 0.908397 | 0.900411  | 0.916528 | 1553.0  |
| SR           | 0.865631 | 0.887031  | 0.845315 | 907.0   |
| macro avg    | 0.872647 | 0.873827  | 0.871849 | 4026.0  |
| micro avg    | 0.879073 | 0.879073  | 0.879073 | 4026.0  |
| weighted avg | 0.878932 | 0.879145  | 0.879073 | 4026.0  |

The result of Model Number:Dataset Number:Featuregroup Number:Rescale of 40 : 1 : 3 : 0

|              | f1-score | precision | recall   | support |
|--------------|----------|-----------|----------|---------|
| AFIB         | 0.814813 | 0.818693  | 0.811006 | 875.0   |
| GSVT         | 0.824879 | 0.809888  | 0.840519 | 691.0   |
| SB           | 0.872784 | 0.869442  | 0.876155 | 1553.0  |
| SR           | 0.846987 | 0.861484  | 0.832982 | 907.0   |
| macro avg    | 0.839866 | 0.839877  | 0.840166 | 4026.0  |
| micro avg    | 0.846153 | 0.846153  | 0.846153 | 4026.0  |
| weighted avg | 0.846151 | 0.846398  | 0.846153 | 4026.0  |

The result of Model Number:Dataset Number:Featuregroup Number:Rescale of 40 : 1 : 3 : 1

|      | f1-score | precision | recall   | support |
|------|----------|-----------|----------|---------|
| AFIB | 0.815021 | 0.816596  | 0.813513 | 875.0   |

GSVT 0.789618 0.786149 0.793164 691.0  
SB 0.825057 0.774909 0.882166 1553.0  
SR 0.664055 0.769446 0.584214 907.0  
macro avg 0.773437 0.786775 0.768264 4026.0  
micro avg 0.784845 0.784845 0.784845 4026.0  
weighted avg 0.780521 0.784668 0.784845 4026.0  
The result of Model Number:Dataset Number:Featuregroup Number:Rescale of 40 : 1 : 4 :  
0

f1-score precision recall support  
AFIB 0.801370 0.819196 0.784475 204.0  
GSVT 0.835513 0.830321 0.840803 300.0  
SB 0.853650 0.851852 0.855466 892.0  
SR 0.844558 0.843961 0.845183 681.0  
macro avg 0.833773 0.836333 0.831482 2077.0  
micro avg 0.843004 0.843004 0.843004 2077.0  
weighted avg 0.842914 0.842947 0.843004 2077.0  
The result of Model Number:Dataset Number:Featuregroup Number:Rescale of 40 : 1 : 4 :  
1

f1-score precision recall support  
AFIB 0.747457 0.767025 0.729204 204.0  
GSVT 0.703306 0.723746 0.684371 300.0  
SB 0.742138 0.716009 0.770260 892.0  
SR 0.672657 0.694564 0.652226 681.0  
macro avg 0.716390 0.725336 0.709015 2077.0  
micro avg 0.715121 0.715121 0.715121 2077.0  
weighted avg 0.714270 0.715106 0.715121 2077.0  
The result of Model Number:Dataset Number:Featuregroup Number:Rescale of 40 : 1 : 5 :  
0

f1-score precision recall support  
AFIB 0.762114 0.767249 0.757160 875.0  
GSVT 0.775715 0.764941 0.786940 691.0  
SB 0.826609 0.820949 0.832355 1553.0  
SR 0.793111 0.806811 0.779912 907.0  
macro avg 0.789387 0.789987 0.789092 4026.0  
micro avg 0.796403 0.796403 0.796403 4026.0  
weighted avg 0.796310 0.796480 0.796403 4026.0  
The result of Model Number:Dataset Number:Featuregroup Number:Rescale of 40 : 1 : 5 :  
1

f1-score precision recall support  
AFIB 0.769136 0.788612 0.750671 204.0  
GSVT 0.785840 0.777294 0.794706 300.0  
SB 0.807974 0.803942 0.812050 892.0  
SR 0.795451 0.799020 0.791946 681.0  
macro avg 0.789600 0.792217 0.787343 2077.0



micro avg 0.796924 0.796924 0.796924 2077.0  
weighted avg 0.796856 0.796973 0.796924 2077.0  
The result of Model Number:Dataset Number:Featuregroup Number:Rescale of 40 : 1 : 6 :  
0

|              | f1-score | precision | recall   | support |
|--------------|----------|-----------|----------|---------|
| AFIB         | 0.669756 | 0.660971  | 0.678809 | 875.0   |
| GSVT         | 0.680010 | 0.687569  | 0.672628 | 691.0   |
| SB           | 0.721238 | 0.719536  | 0.722953 | 1553.0  |
| SR           | 0.703181 | 0.709510  | 0.696974 | 907.0   |
| macro avg    | 0.693546 | 0.694396  | 0.692841 | 4026.0  |
| micro avg    | 0.698869 | 0.698869  | 0.698869 | 4026.0  |
| weighted avg | 0.698905 | 0.699062  | 0.698869 | 4026.0  |

The result of Model Number:Dataset Number:Featuregroup Number:Rescale of 40 : 1 : 6 :  
1

|              | f1-score | precision | recall   | support |
|--------------|----------|-----------|----------|---------|
| AFIB         | 0.860015 | 0.924666  | 0.804711 | 204.0   |
| GSVT         | 0.820170 | 0.846204  | 0.795816 | 300.0   |
| SB           | 0.854502 | 0.812218  | 0.901437 | 892.0   |
| SR           | 0.756426 | 0.788939  | 0.726564 | 681.0   |
| macro avg    | 0.822778 | 0.843007  | 0.807132 | 2077.0  |
| micro avg    | 0.819344 | 0.819344  | 0.819344 | 2077.0  |
| weighted avg | 0.817928 | 0.820539  | 0.819344 | 2077.0  |

The result of Model Number:Dataset Number:Featuregroup Number:Rescale of 40 : 1 : 7 :  
0

|              | f1-score | precision | recall   | support |
|--------------|----------|-----------|----------|---------|
| AFIB         | 0.751747 | 0.757008  | 0.746585 | 204.0   |
| GSVT         | 0.769237 | 0.765445  | 0.773079 | 300.0   |
| SB           | 0.784526 | 0.783220  | 0.785845 | 892.0   |
| SR           | 0.776718 | 0.778562  | 0.774892 | 681.0   |
| macro avg    | 0.770557 | 0.771058  | 0.770100 | 2077.0  |
| micro avg    | 0.776554 | 0.776554  | 0.776554 | 2077.0  |
| weighted avg | 0.776538 | 0.776551  | 0.776554 | 2077.0  |

The result of Model Number:Dataset Number:Featuregroup Number:Rescale of 40 : 1 : 7 :  
1

|              | f1-score | precision | recall   | support |
|--------------|----------|-----------|----------|---------|
| AFIB         | 0.825322 | 0.881264  | 0.776607 | 204.0   |
| GSVT         | 0.777649 | 0.800722  | 0.756161 | 300.0   |
| SB           | 0.812837 | 0.773817  | 0.856465 | 892.0   |
| SR           | 0.721243 | 0.753988  | 0.692010 | 681.0   |
| macro avg    | 0.784263 | 0.802448  | 0.770311 | 2077.0  |
| micro avg    | 0.780213 | 0.780213  | 0.780213 | 2077.0  |
| weighted avg | 0.778949 | 0.781755  | 0.780213 | 2077.0  |

The result of Model Number:Dataset Number:Featuregroup Number:Rescale of 40 : 1 : 8 :  
0

f1-score precision recall support  
AFIB 0.855761 0.858651 0.852922 875.0  
GSVT 0.853501 0.847490 0.859676 691.0  
SB 0.898040 0.889706 0.906539 1553.0  
SR 0.863899 0.880548 0.847911 907.0  
macro avg 0.867801 0.869098 0.866762 4026.0  
micro avg 0.873635 0.873635 0.873635 4026.0  
weighted avg 0.873516 0.873647 0.873635 4026.0  
The result of Model Number:Dataset Number:Featuregroup Number:Rescale of 40 : 1 : 8 :  
1

f1-score precision recall support  
AFIB 0.815393 0.822914 0.808206 204.0  
GSVT 0.845204 0.845234 0.845196 300.0  
SB 0.862905 0.861372 0.864450 892.0  
SR 0.853747 0.853518 0.853996 681.0  
macro avg 0.844312 0.845760 0.842962 2077.0  
micro avg 0.852717 0.852717 0.852717 2077.0  
weighted avg 0.852679 0.852689 0.852717 2077.0  
The result of Model Number:Dataset Number:Featuregroup Number:Rescale of 40 : 1 : 9 :  
0

f1-score precision recall support  
AFIB 0.811388 0.800745 0.822355 875.0  
GSVT 0.823811 0.832968 0.814867 691.0  
SB 0.873757 0.871695 0.875835 1553.0  
SR 0.851881 0.859548 0.844362 907.0  
macro avg 0.840209 0.841239 0.839355 4026.0  
micro avg 0.846657 0.846657 0.846657 4026.0  
weighted avg 0.846701 0.846892 0.846657 4026.0  
The result of Model Number:Dataset Number:Featuregroup Number:Rescale of 40 : 1 : 9 :  
1

f1-score precision recall support  
AFIB 0.825514 0.851975 0.800894 204.0  
GSVT 0.850211 0.835584 0.865485 300.0  
SB 0.864919 0.856369 0.873644 892.0  
SR 0.841793 0.852326 0.831534 681.0  
macro avg 0.845609 0.849064 0.842889 2077.0  
micro avg 0.851513 0.851513 0.851513 2077.0  
weighted avg 0.851342 0.851610 0.851513 2077.0  
The result of Model Number:Dataset Number:Featuregroup Number:Rescale of 40 : 1 :  
10 : 0

f1-score precision recall support  
AFIB 0.865075 0.912132 0.822855 204.0  
GSVT 0.908168 0.894433 0.922369 300.0  
SB 0.929750 0.923702 0.935892 892.0

SR 0.918279 0.919107 0.917475 681.0  
macro avg 0.905318 0.912344 0.899648 2077.0  
micro avg 0.916798 0.916798 0.916798 2077.0  
weighted avg 0.916519 0.916831 0.916798 2077.0  
The result of Model Number:Dataset Number:Featuregroup Number:Rescale of 40 : 1 :

10 : 1

f1-score precision recall support

AFIB 0.753633 0.774841 0.733709 204.0  
GSVT 0.773116 0.767690 0.778766 300.0  
SB 0.794377 0.791198 0.797582 892.0  
SR 0.783818 0.784308 0.783352 681.0  
macro avg 0.776236 0.779509 0.773352 2077.0  
micro avg 0.783925 0.783925 0.783925 2077.0  
weighted avg 0.783842 0.783937 0.783925 2077.0

The result of Model Number:Dataset Number:Featuregroup Number:Rescale of 41 : 0 : 0 :  
0

f1-score precision recall support

AFIB 0.682816 0.751706 0.625893 204.0  
GSVT 0.805240 0.794125 0.816799 300.0  
SB 0.855008 0.852156 0.857884 892.0  
SR 0.833113 0.821587 0.844978 681.0  
macro avg 0.794044 0.804893 0.786388 2077.0  
micro avg 0.824932 0.824932 0.824932 2077.0  
weighted avg 0.823728 0.823885 0.824932 2077.0

The result of Model Number:Dataset Number:Featuregroup Number:Rescale of 41 : 0 : 0 :  
1

f1-score precision recall support

AFIB 0.752081 0.738022 0.766767 875.0  
GSVT 0.778426 0.790715 0.766610 691.0  
SB 0.827823 0.826343 0.829314 1553.0  
SR 0.806781 0.815328 0.798416 907.0  
macro avg 0.791278 0.792602 0.790277 4026.0  
micro avg 0.797997 0.797997 0.797997 4026.0  
weighted avg 0.798143 0.798551 0.797997 4026.0

The result of Model Number:Dataset Number:Featuregroup Number:Rescale of 41 : 0 : 1 :  
0

f1-score precision recall support

AFIB 0.706115 0.716379 0.696460 204.0  
GSVT 0.721687 0.711924 0.731781 300.0  
SB 0.732549 0.724915 0.740352 892.0  
SR 0.718030 0.729912 0.706541 681.0  
macro avg 0.719595 0.720782 0.718783 2077.0  
micro avg 0.723717 0.723717 0.723717 2077.0  
weighted avg 0.723624 0.723838 0.723717 2077.0

The result of Model Number:Dataset Number:Featuregroup Number:Rescale of 41 : 0 : 1 : 1

|              | f1-score | precision | recall   | support |
|--------------|----------|-----------|----------|---------|
| AFIB         | 0.609746 | 0.622560  | 0.597473 | 875.0   |
| GSVT         | 0.649308 | 0.651539  | 0.647125 | 691.0   |
| SB           | 0.707431 | 0.704097  | 0.710800 | 1553.0  |
| SR           | 0.669663 | 0.660744  | 0.678881 | 907.0   |
| macro avg    | 0.659037 | 0.659735  | 0.658570 | 4026.0  |
| micro avg    | 0.668050 | 0.668050  | 0.668050 | 4026.0  |
| weighted avg | 0.667716 | 0.667588  | 0.668050 | 4026.0  |

The result of Model Number:Dataset Number:Featuregroup Number:Rescale of 41 : 0 : 2 : 0

|              | f1-score | precision | recall   | support |
|--------------|----------|-----------|----------|---------|
| AFIB         | 0.805223 | 0.822993  | 0.788263 | 204.0   |
| GSVT         | 0.822820 | 0.809175  | 0.837031 | 300.0   |
| SB           | 0.838631 | 0.832072  | 0.845304 | 892.0   |
| SR           | 0.818278 | 0.828127  | 0.808663 | 681.0   |
| macro avg    | 0.821238 | 0.823092  | 0.819815 | 2077.0  |
| micro avg    | 0.826493 | 0.826493  | 0.826493 | 2077.0  |
| weighted avg | 0.826393 | 0.826579  | 0.826493 | 2077.0  |

The result of Model Number:Dataset Number:Featuregroup Number:Rescale of 41 : 0 : 2 : 1

|              | f1-score | precision | recall   | support |
|--------------|----------|-----------|----------|---------|
| AFIB         | 0.818100 | 0.808271  | 0.828201 | 875.0   |
| GSVT         | 0.833835 | 0.840586  | 0.827197 | 691.0   |
| SB           | 0.888803 | 0.885402  | 0.892236 | 1553.0  |
| SR           | 0.867964 | 0.879062  | 0.857153 | 907.0   |
| macro avg    | 0.852176 | 0.853330  | 0.851197 | 4026.0  |
| micro avg    | 0.859252 | 0.859252  | 0.859252 | 4026.0  |
| weighted avg | 0.859308 | 0.859518  | 0.859252 | 4026.0  |

The result of Model Number:Dataset Number:Featuregroup Number:Rescale of 41 : 0 : 3 : 0

|              | f1-score | precision | recall   | support |
|--------------|----------|-----------|----------|---------|
| AFIB         | 0.731828 | 0.768393  | 0.698953 | 204.0   |
| GSVT         | 0.753891 | 0.739920  | 0.768663 | 300.0   |
| SB           | 0.771144 | 0.763370  | 0.779093 | 892.0   |
| SR           | 0.749757 | 0.756454  | 0.743245 | 681.0   |
| macro avg    | 0.751655 | 0.757034  | 0.747488 | 2077.0  |
| micro avg    | 0.757962 | 0.757962  | 0.757962 | 2077.0  |
| weighted avg | 0.757778 | 0.758209  | 0.757962 | 2077.0  |

The result of Model Number:Dataset Number:Featuregroup Number:Rescale of 41 : 0 : 3 : 1

|      | f1-score | precision | recall   | support |
|------|----------|-----------|----------|---------|
| AFIB | 0.853838 | 0.872859  | 0.835874 | 204.0   |

GSVT 0.864372 0.851713 0.877774 300.0  
SB 0.883905 0.875121 0.892906 892.0  
SR 0.867600 0.880061 0.855513 681.0  
macro avg 0.867429 0.869938 0.865517 2077.0  
micro avg 0.872858 0.872858 0.872858 2077.0  
weighted avg 0.872785 0.873137 0.872858 2077.0  
The result of Model Number:Dataset Number:Featuregroup Number:Rescale of 41 : 0 : 4 :  
0

f1-score precision recall support  
AFIB 0.755500 0.756768 0.774225 204.0  
GSVT 0.748397 0.777440 0.722411 300.0  
SB 0.793838 0.750303 0.843061 892.0  
SR 0.688088 0.751589 0.636224 681.0  
macro avg 0.746456 0.759025 0.743980 2077.0  
micro avg 0.751056 0.751056 0.751056 2077.0  
weighted avg 0.748836 0.755279 0.751056 2077.0  
The result of Model Number:Dataset Number:Featuregroup Number:Rescale of 41 : 0 : 4 :  
1

f1-score precision recall support  
AFIB 0.734846 0.726178 0.743760 875.0  
GSVT 0.747294 0.752023 0.742652 691.0  
SB 0.796760 0.795688 0.797837 1553.0  
SR 0.777186 0.784549 0.769986 907.0  
macro avg 0.764021 0.764610 0.763559 4026.0  
micro avg 0.770338 0.770338 0.770338 4026.0  
weighted avg 0.770404 0.770577 0.770338 4026.0  
The result of Model Number:Dataset Number:Featuregroup Number:Rescale of 41 : 0 : 5 :  
0

f1-score precision recall support  
AFIB 0.658011 0.644723 0.671912 875.0  
GSVT 0.679828 0.690637 0.669498 691.0  
SB 0.723346 0.723306 0.723393 1553.0  
SR 0.705809 0.712240 0.699504 907.0  
macro avg 0.691749 0.692726 0.691077 4026.0  
micro avg 0.697572 0.697572 0.697572 4026.0  
weighted avg 0.697726 0.698127 0.697572 4026.0  
The result of Model Number:Dataset Number:Featuregroup Number:Rescale of 41 : 0 : 5 :  
1

f1-score precision recall support  
AFIB 0.710870 0.723911 0.698345 204.0  
GSVT 0.720245 0.712977 0.727678 300.0  
SB 0.737987 0.734145 0.741873 892.0  
SR 0.727940 0.732501 0.723451 681.0  
macro avg 0.724260 0.725883 0.722837 2077.0

micro avg 0.729507 0.729507 0.729507 2077.0  
weighted avg 0.729467 0.729543 0.729507 2077.0  
The result of Model Number:Dataset Number:Featuregroup Number:Rescale of 41 : 0 : 6 :  
0

|              | f1-score | precision | recall   | support |
|--------------|----------|-----------|----------|---------|
| AFIB         | 0.826362 | 0.842283  | 0.811423 | 204.0   |
| GSVT         | 0.841880 | 0.828201  | 0.856171 | 300.0   |
| SB           | 0.855935 | 0.845727  | 0.866395 | 892.0   |
| SR           | 0.840012 | 0.855762  | 0.824847 | 681.0   |
| macro avg    | 0.841047 | 0.842993  | 0.839709 | 2077.0  |
| micro avg    | 0.845896 | 0.845896  | 0.845896 | 2077.0  |
| weighted avg | 0.845780 | 0.846147  | 0.845896 | 2077.0  |

The result of Model Number:Dataset Number:Featuregroup Number:Rescale of 41 : 0 : 6 :  
1

|              | f1-score | precision | recall   | support |
|--------------|----------|-----------|----------|---------|
| AFIB         | 0.813736 | 0.815193  | 0.812309 | 875.0   |
| GSVT         | 0.779207 | 0.783300  | 0.775178 | 691.0   |
| SB           | 0.824211 | 0.778872  | 0.875163 | 1553.0  |
| SR           | 0.684511 | 0.770468  | 0.615870 | 907.0   |
| macro avg    | 0.775416 | 0.786958  | 0.769630 | 4026.0  |
| micro avg    | 0.785927 | 0.785927  | 0.785927 | 4026.0  |
| weighted avg | 0.782738 | 0.785633  | 0.785927 | 4026.0  |

The result of Model Number:Dataset Number:Featuregroup Number:Rescale of 41 : 0 : 7 :  
0

|              | f1-score | precision | recall   | support |
|--------------|----------|-----------|----------|---------|
| AFIB         | 0.722149 | 0.729847  | 0.714730 | 204.0   |
| GSVT         | 0.735430 | 0.731396  | 0.739591 | 300.0   |
| SB           | 0.752406 | 0.751152  | 0.753669 | 892.0   |
| SR           | 0.746134 | 0.747349  | 0.744932 | 681.0   |
| macro avg    | 0.739030 | 0.739936  | 0.738231 | 2077.0  |
| micro avg    | 0.744946 | 0.744946  | 0.744946 | 2077.0  |
| weighted avg | 0.744926 | 0.744959  | 0.744946 | 2077.0  |

The result of Model Number:Dataset Number:Featuregroup Number:Rescale of 41 : 0 : 7 :  
1

|              | f1-score | precision | recall   | support |
|--------------|----------|-----------|----------|---------|
| AFIB         | 0.700963 | 0.694550  | 0.707526 | 875.0   |
| GSVT         | 0.709944 | 0.716208  | 0.703895 | 691.0   |
| SB           | 0.754648 | 0.750669  | 0.758680 | 1553.0  |
| SR           | 0.737589 | 0.746477  | 0.728976 | 907.0   |
| macro avg    | 0.725786 | 0.726976  | 0.724769 | 4026.0  |
| micro avg    | 0.731467 | 0.731467  | 0.731467 | 4026.0  |
| weighted avg | 0.731464 | 0.731613  | 0.731467 | 4026.0  |

The result of Model Number:Dataset Number:Featuregroup Number:Rescale of 41 : 0 : 8 :  
0

f1-score precision recall support  
AFIB 0.589928 0.642634 0.622977 204.0  
GSVT 0.801285 0.788187 0.815103 300.0  
SB 0.682141 0.676946 0.687468 892.0  
SR 0.834148 0.824710 0.843829 681.0  
macro avg 0.726876 0.733119 0.742344 2077.0  
micro avg 0.750837 0.750837 0.750837 2077.0  
weighted avg 0.740133 0.738092 0.750837 2077.0  
The result of Model Number:Dataset Number:Featuregroup Number:Rescale of 41 : 0 : 8 :  
1

f1-score precision recall support  
AFIB 0.794858 0.812134 0.778520 204.0  
GSVT 0.827669 0.822787 0.832633 300.0  
SB 0.845451 0.843576 0.847344 892.0  
SR 0.836976 0.836503 0.837469 681.0  
macro avg 0.826239 0.828750 0.823991 2077.0  
micro avg 0.835222 0.835222 0.835222 2077.0  
weighted avg 0.835135 0.835166 0.835222 2077.0  
The result of Model Number:Dataset Number:Featuregroup Number:Rescale of 41 : 0 : 9 :  
0

f1-score precision recall support  
AFIB 0.737924 0.765283 0.712559 204.0  
GSVT 0.760031 0.750528 0.769875 300.0  
SB 0.779304 0.772193 0.786554 892.0  
SR 0.758816 0.764705 0.753024 681.0  
macro avg 0.759019 0.763177 0.755503 2077.0  
micro avg 0.765883 0.765883 0.765883 2077.0  
weighted avg 0.765738 0.765930 0.765883 2077.0  
The result of Model Number:Dataset Number:Featuregroup Number:Rescale of 41 : 0 : 9 :  
1

f1-score precision recall support  
AFIB 0.879202 0.883217 0.875271 875.0  
GSVT 0.893859 0.886299 0.901613 691.0  
SB 0.944827 0.935179 0.954681 1553.0  
SR 0.896064 0.914954 0.877986 907.0  
macro avg 0.903488 0.904912 0.902388 4026.0  
micro avg 0.911036 0.911036 0.911036 4026.0  
weighted avg 0.910831 0.910940 0.911036 4026.0  
The result of Model Number:Dataset Number:Featuregroup Number:Rescale of 41 : 0 :  
10 : 0

f1-score precision recall support  
AFIB 0.792116 0.794438 0.789868 875.0  
GSVT 0.805223 0.794880 0.815942 691.0  
SB 0.852194 0.850123 0.854279 1553.0

SR 0.830615 0.840473 0.820995 907.0  
macro avg 0.820037 0.819979 0.820271 4026.0  
micro avg 0.826202 0.826202 0.826202 4026.0  
weighted avg 0.826214 0.826365 0.826202 4026.0  
The result of Model Number:Dataset Number:Featuregroup Number:Rescale of 41 : 0 :  
10 : 1

f1-score precision recall support  
AFIB 0.717376 0.699019 0.736790 875.0  
GSVT 0.678142 0.716577 0.643778 691.0  
SB 0.719068 0.661716 0.787324 1553.0  
SR 0.574414 0.697701 0.488259 907.0  
macro avg 0.672250 0.693753 0.664038 4026.0  
micro avg 0.684329 0.684329 0.684329 4026.0  
weighted avg 0.679088 0.687346 0.684329 4026.0  
The result of Model Number:Dataset Number:Featuregroup Number:Rescale of 41 : 1 : 0 :  
0

f1-score precision recall support  
AFIB 0.865877 0.897979 0.836113 204.0  
GSVT 0.891817 0.880666 0.903367 300.0  
SB 0.914431 0.906088 0.922938 892.0  
SR 0.890390 0.897300 0.883595 681.0  
macro avg 0.890629 0.895508 0.886503 2077.0  
micro avg 0.898684 0.898684 0.898684 2077.0  
weighted avg 0.898514 0.898738 0.898684 2077.0  
The result of Model Number:Dataset Number:Featuregroup Number:Rescale of 41 : 1 : 0 :  
1

f1-score precision recall support  
AFIB 0.733455 0.714187 0.779371 875.0  
GSVT 0.705577 0.667837 0.804343 691.0  
SB 0.668571 0.664345 0.672870 1553.0  
SR 0.649410 0.660600 0.638775 907.0  
macro avg 0.689253 0.676742 0.723840 4026.0  
micro avg 0.710901 0.710901 0.710901 4026.0  
weighted avg 0.684707 0.674933 0.710901 4026.0  
The result of Model Number:Dataset Number:Featuregroup Number:Rescale of 41 : 1 : 1 :  
0

f1-score precision recall support  
AFIB 0.702903 0.790353 0.633498 204.0  
GSVT 0.833943 0.816136 0.852583 300.0  
SB 0.890250 0.885712 0.894839 892.0  
SR 0.870278 0.859257 0.881641 681.0  
macro avg 0.824344 0.837864 0.815640 2077.0  
micro avg 0.858740 0.858740 0.858740 2077.0  
weighted avg 0.857168 0.857622 0.858740 2077.0



The result of Model Number:Dataset Number:Featuregroup Number:Rescale of 41 : 1 : 1 : 1

|              | f1-score | precision | recall   | support |
|--------------|----------|-----------|----------|---------|
| AFIB         | 0.768363 | 0.779652  | 0.757468 | 204.0   |
| GSVT         | 0.787831 | 0.781133  | 0.794661 | 300.0   |
| SB           | 0.801447 | 0.798241  | 0.804681 | 892.0   |
| SR           | 0.793521 | 0.797416  | 0.789673 | 681.0   |
| macro avg    | 0.787791 | 0.789110  | 0.786621 | 2077.0  |
| micro avg    | 0.793676 | 0.793676  | 0.793676 | 2077.0  |
| weighted avg | 0.793632 | 0.793673  | 0.793676 | 2077.0  |

The result of Model Number:Dataset Number:Featuregroup Number:Rescale of 41 : 1 : 2 : 0

|              | f1-score | precision | recall   | support |
|--------------|----------|-----------|----------|---------|
| AFIB         | 0.848195 | 0.880494  | 0.818367 | 204.0   |
| GSVT         | 0.875219 | 0.866397  | 0.884260 | 300.0   |
| SB           | 0.892737 | 0.888293  | 0.897238 | 892.0   |
| SR           | 0.881953 | 0.882508  | 0.881428 | 681.0   |
| macro avg    | 0.874526 | 0.879423  | 0.870323 | 2077.0  |
| micro avg    | 0.882433 | 0.882433  | 0.882433 | 2077.0  |
| weighted avg | 0.882296 | 0.882468  | 0.882433 | 2077.0  |

The result of Model Number:Dataset Number:Featuregroup Number:Rescale of 41 : 1 : 2 : 1

|              | f1-score | precision | recall   | support |
|--------------|----------|-----------|----------|---------|
| AFIB         | 0.849060 | 0.875211  | 0.824597 | 204.0   |
| GSVT         | 0.870721 | 0.860062  | 0.881743 | 300.0   |
| SB           | 0.894371 | 0.889057  | 0.899779 | 892.0   |
| SR           | 0.879296 | 0.883632  | 0.875035 | 681.0   |
| macro avg    | 0.873362 | 0.876990  | 0.870288 | 2077.0  |
| micro avg    | 0.881677 | 0.881677  | 0.881677 | 2077.0  |
| weighted avg | 0.881562 | 0.881730  | 0.881677 | 2077.0  |

The result of Model Number:Dataset Number:Featuregroup Number:Rescale of 41 : 1 : 3 : 0

|              | f1-score | precision | recall   | support |
|--------------|----------|-----------|----------|---------|
| AFIB         | 0.800963 | 0.802046  | 0.800035 | 875.0   |
| GSVT         | 0.813438 | 0.813020  | 0.813887 | 691.0   |
| SB           | 0.849552 | 0.846512  | 0.852616 | 1553.0  |
| SR           | 0.829208 | 0.833856  | 0.824665 | 907.0   |
| macro avg    | 0.823290 | 0.823858  | 0.822801 | 4026.0  |
| micro avg    | 0.828244 | 0.828244  | 0.828244 | 4026.0  |
| weighted avg | 0.828210 | 0.828248  | 0.828244 | 4026.0  |

The result of Model Number:Dataset Number:Featuregroup Number:Rescale of 41 : 1 : 3 : 1

|      | f1-score | precision | recall   | support |
|------|----------|-----------|----------|---------|
| AFIB | 0.741310 | 0.757594  | 0.725989 | 204.0   |

GSVT 0.765201 0.759016 0.771592 300.0  
SB 0.781238 0.780277 0.782202 892.0  
SR 0.774642 0.773969 0.775322 681.0  
macro avg 0.765598 0.767714 0.763776 2077.0  
micro avg 0.772892 0.772892 0.772892 2077.0  
weighted avg 0.772837 0.772910 0.772892 2077.0  
The result of Model Number:Dataset Number:Featuregroup Number:Rescale of 41 : 1 : 4 :  
0

f1-score precision recall support  
AFIB 0.825103 0.818958 0.831423 875.0  
GSVT 0.840491 0.843492 0.837562 691.0  
SB 0.891864 0.889751 0.893988 1553.0  
SR 0.871511 0.879357 0.863835 907.0  
macro avg 0.857242 0.857890 0.856702 4026.0  
micro avg 0.863913 0.863913 0.863913 4026.0  
weighted avg 0.863952 0.864084 0.863913 4026.0  
The result of Model Number:Dataset Number:Featuregroup Number:Rescale of 41 : 1 : 4 :  
1

f1-score precision recall support  
AFIB 0.856885 0.853401 0.860420 875.0  
GSVT 0.869411 0.874666 0.864251 691.0  
SB 0.916957 0.915841 0.918079 1553.0  
SR 0.897828 0.899250 0.896436 907.0  
macro avg 0.885270 0.885789 0.884797 4026.0  
micro avg 0.891433 0.891433 0.891433 4026.0  
weighted avg 0.891431 0.891466 0.891433 4026.0  
The result of Model Number:Dataset Number:Featuregroup Number:Rescale of 41 : 1 : 5 :  
0

f1-score precision recall support  
AFIB 0.867001 0.912651 0.825933 204.0  
GSVT 0.910538 0.902563 0.918696 300.0  
SB 0.934165 0.928398 0.940021 892.0  
SR 0.921420 0.919551 0.923318 681.0  
macro avg 0.908281 0.915791 0.901992 2077.0  
micro avg 0.920259 0.920259 0.920259 2077.0  
weighted avg 0.919977 0.920219 0.920259 2077.0  
The result of Model Number:Dataset Number:Featuregroup Number:Rescale of 41 : 1 : 5 :  
1

f1-score precision recall support  
AFIB 0.735748 0.733485 0.738071 875.0  
GSVT 0.716992 0.720509 0.713625 691.0  
SB 0.753760 0.722481 0.787878 1553.0  
SR 0.648673 0.707739 0.598758 907.0  
macro avg 0.713794 0.721053 0.709583 4026.0

micro avg 0.721703 0.721703 0.721703 4026.0  
weighted avg 0.719860 0.721213 0.721703 4026.0  
The result of Model Number:Dataset Number:Featuregroup Number:Rescale of 41 : 1 : 6 :  
0

|              | f1-score | precision | recall   | support |
|--------------|----------|-----------|----------|---------|
| AFIB         | 0.167908 | 0.169671  | 0.166181 | 175.0   |
| GSVT         | 0.168178 | 0.166392  | 0.170004 | 138.2   |
| SB           | 0.177121 | 0.176442  | 0.177806 | 310.6   |
| SR           | 0.173022 | 0.173889  | 0.172164 | 181.4   |
| macro avg    | 0.171557 | 0.171599  | 0.171538 | 805.2   |
| micro avg    | 0.172669 | 0.172669  | 0.172669 | 805.2   |
| weighted avg | 0.172660 | 0.172670  | 0.172669 | 805.2   |

The result of Model Number:Dataset Number:Featuregroup Number:Rescale of 41 : 1 : 6 :  
1

|              | f1-score | precision | recall   | support |
|--------------|----------|-----------|----------|---------|
| AFIB         | 0.854374 | 0.916128  | 0.801008 | 204.0   |
| GSVT         | 0.809270 | 0.813647  | 0.805270 | 300.0   |
| SB           | 0.845298 | 0.794611  | 0.902911 | 892.0   |
| SR           | 0.742235 | 0.801038  | 0.691570 | 681.0   |
| macro avg    | 0.812794 | 0.831356  | 0.800190 | 2077.0  |
| micro avg    | 0.809505 | 0.809505  | 0.809505 | 2077.0  |
| weighted avg | 0.807193 | 0.811403  | 0.809505 | 2077.0  |

The result of Model Number:Dataset Number:Featuregroup Number:Rescale of 41 : 1 : 7 :  
0

|              | f1-score | precision | recall   | support |
|--------------|----------|-----------|----------|---------|
| AFIB         | 0.666965 | 0.658465  | 0.675710 | 875.0   |
| GSVT         | 0.636830 | 0.641212  | 0.632524 | 691.0   |
| SB           | 0.674289 | 0.635324  | 0.718360 | 1553.0  |
| SR           | 0.549905 | 0.636226  | 0.484241 | 907.0   |
| macro avg    | 0.631997 | 0.642807  | 0.627709 | 4026.0  |
| micro avg    | 0.641614 | 0.641614  | 0.641614 | 4026.0  |
| weighted avg | 0.638246 | 0.641567  | 0.641614 | 4026.0  |

The result of Model Number:Dataset Number:Featuregroup Number:Rescale of 41 : 1 : 7 :  
1

|              | f1-score | precision | recall   | support |
|--------------|----------|-----------|----------|---------|
| AFIB         | 0.640197 | 0.641434  | 0.639013 | 875.0   |
| GSVT         | 0.620243 | 0.617518  | 0.623029 | 691.0   |
| SB           | 0.648080 | 0.608689  | 0.692939 | 1553.0  |
| SR           | 0.521613 | 0.604398  | 0.458899 | 907.0   |
| macro avg    | 0.607533 | 0.618010  | 0.603470 | 4026.0  |
| micro avg    | 0.616494 | 0.616494  | 0.616494 | 4026.0  |
| weighted avg | 0.613098 | 0.616355  | 0.616494 | 4026.0  |

The result of Model Number:Dataset Number:Featuregroup Number:Rescale of 41 : 1 : 8 :  
0

f1-score precision recall support  
AFIB 0.890312 0.907565 0.874104 204.0  
GSVT 0.924837 0.917104 0.932872 300.0  
SB 0.942093 0.940203 0.943994 892.0  
SR 0.933110 0.934077 0.932150 681.0  
macro avg 0.922588 0.924737 0.920780 2077.0  
micro avg 0.931639 0.931639 0.931639 2077.0  
weighted avg 0.931570 0.931652 0.931639 2077.0  
The result of Model Number:Dataset Number:Featuregroup Number:Rescale of 41 : 1 : 8 :  
1

f1-score precision recall support  
AFIB 0.696131 0.710733 0.682136 204.0  
GSVT 0.712280 0.708065 0.716552 300.0  
SB 0.729644 0.727936 0.731362 892.0  
SR 0.723481 0.723273 0.723696 681.0  
macro avg 0.715384 0.717502 0.713436 2077.0  
micro avg 0.721874 0.721874 0.721874 2077.0  
weighted avg 0.721824 0.721847 0.721874 2077.0  
The result of Model Number:Dataset Number:Featuregroup Number:Rescale of 41 : 1 : 9 :  
0

f1-score precision recall support  
AFIB 0.829443 0.817781 0.841482 875.0  
GSVT 0.847301 0.853658 0.841060 691.0  
SB 0.901008 0.898360 0.903675 1553.0  
SR 0.878814 0.890972 0.866997 907.0  
macro avg 0.864141 0.865193 0.863303 4026.0  
micro avg 0.871148 0.871148 0.871148 4026.0  
weighted avg 0.871236 0.871510 0.871148 4026.0  
The result of Model Number:Dataset Number:Featuregroup Number:Rescale of 41 : 1 : 9 :  
1

f1-score precision recall support  
AFIB 0.741707 0.792350 0.697465 204.0  
GSVT 0.784058 0.768080 0.800783 300.0  
SB 0.803505 0.796461 0.810705 892.0  
SR 0.783685 0.786295 0.781163 681.0  
macro avg 0.778239 0.785797 0.772529 2077.0  
micro avg 0.788463 0.788463 0.788463 2077.0  
weighted avg 0.788128 0.788625 0.788463 2077.0  
The result of Model Number:Dataset Number:Featuregroup Number:Rescale of 41 : 1 :  
10 : 0

f1-score precision recall support  
AFIB 0.805672 0.784508 0.856110 875.0  
GSVT 0.775049 0.733594 0.883540 691.0  
SB 0.734399 0.729758 0.739122 1553.0

SR 0.713353 0.725644 0.701670 907.0  
macro avg 0.757119 0.743376 0.795111 4026.0  
micro avg 0.780898 0.780898 0.780898 4026.0  
weighted avg 0.752125 0.741389 0.780898 4026.0  
The result of Model Number:Dataset Number:Featuregroup Number:Rescale of 41 : 1 :  
10 : 1

f1-score precision recall support  
AFIB 0.884371 0.921774 0.850179 204.0  
GSVT 0.814442 0.815867 0.825238 300.0  
SB 0.876821 0.835050 0.923842 892.0  
SR 0.775153 0.837586 0.722785 681.0  
macro avg 0.837697 0.852570 0.830511 2077.0  
micro avg 0.836443 0.836443 0.836443 2077.0  
weighted avg 0.835218 0.841629 0.836443 2077.0

The result of Model Number:Dataset Number:Featuregroup Number:Rescale of 42 : 0 : 0 :  
0

f1-score precision recall support  
AFIB 0.686005 0.691216 0.680931 204.0  
GSVT 0.700050 0.693212 0.707039 300.0  
SB 0.716379 0.714548 0.718226 892.0  
SR 0.708780 0.712784 0.704829 681.0  
macro avg 0.702804 0.702940 0.702756 2077.0  
micro avg 0.708555 0.708555 0.708555 2077.0  
weighted avg 0.708546 0.708596 0.708555 2077.0

The result of Model Number:Dataset Number:Featuregroup Number:Rescale of 42 : 0 : 0 :  
1

f1-score precision recall support  
AFIB 0.671402 0.681306 0.661855 204.0  
GSVT 0.687884 0.685185 0.690628 300.0  
SB 0.703162 0.701752 0.704580 892.0  
SR 0.698174 0.698280 0.698075 681.0  
macro avg 0.690156 0.691631 0.688785 2077.0  
micro avg 0.696236 0.696236 0.696236 2077.0  
weighted avg 0.696201 0.696212 0.696236 2077.0

The result of Model Number:Dataset Number:Featuregroup Number:Rescale of 42 : 0 : 1 :  
0

f1-score precision recall support  
AFIB 0.695865 0.703271 0.688997 204.0  
GSVT 0.716315 0.711542 0.721362 300.0  
SB 0.731452 0.730798 0.732108 892.0  
SR 0.725284 0.726252 0.724324 681.0  
macro avg 0.717229 0.717966 0.716698 2077.0  
micro avg 0.723769 0.723769 0.723769 2077.0  
weighted avg 0.723748 0.723823 0.723769 2077.0

The result of Model Number:Dataset Number:Featuregroup Number:Rescale of 42 : 0 : 1 :  
1

|              | f1-score | precision | recall   | support |
|--------------|----------|-----------|----------|---------|
| AFIB         | 0.798263 | 0.788673  | 0.808119 | 875.0   |
| GSVT         | 0.813617 | 0.820204  | 0.807139 | 691.0   |
| SB           | 0.867252 | 0.863933  | 0.870601 | 1553.0  |
| SR           | 0.846918 | 0.857747  | 0.836369 | 907.0   |
| macro avg    | 0.831512 | 0.832639  | 0.830557 | 4026.0  |
| micro avg    | 0.838417 | 0.838417  | 0.838417 | 4026.0  |
| weighted avg | 0.838471 | 0.838677  | 0.838417 | 4026.0  |

The result of Model Number:Dataset Number:Featuregroup Number:Rescale of 42 : 0 : 2 :  
0

|              | f1-score | precision | recall   | support |
|--------------|----------|-----------|----------|---------|
| AFIB         | 0.835980 | 0.841994  | 0.830054 | 875.0   |
| GSVT         | 0.834648 | 0.829651  | 0.839720 | 691.0   |
| SB           | 0.880432 | 0.870677  | 0.890410 | 1553.0  |
| SR           | 0.844842 | 0.859915  | 0.830317 | 907.0   |
| macro avg    | 0.848976 | 0.850559  | 0.847625 | 4026.0  |
| micro avg    | 0.855054 | 0.855054  | 0.855054 | 4026.0  |
| weighted avg | 0.854895 | 0.854977  | 0.855054 | 4026.0  |

The result of Model Number:Dataset Number:Featuregroup Number:Rescale of 42 : 0 : 2 :  
1

|              | f1-score | precision | recall   | support |
|--------------|----------|-----------|----------|---------|
| AFIB         | 0.765921 | 0.846907  | 0.699469 | 204.0   |
| GSVT         | 0.881292 | 0.871093  | 0.891901 | 300.0   |
| SB           | 0.931771 | 0.927939  | 0.935636 | 892.0   |
| SR           | 0.911761 | 0.898256  | 0.925688 | 681.0   |
| macro avg    | 0.872686 | 0.886049  | 0.863174 | 2077.0  |
| micro avg    | 0.902861 | 0.902861  | 0.902861 | 2077.0  |
| weighted avg | 0.901630 | 0.902037  | 0.902861 | 2077.0  |

The result of Model Number:Dataset Number:Featuregroup Number:Rescale of 42 : 0 : 3 :  
0

|              | f1-score | precision | recall   | support |
|--------------|----------|-----------|----------|---------|
| AFIB         | 0.772192 | 0.778057  | 0.766481 | 204.0   |
| GSVT         | 0.788001 | 0.780305  | 0.795868 | 300.0   |
| SB           | 0.806382 | 0.804321  | 0.808461 | 892.0   |
| SR           | 0.797829 | 0.802335  | 0.793382 | 681.0   |
| macro avg    | 0.791101 | 0.791255  | 0.791048 | 2077.0  |
| micro avg    | 0.797575 | 0.797575  | 0.797575 | 2077.0  |
| weighted avg | 0.797565 | 0.797622  | 0.797575 | 2077.0  |

The result of Model Number:Dataset Number:Featuregroup Number:Rescale of 42 : 0 : 3 :  
1

|      | f1-score | precision | recall   | support |
|------|----------|-----------|----------|---------|
| AFIB | 0.739849 | 0.754691  | 0.725727 | 204.0   |

GSVT 0.756995 0.749127 0.765071 300.0  
SB 0.770996 0.767996 0.774020 892.0  
SR 0.762894 0.766077 0.759755 681.0  
macro avg 0.757683 0.759473 0.756143 2077.0  
micro avg 0.763307 0.763307 0.763307 2077.0  
weighted avg 0.763258 0.763335 0.763307 2077.0  
The result of Model Number:Dataset Number:Featuregroup Number:Rescale of 42 : 0 : 4 :  
0

f1-score precision recall support  
AFIB 0.805339 0.799896 0.810966 875.0  
GSVT 0.824987 0.825315 0.824765 691.0  
SB 0.876380 0.874144 0.878637 1553.0  
SR 0.852517 0.862042 0.843212 907.0  
macro avg 0.839806 0.840349 0.839395 4026.0  
micro avg 0.846703 0.846703 0.846703 4026.0  
weighted avg 0.846743 0.846900 0.846703 4026.0  
The result of Model Number:Dataset Number:Featuregroup Number:Rescale of 42 : 0 : 4 :  
1

f1-score precision recall support  
AFIB 0.846952 0.875078 0.820899 204.0  
GSVT 0.879094 0.872041 0.886394 300.0  
SB 0.898517 0.894825 0.902242 892.0  
SR 0.890125 0.889994 0.890256 681.0  
macro avg 0.878672 0.882985 0.874948 2077.0  
micro avg 0.888034 0.888034 0.888034 2077.0  
weighted avg 0.887895 0.888011 0.888034 2077.0  
The result of Model Number:Dataset Number:Featuregroup Number:Rescale of 42 : 0 : 5 :  
0

f1-score precision recall support  
AFIB 0.863967 0.875167 0.853280 204.0  
GSVT 0.897397 0.896817 0.898005 300.0  
SB 0.916306 0.914371 0.918255 892.0  
SR 0.907090 0.906575 0.907625 681.0  
macro avg 0.896190 0.898232 0.894291 2077.0  
micro avg 0.905463 0.905463 0.905463 2077.0  
weighted avg 0.905412 0.905429 0.905463 2077.0  
The result of Model Number:Dataset Number:Featuregroup Number:Rescale of 42 : 0 : 5 :  
1

f1-score precision recall support  
AFIB 0.669640 0.738470 0.612957 204.0  
GSVT 0.796852 0.786083 0.807998 300.0  
SB 0.848590 0.845196 0.852014 892.0  
SR 0.825558 0.814398 0.837064 681.0  
macro avg 0.785160 0.796037 0.777508 2077.0

micro avg 0.817275 0.817275 0.817275 2077.0  
weighted avg 0.815989 0.816078 0.817275 2077.0  
The result of Model Number:Dataset Number:Featuregroup Number:Rescale of 42 : 0 : 6 :  
0

f1-score precision recall support  
AFIB 0.824013 0.850777 0.799043 204.0  
GSVT 0.846763 0.835966 0.858012 300.0  
SB 0.870652 0.867369 0.873969 892.0  
SR 0.858475 0.860029 0.856959 681.0  
macro avg 0.849975 0.853535 0.846996 2077.0  
micro avg 0.858728 0.858728 0.858728 2077.0  
weighted avg 0.858628 0.858797 0.858728 2077.0

The result of Model Number:Dataset Number:Featuregroup Number:Rescale of 42 : 0 : 6 :  
1

f1-score precision recall support  
AFIB 0.797299 0.795285 0.799448 875.0  
GSVT 0.812854 0.808385 0.817417 691.0  
SB 0.851123 0.845991 0.856328 1553.0  
SR 0.826028 0.840937 0.811654 907.0  
macro avg 0.821826 0.822650 0.821212 4026.0  
micro avg 0.827223 0.827223 0.827223 4026.0  
weighted avg 0.827203 0.827378 0.827223 4026.0

The result of Model Number:Dataset Number:Featuregroup Number:Rescale of 42 : 0 : 7 :  
0

f1-score precision recall support  
AFIB 0.883232 0.901262 0.866299 204.0  
GSVT 0.915303 0.907351 0.923563 300.0  
SB 0.932901 0.931236 0.934574 892.0  
SR 0.924218 0.924769 0.923673 681.0  
macro avg 0.913913 0.916154 0.912027 2077.0  
micro avg 0.922704 0.922704 0.922704 2077.0  
weighted avg 0.922634 0.922721 0.922704 2077.0

The result of Model Number:Dataset Number:Featuregroup Number:Rescale of 42 : 0 : 7 :  
1

f1-score precision recall support  
AFIB 0.792388 0.777576 0.807861 875.0  
GSVT 0.820145 0.833093 0.807696 691.0  
SB 0.872189 0.870630 0.873761 1553.0  
SR 0.850020 0.859025 0.841206 907.0  
macro avg 0.833685 0.835081 0.832631 4026.0  
micro avg 0.840765 0.840765 0.840765 4026.0  
weighted avg 0.840918 0.841349 0.840765 4026.0

The result of Model Number:Dataset Number:Featuregroup Number:Rescale of 42 : 0 : 8 :  
0



f1-score precision recall support  
AFIB 0.707579 0.708946 0.706270 875.0  
GSVT 0.685524 0.682513 0.688604 691.0  
SB 0.716292 0.672755 0.765872 1553.0  
SR 0.576514 0.668012 0.507199 907.0  
macro avg 0.671477 0.683057 0.666986 4026.0  
micro avg 0.681381 0.681381 0.681381 4026.0  
weighted avg 0.677627 0.681227 0.681381 4026.0  
The result of Model Number:Dataset Number:Featuregroup Number:Rescale of 42 : 0 : 8 :  
1

f1-score precision recall support  
AFIB 0.628942 0.676222 0.588498 204.0  
GSVT 0.599803 0.618842 0.581992 300.0  
SB 0.624910 0.593987 0.659235 892.0  
SR 0.553186 0.576963 0.531347 681.0  
macro avg 0.601710 0.616504 0.590268 2077.0  
micro avg 0.599199 0.599199 0.599199 2077.0  
weighted avg 0.598163 0.600072 0.599199 2077.0  
The result of Model Number:Dataset Number:Featuregroup Number:Rescale of 42 : 0 : 9 :  
0

f1-score precision recall support  
AFIB 0.813845 0.816467 0.811316 875.0  
GSVT 0.825287 0.812185 0.838894 691.0  
SB 0.869574 0.862314 0.876964 1553.0  
SR 0.825863 0.846838 0.805933 907.0  
macro avg 0.833643 0.834451 0.833277 4026.0  
micro avg 0.840160 0.840160 0.840160 4026.0  
weighted avg 0.840014 0.840259 0.840160 4026.0  
The result of Model Number:Dataset Number:Featuregroup Number:Rescale of 42 : 0 : 9 :  
1

f1-score precision recall support  
AFIB 0.823580 0.859724 0.790560 204.0  
GSVT 0.766699 0.772220 0.761572 300.0  
SB 0.795128 0.755199 0.839518 892.0  
SR 0.705403 0.751977 0.664411 681.0  
macro avg 0.772703 0.784780 0.764015 2077.0  
micro avg 0.766037 0.766037 0.766037 2077.0  
weighted avg 0.764397 0.766867 0.766037 2077.0  
The result of Model Number:Dataset Number:Featuregroup Number:Rescale of 42 : 0 :  
10 : 0

f1-score precision recall support  
AFIB 0.791432 0.784433 0.798591 875.0  
GSVT 0.719549 0.696829 0.800513 691.0  
SB 0.648713 0.622854 0.689151 1553.0

SR 0.668592 0.675511 0.661858 907.0  
macro avg 0.707072 0.694906 0.737528 4026.0  
micro avg 0.725901 0.725901 0.725901 4026.0  
weighted avg 0.696368 0.682530 0.725901 4026.0  
The result of Model Number:Dataset Number:Featuregroup Number:Rescale of 42 : 0 :  
10 : 1

f1-score precision recall support  
AFIB 0.631220 0.625031 0.674900 204.0  
GSVT 0.565985 0.559693 0.572563 300.0  
SB 0.727326 0.722030 0.732706 892.0  
SR 0.715128 0.720081 0.710301 681.0  
macro avg 0.659915 0.656709 0.672618 2077.0  
micro avg 0.696551 0.696551 0.696551 2077.0  
weighted avg 0.690584 0.688416 0.696551 2077.0

The result of Model Number:Dataset Number:Featuregroup Number:Rescale of 42 : 1 : 0 :  
0

f1-score precision recall support  
AFIB 0.849816 0.885758 0.816960 204.0  
GSVT 0.782619 0.783989 0.792994 300.0  
SB 0.842562 0.802423 0.887745 892.0  
SR 0.744866 0.804860 0.694544 681.0  
macro avg 0.804966 0.819257 0.798061 2077.0  
micro avg 0.803761 0.803761 0.803761 2077.0  
weighted avg 0.802584 0.808744 0.803761 2077.0

The result of Model Number:Dataset Number:Featuregroup Number:Rescale of 42 : 1 : 0 :  
1

f1-score precision recall support  
AFIB 0.735388 0.735343 0.735478 875.0  
GSVT 0.736979 0.732995 0.741020 691.0  
SB 0.772188 0.767050 0.777405 1553.0  
SR 0.751684 0.764016 0.739770 907.0  
macro avg 0.749060 0.749851 0.748418 4026.0  
micro avg 0.753569 0.753569 0.753569 4026.0  
weighted avg 0.753528 0.753630 0.753569 4026.0

The result of Model Number:Dataset Number:Featuregroup Number:Rescale of 42 : 1 : 1 :  
0

f1-score precision recall support  
AFIB 0.747711 0.762060 0.733934 875.0  
GSVT 0.797036 0.798252 0.795873 691.0  
SB 0.867870 0.864056 0.871724 1553.0  
SR 0.820110 0.811195 0.829308 907.0  
macro avg 0.808182 0.808891 0.807710 4026.0  
micro avg 0.819203 0.819203 0.819203 4026.0  
weighted avg 0.818838 0.818685 0.819203 4026.0

The result of Model Number:Dataset Number:Featuregroup Number:Rescale of 42 : 1 : 1 : 1

|              | f1-score | precision | recall   | support |
|--------------|----------|-----------|----------|---------|
| AFIB         | 0.676308 | 0.685453  | 0.667686 | 204.0   |
| GSVT         | 0.701996 | 0.700857  | 0.703164 | 300.0   |
| SB           | 0.717241 | 0.716286  | 0.718205 | 892.0   |
| SR           | 0.709910 | 0.709000  | 0.710847 | 681.0   |
| macro avg    | 0.701364 | 0.702899  | 0.699976 | 2077.0  |
| micro avg    | 0.708658 | 0.708658  | 0.708658 | 2077.0  |
| weighted avg | 0.708615 | 0.708640  | 0.708658 | 2077.0  |

The result of Model Number:Dataset Number:Featuregroup Number:Rescale of 42 : 1 : 2 : 0

|              | f1-score | precision | recall   | support |
|--------------|----------|-----------|----------|---------|
| AFIB         | 0.727664 | 0.732899  | 0.722505 | 875.0   |
| GSVT         | 0.726505 | 0.722155  | 0.730919 | 691.0   |
| SB           | 0.766356 | 0.757865  | 0.775041 | 1553.0  |
| SR           | 0.735378 | 0.748498  | 0.722734 | 907.0   |
| macro avg    | 0.738976 | 0.740354  | 0.737800 | 4026.0  |
| micro avg    | 0.744266 | 0.744266  | 0.744266 | 4026.0  |
| weighted avg | 0.744128 | 0.744199  | 0.744266 | 4026.0  |

The result of Model Number:Dataset Number:Featuregroup Number:Rescale of 42 : 1 : 2 : 1

|              | f1-score | precision | recall   | support |
|--------------|----------|-----------|----------|---------|
| AFIB         | 0.803955 | 0.818710  | 0.790110 | 204.0   |
| GSVT         | 0.834474 | 0.827765  | 0.841446 | 300.0   |
| SB           | 0.849954 | 0.848437  | 0.851479 | 892.0   |
| SR           | 0.841538 | 0.842287  | 0.840795 | 681.0   |
| macro avg    | 0.832480 | 0.834300  | 0.830958 | 2077.0  |
| micro avg    | 0.840499 | 0.840499  | 0.840499 | 2077.0  |
| weighted avg | 0.840441 | 0.840515  | 0.840499 | 2077.0  |

The result of Model Number:Dataset Number:Featuregroup Number:Rescale of 42 : 1 : 3 : 0

|              | f1-score | precision | recall   | support |
|--------------|----------|-----------|----------|---------|
| AFIB         | 0.766910 | 0.747284  | 0.787664 | 875.0   |
| GSVT         | 0.724966 | 0.766055  | 0.688229 | 691.0   |
| SB           | 0.768718 | 0.707406  | 0.841687 | 1553.0  |
| SR           | 0.614076 | 0.745876  | 0.521972 | 907.0   |
| macro avg    | 0.718668 | 0.741655  | 0.709888 | 4026.0  |
| micro avg    | 0.731580 | 0.731580  | 0.731580 | 4026.0  |
| weighted avg | 0.725977 | 0.734806  | 0.731580 | 4026.0  |

The result of Model Number:Dataset Number:Featuregroup Number:Rescale of 42 : 1 : 3 : 1

|      | f1-score | precision | recall   | support |
|------|----------|-----------|----------|---------|
| AFIB | 0.750275 | 0.765258  | 0.735982 | 204.0   |

GSVT 0.758701 0.749221 0.768538 300.0  
SB 0.773186 0.765793 0.780724 892.0  
SR 0.759144 0.769103 0.749461 681.0  
macro avg 0.760326 0.762344 0.758676 2077.0  
micro avg 0.764319 0.764319 0.764319 2077.0  
weighted avg 0.764239 0.764432 0.764319 2077.0  
The result of Model Number:Dataset Number:Featuregroup Number:Rescale of 42 : 1 : 4 :  
0

f1-score precision recall support  
AFIB 0.666369 0.670014 0.662787 875.0  
GSVT 0.663194 0.657602 0.668948 691.0  
SB 0.697514 0.690908 0.704250 1553.0  
SR 0.671555 0.684082 0.659487 907.0  
macro avg 0.674658 0.675651 0.673868 4026.0  
micro avg 0.679095 0.679095 0.679095 4026.0  
weighted avg 0.679006 0.679113 0.679095 4026.0  
The result of Model Number:Dataset Number:Featuregroup Number:Rescale of 42 : 1 : 4 :  
1

f1-score precision recall support  
AFIB 0.758618 0.781624 0.736959 875.0  
GSVT 0.809836 0.804219 0.815574 691.0  
SB 0.886059 0.882669 0.889480 1553.0  
SR 0.837998 0.825421 0.851014 907.0  
macro avg 0.823128 0.823483 0.823257 4026.0  
micro avg 0.834981 0.834981 0.834981 4026.0  
weighted avg 0.834451 0.834346 0.834981 4026.0  
The result of Model Number:Dataset Number:Featuregroup Number:Rescale of 42 : 1 : 5 :  
0

f1-score precision recall support  
AFIB 0.755096 0.776346 0.735133 204.0  
GSVT 0.774617 0.769180 0.780278 300.0  
SB 0.795919 0.792735 0.799131 892.0  
SR 0.785340 0.785831 0.784873 681.0  
macro avg 0.777743 0.781023 0.774854 2077.0  
micro avg 0.785447 0.785447 0.785447 2077.0  
weighted avg 0.785364 0.785459 0.785447 2077.0  
The result of Model Number:Dataset Number:Featuregroup Number:Rescale of 42 : 1 : 5 :  
1

f1-score precision recall support  
AFIB 0.869501 0.872170 0.866986 204.0  
GSVT 0.892342 0.890075 0.894701 300.0  
SB 0.912276 0.911162 0.913399 892.0  
SR 0.904809 0.906549 0.903084 681.0  
macro avg 0.894732 0.894989 0.894543 2077.0

micro avg 0.902758 0.902758 0.902758 2077.0  
weighted avg 0.902747 0.902774 0.902758 2077.0  
The result of Model Number:Dataset Number:Featuregroup Number:Rescale of 42 : 1 : 6 :  
0

|              | f1-score | precision | recall   | support |
|--------------|----------|-----------|----------|---------|
| AFIB         | 0.716650 | 0.724614  | 0.709228 | 204.0   |
| GSVT         | 0.738849 | 0.734643  | 0.743318 | 300.0   |
| SB           | 0.753547 | 0.752538  | 0.754561 | 892.0   |
| SR           | 0.747137 | 0.748138  | 0.746149 | 681.0   |
| macro avg    | 0.739046 | 0.739983  | 0.738314 | 2077.0  |
| micro avg    | 0.745726 | 0.745726  | 0.745726 | 2077.0  |
| weighted avg | 0.745699 | 0.745768  | 0.745726 | 2077.0  |

The result of Model Number:Dataset Number:Featuregroup Number:Rescale of 42 : 1 : 6 :  
1

|              | f1-score | precision | recall   | support |
|--------------|----------|-----------|----------|---------|
| AFIB         | 0.750803 | 0.743251  | 0.758531 | 875.0   |
| GSVT         | 0.757522 | 0.764266  | 0.750951 | 691.0   |
| SB           | 0.801425 | 0.798965  | 0.803901 | 1553.0  |
| SR           | 0.785905 | 0.792784  | 0.779147 | 907.0   |
| macro avg    | 0.773914 | 0.774817  | 0.773132 | 4026.0  |
| micro avg    | 0.779375 | 0.779375  | 0.779375 | 4026.0  |
| weighted avg | 0.779391 | 0.779508  | 0.779375 | 4026.0  |

The result of Model Number:Dataset Number:Featuregroup Number:Rescale of 42 : 1 : 7 :  
0

|              | f1-score | precision | recall   | support |
|--------------|----------|-----------|----------|---------|
| AFIB         | 0.688817 | 0.702165  | 0.676276 | 204.0   |
| GSVT         | 0.715528 | 0.709545  | 0.721744 | 300.0   |
| SB           | 0.728879 | 0.727416  | 0.730349 | 892.0   |
| SR           | 0.721929 | 0.722677  | 0.721186 | 681.0   |
| macro avg    | 0.713788 | 0.715451  | 0.712389 | 2077.0  |
| micro avg    | 0.720791 | 0.720791  | 0.720791 | 2077.0  |
| weighted avg | 0.720737 | 0.720801  | 0.720791 | 2077.0  |

The result of Model Number:Dataset Number:Featuregroup Number:Rescale of 42 : 1 : 7 :  
1

|              | f1-score | precision | recall   | support |
|--------------|----------|-----------|----------|---------|
| AFIB         | 0.838240 | 0.845739  | 0.830977 | 875.0   |
| GSVT         | 0.854249 | 0.838006  | 0.871299 | 691.0   |
| SB           | 0.906714 | 0.898859  | 0.914711 | 1553.0  |
| SR           | 0.869473 | 0.889465  | 0.850399 | 907.0   |
| macro avg    | 0.867169 | 0.868017  | 0.866847 | 4026.0  |
| micro avg    | 0.874573 | 0.874573  | 0.874573 | 4026.0  |
| weighted avg | 0.874438 | 0.874753  | 0.874573 | 4026.0  |

The result of Model Number:Dataset Number:Featuregroup Number:Rescale of 42 : 1 : 8 :  
0

f1-score precision recall support  
AFIB 0.711187 0.789273 0.647333 204.0  
GSVT 0.830408 0.820026 0.841218 300.0  
SB 0.883513 0.879004 0.888068 892.0  
SR 0.862815 0.850753 0.875229 681.0  
macro avg 0.821981 0.834764 0.812962 2077.0  
micro avg 0.853447 0.853447 0.853447 2077.0  
weighted avg 0.852131 0.852409 0.853447 2077.0  
The result of Model Number:Dataset Number:Featuregroup Number:Rescale of 42 : 1 : 8 :  
1

f1-score precision recall support  
AFIB 0.664493 0.678488 0.651168 204.0  
GSVT 0.685152 0.678893 0.691544 300.0  
SB 0.696342 0.694790 0.697904 892.0  
SR 0.688067 0.688786 0.687357 681.0  
macro avg 0.683514 0.685239 0.681993 2077.0  
micro avg 0.688937 0.688937 0.688937 2077.0  
weighted avg 0.688885 0.688924 0.688937 2077.0  
The result of Model Number:Dataset Number:Featuregroup Number:Rescale of 42 : 1 : 9 :  
0

f1-score precision recall support  
AFIB 0.817731 0.831326 0.804761 204.0  
GSVT 0.833411 0.827490 0.839479 300.0  
SB 0.852742 0.847949 0.857608 892.0  
SR 0.841878 0.847028 0.836816 681.0  
macro avg 0.836440 0.838448 0.834666 2077.0  
micro avg 0.842982 0.842982 0.842982 2077.0  
weighted avg 0.842949 0.843059 0.842982 2077.0  
The result of Model Number:Dataset Number:Featuregroup Number:Rescale of 42 : 1 : 9 :  
1

f1-score precision recall support  
AFIB 0.901706 0.918984 0.885296 204.0  
GSVT 0.930380 0.925588 0.935309 300.0  
SB 0.953389 0.951905 0.954886 892.0  
SR 0.943995 0.943057 0.944964 681.0  
macro avg 0.932368 0.934883 0.930114 2077.0  
micro avg 0.941970 0.941970 0.941970 2077.0  
weighted avg 0.941910 0.941969 0.941970 2077.0  
The result of Model Number:Dataset Number:Featuregroup Number:Rescale of 42 : 1 :  
10 : 0

f1-score precision recall support  
AFIB 0.648555 0.650456 0.646715 875.0  
GSVT 0.659286 0.650819 0.668063 691.0  
SB 0.697745 0.696049 0.699452 1553.0

SR 0.680077 0.688148 0.672200 907.0  
macro avg 0.671416 0.671368 0.671608 4026.0  
micro avg 0.676463 0.676463 0.676463 4026.0  
weighted avg 0.676473 0.676597 0.676463 4026.0  
The result of Model Number:Dataset Number:Featuregroup Number:Rescale of 42 : 1 :  
10 : 1

f1-score precision recall support  
AFIB 0.845912 0.869718 0.823548 204.0  
GSVT 0.867781 0.861690 0.874123 300.0  
SB 0.891645 0.888077 0.895243 892.0  
SR 0.879794 0.880343 0.879270 681.0  
macro avg 0.871283 0.874957 0.868046 2077.0  
micro avg 0.879914 0.879914 0.879914 2077.0  
weighted avg 0.879821 0.879927 0.879914 2077.0

The result of Model Number:Dataset Number:Featuregroup Number:Rescale of 43 : 0 : 0 :  
0

f1-score precision recall support  
AFIB 0.807574 0.822435 0.793651 204.0  
GSVT 0.837369 0.830356 0.844647 300.0  
SB 0.853092 0.851663 0.854527 892.0  
SR 0.845560 0.846311 0.844815 681.0  
macro avg 0.835899 0.837691 0.834410 2077.0  
micro avg 0.843936 0.843936 0.843936 2077.0  
weighted avg 0.843881 0.843960 0.843936 2077.0

The result of Model Number:Dataset Number:Featuregroup Number:Rescale of 43 : 0 : 0 :  
1

f1-score precision recall support  
AFIB 0.659201 0.695060 0.627029 204.0  
GSVT 0.692039 0.681572 0.702860 300.0  
SB 0.708485 0.703876 0.713165 892.0  
SR 0.699744 0.700374 0.699131 681.0  
macro avg 0.689867 0.695221 0.685546 2077.0  
micro avg 0.698615 0.698615 0.698615 2077.0  
weighted avg 0.698403 0.698640 0.698615 2077.0

The result of Model Number:Dataset Number:Featuregroup Number:Rescale of 43 : 0 : 1 :  
0

f1-score precision recall support  
AFIB 0.773282 0.791792 0.756749 204.0  
GSVT 0.796053 0.784837 0.807927 300.0  
SB 0.816737 0.808439 0.825244 892.0  
SR 0.797216 0.808727 0.786091 681.0  
macro avg 0.795822 0.798449 0.794003 2077.0  
micro avg 0.803178 0.803178 0.803178 2077.0  
weighted avg 0.803081 0.803489 0.803178 2077.0

The result of Model Number:Dataset Number:Featuregroup Number:Rescale of 43 : 0 : 1 : 1

|              | f1-score | precision | recall   | support |
|--------------|----------|-----------|----------|---------|
| AFIB         | 0.679079 | 0.684448  | 0.673817 | 875.0   |
| GSVT         | 0.696167 | 0.694695  | 0.697671 | 691.0   |
| SB           | 0.742134 | 0.735575  | 0.748821 | 1553.0  |
| SR           | 0.722378 | 0.729463  | 0.715447 | 907.0   |
| macro avg    | 0.709940 | 0.711045  | 0.708939 | 4026.0  |
| micro avg    | 0.716222 | 0.716222  | 0.716222 | 4026.0  |
| weighted avg | 0.716090 | 0.716070  | 0.716222 | 4026.0  |

The result of Model Number:Dataset Number:Featuregroup Number:Rescale of 43 : 0 : 2 : 0

|              | f1-score | precision | recall   | support |
|--------------|----------|-----------|----------|---------|
| AFIB         | 0.751255 | 0.766326  | 0.736915 | 204.0   |
| GSVT         | 0.768666 | 0.760676  | 0.776866 | 300.0   |
| SB           | 0.782882 | 0.779836  | 0.785953 | 892.0   |
| SR           | 0.774655 | 0.777887  | 0.771468 | 681.0   |
| macro avg    | 0.769364 | 0.771181  | 0.767801 | 2077.0  |
| micro avg    | 0.775075 | 0.775075  | 0.775075 | 2077.0  |
| weighted avg | 0.775025 | 0.775103  | 0.775075 | 2077.0  |

The result of Model Number:Dataset Number:Featuregroup Number:Rescale of 43 : 0 : 2 : 1

|              | f1-score | precision | recall   | support |
|--------------|----------|-----------|----------|---------|
| AFIB         | 0.912590 | 0.938272  | 0.888464 | 204.0   |
| GSVT         | 0.936183 | 0.929612  | 0.943025 | 300.0   |
| SB           | 0.961928 | 0.958079  | 0.965810 | 892.0   |
| SR           | 0.949142 | 0.949736  | 0.948578 | 681.0   |
| macro avg    | 0.939961 | 0.943925  | 0.936469 | 2077.0  |
| micro avg    | 0.949272 | 0.949272  | 0.949272 | 2077.0  |
| weighted avg | 0.949171 | 0.949286  | 0.949272 | 2077.0  |

The result of Model Number:Dataset Number:Featuregroup Number:Rescale of 43 : 0 : 3 : 0

|              | f1-score | precision | recall   | support |
|--------------|----------|-----------|----------|---------|
| AFIB         | 0.654935 | 0.648944  | 0.661068 | 875.0   |
| GSVT         | 0.663327 | 0.669180  | 0.657675 | 691.0   |
| SB           | 0.705095 | 0.701378  | 0.708863 | 1553.0  |
| SR           | 0.689156 | 0.697461  | 0.681109 | 907.0   |
| macro avg    | 0.678129 | 0.679241  | 0.677179 | 4026.0  |
| micro avg    | 0.683437 | 0.683437  | 0.683437 | 4026.0  |
| weighted avg | 0.683434 | 0.683573  | 0.683437 | 4026.0  |

The result of Model Number:Dataset Number:Featuregroup Number:Rescale of 43 : 0 : 3 : 1

|      | f1-score | precision | recall   | support |
|------|----------|-----------|----------|---------|
| AFIB | 0.755117 | 0.759261  | 0.751066 | 875.0   |



GSVT 0.756173 0.746613 0.766100 691.0  
SB 0.795247 0.792056 0.798471 1553.0  
SR 0.778175 0.787622 0.769001 907.0  
macro avg 0.771178 0.771388 0.771159 4026.0  
micro avg 0.775973 0.775973 0.775973 4026.0  
weighted avg 0.775973 0.776130 0.775973 4026.0  
The result of Model Number:Dataset Number:Featuregroup Number:Rescale of 43 : 0 : 4 :  
0

f1-score precision recall support  
AFIB 0.857215 0.858946 0.855510 204.0  
GSVT 0.881064 0.878444 0.883704 300.0  
SB 0.895663 0.894865 0.896465 892.0  
SR 0.887964 0.889670 0.886277 681.0  
macro avg 0.880477 0.880481 0.880489 2077.0  
micro avg 0.887259 0.887259 0.887259 2077.0  
weighted avg 0.887254 0.887262 0.887259 2077.0  
The result of Model Number:Dataset Number:Featuregroup Number:Rescale of 43 : 0 : 4 :  
1

f1-score precision recall support  
AFIB 0.675431 0.680721 0.670259 875.0  
GSVT 0.677212 0.668569 0.686124 691.0  
SB 0.710319 0.707471 0.713199 1553.0  
SR 0.695312 0.702137 0.688644 907.0  
macro avg 0.689569 0.689725 0.689556 4026.0  
micro avg 0.693687 0.693687 0.693687 4026.0  
weighted avg 0.693674 0.693779 0.693687 4026.0  
The result of Model Number:Dataset Number:Featuregroup Number:Rescale of 43 : 0 : 5 :  
0

f1-score precision recall support  
AFIB 0.861557 0.860769 0.862451 875.0  
GSVT 0.879217 0.877511 0.881021 691.0  
SB 0.932964 0.930886 0.935065 1553.0  
SR 0.907499 0.913420 0.901688 907.0  
macro avg 0.895309 0.895646 0.895056 4026.0  
micro avg 0.902488 0.902488 0.902488 4026.0  
weighted avg 0.902483 0.902551 0.902488 4026.0  
The result of Model Number:Dataset Number:Featuregroup Number:Rescale of 43 : 0 : 5 :  
1

f1-score precision recall support  
AFIB 0.739589 0.797233 0.690062 204.0  
GSVT 0.762143 0.775044 0.749696 300.0  
SB 0.807728 0.800294 0.815326 892.0  
SR 0.775579 0.764333 0.787198 681.0  
macro avg 0.771260 0.784226 0.760571 2077.0

micro avg 0.784321 0.784321 0.784321 2077.0  
weighted avg 0.783910 0.784555 0.784321 2077.0  
The result of Model Number:Dataset Number:Featuregroup Number:Rescale of 43 : 0 : 6 :  
0

|              | f1-score | precision | recall   | support |
|--------------|----------|-----------|----------|---------|
| AFIB         | 0.832557 | 0.821849  | 0.843606 | 875.0   |
| GSVT         | 0.849504 | 0.856537  | 0.842621 | 691.0   |
| SB           | 0.908291 | 0.904248  | 0.912381 | 1553.0  |
| SR           | 0.882443 | 0.895495  | 0.869788 | 907.0   |
| macro avg    | 0.868199 | 0.869532  | 0.867099 | 4026.0  |
| micro avg    | 0.875865 | 0.875865  | 0.875865 | 4026.0  |
| weighted avg | 0.875918 | 0.876179  | 0.875865 | 4026.0  |

The result of Model Number:Dataset Number:Featuregroup Number:Rescale of 43 : 0 : 6 :  
1

|              | f1-score | precision | recall   | support |
|--------------|----------|-----------|----------|---------|
| AFIB         | 0.751535 | 0.757492  | 0.745690 | 875.0   |
| GSVT         | 0.761063 | 0.757708  | 0.764474 | 691.0   |
| SB           | 0.809301 | 0.806101  | 0.812531 | 1553.0  |
| SR           | 0.789413 | 0.791644  | 0.787234 | 907.0   |
| macro avg    | 0.777828 | 0.778236  | 0.777482 | 4026.0  |
| micro avg    | 0.784057 | 0.784057  | 0.784057 | 4026.0  |
| weighted avg | 0.783987 | 0.783974  | 0.784057 | 4026.0  |

The result of Model Number:Dataset Number:Featuregroup Number:Rescale of 43 : 0 : 7 :  
0

|              | f1-score | precision | recall   | support |
|--------------|----------|-----------|----------|---------|
| AFIB         | 0.687215 | 0.688405  | 0.686039 | 875.0   |
| GSVT         | 0.695547 | 0.687555  | 0.703785 | 691.0   |
| SB           | 0.732435 | 0.723604  | 0.741488 | 1553.0  |
| SR           | 0.697620 | 0.718758  | 0.677706 | 907.0   |
| macro avg    | 0.703205 | 0.704581  | 0.702255 | 4026.0  |
| micro avg    | 0.708597 | 0.708597  | 0.708597 | 4026.0  |
| weighted avg | 0.708433 | 0.708675  | 0.708597 | 4026.0  |

The result of Model Number:Dataset Number:Featuregroup Number:Rescale of 43 : 0 : 7 :  
1

|              | f1-score | precision | recall   | support |
|--------------|----------|-----------|----------|---------|
| AFIB         | 0.841443 | 0.848929  | 0.834132 | 875.0   |
| GSVT         | 0.859104 | 0.849677  | 0.868799 | 691.0   |
| SB           | 0.923962 | 0.916768  | 0.931277 | 1553.0  |
| SR           | 0.893257 | 0.905919  | 0.880949 | 907.0   |
| macro avg    | 0.879442 | 0.880323  | 0.878789 | 4026.0  |
| micro avg    | 0.888102 | 0.888102  | 0.888102 | 4026.0  |
| weighted avg | 0.887978 | 0.888065  | 0.888102 | 4026.0  |

The result of Model Number:Dataset Number:Featuregroup Number:Rescale of 43 : 0 : 8 :  
0

f1-score precision recall support  
AFIB 0.673701 0.672949 0.674475 875.0  
GSVT 0.686024 0.677444 0.694845 691.0  
SB 0.720665 0.714871 0.726559 1553.0  
SR 0.688512 0.706577 0.671359 907.0  
macro avg 0.692226 0.692960 0.691809 4026.0  
micro avg 0.697360 0.697360 0.697360 4026.0  
weighted avg 0.697269 0.697467 0.697360 4026.0  
The result of Model Number:Dataset Number:Featuregroup Number:Rescale of 43 : 0 : 8 :  
1

f1-score precision recall support  
AFIB 0.863861 0.845304 0.883299 875.0  
GSVT 0.894619 0.907593 0.882070 691.0  
SB 0.952357 0.952176 0.952542 1553.0  
SR 0.928488 0.939280 0.917947 907.0  
macro avg 0.909832 0.911088 0.908965 4026.0  
micro avg 0.917604 0.917604 0.917604 4026.0  
weighted avg 0.917837 0.918391 0.917604 4026.0  
The result of Model Number:Dataset Number:Featuregroup Number:Rescale of 43 : 0 : 9 :  
0

f1-score precision recall support  
AFIB 0.698453 0.778992 0.633099 204.0  
GSVT 0.823548 0.809213 0.838574 300.0  
SB 0.879294 0.875397 0.883236 892.0  
SR 0.858889 0.847145 0.870989 681.0  
macro avg 0.815046 0.827687 0.806475 2077.0  
micro avg 0.848201 0.848201 0.848201 2077.0  
weighted avg 0.846790 0.847106 0.848201 2077.0  
The result of Model Number:Dataset Number:Featuregroup Number:Rescale of 43 : 0 : 9 :  
1

f1-score precision recall support  
AFIB 0.782419 0.761865 0.831401 875.0  
GSVT 0.752680 0.712421 0.858040 691.0  
SB 0.713203 0.708696 0.717789 1553.0  
SR 0.692764 0.704700 0.681419 907.0  
macro avg 0.735267 0.721921 0.772162 4026.0  
micro avg 0.758359 0.758359 0.758359 4026.0  
weighted avg 0.730417 0.719991 0.758359 4026.0  
The result of Model Number:Dataset Number:Featuregroup Number:Rescale of 43 : 0 :  
10 : 0

f1-score precision recall support  
AFIB 0.726265 0.786893 0.675758 204.0  
GSVT 0.779003 0.769207 0.789368 300.0  
SB 0.798890 0.787698 0.810498 892.0

SR 0.777097 0.780738 0.773870 681.0  
macro avg 0.770314 0.781134 0.762373 2077.0  
micro avg 0.782202 0.782202 0.782202 2077.0  
weighted avg 0.781739 0.782666 0.782202 2077.0  
The result of Model Number:Dataset Number:Featuregroup Number:Rescale of 43 : 0 :  
10 : 1

f1-score precision recall support  
AFIB 0.833841 0.854636 0.814096 875.0  
GSVT 0.887061 0.890461 0.883727 691.0  
SB 0.960612 0.955961 0.965312 1553.0  
SR 0.910233 0.895061 0.925987 907.0  
macro avg 0.897937 0.899030 0.897280 4026.0  
micro avg 0.909585 0.909585 0.909585 4026.0  
weighted avg 0.909086 0.908978 0.909585 4026.0

The result of Model Number:Dataset Number:Featuregroup Number:Rescale of 43 : 1 : 0 :  
0

f1-score precision recall support  
AFIB 0.661856 0.697859 0.629554 204.0  
GSVT 0.694826 0.684317 0.705691 300.0  
SB 0.711338 0.706710 0.716037 892.0  
SR 0.702561 0.703195 0.701946 681.0  
macro avg 0.692645 0.698020 0.688307 2077.0  
micro avg 0.701428 0.701428 0.701428 2077.0  
weighted avg 0.701215 0.701454 0.701428 2077.0

The result of Model Number:Dataset Number:Featuregroup Number:Rescale of 43 : 1 : 0 :  
1

f1-score precision recall support  
AFIB 0.631952 0.637638 0.626565 875.0  
GSVT 0.644825 0.631750 0.658605 691.0  
SB 0.683841 0.676234 0.691704 1553.0  
SR 0.656705 0.676226 0.638435 907.0  
macro avg 0.654331 0.655462 0.653827 4026.0  
micro avg 0.659865 0.659865 0.659865 4026.0  
weighted avg 0.659754 0.660209 0.659865 4026.0

The result of Model Number:Dataset Number:Featuregroup Number:Rescale of 43 : 1 : 1 :  
0

f1-score precision recall support  
AFIB 0.657267 0.655873 0.658698 875.0  
GSVT 0.667536 0.664336 0.670823 691.0  
SB 0.702579 0.694192 0.711173 1553.0  
SR 0.669929 0.688908 0.651981 907.0  
macro avg 0.674328 0.675827 0.673169 4026.0  
micro avg 0.679508 0.679508 0.679508 4026.0  
weighted avg 0.679361 0.679549 0.679508 4026.0

The result of Model Number:Dataset Number:Featuregroup Number:Rescale of 43 : 1 : 1 : 1

|              | f1-score | precision | recall   | support |
|--------------|----------|-----------|----------|---------|
| AFIB         | 0.769641 | 0.754309  | 0.785649 | 875.0   |
| GSVT         | 0.626420 | 0.582537  | 0.785199 | 691.0   |
| SB           | 0.508270 | 0.509146  | 0.507398 | 1553.0  |
| SR           | 0.823971 | 0.831227  | 0.816876 | 907.0   |
| macro avg    | 0.682076 | 0.669305  | 0.723780 | 4026.0  |
| micro avg    | 0.685273 | 0.685273  | 0.685273 | 4026.0  |
| weighted avg | 0.656477 | 0.647586  | 0.685273 | 4026.0  |

The result of Model Number:Dataset Number:Featuregroup Number:Rescale of 43 : 1 : 2 : 0

|              | f1-score | precision | recall   | support |
|--------------|----------|-----------|----------|---------|
| AFIB         | 0.578834 | 0.639378  | 0.528934 | 204.0   |
| GSVT         | 0.680958 | 0.671967  | 0.690266 | 300.0   |
| SB           | 0.722153 | 0.719347  | 0.724986 | 892.0   |
| SR           | 0.704801 | 0.694756  | 0.715148 | 681.0   |
| macro avg    | 0.671687 | 0.681362  | 0.664833 | 2077.0  |
| micro avg    | 0.697489 | 0.697489  | 0.697489 | 2077.0  |
| weighted avg | 0.696437 | 0.696586  | 0.697489 | 2077.0  |

The result of Model Number:Dataset Number:Featuregroup Number:Rescale of 43 : 1 : 2 : 1

|              | f1-score | precision | recall   | support |
|--------------|----------|-----------|----------|---------|
| AFIB         | 0.902359 | 0.920460  | 0.885135 | 204.0   |
| GSVT         | 0.923271 | 0.913674  | 0.933121 | 300.0   |
| SB           | 0.940347 | 0.936689  | 0.944036 | 892.0   |
| SR           | 0.930466 | 0.934348  | 0.926637 | 681.0   |
| macro avg    | 0.924111 | 0.926293  | 0.922232 | 2077.0  |
| micro avg    | 0.930970 | 0.930970  | 0.930970 | 2077.0  |
| weighted avg | 0.930909 | 0.931003  | 0.930970 | 2077.0  |

The result of Model Number:Dataset Number:Featuregroup Number:Rescale of 43 : 1 : 3 : 0

|              | f1-score | precision | recall   | support |
|--------------|----------|-----------|----------|---------|
| AFIB         | 0.715451 | 0.732300  | 0.699422 | 875.0   |
| GSVT         | 0.754192 | 0.756096  | 0.752346 | 691.0   |
| SB           | 0.820197 | 0.816797  | 0.823629 | 1553.0  |
| SR           | 0.780423 | 0.768132  | 0.793150 | 907.0   |
| macro avg    | 0.767566 | 0.768331  | 0.767137 | 4026.0  |
| micro avg    | 0.777533 | 0.777533  | 0.777533 | 4026.0  |
| weighted avg | 0.777142 | 0.777051  | 0.777533 | 4026.0  |

The result of Model Number:Dataset Number:Featuregroup Number:Rescale of 43 : 1 : 3 : 1

|      | f1-score | precision | recall   | support |
|------|----------|-----------|----------|---------|
| AFIB | 0.677034 | 0.680488  | 0.673637 | 875.0   |

GSVT 0.686378 0.682807 0.690046 691.0  
SB 0.719431 0.718788 0.720080 1553.0  
SR 0.706184 0.706760 0.705638 907.0  
macro avg 0.697257 0.697211 0.697350 4026.0  
micro avg 0.701578 0.701578 0.701578 4026.0  
weighted avg 0.701559 0.701579 0.701578 4026.0  
The result of Model Number:Dataset Number:Featuregroup Number:Rescale of 43 : 1 : 4 :  
0

f1-score precision recall support  
AFIB 0.922957 0.937108 0.909378 204.0  
GSVT 0.944841 0.936825 0.953035 300.0  
SB 0.961277 0.958175 0.964402 892.0  
SR 0.951399 0.954931 0.947905 681.0  
macro avg 0.945118 0.946760 0.943680 2077.0  
micro avg 0.951947 0.951947 0.951947 2077.0  
weighted avg 0.951900 0.951958 0.951947 2077.0  
The result of Model Number:Dataset Number:Featuregroup Number:Rescale of 43 : 1 : 4 :  
1

f1-score precision recall support  
AFIB 0.862383 0.869345 0.855605 204.0  
GSVT 0.882171 0.877845 0.886570 300.0  
SB 0.899388 0.898390 0.900396 892.0  
SR 0.892672 0.893859 0.891494 681.0  
macro avg 0.884153 0.884860 0.883516 2077.0  
micro avg 0.891081 0.891081 0.891081 2077.0  
weighted avg 0.891065 0.891084 0.891081 2077.0  
The result of Model Number:Dataset Number:Featuregroup Number:Rescale of 43 : 1 : 5 :  
0

f1-score precision recall support  
AFIB 0.683332 0.682514 0.684267 875.0  
GSVT 0.696652 0.699049 0.694344 691.0  
SB 0.737859 0.733313 0.742466 1553.0  
SR 0.722843 0.729903 0.715999 907.0  
macro avg 0.710171 0.711195 0.709269 4026.0  
micro avg 0.715595 0.715595 0.715595 4026.0  
weighted avg 0.715553 0.715623 0.715595 4026.0  
The result of Model Number:Dataset Number:Featuregroup Number:Rescale of 43 : 1 : 5 :  
1

f1-score precision recall support  
AFIB 0.858275 0.878820 0.839925 204.0  
GSVT 0.883549 0.871100 0.896728 300.0  
SB 0.906506 0.897296 0.915948 892.0  
SR 0.884840 0.897616 0.872492 681.0  
macro avg 0.883292 0.886208 0.881273 2077.0

micro avg 0.891457 0.891457 0.891457 2077.0  
weighted avg 0.891349 0.891803 0.891457 2077.0  
The result of Model Number:Dataset Number:Featuregroup Number:Rescale of 43 : 1 : 6 :  
0

|              | f1-score | precision | recall   | support |
|--------------|----------|-----------|----------|---------|
| AFIB         | 0.780737 | 0.809561  | 0.753968 | 204.0   |
| GSVT         | 0.797425 | 0.789241  | 0.805904 | 300.0   |
| SB           | 0.819266 | 0.815445  | 0.823123 | 892.0   |
| SR           | 0.806491 | 0.806997  | 0.806013 | 681.0   |
| macro avg    | 0.800980 | 0.805311  | 0.797252 | 2077.0  |
| micro avg    | 0.808234 | 0.808234  | 0.808234 | 2077.0  |
| weighted avg | 0.808138 | 0.808312  | 0.808234 | 2077.0  |

The result of Model Number:Dataset Number:Featuregroup Number:Rescale of 43 : 1 : 6 :  
1

|              | f1-score | precision | recall   | support |
|--------------|----------|-----------|----------|---------|
| AFIB         | 0.700014 | 0.697748  | 0.702317 | 875.0   |
| GSVT         | 0.708131 | 0.710331  | 0.706015 | 691.0   |
| SB           | 0.747193 | 0.745567  | 0.748829 | 1553.0  |
| SR           | 0.733414 | 0.736874  | 0.730014 | 907.0   |
| macro avg    | 0.722188 | 0.722630  | 0.721794 | 4026.0  |
| micro avg    | 0.727133 | 0.727133  | 0.727133 | 4026.0  |
| weighted avg | 0.727131 | 0.727168  | 0.727133 | 4026.0  |

The result of Model Number:Dataset Number:Featuregroup Number:Rescale of 43 : 1 : 7 :  
0

|              | f1-score | precision | recall   | support |
|--------------|----------|-----------|----------|---------|
| AFIB         | 0.784940 | 0.787241  | 0.782713 | 875.0   |
| GSVT         | 0.797928 | 0.787680  | 0.808550 | 691.0   |
| SB           | 0.844474 | 0.842422  | 0.846541 | 1553.0  |
| SR           | 0.823091 | 0.832859  | 0.813558 | 907.0   |
| macro avg    | 0.812608 | 0.812550  | 0.812840 | 4026.0  |
| micro avg    | 0.818717 | 0.818717  | 0.818717 | 4026.0  |
| weighted avg | 0.818729 | 0.818879  | 0.818717 | 4026.0  |

The result of Model Number:Dataset Number:Featuregroup Number:Rescale of 43 : 1 : 7 :  
1

|              | f1-score | precision | recall   | support |
|--------------|----------|-----------|----------|---------|
| AFIB         | 0.735337 | 0.738021  | 0.732722 | 875.0   |
| GSVT         | 0.748047 | 0.738306  | 0.758112 | 691.0   |
| SB           | 0.788517 | 0.779832  | 0.797402 | 1553.0  |
| SR           | 0.747288 | 0.767931  | 0.727766 | 907.0   |
| macro avg    | 0.754797 | 0.756023  | 0.754001 | 4026.0  |
| micro avg    | 0.760913 | 0.760913  | 0.760913 | 4026.0  |
| weighted avg | 0.760725 | 0.760937  | 0.760913 | 4026.0  |

The result of Model Number:Dataset Number:Featuregroup Number:Rescale of 43 : 1 : 8 :  
0

f1-score precision recall support  
AFIB 0.650268 0.670369 0.631905 204.0  
GSVT 0.607017 0.620214 0.594819 300.0  
SB 0.640250 0.611834 0.671465 892.0  
SR 0.576475 0.606097 0.549694 681.0  
macro avg 0.618503 0.627129 0.611971 2077.0  
micro avg 0.616583 0.616583 0.616583 2077.0  
weighted avg 0.615523 0.616913 0.616583 2077.0  
The result of Model Number:Dataset Number:Featuregroup Number:Rescale of 43 : 1 : 8 :  
1

f1-score precision recall support  
AFIB 0.563948 0.620845 0.516934 204.0  
GSVT 0.665059 0.655879 0.674605 300.0  
SB 0.706164 0.703808 0.708538 892.0  
SR 0.688079 0.678560 0.697879 681.0  
macro avg 0.655812 0.664773 0.649489 2077.0  
micro avg 0.681323 0.681323 0.681323 2077.0  
weighted avg 0.680329 0.680458 0.681323 2077.0  
The result of Model Number:Dataset Number:Featuregroup Number:Rescale of 43 : 1 : 9 :  
0

f1-score precision recall support  
AFIB 0.616030 0.627535 0.682039 204.0  
GSVT 0.739787 0.724801 0.755781 300.0  
SB 0.608584 0.602898 0.614385 892.0  
SR 0.740731 0.746919 0.734748 681.0  
macro avg 0.676283 0.675538 0.696738 2077.0  
micro avg 0.680917 0.680917 0.680917 2077.0  
weighted avg 0.671594 0.670147 0.680917 2077.0  
The result of Model Number:Dataset Number:Featuregroup Number:Rescale of 43 : 1 : 9 :  
1

f1-score precision recall support  
AFIB 0.672905 0.672154 0.673679 875.0  
GSVT 0.685214 0.676644 0.694024 691.0  
SB 0.719813 0.714026 0.725700 1553.0  
SR 0.687699 0.705742 0.670566 907.0  
macro avg 0.691408 0.692141 0.690992 4026.0  
micro avg 0.696536 0.696536 0.696536 4026.0  
weighted avg 0.696445 0.696643 0.696536 4026.0  
The result of Model Number:Dataset Number:Featuregroup Number:Rescale of 43 : 1 :  
10 : 0

f1-score precision recall support  
AFIB 0.808131 0.800738 0.815698 875.0  
GSVT 0.818486 0.825708 0.811512 691.0  
SB 0.870024 0.865438 0.874672 1553.0



SR 0.850357 0.860604 0.840427 907.0  
macro avg 0.836749 0.838122 0.835577 4026.0  
micro avg 0.843300 0.843300 0.843300 4026.0  
weighted avg 0.843296 0.843468 0.843300 4026.0  
The result of Model Number:Dataset Number:Featuregroup Number:Rescale of 43 : 1 :  
10 : 1

f1-score precision recall support  
AFIB 0.793433 0.804162 0.783318 204.0  
GSVT 0.823570 0.822233 0.824940 300.0  
SB 0.841455 0.840334 0.842586 892.0  
SR 0.832854 0.831787 0.833953 681.0  
macro avg 0.822828 0.824629 0.821199 2077.0  
micro avg 0.831386 0.831386 0.831386 2077.0  
weighted avg 0.831335 0.831364 0.831386 2077.0

The result of Model Number:Dataset Number:Featuregroup Number:Rescale of 44 : 0 : 0 :  
0

f1-score precision recall support  
AFIB 0.889017 0.889810 0.888316 875.0  
GSVT 0.905301 0.907676 0.903091 691.0  
SB 0.960989 0.954591 0.967484 1553.0  
SR 0.942265 0.950868 0.933851 907.0  
macro avg 0.924393 0.925736 0.923185 4026.0  
micro avg 0.931649 0.931649 0.931649 4026.0  
weighted avg 0.931571 0.931621 0.931649 4026.0

The result of Model Number:Dataset Number:Featuregroup Number:Rescale of 44 : 0 : 0 :  
1

f1-score precision recall support  
AFIB 0.814202 0.858492 0.774465 204.0  
GSVT 0.854761 0.841834 0.868127 300.0  
SB 0.875074 0.869381 0.880854 892.0  
SR 0.864277 0.865056 0.863520 681.0  
macro avg 0.852078 0.858691 0.846742 2077.0  
micro avg 0.862883 0.862883 0.862883 2077.0  
weighted avg 0.862621 0.862915 0.862883 2077.0

The result of Model Number:Dataset Number:Featuregroup Number:Rescale of 44 : 0 : 1 :  
0

f1-score precision recall support  
AFIB 0.831758 0.835544 0.828058 875.0  
GSVT 0.835800 0.827469 0.844372 691.0  
SB 0.880935 0.871336 0.890748 1553.0  
SR 0.842519 0.862465 0.823478 907.0  
macro avg 0.847753 0.849203 0.846664 4026.0  
micro avg 0.854009 0.854009 0.854009 4026.0  
weighted avg 0.853846 0.854029 0.854009 4026.0

The result of Model Number:Dataset Number:Featuregroup Number:Rescale of 44 : 0 : 1 : 1

|              | f1-score | precision | recall   | support |
|--------------|----------|-----------|----------|---------|
| AFIB         | 0.710725 | 0.726409  | 0.695755 | 204.0   |
| GSVT         | 0.726257 | 0.714214  | 0.738801 | 300.0   |
| SB           | 0.740212 | 0.734423  | 0.746102 | 892.0   |
| SR           | 0.722248 | 0.730941  | 0.713761 | 681.0   |
| macro avg    | 0.724861 | 0.726497  | 0.723605 | 2077.0  |
| micro avg    | 0.729499 | 0.729499  | 0.729499 | 2077.0  |
| weighted avg | 0.729410 | 0.729575  | 0.729499 | 2077.0  |

The result of Model Number:Dataset Number:Featuregroup Number:Rescale of 44 : 0 : 2 : 0

|              | f1-score | precision | recall   | support |
|--------------|----------|-----------|----------|---------|
| AFIB         | 0.709549 | 0.755781  | 0.668962 | 204.0   |
| GSVT         | 0.740634 | 0.722429  | 0.759880 | 300.0   |
| SB           | 0.762355 | 0.752561  | 0.772433 | 892.0   |
| SR           | 0.742553 | 0.751420  | 0.733943 | 681.0   |
| macro avg    | 0.738773 | 0.745548  | 0.733805 | 2077.0  |
| micro avg    | 0.747837 | 0.747837  | 0.747837 | 2077.0  |
| weighted avg | 0.747538 | 0.748151  | 0.747837 | 2077.0  |

The result of Model Number:Dataset Number:Featuregroup Number:Rescale of 44 : 0 : 2 : 1

|              | f1-score | precision | recall   | support |
|--------------|----------|-----------|----------|---------|
| AFIB         | 0.897617 | 0.911226  | 0.884431 | 204.0   |
| GSVT         | 0.912051 | 0.904362  | 0.919919 | 300.0   |
| SB           | 0.932281 | 0.929274  | 0.935311 | 892.0   |
| SR           | 0.922274 | 0.925699  | 0.918898 | 681.0   |
| macro avg    | 0.916056 | 0.917640  | 0.914640 | 2077.0  |
| micro avg    | 0.922709 | 0.922709  | 0.922709 | 2077.0  |
| weighted avg | 0.922673 | 0.922731  | 0.922709 | 2077.0  |

The result of Model Number:Dataset Number:Featuregroup Number:Rescale of 44 : 0 : 3 : 0

|              | f1-score | precision | recall   | support |
|--------------|----------|-----------|----------|---------|
| AFIB         | 0.779469 | 0.763728  | 0.795936 | 875.0   |
| GSVT         | 0.805312 | 0.818117  | 0.793076 | 691.0   |
| SB           | 0.856864 | 0.856816  | 0.856919 | 1553.0  |
| SR           | 0.836089 | 0.843708  | 0.828621 | 907.0   |
| macro avg    | 0.819434 | 0.820592  | 0.818638 | 4026.0  |
| micro avg    | 0.826332 | 0.826332  | 0.826332 | 4026.0  |
| weighted avg | 0.826515 | 0.826989  | 0.826332 | 4026.0  |

The result of Model Number:Dataset Number:Featuregroup Number:Rescale of 44 : 0 : 3 : 1

|      | f1-score | precision | recall   | support |
|------|----------|-----------|----------|---------|
| AFIB | 0.735495 | 0.720641  | 0.751032 | 875.0   |

GSVT 0.759880 0.771961 0.748334 691.0  
SB 0.808523 0.808478 0.808575 1553.0  
SR 0.788920 0.796109 0.781873 907.0  
macro avg 0.773204 0.774297 0.772453 4026.0  
micro avg 0.779714 0.779714 0.779714 4026.0  
weighted avg 0.779886 0.780334 0.779714 4026.0  
The result of Model Number:Dataset Number:Featuregroup Number:Rescale of 44 : 0 : 4 :  
0

f1-score precision recall support

AFIB 0.747081 0.756974 0.737556 204.0  
GSVT 0.769626 0.766848 0.772441 300.0  
SB 0.779212 0.776787 0.781656 892.0  
SR 0.770722 0.772206 0.769264 681.0  
macro avg 0.766660 0.768204 0.765229 2077.0  
micro avg 0.771930 0.771930 0.771930 2077.0  
weighted avg 0.771888 0.771904 0.771930 2077.0

The result of Model Number:Dataset Number:Featuregroup Number:Rescale of 44 : 0 : 4 :  
1

f1-score precision recall support

AFIB 0.677738 0.674982 0.680534 875.0  
GSVT 0.687645 0.691802 0.683564 691.0  
SB 0.725251 0.724368 0.726138 1553.0  
SR 0.710121 0.711246 0.709020 907.0  
macro avg 0.700189 0.700599 0.699814 4026.0  
micro avg 0.705063 0.705063 0.705063 4026.0  
weighted avg 0.705061 0.705089 0.705063 4026.0

The result of Model Number:Dataset Number:Featuregroup Number:Rescale of 44 : 0 : 5 :  
0

f1-score precision recall support

AFIB 0.815700 0.827247 0.805141 204.0  
GSVT 0.832636 0.817305 0.848705 300.0  
SB 0.850382 0.840980 0.860011 892.0  
SR 0.832511 0.849467 0.816268 681.0  
macro avg 0.832807 0.833750 0.832531 2077.0  
micro avg 0.838646 0.838646 0.838646 2077.0  
weighted avg 0.838553 0.838994 0.838646 2077.0

The result of Model Number:Dataset Number:Featuregroup Number:Rescale of 44 : 0 : 5 :  
1

f1-score precision recall support

AFIB 0.727307 0.734391 0.720535 204.0  
GSVT 0.744126 0.740709 0.747599 300.0  
SB 0.754409 0.751813 0.757028 892.0  
SR 0.748038 0.750940 0.745193 681.0  
macro avg 0.743470 0.744463 0.742589 2077.0

micro avg 0.748201 0.748201 0.748201 2077.0  
weighted avg 0.748173 0.748212 0.748201 2077.0  
The result of Model Number:Dataset Number:Featuregroup Number:Rescale of 44 : 0 : 6 :  
0

|              | f1-score | precision | recall   | support |
|--------------|----------|-----------|----------|---------|
| AFIB         | 0.868205 | 0.891670  | 0.846122 | 204.0   |
| GSVT         | 0.875361 | 0.862475  | 0.888757 | 300.0   |
| SB           | 0.892317 | 0.882824  | 0.902019 | 892.0   |
| SR           | 0.875767 | 0.887800  | 0.864069 | 681.0   |
| macro avg    | 0.877912 | 0.881192  | 0.875242 | 2077.0  |
| micro avg    | 0.882170 | 0.882170  | 0.882170 | 2077.0  |
| weighted avg | 0.882073 | 0.882385  | 0.882170 | 2077.0  |

The result of Model Number:Dataset Number:Featuregroup Number:Rescale of 44 : 0 : 6 :  
1

|              | f1-score | precision | recall   | support |
|--------------|----------|-----------|----------|---------|
| AFIB         | 0.795331 | 0.794615  | 0.796125 | 875.0   |
| GSVT         | 0.809109 | 0.801701  | 0.816719 | 691.0   |
| SB           | 0.849064 | 0.841599  | 0.856663 | 1553.0  |
| SR           | 0.809091 | 0.829093  | 0.790102 | 907.0   |
| macro avg    | 0.815649 | 0.816752  | 0.814902 | 4026.0  |
| micro avg    | 0.821655 | 0.821655  | 0.821655 | 4026.0  |
| weighted avg | 0.821523 | 0.821722  | 0.821655 | 4026.0  |

The result of Model Number:Dataset Number:Featuregroup Number:Rescale of 44 : 0 : 7 :  
0

|              | f1-score | precision | recall   | support |
|--------------|----------|-----------|----------|---------|
| AFIB         | 0.779218 | 0.779357  | 0.779113 | 875.0   |
| GSVT         | 0.787462 | 0.790122  | 0.784869 | 691.0   |
| SB           | 0.827188 | 0.824336  | 0.830064 | 1553.0  |
| SR           | 0.811481 | 0.814218  | 0.808792 | 907.0   |
| macro avg    | 0.801337 | 0.802008  | 0.800710 | 4026.0  |
| micro avg    | 0.806441 | 0.806441  | 0.806441 | 4026.0  |
| weighted avg | 0.806405 | 0.806409  | 0.806441 | 4026.0  |

The result of Model Number:Dataset Number:Featuregroup Number:Rescale of 44 : 0 : 7 :  
1

|              | f1-score | precision | recall   | support |
|--------------|----------|-----------|----------|---------|
| AFIB         | 0.639793 | 0.710039  | 0.582348 | 204.0   |
| GSVT         | 0.747044 | 0.737705  | 0.756770 | 300.0   |
| SB           | 0.794819 | 0.790763  | 0.798917 | 892.0   |
| SR           | 0.776199 | 0.765347  | 0.787366 | 681.0   |
| macro avg    | 0.739464 | 0.750963  | 0.731350 | 2077.0  |
| micro avg    | 0.767771 | 0.767771  | 0.767771 | 2077.0  |
| weighted avg | 0.766587 | 0.766837  | 0.767771 | 2077.0  |

The result of Model Number:Dataset Number:Featuregroup Number:Rescale of 44 : 0 : 8 :  
0

f1-score precision recall support  
AFIB 0.813947 0.813897 0.814046 875.0  
GSVT 0.815708 0.811298 0.820180 691.0  
SB 0.854678 0.848991 0.860452 1553.0  
SR 0.831983 0.845633 0.818797 907.0  
macro avg 0.829079 0.829955 0.828369 4026.0  
micro avg 0.834070 0.834070 0.834070 4026.0  
weighted avg 0.834024 0.834138 0.834070 4026.0  
The result of Model Number:Dataset Number:Featuregroup Number:Rescale of 44 : 0 : 8 :  
1

f1-score precision recall support  
AFIB 0.711816 0.738296 0.687488 204.0  
GSVT 0.660538 0.691190 0.632551 300.0  
SB 0.691940 0.650205 0.739412 892.0  
SR 0.607657 0.649876 0.570659 681.0  
macro avg 0.667988 0.682392 0.657527 2077.0  
micro avg 0.663547 0.663547 0.663547 2077.0  
weighted avg 0.661722 0.664669 0.663547 2077.0  
The result of Model Number:Dataset Number:Featuregroup Number:Rescale of 44 : 0 : 9 :  
0

f1-score precision recall support  
AFIB 0.644192 0.629178 0.660044 875.0  
GSVT 0.618401 0.625199 0.611791 691.0  
SB 0.650768 0.608746 0.699038 1553.0  
SR 0.520838 0.625426 0.446497 907.0  
macro avg 0.608550 0.622137 0.604342 4026.0  
micro avg 0.618695 0.618695 0.618695 4026.0  
weighted avg 0.614512 0.619768 0.618695 4026.0  
The result of Model Number:Dataset Number:Featuregroup Number:Rescale of 44 : 0 : 9 :  
1

f1-score precision recall support  
AFIB 0.754875 0.841920 0.684242 204.0  
GSVT 0.890075 0.874582 0.906315 300.0  
SB 0.950325 0.946113 0.954585 892.0  
SR 0.928271 0.915579 0.941349 681.0  
macro avg 0.880887 0.894549 0.871623 2077.0  
micro avg 0.916720 0.916720 0.916720 2077.0  
weighted avg 0.915195 0.915536 0.916720 2077.0  
The result of Model Number:Dataset Number:Featuregroup Number:Rescale of 44 : 0 :  
10 : 0

f1-score precision recall support  
AFIB 0.856231 0.914694 0.805158 204.0  
GSVT 0.905122 0.886677 0.924429 300.0  
SB 0.927572 0.919440 0.935883 892.0

SR 0.904692 0.907704 0.901779 681.0  
macro avg 0.898404 0.907129 0.891812 2077.0  
micro avg 0.910207 0.910207 0.910207 2077.0  
weighted avg 0.909820 0.910394 0.910207 2077.0  
The result of Model Number:Dataset Number:Featuregroup Number:Rescale of 44 : 0 :  
10 : 1

f1-score precision recall support  
AFIB 0.647698 0.628339 0.690614 875.0  
GSVT 0.554657 0.542511 0.567565 691.0  
SB 0.735687 0.729693 0.741976 1553.0  
SR 0.690180 0.719157 0.664743 907.0  
macro avg 0.657056 0.654925 0.666225 4026.0  
micro avg 0.683479 0.683479 0.683479 4026.0  
weighted avg 0.675241 0.673165 0.683479 4026.0

The result of Model Number:Dataset Number:Featuregroup Number:Rescale of 44 : 1 : 0 :  
0

f1-score precision recall support  
AFIB 0.773871 0.786438 0.761741 875.0  
GSVT 0.823035 0.825614 0.820521 691.0  
SB 0.895420 0.892335 0.898532 1553.0  
SR 0.847702 0.838260 0.857410 907.0  
macro avg 0.835007 0.835662 0.834551 4026.0  
micro avg 0.846149 0.846149 0.846149 4026.0  
weighted avg 0.845829 0.845686 0.846149 4026.0

The result of Model Number:Dataset Number:Featuregroup Number:Rescale of 44 : 1 : 0 :  
1

f1-score precision recall support  
AFIB 0.844775 0.844724 0.844879 875.0  
GSVT 0.846603 0.842026 0.851245 691.0  
SB 0.887049 0.881146 0.893042 1553.0  
SR 0.863494 0.877662 0.849809 907.0  
macro avg 0.860480 0.861389 0.859744 4026.0  
micro avg 0.865661 0.865661 0.865661 4026.0  
weighted avg 0.865613 0.865731 0.865661 4026.0

The result of Model Number:Dataset Number:Featuregroup Number:Rescale of 44 : 1 : 1 :  
0

f1-score precision recall support  
AFIB 0.670674 0.656266 0.685764 875.0  
GSVT 0.694553 0.704626 0.684810 691.0  
SB 0.739379 0.739239 0.739523 1553.0  
SR 0.720848 0.729226 0.712664 907.0  
macro avg 0.706364 0.707339 0.705690 4026.0  
micro avg 0.712398 0.712398 0.712398 4026.0  
weighted avg 0.712578 0.713009 0.712398 4026.0

The result of Model Number:Dataset Number:Featuregroup Number:Rescale of 44 : 1 : 1 : 1

|              | f1-score | precision | recall   | support |
|--------------|----------|-----------|----------|---------|
| AFIB         | 0.662579 | 0.657511  | 0.667813 | 875.0   |
| GSVT         | 0.677824 | 0.681531  | 0.674197 | 691.0   |
| SB           | 0.717761 | 0.717258  | 0.718270 | 1553.0  |
| SR           | 0.698696 | 0.702085  | 0.695376 | 907.0   |
| macro avg    | 0.689215 | 0.689596  | 0.688914 | 4026.0  |
| micro avg    | 0.694582 | 0.694582  | 0.694582 | 4026.0  |
| weighted avg | 0.694618 | 0.694723  | 0.694582 | 4026.0  |

The result of Model Number:Dataset Number:Featuregroup Number:Rescale of 44 : 1 : 2 : 0

|              | f1-score | precision | recall   | support |
|--------------|----------|-----------|----------|---------|
| AFIB         | 0.865011 | 0.884590  | 0.846391 | 204.0   |
| GSVT         | 0.888030 | 0.883682  | 0.892460 | 300.0   |
| SB           | 0.906197 | 0.903580  | 0.908836 | 892.0   |
| SR           | 0.900375 | 0.899986  | 0.900778 | 681.0   |
| macro avg    | 0.889903 | 0.892960  | 0.887116 | 2077.0  |
| micro avg    | 0.897695 | 0.897695  | 0.897695 | 2077.0  |
| weighted avg | 0.897619 | 0.897663  | 0.897695 | 2077.0  |

The result of Model Number:Dataset Number:Featuregroup Number:Rescale of 44 : 1 : 2 : 1

|              | f1-score | precision | recall   | support |
|--------------|----------|-----------|----------|---------|
| AFIB         | 0.769179 | 0.739774  | 0.817563 | 875.0   |
| GSVT         | 0.797000 | 0.769494  | 0.834309 | 691.0   |
| SB           | 0.888006 | 0.872332  | 0.905230 | 1553.0  |
| SR           | 0.752121 | 0.904382  | 0.649355 | 907.0   |
| macro avg    | 0.801577 | 0.821495  | 0.801614 | 4026.0  |
| micro avg    | 0.816359 | 0.816359  | 0.816359 | 4026.0  |
| weighted avg | 0.815948 | 0.833092  | 0.816359 | 4026.0  |

The result of Model Number:Dataset Number:Featuregroup Number:Rescale of 44 : 1 : 3 : 0

|              | f1-score | precision | recall   | support |
|--------------|----------|-----------|----------|---------|
| AFIB         | 0.836905 | 0.828700  | 0.894819 | 204.0   |
| GSVT         | 0.750414 | 0.742071  | 0.759135 | 300.0   |
| SB           | 0.964329 | 0.957306  | 0.971461 | 892.0   |
| SR           | 0.948156 | 0.954723  | 0.941756 | 681.0   |
| macro avg    | 0.874951 | 0.870700  | 0.891793 | 2077.0  |
| micro avg    | 0.923526 | 0.923526  | 0.923526 | 2077.0  |
| weighted avg | 0.915613 | 0.912739  | 0.923526 | 2077.0  |

The result of Model Number:Dataset Number:Featuregroup Number:Rescale of 44 : 1 : 3 : 1

|      | f1-score | precision | recall   | support |
|------|----------|-----------|----------|---------|
| AFIB | 0.837689 | 0.841678  | 0.833775 | 875.0   |

GSVT 0.848038 0.832626 0.864117 691.0  
SB 0.897288 0.893852 0.900753 1553.0  
SR 0.870766 0.885671 0.856369 907.0  
macro avg 0.863445 0.863457 0.863754 4026.0  
micro avg 0.869909 0.869909 0.869909 4026.0  
weighted avg 0.869907 0.870161 0.869909 4026.0  
The result of Model Number:Dataset Number:Featuregroup Number:Rescale of 44 : 1 : 4 :  
0

f1-score precision recall support  
AFIB 0.560119 0.570580 0.620137 204.0  
GSVT 0.672644 0.659018 0.687186 300.0  
SB 0.553349 0.548179 0.558623 892.0  
SR 0.673502 0.679129 0.668062 681.0  
macro avg 0.614904 0.614226 0.633502 2077.0  
micro avg 0.619117 0.619117 0.619117 2077.0  
weighted avg 0.610640 0.609324 0.619117 2077.0  
The result of Model Number:Dataset Number:Featuregroup Number:Rescale of 44 : 1 : 4 :  
1

f1-score precision recall support  
AFIB 0.668678 0.667596 0.669823 875.0  
GSVT 0.674805 0.677488 0.672177 691.0  
SB 0.708663 0.706087 0.711263 1553.0  
SR 0.697071 0.700598 0.693619 907.0  
macro avg 0.687304 0.687942 0.686720 4026.0  
micro avg 0.691573 0.691573 0.691573 4026.0  
weighted avg 0.691550 0.691576 0.691573 4026.0  
The result of Model Number:Dataset Number:Featuregroup Number:Rescale of 44 : 1 : 5 :  
0

f1-score precision recall support  
AFIB 0.847513 0.855741 0.839967 204.0  
GSVT 0.872918 0.868791 0.877314 300.0  
SB 0.890594 0.889601 0.891592 892.0  
SR 0.882758 0.883673 0.881851 681.0  
macro avg 0.873446 0.874451 0.872681 2077.0  
micro avg 0.881265 0.881265 0.881265 2077.0  
weighted avg 0.881240 0.881326 0.881265 2077.0  
The result of Model Number:Dataset Number:Featuregroup Number:Rescale of 44 : 1 : 5 :  
1

f1-score precision recall support  
AFIB 0.823289 0.823436 0.823178 875.0  
GSVT 0.831999 0.834810 0.829260 691.0  
SB 0.873972 0.870959 0.877011 1553.0  
SR 0.857376 0.860268 0.854535 907.0  
macro avg 0.846659 0.847368 0.845996 4026.0



micro avg 0.852052 0.852052 0.852052 4026.0  
weighted avg 0.852014 0.852017 0.852052 4026.0  
The result of Model Number:Dataset Number:Featuregroup Number:Rescale of 44 : 1 : 6 :  
0

|              | f1-score | precision | recall   | support |
|--------------|----------|-----------|----------|---------|
| AFIB         | 0.793090 | 0.762770  | 0.842978 | 875.0   |
| GSVT         | 0.821775 | 0.793414  | 0.860244 | 691.0   |
| SB           | 0.915610 | 0.899449  | 0.933369 | 1553.0  |
| SR           | 0.775501 | 0.932495  | 0.669541 | 907.0   |
| macro avg    | 0.826494 | 0.847032  | 0.826533 | 4026.0  |
| micro avg    | 0.841736 | 0.841736  | 0.841736 | 4026.0  |
| weighted avg | 0.841312 | 0.858989  | 0.841736 | 4026.0  |

The result of Model Number:Dataset Number:Featuregroup Number:Rescale of 44 : 1 : 6 :  
1

|              | f1-score | precision | recall   | support |
|--------------|----------|-----------|----------|---------|
| AFIB         | 0.877986 | 0.884946  | 0.871158 | 875.0   |
| GSVT         | 0.889117 | 0.885197  | 0.893102 | 691.0   |
| SB           | 0.945472 | 0.941734  | 0.949246 | 1553.0  |
| SR           | 0.922238 | 0.924844  | 0.919691 | 907.0   |
| macro avg    | 0.908703 | 0.909180  | 0.908299 | 4026.0  |
| micro avg    | 0.915980 | 0.915980  | 0.915980 | 4026.0  |
| weighted avg | 0.915898 | 0.915883  | 0.915980 | 4026.0  |

The result of Model Number:Dataset Number:Featuregroup Number:Rescale of 44 : 1 : 7 :  
0

|              | f1-score | precision | recall   | support |
|--------------|----------|-----------|----------|---------|
| AFIB         | 0.687613 | 0.678980  | 0.696668 | 875.0   |
| GSVT         | 0.637969 | 0.657285  | 0.621889 | 691.0   |
| SB           | 0.686875 | 0.636198  | 0.748141 | 1553.0  |
| SR           | 0.534067 | 0.653658  | 0.455410 | 907.0   |
| macro avg    | 0.636631 | 0.656530  | 0.630527 | 4026.0  |
| micro avg    | 0.649337 | 0.649337  | 0.649337 | 4026.0  |
| weighted avg | 0.644216 | 0.653049  | 0.649337 | 4026.0  |

The result of Model Number:Dataset Number:Featuregroup Number:Rescale of 44 : 1 : 7 :  
1

|              | f1-score | precision | recall   | support |
|--------------|----------|-----------|----------|---------|
| AFIB         | 0.738905 | 0.750903  | 0.727323 | 875.0   |
| GSVT         | 0.785847 | 0.788309  | 0.783447 | 691.0   |
| SB           | 0.854962 | 0.852015  | 0.857933 | 1553.0  |
| SR           | 0.809399 | 0.800384  | 0.818669 | 907.0   |
| macro avg    | 0.797278 | 0.797903  | 0.796843 | 4026.0  |
| micro avg    | 0.807916 | 0.807916  | 0.807916 | 4026.0  |
| weighted avg | 0.807611 | 0.807474  | 0.807916 | 4026.0  |

The result of Model Number:Dataset Number:Featuregroup Number:Rescale of 44 : 1 : 8 :  
0

f1-score precision recall support  
AFIB 0.645759 0.645168 0.646429 875.0  
GSVT 0.658996 0.657717 0.660348 691.0  
SB 0.699280 0.697723 0.700856 1553.0  
SR 0.680194 0.684631 0.675838 907.0  
macro avg 0.671057 0.671310 0.670868 4026.0  
micro avg 0.676438 0.676438 0.676438 4026.0  
weighted avg 0.676434 0.676485 0.676438 4026.0  
The result of Model Number:Dataset Number:Featuregroup Number:Rescale of 44 : 1 : 8 :  
1

f1-score precision recall support  
AFIB 0.759875 0.778826 0.741882 875.0  
GSVT 0.808374 0.811473 0.805337 691.0  
SB 0.875401 0.871163 0.879684 1553.0  
SR 0.829491 0.815665 0.843848 907.0  
macro avg 0.818286 0.819282 0.817688 4026.0  
micro avg 0.828901 0.828901 0.828901 4026.0  
weighted avg 0.828446 0.828347 0.828901 4026.0  
The result of Model Number:Dataset Number:Featuregroup Number:Rescale of 44 : 1 : 9 :  
0

f1-score precision recall support  
AFIB 0.696058 0.721952 0.672269 204.0  
GSVT 0.645915 0.675889 0.618547 300.0  
SB 0.676622 0.635811 0.723043 892.0  
SR 0.594205 0.635490 0.558026 681.0  
macro avg 0.653200 0.667285 0.642971 2077.0  
micro avg 0.648858 0.648858 0.648858 2077.0  
weighted avg 0.647073 0.649955 0.648858 2077.0  
The result of Model Number:Dataset Number:Featuregroup Number:Rescale of 44 : 1 : 9 :  
1

f1-score precision recall support  
AFIB 0.723583 0.714582 0.732895 875.0  
GSVT 0.746237 0.755582 0.737195 691.0  
SB 0.796131 0.795268 0.797001 1553.0  
SR 0.774658 0.778630 0.770730 907.0  
macro avg 0.760152 0.761015 0.759455 4026.0  
micro avg 0.766885 0.766885 0.766885 4026.0  
weighted avg 0.766962 0.767172 0.766885 4026.0  
The result of Model Number:Dataset Number:Featuregroup Number:Rescale of 44 : 1 :  
10 : 0

f1-score precision recall support  
AFIB 0.773197 0.762842 0.783886 875.0  
GSVT 0.790484 0.796654 0.784423 691.0  
SB 0.839274 0.836648 0.841921 1553.0

SR 0.818978 0.829835 0.808416 907.0  
macro avg 0.805483 0.806495 0.804661 4026.0  
micro avg 0.811891 0.811891 0.811891 4026.0  
weighted avg 0.811967 0.812208 0.811891 4026.0  
The result of Model Number:Dataset Number:Featuregroup Number:Rescale of 44 : 1 : 10 : 1

f1-score precision recall support  
AFIB 0.796117 0.812848 0.780092 875.0  
GSVT 0.847772 0.850684 0.844921 691.0  
SB 0.923659 0.919306 0.928058 1553.0  
SR 0.874347 0.862703 0.886383 907.0  
macro avg 0.860474 0.861385 0.859863 4026.0  
micro avg 0.872241 0.872241 0.872241 4026.0  
weighted avg 0.871805 0.871639 0.872241 4026.0

The result of Model Number:Dataset Number:Featuregroup Number:Rescale of 45 : 0 : 0 : 0

f1-score precision recall support  
AFIB 0.609440 0.595106 0.641607 875.0  
GSVT 0.585616 0.580217 0.598961 691.0  
SB 0.635141 0.590419 0.687924 1553.0  
SR 0.396018 0.496671 0.329796 907.0  
macro avg 0.556554 0.565603 0.564572 4026.0  
micro avg 0.581907 0.581907 0.581907 4026.0  
weighted avg 0.567184 0.568567 0.581907 4026.0

The result of Model Number:Dataset Number:Featuregroup Number:Rescale of 45 : 0 : 0 : 1

f1-score precision recall support  
AFIB 0.642314 0.633417 0.651490 875.0  
GSVT 0.656560 0.661873 0.651334 691.0  
SB 0.696930 0.694928 0.698949 1553.0  
SR 0.679976 0.688826 0.671357 907.0  
macro avg 0.668945 0.669761 0.668283 4026.0  
micro avg 0.674246 0.674246 0.674246 4026.0  
weighted avg 0.674312 0.674511 0.674246 4026.0

The result of Model Number:Dataset Number:Featuregroup Number:Rescale of 45 : 0 : 1 : 0

f1-score precision recall support  
AFIB 0.841564 0.836530 0.846773 875.0  
GSVT 0.848456 0.853037 0.844047 691.0  
SB 0.899236 0.896607 0.901894 1553.0  
SR 0.878917 0.885230 0.872710 907.0  
macro avg 0.867043 0.867851 0.866356 4026.0  
micro avg 0.873411 0.873411 0.873411 4026.0  
weighted avg 0.873409 0.873509 0.873411 4026.0

The result of Model Number:Dataset Number:Featuregroup Number:Rescale of 45 : 0 : 1 :  
1

|              | f1-score | precision | recall   | support |
|--------------|----------|-----------|----------|---------|
| AFIB         | 0.912665 | 0.932501  | 0.893905 | 204.0   |
| GSVT         | 0.950339 | 0.944733  | 0.956038 | 300.0   |
| SB           | 0.970756 | 0.968603  | 0.972930 | 892.0   |
| SR           | 0.961024 | 0.960482  | 0.961591 | 681.0   |
| macro avg    | 0.948696 | 0.951580  | 0.946116 | 2077.0  |
| micro avg    | 0.959011 | 0.959011  | 0.959011 | 2077.0  |
| weighted avg | 0.958911 | 0.958947  | 0.959011 | 2077.0  |

The result of Model Number:Dataset Number:Featuregroup Number:Rescale of 45 : 0 : 2 :  
0

|              | f1-score | precision | recall   | support |
|--------------|----------|-----------|----------|---------|
| AFIB         | 0.759652 | 0.767027  | 0.752889 | 204.0   |
| GSVT         | 0.782423 | 0.778725  | 0.786364 | 300.0   |
| SB           | 0.798268 | 0.797377  | 0.799162 | 892.0   |
| SR           | 0.791244 | 0.792063  | 0.790430 | 681.0   |
| macro avg    | 0.782897 | 0.783798  | 0.782211 | 2077.0  |
| micro avg    | 0.789906 | 0.789906  | 0.789906 | 2077.0  |
| weighted avg | 0.789884 | 0.789960  | 0.789906 | 2077.0  |

The result of Model Number:Dataset Number:Featuregroup Number:Rescale of 45 : 0 : 2 :  
1

|              | f1-score | precision | recall   | support |
|--------------|----------|-----------|----------|---------|
| AFIB         | 0.809444 | 0.810538  | 0.808506 | 875.0   |
| GSVT         | 0.822051 | 0.821628  | 0.822504 | 691.0   |
| SB           | 0.858547 | 0.855475  | 0.861644 | 1553.0  |
| SR           | 0.837987 | 0.842685  | 0.833396 | 907.0   |
| macro avg    | 0.832007 | 0.832582  | 0.831513 | 4026.0  |
| micro avg    | 0.837014 | 0.837014  | 0.837014 | 4026.0  |
| weighted avg | 0.836979 | 0.837018  | 0.837014 | 4026.0  |

The result of Model Number:Dataset Number:Featuregroup Number:Rescale of 45 : 0 : 3 :  
0

|              | f1-score | precision | recall   | support |
|--------------|----------|-----------|----------|---------|
| AFIB         | 0.668669 | 0.705319  | 0.636084 | 204.0   |
| GSVT         | 0.636715 | 0.659038  | 0.615933 | 300.0   |
| SB           | 0.654924 | 0.629664  | 0.682306 | 892.0   |
| SR           | 0.582900 | 0.598714  | 0.567933 | 681.0   |
| macro avg    | 0.635802 | 0.648184  | 0.625564 | 2077.0  |
| micro avg    | 0.630679 | 0.630679  | 0.630679 | 2077.0  |
| weighted avg | 0.630029 | 0.631190  | 0.630679 | 2077.0  |

The result of Model Number:Dataset Number:Featuregroup Number:Rescale of 45 : 0 : 3 :  
1

|      | f1-score | precision | recall   | support |
|------|----------|-----------|----------|---------|
| AFIB | 0.689164 | 0.708162  | 0.671297 | 204.0   |

GSVT 0.707505 0.694408 0.721173 300.0  
SB 0.718979 0.712258 0.725831 892.0  
SR 0.700907 0.710430 0.691649 681.0  
macro avg 0.704139 0.706314 0.702487 2077.0  
micro avg 0.708594 0.708594 0.708594 2077.0  
weighted avg 0.708468 0.708678 0.708594 2077.0  
The result of Model Number:Dataset Number:Featuregroup Number:Rescale of 45 : 0 : 4 :  
0

f1-score precision recall support

AFIB 0.683044 0.684268 0.681847 875.0  
GSVT 0.654061 0.657496 0.650679 691.0  
SB 0.691837 0.653780 0.734606 1553.0  
SR 0.574574 0.646725 0.516957 907.0  
macro avg 0.650879 0.660567 0.646022 4026.0  
micro avg 0.659701 0.659701 0.659701 4026.0  
weighted avg 0.657025 0.659455 0.659701 4026.0

The result of Model Number:Dataset Number:Featuregroup Number:Rescale of 45 : 0 : 4 :  
1

f1-score precision recall support

AFIB 0.664606 0.690432 0.640691 875.0  
GSVT 0.714473 0.709197 0.719923 691.0  
SB 0.785151 0.781106 0.789244 1553.0  
SR 0.738899 0.724809 0.753627 907.0  
macro avg 0.725782 0.726386 0.725871 4026.0  
micro avg 0.737036 0.737036 0.737036 4026.0  
weighted avg 0.736401 0.736374 0.737036 4026.0

The result of Model Number:Dataset Number:Featuregroup Number:Rescale of 45 : 0 : 5 :  
0

f1-score precision recall support

AFIB 0.738925 0.780961 0.701674 204.0  
GSVT 0.780878 0.772279 0.789710 300.0  
SB 0.792493 0.784608 0.800566 892.0  
SR 0.783287 0.785965 0.780751 681.0  
macro avg 0.773896 0.780953 0.768175 2077.0  
micro avg 0.782788 0.782788 0.782788 2077.0  
weighted avg 0.782536 0.782914 0.782788 2077.0

The result of Model Number:Dataset Number:Featuregroup Number:Rescale of 45 : 0 : 5 :  
1

f1-score precision recall support

AFIB 0.678848 0.672192 0.725824 204.0  
GSVT 0.608692 0.601924 0.615765 300.0  
SB 0.782207 0.776510 0.787992 892.0  
SR 0.769088 0.774415 0.763897 681.0  
macro avg 0.709709 0.706260 0.723370 2077.0

micro avg 0.749109 0.749109 0.749109 2077.0  
weighted avg 0.742691 0.740360 0.749109 2077.0  
The result of Model Number:Dataset Number:Featuregroup Number:Rescale of 45 : 0 : 6 :  
0

|              | f1-score | precision | recall   | support |
|--------------|----------|-----------|----------|---------|
| AFIB         | 0.792030 | 0.825527  | 0.761408 | 204.0   |
| GSVT         | 0.729402 | 0.730679  | 0.739071 | 300.0   |
| SB           | 0.785268 | 0.747859  | 0.827379 | 892.0   |
| SR           | 0.694216 | 0.750130  | 0.647315 | 681.0   |
| macro avg    | 0.750229 | 0.763549  | 0.743793 | 2077.0  |
| micro avg    | 0.749106 | 0.749106  | 0.749106 | 2077.0  |
| weighted avg | 0.748009 | 0.753750  | 0.749106 | 2077.0  |

The result of Model Number:Dataset Number:Featuregroup Number:Rescale of 45 : 0 : 6 :  
1

|              | f1-score | precision | recall   | support |
|--------------|----------|-----------|----------|---------|
| AFIB         | 0.748687 | 0.780351  | 0.719740 | 204.0   |
| GSVT         | 0.689486 | 0.690693  | 0.698626 | 300.0   |
| SB           | 0.742295 | 0.706933  | 0.782102 | 892.0   |
| SR           | 0.656226 | 0.709080  | 0.611891 | 681.0   |
| macro avg    | 0.709173 | 0.721764  | 0.703090 | 2077.0  |
| micro avg    | 0.708112 | 0.708112  | 0.708112 | 2077.0  |
| weighted avg | 0.707075 | 0.712502  | 0.708112 | 2077.0  |

The result of Model Number:Dataset Number:Featuregroup Number:Rescale of 45 : 0 : 7 :  
0

|              | f1-score | precision | recall   | support |
|--------------|----------|-----------|----------|---------|
| AFIB         | 0.925743 | 0.928164  | 0.923516 | 204.0   |
| GSVT         | 0.946630 | 0.942965  | 0.950402 | 300.0   |
| SB           | 0.967860 | 0.966568  | 0.969160 | 892.0   |
| SR           | 0.960108 | 0.962806  | 0.957430 | 681.0   |
| macro avg    | 0.950085 | 0.950126  | 0.950127 | 2077.0  |
| micro avg    | 0.958122 | 0.958122  | 0.958122 | 2077.0  |
| weighted avg | 0.958115 | 0.958154  | 0.958122 | 2077.0  |

The result of Model Number:Dataset Number:Featuregroup Number:Rescale of 45 : 0 : 7 :  
1

|              | f1-score | precision | recall   | support |
|--------------|----------|-----------|----------|---------|
| AFIB         | 0.785464 | 0.802962  | 0.768939 | 204.0   |
| GSVT         | 0.795155 | 0.783509  | 0.807483 | 300.0   |
| SB           | 0.813123 | 0.805042  | 0.821403 | 892.0   |
| SR           | 0.798124 | 0.809588  | 0.787005 | 681.0   |
| macro avg    | 0.797966 | 0.800275  | 0.796208 | 2077.0  |
| micro avg    | 0.802961 | 0.802961  | 0.802961 | 2077.0  |
| weighted avg | 0.802893 | 0.803218  | 0.802961 | 2077.0  |

The result of Model Number:Dataset Number:Featuregroup Number:Rescale of 45 : 0 : 8 :  
0

f1-score precision recall support  
AFIB 0.663450 0.666469 0.660499 875.0  
GSVT 0.666674 0.660029 0.673511 691.0  
SB 0.702675 0.695018 0.710503 1553.0  
SR 0.672033 0.687943 0.656845 907.0  
macro avg 0.676208 0.677365 0.675339 4026.0  
micro avg 0.681198 0.681198 0.681198 4026.0  
weighted avg 0.681068 0.681214 0.681198 4026.0  
The result of Model Number:Dataset Number:Featuregroup Number:Rescale of 45 : 0 : 8 :  
1

f1-score precision recall support  
AFIB 0.662082 0.664559 0.659906 875.0  
GSVT 0.676986 0.683517 0.670714 691.0  
SB 0.719847 0.712297 0.727615 1553.0  
SR 0.694920 0.701036 0.689149 907.0  
macro avg 0.688459 0.690352 0.686846 4026.0  
micro avg 0.694467 0.694467 0.694467 4026.0  
weighted avg 0.694321 0.694445 0.694467 4026.0  
The result of Model Number:Dataset Number:Featuregroup Number:Rescale of 45 : 0 : 9 :  
0

f1-score precision recall support  
AFIB 0.722881 0.724892 0.720919 875.0  
GSVT 0.739440 0.739235 0.739652 691.0  
SB 0.787527 0.780125 0.795079 1553.0  
SR 0.766660 0.777715 0.755923 907.0  
macro avg 0.754127 0.755492 0.752893 4026.0  
micro avg 0.760627 0.760627 0.760627 4026.0  
weighted avg 0.760522 0.760560 0.760627 4026.0  
The result of Model Number:Dataset Number:Featuregroup Number:Rescale of 45 : 0 : 9 :  
1

f1-score precision recall support  
AFIB 0.680936 0.681701 0.680295 204.0  
GSVT 0.696569 0.695014 0.698184 300.0  
SB 0.711333 0.710384 0.712289 892.0  
SR 0.706006 0.707784 0.704245 681.0  
macro avg 0.698711 0.698721 0.698753 2077.0  
micro avg 0.704472 0.704472 0.704472 2077.0  
weighted avg 0.704468 0.704494 0.704472 2077.0  
The result of Model Number:Dataset Number:Featuregroup Number:Rescale of 45 : 0 :  
10 : 0

f1-score precision recall support  
AFIB 0.689028 0.703339 0.675447 875.0  
GSVT 0.671940 0.648602 0.726789 691.0  
SB 0.791986 0.788415 0.795603 1553.0

SR 0.602105 0.592384 0.612205 907.0  
macro avg 0.688765 0.683185 0.702511 4026.0  
micro avg 0.716361 0.716361 0.716361 4026.0  
weighted avg 0.706228 0.701765 0.716361 4026.0  
The result of Model Number:Dataset Number:Featuregroup Number:Rescale of 45 : 0 :  
10 : 1

f1-score precision recall support  
AFIB 0.717099 0.728744 0.705859 875.0  
GSVT 0.762656 0.765046 0.760327 691.0  
SB 0.829731 0.826872 0.832614 1553.0  
SR 0.785513 0.776764 0.794509 907.0  
macro avg 0.773750 0.774356 0.773327 4026.0  
micro avg 0.784074 0.784074 0.784074 4026.0  
weighted avg 0.783778 0.783645 0.784074 4026.0  
The result of Model Number:Dataset Number:Featuregroup Number:Rescale of 45 : 1 : 0 :  
0

f1-score precision recall support  
AFIB 0.816334 0.805912 0.827077 875.0  
GSVT 0.830662 0.835426 0.825975 691.0  
SB 0.889173 0.885438 0.892947 1553.0  
SR 0.862992 0.876960 0.849476 907.0  
macro avg 0.849790 0.850934 0.848869 4026.0  
micro avg 0.857343 0.857343 0.857343 4026.0  
weighted avg 0.857402 0.857660 0.857343 4026.0  
The result of Model Number:Dataset Number:Featuregroup Number:Rescale of 45 : 1 : 0 :  
1

f1-score precision recall support  
AFIB 0.669080 0.670431 0.667749 204.0  
GSVT 0.687694 0.685650 0.689755 300.0  
SB 0.699089 0.698466 0.699715 892.0  
SR 0.693080 0.694411 0.691763 681.0  
macro avg 0.687236 0.687239 0.687245 2077.0  
micro avg 0.692530 0.692530 0.692530 2077.0  
weighted avg 0.692526 0.692532 0.692530 2077.0  
The result of Model Number:Dataset Number:Featuregroup Number:Rescale of 45 : 1 : 1 :  
0

f1-score precision recall support  
AFIB 0.673460 0.680638 0.666541 204.0  
GSVT 0.685845 0.682083 0.689725 300.0  
SB 0.701677 0.700507 0.702854 892.0  
SR 0.695827 0.696961 0.694707 681.0  
macro avg 0.689202 0.690047 0.688457 2077.0  
micro avg 0.694720 0.694720 0.694720 2077.0  
weighted avg 0.694701 0.694732 0.694720 2077.0



The result of Model Number:Dataset Number:Featuregroup Number:Rescale of 45 : 1 : 1 :  
1

|              | f1-score | precision | recall   | support |
|--------------|----------|-----------|----------|---------|
| AFIB         | 0.762009 | 0.772796  | 0.752144 | 204.0   |
| GSVT         | 0.777829 | 0.763508  | 0.792841 | 300.0   |
| SB           | 0.794408 | 0.785624  | 0.803403 | 892.0   |
| SR           | 0.777712 | 0.793552  | 0.762539 | 681.0   |
| macro avg    | 0.777989 | 0.778870  | 0.777732 | 2077.0  |
| micro avg    | 0.783444 | 0.783444  | 0.783444 | 2077.0  |
| weighted avg | 0.783357 | 0.783769  | 0.783444 | 2077.0  |

The result of Model Number:Dataset Number:Featuregroup Number:Rescale of 45 : 1 : 2 :  
0

|              | f1-score | precision | recall   | support |
|--------------|----------|-----------|----------|---------|
| AFIB         | 0.826286 | 0.829377  | 0.823569 | 875.0   |
| GSVT         | 0.844885 | 0.853036  | 0.837058 | 691.0   |
| SB           | 0.898377 | 0.888954  | 0.908071 | 1553.0  |
| SR           | 0.867267 | 0.874900  | 0.860065 | 907.0   |
| macro avg    | 0.859204 | 0.861567  | 0.857191 | 4026.0  |
| micro avg    | 0.866702 | 0.866702  | 0.866702 | 4026.0  |
| weighted avg | 0.866519 | 0.866675  | 0.866702 | 4026.0  |

The result of Model Number:Dataset Number:Featuregroup Number:Rescale of 45 : 1 : 2 :  
1

|              | f1-score | precision | recall   | support |
|--------------|----------|-----------|----------|---------|
| AFIB         | 0.784475 | 0.774982  | 0.794239 | 875.0   |
| GSVT         | 0.795094 | 0.803246  | 0.787168 | 691.0   |
| SB           | 0.844470 | 0.841722  | 0.847243 | 1553.0  |
| SR           | 0.826000 | 0.834487  | 0.817712 | 907.0   |
| macro avg    | 0.812510 | 0.813609  | 0.811590 | 4026.0  |
| micro avg    | 0.818759 | 0.818759  | 0.818759 | 4026.0  |
| weighted avg | 0.818795 | 0.818983  | 0.818759 | 4026.0  |

The result of Model Number:Dataset Number:Featuregroup Number:Rescale of 45 : 1 : 3 :  
0

|              | f1-score | precision | recall   | support |
|--------------|----------|-----------|----------|---------|
| AFIB         | 0.822286 | 0.822236  | 0.822387 | 875.0   |
| GSVT         | 0.824065 | 0.819610  | 0.828583 | 691.0   |
| SB           | 0.863434 | 0.857689  | 0.869268 | 1553.0  |
| SR           | 0.840507 | 0.854297  | 0.827186 | 907.0   |
| macro avg    | 0.837573 | 0.838458  | 0.836856 | 4026.0  |
| micro avg    | 0.842616 | 0.842616  | 0.842616 | 4026.0  |
| weighted avg | 0.842569 | 0.842684  | 0.842616 | 4026.0  |

The result of Model Number:Dataset Number:Featuregroup Number:Rescale of 45 : 1 : 3 :  
1

|      | f1-score | precision | recall   | support |
|------|----------|-----------|----------|---------|
| AFIB | 0.887721 | 0.887879  | 0.887601 | 875.0   |

GSVT 0.897113 0.900144 0.894159 691.0  
SB 0.942371 0.939122 0.945647 1553.0  
SR 0.924476 0.927594 0.921413 907.0  
macro avg 0.912920 0.913685 0.912205 4026.0  
micro avg 0.918735 0.918735 0.918735 4026.0  
weighted avg 0.918694 0.918698 0.918735 4026.0  
The result of Model Number:Dataset Number:Featuregroup Number:Rescale of 45 : 1 : 4 :  
0

f1-score precision recall support

AFIB 0.813637 0.819722 0.807674 204.0  
GSVT 0.834427 0.830023 0.838878 300.0  
SB 0.848509 0.847374 0.849649 892.0  
SR 0.841036 0.842648 0.839431 681.0  
macro avg 0.834402 0.834942 0.833908 2077.0  
micro avg 0.840621 0.840621 0.840621 2077.0  
weighted avg 0.840600 0.840602 0.840621 2077.0

The result of Model Number:Dataset Number:Featuregroup Number:Rescale of 45 : 1 : 4 :  
1

f1-score precision recall support

AFIB 0.757610 0.749151 0.766271 875.0  
GSVT 0.772683 0.779761 0.765745 691.0  
SB 0.824102 0.821419 0.826807 1553.0  
SR 0.802738 0.810780 0.794857 907.0  
macro avg 0.789284 0.790278 0.788420 4026.0  
micro avg 0.795972 0.795972 0.795972 4026.0  
weighted avg 0.796013 0.796166 0.795972 4026.0

The result of Model Number:Dataset Number:Featuregroup Number:Rescale of 45 : 1 : 5 :  
0

f1-score precision recall support

AFIB 0.896603 0.912170 0.881672 204.0  
GSVT 0.914271 0.911566 0.917012 300.0  
SB 0.925053 0.921761 0.928371 892.0  
SR 0.917531 0.918490 0.916596 681.0  
macro avg 0.913365 0.915997 0.910913 2077.0  
micro avg 0.918283 0.918283 0.918283 2077.0  
weighted avg 0.918235 0.918274 0.918283 2077.0

The result of Model Number:Dataset Number:Featuregroup Number:Rescale of 45 : 1 : 5 :  
1

f1-score precision recall support

AFIB 0.816215 0.836883 0.796619 204.0  
GSVT 0.833942 0.824873 0.843350 300.0  
SB 0.857430 0.853151 0.861756 892.0  
SR 0.844141 0.847928 0.840421 681.0  
macro avg 0.837932 0.840709 0.835536 2077.0

micro avg 0.845704 0.845704 0.845704 2077.0  
weighted avg 0.845632 0.845756 0.845704 2077.0  
The result of Model Number:Dataset Number:Featuregroup Number:Rescale of 45 : 1 : 6 :  
0

|              | f1-score | precision | recall   | support |
|--------------|----------|-----------|----------|---------|
| AFIB         | 0.801637 | 0.792006  | 0.811534 | 875.0   |
| GSVT         | 0.817055 | 0.823670  | 0.810550 | 691.0   |
| SB           | 0.870917 | 0.867584  | 0.874280 | 1553.0  |
| SR           | 0.850497 | 0.861372  | 0.839904 | 907.0   |
| macro avg    | 0.835026 | 0.836158  | 0.834067 | 4026.0  |
| micro avg    | 0.841960 | 0.841960  | 0.841960 | 4026.0  |
| weighted avg | 0.842015 | 0.842221  | 0.841960 | 4026.0  |

The result of Model Number:Dataset Number:Featuregroup Number:Rescale of 45 : 1 : 6 :  
1

|              | f1-score | precision | recall   | support |
|--------------|----------|-----------|----------|---------|
| AFIB         | 0.930051 | 0.931097  | 0.929176 | 204.0   |
| GSVT         | 0.951404 | 0.949280  | 0.953610 | 300.0   |
| SB           | 0.971570 | 0.970273  | 0.972875 | 892.0   |
| SR           | 0.964293 | 0.966722  | 0.961889 | 681.0   |
| macro avg    | 0.954330 | 0.954343  | 0.954388 | 2077.0  |
| micro avg    | 0.962199 | 0.962199  | 0.962199 | 2077.0  |
| weighted avg | 0.962193 | 0.962229  | 0.962199 | 2077.0  |

The result of Model Number:Dataset Number:Featuregroup Number:Rescale of 45 : 1 : 7 :  
0

|              | f1-score | precision | recall   | support |
|--------------|----------|-----------|----------|---------|
| AFIB         | 0.692427 | 0.665955  | 0.735982 | 875.0   |
| GSVT         | 0.717471 | 0.692709  | 0.751057 | 691.0   |
| SB           | 0.799396 | 0.785285  | 0.814901 | 1553.0  |
| SR           | 0.677070 | 0.814138  | 0.584559 | 907.0   |
| macro avg    | 0.721591 | 0.739522  | 0.721625 | 4026.0  |
| micro avg    | 0.734898 | 0.734898  | 0.734898 | 4026.0  |
| weighted avg | 0.734528 | 0.749961  | 0.734898 | 4026.0  |

The result of Model Number:Dataset Number:Featuregroup Number:Rescale of 45 : 1 : 7 :  
1

|              | f1-score | precision | recall   | support |
|--------------|----------|-----------|----------|---------|
| AFIB         | 0.695710 | 0.713627  | 0.678699 | 204.0   |
| GSVT         | 0.638436 | 0.610016  | 0.720474 | 300.0   |
| SB           | 0.732470 | 0.730756  | 0.734193 | 892.0   |
| SR           | 0.581082 | 0.581191  | 0.580980 | 681.0   |
| macro avg    | 0.661924 | 0.658898  | 0.678587 | 2077.0  |
| micro avg    | 0.676526 | 0.676526  | 0.676526 | 2077.0  |
| weighted avg | 0.665641 | 0.662595  | 0.676526 | 2077.0  |

The result of Model Number:Dataset Number:Featuregroup Number:Rescale of 45 : 1 : 8 :  
0

f1-score precision recall support  
AFIB 0.792728 0.772442 0.814181 875.0  
GSVT 0.749372 0.791845 0.711399 691.0  
SB 0.794597 0.731220 0.870022 1553.0  
SR 0.634749 0.770986 0.539544 907.0  
macro avg 0.742862 0.766623 0.733786 4026.0  
micro avg 0.756209 0.756209 0.756209 4026.0  
weighted avg 0.750417 0.759543 0.756209 4026.0  
The result of Model Number:Dataset Number:Featuregroup Number:Rescale of 45 : 1 : 8 :  
1

f1-score precision recall support  
AFIB 0.769029 0.759374 0.779156 875.0  
GSVT 0.713507 0.735109 0.695523 691.0  
SB 0.768203 0.711526 0.836723 1553.0  
SR 0.597303 0.731053 0.509333 907.0  
macro avg 0.712010 0.734265 0.705184 4026.0  
micro avg 0.726220 0.726220 0.726220 4026.0  
weighted avg 0.720493 0.730372 0.726220 4026.0  
The result of Model Number:Dataset Number:Featuregroup Number:Rescale of 45 : 1 : 9 :  
0

f1-score precision recall support  
AFIB 0.892032 0.900692 0.884090 204.0  
GSVT 0.918771 0.914428 0.923399 300.0  
SB 0.937377 0.936331 0.938427 892.0  
SR 0.929129 0.930091 0.928174 681.0  
macro avg 0.919327 0.920386 0.918522 2077.0  
micro avg 0.927558 0.927558 0.927558 2077.0  
weighted avg 0.927531 0.927621 0.927558 2077.0  
The result of Model Number:Dataset Number:Featuregroup Number:Rescale of 45 : 1 : 9 :  
1

f1-score precision recall support  
AFIB 0.738470 0.757488 0.720414 204.0  
GSVT 0.677676 0.647510 0.764756 300.0  
SB 0.777490 0.775671 0.779319 892.0  
SR 0.616797 0.616913 0.616689 681.0  
macro avg 0.702608 0.699395 0.720295 2077.0  
micro avg 0.718107 0.718107 0.718107 2077.0  
weighted avg 0.706553 0.703320 0.718107 2077.0  
The result of Model Number:Dataset Number:Featuregroup Number:Rescale of 45 : 1 :  
10 : 0

f1-score precision recall support  
AFIB 0.849890 0.859334 0.841087 204.0  
GSVT 0.876216 0.871228 0.881516 300.0  
SB 0.893647 0.892449 0.894849 892.0

SR 0.886045 0.887232 0.884873 681.0  
macro avg 0.876449 0.877561 0.875581 2077.0  
micro avg 0.884372 0.884372 0.884372 2077.0  
weighted avg 0.884339 0.884421 0.884372 2077.0  
The result of Model Number:Dataset Number:Featuregroup Number:Rescale of 45 : 1 :  
10 : 1

f1-score precision recall support  
AFIB 0.693913 0.715363 0.674318 204.0  
GSVT 0.647759 0.661841 0.634742 300.0  
SB 0.683222 0.652900 0.716533 892.0  
SR 0.615167 0.646778 0.586589 681.0  
macro avg 0.660015 0.669220 0.653045 2077.0  
micro avg 0.657967 0.657967 0.657967 2077.0  
weighted avg 0.656836 0.658319 0.657967 2077.0

The result of Model Number:Dataset Number:Featuregroup Number:Rescale of 46 : 0 : 0 :  
0

f1-score precision recall support  
AFIB 0.686555 0.701849 0.672110 204.0  
GSVT 0.695025 0.684846 0.705801 300.0  
SB 0.710731 0.703667 0.717968 892.0  
SR 0.697620 0.707640 0.687901 681.0  
macro avg 0.697483 0.699500 0.695945 2077.0  
micro avg 0.701848 0.701848 0.701848 2077.0  
weighted avg 0.701789 0.702073 0.701848 2077.0

The result of Model Number:Dataset Number:Featuregroup Number:Rescale of 46 : 0 : 0 :  
1

f1-score precision recall support  
AFIB 0.716497 0.705788 0.727562 875.0  
GSVT 0.730234 0.736479 0.724106 691.0  
SB 0.780238 0.777552 0.782949 1553.0  
SR 0.757401 0.768698 0.746458 907.0  
macro avg 0.746093 0.747129 0.745269 4026.0  
micro avg 0.752591 0.752591 0.752591 4026.0  
weighted avg 0.752658 0.752911 0.752591 4026.0

The result of Model Number:Dataset Number:Featuregroup Number:Rescale of 46 : 0 : 1 :  
0

f1-score precision recall support  
AFIB 0.881637 0.870073 0.893554 875.0  
GSVT 0.895135 0.905085 0.885417 691.0  
SB 0.949406 0.947165 0.951663 1553.0  
SR 0.925636 0.933967 0.917465 907.0  
macro avg 0.912954 0.914072 0.912025 4026.0  
micro avg 0.919960 0.919960 0.919960 4026.0  
weighted avg 0.920008 0.920214 0.919960 4026.0

The result of Model Number:Dataset Number:Featuregroup Number:Rescale of 46 : 0 : 1 : 1

|              | f1-score | precision | recall   | support |
|--------------|----------|-----------|----------|---------|
| AFIB         | 0.729896 | 0.820703  | 0.657825 | 204.0   |
| GSVT         | 0.865968 | 0.847476  | 0.885323 | 300.0   |
| SB           | 0.924437 | 0.919724  | 0.929202 | 892.0   |
| SR           | 0.903698 | 0.892254  | 0.915497 | 681.0   |
| macro avg    | 0.856000 | 0.870039  | 0.846962 | 2077.0  |
| micro avg    | 0.891717 | 0.891717  | 0.891717 | 2077.0  |
| weighted avg | 0.890084 | 0.890556  | 0.891717 | 2077.0  |

The result of Model Number:Dataset Number:Featuregroup Number:Rescale of 46 : 0 : 2 : 0

|              | f1-score | precision | recall   | support |
|--------------|----------|-----------|----------|---------|
| AFIB         | 0.796621 | 0.812602  | 0.781415 | 204.0   |
| GSVT         | 0.815083 | 0.806611  | 0.823779 | 300.0   |
| SB           | 0.830158 | 0.826929  | 0.833415 | 892.0   |
| SR           | 0.821435 | 0.824862  | 0.818055 | 681.0   |
| macro avg    | 0.815824 | 0.817751  | 0.814166 | 2077.0  |
| micro avg    | 0.821880 | 0.821880  | 0.821880 | 2077.0  |
| weighted avg | 0.821826 | 0.821909  | 0.821880 | 2077.0  |

The result of Model Number:Dataset Number:Featuregroup Number:Rescale of 46 : 0 : 2 : 1

|              | f1-score | precision | recall   | support |
|--------------|----------|-----------|----------|---------|
| AFIB         | 0.771557 | 0.776602  | 0.766624 | 204.0   |
| GSVT         | 0.790888 | 0.789066  | 0.792727 | 300.0   |
| SB           | 0.805005 | 0.803844  | 0.806176 | 892.0   |
| SR           | 0.798661 | 0.799495  | 0.797842 | 681.0   |
| macro avg    | 0.791528 | 0.792252  | 0.790843 | 2077.0  |
| micro avg    | 0.797617 | 0.797617  | 0.797617 | 2077.0  |
| weighted avg | 0.797601 | 0.797608  | 0.797617 | 2077.0  |

The result of Model Number:Dataset Number:Featuregroup Number:Rescale of 46 : 0 : 3 : 0

|              | f1-score | precision | recall   | support |
|--------------|----------|-----------|----------|---------|
| AFIB         | 0.706107 | 0.701215  | 0.711210 | 875.0   |
| GSVT         | 0.717001 | 0.719910  | 0.714230 | 691.0   |
| SB           | 0.777947 | 0.769858  | 0.786212 | 1553.0  |
| SR           | 0.738668 | 0.755856  | 0.722312 | 907.0   |
| macro avg    | 0.734931 | 0.736710  | 0.733491 | 4026.0  |
| micro avg    | 0.743161 | 0.743161  | 0.743161 | 4026.0  |
| weighted avg | 0.743024 | 0.743212  | 0.743161 | 4026.0  |

The result of Model Number:Dataset Number:Featuregroup Number:Rescale of 46 : 0 : 3 : 1

|      | f1-score | precision | recall   | support |
|------|----------|-----------|----------|---------|
| AFIB | 0.782095 | 0.789091  | 0.775319 | 875.0   |

GSVT 0.797032 0.781876 0.812939 691.0  
SB 0.845983 0.838654 0.853444 1553.0  
SR 0.811236 0.829889 0.793440 907.0  
macro avg 0.809086 0.809877 0.808785 4026.0  
micro avg 0.815994 0.815994 0.815994 4026.0  
weighted avg 0.815868 0.816162 0.815994 4026.0  
The result of Model Number:Dataset Number:Featuregroup Number:Rescale of 46 : 0 : 4 :  
0

f1-score precision recall support  
AFIB 0.709378 0.718089 0.700987 204.0  
GSVT 0.723666 0.720576 0.726801 300.0  
SB 0.732426 0.730228 0.734641 892.0  
SR 0.726262 0.727990 0.724565 681.0  
macro avg 0.722933 0.724221 0.721749 2077.0  
micro avg 0.726900 0.726900 0.726900 2077.0  
weighted avg 0.726876 0.726908 0.726900 2077.0  
The result of Model Number:Dataset Number:Featuregroup Number:Rescale of 46 : 0 : 4 :  
1

f1-score precision recall support  
AFIB 0.731467 0.722679 0.740498 875.0  
GSVT 0.745536 0.751572 0.739600 691.0  
SB 0.794683 0.791641 0.797752 1553.0  
SR 0.776050 0.785973 0.766385 907.0  
macro avg 0.761934 0.762966 0.761059 4026.0  
micro avg 0.768261 0.768261 0.768261 4026.0  
weighted avg 0.768311 0.768499 0.768261 4026.0  
The result of Model Number:Dataset Number:Featuregroup Number:Rescale of 46 : 0 : 5 :  
0

f1-score precision recall support  
AFIB 0.857612 0.878141 0.839276 204.0  
GSVT 0.882866 0.870427 0.896035 300.0  
SB 0.905805 0.896603 0.915241 892.0  
SR 0.884156 0.896922 0.871818 681.0  
macro avg 0.882610 0.885523 0.880592 2077.0  
micro avg 0.890768 0.890768 0.890768 2077.0  
weighted avg 0.890660 0.891113 0.890768 2077.0  
The result of Model Number:Dataset Number:Featuregroup Number:Rescale of 46 : 0 : 5 :  
1

f1-score precision recall support  
AFIB 0.778487 0.773396 0.783713 875.0  
GSVT 0.801625 0.808446 0.795025 691.0  
SB 0.853438 0.851579 0.855307 1553.0  
SR 0.832639 0.835982 0.829335 907.0  
macro avg 0.816547 0.817351 0.815845 4026.0

micro avg 0.823549 0.823549 0.823549 4026.0  
weighted avg 0.823570 0.823670 0.823549 4026.0  
The result of Model Number:Dataset Number:Featuregroup Number:Rescale of 46 : 0 : 6 :  
0

|              | f1-score | precision | recall   | support |
|--------------|----------|-----------|----------|---------|
| AFIB         | 0.847916 | 0.850171  | 0.845724 | 875.0   |
| GSVT         | 0.864221 | 0.858133  | 0.870447 | 691.0   |
| SB           | 0.913583 | 0.904268  | 0.923110 | 1553.0  |
| SR           | 0.871822 | 0.890812  | 0.853656 | 907.0   |
| macro avg    | 0.874385 | 0.875846  | 0.873234 | 4026.0  |
| micro avg    | 0.881605 | 0.881605  | 0.881605 | 4026.0  |
| weighted avg | 0.881431 | 0.881561  | 0.881605 | 4026.0  |

The result of Model Number:Dataset Number:Featuregroup Number:Rescale of 46 : 0 : 6 :  
1

|              | f1-score | precision | recall   | support |
|--------------|----------|-----------|----------|---------|
| AFIB         | 0.881426 | 0.876988  | 0.885948 | 875.0   |
| GSVT         | 0.898594 | 0.902945  | 0.894300 | 691.0   |
| SB           | 0.957058 | 0.954855  | 0.959274 | 1553.0  |
| SR           | 0.933099 | 0.938091  | 0.928169 | 907.0   |
| macro avg    | 0.917544 | 0.918220  | 0.916923 | 4026.0  |
| micro avg    | 0.925178 | 0.925178  | 0.925178 | 4026.0  |
| weighted avg | 0.925188 | 0.925245  | 0.925178 | 4026.0  |

The result of Model Number:Dataset Number:Featuregroup Number:Rescale of 46 : 0 : 7 :  
0

|              | f1-score | precision | recall   | support |
|--------------|----------|-----------|----------|---------|
| AFIB         | 0.800547 | 0.816168  | 0.785651 | 204.0   |
| GSVT         | 0.820500 | 0.809912  | 0.831422 | 300.0   |
| SB           | 0.834465 | 0.826215  | 0.842884 | 892.0   |
| SR           | 0.817023 | 0.828374  | 0.805983 | 681.0   |
| macro avg    | 0.818134 | 0.820167  | 0.816485 | 2077.0  |
| micro avg    | 0.823508 | 0.823508  | 0.823508 | 2077.0  |
| weighted avg | 0.823397 | 0.823581  | 0.823508 | 2077.0  |

The result of Model Number:Dataset Number:Featuregroup Number:Rescale of 46 : 0 : 7 :  
1

|              | f1-score | precision | recall   | support |
|--------------|----------|-----------|----------|---------|
| AFIB         | 0.884687 | 0.900923  | 0.869452 | 204.0   |
| GSVT         | 0.918271 | 0.910888  | 0.925943 | 300.0   |
| SB           | 0.935305 | 0.933635  | 0.936983 | 892.0   |
| SR           | 0.926044 | 0.926869  | 0.925226 | 681.0   |
| macro avg    | 0.916077 | 0.918079  | 0.914401 | 2077.0  |
| micro avg    | 0.924901 | 0.924901  | 0.924901 | 2077.0  |
| weighted avg | 0.924837 | 0.924918  | 0.924901 | 2077.0  |

The result of Model Number:Dataset Number:Featuregroup Number:Rescale of 46 : 0 : 8 :  
0



f1-score precision recall support  
AFIB 0.760629 0.760386 0.760912 875.0  
GSVT 0.771965 0.762042 0.782240 691.0  
SB 0.816538 0.814762 0.818325 1553.0  
SR 0.793946 0.805584 0.782652 907.0  
macro avg 0.785770 0.785693 0.786032 4026.0  
micro avg 0.791617 0.791617 0.791617 4026.0  
weighted avg 0.791647 0.791828 0.791617 4026.0  
The result of Model Number:Dataset Number:Featuregroup Number:Rescale of 46 : 0 : 8 :  
1

f1-score precision recall support  
AFIB 0.701614 0.765158 0.648984 204.0  
GSVT 0.814351 0.805046 0.824125 300.0  
SB 0.863571 0.861361 0.865798 892.0  
SR 0.842428 0.831020 0.854177 681.0  
macro avg 0.805491 0.815646 0.798271 2077.0  
micro avg 0.834673 0.834673 0.834673 2077.0  
weighted avg 0.833622 0.833830 0.834673 2077.0  
The result of Model Number:Dataset Number:Featuregroup Number:Rescale of 46 : 0 : 9 :  
0

f1-score precision recall support  
AFIB 0.874039 0.942162 0.815508 204.0  
GSVT 0.900692 0.915939 0.885983 300.0  
SB 0.954564 0.945779 0.963544 892.0  
SR 0.916572 0.903280 0.930303 681.0  
macro avg 0.911467 0.926790 0.898834 2077.0  
micro avg 0.926902 0.926902 0.926902 2077.0  
weighted avg 0.926417 0.927179 0.926902 2077.0  
The result of Model Number:Dataset Number:Featuregroup Number:Rescale of 46 : 0 : 9 :  
1

f1-score precision recall support  
AFIB 0.823675 0.817333 0.830179 875.0  
GSVT 0.834369 0.838243 0.830712 691.0  
SB 0.894142 0.889386 0.898969 1553.0  
SR 0.867798 0.879999 0.856026 907.0  
macro avg 0.854996 0.856240 0.853972 4026.0  
micro avg 0.862629 0.862629 0.862629 4026.0  
weighted avg 0.862633 0.862833 0.862629 4026.0  
The result of Model Number:Dataset Number:Featuregroup Number:Rescale of 46 : 0 :  
10 : 0

f1-score precision recall support  
AFIB 0.749857 0.751719 0.748054 875.0  
GSVT 0.762770 0.765062 0.760589 691.0  
SB 0.809162 0.803669 0.814735 1553.0

SR 0.793764 0.799657 0.787989 907.0  
macro avg 0.778888 0.780027 0.777842 4026.0  
micro avg 0.784924 0.784924 0.784924 4026.0  
weighted avg 0.784841 0.784848 0.784924 4026.0  
The result of Model Number:Dataset Number:Featuregroup Number:Rescale of 46 : 0 :  
10 : 1

f1-score precision recall support  
AFIB 0.765361 0.776195 0.755453 204.0  
GSVT 0.781251 0.766867 0.796329 300.0  
SB 0.797902 0.789080 0.806937 892.0  
SR 0.781134 0.797043 0.765894 681.0  
macro avg 0.781412 0.782296 0.781153 2077.0  
micro avg 0.786891 0.786891 0.786891 2077.0  
weighted avg 0.786803 0.787217 0.786891 2077.0

The result of Model Number:Dataset Number:Featuregroup Number:Rescale of 46 : 1 : 0 :  
0

f1-score precision recall support  
AFIB 0.760886 0.751911 0.770116 875.0  
GSVT 0.773775 0.778671 0.768968 691.0  
SB 0.824994 0.823884 0.826109 1553.0  
SR 0.804726 0.812350 0.797271 907.0  
macro avg 0.791095 0.791704 0.790616 4026.0  
micro avg 0.797636 0.797636 0.797636 4026.0  
weighted avg 0.797704 0.797883 0.797636 4026.0

The result of Model Number:Dataset Number:Featuregroup Number:Rescale of 46 : 1 : 0 :  
1

f1-score precision recall support  
AFIB 0.789535 0.811206 0.769051 204.0  
GSVT 0.807392 0.794989 0.820266 300.0  
SB 0.825132 0.817151 0.833272 892.0  
SR 0.804277 0.814327 0.794478 681.0  
macro avg 0.806584 0.809418 0.804267 2077.0  
micro avg 0.812366 0.812366 0.812366 2077.0  
weighted avg 0.812236 0.812440 0.812366 2077.0

The result of Model Number:Dataset Number:Featuregroup Number:Rescale of 46 : 1 : 1 :  
0

f1-score precision recall support  
AFIB 0.712496 0.746608 0.681532 204.0  
GSVT 0.750450 0.742416 0.758687 300.0  
SB 0.766390 0.762156 0.770681 892.0  
SR 0.757733 0.757076 0.758404 681.0  
macro avg 0.746767 0.752064 0.742326 2077.0  
micro avg 0.756167 0.756167 0.756167 2077.0  
weighted avg 0.755956 0.756112 0.756167 2077.0

The result of Model Number:Dataset Number:Featuregroup Number:Rescale of 46 : 1 : 1 : 1

|              | f1-score | precision | recall   | support |
|--------------|----------|-----------|----------|---------|
| AFIB         | 0.747517 | 0.815218  | 0.691444 | 204.0   |
| GSVT         | 0.867630 | 0.857716  | 0.878043 | 300.0   |
| SB           | 0.920070 | 0.917715  | 0.922442 | 892.0   |
| SR           | 0.897543 | 0.885389  | 0.910061 | 681.0   |
| macro avg    | 0.858190 | 0.869010  | 0.850498 | 2077.0  |
| micro avg    | 0.889282 | 0.889282  | 0.889282 | 2077.0  |
| weighted avg | 0.888162 | 0.888383  | 0.889282 | 2077.0  |

The result of Model Number:Dataset Number:Featuregroup Number:Rescale of 46 : 1 : 2 : 0

|              | f1-score | precision | recall   | support |
|--------------|----------|-----------|----------|---------|
| AFIB         | 0.751434 | 0.743131  | 0.759939 | 875.0   |
| GSVT         | 0.764973 | 0.769683  | 0.760333 | 691.0   |
| SB           | 0.814167 | 0.812812  | 0.815530 | 1553.0  |
| SR           | 0.794342 | 0.801770  | 0.787071 | 907.0   |
| macro avg    | 0.781229 | 0.781849  | 0.780718 | 4026.0  |
| micro avg    | 0.787563 | 0.787563  | 0.787563 | 4026.0  |
| weighted avg | 0.787623 | 0.787778  | 0.787563 | 4026.0  |

The result of Model Number:Dataset Number:Featuregroup Number:Rescale of 46 : 1 : 2 : 1

|              | f1-score | precision | recall   | support |
|--------------|----------|-----------|----------|---------|
| AFIB         | 0.669343 | 0.736874  | 0.613543 | 204.0   |
| GSVT         | 0.789351 | 0.778456  | 0.800682 | 300.0   |
| SB           | 0.838138 | 0.835342  | 0.840957 | 892.0   |
| SR           | 0.816674 | 0.805376  | 0.828305 | 681.0   |
| macro avg    | 0.778377 | 0.789012  | 0.770872 | 2077.0  |
| micro avg    | 0.808655 | 0.808655  | 0.808655 | 2077.0  |
| weighted avg | 0.807475 | 0.807629  | 0.808655 | 2077.0  |

The result of Model Number:Dataset Number:Featuregroup Number:Rescale of 46 : 1 : 3 : 0

|              | f1-score | precision | recall   | support |
|--------------|----------|-----------|----------|---------|
| AFIB         | 0.821793 | 0.836869  | 0.807314 | 204.0   |
| GSVT         | 0.832631 | 0.824228  | 0.841224 | 300.0   |
| SB           | 0.853141 | 0.848700  | 0.857634 | 892.0   |
| SR           | 0.841526 | 0.846799  | 0.836337 | 681.0   |
| macro avg    | 0.837273 | 0.839149  | 0.835627 | 2077.0  |
| micro avg    | 0.843339 | 0.843339  | 0.843339 | 2077.0  |
| weighted avg | 0.843291 | 0.843380  | 0.843339 | 2077.0  |

The result of Model Number:Dataset Number:Featuregroup Number:Rescale of 46 : 1 : 3 : 1

|      | f1-score | precision | recall   | support |
|------|----------|-----------|----------|---------|
| AFIB | 0.783859 | 0.790072  | 0.777763 | 875.0   |

GSVT 0.793797 0.790297 0.797354 691.0  
SB 0.844109 0.840772 0.847479 1553.0  
SR 0.823367 0.825693 0.821093 907.0  
macro avg 0.811283 0.811709 0.810922 4026.0  
micro avg 0.817780 0.817780 0.817780 4026.0  
weighted avg 0.817706 0.817693 0.817780 4026.0  
The result of Model Number:Dataset Number:Featuregroup Number:Rescale of 46 : 1 : 4 :  
0

f1-score precision recall support

AFIB 0.689375 0.687255 0.691552 875.0  
GSVT 0.671802 0.675096 0.668646 691.0  
SB 0.706252 0.676944 0.738220 1553.0  
SR 0.607788 0.663131 0.561019 907.0  
macro avg 0.668804 0.675607 0.664859 4026.0  
micro avg 0.676215 0.676215 0.676215 4026.0  
weighted avg 0.674489 0.675756 0.676215 4026.0  
The result of Model Number:Dataset Number:Featuregroup Number:Rescale of 46 : 1 : 4 :  
1

f1-score precision recall support

AFIB 0.852175 0.868833 0.836294 204.0  
GSVT 0.875591 0.869283 0.882022 300.0  
SB 0.891262 0.887794 0.894759 892.0  
SR 0.881520 0.884014 0.879058 681.0  
macro avg 0.875137 0.877481 0.873033 2077.0  
micro avg 0.882029 0.882029 0.882029 2077.0  
weighted avg 0.881965 0.882018 0.882029 2077.0  
The result of Model Number:Dataset Number:Featuregroup Number:Rescale of 46 : 1 : 5 :  
0

f1-score precision recall support

AFIB 0.678214 0.747096 0.621612 204.0  
GSVT 0.626327 0.669637 0.588571 300.0  
SB 0.681884 0.637134 0.733405 892.0  
SR 0.590182 0.621205 0.562271 681.0  
macro avg 0.644152 0.668768 0.626465 2077.0  
micro avg 0.645394 0.645394 0.645394 2077.0  
weighted avg 0.643432 0.647406 0.645394 2077.0  
The result of Model Number:Dataset Number:Featuregroup Number:Rescale of 46 : 1 : 5 :  
1

f1-score precision recall support

AFIB 0.614454 0.616963 0.611984 875.0  
GSVT 0.572175 0.597427 0.549065 691.0  
SB 0.614482 0.556641 0.685746 1553.0  
SR 0.463525 0.576901 0.387549 907.0  
macro avg 0.566159 0.586983 0.558586 4026.0

micro avg 0.579076 0.579076 0.579076 4026.0  
weighted avg 0.573206 0.581316 0.579076 4026.0  
The result of Model Number:Dataset Number:Featuregroup Number:Rescale of 46 : 1 : 6 :  
0

|              | f1-score | precision | recall   | support |
|--------------|----------|-----------|----------|---------|
| AFIB         | 0.693948 | 0.700707  | 0.687486 | 204.0   |
| GSVT         | 0.709995 | 0.706735  | 0.713310 | 300.0   |
| SB           | 0.719807 | 0.717330  | 0.722306 | 892.0   |
| SR           | 0.713728 | 0.716497  | 0.711014 | 681.0   |
| macro avg    | 0.709369 | 0.710317  | 0.708529 | 2077.0  |
| micro avg    | 0.713884 | 0.713884  | 0.713884 | 2077.0  |
| weighted avg | 0.713857 | 0.713894  | 0.713884 | 2077.0  |

The result of Model Number:Dataset Number:Featuregroup Number:Rescale of 46 : 1 : 6 :  
1

|              | f1-score | precision | recall   | support |
|--------------|----------|-----------|----------|---------|
| AFIB         | 0.769123 | 0.783233  | 0.755572 | 204.0   |
| GSVT         | 0.779267 | 0.771403  | 0.787309 | 300.0   |
| SB           | 0.798462 | 0.794306  | 0.802667 | 892.0   |
| SR           | 0.787592 | 0.792527  | 0.782735 | 681.0   |
| macro avg    | 0.783611 | 0.785367  | 0.782071 | 2077.0  |
| micro avg    | 0.789288 | 0.789288  | 0.789288 | 2077.0  |
| weighted avg | 0.789244 | 0.789327  | 0.789288 | 2077.0  |

The result of Model Number:Dataset Number:Featuregroup Number:Rescale of 46 : 1 : 7 :  
0

|              | f1-score | precision | recall   | support |
|--------------|----------|-----------|----------|---------|
| AFIB         | 0.825132 | 0.832743  | 0.817859 | 204.0   |
| GSVT         | 0.855299 | 0.855329  | 0.855291 | 300.0   |
| SB           | 0.873211 | 0.871660  | 0.874775 | 892.0   |
| SR           | 0.863944 | 0.863712  | 0.864196 | 681.0   |
| macro avg    | 0.854396 | 0.855861  | 0.853030 | 2077.0  |
| micro avg    | 0.862902 | 0.862902  | 0.862902 | 2077.0  |
| weighted avg | 0.862863 | 0.862873  | 0.862902 | 2077.0  |

The result of Model Number:Dataset Number:Featuregroup Number:Rescale of 46 : 1 : 7 :  
1

|              | f1-score | precision | recall   | support |
|--------------|----------|-----------|----------|---------|
| AFIB         | 0.713960 | 0.789452  | 0.652016 | 204.0   |
| GSVT         | 0.821504 | 0.811996  | 0.831393 | 300.0   |
| SB           | 0.868558 | 0.864987  | 0.872161 | 892.0   |
| SR           | 0.849905 | 0.837317  | 0.862888 | 681.0   |
| macro avg    | 0.813482 | 0.825938  | 0.804615 | 2077.0  |
| micro avg    | 0.841610 | 0.841610  | 0.841610 | 2077.0  |
| weighted avg | 0.840462 | 0.840842  | 0.841610 | 2077.0  |

The result of Model Number:Dataset Number:Featuregroup Number:Rescale of 46 : 1 : 8 :  
0

f1-score precision recall support  
AFIB 0.698759 0.702222 0.695405 875.0  
GSVT 0.705717 0.706733 0.704810 691.0  
SB 0.742862 0.739415 0.746349 1553.0  
SR 0.729187 0.731013 0.727410 907.0  
macro avg 0.719131 0.719846 0.718493 4026.0  
micro avg 0.723881 0.723881 0.723881 4026.0  
weighted avg 0.723821 0.723830 0.723881 4026.0  
The result of Model Number:Dataset Number:Featuregroup Number:Rescale of 46 : 1 : 8 :  
1

f1-score precision recall support  
AFIB 0.840818 0.854797 0.827482 204.0  
GSVT 0.856941 0.850853 0.863181 300.0  
SB 0.876817 0.871890 0.881821 892.0  
SR 0.865647 0.870943 0.860442 681.0  
macro avg 0.860056 0.862121 0.858232 2077.0  
micro avg 0.866782 0.866782 0.866782 2077.0  
weighted avg 0.866748 0.866862 0.866782 2077.0  
The result of Model Number:Dataset Number:Featuregroup Number:Rescale of 46 : 1 : 9 :  
0

f1-score precision recall support  
AFIB 0.608191 0.590668 0.667302 875.0  
GSVT 0.670308 0.668167 0.672549 691.0  
SB 0.565838 0.557499 0.574477 1553.0  
SR 0.677524 0.690748 0.664882 907.0  
macro avg 0.630465 0.626771 0.644802 4026.0  
micro avg 0.631851 0.631851 0.631851 4026.0  
weighted avg 0.618135 0.613722 0.631851 4026.0  
The result of Model Number:Dataset Number:Featuregroup Number:Rescale of 46 : 1 : 9 :  
1

f1-score precision recall support  
AFIB 0.710137 0.699523 0.721104 875.0  
GSVT 0.723752 0.729942 0.717678 691.0  
SB 0.773313 0.770650 0.775999 1553.0  
SR 0.750678 0.761875 0.739832 907.0  
macro avg 0.739470 0.740498 0.738654 4026.0  
micro avg 0.745911 0.745911 0.745911 4026.0  
weighted avg 0.745977 0.746228 0.745911 4026.0  
The result of Model Number:Dataset Number:Featuregroup Number:Rescale of 46 : 1 :  
10 : 0

f1-score precision recall support  
AFIB 0.766976 0.756095 0.778194 875.0  
GSVT 0.782756 0.790385 0.775278 691.0  
SB 0.833005 0.830290 0.835739 1553.0

SR 0.813552 0.823950 0.803422 907.0  
macro avg 0.799072 0.800180 0.798158 4026.0  
micro avg 0.805575 0.805575 0.805575 4026.0  
weighted avg 0.805647 0.805887 0.805575 4026.0  
The result of Model Number:Dataset Number:Featuregroup Number:Rescale of 46 : 1 :  
10 : 1

f1-score precision recall support  
AFIB 0.870828 0.857476 0.884748 875.0  
GSVT 0.900856 0.909686 0.892373 691.0  
SB 0.958751 0.956511 0.961031 1553.0  
SR 0.934801 0.946653 0.923261 907.0  
macro avg 0.916309 0.917581 0.915353 4026.0  
micro avg 0.924159 0.924159 0.924159 4026.0  
weighted avg 0.924309 0.924729 0.924159 4026.0  
The result of Model Number:Dataset Number:Featuregroup Number:Rescale of 47 : 0 : 0 :  
0

f1-score precision recall support  
AFIB 0.839721 0.847466 0.832319 204.0  
GSVT 0.870421 0.870452 0.870413 300.0  
SB 0.888650 0.887071 0.890242 892.0  
SR 0.879219 0.878983 0.879476 681.0  
macro avg 0.869503 0.870993 0.868112 2077.0  
micro avg 0.878159 0.878159 0.878159 2077.0  
weighted avg 0.878119 0.878129 0.878159 2077.0  
The result of Model Number:Dataset Number:Featuregroup Number:Rescale of 47 : 0 : 0 :  
1

f1-score precision recall support  
AFIB 0.686970 0.700993 0.673800 204.0  
GSVT 0.711915 0.705729 0.718339 300.0  
SB 0.725602 0.724307 0.726904 892.0  
SR 0.718848 0.719277 0.718425 681.0  
macro avg 0.710834 0.712577 0.709367 2077.0  
micro avg 0.717671 0.717671 0.717671 2077.0  
weighted avg 0.717616 0.717684 0.717671 2077.0  
The result of Model Number:Dataset Number:Featuregroup Number:Rescale of 47 : 0 : 1 :  
0

f1-score precision recall support  
AFIB 0.786840 0.799617 0.774507 875.0  
GSVT 0.836828 0.839450 0.834272 691.0  
SB 0.910426 0.907289 0.913590 1553.0  
SR 0.861908 0.852308 0.871779 907.0  
macro avg 0.849001 0.849666 0.848537 4026.0  
micro avg 0.860329 0.860329 0.860329 4026.0  
weighted avg 0.860004 0.859858 0.860329 4026.0

The result of Model Number:Dataset Number:Featuregroup Number:Rescale of 47 : 0 : 1 :  
1

|              | f1-score | precision | recall   | support |
|--------------|----------|-----------|----------|---------|
| AFIB         | 0.597718 | 0.659156  | 0.547123 | 204.0   |
| GSVT         | 0.711267 | 0.701654  | 0.721216 | 300.0   |
| SB           | 0.757448 | 0.754419  | 0.760505 | 892.0   |
| SR           | 0.736890 | 0.726929  | 0.747160 | 681.0   |
| macro avg    | 0.700831 | 0.710540  | 0.694001 | 2077.0  |
| micro avg    | 0.729496 | 0.729496  | 0.729496 | 2077.0  |
| weighted avg | 0.728349 | 0.728428  | 0.729496 | 2077.0  |

The result of Model Number:Dataset Number:Featuregroup Number:Rescale of 47 : 0 : 2 :  
0

|              | f1-score | precision | recall   | support |
|--------------|----------|-----------|----------|---------|
| AFIB         | 0.779016 | 0.781930  | 0.776455 | 875.0   |
| GSVT         | 0.796552 | 0.804236  | 0.789172 | 691.0   |
| SB           | 0.846984 | 0.838100  | 0.856123 | 1553.0  |
| SR           | 0.817654 | 0.824850  | 0.810863 | 907.0   |
| macro avg    | 0.810051 | 0.812279  | 0.808153 | 4026.0  |
| micro avg    | 0.817121 | 0.817121  | 0.817121 | 4026.0  |
| weighted avg | 0.816948 | 0.817095  | 0.817121 | 4026.0  |

The result of Model Number:Dataset Number:Featuregroup Number:Rescale of 47 : 0 : 2 :  
1

|              | f1-score | precision | recall   | support |
|--------------|----------|-----------|----------|---------|
| AFIB         | 0.718700 | 0.720349  | 0.717136 | 875.0   |
| GSVT         | 0.721205 | 0.719172  | 0.723274 | 691.0   |
| SB           | 0.756894 | 0.750626  | 0.763277 | 1553.0  |
| SR           | 0.734187 | 0.745205  | 0.723521 | 907.0   |
| macro avg    | 0.732746 | 0.733838  | 0.731802 | 4026.0  |
| micro avg    | 0.737427 | 0.737427  | 0.737427 | 4026.0  |
| weighted avg | 0.737352 | 0.737426  | 0.737427 | 4026.0  |

The result of Model Number:Dataset Number:Featuregroup Number:Rescale of 47 : 0 : 3 :  
0

|              | f1-score | precision | recall   | support |
|--------------|----------|-----------|----------|---------|
| AFIB         | 0.667105 | 0.656425  | 0.750628 | 204.0   |
| GSVT         | 0.781004 | 0.771941  | 0.790566 | 300.0   |
| SB           | 0.807155 | 0.804107  | 0.810231 | 892.0   |
| SR           | 0.633308 | 0.636583  | 0.630175 | 681.0   |
| macro avg    | 0.722143 | 0.717264  | 0.745400 | 2077.0  |
| micro avg    | 0.742500 | 0.742500  | 0.742500 | 2077.0  |
| weighted avg | 0.732622 | 0.730028  | 0.742500 | 2077.0  |

The result of Model Number:Dataset Number:Featuregroup Number:Rescale of 47 : 0 : 3 :  
1

|      | f1-score | precision | recall   | support |
|------|----------|-----------|----------|---------|
| AFIB | 0.768669 | 0.766446  | 0.770974 | 875.0   |



GSVT 0.782915 0.782278 0.783607 691.0  
SB 0.831569 0.828125 0.835049 1553.0  
SR 0.806605 0.815466 0.797978 907.0  
macro avg 0.797439 0.798079 0.796902 4026.0  
micro avg 0.803942 0.803942 0.803942 4026.0  
weighted avg 0.803924 0.803999 0.803942 4026.0  
The result of Model Number:Dataset Number:Featuregroup Number:Rescale of 47 : 0 : 4 :  
0

f1-score precision recall support  
AFIB 0.612276 0.675211 0.560450 204.0  
GSVT 0.728591 0.718745 0.738783 300.0  
SB 0.775897 0.772794 0.779028 892.0  
SR 0.754838 0.744635 0.765358 681.0  
macro avg 0.717901 0.727846 0.710905 2077.0  
micro avg 0.747265 0.747265 0.747265 2077.0  
weighted avg 0.746089 0.746170 0.747265 2077.0  
The result of Model Number:Dataset Number:Featuregroup Number:Rescale of 47 : 0 : 4 :  
1

f1-score precision recall support  
AFIB 0.683554 0.685907 0.681305 875.0  
GSVT 0.696532 0.682635 0.711132 691.0  
SB 0.737335 0.733347 0.741370 1553.0  
SR 0.708816 0.725297 0.693110 907.0  
macro avg 0.706559 0.706796 0.706729 4026.0  
micro avg 0.712253 0.712253 0.712253 4026.0  
weighted avg 0.712218 0.712519 0.712253 4026.0  
The result of Model Number:Dataset Number:Featuregroup Number:Rescale of 47 : 0 : 5 :  
0

f1-score precision recall support  
AFIB 0.719490 0.727904 0.711404 204.0  
GSVT 0.648984 0.624207 0.740481 300.0  
SB 0.602124 0.600706 0.603556 892.0  
SR 0.747635 0.749073 0.746209 681.0  
macro avg 0.679559 0.675472 0.700413 2077.0  
micro avg 0.680699 0.680699 0.680699 2077.0  
weighted avg 0.668130 0.665239 0.680699 2077.0  
The result of Model Number:Dataset Number:Featuregroup Number:Rescale of 47 : 0 : 5 :  
1

f1-score precision recall support  
AFIB 0.739117 0.741660 0.736684 875.0  
GSVT 0.753149 0.738123 0.768935 691.0  
SB 0.797268 0.792957 0.801631 1553.0  
SR 0.766432 0.784252 0.749449 907.0  
macro avg 0.763991 0.764248 0.764175 4026.0

micro avg 0.770148 0.770148 0.770148 4026.0  
weighted avg 0.770110 0.770436 0.770148 4026.0  
The result of Model Number:Dataset Number:Featuregroup Number:Rescale of 47 : 0 : 6 :  
0

|              | f1-score | precision | recall   | support |
|--------------|----------|-----------|----------|---------|
| AFIB         | 0.679087 | 0.716308  | 0.645994 | 204.0   |
| GSVT         | 0.646635 | 0.669306  | 0.625529 | 300.0   |
| SB           | 0.665128 | 0.639474  | 0.692936 | 892.0   |
| SR           | 0.591982 | 0.608042  | 0.576781 | 681.0   |
| macro avg    | 0.645708 | 0.658283  | 0.635310 | 2077.0  |
| micro avg    | 0.640505 | 0.640505  | 0.640505 | 2077.0  |
| weighted avg | 0.639845 | 0.641024  | 0.640505 | 2077.0  |

The result of Model Number:Dataset Number:Featuregroup Number:Rescale of 47 : 0 : 6 :  
1

|              | f1-score | precision | recall   | support |
|--------------|----------|-----------|----------|---------|
| AFIB         | 0.652727 | 0.654543  | 0.650955 | 875.0   |
| GSVT         | 0.667679 | 0.667494  | 0.667871 | 691.0   |
| SB           | 0.711099 | 0.704415  | 0.717919 | 1553.0  |
| SR           | 0.692257 | 0.702240  | 0.682562 | 907.0   |
| macro avg    | 0.680940 | 0.682173  | 0.679827 | 4026.0  |
| micro avg    | 0.686810 | 0.686810  | 0.686810 | 4026.0  |
| weighted avg | 0.686715 | 0.686749  | 0.686810 | 4026.0  |

The result of Model Number:Dataset Number:Featuregroup Number:Rescale of 47 : 0 : 7 :  
0

|              | f1-score | precision | recall   | support |
|--------------|----------|-----------|----------|---------|
| AFIB         | 0.764524 | 0.781812  | 0.748006 | 875.0   |
| GSVT         | 0.810569 | 0.814018  | 0.807196 | 691.0   |
| SB           | 0.880110 | 0.875962  | 0.884302 | 1553.0  |
| SR           | 0.833892 | 0.821101  | 0.847122 | 907.0   |
| macro avg    | 0.822273 | 0.823223  | 0.821657 | 4026.0  |
| micro avg    | 0.833070 | 0.833070  | 0.833070 | 4026.0  |
| weighted avg | 0.832641 | 0.832509  | 0.833070 | 4026.0  |

The result of Model Number:Dataset Number:Featuregroup Number:Rescale of 47 : 0 : 7 :  
1

|              | f1-score | precision | recall   | support |
|--------------|----------|-----------|----------|---------|
| AFIB         | 0.742156 | 0.743325  | 0.741087 | 204.0   |
| GSVT         | 0.760105 | 0.758919  | 0.761358 | 300.0   |
| SB           | 0.775785 | 0.774839  | 0.776740 | 892.0   |
| SR           | 0.770352 | 0.771830  | 0.768883 | 681.0   |
| macro avg    | 0.762099 | 0.762228  | 0.762017 | 2077.0  |
| micro avg    | 0.768440 | 0.768440  | 0.768440 | 2077.0  |
| weighted avg | 0.768436 | 0.768458  | 0.768440 | 2077.0  |

The result of Model Number:Dataset Number:Featuregroup Number:Rescale of 47 : 0 : 8 :  
0

f1-score precision recall support  
AFIB 0.681112 0.671449 0.691074 875.0  
GSVT 0.695125 0.701900 0.688485 691.0  
SB 0.739749 0.737338 0.742177 1553.0  
SR 0.722473 0.731707 0.713477 907.0  
macro avg 0.709615 0.710599 0.708803 4026.0  
micro avg 0.715389 0.715389 0.715389 4026.0  
weighted avg 0.715454 0.715667 0.715389 4026.0  
The result of Model Number:Dataset Number:Featuregroup Number:Rescale of 47 : 0 : 8 :  
1

f1-score precision recall support  
AFIB 0.890986 0.890932 0.891095 875.0  
GSVT 0.892914 0.888087 0.897810 691.0  
SB 0.935572 0.929347 0.941893 1553.0  
SR 0.910729 0.925672 0.896295 907.0  
macro avg 0.907550 0.908509 0.906773 4026.0  
micro avg 0.913014 0.913014 0.913014 4026.0  
weighted avg 0.912963 0.913088 0.913014 4026.0  
The result of Model Number:Dataset Number:Featuregroup Number:Rescale of 47 : 0 : 9 :  
0

f1-score precision recall support  
AFIB 0.704411 0.706161 0.702718 875.0  
GSVT 0.716542 0.718695 0.714493 691.0  
SB 0.760122 0.754963 0.765358 1553.0  
SR 0.745658 0.751193 0.740232 907.0  
macro avg 0.731684 0.732753 0.730700 4026.0  
micro avg 0.737353 0.737353 0.737353 4026.0  
weighted avg 0.737276 0.737282 0.737353 4026.0  
The result of Model Number:Dataset Number:Featuregroup Number:Rescale of 47 : 0 : 9 :  
1

f1-score precision recall support  
AFIB 0.863565 0.876806 0.850860 204.0  
GSVT 0.884041 0.876540 0.891708 300.0  
SB 0.899419 0.896517 0.902343 892.0  
SR 0.890177 0.893481 0.886908 681.0  
macro avg 0.884300 0.885836 0.882955 2077.0  
micro avg 0.890690 0.890690 0.890690 2077.0  
weighted avg 0.890646 0.890700 0.890690 2077.0  
The result of Model Number:Dataset Number:Featuregroup Number:Rescale of 47 : 0 :  
10 : 0

f1-score precision recall support  
AFIB 0.881034 0.897204 0.865862 204.0  
GSVT 0.914480 0.907127 0.922120 300.0  
SB 0.931444 0.929781 0.933115 892.0

SR 0.922221 0.923042 0.921407 681.0  
macro avg 0.912295 0.914289 0.910626 2077.0  
micro avg 0.921082 0.921082 0.921082 2077.0  
weighted avg 0.921019 0.921100 0.921082 2077.0  
The result of Model Number:Dataset Number:Featuregroup Number:Rescale of 47 : 0 :  
10 : 1

f1-score precision recall support  
AFIB 0.827600 0.802864 0.882437 875.0  
GSVT 0.708717 0.693197 0.725210 691.0  
SB 0.940028 0.932369 0.948064 1553.0  
SR 0.881882 0.918907 0.849380 907.0  
macro avg 0.839557 0.836834 0.851272 4026.0  
micro avg 0.873319 0.873319 0.873319 4026.0  
weighted avg 0.862793 0.860140 0.873319 4026.0

The result of Model Number:Dataset Number:Featuregroup Number:Rescale of 47 : 1 : 0 :  
0

f1-score precision recall support  
AFIB 0.760497 0.777280 0.744479 204.0  
GSVT 0.777117 0.764230 0.790539 300.0  
SB 0.792050 0.785855 0.798352 892.0  
SR 0.772828 0.782130 0.763746 681.0  
macro avg 0.775623 0.777374 0.774279 2077.0  
micro avg 0.780586 0.780586 0.780586 2077.0  
weighted avg 0.780491 0.780668 0.780586 2077.0

The result of Model Number:Dataset Number:Featuregroup Number:Rescale of 47 : 1 : 0 :  
1

f1-score precision recall support  
AFIB 0.745366 0.787768 0.707790 204.0  
GSVT 0.787684 0.779010 0.796593 300.0  
SB 0.799401 0.791447 0.807544 892.0  
SR 0.790114 0.792815 0.787556 681.0  
macro avg 0.780641 0.787760 0.774871 2077.0  
micro avg 0.789611 0.789611 0.789611 2077.0  
weighted avg 0.789356 0.789738 0.789611 2077.0

The result of Model Number:Dataset Number:Featuregroup Number:Rescale of 47 : 1 : 1 :  
0

f1-score precision recall support  
AFIB 0.879001 0.889054 0.869512 204.0  
GSVT 0.899575 0.894252 0.904977 300.0  
SB 0.863576 0.831677 0.917421 892.0  
SR 0.724404 0.727910 0.720950 681.0  
macro avg 0.841639 0.835723 0.853215 2077.0  
micro avg 0.846500 0.846500 0.846500 2077.0  
weighted avg 0.824659 0.812328 0.846500 2077.0

The result of Model Number:Dataset Number:Featuregroup Number:Rescale of 47 : 1 : 1 : 1

|              | f1-score | precision | recall   | support |
|--------------|----------|-----------|----------|---------|
| AFIB         | 0.699723 | 0.689788  | 0.710027 | 875.0   |
| GSVT         | 0.725099 | 0.734349  | 0.716188 | 691.0   |
| SB           | 0.770580 | 0.769449  | 0.771722 | 1553.0  |
| SR           | 0.751383 | 0.757019  | 0.745832 | 907.0   |
| macro avg    | 0.736696 | 0.737651  | 0.735942 | 4026.0  |
| micro avg    | 0.742949 | 0.742949  | 0.742949 | 4026.0  |
| weighted avg | 0.743049 | 0.743311  | 0.742949 | 4026.0  |

The result of Model Number:Dataset Number:Featuregroup Number:Rescale of 47 : 1 : 2 : 0

|              | f1-score | precision | recall   | support |
|--------------|----------|-----------|----------|---------|
| AFIB         | 0.768547 | 0.767311  | 0.770102 | 875.0   |
| GSVT         | 0.786467 | 0.782367  | 0.790655 | 691.0   |
| SB           | 0.822292 | 0.815325  | 0.829385 | 1553.0  |
| SR           | 0.790902 | 0.808485  | 0.774334 | 907.0   |
| macro avg    | 0.792052 | 0.793372  | 0.791119 | 4026.0  |
| micro avg    | 0.797451 | 0.797451  | 0.797451 | 4026.0  |
| weighted avg | 0.797390 | 0.797692  | 0.797451 | 4026.0  |

The result of Model Number:Dataset Number:Featuregroup Number:Rescale of 47 : 1 : 2 : 1

|              | f1-score | precision | recall   | support |
|--------------|----------|-----------|----------|---------|
| AFIB         | 0.779697 | 0.803343  | 0.757437 | 875.0   |
| GSVT         | 0.832338 | 0.826566  | 0.838236 | 691.0   |
| SB           | 0.910679 | 0.907196  | 0.914196 | 1553.0  |
| SR           | 0.861283 | 0.848356  | 0.874660 | 907.0   |
| macro avg    | 0.845999 | 0.846365  | 0.846132 | 4026.0  |
| micro avg    | 0.858182 | 0.858182  | 0.858182 | 4026.0  |
| weighted avg | 0.857638 | 0.857530  | 0.858182 | 4026.0  |

The result of Model Number:Dataset Number:Featuregroup Number:Rescale of 47 : 1 : 3 : 0

|              | f1-score | precision | recall   | support |
|--------------|----------|-----------|----------|---------|
| AFIB         | 0.797450 | 0.790059  | 0.805026 | 875.0   |
| GSVT         | 0.811772 | 0.816180  | 0.807424 | 691.0   |
| SB           | 0.860118 | 0.858135  | 0.862111 | 1553.0  |
| SR           | 0.840078 | 0.847831  | 0.832493 | 907.0   |
| macro avg    | 0.827355 | 0.828051  | 0.826763 | 4026.0  |
| micro avg    | 0.833646 | 0.833646  | 0.833646 | 4026.0  |
| weighted avg | 0.833685 | 0.833817  | 0.833646 | 4026.0  |

The result of Model Number:Dataset Number:Featuregroup Number:Rescale of 47 : 1 : 3 : 1

|      | f1-score | precision | recall   | support |
|------|----------|-----------|----------|---------|
| AFIB | 0.879835 | 0.883839  | 0.875921 | 875.0   |

GSVT 0.884110 0.875298 0.893177 691.0  
SB 0.931854 0.921699 0.942234 1553.0  
SR 0.891217 0.912316 0.871076 907.0  
macro avg 0.896754 0.898288 0.895602 4026.0  
micro avg 0.903371 0.903371 0.903371 4026.0  
weighted avg 0.903199 0.903393 0.903371 4026.0  
The result of Model Number:Dataset Number:Featuregroup Number:Rescale of 47 : 1 : 4 :  
0

f1-score precision recall support  
AFIB 0.828094 0.875202 0.786348 204.0  
GSVT 0.875109 0.865472 0.885007 300.0  
SB 0.888126 0.879289 0.897173 892.0  
SR 0.877809 0.880810 0.874967 681.0  
macro avg 0.867285 0.875193 0.860874 2077.0  
micro avg 0.877250 0.877250 0.877250 2077.0  
weighted avg 0.876967 0.877391 0.877250 2077.0  
The result of Model Number:Dataset Number:Featuregroup Number:Rescale of 47 : 1 : 4 :  
1

f1-score precision recall support  
AFIB 0.784321 0.801630 0.767801 204.0  
GSVT 0.801461 0.788171 0.815304 300.0  
SB 0.816862 0.810473 0.823362 892.0  
SR 0.797038 0.806631 0.787672 681.0  
macro avg 0.799920 0.801726 0.798535 2077.0  
micro avg 0.805039 0.805039 0.805039 2077.0  
weighted avg 0.804941 0.805123 0.805039 2077.0  
The result of Model Number:Dataset Number:Featuregroup Number:Rescale of 47 : 1 : 5 :  
0

f1-score precision recall support  
AFIB 0.845291 0.857967 0.833224 204.0  
GSVT 0.875815 0.873490 0.878158 300.0  
SB 0.896562 0.895367 0.897767 892.0  
SR 0.887793 0.886648 0.888969 681.0  
macro avg 0.876365 0.878368 0.874530 2077.0  
micro avg 0.885711 0.885711 0.885711 2077.0  
weighted avg 0.885654 0.885675 0.885711 2077.0  
The result of Model Number:Dataset Number:Featuregroup Number:Rescale of 47 : 1 : 5 :  
1

f1-score precision recall support  
AFIB 0.833667 0.853623 0.815843 204.0  
GSVT 0.858217 0.846124 0.871018 300.0  
SB 0.880516 0.871570 0.889687 892.0  
SR 0.859470 0.871880 0.847477 681.0  
macro avg 0.857968 0.860800 0.856007 2077.0

micro avg 0.865898 0.865898 0.865898 2077.0  
weighted avg 0.865793 0.866234 0.865898 2077.0  
The result of Model Number:Dataset Number:Featuregroup Number:Rescale of 47 : 1 : 6 :  
0

|              | f1-score | precision | recall   | support |
|--------------|----------|-----------|----------|---------|
| AFIB         | 0.768642 | 0.757996  | 0.779623 | 875.0   |
| GSVT         | 0.785690 | 0.792049  | 0.779437 | 691.0   |
| SB           | 0.834001 | 0.831604  | 0.836417 | 1553.0  |
| SR           | 0.813712 | 0.824303  | 0.803398 | 907.0   |
| macro avg    | 0.800512 | 0.801488  | 0.799719 | 4026.0  |
| micro avg    | 0.806855 | 0.806855  | 0.806855 | 4026.0  |
| weighted avg | 0.806934 | 0.807173  | 0.806855 | 4026.0  |

The result of Model Number:Dataset Number:Featuregroup Number:Rescale of 47 : 1 : 6 :  
1

|              | f1-score | precision | recall   | support |
|--------------|----------|-----------|----------|---------|
| AFIB         | 0.771313 | 0.770607  | 0.772113 | 875.0   |
| GSVT         | 0.787123 | 0.785596  | 0.788738 | 691.0   |
| SB           | 0.835240 | 0.833380  | 0.837121 | 1553.0  |
| SR           | 0.812443 | 0.817743  | 0.807240 | 907.0   |
| macro avg    | 0.801530 | 0.801831  | 0.801303 | 4026.0  |
| micro avg    | 0.807957 | 0.807957  | 0.807957 | 4026.0  |
| weighted avg | 0.807952 | 0.808013  | 0.807957 | 4026.0  |

The result of Model Number:Dataset Number:Featuregroup Number:Rescale of 47 : 1 : 7 :  
0

|              | f1-score | precision | recall   | support |
|--------------|----------|-----------|----------|---------|
| AFIB         | 0.813363 | 0.812047  | 0.814755 | 875.0   |
| GSVT         | 0.820815 | 0.824079  | 0.817618 | 691.0   |
| SB           | 0.861999 | 0.858866  | 0.865162 | 1553.0  |
| SR           | 0.847899 | 0.852189  | 0.843700 | 907.0   |
| macro avg    | 0.836019 | 0.836795  | 0.835309 | 4026.0  |
| micro avg    | 0.841211 | 0.841211  | 0.841211 | 4026.0  |
| weighted avg | 0.841184 | 0.841215  | 0.841211 | 4026.0  |

The result of Model Number:Dataset Number:Featuregroup Number:Rescale of 47 : 1 : 7 :  
1

|              | f1-score | precision | recall   | support |
|--------------|----------|-----------|----------|---------|
| AFIB         | 0.840064 | 0.855482  | 0.825597 | 204.0   |
| GSVT         | 0.871954 | 0.864943  | 0.879239 | 300.0   |
| SB           | 0.888129 | 0.886544  | 0.889722 | 892.0   |
| SR           | 0.879336 | 0.880118  | 0.878559 | 681.0   |
| macro avg    | 0.869871 | 0.871772  | 0.868280 | 2077.0  |
| micro avg    | 0.878250 | 0.878250  | 0.878250 | 2077.0  |
| weighted avg | 0.878189 | 0.878266  | 0.878250 | 2077.0  |

The result of Model Number:Dataset Number:Featuregroup Number:Rescale of 47 : 1 : 8 :  
0

f1-score precision recall support  
AFIB 0.832452 0.836698 0.828275 875.0  
GSVT 0.843940 0.839549 0.848450 691.0  
SB 0.884581 0.883790 0.885379 1553.0  
SR 0.868292 0.869000 0.867621 907.0  
macro avg 0.857316 0.857259 0.857431 4026.0  
micro avg 0.862629 0.862629 0.862629 4026.0  
weighted avg 0.862606 0.862630 0.862629 4026.0  
The result of Model Number:Dataset Number:Featuregroup Number:Rescale of 47 : 1 : 8 :  
1

f1-score precision recall support  
AFIB 0.627797 0.609710 0.688814 875.0  
GSVT 0.691917 0.689707 0.694230 691.0  
SB 0.584080 0.575472 0.592996 1553.0  
SR 0.699365 0.713016 0.686316 907.0  
macro avg 0.650790 0.646976 0.665589 4026.0  
micro avg 0.652220 0.652220 0.652220 4026.0  
weighted avg 0.638062 0.633506 0.652220 4026.0  
The result of Model Number:Dataset Number:Featuregroup Number:Rescale of 47 : 1 : 9 :  
0

f1-score precision recall support  
AFIB 0.802127 0.817670 0.787524 204.0  
GSVT 0.833232 0.826265 0.840471 300.0  
SB 0.848779 0.847076 0.850491 892.0  
SR 0.840686 0.841557 0.839820 681.0  
macro avg 0.831206 0.833142 0.829577 2077.0  
micro avg 0.839361 0.839361 0.839361 2077.0  
weighted avg 0.839298 0.839372 0.839361 2077.0  
The result of Model Number:Dataset Number:Featuregroup Number:Rescale of 47 : 1 : 9 :  
1

f1-score precision recall support  
AFIB 0.705839 0.701616 0.710208 875.0  
GSVT 0.711619 0.715461 0.707921 691.0  
SB 0.754210 0.752005 0.756439 1553.0  
SR 0.737167 0.742462 0.731961 907.0  
macro avg 0.727209 0.727886 0.726632 4026.0  
micro avg 0.732549 0.732549 0.732549 4026.0  
weighted avg 0.732547 0.732631 0.732549 4026.0  
The result of Model Number:Dataset Number:Featuregroup Number:Rescale of 47 : 1 :  
10 : 0

f1-score precision recall support  
AFIB 0.668816 0.742249 0.608766 204.0  
GSVT 0.780933 0.771170 0.791100 300.0  
SB 0.830875 0.826635 0.835159 892.0



SR 0.811410 0.800066 0.823084 681.0  
macro avg 0.773009 0.785030 0.764527 2077.0  
micro avg 0.802600 0.802600 0.802600 2077.0  
weighted avg 0.801362 0.801624 0.802600 2077.0  
The result of Model Number:Dataset Number:Featuregroup Number:Rescale of 47 : 1 :  
10 : 1

f1-score precision recall support  
AFIB 0.870691 0.864207 0.877361 875.0  
GSVT 0.886930 0.890097 0.883839 691.0  
SB 0.941142 0.938912 0.943383 1553.0  
SR 0.919664 0.927944 0.911564 907.0  
macro avg 0.904607 0.905290 0.904037 4026.0  
micro avg 0.911646 0.911646 0.911646 4026.0  
weighted avg 0.911687 0.911826 0.911646 4026.0

The result of Model Number:Dataset Number:Featuregroup Number:Rescale of 48 : 0 : 0 :  
0

f1-score precision recall support  
AFIB 0.665335 0.681004 0.650428 875.0  
GSVT 0.701362 0.703133 0.699646 691.0  
SB 0.762744 0.759582 0.765935 1553.0  
SR 0.725756 0.714326 0.737592 907.0  
macro avg 0.713799 0.714511 0.713400 4026.0  
micro avg 0.723068 0.723068 0.723068 4026.0  
weighted avg 0.722705 0.722620 0.723068 4026.0

The result of Model Number:Dataset Number:Featuregroup Number:Rescale of 48 : 0 : 0 :  
1

f1-score precision recall support  
AFIB 0.707479 0.712568 0.702464 875.0  
GSVT 0.706352 0.702123 0.710644 691.0  
SB 0.745098 0.736843 0.753542 1553.0  
SR 0.714979 0.727735 0.702686 907.0  
macro avg 0.718477 0.719817 0.717334 4026.0  
micro avg 0.723621 0.723621 0.723621 4026.0  
weighted avg 0.723486 0.723556 0.723621 4026.0

The result of Model Number:Dataset Number:Featuregroup Number:Rescale of 48 : 0 : 1 :  
0

f1-score precision recall support  
AFIB 0.674127 0.757996 0.607563 204.0  
GSVT 0.799803 0.782724 0.817679 300.0  
SB 0.853804 0.849452 0.858206 892.0  
SR 0.834650 0.824080 0.845548 681.0  
macro avg 0.790596 0.803563 0.782249 2077.0  
micro avg 0.823584 0.823584 0.823584 2077.0  
weighted avg 0.822076 0.822512 0.823584 2077.0

The result of Model Number:Dataset Number:Featuregroup Number:Rescale of 48 : 0 : 1 : 1

|              | f1-score | precision | recall   | support |
|--------------|----------|-----------|----------|---------|
| AFIB         | 0.822710 | 0.826787  | 0.818761 | 875.0   |
| GSVT         | 0.830901 | 0.832098  | 0.829833 | 691.0   |
| SB           | 0.874636 | 0.870578  | 0.878741 | 1553.0  |
| SR           | 0.858535 | 0.860685  | 0.856443 | 907.0   |
| macro avg    | 0.846695 | 0.847537  | 0.845945 | 4026.0  |
| micro avg    | 0.852287 | 0.852287  | 0.852287 | 4026.0  |
| weighted avg | 0.852217 | 0.852227  | 0.852287 | 4026.0  |

The result of Model Number:Dataset Number:Featuregroup Number:Rescale of 48 : 0 : 2 : 0

|              | f1-score | precision | recall   | support |
|--------------|----------|-----------|----------|---------|
| AFIB         | 0.747202 | 0.747558  | 0.746954 | 875.0   |
| GSVT         | 0.766553 | 0.759918  | 0.773332 | 691.0   |
| SB           | 0.818682 | 0.812716  | 0.824743 | 1553.0  |
| SR           | 0.783706 | 0.799286  | 0.768763 | 907.0   |
| macro avg    | 0.779036 | 0.779869  | 0.778448 | 4026.0  |
| micro avg    | 0.786401 | 0.786401  | 0.786401 | 4026.0  |
| weighted avg | 0.786320 | 0.786467  | 0.786401 | 4026.0  |

The result of Model Number:Dataset Number:Featuregroup Number:Rescale of 48 : 0 : 2 : 1

|              | f1-score | precision | recall   | support |
|--------------|----------|-----------|----------|---------|
| AFIB         | 0.780446 | 0.792813  | 0.768563 | 204.0   |
| GSVT         | 0.800507 | 0.793694  | 0.807441 | 300.0   |
| SB           | 0.814327 | 0.812513  | 0.816153 | 892.0   |
| SR           | 0.806612 | 0.808405  | 0.804842 | 681.0   |
| macro avg    | 0.800473 | 0.801856  | 0.799250 | 2077.0  |
| micro avg    | 0.806512 | 0.806512  | 0.806512 | 2077.0  |
| weighted avg | 0.806474 | 0.806513  | 0.806512 | 2077.0  |

The result of Model Number:Dataset Number:Featuregroup Number:Rescale of 48 : 0 : 3 : 0

|              | f1-score | precision | recall   | support |
|--------------|----------|-----------|----------|---------|
| AFIB         | 0.781640 | 0.763256  | 0.822896 | 875.0   |
| GSVT         | 0.751086 | 0.744161  | 0.768201 | 691.0   |
| SB           | 0.814603 | 0.757246  | 0.882300 | 1553.0  |
| SR           | 0.507915 | 0.637007  | 0.422982 | 907.0   |
| macro avg    | 0.713811 | 0.725418  | 0.724095 | 4026.0  |
| micro avg    | 0.746328 | 0.746328  | 0.746328 | 4026.0  |
| weighted avg | 0.727445 | 0.729218  | 0.746328 | 4026.0  |

The result of Model Number:Dataset Number:Featuregroup Number:Rescale of 48 : 0 : 3 : 1

|      | f1-score | precision | recall   | support |
|------|----------|-----------|----------|---------|
| AFIB | 0.724730 | 0.726955  | 0.722634 | 204.0   |

GSVT 0.743768 0.741878 0.745735 300.0  
SB 0.760384 0.759455 0.761319 892.0  
SR 0.754160 0.755610 0.752722 681.0  
macro avg 0.745761 0.745974 0.745603 2077.0  
micro avg 0.752450 0.752450 0.752450 2077.0  
weighted avg 0.752441 0.752463 0.752450 2077.0  
The result of Model Number:Dataset Number:Featuregroup Number:Rescale of 48 : 0 : 4 :  
0

f1-score precision recall support  
AFIB 0.632111 0.627732 0.636679 875.0  
GSVT 0.641863 0.644468 0.639383 691.0  
SB 0.696422 0.689181 0.703821 1553.0  
SR 0.661259 0.676646 0.646617 907.0  
macro avg 0.657914 0.659507 0.656625 4026.0  
micro avg 0.665282 0.665282 0.665282 4026.0  
weighted avg 0.665159 0.665327 0.665282 4026.0  
The result of Model Number:Dataset Number:Featuregroup Number:Rescale of 48 : 0 : 4 :  
1

f1-score precision recall support  
AFIB 0.878546 0.887896 0.869876 204.0  
GSVT 0.904364 0.898338 0.910736 300.0  
SB 0.923475 0.922650 0.924304 892.0  
SR 0.915689 0.916911 0.914476 681.0  
macro avg 0.905519 0.906449 0.904848 2077.0  
micro avg 0.913776 0.913776 0.913776 2077.0  
weighted avg 0.913749 0.913843 0.913776 2077.0  
The result of Model Number:Dataset Number:Featuregroup Number:Rescale of 48 : 0 : 5 :  
0

f1-score precision recall support  
AFIB 0.888014 0.899773 0.876691 204.0  
GSVT 0.914812 0.911510 0.918158 300.0  
SB 0.926206 0.923324 0.929111 892.0  
SR 0.916114 0.917878 0.914382 681.0  
macro avg 0.911286 0.913121 0.909585 2077.0  
micro avg 0.917551 0.917551 0.917551 2077.0  
weighted avg 0.917500 0.917519 0.917551 2077.0  
The result of Model Number:Dataset Number:Featuregroup Number:Rescale of 48 : 0 : 5 :  
1

f1-score precision recall support  
AFIB 0.608463 0.621249 0.596215 875.0  
GSVT 0.647941 0.650167 0.645763 691.0  
SB 0.705941 0.702614 0.709303 1553.0  
SR 0.668253 0.659353 0.677451 907.0  
macro avg 0.657650 0.658346 0.657183 4026.0

micro avg 0.666643 0.666643 0.666643 4026.0  
weighted avg 0.666310 0.666183 0.666643 4026.0  
The result of Model Number:Dataset Number:Featuregroup Number:Rescale of 48 : 0 : 6 :  
0

|              | f1-score | precision | recall   | support |
|--------------|----------|-----------|----------|---------|
| AFIB         | 0.872092 | 0.907292  | 0.839591 | 204.0   |
| GSVT         | 0.904545 | 0.889851  | 0.919888 | 300.0   |
| SB           | 0.927946 | 0.920486  | 0.935540 | 892.0   |
| SR           | 0.902981 | 0.909483  | 0.896619 | 681.0   |
| macro avg    | 0.901891 | 0.906778  | 0.897910 | 2077.0  |
| micro avg    | 0.911094 | 0.911094  | 0.911094 | 2077.0  |
| weighted avg | 0.910895 | 0.911158  | 0.911094 | 2077.0  |

The result of Model Number:Dataset Number:Featuregroup Number:Rescale of 48 : 0 : 6 :  
1

|              | f1-score | precision | recall   | support |
|--------------|----------|-----------|----------|---------|
| AFIB         | 0.621320 | 0.602749  | 0.662489 | 875.0   |
| GSVT         | 0.532069 | 0.520417  | 0.544451 | 691.0   |
| SB           | 0.705726 | 0.699976  | 0.711758 | 1553.0  |
| SR           | 0.662072 | 0.689869  | 0.637671 | 907.0   |
| macro avg    | 0.630297 | 0.628253  | 0.639092 | 4026.0  |
| micro avg    | 0.655644 | 0.655644  | 0.655644 | 4026.0  |
| weighted avg | 0.647741 | 0.645749  | 0.655644 | 4026.0  |

The result of Model Number:Dataset Number:Featuregroup Number:Rescale of 48 : 0 : 7 :  
0

|              | f1-score | precision | recall   | support |
|--------------|----------|-----------|----------|---------|
| AFIB         | 0.781778 | 0.775759  | 0.787951 | 875.0   |
| GSVT         | 0.791928 | 0.795605  | 0.788458 | 691.0   |
| SB           | 0.848661 | 0.844147  | 0.853243 | 1553.0  |
| SR           | 0.823657 | 0.835237  | 0.812484 | 907.0   |
| macro avg    | 0.811506 | 0.812687  | 0.810534 | 4026.0  |
| micro avg    | 0.818751 | 0.818751  | 0.818751 | 4026.0  |
| weighted avg | 0.818755 | 0.818945  | 0.818751 | 4026.0  |

The result of Model Number:Dataset Number:Featuregroup Number:Rescale of 48 : 0 : 7 :  
1

|              | f1-score | precision | recall   | support |
|--------------|----------|-----------|----------|---------|
| AFIB         | 0.685024 | 0.686930  | 0.683165 | 875.0   |
| GSVT         | 0.700716 | 0.700522  | 0.700918 | 691.0   |
| SB           | 0.746285 | 0.739270  | 0.753442 | 1553.0  |
| SR           | 0.726510 | 0.736987  | 0.716336 | 907.0   |
| macro avg    | 0.714634 | 0.715927  | 0.713465 | 4026.0  |
| micro avg    | 0.720794 | 0.720794  | 0.720794 | 4026.0  |
| weighted avg | 0.720695 | 0.720730  | 0.720794 | 4026.0  |

The result of Model Number:Dataset Number:Featuregroup Number:Rescale of 48 : 0 : 8 :  
0

f1-score precision recall support  
AFIB 0.718991 0.700592 0.738449 875.0  
GSVT 0.679669 0.718191 0.645227 691.0  
SB 0.720687 0.663205 0.789096 1553.0  
SR 0.575707 0.699272 0.489358 907.0  
macro avg 0.673764 0.695315 0.665533 4026.0  
micro avg 0.685869 0.685869 0.685869 4026.0  
weighted avg 0.680616 0.688894 0.685869 4026.0  
The result of Model Number:Dataset Number:Featuregroup Number:Rescale of 48 : 0 : 8 :  
1

f1-score precision recall support  
AFIB 0.854285 0.846730 0.862012 875.0  
GSVT 0.776693 0.752168 0.864087 691.0  
SB 0.700231 0.672318 0.743881 1553.0  
SR 0.721690 0.729157 0.714420 907.0  
macro avg 0.763225 0.750093 0.796100 4026.0  
micro avg 0.783550 0.783550 0.783550 4026.0  
weighted avg 0.751671 0.736735 0.783550 4026.0  
The result of Model Number:Dataset Number:Featuregroup Number:Rescale of 48 : 0 : 9 :  
0

f1-score precision recall support  
AFIB 0.845650 0.862037 0.830255 204.0  
GSVT 0.878443 0.871098 0.886074 300.0  
SB 0.894834 0.893038 0.896639 892.0  
SR 0.886301 0.887219 0.885389 681.0  
macro avg 0.876307 0.878348 0.874589 2077.0  
micro avg 0.884904 0.884904 0.884904 2077.0  
weighted avg 0.884838 0.884916 0.884904 2077.0  
The result of Model Number:Dataset Number:Featuregroup Number:Rescale of 48 : 0 : 9 :  
1

f1-score precision recall support  
AFIB 0.688580 0.705103 0.673126 204.0  
GSVT 0.713064 0.708931 0.717331 300.0  
SB 0.728293 0.725621 0.730986 892.0  
SR 0.721964 0.722499 0.721437 681.0  
macro avg 0.712975 0.715539 0.710720 2077.0  
micro avg 0.720200 0.720200 0.720200 2077.0  
weighted avg 0.720117 0.720172 0.720200 2077.0  
The result of Model Number:Dataset Number:Featuregroup Number:Rescale of 48 : 0 :  
10 : 0

f1-score precision recall support  
AFIB 0.727326 0.727094 0.727597 875.0  
GSVT 0.738166 0.728677 0.747991 691.0  
SB 0.780787 0.779089 0.782496 1553.0

SR 0.759184 0.770313 0.748385 907.0  
macro avg 0.751366 0.751293 0.751617 4026.0  
micro avg 0.756958 0.756958 0.756958 4026.0  
weighted avg 0.756986 0.757159 0.756958 4026.0  
The result of Model Number:Dataset Number:Featuregroup Number:Rescale of 48 : 0 :

10 : 1

f1-score precision recall support

AFIB 0.717987 0.744697 0.693449 204.0  
GSVT 0.666266 0.697183 0.638035 300.0  
SB 0.697939 0.655843 0.745823 892.0  
SR 0.612925 0.655511 0.575607 681.0  
macro avg 0.673779 0.688309 0.663229 2077.0  
micro avg 0.669300 0.669300 0.669300 2077.0  
weighted avg 0.667459 0.670433 0.669300 2077.0

The result of Model Number:Dataset Number:Featuregroup Number:Rescale of 48 : 1 : 0 :  
0

f1-score precision recall support

AFIB 0.778541 0.802327 0.756212 875.0  
GSVT 0.826199 0.823400 0.829089 691.0  
SB 0.902824 0.899197 0.906485 1553.0  
SR 0.855075 0.840244 0.870523 907.0  
macro avg 0.840660 0.841292 0.840577 4026.0  
micro avg 0.852439 0.852439 0.852439 4026.0  
weighted avg 0.851904 0.851853 0.852439 4026.0

The result of Model Number:Dataset Number:Featuregroup Number:Rescale of 48 : 1 : 0 :  
1

f1-score precision recall support

AFIB 0.829800 0.816786 0.843326 875.0  
GSVT 0.799567 0.822489 0.777980 691.0  
SB 0.840212 0.797621 0.887656 1553.0  
SR 0.682667 0.759670 0.619945 907.0  
macro avg 0.788061 0.799141 0.782227 4026.0  
micro avg 0.798886 0.798886 0.798886 4026.0  
weighted avg 0.795480 0.797504 0.798886 4026.0

The result of Model Number:Dataset Number:Featuregroup Number:Rescale of 48 : 1 : 1 :  
0

f1-score precision recall support

AFIB 0.910791 0.917709 0.904055 204.0  
GSVT 0.929438 0.920360 0.938717 300.0  
SB 0.951118 0.948687 0.953570 892.0  
SR 0.941029 0.946345 0.935784 681.0  
macro avg 0.933094 0.933275 0.933031 2077.0  
micro avg 0.940730 0.940730 0.940730 2077.0  
weighted avg 0.940718 0.940785 0.940730 2077.0

The result of Model Number:Dataset Number:Featuregroup Number:Rescale of 48 : 1 : 1 : 1

|              | f1-score | precision | recall   | support |
|--------------|----------|-----------|----------|---------|
| AFIB         | 0.620941 | 0.692542  | 0.562840 | 204.0   |
| GSVT         | 0.732153 | 0.719409  | 0.745512 | 300.0   |
| SB           | 0.781713 | 0.778248  | 0.785217 | 892.0   |
| SR           | 0.763573 | 0.753132  | 0.774330 | 681.0   |
| macro avg    | 0.724595 | 0.735833  | 0.716975 | 2077.0  |
| micro avg    | 0.754071 | 0.754071  | 0.754071 | 2077.0  |
| weighted avg | 0.752816 | 0.753097  | 0.754071 | 2077.0  |

The result of Model Number:Dataset Number:Featuregroup Number:Rescale of 48 : 1 : 2 : 0

|              | f1-score | precision | recall   | support |
|--------------|----------|-----------|----------|---------|
| AFIB         | 0.808125 | 0.809525  | 0.806741 | 875.0   |
| GSVT         | 0.817923 | 0.808525  | 0.827610 | 691.0   |
| SB           | 0.861301 | 0.850916  | 0.871947 | 1553.0  |
| SR           | 0.820361 | 0.845218  | 0.796943 | 907.0   |
| macro avg    | 0.826927 | 0.828546  | 0.825810 | 4026.0  |
| micro avg    | 0.833268 | 0.833268  | 0.833268 | 4026.0  |
| weighted avg | 0.833076 | 0.833360  | 0.833268 | 4026.0  |

The result of Model Number:Dataset Number:Featuregroup Number:Rescale of 48 : 1 : 2 : 1

|              | f1-score | precision | recall   | support |
|--------------|----------|-----------|----------|---------|
| AFIB         | 0.760661 | 0.771719  | 0.750261 | 204.0   |
| GSVT         | 0.777437 | 0.766919  | 0.788310 | 300.0   |
| SB           | 0.789138 | 0.780914  | 0.797543 | 892.0   |
| SR           | 0.773497 | 0.786297  | 0.761121 | 681.0   |
| macro avg    | 0.775183 | 0.776462  | 0.774309 | 2077.0  |
| micro avg    | 0.779623 | 0.779623  | 0.779623 | 2077.0  |
| weighted avg | 0.779523 | 0.779754  | 0.779623 | 2077.0  |

The result of Model Number:Dataset Number:Featuregroup Number:Rescale of 48 : 1 : 3 : 0

|              | f1-score | precision | recall   | support |
|--------------|----------|-----------|----------|---------|
| AFIB         | 0.801729 | 0.809484  | 0.794266 | 204.0   |
| GSVT         | 0.830099 | 0.828462  | 0.831755 | 300.0   |
| SB           | 0.847449 | 0.845948  | 0.848967 | 892.0   |
| SR           | 0.839637 | 0.840043  | 0.839266 | 681.0   |
| macro avg    | 0.829728 | 0.830984  | 0.828563 | 2077.0  |
| micro avg    | 0.837927 | 0.837927  | 0.837927 | 2077.0  |
| weighted avg | 0.837891 | 0.837905  | 0.837927 | 2077.0  |

The result of Model Number:Dataset Number:Featuregroup Number:Rescale of 48 : 1 : 3 : 1

|      | f1-score | precision | recall   | support |
|------|----------|-----------|----------|---------|
| AFIB | 0.831305 | 0.830544  | 0.832168 | 875.0   |

GSVT 0.848345 0.846699 0.850086 691.0  
SB 0.900204 0.898199 0.902232 1553.0  
SR 0.875634 0.881346 0.870027 907.0  
macro avg 0.863872 0.864197 0.863628 4026.0  
micro avg 0.870799 0.870799 0.870799 4026.0  
weighted avg 0.870794 0.870859 0.870799 4026.0  
The result of Model Number:Dataset Number:Featuregroup Number:Rescale of 48 : 1 : 4 :  
0

f1-score precision recall support  
AFIB 0.699451 0.737500 0.665315 204.0  
GSVT 0.734295 0.723189 0.745776 300.0  
SB 0.751744 0.746854 0.756710 892.0  
SR 0.742469 0.743139 0.741819 681.0  
macro avg 0.731990 0.737670 0.727405 2077.0  
micro avg 0.741272 0.741272 0.741272 2077.0  
weighted avg 0.741047 0.741299 0.741272 2077.0  
The result of Model Number:Dataset Number:Featuregroup Number:Rescale of 48 : 1 : 4 :  
1

f1-score precision recall support  
AFIB 0.758682 0.768729 0.749008 204.0  
GSVT 0.781577 0.778756 0.784436 300.0  
SB 0.791312 0.788849 0.793793 892.0  
SR 0.782689 0.784197 0.781209 681.0  
macro avg 0.778565 0.780133 0.777112 2077.0  
micro avg 0.783917 0.783917 0.783917 2077.0  
weighted avg 0.783874 0.783890 0.783917 2077.0  
The result of Model Number:Dataset Number:Featuregroup Number:Rescale of 48 : 1 : 5 :  
0

f1-score precision recall support  
AFIB 0.855161 0.863433 0.847201 204.0  
GSVT 0.885422 0.883676 0.887189 300.0  
SB 0.903928 0.902327 0.905547 892.0  
SR 0.895595 0.896028 0.895200 681.0  
macro avg 0.885027 0.886366 0.883784 2077.0  
micro avg 0.893772 0.893772 0.893772 2077.0  
weighted avg 0.893733 0.893748 0.893772 2077.0  
The result of Model Number:Dataset Number:Featuregroup Number:Rescale of 48 : 1 : 5 :  
1

f1-score precision recall support  
AFIB 0.722974 0.717444 0.728685 875.0  
GSVT 0.739608 0.743653 0.735651 691.0  
SB 0.783186 0.782637 0.783741 1553.0  
SR 0.762383 0.766081 0.758760 907.0  
macro avg 0.752038 0.752454 0.751709 4026.0



micro avg 0.757893 0.757893 0.757893 4026.0  
weighted avg 0.757933 0.758047 0.757893 4026.0  
The result of Model Number:Dataset Number:Featuregroup Number:Rescale of 48 : 1 : 6 :  
0

|              | f1-score | precision | recall   | support |
|--------------|----------|-----------|----------|---------|
| AFIB         | 0.697291 | 0.698639  | 0.696001 | 875.0   |
| GSVT         | 0.675557 | 0.672590  | 0.678592 | 691.0   |
| SB           | 0.705877 | 0.662974  | 0.754737 | 1553.0  |
| SR           | 0.568132 | 0.658300  | 0.499824 | 907.0   |
| macro avg    | 0.661714 | 0.673125  | 0.657289 | 4026.0  |
| micro avg    | 0.671474 | 0.671474  | 0.671474 | 4026.0  |
| weighted avg | 0.667775 | 0.671322  | 0.671474 | 4026.0  |

The result of Model Number:Dataset Number:Featuregroup Number:Rescale of 48 : 1 : 6 :  
1

|              | f1-score | precision | recall   | support |
|--------------|----------|-----------|----------|---------|
| AFIB         | 0.857973 | 0.867506  | 0.849086 | 204.0   |
| GSVT         | 0.884549 | 0.879514  | 0.889899 | 300.0   |
| SB           | 0.902146 | 0.900937  | 0.903359 | 892.0   |
| SR           | 0.894471 | 0.895670  | 0.893288 | 681.0   |
| macro avg    | 0.884785 | 0.885907  | 0.883908 | 2077.0  |
| micro avg    | 0.892782 | 0.892782  | 0.892782 | 2077.0  |
| weighted avg | 0.892749 | 0.892832  | 0.892782 | 2077.0  |

The result of Model Number:Dataset Number:Featuregroup Number:Rescale of 48 : 1 : 7 :  
0

|              | f1-score | precision | recall   | support |
|--------------|----------|-----------|----------|---------|
| AFIB         | 0.661287 | 0.672026  | 0.650922 | 875.0   |
| GSVT         | 0.703298 | 0.705503  | 0.701151 | 691.0   |
| SB           | 0.765153 | 0.762517  | 0.767812 | 1553.0  |
| SR           | 0.724377 | 0.716309  | 0.732673 | 907.0   |
| macro avg    | 0.713529 | 0.714089  | 0.713140 | 4026.0  |
| micro avg    | 0.723050 | 0.723050  | 0.723050 | 4026.0  |
| weighted avg | 0.722777 | 0.722654  | 0.723050 | 4026.0  |

The result of Model Number:Dataset Number:Featuregroup Number:Rescale of 48 : 1 : 7 :  
1

|              | f1-score | precision | recall   | support |
|--------------|----------|-----------|----------|---------|
| AFIB         | 0.915894 | 0.924753  | 0.907368 | 204.0   |
| GSVT         | 0.948303 | 0.946433  | 0.950196 | 300.0   |
| SB           | 0.968124 | 0.966409  | 0.969858 | 892.0   |
| SR           | 0.959199 | 0.959663  | 0.958776 | 681.0   |
| macro avg    | 0.947880 | 0.949315  | 0.946549 | 2077.0  |
| micro avg    | 0.957247 | 0.957247  | 0.957247 | 2077.0  |
| weighted avg | 0.957205 | 0.957221  | 0.957247 | 2077.0  |

The result of Model Number:Dataset Number:Featuregroup Number:Rescale of 48 : 1 : 8 :  
0

f1-score precision recall support  
AFIB 0.881383 0.905574 0.858516 204.0  
GSVT 0.901317 0.887471 0.915689 300.0  
SB 0.921120 0.912211 0.930208 892.0  
SR 0.897840 0.909059 0.886901 681.0  
macro avg 0.900415 0.903579 0.897828 2077.0  
micro avg 0.906870 0.906870 0.906870 2077.0  
weighted avg 0.906724 0.906952 0.906870 2077.0  
The result of Model Number:Dataset Number:Featuregroup Number:Rescale of 48 : 1 : 8 :  
1

f1-score precision recall support  
AFIB 0.723953 0.739201 0.709436 204.0  
GSVT 0.746462 0.739642 0.753426 300.0  
SB 0.758653 0.756962 0.760354 892.0  
SR 0.749637 0.750421 0.748863 681.0  
macro avg 0.744676 0.746556 0.743020 2077.0  
micro avg 0.750585 0.750585 0.750585 2077.0  
weighted avg 0.750528 0.750571 0.750585 2077.0  
The result of Model Number:Dataset Number:Featuregroup Number:Rescale of 48 : 1 : 9 :  
0

f1-score precision recall support  
AFIB 0.640170 0.631671 0.648950 875.0  
GSVT 0.653163 0.659355 0.647115 691.0  
SB 0.695059 0.693415 0.696714 1553.0  
SR 0.676203 0.683314 0.669268 907.0  
macro avg 0.666149 0.666939 0.665512 4026.0  
micro avg 0.671637 0.671637 0.671637 4026.0  
weighted avg 0.671691 0.671874 0.671637 4026.0  
The result of Model Number:Dataset Number:Featuregroup Number:Rescale of 48 : 1 : 9 :  
1

f1-score precision recall support  
AFIB 0.730686 0.804898 0.669705 204.0  
GSVT 0.674784 0.721446 0.634107 300.0  
SB 0.734640 0.686428 0.790147 892.0  
SR 0.635843 0.669266 0.605773 681.0  
macro avg 0.693988 0.720510 0.674933 2077.0  
micro avg 0.695327 0.695327 0.695327 2077.0  
weighted avg 0.693213 0.697495 0.695327 2077.0  
The result of Model Number:Dataset Number:Featuregroup Number:Rescale of 48 : 1 :  
10 : 0

f1-score precision recall support  
AFIB 0.650484 0.665307 0.636410 875.0  
GSVT 0.692198 0.693566 0.691067 691.0  
SB 0.757311 0.753166 0.761504 1553.0

SR 0.715772 0.707090 0.724771 907.0  
macro avg 0.703941 0.704782 0.703438 4026.0  
micro avg 0.713952 0.713952 0.713952 4026.0  
weighted avg 0.713560 0.713461 0.713952 4026.0  
The result of Model Number:Dataset Number:Featuregroup Number:Rescale of 48 : 1 :  
10 : 1

f1-score precision recall support  
AFIB 0.932958 0.944535 0.921975 204.0  
GSVT 0.949687 0.943198 0.956365 300.0  
SB 0.972177 0.970658 0.973701 892.0  
SR 0.965193 0.966758 0.963641 681.0  
macro avg 0.955004 0.956287 0.953921 2077.0  
micro avg 0.962818 0.962818 0.962818 2077.0  
weighted avg 0.962786 0.962847 0.962818 2077.0

The result of Model Number:Dataset Number:Featuregroup Number:Rescale of 49 : 0 : 0 :  
0

f1-score precision recall support  
AFIB 0.906773 0.914682 0.899227 204.0  
GSVT 0.938132 0.936601 0.939692 300.0  
SB 0.958073 0.955736 0.960433 892.0  
SR 0.949289 0.950720 0.947895 681.0  
macro avg 0.938067 0.939435 0.936812 2077.0  
micro avg 0.947314 0.947314 0.947314 2077.0  
weighted avg 0.947274 0.947295 0.947314 2077.0

The result of Model Number:Dataset Number:Featuregroup Number:Rescale of 49 : 0 : 0 :  
1

f1-score precision recall support  
AFIB 0.774818 0.796177 0.754730 204.0  
GSVT 0.795438 0.780713 0.810805 300.0  
SB 0.808338 0.800781 0.816041 892.0  
SR 0.788020 0.798726 0.777611 681.0  
macro avg 0.791654 0.794099 0.789797 2077.0  
micro avg 0.796663 0.796663 0.796663 2077.0  
weighted avg 0.796521 0.796757 0.796663 2077.0

The result of Model Number:Dataset Number:Featuregroup Number:Rescale of 49 : 0 : 1 :  
0

f1-score precision recall support  
AFIB 0.862570 0.892515 0.834686 204.0  
GSVT 0.879109 0.869485 0.889056 300.0  
SB 0.902512 0.896032 0.909088 892.0  
SR 0.886394 0.890752 0.882093 681.0  
macro avg 0.882646 0.887196 0.878731 2077.0  
micro avg 0.890036 0.890036 0.890036 2077.0  
weighted avg 0.889924 0.890121 0.890036 2077.0

The result of Model Number:Dataset Number:Featuregroup Number:Rescale of 49 : 0 : 1 :  
1

|              | f1-score | precision | recall   | support |
|--------------|----------|-----------|----------|---------|
| AFIB         | 0.853023 | 0.859910  | 0.846319 | 204.0   |
| GSVT         | 0.872596 | 0.868318  | 0.876948 | 300.0   |
| SB           | 0.889627 | 0.888640  | 0.890623 | 892.0   |
| SR           | 0.882984 | 0.884158  | 0.881819 | 681.0   |
| macro avg    | 0.874557 | 0.875256  | 0.873927 | 2077.0  |
| micro avg    | 0.881410 | 0.881410  | 0.881410 | 2077.0  |
| weighted avg | 0.881394 | 0.881413  | 0.881410 | 2077.0  |

The result of Model Number:Dataset Number:Featuregroup Number:Rescale of 49 : 0 : 2 :  
0

|              | f1-score | precision | recall   | support |
|--------------|----------|-----------|----------|---------|
| AFIB         | 0.691142 | 0.704652  | 0.678262 | 204.0   |
| GSVT         | 0.710133 | 0.705017  | 0.715349 | 300.0   |
| SB           | 0.722843 | 0.720030  | 0.725679 | 892.0   |
| SR           | 0.714942 | 0.716965  | 0.712945 | 681.0   |
| macro avg    | 0.709765 | 0.711666  | 0.708059 | 2077.0  |
| micro avg    | 0.715355 | 0.715355  | 0.715355 | 2077.0  |
| weighted avg | 0.715303 | 0.715346  | 0.715355 | 2077.0  |

The result of Model Number:Dataset Number:Featuregroup Number:Rescale of 49 : 0 : 2 :  
1

|              | f1-score | precision | recall   | support |
|--------------|----------|-----------|----------|---------|
| AFIB         | 0.879905 | 0.903687  | 0.857525 | 204.0   |
| GSVT         | 0.887157 | 0.874098  | 0.900735 | 300.0   |
| SB           | 0.904342 | 0.894721  | 0.914175 | 892.0   |
| SR           | 0.887569 | 0.899765  | 0.875714 | 681.0   |
| macro avg    | 0.889743 | 0.893068  | 0.887037 | 2077.0  |
| micro avg    | 0.894059 | 0.894059  | 0.894059 | 2077.0  |
| weighted avg | 0.893960 | 0.894277  | 0.894059 | 2077.0  |

The result of Model Number:Dataset Number:Featuregroup Number:Rescale of 49 : 0 : 3 :  
0

|              | f1-score | precision | recall   | support |
|--------------|----------|-----------|----------|---------|
| AFIB         | 0.788616 | 0.790209  | 0.787047 | 204.0   |
| GSVT         | 0.810556 | 0.808146  | 0.812985 | 300.0   |
| SB           | 0.823987 | 0.823253  | 0.824725 | 892.0   |
| SR           | 0.816904 | 0.818473  | 0.815352 | 681.0   |
| macro avg    | 0.810016 | 0.810020  | 0.810027 | 2077.0  |
| micro avg    | 0.816256 | 0.816256  | 0.816256 | 2077.0  |
| weighted avg | 0.816251 | 0.816258  | 0.816256 | 2077.0  |

The result of Model Number:Dataset Number:Featuregroup Number:Rescale of 49 : 0 : 3 :  
1

|      | f1-score | precision | recall   | support |
|------|----------|-----------|----------|---------|
| AFIB | 0.929597 | 0.946681  | 0.913233 | 204.0   |

GSVT 0.945212 0.939022 0.951509 300.0  
SB 0.961380 0.956686 0.966122 892.0  
SR 0.951443 0.955399 0.947534 681.0  
macro avg 0.946908 0.949447 0.944600 2077.0  
micro avg 0.952722 0.952722 0.952722 2077.0  
weighted avg 0.952665 0.952730 0.952722 2077.0  
The result of Model Number:Dataset Number:Featuregroup Number:Rescale of 49 : 0 : 4 :  
0

f1-score precision recall support  
AFIB 0.822194 0.834273 0.810535 204.0  
GSVT 0.843026 0.835859 0.850334 300.0  
SB 0.857596 0.854165 0.861057 892.0  
SR 0.849114 0.853282 0.844997 681.0  
macro avg 0.842982 0.844395 0.841731 2077.0  
micro avg 0.849280 0.849280 0.849280 2077.0  
weighted avg 0.849233 0.849277 0.849280 2077.0  
The result of Model Number:Dataset Number:Featuregroup Number:Rescale of 49 : 0 : 4 :  
1

f1-score precision recall support  
AFIB 0.782902 0.784846 0.781019 875.0  
GSVT 0.796384 0.798777 0.794107 691.0  
SB 0.844820 0.839086 0.850639 1553.0  
SR 0.828744 0.834896 0.822714 907.0  
macro avg 0.813212 0.814401 0.812120 4026.0  
micro avg 0.819514 0.819514 0.819514 4026.0  
weighted avg 0.819428 0.819435 0.819514 4026.0  
The result of Model Number:Dataset Number:Featuregroup Number:Rescale of 49 : 0 : 5 :  
0

f1-score precision recall support  
AFIB 0.738535 0.729106 0.748254 875.0  
GSVT 0.751498 0.755808 0.747258 691.0  
SB 0.804432 0.801054 0.807847 1553.0  
SR 0.780746 0.793383 0.768519 907.0  
macro avg 0.768803 0.769838 0.767969 4026.0  
micro avg 0.775636 0.775636 0.775636 4026.0  
weighted avg 0.775689 0.775923 0.775636 4026.0  
The result of Model Number:Dataset Number:Featuregroup Number:Rescale of 49 : 0 : 5 :  
1

f1-score precision recall support  
AFIB 0.790094 0.790305 0.790021 875.0  
GSVT 0.803852 0.800884 0.806943 691.0  
SB 0.859965 0.857877 0.862067 1553.0  
SR 0.839456 0.845480 0.833539 907.0  
macro avg 0.823341 0.823637 0.823142 4026.0

micro avg 0.830520 0.830520 0.830520 4026.0  
weighted avg 0.830528 0.830616 0.830520 4026.0  
The result of Model Number:Dataset Number:Featuregroup Number:Rescale of 49 : 0 : 6 :  
0

|              | f1-score | precision | recall   | support |
|--------------|----------|-----------|----------|---------|
| AFIB         | 0.676321 | 0.744555  | 0.619939 | 204.0   |
| GSVT         | 0.797580 | 0.786571  | 0.809028 | 300.0   |
| SB           | 0.846875 | 0.844049  | 0.849723 | 892.0   |
| SR           | 0.825187 | 0.813771  | 0.836940 | 681.0   |
| macro avg    | 0.786491 | 0.797237  | 0.778908 | 2077.0  |
| micro avg    | 0.817085 | 0.817085  | 0.817085 | 2077.0  |
| weighted avg | 0.815892 | 0.816048  | 0.817085 | 2077.0  |

The result of Model Number:Dataset Number:Featuregroup Number:Rescale of 49 : 0 : 6 :  
1

|              | f1-score | precision | recall   | support |
|--------------|----------|-----------|----------|---------|
| AFIB         | 0.746498 | 0.755036  | 0.738439 | 204.0   |
| GSVT         | 0.763971 | 0.759450  | 0.768558 | 300.0   |
| SB           | 0.733398 | 0.706307  | 0.779126 | 892.0   |
| SR           | 0.615205 | 0.618182  | 0.612272 | 681.0   |
| macro avg    | 0.714768 | 0.709744  | 0.724599 | 2077.0  |
| micro avg    | 0.718896 | 0.718896  | 0.718896 | 2077.0  |
| weighted avg | 0.700348 | 0.689875  | 0.718896 | 2077.0  |

The result of Model Number:Dataset Number:Featuregroup Number:Rescale of 49 : 0 : 7 :  
0

|              | f1-score | precision | recall   | support |
|--------------|----------|-----------|----------|---------|
| AFIB         | 0.871446 | 0.875412  | 0.867570 | 875.0   |
| GSVT         | 0.875681 | 0.866953  | 0.884661 | 691.0   |
| SB           | 0.922969 | 0.912912  | 0.933251 | 1553.0  |
| SR           | 0.882720 | 0.903618  | 0.862771 | 907.0   |
| macro avg    | 0.888204 | 0.889724  | 0.887063 | 4026.0  |
| micro avg    | 0.894758 | 0.894758  | 0.894758 | 4026.0  |
| weighted avg | 0.894587 | 0.894780  | 0.894758 | 4026.0  |

The result of Model Number:Dataset Number:Featuregroup Number:Rescale of 49 : 0 : 7 :  
1

|              | f1-score | precision | recall   | support |
|--------------|----------|-----------|----------|---------|
| AFIB         | 0.711111 | 0.716428  | 0.705899 | 204.0   |
| GSVT         | 0.729281 | 0.725432  | 0.733171 | 300.0   |
| SB           | 0.741588 | 0.740596  | 0.742585 | 892.0   |
| SR           | 0.735057 | 0.736466  | 0.733655 | 681.0   |
| macro avg    | 0.729259 | 0.729731  | 0.728827 | 2077.0  |
| micro avg    | 0.734694 | 0.734694  | 0.734694 | 2077.0  |
| weighted avg | 0.734675 | 0.734678  | 0.734694 | 2077.0  |

The result of Model Number:Dataset Number:Featuregroup Number:Rescale of 49 : 0 : 8 :  
0

f1-score precision recall support  
AFIB 0.749086 0.740250 0.758172 875.0  
GSVT 0.761775 0.766595 0.757043 691.0  
SB 0.812199 0.811107 0.813298 1553.0  
SR 0.792246 0.799752 0.784907 907.0  
macro avg 0.778827 0.779426 0.778355 4026.0  
micro avg 0.785266 0.785266 0.785266 4026.0  
weighted avg 0.785333 0.785509 0.785266 4026.0  
The result of Model Number:Dataset Number:Featuregroup Number:Rescale of 49 : 0 : 8 :  
1

f1-score precision recall support  
AFIB 0.629433 0.620495 0.638701 875.0  
GSVT 0.652259 0.660580 0.644244 691.0  
SB 0.693172 0.692155 0.694199 1553.0  
SR 0.675903 0.680973 0.670910 907.0  
macro avg 0.662692 0.663551 0.662013 4026.0  
micro avg 0.668316 0.668316 0.668316 4026.0  
weighted avg 0.668407 0.668642 0.668316 4026.0  
The result of Model Number:Dataset Number:Featuregroup Number:Rescale of 49 : 0 : 9 :  
0

f1-score precision recall support  
AFIB 0.894461 0.907874 0.881693 204.0  
GSVT 0.926761 0.924300 0.929240 300.0  
SB 0.948714 0.947450 0.949990 892.0  
SR 0.939435 0.938224 0.940680 681.0  
macro avg 0.927343 0.929462 0.925401 2077.0  
micro avg 0.937232 0.937232 0.937232 2077.0  
weighted avg 0.937172 0.937194 0.937232 2077.0  
The result of Model Number:Dataset Number:Featuregroup Number:Rescale of 49 : 0 : 9 :  
1

f1-score precision recall support  
AFIB 0.739370 0.727774 0.751422 875.0  
GSVT 0.712431 0.732855 0.693198 691.0  
SB 0.748647 0.710698 0.790921 1553.0  
SR 0.608271 0.676882 0.552384 907.0  
macro avg 0.702180 0.712052 0.696981 4026.0  
micro avg 0.711825 0.711825 0.711825 4026.0  
weighted avg 0.708790 0.710594 0.711825 4026.0  
The result of Model Number:Dataset Number:Featuregroup Number:Rescale of 49 : 0 :  
10 : 0

f1-score precision recall support  
AFIB 0.702458 0.688271 0.717297 875.0  
GSVT 0.725747 0.737286 0.714720 691.0  
SB 0.772206 0.772162 0.772255 1553.0

SR 0.753483 0.760349 0.746753 907.0  
macro avg 0.738473 0.739517 0.737756 4026.0  
micro avg 0.744690 0.744690 0.744690 4026.0  
weighted avg 0.744855 0.745282 0.744690 4026.0  
The result of Model Number:Dataset Number:Featuregroup Number:Rescale of 49 : 0 :  
10 : 1

f1-score precision recall support  
AFIB 0.822266 0.800666 0.873743 875.0  
GSVT 0.791013 0.748703 0.901738 691.0  
SB 0.749525 0.744789 0.754345 1553.0  
SR 0.728045 0.740589 0.716122 907.0  
macro avg 0.772712 0.758687 0.811487 4026.0  
micro avg 0.796981 0.796981 0.796981 4026.0  
weighted avg 0.767616 0.756659 0.796981 4026.0  
The result of Model Number:Dataset Number:Featuregroup Number:Rescale of 49 : 1 : 0 :  
0

f1-score precision recall support  
AFIB 0.753732 0.831207 0.689932 204.0  
GSVT 0.896920 0.884798 0.909466 300.0  
SB 0.955155 0.951336 0.959010 892.0  
SR 0.929231 0.916670 0.942181 681.0  
macro avg 0.883760 0.896003 0.875147 2077.0  
micro avg 0.919908 0.919908 0.919908 2077.0  
weighted avg 0.918460 0.918560 0.919908 2077.0  
The result of Model Number:Dataset Number:Featuregroup Number:Rescale of 49 : 1 : 0 :  
1

f1-score precision recall support  
AFIB 0.777762 0.779155 0.776398 875.0  
GSVT 0.744759 0.748671 0.740908 691.0  
SB 0.787774 0.744439 0.836474 1553.0  
SR 0.654250 0.736406 0.588643 907.0  
macro avg 0.741136 0.752168 0.735606 4026.0  
micro avg 0.751182 0.751182 0.751182 4026.0  
weighted avg 0.748134 0.750901 0.751182 4026.0  
The result of Model Number:Dataset Number:Featuregroup Number:Rescale of 49 : 1 : 1 :  
0

f1-score precision recall support  
AFIB 0.797082 0.795792 0.798446 875.0  
GSVT 0.804385 0.807584 0.801252 691.0  
SB 0.844745 0.841674 0.847844 1553.0  
SR 0.830927 0.835131 0.826812 907.0  
macro avg 0.819285 0.820045 0.818589 4026.0  
micro avg 0.824373 0.824373 0.824373 4026.0  
weighted avg 0.824346 0.824377 0.824373 4026.0



The result of Model Number:Dataset Number:Featuregroup Number:Rescale of 49 : 1 : 1 : 1

|              | f1-score | precision | recall   | support |
|--------------|----------|-----------|----------|---------|
| AFIB         | 0.774505 | 0.773259  | 0.776071 | 875.0   |
| GSVT         | 0.792563 | 0.788432  | 0.796784 | 691.0   |
| SB           | 0.828666 | 0.821645  | 0.835814 | 1553.0  |
| SR           | 0.797032 | 0.814752  | 0.780336 | 907.0   |
| macro avg    | 0.798192 | 0.799522  | 0.797251 | 4026.0  |
| micro avg    | 0.803632 | 0.803632  | 0.803632 | 4026.0  |
| weighted avg | 0.803572 | 0.803876  | 0.803632 | 4026.0  |

The result of Model Number:Dataset Number:Featuregroup Number:Rescale of 49 : 1 : 2 : 0

|              | f1-score | precision | recall   | support |
|--------------|----------|-----------|----------|---------|
| AFIB         | 0.828290 | 0.897435  | 0.770688 | 204.0   |
| GSVT         | 0.888437 | 0.877266  | 0.900259 | 300.0   |
| SB           | 0.911118 | 0.898353  | 0.924356 | 892.0   |
| SR           | 0.886264 | 0.890416  | 0.882583 | 681.0   |
| macro avg    | 0.878527 | 0.890868  | 0.869471 | 2077.0  |
| micro avg    | 0.892086 | 0.892086  | 0.892086 | 2077.0  |
| weighted avg | 0.891558 | 0.892615  | 0.892086 | 2077.0  |

The result of Model Number:Dataset Number:Featuregroup Number:Rescale of 49 : 1 : 2 : 1

|              | f1-score | precision | recall   | support |
|--------------|----------|-----------|----------|---------|
| AFIB         | 0.866270 | 0.874065  | 0.858885 | 875.0   |
| GSVT         | 0.883916 | 0.865994  | 0.902805 | 691.0   |
| SB           | 0.937399 | 0.926971  | 0.948178 | 1553.0  |
| SR           | 0.900202 | 0.926961  | 0.875156 | 907.0   |
| macro avg    | 0.896947 | 0.898498  | 0.896256 | 4026.0  |
| micro avg    | 0.904533 | 0.904533  | 0.904533 | 4026.0  |
| weighted avg | 0.904381 | 0.905004  | 0.904533 | 4026.0  |

The result of Model Number:Dataset Number:Featuregroup Number:Rescale of 49 : 1 : 3 : 0

|              | f1-score | precision | recall   | support |
|--------------|----------|-----------|----------|---------|
| AFIB         | 0.867471 | 0.899632  | 0.837653 | 204.0   |
| GSVT         | 0.893459 | 0.882287  | 0.905030 | 300.0   |
| SB           | 0.916115 | 0.907756  | 0.924637 | 892.0   |
| SR           | 0.892030 | 0.898952  | 0.885222 | 681.0   |
| macro avg    | 0.892268 | 0.897157  | 0.888135 | 2077.0  |
| micro avg    | 0.900338 | 0.900338  | 0.900338 | 2077.0  |
| weighted avg | 0.900168 | 0.900393  | 0.900338 | 2077.0  |

The result of Model Number:Dataset Number:Featuregroup Number:Rescale of 49 : 1 : 3 : 1

|      | f1-score | precision | recall   | support |
|------|----------|-----------|----------|---------|
| AFIB | 0.805219 | 0.794863  | 0.815906 | 875.0   |

GSVT 0.821611 0.828413 0.814953 691.0  
SB 0.878467 0.874557 0.882422 1553.0  
SR 0.853468 0.866091 0.841228 907.0  
macro avg 0.839691 0.840981 0.838627 4026.0  
micro avg 0.847105 0.847105 0.847105 4026.0  
weighted avg 0.847157 0.847409 0.847105 4026.0  
The result of Model Number:Dataset Number:Featuregroup Number:Rescale of 49 : 1 : 4 :  
0

f1-score precision recall support

AFIB 0.731351 0.725720 0.737126 875.0  
GSVT 0.740846 0.744286 0.737600 691.0  
SB 0.793920 0.789696 0.798206 1553.0  
SR 0.770529 0.781362 0.760076 907.0  
macro avg 0.759161 0.760266 0.758252 4026.0  
micro avg 0.765939 0.765939 0.765939 4026.0  
weighted avg 0.765942 0.766120 0.765939 4026.0  
The result of Model Number:Dataset Number:Featuregroup Number:Rescale of 49 : 1 : 4 :  
1

f1-score precision recall support

AFIB 0.809379 0.824227 0.795118 204.0  
GSVT 0.820054 0.811778 0.828517 300.0  
SB 0.840254 0.835880 0.844679 892.0  
SR 0.828814 0.834008 0.823703 681.0  
macro avg 0.824625 0.826473 0.823004 2077.0  
micro avg 0.830599 0.830599 0.830599 2077.0  
weighted avg 0.830553 0.830640 0.830599 2077.0  
The result of Model Number:Dataset Number:Featuregroup Number:Rescale of 49 : 1 : 5 :  
0

f1-score precision recall support

AFIB 0.749834 0.742804 0.757093 875.0  
GSVT 0.710914 0.693827 0.763174 691.0  
SB 0.822039 0.819020 0.825103 1553.0  
SR 0.639367 0.643851 0.634954 907.0  
macro avg 0.730539 0.724876 0.745081 4026.0  
micro avg 0.756855 0.756855 0.756855 4026.0  
weighted avg 0.746120 0.741505 0.756855 4026.0  
The result of Model Number:Dataset Number:Featuregroup Number:Rescale of 49 : 1 : 5 :  
1

f1-score precision recall support

AFIB 0.666191 0.680670 0.652497 204.0  
GSVT 0.693690 0.689599 0.697850 300.0  
SB 0.708594 0.707022 0.710181 892.0  
SR 0.701490 0.701094 0.701904 681.0  
macro avg 0.692491 0.694596 0.690608 2077.0

micro avg 0.700020 0.700020 0.700020 2077.0  
weighted avg 0.699947 0.699974 0.700020 2077.0  
The result of Model Number:Dataset Number:Featuregroup Number:Rescale of 49 : 1 : 6 :  
0

|              | f1-score | precision | recall   | support |
|--------------|----------|-----------|----------|---------|
| AFIB         | 0.742229 | 0.743664  | 0.740857 | 875.0   |
| GSVT         | 0.719095 | 0.715936  | 0.722325 | 691.0   |
| SB           | 0.751369 | 0.705700  | 0.803378 | 1553.0  |
| SR           | 0.604747 | 0.700725  | 0.532037 | 907.0   |
| macro avg    | 0.704360 | 0.716506  | 0.699649 | 4026.0  |
| micro avg    | 0.714749 | 0.714749  | 0.714749 | 4026.0  |
| weighted avg | 0.710811 | 0.714587  | 0.714749 | 4026.0  |

The result of Model Number:Dataset Number:Featuregroup Number:Rescale of 49 : 1 : 6 :  
1

|              | f1-score | precision | recall   | support |
|--------------|----------|-----------|----------|---------|
| AFIB         | 0.706661 | 0.722020  | 0.692135 | 204.0   |
| GSVT         | 0.735831 | 0.731491  | 0.740244 | 300.0   |
| SB           | 0.751640 | 0.749973  | 0.753323 | 892.0   |
| SR           | 0.744105 | 0.743685  | 0.744544 | 681.0   |
| macro avg    | 0.734559 | 0.736792  | 0.732562 | 2077.0  |
| micro avg    | 0.742546 | 0.742546  | 0.742546 | 2077.0  |
| weighted avg | 0.742468 | 0.742496  | 0.742546 | 2077.0  |

The result of Model Number:Dataset Number:Featuregroup Number:Rescale of 49 : 1 : 7 :  
0

|              | f1-score | precision | recall   | support |
|--------------|----------|-----------|----------|---------|
| AFIB         | 0.682422 | 0.696736  | 0.668702 | 204.0   |
| GSVT         | 0.698253 | 0.694121  | 0.702441 | 300.0   |
| SB           | 0.715276 | 0.713600  | 0.716959 | 892.0   |
| SR           | 0.709234 | 0.709030  | 0.709444 | 681.0   |
| macro avg    | 0.701296 | 0.703372  | 0.699387 | 2077.0  |
| micro avg    | 0.707658 | 0.707658  | 0.707658 | 2077.0  |
| weighted avg | 0.707609 | 0.707632  | 0.707658 | 2077.0  |

The result of Model Number:Dataset Number:Featuregroup Number:Rescale of 49 : 1 : 7 :  
1

|              | f1-score | precision | recall   | support |
|--------------|----------|-----------|----------|---------|
| AFIB         | 0.896261 | 0.906220  | 0.886978 | 204.0   |
| GSVT         | 0.924023 | 0.918763  | 0.929612 | 300.0   |
| SB           | 0.942405 | 0.941142  | 0.943673 | 892.0   |
| SR           | 0.934388 | 0.935640  | 0.933152 | 681.0   |
| macro avg    | 0.924269 | 0.925441  | 0.923354 | 2077.0  |
| micro avg    | 0.932624 | 0.932624  | 0.932624 | 2077.0  |
| weighted avg | 0.932589 | 0.932676  | 0.932624 | 2077.0  |

The result of Model Number:Dataset Number:Featuregroup Number:Rescale of 49 : 1 : 8 :  
0

f1-score precision recall support  
AFIB 0.664392 0.666817 0.662029 875.0  
GSVT 0.675876 0.667075 0.684970 691.0  
SB 0.712441 0.704594 0.720469 1553.0  
SR 0.675190 0.693842 0.657552 907.0  
macro avg 0.681975 0.683082 0.681255 4026.0  
micro avg 0.687501 0.687501 0.687501 4026.0  
weighted avg 0.687330 0.687522 0.687501 4026.0  
The result of Model Number:Dataset Number:Featuregroup Number:Rescale of 49 : 1 : 8 :  
1

f1-score precision recall support  
AFIB 0.763566 0.753746 0.773700 875.0  
GSVT 0.779109 0.785560 0.772796 691.0  
SB 0.833025 0.829317 0.836775 1553.0  
SR 0.809319 0.821289 0.797712 907.0  
macro avg 0.796255 0.797478 0.795246 4026.0  
micro avg 0.803285 0.803285 0.803285 4026.0  
weighted avg 0.803334 0.803574 0.803285 4026.0  
The result of Model Number:Dataset Number:Featuregroup Number:Rescale of 49 : 1 : 9 :  
0

f1-score precision recall support  
AFIB 0.642608 0.634002 0.651492 875.0  
GSVT 0.656976 0.662104 0.651938 691.0  
SB 0.697525 0.695343 0.699725 1553.0  
SR 0.680657 0.689681 0.671879 907.0  
macro avg 0.669442 0.670282 0.668759 4026.0  
micro avg 0.674767 0.674767 0.674767 4026.0  
weighted avg 0.674830 0.675031 0.674767 4026.0  
The result of Model Number:Dataset Number:Featuregroup Number:Rescale of 49 : 1 : 9 :  
1

f1-score precision recall support  
AFIB 0.615949 0.629877 0.602641 875.0  
GSVT 0.653046 0.655825 0.650328 691.0  
SB 0.709072 0.705730 0.712450 1553.0  
SR 0.671836 0.661531 0.682496 907.0  
macro avg 0.662476 0.663241 0.661979 4026.0  
micro avg 0.671174 0.671174 0.671174 4026.0  
weighted avg 0.670828 0.670722 0.671174 4026.0  
The result of Model Number:Dataset Number:Featuregroup Number:Rescale of 49 : 1 :  
10 : 0

f1-score precision recall support  
AFIB 0.695673 0.709272 0.682709 204.0  
GSVT 0.714789 0.709639 0.720039 300.0  
SB 0.727582 0.724750 0.730437 892.0

SR 0.719629 0.721665 0.717619 681.0  
macro avg 0.714418 0.716332 0.712701 2077.0  
micro avg 0.720044 0.720044 0.720044 2077.0  
weighted avg 0.719992 0.720036 0.720044 2077.0  
The result of Model Number:Dataset Number:Featuregroup Number:Rescale of 49 : 1 :  
10 : 1

f1-score precision recall support  
AFIB 0.584902 0.646081 0.534479 204.0  
GSVT 0.688097 0.679012 0.697502 300.0  
SB 0.729724 0.726888 0.732587 892.0  
SR 0.712189 0.702039 0.722645 681.0  
macro avg 0.678728 0.688505 0.671803 2077.0  
micro avg 0.704802 0.704802 0.704802 2077.0  
weighted avg 0.703738 0.703889 0.704802 2077.0

The result of Model Number:Dataset Number:Featuregroup Number:Rescale of 50 : 0 : 0 :  
0

f1-score precision recall support  
AFIB 0.711274 0.694697 0.728777 875.0  
GSVT 0.682798 0.690304 0.675500 691.0  
SB 0.718536 0.672137 0.771832 1553.0  
SR 0.575076 0.690555 0.492993 907.0  
macro avg 0.671921 0.686923 0.667276 4026.0  
micro avg 0.683122 0.683122 0.683122 4026.0  
weighted avg 0.678504 0.684308 0.683122 4026.0

The result of Model Number:Dataset Number:Featuregroup Number:Rescale of 50 : 0 : 0 :  
1

f1-score precision recall support  
AFIB 0.789198 0.807044 0.772147 875.0  
GSVT 0.836729 0.840290 0.833247 691.0  
SB 0.908514 0.904232 0.912842 1553.0  
SR 0.860805 0.847601 0.874462 907.0  
macro avg 0.848811 0.849792 0.848175 4026.0  
micro avg 0.859956 0.859956 0.859956 4026.0  
weighted avg 0.859513 0.859377 0.859956 4026.0

The result of Model Number:Dataset Number:Featuregroup Number:Rescale of 50 : 0 : 1 :  
0

f1-score precision recall support  
AFIB 0.859111 0.875875 0.843125 204.0  
GSVT 0.880523 0.869161 0.892244 300.0  
SB 0.895510 0.886656 0.904545 892.0  
SR 0.876792 0.888974 0.864945 681.0  
macro avg 0.877984 0.880167 0.876215 2077.0  
micro avg 0.883752 0.883752 0.883752 2077.0  
weighted avg 0.883633 0.883830 0.883752 2077.0

The result of Model Number:Dataset Number:Featuregroup Number:Rescale of 50 : 0 : 1 :  
1

|              | f1-score | precision | recall   | support |
|--------------|----------|-----------|----------|---------|
| AFIB         | 0.868050 | 0.849501  | 0.887478 | 875.0   |
| GSVT         | 0.898921 | 0.912667  | 0.885663 | 691.0   |
| SB           | 0.958248 | 0.958375  | 0.958125 | 1553.0  |
| SR           | 0.933561 | 0.943229  | 0.924093 | 907.0   |
| macro avg    | 0.914695 | 0.915943  | 0.913840 | 4026.0  |
| micro avg    | 0.922667 | 0.922667  | 0.922667 | 4026.0  |
| weighted avg | 0.922900 | 0.923455  | 0.922667 | 4026.0  |

The result of Model Number:Dataset Number:Featuregroup Number:Rescale of 50 : 0 : 2 :  
0

|              | f1-score | precision | recall   | support |
|--------------|----------|-----------|----------|---------|
| AFIB         | 0.778081 | 0.770254  | 0.786089 | 875.0   |
| GSVT         | 0.785044 | 0.792033  | 0.778234 | 691.0   |
| SB           | 0.830542 | 0.827993  | 0.833108 | 1553.0  |
| SR           | 0.814458 | 0.821588  | 0.807455 | 907.0   |
| macro avg    | 0.802031 | 0.802967  | 0.801221 | 4026.0  |
| micro avg    | 0.807691 | 0.807691  | 0.807691 | 4026.0  |
| weighted avg | 0.807708 | 0.807829  | 0.807691 | 4026.0  |

The result of Model Number:Dataset Number:Featuregroup Number:Rescale of 50 : 0 : 2 :  
1

|              | f1-score | precision | recall   | support |
|--------------|----------|-----------|----------|---------|
| AFIB         | 0.858239 | 0.869702  | 0.847315 | 204.0   |
| GSVT         | 0.873400 | 0.868080  | 0.878920 | 300.0   |
| SB           | 0.894454 | 0.893661  | 0.895254 | 892.0   |
| SR           | 0.887844 | 0.887979  | 0.887715 | 681.0   |
| macro avg    | 0.878484 | 0.879855  | 0.877301 | 2077.0  |
| micro avg    | 0.885715 | 0.885715  | 0.885715 | 2077.0  |
| weighted avg | 0.885689 | 0.885750  | 0.885715 | 2077.0  |

The result of Model Number:Dataset Number:Featuregroup Number:Rescale of 50 : 0 : 3 :  
0

|              | f1-score | precision | recall   | support |
|--------------|----------|-----------|----------|---------|
| AFIB         | 0.854985 | 0.845010  | 0.867428 | 875.0   |
| GSVT         | 0.879728 | 0.869064  | 0.891365 | 691.0   |
| SB           | 0.892988 | 0.858518  | 0.943548 | 1553.0  |
| SR           | 0.709079 | 0.746482  | 0.675287 | 907.0   |
| macro avg    | 0.834195 | 0.829769  | 0.844407 | 4026.0  |
| micro avg    | 0.857613 | 0.857613  | 0.857613 | 4026.0  |
| weighted avg | 0.841020 | 0.832152  | 0.857613 | 4026.0  |

The result of Model Number:Dataset Number:Featuregroup Number:Rescale of 50 : 0 : 3 :  
1

|      | f1-score | precision | recall   | support |
|------|----------|-----------|----------|---------|
| AFIB | 0.845298 | 0.836795  | 0.853999 | 875.0   |

GSVT 0.852862 0.860456 0.845465 691.0  
SB 0.902291 0.899522 0.905079 1553.0  
SR 0.884818 0.892563 0.877210 907.0  
macro avg 0.871317 0.872334 0.870438 4026.0  
micro avg 0.877467 0.877467 0.877467 4026.0  
weighted avg 0.877484 0.877616 0.877467 4026.0  
The result of Model Number:Dataset Number:Featuregroup Number:Rescale of 50 : 0 : 4 :  
0

f1-score precision recall support

AFIB 0.796057 0.786154 0.806301 875.0  
GSVT 0.820980 0.831260 0.811032 691.0  
SB 0.875871 0.874922 0.876828 1553.0  
SR 0.852247 0.856618 0.847926 907.0  
macro avg 0.836289 0.837238 0.835522 4026.0  
micro avg 0.843696 0.843696 0.843696 4026.0  
weighted avg 0.843781 0.844012 0.843696 4026.0

The result of Model Number:Dataset Number:Featuregroup Number:Rescale of 50 : 0 : 4 :  
1

f1-score precision recall support

AFIB 0.718779 0.724462 0.713210 875.0  
GSVT 0.736866 0.735308 0.738458 691.0  
SB 0.785521 0.778578 0.792599 1553.0  
SR 0.764609 0.772108 0.757273 907.0  
macro avg 0.751444 0.752614 0.750385 4026.0  
micro avg 0.758094 0.758094 0.758094 4026.0  
weighted avg 0.757954 0.757932 0.758094 4026.0

The result of Model Number:Dataset Number:Featuregroup Number:Rescale of 50 : 0 : 5 :  
0

f1-score precision recall support

AFIB 0.670588 0.683696 0.658091 204.0  
GSVT 0.689014 0.684050 0.694075 300.0  
SB 0.701346 0.698617 0.704098 892.0  
SR 0.693680 0.695643 0.691743 681.0  
macro avg 0.688657 0.690502 0.687002 2077.0  
micro avg 0.694081 0.694081 0.694081 2077.0  
weighted avg 0.694030 0.694072 0.694081 2077.0

The result of Model Number:Dataset Number:Featuregroup Number:Rescale of 50 : 0 : 5 :  
1

f1-score precision recall support

AFIB 0.922047 0.930453 0.913913 204.0  
GSVT 0.946109 0.943012 0.949257 300.0  
SB 0.963405 0.962763 0.964052 892.0  
SR 0.954932 0.954658 0.955220 681.0  
macro avg 0.946623 0.947721 0.945610 2077.0

micro avg 0.954095 0.954095 0.954095 2077.0  
weighted avg 0.954067 0.954079 0.954095 2077.0  
The result of Model Number:Dataset Number:Featuregroup Number:Rescale of 50 : 0 : 6 :  
0

|              | f1-score | precision | recall   | support |
|--------------|----------|-----------|----------|---------|
| AFIB         | 0.858632 | 0.879185  | 0.840274 | 204.0   |
| GSVT         | 0.883916 | 0.871462  | 0.897101 | 300.0   |
| SB           | 0.906883 | 0.897669  | 0.916329 | 892.0   |
| SR           | 0.885207 | 0.897989  | 0.872855 | 681.0   |
| macro avg    | 0.883659 | 0.886576  | 0.881640 | 2077.0  |
| micro avg    | 0.891828 | 0.891828  | 0.891828 | 2077.0  |
| weighted avg | 0.891719 | 0.892173  | 0.891828 | 2077.0  |

The result of Model Number:Dataset Number:Featuregroup Number:Rescale of 50 : 0 : 6 :  
1

|              | f1-score | precision | recall   | support |
|--------------|----------|-----------|----------|---------|
| AFIB         | 0.834828 | 0.865779  | 0.806132 | 204.0   |
| GSVT         | 0.859838 | 0.849087  | 0.870974 | 300.0   |
| SB           | 0.881642 | 0.873597  | 0.889844 | 892.0   |
| SR           | 0.858463 | 0.865125  | 0.851911 | 681.0   |
| macro avg    | 0.858693 | 0.863397  | 0.854715 | 2077.0  |
| micro avg    | 0.866459 | 0.866459  | 0.866459 | 2077.0  |
| weighted avg | 0.866295 | 0.866511  | 0.866459 | 2077.0  |

The result of Model Number:Dataset Number:Featuregroup Number:Rescale of 50 : 0 : 7 :  
0

|              | f1-score | precision | recall   | support |
|--------------|----------|-----------|----------|---------|
| AFIB         | 0.821480 | 0.811791  | 0.831445 | 875.0   |
| GSVT         | 0.835396 | 0.840682  | 0.830206 | 691.0   |
| SB           | 0.890693 | 0.889496  | 0.891898 | 1553.0  |
| SR           | 0.868812 | 0.877043  | 0.860763 | 907.0   |
| macro avg    | 0.854095 | 0.854753  | 0.853578 | 4026.0  |
| micro avg    | 0.861157 | 0.861157  | 0.861157 | 4026.0  |
| weighted avg | 0.861230 | 0.861424  | 0.861157 | 4026.0  |

The result of Model Number:Dataset Number:Featuregroup Number:Rescale of 50 : 0 : 7 :  
1

|              | f1-score | precision | recall   | support |
|--------------|----------|-----------|----------|---------|
| AFIB         | 0.828088 | 0.819969  | 0.885392 | 204.0   |
| GSVT         | 0.742508 | 0.734253  | 0.751137 | 300.0   |
| SB           | 0.954169 | 0.947221  | 0.961227 | 892.0   |
| SR           | 0.938167 | 0.944665  | 0.931834 | 681.0   |
| macro avg    | 0.865733 | 0.861527  | 0.882397 | 2077.0  |
| micro avg    | 0.913796 | 0.913796  | 0.913796 | 2077.0  |
| weighted avg | 0.905967 | 0.903123  | 0.913796 | 2077.0  |

The result of Model Number:Dataset Number:Featuregroup Number:Rescale of 50 : 0 : 8 :  
0



f1-score precision recall support  
AFIB 0.686306 0.681551 0.691265 875.0  
GSVT 0.696894 0.699722 0.694201 691.0  
SB 0.756131 0.748269 0.764164 1553.0  
SR 0.717953 0.734659 0.702056 907.0  
macro avg 0.714321 0.716050 0.712922 4026.0  
micro avg 0.722320 0.722320 0.722320 4026.0  
weighted avg 0.722187 0.722370 0.722320 4026.0  
The result of Model Number:Dataset Number:Featuregroup Number:Rescale of 50 : 0 : 8 :  
1

f1-score precision recall support  
AFIB 0.706486 0.698153 0.715049 875.0  
GSVT 0.720369 0.726634 0.714217 691.0  
SB 0.767735 0.764797 0.770699 1553.0  
SR 0.749621 0.758684 0.740780 907.0  
macro avg 0.736052 0.737067 0.735186 4026.0  
micro avg 0.742169 0.742169 0.742169 4026.0  
weighted avg 0.742213 0.742385 0.742169 4026.0  
The result of Model Number:Dataset Number:Featuregroup Number:Rescale of 50 : 0 : 9 :  
0

f1-score precision recall support  
AFIB 0.842146 0.829234 0.855607 875.0  
GSVT 0.871185 0.879724 0.862981 691.0  
SB 0.927173 0.925007 0.929379 1553.0  
SR 0.904012 0.915474 0.892853 907.0  
macro avg 0.886129 0.887360 0.885205 4026.0  
micro avg 0.893720 0.893720 0.893720 4026.0  
weighted avg 0.893866 0.894272 0.893720 4026.0  
The result of Model Number:Dataset Number:Featuregroup Number:Rescale of 50 : 0 : 9 :  
1

f1-score precision recall support  
AFIB 0.677636 0.728576 0.634060 204.0  
GSVT 0.646241 0.666753 0.627051 300.0  
SB 0.673291 0.639974 0.710273 892.0  
SR 0.596014 0.621632 0.572485 681.0  
macro avg 0.648295 0.664234 0.635967 2077.0  
micro avg 0.645589 0.645589 0.645589 2077.0  
weighted avg 0.644473 0.646531 0.645589 2077.0  
The result of Model Number:Dataset Number:Featuregroup Number:Rescale of 50 : 0 :  
10 : 0

f1-score precision recall support  
AFIB 0.841098 0.867004 0.816864 204.0  
GSVT 0.862556 0.851997 0.873474 300.0  
SB 0.885984 0.880720 0.891341 892.0

SR 0.871050 0.875346 0.866830 681.0  
macro avg 0.865172 0.868767 0.862127 2077.0  
micro avg 0.873409 0.873409 0.873409 2077.0  
weighted avg 0.873295 0.873462 0.873409 2077.0  
The result of Model Number:Dataset Number:Featuregroup Number:Rescale of 50 : 0 :  
10 : 1

f1-score precision recall support  
AFIB 0.885570 0.877652 0.893671 875.0  
GSVT 0.899789 0.903349 0.896289 691.0  
SB 0.959367 0.957587 0.961158 1553.0  
SR 0.935057 0.943700 0.926604 907.0  
macro avg 0.919946 0.920572 0.919430 4026.0  
micro avg 0.927572 0.927572 0.927572 4026.0  
weighted avg 0.927626 0.927776 0.927572 4026.0  
The result of Model Number:Dataset Number:Featuregroup Number:Rescale of 50 : 1 : 0 :  
0

f1-score precision recall support  
AFIB 0.868792 0.867822 0.869791 875.0  
GSVT 0.884684 0.873619 0.896058 691.0  
SB 0.929356 0.921884 0.936956 1553.0  
SR 0.887892 0.911188 0.865772 907.0  
macro avg 0.892681 0.893628 0.892144 4026.0  
micro avg 0.899302 0.899302 0.899302 4026.0  
weighted avg 0.899185 0.899441 0.899302 4026.0  
The result of Model Number:Dataset Number:Featuregroup Number:Rescale of 50 : 1 : 0 :  
1

f1-score precision recall support  
AFIB 0.870249 0.864220 0.876538 875.0  
GSVT 0.883675 0.887261 0.880261 691.0  
SB 0.958789 0.948819 0.968975 1553.0  
SR 0.910379 0.931562 0.890221 907.0  
macro avg 0.905773 0.907965 0.903999 4026.0  
micro avg 0.915916 0.915916 0.915916 4026.0  
weighted avg 0.915748 0.915979 0.915916 4026.0  
The result of Model Number:Dataset Number:Featuregroup Number:Rescale of 50 : 1 : 1 :  
0

f1-score precision recall support  
AFIB 0.719346 0.713844 0.725029 875.0  
GSVT 0.735898 0.739922 0.731960 691.0  
SB 0.779256 0.778710 0.779808 1553.0  
SR 0.758558 0.762237 0.754953 907.0  
macro avg 0.748264 0.748678 0.747938 4026.0  
micro avg 0.754091 0.754091 0.754091 4026.0  
weighted avg 0.754131 0.754244 0.754091 4026.0

The result of Model Number:Dataset Number:Featuregroup Number:Rescale of 50 : 1 : 1 : 1

|              | f1-score | precision | recall   | support |
|--------------|----------|-----------|----------|---------|
| AFIB         | 0.771052 | 0.760372  | 0.782067 | 875.0   |
| GSVT         | 0.788153 | 0.794532  | 0.781881 | 691.0   |
| SB           | 0.836615 | 0.834211  | 0.839039 | 1553.0  |
| SR           | 0.816263 | 0.826887  | 0.805917 | 907.0   |
| macro avg    | 0.803021 | 0.804001  | 0.802226 | 4026.0  |
| micro avg    | 0.809384 | 0.809384  | 0.809384 | 4026.0  |
| weighted avg | 0.809463 | 0.809703  | 0.809384 | 4026.0  |

The result of Model Number:Dataset Number:Featuregroup Number:Rescale of 50 : 1 : 2 : 0

|              | f1-score | precision | recall   | support |
|--------------|----------|-----------|----------|---------|
| AFIB         | 0.752133 | 0.753859  | 0.750497 | 875.0   |
| GSVT         | 0.754755 | 0.752627  | 0.756920 | 691.0   |
| SB           | 0.792104 | 0.785544  | 0.798784 | 1553.0  |
| SR           | 0.768341 | 0.779871  | 0.757178 | 907.0   |
| macro avg    | 0.766833 | 0.767975  | 0.765845 | 4026.0  |
| micro avg    | 0.771731 | 0.771731  | 0.771731 | 4026.0  |
| weighted avg | 0.771653 | 0.771730  | 0.771731 | 4026.0  |

The result of Model Number:Dataset Number:Featuregroup Number:Rescale of 50 : 1 : 2 : 1

|              | f1-score | precision | recall   | support |
|--------------|----------|-----------|----------|---------|
| AFIB         | 0.744663 | 0.755953  | 0.733724 | 204.0   |
| GSVT         | 0.756637 | 0.750258  | 0.763164 | 300.0   |
| SB           | 0.773420 | 0.770925  | 0.775933 | 892.0   |
| SR           | 0.765118 | 0.767960  | 0.762318 | 681.0   |
| macro avg    | 0.759959 | 0.761274  | 0.758785 | 2077.0  |
| micro avg    | 0.765479 | 0.765479  | 0.765479 | 2077.0  |
| weighted avg | 0.765449 | 0.765497  | 0.765479 | 2077.0  |

The result of Model Number:Dataset Number:Featuregroup Number:Rescale of 50 : 1 : 3 : 0

|              | f1-score | precision | recall   | support |
|--------------|----------|-----------|----------|---------|
| AFIB         | 0.809862 | 0.820680  | 0.799554 | 204.0   |
| GSVT         | 0.824169 | 0.819148  | 0.829378 | 300.0   |
| SB           | 0.844036 | 0.843287  | 0.844791 | 892.0   |
| SR           | 0.837799 | 0.837926  | 0.837677 | 681.0   |
| macro avg    | 0.828966 | 0.830260  | 0.827850 | 2077.0  |
| micro avg    | 0.835789 | 0.835789  | 0.835789 | 2077.0  |
| weighted avg | 0.835765 | 0.835822  | 0.835789 | 2077.0  |

The result of Model Number:Dataset Number:Featuregroup Number:Rescale of 50 : 1 : 3 : 1

|      | f1-score | precision | recall   | support |
|------|----------|-----------|----------|---------|
| AFIB | 0.826459 | 0.828056  | 0.824930 | 875.0   |

GSVT 0.800699 0.797182 0.804296 691.0  
SB 0.836635 0.785785 0.894546 1553.0  
SR 0.673374 0.780245 0.592413 907.0  
macro avg 0.784292 0.797817 0.779046 4026.0  
micro avg 0.795860 0.795860 0.795860 4026.0  
weighted avg 0.791475 0.795680 0.795860 4026.0  
The result of Model Number:Dataset Number:Featuregroup Number:Rescale of 50 : 1 : 4 :  
0

f1-score precision recall support

AFIB 0.703369 0.705431 0.701373 875.0  
GSVT 0.715007 0.705824 0.724525 691.0  
SB 0.756716 0.754877 0.758568 1553.0  
SR 0.737555 0.746308 0.729013 907.0  
macro avg 0.728162 0.728110 0.728369 4026.0  
micro avg 0.733636 0.733636 0.733636 4026.0  
weighted avg 0.733646 0.733781 0.733636 4026.0  
The result of Model Number:Dataset Number:Featuregroup Number:Rescale of 50 : 1 : 4 :  
1

f1-score precision recall support

AFIB 0.908721 0.913357 0.904162 875.0  
GSVT 0.921262 0.916469 0.926186 691.0  
SB 0.965626 0.964764 0.966498 1553.0  
SR 0.947846 0.948619 0.947113 907.0  
macro avg 0.935864 0.935802 0.935990 4026.0  
micro avg 0.941664 0.941664 0.941664 4026.0  
weighted avg 0.941639 0.941665 0.941664 4026.0  
The result of Model Number:Dataset Number:Featuregroup Number:Rescale of 50 : 1 : 5 :  
0

f1-score precision recall support

AFIB 0.790952 0.856980 0.735947 204.0  
GSVT 0.848387 0.837719 0.859676 300.0  
SB 0.870045 0.857856 0.882687 892.0  
SR 0.846312 0.850277 0.842797 681.0  
macro avg 0.838924 0.850708 0.830277 2077.0  
micro avg 0.851872 0.851872 0.851872 2077.0  
weighted avg 0.851367 0.852377 0.851872 2077.0  
The result of Model Number:Dataset Number:Featuregroup Number:Rescale of 50 : 1 : 5 :  
1

f1-score precision recall support

AFIB 0.662658 0.654842 0.670690 875.0  
GSVT 0.675680 0.681556 0.669909 691.0  
SB 0.720108 0.717352 0.722888 1553.0  
SR 0.703117 0.711618 0.694825 907.0  
macro avg 0.690391 0.691342 0.689578 4026.0

micro avg 0.696128 0.696128 0.696128 4026.0  
weighted avg 0.696169 0.696331 0.696128 4026.0  
The result of Model Number:Dataset Number:Featuregroup Number:Rescale of 50 : 1 : 6 :  
0

|              | f1-score | precision | recall   | support |
|--------------|----------|-----------|----------|---------|
| AFIB         | 0.740479 | 0.741964  | 0.739033 | 875.0   |
| GSVT         | 0.742313 | 0.738306  | 0.746384 | 691.0   |
| SB           | 0.775967 | 0.771821  | 0.780162 | 1553.0  |
| SR           | 0.757403 | 0.766385  | 0.748650 | 907.0   |
| macro avg    | 0.754040 | 0.754619  | 0.753557 | 4026.0  |
| micro avg    | 0.758327 | 0.758327  | 0.758327 | 4026.0  |
| weighted avg | 0.758296 | 0.758355  | 0.758327 | 4026.0  |

The result of Model Number:Dataset Number:Featuregroup Number:Rescale of 50 : 1 : 6 :  
1

|              | f1-score | precision | recall   | support |
|--------------|----------|-----------|----------|---------|
| AFIB         | 0.913605 | 0.926886  | 0.901114 | 204.0   |
| GSVT         | 0.933754 | 0.921121  | 0.946813 | 300.0   |
| SB           | 0.947808 | 0.937930  | 0.957903 | 892.0   |
| SR           | 0.929022 | 0.944395  | 0.914157 | 681.0   |
| macro avg    | 0.931047 | 0.932583  | 0.929997 | 2077.0  |
| micro avg    | 0.936380 | 0.936380  | 0.936380 | 2077.0  |
| weighted avg | 0.936259 | 0.936537  | 0.936380 | 2077.0  |

The result of Model Number:Dataset Number:Featuregroup Number:Rescale of 50 : 1 : 7 :  
0

|              | f1-score | precision | recall   | support |
|--------------|----------|-----------|----------|---------|
| AFIB         | 0.644219 | 0.630380  | 0.658714 | 875.0   |
| GSVT         | 0.667157 | 0.676832  | 0.657798 | 691.0   |
| SB           | 0.710214 | 0.710079  | 0.710352 | 1553.0  |
| SR           | 0.692414 | 0.700462  | 0.684553 | 907.0   |
| macro avg    | 0.678501 | 0.679438  | 0.677854 | 4026.0  |
| micro avg    | 0.684297 | 0.684297  | 0.684297 | 4026.0  |
| weighted avg | 0.684471 | 0.684885  | 0.684297 | 4026.0  |

The result of Model Number:Dataset Number:Featuregroup Number:Rescale of 50 : 1 : 7 :  
1

|              | f1-score | precision | recall   | support |
|--------------|----------|-----------|----------|---------|
| AFIB         | 0.882909 | 0.882678  | 0.883225 | 875.0   |
| GSVT         | 0.901353 | 0.897945  | 0.904884 | 691.0   |
| SB           | 0.959626 | 0.955293  | 0.964013 | 1553.0  |
| SR           | 0.927285 | 0.937879  | 0.916963 | 907.0   |
| macro avg    | 0.917793 | 0.918449  | 0.917271 | 4026.0  |
| micro avg    | 0.925706 | 0.925706  | 0.925706 | 4026.0  |
| weighted avg | 0.925665 | 0.925745  | 0.925706 | 4026.0  |

The result of Model Number:Dataset Number:Featuregroup Number:Rescale of 50 : 1 : 8 :  
0

f1-score precision recall support  
AFIB 0.657975 0.659725 0.656274 875.0  
GSVT 0.670628 0.665903 0.675459 691.0  
SB 0.708933 0.701704 0.716325 1553.0  
SR 0.676526 0.691262 0.662430 907.0  
macro avg 0.678515 0.679649 0.677622 4026.0  
micro avg 0.684118 0.684118 0.684118 4026.0  
weighted avg 0.683982 0.684083 0.684118 4026.0  
The result of Model Number:Dataset Number:Featuregroup Number:Rescale of 50 : 1 : 8 :  
1

f1-score precision recall support  
AFIB 0.760922 0.765897 0.756057 204.0  
GSVT 0.779986 0.778190 0.781801 300.0  
SB 0.793909 0.792763 0.795064 892.0  
SR 0.787652 0.788475 0.786845 681.0  
macro avg 0.780617 0.781331 0.779942 2077.0  
micro avg 0.786622 0.786622 0.786622 2077.0  
weighted avg 0.786607 0.786614 0.786622 2077.0  
The result of Model Number:Dataset Number:Featuregroup Number:Rescale of 50 : 1 : 9 :  
0

f1-score precision recall support  
AFIB 0.772498 0.825244 0.726420 204.0  
GSVT 0.816608 0.799967 0.834027 300.0  
SB 0.836862 0.829526 0.844361 892.0  
SR 0.816220 0.818938 0.813592 681.0  
macro avg 0.810547 0.818419 0.804600 2077.0  
micro avg 0.821196 0.821196 0.821196 2077.0  
weighted avg 0.820847 0.821364 0.821196 2077.0  
The result of Model Number:Dataset Number:Featuregroup Number:Rescale of 50 : 1 : 9 :  
1

f1-score precision recall support  
AFIB 0.913407 0.954653 0.875876 204.0  
GSVT 0.945176 0.934561 0.956207 300.0  
SB 0.909224 0.869584 0.972883 892.0  
SR 0.757509 0.763968 0.751287 681.0  
macro avg 0.881329 0.880691 0.889063 2077.0  
micro avg 0.888290 0.888290 0.888290 2077.0  
weighted avg 0.865084 0.852695 0.888290 2077.0  
The result of Model Number:Dataset Number:Featuregroup Number:Rescale of 50 : 1 :  
10 : 0

f1-score precision recall support  
AFIB 0.678075 0.687132 0.669444 204.0  
GSVT 0.690054 0.685850 0.694415 300.0  
SB 0.706688 0.706061 0.707320 892.0

SR 0.701466 0.701572 0.701364 681.0  
macro avg 0.694071 0.695154 0.693136 2077.0  
micro avg 0.699783 0.699783 0.699783 2077.0  
weighted avg 0.699763 0.699811 0.699783 2077.0  
The result of Model Number:Dataset Number:Featuregroup Number:Rescale of 50 : 1 :  
10 : 1

f1-score precision recall support  
AFIB 0.691454 0.710143 0.673867 204.0  
GSVT 0.697153 0.686890 0.707823 300.0  
SB 0.710657 0.703097 0.718384 892.0  
SR 0.697477 0.707060 0.688161 681.0  
macro avg 0.699185 0.701798 0.697059 2077.0  
micro avg 0.702577 0.702577 0.702577 2077.0  
weighted avg 0.702499 0.702748 0.702577 2077.0

The result of Model Number:Dataset Number:Featuregroup Number:Rescale of 51 : 0 : 0 :  
0

f1-score precision recall support  
AFIB 0.873310 0.870482 0.876183 875.0  
GSVT 0.883437 0.886182 0.880796 691.0  
SB 0.932169 0.930140 0.934210 1553.0  
SR 0.914979 0.919295 0.910737 907.0  
macro avg 0.900974 0.901525 0.900481 4026.0  
micro avg 0.907143 0.907143 0.907143 4026.0  
weighted avg 0.907140 0.907186 0.907143 4026.0

The result of Model Number:Dataset Number:Featuregroup Number:Rescale of 51 : 0 : 0 :  
1

f1-score precision recall support  
AFIB 0.851333 0.856006 0.846766 875.0  
GSVT 0.852524 0.841746 0.863715 691.0  
SB 0.896576 0.892979 0.900211 1553.0  
SR 0.877330 0.887980 0.866986 907.0  
macro avg 0.869441 0.869678 0.869420 4026.0  
micro avg 0.874847 0.874847 0.874847 4026.0  
weighted avg 0.874846 0.875024 0.874847 4026.0

The result of Model Number:Dataset Number:Featuregroup Number:Rescale of 51 : 0 : 1 :  
0

f1-score precision recall support  
AFIB 0.817303 0.834479 0.800851 875.0  
GSVT 0.870332 0.873322 0.867405 691.0  
SB 0.948239 0.943770 0.952755 1553.0  
SR 0.897614 0.885660 0.909971 907.0  
macro avg 0.883372 0.884308 0.882745 4026.0  
micro avg 0.895453 0.895453 0.895453 4026.0  
weighted avg 0.895005 0.894834 0.895453 4026.0

The result of Model Number:Dataset Number:Featuregroup Number:Rescale of 51 : 0 : 1 : 1

|              | f1-score | precision | recall   | support |
|--------------|----------|-----------|----------|---------|
| AFIB         | 0.673277 | 0.685629  | 0.661415 | 204.0   |
| GSVT         | 0.682157 | 0.675273  | 0.689197 | 300.0   |
| SB           | 0.698960 | 0.695322  | 0.702641 | 892.0   |
| SR           | 0.689445 | 0.693765  | 0.685193 | 681.0   |
| macro avg    | 0.685960 | 0.687497  | 0.684612 | 2077.0  |
| micro avg    | 0.690929 | 0.690929  | 0.690929 | 2077.0  |
| weighted avg | 0.690891 | 0.690964  | 0.690929 | 2077.0  |

The result of Model Number:Dataset Number:Featuregroup Number:Rescale of 51 : 0 : 2 : 0

|              | f1-score | precision | recall   | support |
|--------------|----------|-----------|----------|---------|
| AFIB         | 0.899701 | 0.936015  | 0.866171 | 204.0   |
| GSVT         | 0.933182 | 0.918023  | 0.949011 | 300.0   |
| SB           | 0.957324 | 0.949627  | 0.965158 | 892.0   |
| SR           | 0.931568 | 0.938276  | 0.925004 | 681.0   |
| macro avg    | 0.930444 | 0.935485  | 0.926336 | 2077.0  |
| micro avg    | 0.939938 | 0.939938  | 0.939938 | 2077.0  |
| weighted avg | 0.939732 | 0.940004  | 0.939938 | 2077.0  |

The result of Model Number:Dataset Number:Featuregroup Number:Rescale of 51 : 0 : 2 : 1

|              | f1-score | precision | recall   | support |
|--------------|----------|-----------|----------|---------|
| AFIB         | 0.741531 | 0.797275  | 0.693846 | 204.0   |
| GSVT         | 0.707176 | 0.729623  | 0.686177 | 300.0   |
| SB           | 0.736777 | 0.700319  | 0.777246 | 892.0   |
| SR           | 0.652213 | 0.680247  | 0.626465 | 681.0   |
| macro avg    | 0.709424 | 0.726866  | 0.695933 | 2077.0  |
| micro avg    | 0.706463 | 0.706463  | 0.706463 | 2077.0  |
| weighted avg | 0.705242 | 0.707493  | 0.706463 | 2077.0  |

The result of Model Number:Dataset Number:Featuregroup Number:Rescale of 51 : 0 : 3 : 0

|              | f1-score | precision | recall   | support |
|--------------|----------|-----------|----------|---------|
| AFIB         | 0.654224 | 0.660111  | 0.648647 | 875.0   |
| GSVT         | 0.667551 | 0.654015  | 0.681816 | 691.0   |
| SB           | 0.707942 | 0.700066  | 0.716082 | 1553.0  |
| SR           | 0.679850 | 0.700059  | 0.660935 | 907.0   |
| macro avg    | 0.677392 | 0.678563  | 0.676870 | 4026.0  |
| micro avg    | 0.683121 | 0.683121  | 0.683121 | 4026.0  |
| weighted avg | 0.683006 | 0.683477  | 0.683121 | 4026.0  |

The result of Model Number:Dataset Number:Featuregroup Number:Rescale of 51 : 0 : 3 : 1

|      | f1-score | precision | recall   | support |
|------|----------|-----------|----------|---------|
| AFIB | 0.738342 | 0.742001  | 0.734797 | 875.0   |



GSVT 0.745693 0.746767 0.744735 691.0  
SB 0.784942 0.781301 0.788627 1553.0  
SR 0.770493 0.772422 0.768615 907.0  
macro avg 0.759867 0.760623 0.759194 4026.0  
micro avg 0.764886 0.764886 0.764886 4026.0  
weighted avg 0.764822 0.764832 0.764886 4026.0  
The result of Model Number:Dataset Number:Featuregroup Number:Rescale of 51 : 0 : 4 :  
0

f1-score precision recall support  
AFIB 0.887658 0.898038 0.877681 204.0  
GSVT 0.800672 0.770103 0.913555 300.0  
SB 0.742860 0.741109 0.744626 892.0  
SR 0.922381 0.924154 0.920622 681.0  
macro avg 0.838393 0.833351 0.864121 2077.0  
micro avg 0.839799 0.839799 0.839799 2077.0  
weighted avg 0.824293 0.820726 0.839799 2077.0  
The result of Model Number:Dataset Number:Featuregroup Number:Rescale of 51 : 0 : 4 :  
1

f1-score precision recall support  
AFIB 0.760251 0.758777 0.761829 875.0  
GSVT 0.774527 0.760975 0.788644 691.0  
SB 0.829737 0.817965 0.841862 1553.0  
SR 0.785980 0.821018 0.753844 907.0  
macro avg 0.787624 0.789684 0.786545 4026.0  
micro avg 0.795505 0.795505 0.795505 4026.0  
weighted avg 0.795301 0.796007 0.795505 4026.0  
The result of Model Number:Dataset Number:Featuregroup Number:Rescale of 51 : 0 : 5 :  
0

f1-score precision recall support  
AFIB 0.628649 0.640713 0.617066 875.0  
GSVT 0.670120 0.671142 0.669142 691.0  
SB 0.729674 0.726468 0.732915 1553.0  
SR 0.689520 0.682024 0.697253 907.0  
macro avg 0.679491 0.680087 0.679094 4026.0  
micro avg 0.688757 0.688757 0.688757 4026.0  
weighted avg 0.688450 0.688322 0.688757 4026.0  
The result of Model Number:Dataset Number:Featuregroup Number:Rescale of 51 : 0 : 5 :  
1

f1-score precision recall support  
AFIB 0.852352 0.860218 0.844675 875.0  
GSVT 0.872255 0.869900 0.874653 691.0  
SB 0.928964 0.920232 0.937872 1553.0  
SR 0.903297 0.912361 0.894430 907.0  
macro avg 0.889217 0.890678 0.887908 4026.0

micro avg 0.896979 0.896979 0.896979 4026.0  
weighted avg 0.896798 0.896777 0.896979 4026.0  
The result of Model Number:Dataset Number:Featuregroup Number:Rescale of 51 : 0 : 6 :  
0

|              | f1-score | precision | recall   | support |
|--------------|----------|-----------|----------|---------|
| AFIB         | 0.683773 | 0.687261  | 0.680342 | 875.0   |
| GSVT         | 0.693209 | 0.689602  | 0.696914 | 691.0   |
| SB           | 0.726591 | 0.725942  | 0.727247 | 1553.0  |
| SR           | 0.713212 | 0.713794  | 0.712661 | 907.0   |
| macro avg    | 0.704196 | 0.704150  | 0.704291 | 4026.0  |
| micro avg    | 0.708560 | 0.708560  | 0.708560 | 4026.0  |
| weighted avg | 0.708541 | 0.708561  | 0.708560 | 4026.0  |

The result of Model Number:Dataset Number:Featuregroup Number:Rescale of 51 : 0 : 6 :  
1

|              | f1-score | precision | recall   | support |
|--------------|----------|-----------|----------|---------|
| AFIB         | 0.795495 | 0.780624  | 0.811028 | 875.0   |
| GSVT         | 0.823360 | 0.836358  | 0.810862 | 691.0   |
| SB           | 0.875608 | 0.874043  | 0.877186 | 1553.0  |
| SR           | 0.853352 | 0.862392  | 0.844504 | 907.0   |
| macro avg    | 0.836954 | 0.838355  | 0.835895 | 4026.0  |
| micro avg    | 0.844061 | 0.844061  | 0.844061 | 4026.0  |
| weighted avg | 0.844215 | 0.844647  | 0.844061 | 4026.0  |

The result of Model Number:Dataset Number:Featuregroup Number:Rescale of 51 : 0 : 7 :  
0

|              | f1-score | precision | recall   | support |
|--------------|----------|-----------|----------|---------|
| AFIB         | 0.837239 | 0.826257  | 0.848555 | 875.0   |
| GSVT         | 0.850057 | 0.859505  | 0.840828 | 691.0   |
| SB           | 0.901595 | 0.899467  | 0.903738 | 1553.0  |
| SR           | 0.879021 | 0.886933  | 0.871263 | 907.0   |
| macro avg    | 0.866978 | 0.868040  | 0.866096 | 4026.0  |
| micro avg    | 0.873631 | 0.873631  | 0.873631 | 4026.0  |
| weighted avg | 0.873677 | 0.873873  | 0.873631 | 4026.0  |

The result of Model Number:Dataset Number:Featuregroup Number:Rescale of 51 : 0 : 7 :  
1

|              | f1-score | precision | recall   | support |
|--------------|----------|-----------|----------|---------|
| AFIB         | 0.899679 | 0.900896  | 0.898637 | 875.0   |
| GSVT         | 0.913692 | 0.913222  | 0.914196 | 691.0   |
| SB           | 0.954257 | 0.950842  | 0.957699 | 1553.0  |
| SR           | 0.931405 | 0.936626  | 0.926302 | 907.0   |
| macro avg    | 0.924758 | 0.925396  | 0.924208 | 4026.0  |
| micro avg    | 0.930323 | 0.930323  | 0.930323 | 4026.0  |
| weighted avg | 0.930284 | 0.930327  | 0.930323 | 4026.0  |

The result of Model Number:Dataset Number:Featuregroup Number:Rescale of 51 : 0 : 8 :  
0

f1-score precision recall support  
AFIB 0.853836 0.868031 0.840294 204.0  
GSVT 0.870209 0.864026 0.876545 300.0  
SB 0.890393 0.885389 0.895474 892.0  
SR 0.879049 0.884427 0.873764 681.0  
macro avg 0.873372 0.875468 0.871519 2077.0  
micro avg 0.880202 0.880202 0.880202 2077.0  
weighted avg 0.880168 0.880283 0.880202 2077.0  
The result of Model Number:Dataset Number:Featuregroup Number:Rescale of 51 : 0 : 8 :  
1

f1-score precision recall support  
AFIB 0.687837 0.691445 0.684308 875.0  
GSVT 0.702220 0.700958 0.703536 691.0  
SB 0.762490 0.756643 0.768431 1553.0  
SR 0.735589 0.742952 0.728375 907.0  
macro avg 0.722034 0.723000 0.721162 4026.0  
micro avg 0.729986 0.729986 0.729986 4026.0  
weighted avg 0.729860 0.729831 0.729986 4026.0  
The result of Model Number:Dataset Number:Featuregroup Number:Rescale of 51 : 0 : 9 :  
0

f1-score precision recall support  
AFIB 0.801338 0.780287 0.851504 875.0  
GSVT 0.770880 0.729647 0.878787 691.0  
SB 0.730448 0.725832 0.735146 1553.0  
SR 0.709515 0.721740 0.697895 907.0  
macro avg 0.753045 0.739377 0.790833 4026.0  
micro avg 0.776696 0.776696 0.776696 4026.0  
weighted avg 0.748079 0.737400 0.776696 4026.0  
The result of Model Number:Dataset Number:Featuregroup Number:Rescale of 51 : 0 : 9 :  
1

f1-score precision recall support  
AFIB 0.790098 0.797208 0.783363 875.0  
GSVT 0.806193 0.789846 0.823421 691.0  
SB 0.854973 0.845461 0.864803 1553.0  
SR 0.821046 0.845452 0.798203 907.0  
macro avg 0.818078 0.819492 0.817447 4026.0  
micro avg 0.824997 0.824997 0.824997 4026.0  
weighted avg 0.824858 0.825427 0.824997 4026.0  
The result of Model Number:Dataset Number:Featuregroup Number:Rescale of 51 : 0 :  
10 : 0

f1-score precision recall support  
AFIB 0.706836 0.688267 0.751086 875.0  
GSVT 0.679970 0.643600 0.775151 691.0  
SB 0.644306 0.640235 0.648450 1553.0

SR 0.625842 0.636625 0.615592 907.0  
macro avg 0.664238 0.652182 0.697570 4026.0  
micro avg 0.685100 0.685100 0.685100 4026.0  
weighted avg 0.659858 0.650438 0.685100 4026.0  
The result of Model Number:Dataset Number:Featuregroup Number:Rescale of 51 : 0 :

10 : 1

f1-score precision recall support

AFIB 0.722472 0.726157 0.718847 875.0  
GSVT 0.732442 0.728631 0.736356 691.0  
SB 0.767714 0.767028 0.768406 1553.0  
SR 0.753577 0.754192 0.752995 907.0  
macro avg 0.744051 0.744002 0.744151 4026.0  
micro avg 0.748662 0.748662 0.748662 4026.0  
weighted avg 0.748642 0.748663 0.748662 4026.0

The result of Model Number:Dataset Number:Featuregroup Number:Rescale of 51 : 1 : 0 :  
0

f1-score precision recall support

AFIB 0.702392 0.732495 0.674932 204.0  
GSVT 0.725995 0.715026 0.737352 300.0  
SB 0.740395 0.733072 0.747866 892.0  
SR 0.720335 0.726498 0.714303 681.0  
macro avg 0.722279 0.726773 0.718613 2077.0  
micro avg 0.728180 0.728180 0.728180 2077.0  
weighted avg 0.728005 0.728253 0.728180 2077.0

The result of Model Number:Dataset Number:Featuregroup Number:Rescale of 51 : 1 : 0 :  
1

f1-score precision recall support

AFIB 0.785854 0.773529 0.798664 875.0  
GSVT 0.757222 0.778931 0.736779 691.0  
SB 0.795715 0.755380 0.840647 1553.0  
SR 0.646514 0.719438 0.587113 907.0  
macro avg 0.746326 0.756819 0.740801 4026.0  
micro avg 0.756578 0.756578 0.756578 4026.0  
weighted avg 0.753352 0.755269 0.756578 4026.0

The result of Model Number:Dataset Number:Featuregroup Number:Rescale of 51 : 1 : 1 :  
0

f1-score precision recall support

AFIB 0.871619 0.890855 0.853261 204.0  
GSVT 0.890668 0.875898 0.906051 300.0  
SB 0.907782 0.900682 0.915005 892.0  
SR 0.885752 0.896412 0.875343 681.0  
macro avg 0.888955 0.890962 0.887415 2077.0  
micro avg 0.894643 0.894643 0.894643 2077.0  
weighted avg 0.894535 0.894737 0.894643 2077.0

The result of Model Number:Dataset Number:Featuregroup Number:Rescale of 51 : 1 : 1 : 1

|              | f1-score | precision | recall   | support |
|--------------|----------|-----------|----------|---------|
| AFIB         | 0.842803 | 0.851042  | 0.834919 | 875.0   |
| GSVT         | 0.836366 | 0.830020  | 0.843084 | 691.0   |
| SB           | 0.884970 | 0.875865  | 0.894345 | 1553.0  |
| SR           | 0.856880 | 0.870660  | 0.843770 | 907.0   |
| macro avg    | 0.855255 | 0.856897  | 0.854030 | 4026.0  |
| micro avg    | 0.861238 | 0.861238  | 0.861238 | 4026.0  |
| weighted avg | 0.861135 | 0.861429  | 0.861238 | 4026.0  |

The result of Model Number:Dataset Number:Featuregroup Number:Rescale of 51 : 1 : 2 : 0

|              | f1-score | precision | recall   | support |
|--------------|----------|-----------|----------|---------|
| AFIB         | 0.740615 | 0.782747  | 0.703279 | 204.0   |
| GSVT         | 0.782663 | 0.774044  | 0.791515 | 300.0   |
| SB           | 0.794306 | 0.786402  | 0.802397 | 892.0   |
| SR           | 0.785078 | 0.787762  | 0.782536 | 681.0   |
| macro avg    | 0.775665 | 0.782739  | 0.769932 | 2077.0  |
| micro avg    | 0.784578 | 0.784578  | 0.784578 | 2077.0  |
| weighted avg | 0.784325 | 0.784704  | 0.784578 | 2077.0  |

The result of Model Number:Dataset Number:Featuregroup Number:Rescale of 51 : 1 : 2 : 1

|              | f1-score | precision | recall   | support |
|--------------|----------|-----------|----------|---------|
| AFIB         | 0.886318 | 0.884079  | 0.888706 | 875.0   |
| GSVT         | 0.903609 | 0.898641  | 0.908681 | 691.0   |
| SB           | 0.946150 | 0.940446  | 0.951937 | 1553.0  |
| SR           | 0.918254 | 0.934827  | 0.902275 | 907.0   |
| macro avg    | 0.913583 | 0.914498  | 0.912900 | 4026.0  |
| micro avg    | 0.919582 | 0.919582  | 0.919582 | 4026.0  |
| weighted avg | 0.919560 | 0.919754  | 0.919582 | 4026.0  |

The result of Model Number:Dataset Number:Featuregroup Number:Rescale of 51 : 1 : 3 : 0

|              | f1-score | precision | recall   | support |
|--------------|----------|-----------|----------|---------|
| AFIB         | 0.809897 | 0.817372  | 0.802603 | 875.0   |
| GSVT         | 0.828809 | 0.826571  | 0.831087 | 691.0   |
| SB           | 0.882693 | 0.874396  | 0.891158 | 1553.0  |
| SR           | 0.858305 | 0.866917  | 0.849879 | 907.0   |
| macro avg    | 0.844926 | 0.846314  | 0.843682 | 4026.0  |
| micro avg    | 0.852302 | 0.852302  | 0.852302 | 4026.0  |
| weighted avg | 0.852129 | 0.852109  | 0.852302 | 4026.0  |

The result of Model Number:Dataset Number:Featuregroup Number:Rescale of 51 : 1 : 3 : 1

|      | f1-score | precision | recall   | support |
|------|----------|-----------|----------|---------|
| AFIB | 0.701454 | 0.714916  | 0.688530 | 875.0   |

GSVT 0.747728 0.748868 0.746637 691.0  
SB 0.814180 0.810601 0.817795 1553.0  
SR 0.769374 0.761011 0.778003 907.0  
macro avg 0.758184 0.758849 0.757741 4026.0  
micro avg 0.768523 0.768523 0.768523 4026.0  
weighted avg 0.768181 0.768038 0.768523 4026.0  
The result of Model Number:Dataset Number:Featuregroup Number:Rescale of 51 : 1 : 4 :  
0

f1-score precision recall support  
AFIB 0.785494 0.795676 0.775777 204.0  
GSVT 0.815887 0.815360 0.816440 300.0  
SB 0.833079 0.831320 0.834851 892.0  
SR 0.824700 0.824232 0.825187 681.0  
macro avg 0.814790 0.816647 0.813064 2077.0  
micro avg 0.823221 0.823221 0.823221 2077.0  
weighted avg 0.823175 0.823190 0.823221 2077.0  
The result of Model Number:Dataset Number:Featuregroup Number:Rescale of 51 : 1 : 4 :  
1

f1-score precision recall support  
AFIB 0.702308 0.715917 0.689522 204.0  
GSVT 0.729542 0.723442 0.735880 300.0  
SB 0.743154 0.741663 0.744654 892.0  
SR 0.736068 0.736831 0.735311 681.0  
macro avg 0.727768 0.729463 0.726342 2077.0  
micro avg 0.734908 0.734908 0.734908 2077.0  
weighted avg 0.734853 0.734918 0.734908 2077.0  
The result of Model Number:Dataset Number:Featuregroup Number:Rescale of 51 : 1 : 5 :  
0

f1-score precision recall support  
AFIB 0.676605 0.742936 0.621809 204.0  
GSVT 0.793837 0.783137 0.804961 300.0  
SB 0.842807 0.839995 0.845641 892.0  
SR 0.820903 0.809897 0.832234 681.0  
macro avg 0.783538 0.793992 0.776161 2077.0  
micro avg 0.813385 0.813385 0.813385 2077.0  
weighted avg 0.812228 0.812381 0.813385 2077.0  
The result of Model Number:Dataset Number:Featuregroup Number:Rescale of 51 : 1 : 5 :  
1

f1-score precision recall support  
AFIB 0.893448 0.894245 0.892744 875.0  
GSVT 0.909814 0.912201 0.907592 691.0  
SB 0.965780 0.959349 0.972306 1553.0  
SR 0.946962 0.955608 0.938506 907.0  
macro avg 0.929001 0.930351 0.927787 4026.0

micro avg 0.936293 0.936293 0.936293 4026.0  
weighted avg 0.936214 0.936265 0.936293 4026.0  
The result of Model Number:Dataset Number:Featuregroup Number:Rescale of 51 : 1 : 6 :  
0

|              | f1-score | precision | recall   | support |
|--------------|----------|-----------|----------|---------|
| AFIB         | 0.823955 | 0.832737  | 0.815490 | 204.0   |
| GSVT         | 0.839108 | 0.834505  | 0.843855 | 300.0   |
| SB           | 0.858477 | 0.857046  | 0.859918 | 892.0   |
| SR           | 0.851321 | 0.852707  | 0.849949 | 681.0   |
| macro avg    | 0.843215 | 0.844249  | 0.842303 | 2077.0  |
| micro avg    | 0.849966 | 0.849966  | 0.849966 | 2077.0  |
| weighted avg | 0.849942 | 0.849980  | 0.849966 | 2077.0  |

The result of Model Number:Dataset Number:Featuregroup Number:Rescale of 51 : 1 : 6 :  
1

|              | f1-score | precision | recall   | support |
|--------------|----------|-----------|----------|---------|
| AFIB         | 0.708537 | 0.717722  | 0.699773 | 204.0   |
| GSVT         | 0.735953 | 0.735477  | 0.736451 | 300.0   |
| SB           | 0.751460 | 0.749873  | 0.753059 | 892.0   |
| SR           | 0.743902 | 0.743480  | 0.744341 | 681.0   |
| macro avg    | 0.734963 | 0.736638  | 0.733406 | 2077.0  |
| micro avg    | 0.742568 | 0.742568  | 0.742568 | 2077.0  |
| weighted avg | 0.742526 | 0.742540  | 0.742568 | 2077.0  |

The result of Model Number:Dataset Number:Featuregroup Number:Rescale of 51 : 1 : 7 :  
0

|              | f1-score | precision | recall   | support |
|--------------|----------|-----------|----------|---------|
| AFIB         | 0.840891 | 0.870083  | 0.813707 | 204.0   |
| GSVT         | 0.857014 | 0.847632  | 0.866711 | 300.0   |
| SB           | 0.879829 | 0.873511  | 0.886240 | 892.0   |
| SR           | 0.864116 | 0.868365  | 0.859923 | 681.0   |
| macro avg    | 0.860462 | 0.864898  | 0.856646 | 2077.0  |
| micro avg    | 0.867667 | 0.867667  | 0.867667 | 2077.0  |
| weighted avg | 0.867557 | 0.867749  | 0.867667 | 2077.0  |

The result of Model Number:Dataset Number:Featuregroup Number:Rescale of 51 : 1 : 7 :  
1

|              | f1-score | precision | recall   | support |
|--------------|----------|-----------|----------|---------|
| AFIB         | 0.831508 | 0.828950  | 0.834134 | 875.0   |
| GSVT         | 0.810311 | 0.814285  | 0.806505 | 691.0   |
| SB           | 0.851864 | 0.816514  | 0.890423 | 1553.0  |
| SR           | 0.733100 | 0.799853  | 0.676688 | 907.0   |
| macro avg    | 0.806696 | 0.814901  | 0.801937 | 4026.0  |
| micro avg    | 0.815635 | 0.815635  | 0.815635 | 4026.0  |
| weighted avg | 0.813552 | 0.815081  | 0.815635 | 4026.0  |

The result of Model Number:Dataset Number:Featuregroup Number:Rescale of 51 : 1 : 8 :  
0

f1-score precision recall support  
AFIB 0.743649 0.736677 0.750849 875.0  
GSVT 0.705051 0.688104 0.756880 691.0  
SB 0.815260 0.812265 0.818298 1553.0  
SR 0.634094 0.638541 0.629717 907.0  
macro avg 0.724513 0.718897 0.738936 4026.0  
micro avg 0.750613 0.750613 0.750613 4026.0  
weighted avg 0.739966 0.735389 0.750613 4026.0  
The result of Model Number:Dataset Number:Featuregroup Number:Rescale of 51 : 1 : 8 :  
1

f1-score precision recall support  
AFIB 0.743065 0.759594 0.727400 204.0  
GSVT 0.774724 0.769910 0.779629 300.0  
SB 0.791541 0.789874 0.793225 892.0  
SR 0.783111 0.782557 0.783690 681.0  
macro avg 0.773110 0.775484 0.770986 2077.0  
micro avg 0.781670 0.781670 0.781670 2077.0  
weighted avg 0.781587 0.781617 0.781670 2077.0  
The result of Model Number:Dataset Number:Featuregroup Number:Rescale of 51 : 1 : 9 :  
0

f1-score precision recall support  
AFIB 0.694594 0.707359 0.682367 204.0  
GSVT 0.706262 0.701636 0.710967 300.0  
SB 0.718343 0.714835 0.721886 892.0  
SR 0.710918 0.713874 0.707997 681.0  
macro avg 0.707529 0.709426 0.705804 2077.0  
micro avg 0.711873 0.711873 0.711873 2077.0  
weighted avg 0.711831 0.711879 0.711873 2077.0  
The result of Model Number:Dataset Number:Featuregroup Number:Rescale of 51 : 1 : 9 :  
1

f1-score precision recall support  
AFIB 0.901414 0.917958 0.885891 204.0  
GSVT 0.935633 0.928110 0.943450 300.0  
SB 0.952990 0.951288 0.954699 892.0  
SR 0.943554 0.944394 0.942720 681.0  
macro avg 0.933398 0.935438 0.931690 2077.0  
micro avg 0.942389 0.942389 0.942389 2077.0  
weighted avg 0.942323 0.942406 0.942389 2077.0  
The result of Model Number:Dataset Number:Featuregroup Number:Rescale of 51 : 1 :  
10 : 0

f1-score precision recall support  
AFIB 0.642446 0.626006 0.659833 875.0  
GSVT 0.607310 0.641731 0.576535 691.0  
SB 0.643961 0.592599 0.705088 1553.0



SR 0.514416 0.624826 0.437260 907.0  
macro avg 0.602033 0.621291 0.594679 4026.0  
micro avg 0.612850 0.612850 0.612850 4026.0  
weighted avg 0.608157 0.615553 0.612850 4026.0  
The result of Model Number:Dataset Number:Featuregroup Number:Rescale of 51 : 1 :  
10 : 1

f1-score precision recall support  
AFIB 0.896213 0.903097 0.889636 204.0  
GSVT 0.927773 0.926884 0.928694 300.0  
SB 0.946754 0.944549 0.948979 892.0  
SR 0.938041 0.939306 0.936801 681.0  
macro avg 0.927195 0.928459 0.926028 2077.0  
micro avg 0.936228 0.936228 0.936228 2077.0  
weighted avg 0.936192 0.936207 0.936228 2077.0

The result of Model Number:Dataset Number:Featuregroup Number:Rescale of 52 : 0 : 0 :  
0

f1-score precision recall support  
AFIB 0.771169 0.800535 0.744050 204.0  
GSVT 0.795739 0.787718 0.803959 300.0  
SB 0.811666 0.807625 0.815759 892.0  
SR 0.801862 0.802366 0.801384 681.0  
macro avg 0.795109 0.799561 0.791288 2077.0  
micro avg 0.802298 0.802298 0.802298 2077.0  
weighted avg 0.802173 0.802329 0.802298 2077.0

The result of Model Number:Dataset Number:Featuregroup Number:Rescale of 52 : 0 : 0 :  
1

f1-score precision recall support  
AFIB 0.756818 0.752053 0.852504 204.0  
GSVT 0.922574 0.917829 0.927524 300.0  
SB 0.948843 0.944328 0.953411 892.0  
SR 0.744260 0.746712 0.742273 681.0  
macro avg 0.843124 0.840230 0.868928 2077.0  
micro avg 0.870534 0.870534 0.870534 2077.0  
weighted avg 0.859110 0.856822 0.870534 2077.0

The result of Model Number:Dataset Number:Featuregroup Number:Rescale of 52 : 0 : 1 :  
0

f1-score precision recall support  
AFIB 0.649307 0.634552 0.664810 875.0  
GSVT 0.671559 0.682450 0.661066 691.0  
SB 0.716480 0.716485 0.716481 1553.0  
SR 0.698143 0.706096 0.690368 907.0  
macro avg 0.683872 0.684896 0.683181 4026.0  
micro avg 0.689857 0.689857 0.689857 4026.0  
weighted avg 0.690040 0.690496 0.689857 4026.0

The result of Model Number:Dataset Number:Featuregroup Number:Rescale of 52 : 0 : 1 :  
1

|              | f1-score | precision | recall   | support |
|--------------|----------|-----------|----------|---------|
| AFIB         | 0.803475 | 0.822709  | 0.786297 | 204.0   |
| GSVT         | 0.827136 | 0.815481  | 0.839474 | 300.0   |
| SB           | 0.848627 | 0.840005  | 0.857466 | 892.0   |
| SR           | 0.828344 | 0.840304  | 0.816785 | 681.0   |
| macro avg    | 0.826895 | 0.829625  | 0.825005 | 2077.0  |
| micro avg    | 0.834539 | 0.834539  | 0.834539 | 2077.0  |
| weighted avg | 0.834438 | 0.834862  | 0.834539 | 2077.0  |

The result of Model Number:Dataset Number:Featuregroup Number:Rescale of 52 : 0 : 2 :  
0

|              | f1-score | precision | recall   | support |
|--------------|----------|-----------|----------|---------|
| AFIB         | 0.785372 | 0.802867  | 0.768848 | 204.0   |
| GSVT         | 0.795061 | 0.783417  | 0.807388 | 300.0   |
| SB           | 0.813027 | 0.804948  | 0.821307 | 892.0   |
| SR           | 0.798030 | 0.809492  | 0.786912 | 681.0   |
| macro avg    | 0.797873 | 0.800181  | 0.796114 | 2077.0  |
| micro avg    | 0.802867 | 0.802867  | 0.802867 | 2077.0  |
| weighted avg | 0.802799 | 0.803123  | 0.802867 | 2077.0  |

The result of Model Number:Dataset Number:Featuregroup Number:Rescale of 52 : 0 : 2 :  
1

|              | f1-score | precision | recall   | support |
|--------------|----------|-----------|----------|---------|
| AFIB         | 0.865300 | 0.868457  | 0.862222 | 875.0   |
| GSVT         | 0.880255 | 0.868793  | 0.892099 | 691.0   |
| SB           | 0.927878 | 0.917658  | 0.938334 | 1553.0  |
| SR           | 0.879362 | 0.903654  | 0.856390 | 907.0   |
| macro avg    | 0.888199 | 0.889641  | 0.887261 | 4026.0  |
| micro avg    | 0.895396 | 0.895396  | 0.895396 | 4026.0  |
| weighted avg | 0.895174 | 0.895423  | 0.895396 | 4026.0  |

The result of Model Number:Dataset Number:Featuregroup Number:Rescale of 52 : 0 : 3 :  
0

|              | f1-score | precision | recall   | support |
|--------------|----------|-----------|----------|---------|
| AFIB         | 0.890207 | 0.923212  | 0.859608 | 204.0   |
| GSVT         | 0.916877 | 0.905412  | 0.928752 | 300.0   |
| SB           | 0.940127 | 0.931548  | 0.948873 | 892.0   |
| SR           | 0.915410 | 0.922514  | 0.908424 | 681.0   |
| macro avg    | 0.915655 | 0.920672  | 0.911414 | 2077.0  |
| micro avg    | 0.923937 | 0.923937  | 0.923937 | 2077.0  |
| weighted avg | 0.923762 | 0.923993  | 0.923937 | 2077.0  |

The result of Model Number:Dataset Number:Featuregroup Number:Rescale of 52 : 0 : 3 :  
1

|      | f1-score | precision | recall   | support |
|------|----------|-----------|----------|---------|
| AFIB | 0.819184 | 0.831219  | 0.807568 | 204.0   |

GSVT 0.839940 0.832799 0.847221 300.0  
SB 0.854456 0.851038 0.857904 892.0  
SR 0.846006 0.850158 0.841903 681.0  
macro avg 0.839897 0.841304 0.838649 2077.0  
micro avg 0.846171 0.846171 0.846171 2077.0  
weighted avg 0.846124 0.846168 0.846171 2077.0  
The result of Model Number:Dataset Number:Featuregroup Number:Rescale of 52 : 0 : 4 :  
0

f1-score precision recall support  
AFIB 0.868520 0.891258 0.847310 204.0  
GSVT 0.817218 0.840969 0.795216 300.0  
SB 0.862339 0.831978 0.895016 892.0  
SR 0.781605 0.807060 0.757865 681.0  
macro avg 0.832421 0.842816 0.823852 2077.0  
micro avg 0.830947 0.830947 0.830947 2077.0  
weighted avg 0.829958 0.830929 0.830947 2077.0  
The result of Model Number:Dataset Number:Featuregroup Number:Rescale of 52 : 0 : 4 :  
1

f1-score precision recall support  
AFIB 0.780631 0.786933 0.774496 204.0  
GSVT 0.798543 0.794627 0.802525 300.0  
SB 0.814128 0.813225 0.815040 892.0  
SR 0.808049 0.809123 0.806983 681.0  
macro avg 0.800338 0.800977 0.799761 2077.0  
micro avg 0.806608 0.806608 0.806608 2077.0  
weighted avg 0.806594 0.806612 0.806608 2077.0  
The result of Model Number:Dataset Number:Featuregroup Number:Rescale of 52 : 0 : 5 :  
0

f1-score precision recall support  
AFIB 0.768164 0.771971 0.764476 875.0  
GSVT 0.775812 0.776930 0.774815 691.0  
SB 0.816647 0.812858 0.820480 1553.0  
SR 0.801614 0.803621 0.799660 907.0  
macro avg 0.790559 0.791345 0.789858 4026.0  
micro avg 0.795780 0.795780 0.795780 4026.0  
weighted avg 0.795714 0.795724 0.795780 4026.0  
The result of Model Number:Dataset Number:Featuregroup Number:Rescale of 52 : 0 : 5 :  
1

f1-score precision recall support  
AFIB 0.758256 0.781694 0.736843 204.0  
GSVT 0.707822 0.723210 0.693598 300.0  
SB 0.746573 0.713439 0.782972 892.0  
SR 0.672207 0.706749 0.640979 681.0  
macro avg 0.721215 0.731273 0.713598 2077.0

micro avg 0.718976 0.718976 0.718976 2077.0  
weighted avg 0.717741 0.719361 0.718976 2077.0  
The result of Model Number:Dataset Number:Featuregroup Number:Rescale of 52 : 0 : 6 :  
0

|              | f1-score | precision | recall   | support |
|--------------|----------|-----------|----------|---------|
| AFIB         | 0.725991 | 0.730131  | 0.722017 | 204.0   |
| GSVT         | 0.740928 | 0.735584  | 0.746358 | 300.0   |
| SB           | 0.755893 | 0.753132  | 0.758687 | 892.0   |
| SR           | 0.747853 | 0.752764  | 0.743026 | 681.0   |
| macro avg    | 0.742666 | 0.742903  | 0.742522 | 2077.0  |
| micro avg    | 0.748170 | 0.748170  | 0.748170 | 2077.0  |
| weighted avg | 0.748158 | 0.748217  | 0.748170 | 2077.0  |

The result of Model Number:Dataset Number:Featuregroup Number:Rescale of 52 : 0 : 6 :  
1

|              | f1-score | precision | recall   | support |
|--------------|----------|-----------|----------|---------|
| AFIB         | 0.803926 | 0.791600  | 0.816776 | 875.0   |
| GSVT         | 0.831647 | 0.839798  | 0.823816 | 691.0   |
| SB           | 0.885094 | 0.883026  | 0.887199 | 1553.0  |
| SR           | 0.862984 | 0.873926  | 0.852331 | 907.0   |
| macro avg    | 0.845913 | 0.847088  | 0.845031 | 4026.0  |
| micro avg    | 0.853160 | 0.853160  | 0.853160 | 4026.0  |
| weighted avg | 0.853299 | 0.853686  | 0.853160 | 4026.0  |

The result of Model Number:Dataset Number:Featuregroup Number:Rescale of 52 : 0 : 7 :  
0

|              | f1-score | precision | recall   | support |
|--------------|----------|-----------|----------|---------|
| AFIB         | 0.646699 | 0.655607  | 0.638314 | 875.0   |
| GSVT         | 0.660817 | 0.658080  | 0.663755 | 691.0   |
| SB           | 0.703873 | 0.694644  | 0.713380 | 1553.0  |
| SR           | 0.681774 | 0.691956  | 0.672191 | 907.0   |
| macro avg    | 0.673291 | 0.675072  | 0.671910 | 4026.0  |
| micro avg    | 0.679269 | 0.679269  | 0.679269 | 4026.0  |
| weighted avg | 0.679078 | 0.679279  | 0.679269 | 4026.0  |

The result of Model Number:Dataset Number:Featuregroup Number:Rescale of 52 : 0 : 7 :  
1

|              | f1-score | precision | recall   | support |
|--------------|----------|-----------|----------|---------|
| AFIB         | 0.732363 | 0.768955  | 0.699464 | 204.0   |
| GSVT         | 0.754442 | 0.740460  | 0.769224 | 300.0   |
| SB           | 0.771707 | 0.763928  | 0.779662 | 892.0   |
| SR           | 0.750305 | 0.757007  | 0.743789 | 681.0   |
| macro avg    | 0.752204 | 0.757588  | 0.748035 | 2077.0  |
| micro avg    | 0.758516 | 0.758516  | 0.758516 | 2077.0  |
| weighted avg | 0.758332 | 0.758763  | 0.758516 | 2077.0  |

The result of Model Number:Dataset Number:Featuregroup Number:Rescale of 52 : 0 : 8 :  
0

f1-score precision recall support  
AFIB 0.736821 0.731185 0.742642 875.0  
GSVT 0.753774 0.757896 0.749741 691.0  
SB 0.798186 0.797627 0.798751 1553.0  
SR 0.776985 0.780754 0.773292 907.0  
macro avg 0.766441 0.766865 0.766107 4026.0  
micro avg 0.772409 0.772409 0.772409 4026.0  
weighted avg 0.772450 0.772566 0.772409 4026.0  
The result of Model Number:Dataset Number:Featuregroup Number:Rescale of 52 : 0 : 8 :  
1

f1-score precision recall support  
AFIB 0.885461 0.954475 0.826166 204.0  
GSVT 0.912464 0.927910 0.897562 300.0  
SB 0.967040 0.958140 0.976136 892.0  
SR 0.928550 0.915085 0.942461 681.0  
macro avg 0.923379 0.938902 0.910581 2077.0  
micro avg 0.939016 0.939016 0.939016 2077.0  
weighted avg 0.938525 0.939297 0.939016 2077.0  
The result of Model Number:Dataset Number:Featuregroup Number:Rescale of 52 : 0 : 9 :  
0

f1-score precision recall support  
AFIB 0.831442 0.837757 0.825293 204.0  
GSVT 0.848464 0.840177 0.856935 300.0  
SB 0.868255 0.866036 0.870494 892.0  
SR 0.859046 0.863898 0.854257 681.0  
macro avg 0.851802 0.851967 0.851745 2077.0  
micro avg 0.858772 0.858772 0.858772 2077.0  
weighted avg 0.858761 0.858822 0.858772 2077.0  
The result of Model Number:Dataset Number:Featuregroup Number:Rescale of 52 : 0 : 9 :  
1

f1-score precision recall support  
AFIB 0.740448 0.746580 0.834013 204.0  
GSVT 0.802966 0.768598 0.905933 300.0  
SB 0.733138 0.730590 0.735705 892.0  
SR 0.725848 0.725985 0.725716 681.0  
macro avg 0.750600 0.742938 0.800342 2077.0  
micro avg 0.766673 0.766673 0.766673 2077.0  
weighted avg 0.741551 0.736140 0.766673 2077.0  
The result of Model Number:Dataset Number:Featuregroup Number:Rescale of 52 : 0 :  
10 : 0

f1-score precision recall support  
AFIB 0.874793 0.874740 0.874900 875.0  
GSVT 0.876686 0.871946 0.881493 691.0  
SB 0.918569 0.912457 0.924775 1553.0

SR 0.894178 0.908848 0.880006 907.0  
macro avg 0.891056 0.891998 0.890294 4026.0  
micro avg 0.896421 0.896421 0.896421 4026.0  
weighted avg 0.896371 0.896494 0.896421 4026.0  
The result of Model Number:Dataset Number:Featuregroup Number:Rescale of 52 : 0 :  
10 : 1

f1-score precision recall support  
AFIB 0.829863 0.834596 0.825321 204.0  
GSVT 0.846938 0.840829 0.853145 300.0  
SB 0.864043 0.860887 0.867238 892.0  
SR 0.854854 0.860467 0.849335 681.0  
macro avg 0.848925 0.849195 0.848760 2077.0  
micro avg 0.855215 0.855215 0.855215 2077.0  
weighted avg 0.855202 0.855270 0.855215 2077.0

The result of Model Number:Dataset Number:Featuregroup Number:Rescale of 52 : 1 : 0 :  
0

f1-score precision recall support  
AFIB 0.828764 0.832148 0.825433 875.0  
GSVT 0.771739 0.805799 0.740569 691.0  
SB 0.828802 0.750787 0.924922 1553.0  
SR 0.625194 0.778113 0.522719 907.0  
macro avg 0.763625 0.791712 0.753411 4026.0  
micro avg 0.781047 0.781047 0.781047 4026.0  
weighted avg 0.773130 0.784068 0.781047 4026.0

The result of Model Number:Dataset Number:Featuregroup Number:Rescale of 52 : 1 : 0 :  
1

f1-score precision recall support  
AFIB 0.649237 0.669306 0.630903 204.0  
GSVT 0.606055 0.619230 0.593876 300.0  
SB 0.639235 0.610864 0.670400 892.0  
SR 0.575561 0.605136 0.548823 681.0  
macro avg 0.617522 0.626134 0.611000 2077.0  
micro avg 0.615605 0.615605 0.615605 2077.0  
weighted avg 0.614547 0.615935 0.615605 2077.0

The result of Model Number:Dataset Number:Featuregroup Number:Rescale of 52 : 1 : 1 :  
0

f1-score precision recall support  
AFIB 0.799804 0.810487 0.789624 204.0  
GSVT 0.813933 0.808974 0.819077 300.0  
SB 0.833553 0.832814 0.834299 892.0  
SR 0.827393 0.827519 0.827273 681.0  
macro avg 0.818671 0.819949 0.817568 2077.0  
micro avg 0.825409 0.825409 0.825409 2077.0  
weighted avg 0.825385 0.825442 0.825409 2077.0

The result of Model Number:Dataset Number:Featuregroup Number:Rescale of 52 : 1 : 1 : 1

|              | f1-score | precision | recall   | support |
|--------------|----------|-----------|----------|---------|
| AFIB         | 0.633878 | 0.627771  | 0.640202 | 875.0   |
| GSVT         | 0.650485 | 0.652346  | 0.648703 | 691.0   |
| SB           | 0.691578 | 0.689987  | 0.693180 | 1553.0  |
| SR           | 0.672124 | 0.680032  | 0.664411 | 907.0   |
| macro avg    | 0.662016 | 0.662534  | 0.661624 | 4026.0  |
| micro avg    | 0.667551 | 0.667551  | 0.667551 | 4026.0  |
| weighted avg | 0.667602 | 0.667762  | 0.667551 | 4026.0  |

The result of Model Number:Dataset Number:Featuregroup Number:Rescale of 52 : 1 : 2 : 0

|              | f1-score | precision | recall   | support |
|--------------|----------|-----------|----------|---------|
| AFIB         | 0.711363 | 0.712995  | 0.709815 | 875.0   |
| GSVT         | 0.713843 | 0.711830  | 0.715890 | 691.0   |
| SB           | 0.749167 | 0.742963  | 0.755485 | 1553.0  |
| SR           | 0.726692 | 0.737598  | 0.716134 | 907.0   |
| macro avg    | 0.725266 | 0.726346  | 0.724331 | 4026.0  |
| micro avg    | 0.729898 | 0.729898  | 0.729898 | 4026.0  |
| weighted avg | 0.729824 | 0.729898  | 0.729898 | 4026.0  |

The result of Model Number:Dataset Number:Featuregroup Number:Rescale of 52 : 1 : 2 : 1

|              | f1-score | precision | recall   | support |
|--------------|----------|-----------|----------|---------|
| AFIB         | 0.779534 | 0.808533  | 0.752892 | 204.0   |
| GSVT         | 0.723378 | 0.756946  | 0.692728 | 300.0   |
| SB           | 0.757767 | 0.712062  | 0.809756 | 892.0   |
| SR           | 0.665466 | 0.711702  | 0.624949 | 681.0   |
| macro avg    | 0.731536 | 0.747311  | 0.720081 | 2077.0  |
| micro avg    | 0.726673 | 0.726673  | 0.726673 | 2077.0  |
| weighted avg | 0.724675 | 0.727903  | 0.726673 | 2077.0  |

The result of Model Number:Dataset Number:Featuregroup Number:Rescale of 52 : 1 : 3 : 0

|              | f1-score | precision | recall   | support |
|--------------|----------|-----------|----------|---------|
| AFIB         | 0.691694 | 0.699380  | 0.684530 | 204.0   |
| GSVT         | 0.713120 | 0.709060  | 0.717433 | 300.0   |
| SB           | 0.727306 | 0.726332  | 0.728284 | 892.0   |
| SR           | 0.721119 | 0.722085  | 0.720165 | 681.0   |
| macro avg    | 0.713310 | 0.714214  | 0.712603 | 2077.0  |
| micro avg    | 0.719758 | 0.719758  | 0.719758 | 2077.0  |
| weighted avg | 0.719731 | 0.719798  | 0.719758 | 2077.0  |

The result of Model Number:Dataset Number:Featuregroup Number:Rescale of 52 : 1 : 3 : 1

|      | f1-score | precision | recall   | support |
|------|----------|-----------|----------|---------|
| AFIB | 0.878676 | 0.885622  | 0.871867 | 875.0   |

GSVT 0.900786 0.898882 0.902733 691.0  
SB 0.960265 0.951777 0.968917 1553.0  
SR 0.934701 0.943869 0.925733 907.0  
macro avg 0.918607 0.920038 0.917313 4026.0  
micro avg 0.926736 0.926736 0.926736 4026.0  
weighted avg 0.926565 0.926539 0.926736 4026.0  
The result of Model Number:Dataset Number:Featuregroup Number:Rescale of 52 : 1 : 4 :  
0

f1-score precision recall support  
AFIB 0.839727 0.833262 0.846358 875.0  
GSVT 0.850630 0.854579 0.846902 691.0  
SB 0.911568 0.906719 0.916489 1553.0  
SR 0.884711 0.897149 0.872710 907.0  
macro avg 0.871659 0.872927 0.870615 4026.0  
micro avg 0.879441 0.879441 0.879441 4026.0  
weighted avg 0.879445 0.879649 0.879441 4026.0  
The result of Model Number:Dataset Number:Featuregroup Number:Rescale of 52 : 1 : 4 :  
1

f1-score precision recall support  
AFIB 0.773604 0.789898 0.758092 204.0  
GSVT 0.797657 0.790369 0.805098 300.0  
SB 0.810684 0.808877 0.812502 892.0  
SR 0.801050 0.801887 0.800223 681.0  
macro avg 0.795749 0.797758 0.793978 2077.0  
micro avg 0.802062 0.802062 0.802062 2077.0  
weighted avg 0.802001 0.802048 0.802062 2077.0  
The result of Model Number:Dataset Number:Featuregroup Number:Rescale of 52 : 1 : 5 :  
0

f1-score precision recall support  
AFIB 0.746414 0.828367 0.679396 204.0  
GSVT 0.871539 0.860643 0.882885 300.0  
SB 0.927275 0.922543 0.932056 892.0  
SR 0.905552 0.892892 0.918581 681.0  
macro avg 0.862695 0.876111 0.853230 2077.0  
micro avg 0.895720 0.895720 0.895720 2077.0  
weighted avg 0.894338 0.894631 0.895720 2077.0  
The result of Model Number:Dataset Number:Featuregroup Number:Rescale of 52 : 1 : 5 :  
1

f1-score precision recall support  
AFIB 0.858973 0.848842 0.869384 875.0  
GSVT 0.875852 0.883470 0.868373 691.0  
SB 0.933442 0.929870 0.937046 1553.0  
SR 0.911418 0.922437 0.900669 907.0  
macro avg 0.894922 0.896155 0.893868 4026.0



micro avg 0.902359 0.902359 0.902359 4026.0  
weighted avg 0.902411 0.902621 0.902359 4026.0  
The result of Model Number:Dataset Number:Featuregroup Number:Rescale of 52 : 1 : 6 :  
0

|              | f1-score | precision | recall   | support |
|--------------|----------|-----------|----------|---------|
| AFIB         | 0.675802 | 0.681938  | 0.670123 | 204.0   |
| GSVT         | 0.698138 | 0.693919  | 0.702592 | 300.0   |
| SB           | 0.712744 | 0.711788  | 0.713702 | 892.0   |
| SR           | 0.706149 | 0.707613  | 0.704696 | 681.0   |
| macro avg    | 0.698208 | 0.698814  | 0.697778 | 2077.0  |
| micro avg    | 0.704864 | 0.704864  | 0.704864 | 2077.0  |
| weighted avg | 0.704843 | 0.704906  | 0.704864 | 2077.0  |

The result of Model Number:Dataset Number:Featuregroup Number:Rescale of 52 : 1 : 6 :  
1

|              | f1-score | precision | recall   | support |
|--------------|----------|-----------|----------|---------|
| AFIB         | 0.772687 | 0.791487  | 0.754949 | 204.0   |
| GSVT         | 0.782400 | 0.771629  | 0.793580 | 300.0   |
| SB           | 0.798198 | 0.790227  | 0.806337 | 892.0   |
| SR           | 0.784262 | 0.794554  | 0.774255 | 681.0   |
| macro avg    | 0.784386 | 0.786974  | 0.782280 | 2077.0  |
| micro avg    | 0.788928 | 0.788928  | 0.788928 | 2077.0  |
| weighted avg | 0.788841 | 0.789083  | 0.788928 | 2077.0  |

The result of Model Number:Dataset Number:Featuregroup Number:Rescale of 52 : 1 : 7 :  
0

|              | f1-score | precision | recall   | support |
|--------------|----------|-----------|----------|---------|
| AFIB         | 0.793755 | 0.799691  | 0.787938 | 204.0   |
| GSVT         | 0.814037 | 0.809741  | 0.818380 | 300.0   |
| SB           | 0.827775 | 0.826668  | 0.828887 | 892.0   |
| SR           | 0.820484 | 0.822057  | 0.818919 | 681.0   |
| macro avg    | 0.814013 | 0.814539  | 0.813531 | 2077.0  |
| micro avg    | 0.820079 | 0.820079  | 0.820079 | 2077.0  |
| weighted avg | 0.820059 | 0.820062  | 0.820079 | 2077.0  |

The result of Model Number:Dataset Number:Featuregroup Number:Rescale of 52 : 1 : 7 :  
1

|              | f1-score | precision | recall   | support |
|--------------|----------|-----------|----------|---------|
| AFIB         | 0.838788 | 0.882122  | 0.799761 | 204.0   |
| GSVT         | 0.879541 | 0.870944  | 0.888329 | 300.0   |
| SB           | 0.895049 | 0.887849  | 0.902372 | 892.0   |
| SR           | 0.883994 | 0.885070  | 0.882956 | 681.0   |
| macro avg    | 0.874343 | 0.881496  | 0.868355 | 2077.0  |
| micro avg    | 0.883899 | 0.883899  | 0.883899 | 2077.0  |
| weighted avg | 0.883658 | 0.883933  | 0.883899 | 2077.0  |

The result of Model Number:Dataset Number:Featuregroup Number:Rescale of 52 : 1 : 8 :  
0

f1-score precision recall support  
AFIB 0.659892 0.657984 0.661871 875.0  
GSVT 0.672122 0.671576 0.672717 691.0  
SB 0.713891 0.710935 0.716879 1553.0  
SR 0.692460 0.700067 0.685053 907.0  
macro avg 0.684591 0.685140 0.684130 4026.0  
micro avg 0.690174 0.690174 0.690174 4026.0  
weighted avg 0.690158 0.690223 0.690174 4026.0  
The result of Model Number:Dataset Number:Featuregroup Number:Rescale of 52 : 1 : 8 :  
1

f1-score precision recall support  
AFIB 0.778604 0.771642 0.785726 875.0  
GSVT 0.791105 0.794235 0.788028 691.0  
SB 0.843487 0.841921 0.845061 1553.0  
SR 0.822113 0.829712 0.814681 907.0  
macro avg 0.808827 0.809378 0.808374 4026.0  
micro avg 0.815532 0.815532 0.815532 4026.0  
weighted avg 0.815579 0.815712 0.815532 4026.0  
The result of Model Number:Dataset Number:Featuregroup Number:Rescale of 52 : 1 : 9 :  
0

f1-score precision recall support  
AFIB 0.763229 0.761022 0.765518 875.0  
GSVT 0.777374 0.776742 0.778062 691.0  
SB 0.825684 0.822264 0.829139 1553.0  
SR 0.800896 0.809695 0.792330 907.0  
macro avg 0.791796 0.792431 0.791262 4026.0  
micro avg 0.798253 0.798253 0.798253 4026.0  
weighted avg 0.798234 0.798309 0.798253 4026.0  
The result of Model Number:Dataset Number:Featuregroup Number:Rescale of 52 : 1 : 9 :  
1

f1-score precision recall support  
AFIB 0.652397 0.676585 0.629972 204.0  
GSVT 0.671942 0.663541 0.680645 300.0  
SB 0.688981 0.682695 0.695391 892.0  
SR 0.670868 0.676074 0.665747 681.0  
macro avg 0.671047 0.674724 0.667939 2077.0  
micro avg 0.677116 0.677116 0.677116 2077.0  
weighted avg 0.676988 0.677157 0.677116 2077.0  
The result of Model Number:Dataset Number:Featuregroup Number:Rescale of 52 : 1 :  
10 : 0

f1-score precision recall support  
AFIB 0.751801 0.779674 0.725959 204.0  
GSVT 0.774324 0.764642 0.784352 300.0  
SB 0.793959 0.786714 0.801345 892.0

SR 0.773085 0.779085 0.767185 681.0  
macro avg 0.773292 0.777529 0.769710 2077.0  
micro avg 0.780286 0.780286 0.780286 2077.0  
weighted avg 0.780138 0.780333 0.780286 2077.0  
The result of Model Number:Dataset Number:Featuregroup Number:Rescale of 52 : 1 :  
10 : 1

f1-score precision recall support  
AFIB 0.824071 0.825663 0.822547 875.0  
GSVT 0.798385 0.794878 0.801971 691.0  
SB 0.834218 0.783514 0.891961 1553.0  
SR 0.671429 0.777990 0.590701 907.0  
macro avg 0.782026 0.795511 0.776795 4026.0  
micro avg 0.793560 0.793560 0.793560 4026.0  
weighted avg 0.789188 0.793381 0.793560 4026.0

The result of Model Number:Dataset Number:Featuregroup Number:Rescale of 53 : 0 : 0 :  
0

f1-score precision recall support  
AFIB 0.859858 0.864245 0.855544 875.0  
GSVT 0.871725 0.867189 0.876383 691.0  
SB 0.913704 0.912887 0.914528 1553.0  
SR 0.896879 0.897610 0.896186 907.0  
macro avg 0.885541 0.885483 0.885660 4026.0  
micro avg 0.891030 0.891030 0.891030 4026.0  
weighted avg 0.891006 0.891030 0.891030 4026.0

The result of Model Number:Dataset Number:Featuregroup Number:Rescale of 53 : 0 : 0 :  
1

f1-score precision recall support  
AFIB 0.763453 0.782785 0.745124 204.0  
GSVT 0.780033 0.771551 0.788833 300.0  
SB 0.802004 0.798001 0.806049 892.0  
SR 0.789573 0.793115 0.786094 681.0  
macro avg 0.783766 0.786363 0.781525 2077.0  
micro avg 0.791036 0.791036 0.791036 2077.0  
weighted avg 0.790968 0.791084 0.791036 2077.0

The result of Model Number:Dataset Number:Featuregroup Number:Rescale of 53 : 0 : 1 :  
0

f1-score precision recall support  
AFIB 0.559168 0.617654 0.510963 204.0  
GSVT 0.657822 0.649137 0.666813 300.0  
SB 0.697618 0.694907 0.700354 892.0  
SR 0.680854 0.671151 0.690850 681.0  
macro avg 0.648866 0.658212 0.642245 2077.0  
micro avg 0.673792 0.673792 0.673792 2077.0  
weighted avg 0.672775 0.672919 0.673792 2077.0

The result of Model Number:Dataset Number:Featuregroup Number:Rescale of 53 : 0 : 1 :  
1

|              | f1-score | precision | recall   | support |
|--------------|----------|-----------|----------|---------|
| AFIB         | 0.790838 | 0.800086  | 0.781949 | 204.0   |
| GSVT         | 0.713340 | 0.686106  | 0.813911 | 300.0   |
| SB           | 0.661834 | 0.660274  | 0.663407 | 892.0   |
| SR           | 0.821774 | 0.823354  | 0.820207 | 681.0   |
| macro avg    | 0.746946 | 0.742455  | 0.769868 | 2077.0  |
| micro avg    | 0.748200 | 0.748200  | 0.748200 | 2077.0  |
| weighted avg | 0.734385 | 0.731207  | 0.748200 | 2077.0  |

The result of Model Number:Dataset Number:Featuregroup Number:Rescale of 53 : 0 : 2 :  
0

|              | f1-score | precision | recall   | support |
|--------------|----------|-----------|----------|---------|
| AFIB         | 0.822398 | 0.824585  | 0.820272 | 875.0   |
| GSVT         | 0.838212 | 0.832307  | 0.844251 | 691.0   |
| SB           | 0.886089 | 0.877055  | 0.895329 | 1553.0  |
| SR           | 0.845585 | 0.864003  | 0.827965 | 907.0   |
| macro avg    | 0.848071 | 0.849487  | 0.846954 | 4026.0  |
| micro avg    | 0.855074 | 0.855074  | 0.855074 | 4026.0  |
| weighted avg | 0.854904 | 0.855030  | 0.855074 | 4026.0  |

The result of Model Number:Dataset Number:Featuregroup Number:Rescale of 53 : 0 : 2 :  
1

|              | f1-score | precision | recall   | support |
|--------------|----------|-----------|----------|---------|
| AFIB         | 0.904123 | 0.910884  | 0.897497 | 204.0   |
| GSVT         | 0.927225 | 0.922332  | 0.932172 | 300.0   |
| SB           | 0.942873 | 0.941612  | 0.944141 | 892.0   |
| SR           | 0.934569 | 0.936361  | 0.932786 | 681.0   |
| macro avg    | 0.927198 | 0.927797  | 0.926649 | 2077.0  |
| micro avg    | 0.934108 | 0.934108  | 0.934108 | 2077.0  |
| weighted avg | 0.934084 | 0.934088  | 0.934108 | 2077.0  |

The result of Model Number:Dataset Number:Featuregroup Number:Rescale of 53 : 0 : 3 :  
0

|              | f1-score | precision | recall   | support |
|--------------|----------|-----------|----------|---------|
| AFIB         | 0.777807 | 0.767033  | 0.788918 | 875.0   |
| GSVT         | 0.795058 | 0.801492  | 0.788730 | 691.0   |
| SB           | 0.843944 | 0.841519  | 0.846389 | 1553.0  |
| SR           | 0.823414 | 0.834131  | 0.812977 | 907.0   |
| macro avg    | 0.810056 | 0.811044  | 0.809253 | 4026.0  |
| micro avg    | 0.816475 | 0.816475  | 0.816475 | 4026.0  |
| weighted avg | 0.816554 | 0.816796  | 0.816475 | 4026.0  |

The result of Model Number:Dataset Number:Featuregroup Number:Rescale of 53 : 0 : 3 :  
1

|      | f1-score | precision | recall   | support |
|------|----------|-----------|----------|---------|
| AFIB | 0.690958 | 0.692195  | 0.689746 | 875.0   |

GSVT 0.661638 0.665114 0.658217 691.0  
SB 0.699853 0.661354 0.743117 1553.0  
SR 0.581231 0.654218 0.522946 907.0  
macro avg 0.658420 0.668220 0.653507 4026.0  
micro avg 0.667344 0.667344 0.667344 4026.0  
weighted avg 0.664637 0.667095 0.667344 4026.0  
The result of Model Number:Dataset Number:Featuregroup Number:Rescale of 53 : 0 : 4 :  
0

f1-score precision recall support  
AFIB 0.776369 0.796363 0.757386 204.0  
GSVT 0.712454 0.680740 0.804004 300.0  
SB 0.817391 0.815479 0.819314 892.0  
SR 0.648452 0.648573 0.648338 681.0  
macro avg 0.738666 0.735289 0.757260 2077.0  
micro avg 0.754961 0.754961 0.754961 2077.0  
weighted avg 0.742814 0.739415 0.754961 2077.0  
The result of Model Number:Dataset Number:Featuregroup Number:Rescale of 53 : 0 : 4 :  
1

f1-score precision recall support  
AFIB 0.718620 0.734628 0.703501 204.0  
GSVT 0.727486 0.716831 0.738765 300.0  
SB 0.743925 0.736532 0.751501 892.0  
SR 0.730202 0.740690 0.720030 681.0  
macro avg 0.730058 0.732170 0.728449 2077.0  
micro avg 0.734628 0.734628 0.734628 2077.0  
weighted avg 0.734566 0.734863 0.734628 2077.0  
The result of Model Number:Dataset Number:Featuregroup Number:Rescale of 53 : 0 : 5 :  
0

f1-score precision recall support  
AFIB 0.681064 0.687273 0.675055 204.0  
GSVT 0.698837 0.696549 0.701162 300.0  
SB 0.711613 0.711138 0.712090 892.0  
SR 0.705354 0.705151 0.705567 681.0  
macro avg 0.699217 0.700028 0.698469 2077.0  
micro avg 0.704736 0.704736 0.704736 2077.0  
weighted avg 0.704715 0.704724 0.704736 2077.0  
The result of Model Number:Dataset Number:Featuregroup Number:Rescale of 53 : 0 : 5 :  
1

f1-score precision recall support  
AFIB 0.622418 0.617727 0.706436 204.0  
GSVT 0.754560 0.750092 0.759088 300.0  
SB 0.617124 0.615837 0.618421 892.0  
SR 0.763239 0.762017 0.764473 681.0  
macro avg 0.689335 0.686418 0.712105 2077.0

micro avg 0.695271 0.695271 0.695271 2077.0  
weighted avg 0.685403 0.683343 0.695271 2077.0  
The result of Model Number:Dataset Number:Featuregroup Number:Rescale of 53 : 0 : 6 :  
0

|              | f1-score | precision | recall   | support |
|--------------|----------|-----------|----------|---------|
| AFIB         | 0.892573 | 0.941127  | 0.849011 | 204.0   |
| GSVT         | 0.937037 | 0.922865  | 0.951688 | 300.0   |
| SB           | 0.959304 | 0.953064  | 0.965641 | 892.0   |
| SR           | 0.947469 | 0.948323  | 0.946639 | 681.0   |
| macro avg    | 0.934096 | 0.941344  | 0.928245 | 2077.0  |
| micro avg    | 0.945940 | 0.945940  | 0.945940 | 2077.0  |
| weighted avg | 0.945653 | 0.945975  | 0.945940 | 2077.0  |

The result of Model Number:Dataset Number:Featuregroup Number:Rescale of 53 : 0 : 6 :  
1

|              | f1-score | precision | recall   | support |
|--------------|----------|-----------|----------|---------|
| AFIB         | 0.900650 | 0.919036  | 0.883384 | 204.0   |
| GSVT         | 0.933354 | 0.925245  | 0.941777 | 300.0   |
| SB           | 0.951299 | 0.949601  | 0.953006 | 892.0   |
| SR           | 0.942445 | 0.943007  | 0.941889 | 681.0   |
| macro avg    | 0.931937 | 0.934222  | 0.930014 | 2077.0  |
| micro avg    | 0.940901 | 0.940901  | 0.940901 | 2077.0  |
| weighted avg | 0.940830 | 0.940919  | 0.940901 | 2077.0  |

The result of Model Number:Dataset Number:Featuregroup Number:Rescale of 53 : 0 : 7 :  
0

|              | f1-score | precision | recall   | support |
|--------------|----------|-----------|----------|---------|
| AFIB         | 0.847277 | 0.851722  | 0.842929 | 875.0   |
| GSVT         | 0.864993 | 0.863440  | 0.866615 | 691.0   |
| SB           | 0.939235 | 0.932032  | 0.946552 | 1553.0  |
| SR           | 0.906098 | 0.915167  | 0.897212 | 907.0   |
| macro avg    | 0.889401 | 0.890590  | 0.888327 | 4026.0  |
| micro avg    | 0.899195 | 0.899195  | 0.899195 | 4026.0  |
| weighted avg | 0.899041 | 0.899005  | 0.899195 | 4026.0  |

The result of Model Number:Dataset Number:Featuregroup Number:Rescale of 53 : 0 : 7 :  
1

|              | f1-score | precision | recall   | support |
|--------------|----------|-----------|----------|---------|
| AFIB         | 0.841267 | 0.834574  | 0.848147 | 875.0   |
| GSVT         | 0.807910 | 0.792549  | 0.823946 | 691.0   |
| SB           | 0.847931 | 0.782714  | 0.925018 | 1553.0  |
| SR           | 0.649280 | 0.830199  | 0.533224 | 907.0   |
| macro avg    | 0.786597 | 0.810009  | 0.782584 | 4026.0  |
| micro avg    | 0.802698 | 0.802698  | 0.802698 | 4026.0  |
| weighted avg | 0.794861 | 0.806371  | 0.802698 | 4026.0  |

The result of Model Number:Dataset Number:Featuregroup Number:Rescale of 53 : 0 : 8 :  
0

f1-score precision recall support  
AFIB 0.793766 0.799864 0.787942 204.0  
GSVT 0.821719 0.820931 0.822535 300.0  
SB 0.838530 0.836577 0.840501 892.0  
SR 0.830813 0.831933 0.829715 681.0  
macro avg 0.821207 0.822326 0.820173 2077.0  
micro avg 0.829207 0.829207 0.829207 2077.0  
weighted avg 0.829175 0.829189 0.829207 2077.0  
The result of Model Number:Dataset Number:Featuregroup Number:Rescale of 53 : 0 : 8 :  
1

f1-score precision recall support  
AFIB 0.775882 0.840652 0.721925 204.0  
GSVT 0.832223 0.821758 0.843297 300.0  
SB 0.853468 0.841512 0.865869 892.0  
SR 0.830187 0.834076 0.826739 681.0  
macro avg 0.822940 0.834500 0.814457 2077.0  
micro avg 0.835641 0.835641 0.835641 2077.0  
weighted avg 0.835146 0.836136 0.835641 2077.0  
The result of Model Number:Dataset Number:Featuregroup Number:Rescale of 53 : 0 : 9 :  
0

f1-score precision recall support  
AFIB 0.688192 0.725913 0.654656 204.0  
GSVT 0.655305 0.678281 0.633916 300.0  
SB 0.674046 0.648049 0.702227 892.0  
SR 0.599919 0.616195 0.584515 681.0  
macro avg 0.654366 0.667109 0.643829 2077.0  
micro avg 0.649093 0.649093 0.649093 2077.0  
weighted avg 0.648424 0.649619 0.649093 2077.0  
The result of Model Number:Dataset Number:Featuregroup Number:Rescale of 53 : 0 : 9 :  
1

f1-score precision recall support  
AFIB 0.854011 0.863996 0.844418 204.0  
GSVT 0.877504 0.873469 0.881600 300.0  
SB 0.889928 0.887161 0.892719 892.0  
SR 0.882264 0.884765 0.879815 681.0  
macro avg 0.875927 0.877348 0.874638 2077.0  
micro avg 0.882138 0.882138 0.882138 2077.0  
weighted avg 0.882093 0.882122 0.882138 2077.0  
The result of Model Number:Dataset Number:Featuregroup Number:Rescale of 53 : 0 :  
10 : 0

f1-score precision recall support  
AFIB 0.654796 0.657186 0.652467 875.0  
GSVT 0.666114 0.657440 0.675076 691.0  
SB 0.702151 0.694418 0.710063 1553.0

SR 0.665438 0.683820 0.648054 907.0  
macro avg 0.672125 0.673216 0.671415 4026.0  
micro avg 0.677571 0.677571 0.677571 4026.0  
weighted avg 0.677403 0.677592 0.677571 4026.0  
The result of Model Number:Dataset Number:Featuregroup Number:Rescale of 53 : 0 :

10 : 1

f1-score precision recall support

AFIB 0.722593 0.729154 0.716521 204.0  
GSVT 0.746476 0.741964 0.751238 300.0  
SB 0.762093 0.761071 0.763118 892.0  
SR 0.755041 0.756607 0.753487 681.0  
macro avg 0.746551 0.747199 0.746091 2077.0  
micro avg 0.753667 0.753667 0.753667 2077.0  
weighted avg 0.753645 0.753713 0.753667 2077.0

The result of Model Number:Dataset Number:Featuregroup Number:Rescale of 53 : 1 : 0 :

0

f1-score precision recall support

AFIB 0.904569 0.921164 0.888632 204.0  
GSVT 0.916500 0.907251 0.925958 300.0  
SB 0.939075 0.934187 0.944021 892.0  
SR 0.926291 0.932095 0.920579 681.0  
macro avg 0.921609 0.923674 0.919797 2077.0  
micro avg 0.928286 0.928286 0.928286 2077.0  
weighted avg 0.928234 0.928331 0.928286 2077.0

The result of Model Number:Dataset Number:Featuregroup Number:Rescale of 53 : 1 : 0 :

1

f1-score precision recall support

AFIB 0.798330 0.806052 0.790898 204.0  
GSVT 0.826579 0.824949 0.828228 300.0  
SB 0.843856 0.842361 0.845367 892.0  
SR 0.836076 0.836481 0.835708 681.0  
macro avg 0.826210 0.827461 0.825050 2077.0  
micro avg 0.834375 0.834375 0.834375 2077.0  
weighted avg 0.834338 0.834352 0.834375 2077.0

The result of Model Number:Dataset Number:Featuregroup Number:Rescale of 53 : 1 : 1 :

0

f1-score precision recall support

AFIB 0.696349 0.766604 0.638297 204.0  
GSVT 0.821199 0.809864 0.832987 300.0  
SB 0.871954 0.869045 0.874886 892.0  
SR 0.849624 0.837870 0.861724 681.0  
macro avg 0.809781 0.820845 0.801974 2077.0  
micro avg 0.841281 0.841281 0.841281 2077.0  
weighted avg 0.840054 0.840213 0.841281 2077.0



The result of Model Number:Dataset Number:Featuregroup Number:Rescale of 53 : 1 : 1 :  
1

|              | f1-score | precision | recall   | support |
|--------------|----------|-----------|----------|---------|
| AFIB         | 0.879500 | 0.918098  | 0.844237 | 204.0   |
| GSVT         | 0.818757 | 0.824652  | 0.813282 | 300.0   |
| SB           | 0.849116 | 0.806476  | 0.896520 | 892.0   |
| SR           | 0.753299 | 0.803035  | 0.709523 | 681.0   |
| macro avg    | 0.825168 | 0.838065  | 0.815891 | 2077.0  |
| micro avg    | 0.818050 | 0.818050  | 0.818050 | 2077.0  |
| weighted avg | 0.816299 | 0.818936  | 0.818050 | 2077.0  |

The result of Model Number:Dataset Number:Featuregroup Number:Rescale of 53 : 1 : 2 :  
0

|              | f1-score | precision | recall   | support |
|--------------|----------|-----------|----------|---------|
| AFIB         | 0.901802 | 0.914568  | 0.890127 | 204.0   |
| GSVT         | 0.920525 | 0.903576  | 0.938290 | 300.0   |
| SB           | 0.940144 | 0.929750  | 0.950790 | 892.0   |
| SR           | 0.920386 | 0.939132  | 0.902429 | 681.0   |
| macro avg    | 0.920714 | 0.921756  | 0.920409 | 2077.0  |
| micro avg    | 0.927170 | 0.927170  | 0.927170 | 2077.0  |
| weighted avg | 0.927066 | 0.927554  | 0.927170 | 2077.0  |

The result of Model Number:Dataset Number:Featuregroup Number:Rescale of 53 : 1 : 2 :  
1

|              | f1-score | precision | recall   | support |
|--------------|----------|-----------|----------|---------|
| AFIB         | 0.676804 | 0.725724  | 0.634529 | 204.0   |
| GSVT         | 0.641074 | 0.644542  | 0.637906 | 300.0   |
| SB           | 0.669614 | 0.629462  | 0.715254 | 892.0   |
| SR           | 0.587972 | 0.634554  | 0.547836 | 681.0   |
| macro avg    | 0.643866 | 0.658570  | 0.633881 | 2077.0  |
| micro avg    | 0.641261 | 0.641261  | 0.641261 | 2077.0  |
| weighted avg | 0.639429 | 0.642764  | 0.641261 | 2077.0  |

The result of Model Number:Dataset Number:Featuregroup Number:Rescale of 53 : 1 : 3 :  
0

|              | f1-score | precision | recall   | support |
|--------------|----------|-----------|----------|---------|
| AFIB         | 0.653439 | 0.652388  | 0.654761 | 875.0   |
| GSVT         | 0.668675 | 0.665189  | 0.672236 | 691.0   |
| SB           | 0.699134 | 0.693211  | 0.705165 | 1553.0  |
| SR           | 0.672446 | 0.687395  | 0.658359 | 907.0   |
| macro avg    | 0.673424 | 0.674546  | 0.672630 | 4026.0  |
| micro avg    | 0.678014 | 0.678014  | 0.678014 | 4026.0  |
| weighted avg | 0.677963 | 0.678219  | 0.678014 | 4026.0  |

The result of Model Number:Dataset Number:Featuregroup Number:Rescale of 53 : 1 : 3 :  
1

|      | f1-score | precision | recall   | support |
|------|----------|-----------|----------|---------|
| AFIB | 0.766780 | 0.780577  | 0.753689 | 204.0   |

GSVT 0.784079 0.773054 0.795552 300.0  
SB 0.796143 0.786736 0.805781 892.0  
SR 0.780131 0.794020 0.766728 681.0  
macro avg 0.781783 0.783597 0.780438 2077.0  
micro avg 0.786383 0.786383 0.786383 2077.0  
weighted avg 0.786267 0.786543 0.786383 2077.0  
The result of Model Number:Dataset Number:Featuregroup Number:Rescale of 53 : 1 : 4 :  
0

f1-score precision recall support  
AFIB 0.715056 0.716500 0.713633 204.0  
GSVT 0.734949 0.732764 0.737151 300.0  
SB 0.747127 0.746461 0.747797 892.0  
SR 0.740705 0.742128 0.739298 681.0  
macro avg 0.734459 0.734463 0.734470 2077.0  
micro avg 0.740117 0.740117 0.740117 2077.0  
weighted avg 0.740113 0.740119 0.740117 2077.0  
The result of Model Number:Dataset Number:Featuregroup Number:Rescale of 53 : 1 : 4 :  
1

f1-score precision recall support  
AFIB 0.765288 0.771466 0.759274 204.0  
GSVT 0.782848 0.779010 0.786752 300.0  
SB 0.798127 0.797242 0.799021 892.0  
SR 0.792167 0.793221 0.791122 681.0  
macro avg 0.784608 0.785235 0.784042 2077.0  
micro avg 0.790755 0.790755 0.790755 2077.0  
weighted avg 0.790741 0.790758 0.790755 2077.0  
The result of Model Number:Dataset Number:Featuregroup Number:Rescale of 53 : 1 : 5 :  
0

f1-score precision recall support  
AFIB 0.654746 0.651450 0.658106 875.0  
GSVT 0.667500 0.670731 0.664310 691.0  
SB 0.710928 0.709292 0.712574 1553.0  
SR 0.693130 0.696839 0.689468 907.0  
macro avg 0.681576 0.682078 0.681114 4026.0  
micro avg 0.687247 0.687247 0.687247 4026.0  
weighted avg 0.687254 0.687297 0.687247 4026.0  
The result of Model Number:Dataset Number:Featuregroup Number:Rescale of 53 : 1 : 5 :  
1

f1-score precision recall support  
AFIB 0.770425 0.775926 0.765139 204.0  
GSVT 0.797364 0.796850 0.797894 300.0  
SB 0.813318 0.811513 0.815139 892.0  
SR 0.806048 0.807023 0.805100 681.0  
macro avg 0.796789 0.797828 0.795818 2077.0

micro avg 0.804445 0.804445 0.804445 2077.0  
weighted avg 0.804417 0.804428 0.804445 2077.0  
The result of Model Number:Dataset Number:Featuregroup Number:Rescale of 53 : 1 : 6 :  
0

|              | f1-score | precision | recall   | support |
|--------------|----------|-----------|----------|---------|
| AFIB         | 0.847966 | 0.856169  | 0.840073 | 204.0   |
| GSVT         | 0.877972 | 0.876241  | 0.879724 | 300.0   |
| SB           | 0.896323 | 0.894735  | 0.897928 | 892.0   |
| SR           | 0.888060 | 0.888490  | 0.887668 | 681.0   |
| macro avg    | 0.877580 | 0.878909  | 0.876348 | 2077.0  |
| micro avg    | 0.886252 | 0.886252  | 0.886252 | 2077.0  |
| weighted avg | 0.886214 | 0.886228  | 0.886252 | 2077.0  |

The result of Model Number:Dataset Number:Featuregroup Number:Rescale of 53 : 1 : 6 :  
1

|              | f1-score | precision | recall   | support |
|--------------|----------|-----------|----------|---------|
| AFIB         | 0.618188 | 0.689472  | 0.560345 | 204.0   |
| GSVT         | 0.728907 | 0.716220  | 0.742207 | 300.0   |
| SB           | 0.778248 | 0.774798  | 0.781736 | 892.0   |
| SR           | 0.760187 | 0.749793  | 0.770897 | 681.0   |
| macro avg    | 0.721382 | 0.732571  | 0.713796 | 2077.0  |
| micro avg    | 0.750728 | 0.750728  | 0.750728 | 2077.0  |
| weighted avg | 0.749478 | 0.749758  | 0.750728 | 2077.0  |

The result of Model Number:Dataset Number:Featuregroup Number:Rescale of 53 : 1 : 7 :  
0

|              | f1-score | precision | recall   | support |
|--------------|----------|-----------|----------|---------|
| AFIB         | 0.683138 | 0.697083  | 0.670041 | 204.0   |
| GSVT         | 0.707944 | 0.701793  | 0.714332 | 300.0   |
| SB           | 0.721555 | 0.720267  | 0.722849 | 892.0   |
| SR           | 0.714839 | 0.715265  | 0.714417 | 681.0   |
| macro avg    | 0.706869 | 0.708602  | 0.705410 | 2077.0  |
| micro avg    | 0.713668 | 0.713668  | 0.713668 | 2077.0  |
| weighted avg | 0.713614 | 0.713681  | 0.713668 | 2077.0  |

The result of Model Number:Dataset Number:Featuregroup Number:Rescale of 53 : 1 : 7 :  
1

|              | f1-score | precision | recall   | support |
|--------------|----------|-----------|----------|---------|
| AFIB         | 0.699883 | 0.707499  | 0.692634 | 204.0   |
| GSVT         | 0.723568 | 0.720551  | 0.726728 | 300.0   |
| SB           | 0.738396 | 0.737735  | 0.739058 | 892.0   |
| SR           | 0.731417 | 0.731424  | 0.731418 | 681.0   |
| macro avg    | 0.723316 | 0.724302  | 0.722459 | 2077.0  |
| micro avg    | 0.730212 | 0.730212  | 0.730212 | 2077.0  |
| weighted avg | 0.730183 | 0.730214  | 0.730212 | 2077.0  |

The result of Model Number:Dataset Number:Featuregroup Number:Rescale of 53 : 1 : 8 :  
0

f1-score precision recall support  
AFIB 0.664649 0.689958 0.641275 204.0  
GSVT 0.685824 0.678912 0.692909 300.0  
SB 0.699552 0.696069 0.703079 892.0  
SR 0.691102 0.691537 0.690690 681.0  
macro avg 0.685282 0.689119 0.681988 2077.0  
micro avg 0.691478 0.691478 0.691478 2077.0  
weighted avg 0.691370 0.691505 0.691478 2077.0  
The result of Model Number:Dataset Number:Featuregroup Number:Rescale of 53 : 1 : 8 :  
1

f1-score precision recall support  
AFIB 0.813383 0.818251 0.808614 204.0  
GSVT 0.835050 0.832568 0.837553 300.0  
SB 0.847838 0.846799 0.848882 892.0  
SR 0.841657 0.842650 0.840673 681.0  
macro avg 0.834482 0.835067 0.833930 2077.0  
micro avg 0.840599 0.840599 0.840599 2077.0  
weighted avg 0.840580 0.840579 0.840599 2077.0  
The result of Model Number:Dataset Number:Featuregroup Number:Rescale of 53 : 1 : 9 :  
0

f1-score precision recall support  
AFIB 0.676819 0.689273 0.665150 204.0  
GSVT 0.701790 0.695912 0.707889 300.0  
SB 0.714967 0.713769 0.716170 892.0  
SR 0.708655 0.709284 0.708030 681.0  
macro avg 0.700558 0.702060 0.699310 2077.0  
micro avg 0.707294 0.707294 0.707294 2077.0  
weighted avg 0.707247 0.707314 0.707294 2077.0  
The result of Model Number:Dataset Number:Featuregroup Number:Rescale of 53 : 1 : 9 :  
1

f1-score precision recall support  
AFIB 0.686119 0.758667 0.626591 204.0  
GSVT 0.789469 0.780333 0.798973 300.0  
SB 0.834689 0.831257 0.838151 892.0  
SR 0.816764 0.804666 0.829240 681.0  
macro avg 0.781760 0.793731 0.773239 2077.0  
micro avg 0.808792 0.808792 0.808792 2077.0  
weighted avg 0.807688 0.808053 0.808792 2077.0  
The result of Model Number:Dataset Number:Featuregroup Number:Rescale of 53 : 1 :  
10 : 0

f1-score precision recall support  
AFIB 0.771072 0.773029 0.769152 875.0  
GSVT 0.784678 0.776179 0.793399 691.0  
SB 0.827008 0.817653 0.836592 1553.0

SR 0.789196 0.810802 0.768743 907.0  
macro avg 0.792989 0.794416 0.791972 4026.0  
micro avg 0.799236 0.799236 0.799236 4026.0  
weighted avg 0.799067 0.799293 0.799236 4026.0  
The result of Model Number:Dataset Number:Featuregroup Number:Rescale of 53 : 1 :  
10 : 1

f1-score precision recall support  
AFIB 0.740576 0.780862 0.704433 204.0  
GSVT 0.777468 0.765710 0.789625 300.0  
SB 0.795944 0.790766 0.801202 892.0  
SR 0.786124 0.786833 0.785435 681.0  
macro avg 0.775028 0.781043 0.770174 2077.0  
micro avg 0.784856 0.784856 0.784856 2077.0  
weighted avg 0.784618 0.784885 0.784856 2077.0

The result of Model Number:Dataset Number:Featuregroup Number:Rescale of 54 : 0 : 0 :  
0

f1-score precision recall support  
AFIB 0.868609 0.906229 0.834235 204.0  
GSVT 0.811999 0.819576 0.804967 300.0  
SB 0.841696 0.800314 0.887650 892.0  
SR 0.750179 0.797521 0.708384 681.0  
macro avg 0.818121 0.830910 0.808809 2077.0  
micro avg 0.811684 0.811684 0.811684 2077.0  
weighted avg 0.810043 0.812583 0.811684 2077.0

The result of Model Number:Dataset Number:Featuregroup Number:Rescale of 54 : 0 : 0 :  
1

f1-score precision recall support  
AFIB 0.879585 0.870738 0.888639 875.0  
GSVT 0.887456 0.895358 0.879758 691.0  
SB 0.938890 0.936008 0.941791 1553.0  
SR 0.920708 0.928768 0.912791 907.0  
macro avg 0.906660 0.907718 0.905745 4026.0  
micro avg 0.913059 0.913059 0.913059 4026.0  
weighted avg 0.913077 0.913214 0.913059 4026.0

The result of Model Number:Dataset Number:Featuregroup Number:Rescale of 54 : 0 : 1 :  
0

f1-score precision recall support  
AFIB 0.782559 0.752642 0.831785 875.0  
GSVT 0.810864 0.782879 0.848822 691.0  
SB 0.903453 0.887506 0.920976 1553.0  
SR 0.765204 0.920114 0.660650 907.0  
macro avg 0.815520 0.835785 0.815558 4026.0  
micro avg 0.830560 0.830560 0.830560 4026.0  
weighted avg 0.830141 0.847583 0.830560 4026.0

The result of Model Number:Dataset Number:Featuregroup Number:Rescale of 54 : 0 : 1 : 1

|              | f1-score | precision | recall   | support |
|--------------|----------|-----------|----------|---------|
| AFIB         | 0.873174 | 0.881679  | 0.865043 | 204.0   |
| GSVT         | 0.893366 | 0.889264  | 0.897536 | 300.0   |
| SB           | 0.905711 | 0.902595  | 0.908856 | 892.0   |
| SR           | 0.898062 | 0.901547  | 0.894648 | 681.0   |
| macro avg    | 0.892578 | 0.893771  | 0.891521 | 2077.0  |
| micro avg    | 0.898259 | 0.898259  | 0.898259 | 2077.0  |
| weighted avg | 0.898224 | 0.898271  | 0.898259 | 2077.0  |

The result of Model Number:Dataset Number:Featuregroup Number:Rescale of 54 : 0 : 2 : 0

|              | f1-score | precision | recall   | support |
|--------------|----------|-----------|----------|---------|
| AFIB         | 0.657927 | 0.663781  | 0.652211 | 875.0   |
| GSVT         | 0.671737 | 0.664365  | 0.679317 | 691.0   |
| SB           | 0.722449 | 0.716824  | 0.728169 | 1553.0  |
| SR           | 0.698441 | 0.708341  | 0.688817 | 907.0   |
| macro avg    | 0.687638 | 0.688328  | 0.687128 | 4026.0  |
| micro avg    | 0.694410 | 0.694410  | 0.694410 | 4026.0  |
| weighted avg | 0.694313 | 0.694381  | 0.694410 | 4026.0  |

The result of Model Number:Dataset Number:Featuregroup Number:Rescale of 54 : 0 : 2 : 1

|              | f1-score | precision | recall   | support |
|--------------|----------|-----------|----------|---------|
| AFIB         | 0.834132 | 0.850865  | 0.818210 | 204.0   |
| GSVT         | 0.853463 | 0.844592  | 0.862568 | 300.0   |
| SB           | 0.869247 | 0.865866  | 0.872658 | 892.0   |
| SR           | 0.860113 | 0.863702  | 0.856574 | 681.0   |
| macro avg    | 0.854239 | 0.856256  | 0.852502 | 2077.0  |
| micro avg    | 0.860579 | 0.860579  | 0.860579 | 2077.0  |
| weighted avg | 0.860524 | 0.860610  | 0.860579 | 2077.0  |

The result of Model Number:Dataset Number:Featuregroup Number:Rescale of 54 : 0 : 3 : 0

|              | f1-score | precision | recall   | support |
|--------------|----------|-----------|----------|---------|
| AFIB         | 0.877197 | 0.922515  | 0.836383 | 204.0   |
| GSVT         | 0.919816 | 0.910825  | 0.929006 | 300.0   |
| SB           | 0.936034 | 0.928504  | 0.943693 | 892.0   |
| SR           | 0.924473 | 0.925598  | 0.923388 | 681.0   |
| macro avg    | 0.914380 | 0.921861  | 0.908117 | 2077.0  |
| micro avg    | 0.924374 | 0.924374  | 0.924374 | 2077.0  |
| weighted avg | 0.924122 | 0.924409  | 0.924374 | 2077.0  |

The result of Model Number:Dataset Number:Featuregroup Number:Rescale of 54 : 0 : 3 : 1

|      | f1-score | precision | recall   | support |
|------|----------|-----------|----------|---------|
| AFIB | 0.904581 | 0.914424  | 0.895211 | 204.0   |

GSVT 0.935193 0.931293 0.939278 300.0  
SB 0.954357 0.953503 0.955213 892.0  
SR 0.945338 0.945346 0.945338 681.0  
macro avg 0.934867 0.936142 0.933760 2077.0  
micro avg 0.943780 0.943780 0.943780 2077.0  
weighted avg 0.943743 0.943782 0.943780 2077.0  
The result of Model Number:Dataset Number:Featuregroup Number:Rescale of 54 : 0 : 4 :  
0

f1-score precision recall support

AFIB 0.841075 0.876647 0.808557 204.0  
GSVT 0.774569 0.775925 0.784836 300.0  
SB 0.833895 0.794169 0.878613 892.0  
SR 0.737204 0.796580 0.687399 681.0  
macro avg 0.796686 0.810830 0.789851 2077.0  
micro avg 0.795493 0.795493 0.795493 2077.0  
weighted avg 0.794328 0.800425 0.795493 2077.0  
The result of Model Number:Dataset Number:Featuregroup Number:Rescale of 54 : 0 : 4 :  
1

f1-score precision recall support

AFIB 0.756983 0.764357 0.749935 204.0  
GSVT 0.774488 0.770932 0.778104 300.0  
SB 0.785191 0.782490 0.787917 892.0  
SR 0.778560 0.781581 0.775600 681.0  
macro avg 0.773806 0.774840 0.772889 2077.0  
micro avg 0.778730 0.778730 0.778730 2077.0  
weighted avg 0.778700 0.778741 0.778730 2077.0  
The result of Model Number:Dataset Number:Featuregroup Number:Rescale of 54 : 0 : 5 :  
0

f1-score precision recall support

AFIB 0.607113 0.630704 0.585266 875.0  
GSVT 0.652666 0.647846 0.657644 691.0  
SB 0.717230 0.713534 0.720968 1553.0  
SR 0.674978 0.662107 0.688433 907.0  
macro avg 0.662997 0.663548 0.663078 4026.0  
micro avg 0.673277 0.673277 0.673277 4026.0  
weighted avg 0.672697 0.672672 0.673277 4026.0  
The result of Model Number:Dataset Number:Featuregroup Number:Rescale of 54 : 0 : 5 :  
1

f1-score precision recall support

AFIB 0.747012 0.735296 0.759189 875.0  
GSVT 0.719795 0.740431 0.700363 691.0  
SB 0.756385 0.718044 0.799096 1553.0  
SR 0.614559 0.683879 0.558094 907.0  
macro avg 0.709438 0.719412 0.704186 4026.0

micro avg 0.719183 0.719183 0.719183 4026.0  
weighted avg 0.716117 0.717939 0.719183 4026.0  
The result of Model Number:Dataset Number:Featuregroup Number:Rescale of 54 : 0 : 6 :  
0

|              | f1-score | precision | recall   | support |
|--------------|----------|-----------|----------|---------|
| AFIB         | 0.631393 | 0.634705  | 0.628153 | 875.0   |
| GSVT         | 0.644595 | 0.643437  | 0.645803 | 691.0   |
| SB           | 0.699920 | 0.694552  | 0.705373 | 1553.0  |
| SR           | 0.675226 | 0.681985  | 0.668604 | 907.0   |
| macro avg    | 0.662784 | 0.663670  | 0.661983 | 4026.0  |
| micro avg    | 0.670083 | 0.670083  | 0.670083 | 4026.0  |
| weighted avg | 0.669968 | 0.669941  | 0.670083 | 4026.0  |

The result of Model Number:Dataset Number:Featuregroup Number:Rescale of 54 : 0 : 6 :  
1

|              | f1-score | precision | recall   | support |
|--------------|----------|-----------|----------|---------|
| AFIB         | 0.767682 | 0.779453  | 0.756388 | 204.0   |
| GSVT         | 0.785885 | 0.779217  | 0.792701 | 300.0   |
| SB           | 0.799556 | 0.796976  | 0.802155 | 892.0   |
| SR           | 0.791340 | 0.794277  | 0.788434 | 681.0   |
| macro avg    | 0.786116 | 0.787481  | 0.784919 | 2077.0  |
| micro avg    | 0.791795 | 0.791795  | 0.791795 | 2077.0  |
| weighted avg | 0.791757 | 0.791805  | 0.791795 | 2077.0  |

The result of Model Number:Dataset Number:Featuregroup Number:Rescale of 54 : 0 : 7 :  
0

|              | f1-score | precision | recall   | support |
|--------------|----------|-----------|----------|---------|
| AFIB         | 0.669735 | 0.663812  | 0.675793 | 875.0   |
| GSVT         | 0.608905 | 0.589679  | 0.677419 | 691.0   |
| SB           | 0.548961 | 0.527079  | 0.583182 | 1553.0  |
| SR           | 0.565784 | 0.571639  | 0.560085 | 907.0   |
| macro avg    | 0.598347 | 0.588052  | 0.624120 | 4026.0  |
| micro avg    | 0.614281 | 0.614281  | 0.614281 | 4026.0  |
| weighted avg | 0.589288 | 0.577579  | 0.614281 | 4026.0  |

The result of Model Number:Dataset Number:Featuregroup Number:Rescale of 54 : 0 : 7 :  
1

|              | f1-score | precision | recall   | support |
|--------------|----------|-----------|----------|---------|
| AFIB         | 0.862414 | 0.868964  | 0.856035 | 204.0   |
| GSVT         | 0.880070 | 0.871474  | 0.888856 | 300.0   |
| SB           | 0.900598 | 0.898296  | 0.902920 | 892.0   |
| SR           | 0.891045 | 0.896079  | 0.886079 | 681.0   |
| macro avg    | 0.883532 | 0.883703  | 0.883472 | 2077.0  |
| micro avg    | 0.890762 | 0.890762  | 0.890762 | 2077.0  |
| weighted avg | 0.890751 | 0.890814  | 0.890762 | 2077.0  |

The result of Model Number:Dataset Number:Featuregroup Number:Rescale of 54 : 0 : 8 :  
0



f1-score precision recall support  
AFIB 0.683921 0.686274 0.681670 875.0  
GSVT 0.696905 0.683001 0.711513 691.0  
SB 0.737730 0.733740 0.741767 1553.0  
SR 0.709196 0.725685 0.693481 907.0  
macro avg 0.706938 0.707175 0.707108 4026.0  
micro avg 0.712635 0.712635 0.712635 4026.0  
weighted avg 0.712600 0.712901 0.712635 4026.0  
The result of Model Number:Dataset Number:Featuregroup Number:Rescale of 54 : 0 : 8 :  
1

f1-score precision recall support  
AFIB 0.746584 0.764499 0.729828 204.0  
GSVT 0.773130 0.768649 0.777757 300.0  
SB 0.789642 0.786745 0.792562 892.0  
SR 0.782780 0.783360 0.782209 681.0  
macro avg 0.773034 0.775813 0.770589 2077.0  
micro avg 0.780868 0.780868 0.780868 2077.0  
weighted avg 0.780778 0.780837 0.780868 2077.0  
The result of Model Number:Dataset Number:Featuregroup Number:Rescale of 54 : 0 : 9 :  
0

f1-score precision recall support  
AFIB 0.844316 0.849369 0.839365 204.0  
GSVT 0.866808 0.864231 0.869406 300.0  
SB 0.880081 0.879003 0.881165 892.0  
SR 0.873666 0.874696 0.872644 681.0  
macro avg 0.866218 0.866825 0.865645 2077.0  
micro avg 0.872567 0.872567 0.872567 2077.0  
weighted avg 0.872548 0.872547 0.872567 2077.0  
The result of Model Number:Dataset Number:Featuregroup Number:Rescale of 54 : 0 : 9 :  
1

f1-score precision recall support  
AFIB 0.587680 0.583979 0.661980 204.0  
GSVT 0.716391 0.712706 0.720235 300.0  
SB 0.736789 0.733283 0.740336 892.0  
SR 0.577928 0.579832 0.576385 681.0  
macro avg 0.654697 0.652450 0.674734 2077.0  
micro avg 0.675981 0.675981 0.675981 2077.0  
weighted avg 0.667111 0.665334 0.675981 2077.0  
The result of Model Number:Dataset Number:Featuregroup Number:Rescale of 54 : 0 :  
10 : 0

f1-score precision recall support  
AFIB 0.838040 0.830184 0.846154 875.0  
GSVT 0.794543 0.775445 0.852951 691.0  
SB 0.918740 0.915366 0.922164 1553.0

SR 0.714579 0.719591 0.709647 907.0  
macro avg 0.816476 0.810147 0.832729 4026.0  
micro avg 0.845888 0.845888 0.845888 4026.0  
weighted avg 0.833890 0.828732 0.845888 4026.0  
The result of Model Number:Dataset Number:Featuregroup Number:Rescale of 54 : 0 :  
10 : 1

f1-score precision recall support  
AFIB 0.722316 0.742142 0.703576 204.0  
GSVT 0.738653 0.727305 0.750431 300.0  
SB 0.754882 0.747581 0.762329 892.0  
SR 0.735803 0.744998 0.726838 681.0  
macro avg 0.737914 0.740506 0.735794 2077.0  
micro avg 0.743203 0.743203 0.743203 2077.0  
weighted avg 0.743084 0.743271 0.743203 2077.0  
The result of Model Number:Dataset Number:Featuregroup Number:Rescale of 54 : 1 : 0 :  
0

f1-score precision recall support  
AFIB 0.653037 0.642582 0.734799 204.0  
GSVT 0.764534 0.755663 0.773895 300.0  
SB 0.790133 0.787149 0.793145 892.0  
SR 0.619953 0.623158 0.616886 681.0  
macro avg 0.706914 0.702138 0.729681 2077.0  
micro avg 0.726842 0.726842 0.726842 2077.0  
weighted avg 0.717172 0.714633 0.726842 2077.0  
The result of Model Number:Dataset Number:Featuregroup Number:Rescale of 54 : 1 : 0 :  
1

f1-score precision recall support  
AFIB 0.646151 0.638113 0.654466 875.0  
GSVT 0.666381 0.674725 0.658306 691.0  
SB 0.710935 0.710165 0.711712 1553.0  
SR 0.691760 0.695307 0.688252 907.0  
macro avg 0.678807 0.679578 0.678184 4026.0  
micro avg 0.684819 0.684819 0.684819 4026.0  
weighted avg 0.684888 0.685075 0.684819 4026.0  
The result of Model Number:Dataset Number:Featuregroup Number:Rescale of 54 : 1 : 1 :  
0

f1-score precision recall support  
AFIB 0.182599 0.184517 0.180721 175.0  
GSVT 0.182893 0.180950 0.184878 138.2  
SB 0.192619 0.191880 0.193363 310.6  
SR 0.188161 0.189104 0.187228 181.4  
macro avg 0.186568 0.186613 0.186547 805.2  
micro avg 0.187777 0.187777 0.187777 805.2  
weighted avg 0.187768 0.187779 0.187777 805.2

The result of Model Number:Dataset Number:Featuregroup Number:Rescale of 54 : 1 : 1 : 1

|              | f1-score | precision | recall   | support |
|--------------|----------|-----------|----------|---------|
| AFIB         | 0.693247 | 0.679437  | 0.707666 | 875.0   |
| GSVT         | 0.564242 | 0.524715  | 0.707261 | 691.0   |
| SB           | 0.457820 | 0.458609  | 0.457034 | 1553.0  |
| SR           | 0.742185 | 0.748720  | 0.735794 | 907.0   |
| macro avg    | 0.614373 | 0.602870  | 0.651939 | 4026.0  |
| micro avg    | 0.617254 | 0.617254  | 0.617254 | 4026.0  |
| weighted avg | 0.591316 | 0.583307  | 0.617254 | 4026.0  |

The result of Model Number:Dataset Number:Featuregroup Number:Rescale of 54 : 1 : 2 : 0

|              | f1-score | precision | recall   | support |
|--------------|----------|-----------|----------|---------|
| AFIB         | 0.825591 | 0.817939  | 0.833433 | 875.0   |
| GSVT         | 0.840417 | 0.844981  | 0.835916 | 691.0   |
| SB           | 0.890470 | 0.888417  | 0.892533 | 1553.0  |
| SR           | 0.869723 | 0.877749  | 0.861870 | 907.0   |
| macro avg    | 0.856550 | 0.857272  | 0.855938 | 4026.0  |
| micro avg    | 0.863063 | 0.863063  | 0.863063 | 4026.0  |
| weighted avg | 0.863105 | 0.863241  | 0.863063 | 4026.0  |

The result of Model Number:Dataset Number:Featuregroup Number:Rescale of 54 : 1 : 2 : 1

|              | f1-score | precision | recall   | support |
|--------------|----------|-----------|----------|---------|
| AFIB         | 0.839881 | 0.853190  | 0.827092 | 204.0   |
| GSVT         | 0.861469 | 0.854138  | 0.868932 | 300.0   |
| SB           | 0.876343 | 0.874390  | 0.878308 | 892.0   |
| SR           | 0.868039 | 0.869969  | 0.866135 | 681.0   |
| macro avg    | 0.861433 | 0.862922  | 0.860117 | 2077.0  |
| micro avg    | 0.867932 | 0.867932  | 0.867932 | 2077.0  |
| weighted avg | 0.867891 | 0.867933  | 0.867932 | 2077.0  |

The result of Model Number:Dataset Number:Featuregroup Number:Rescale of 54 : 1 : 3 : 0

|              | f1-score | precision | recall   | support |
|--------------|----------|-----------|----------|---------|
| AFIB         | 0.763037 | 0.762350  | 0.763799 | 875.0   |
| GSVT         | 0.776256 | 0.769149  | 0.783557 | 691.0   |
| SB           | 0.814588 | 0.807426  | 0.821879 | 1553.0  |
| SR           | 0.776238 | 0.795428  | 0.758020 | 907.0   |
| macro avg    | 0.782530 | 0.783588  | 0.781814 | 4026.0  |
| micro avg    | 0.788292 | 0.788292  | 0.788292 | 4026.0  |
| weighted avg | 0.788166 | 0.788357  | 0.788292 | 4026.0  |

The result of Model Number:Dataset Number:Featuregroup Number:Rescale of 54 : 1 : 3 : 1

|      | f1-score | precision | recall   | support |
|------|----------|-----------|----------|---------|
| AFIB | 0.804307 | 0.840054  | 0.771590 | 204.0   |

GSVT 0.837824 0.831247 0.844525 300.0  
SB 0.850622 0.844060 0.857295 892.0  
SR 0.841211 0.842600 0.839856 681.0  
macro avg 0.833491 0.839490 0.828316 2077.0  
micro avg 0.841315 0.841315 0.841315 2077.0  
weighted avg 0.841139 0.841337 0.841315 2077.0  
The result of Model Number:Dataset Number:Featuregroup Number:Rescale of 54 : 1 : 4 :  
0

f1-score precision recall support  
AFIB 0.767269 0.781351 0.754056 204.0  
GSVT 0.796396 0.789993 0.803050 300.0  
SB 0.811169 0.809721 0.812624 892.0  
SR 0.803138 0.803853 0.802428 681.0  
macro avg 0.794493 0.796229 0.793040 2077.0  
micro avg 0.802146 0.802146 0.802146 2077.0  
weighted avg 0.802090 0.802161 0.802146 2077.0  
The result of Model Number:Dataset Number:Featuregroup Number:Rescale of 54 : 1 : 4 :  
1

f1-score precision recall support  
AFIB 0.660890 0.674381 0.648220 204.0  
GSVT 0.684888 0.678937 0.691068 300.0  
SB 0.698055 0.696809 0.699308 892.0  
SR 0.691558 0.691970 0.691150 681.0  
macro avg 0.683848 0.685524 0.682436 2077.0  
micro avg 0.690425 0.690425 0.690425 2077.0  
weighted avg 0.690373 0.690438 0.690425 2077.0  
The result of Model Number:Dataset Number:Featuregroup Number:Rescale of 54 : 1 : 5 :  
0

f1-score precision recall support  
AFIB 0.842154 0.850329 0.834655 204.0  
GSVT 0.867398 0.863298 0.871766 300.0  
SB 0.884963 0.883975 0.885954 892.0  
SR 0.877176 0.878085 0.876274 681.0  
macro avg 0.867922 0.868922 0.867162 2077.0  
micro avg 0.875693 0.875693 0.875693 2077.0  
weighted avg 0.875668 0.875752 0.875693 2077.0  
The result of Model Number:Dataset Number:Featuregroup Number:Rescale of 54 : 1 : 5 :  
1

f1-score precision recall support  
AFIB 0.811526 0.811743 0.811451 875.0  
GSVT 0.825658 0.822609 0.828832 691.0  
SB 0.883292 0.881148 0.885451 1553.0  
SR 0.862227 0.868415 0.856150 907.0  
macro avg 0.845676 0.845979 0.845471 4026.0

micro avg 0.853049 0.853049 0.853049 4026.0  
weighted avg 0.853057 0.853148 0.853049 4026.0  
The result of Model Number:Dataset Number:Featuregroup Number:Rescale of 54 : 1 : 6 :  
0

|              | f1-score | precision | recall   | support |
|--------------|----------|-----------|----------|---------|
| AFIB         | 0.784962 | 0.780567  | 0.789444 | 875.0   |
| GSVT         | 0.791354 | 0.796023  | 0.786788 | 691.0   |
| SB           | 0.833626 | 0.831017  | 0.836254 | 1553.0  |
| SR           | 0.817123 | 0.822529  | 0.811806 | 907.0   |
| macro avg    | 0.806766 | 0.807534  | 0.806073 | 4026.0  |
| micro avg    | 0.812083 | 0.812083  | 0.812083 | 4026.0  |
| weighted avg | 0.812076 | 0.812134  | 0.812083 | 4026.0  |

The result of Model Number:Dataset Number:Featuregroup Number:Rescale of 54 : 1 : 6 :  
1

|              | f1-score | precision | recall   | support |
|--------------|----------|-----------|----------|---------|
| AFIB         | 0.668614 | 0.740835  | 0.609346 | 204.0   |
| GSVT         | 0.775067 | 0.762461  | 0.788218 | 300.0   |
| SB           | 0.826561 | 0.822798  | 0.830360 | 892.0   |
| SR           | 0.806589 | 0.796325  | 0.817133 | 681.0   |
| macro avg    | 0.769208 | 0.780605  | 0.761264 | 2077.0  |
| micro avg    | 0.798228 | 0.798228  | 0.798228 | 2077.0  |
| weighted avg | 0.797061 | 0.797353  | 0.798228 | 2077.0  |

The result of Model Number:Dataset Number:Featuregroup Number:Rescale of 54 : 1 : 7 :  
0

|              | f1-score | precision | recall   | support |
|--------------|----------|-----------|----------|---------|
| AFIB         | 0.834378 | 0.847600  | 0.821673 | 204.0   |
| GSVT         | 0.855825 | 0.848542  | 0.863238 | 300.0   |
| SB           | 0.870600 | 0.868660  | 0.872553 | 892.0   |
| SR           | 0.862352 | 0.864269  | 0.860460 | 681.0   |
| macro avg    | 0.855789 | 0.857268  | 0.854481 | 2077.0  |
| micro avg    | 0.862245 | 0.862245  | 0.862245 | 2077.0  |
| weighted avg | 0.862204 | 0.862246  | 0.862245 | 2077.0  |

The result of Model Number:Dataset Number:Featuregroup Number:Rescale of 54 : 1 : 7 :  
1

|              | f1-score | precision | recall   | support |
|--------------|----------|-----------|----------|---------|
| AFIB         | 0.849648 | 0.842888  | 0.856596 | 875.0   |
| GSVT         | 0.815959 | 0.800445  | 0.832154 | 691.0   |
| SB           | 0.856378 | 0.790512  | 0.934233 | 1553.0  |
| SR           | 0.655748 | 0.838470  | 0.538536 | 907.0   |
| macro avg    | 0.794433 | 0.818079  | 0.790380 | 4026.0  |
| micro avg    | 0.810695 | 0.810695  | 0.810695 | 4026.0  |
| weighted avg | 0.802779 | 0.814404  | 0.810695 | 4026.0  |

The result of Model Number:Dataset Number:Featuregroup Number:Rescale of 54 : 1 : 8 :  
0

f1-score precision recall support  
AFIB 0.709830 0.740252 0.682079 204.0  
GSVT 0.733682 0.722597 0.745160 300.0  
SB 0.748235 0.740835 0.755786 892.0  
SR 0.727963 0.734191 0.721867 681.0  
macro avg 0.729927 0.734469 0.726223 2077.0  
micro avg 0.735890 0.735890 0.735890 2077.0  
weighted avg 0.735714 0.735965 0.735890 2077.0  
The result of Model Number:Dataset Number:Featuregroup Number:Rescale of 54 : 1 : 8 :  
1

f1-score precision recall support  
AFIB 0.786188 0.813481 0.760772 204.0  
GSVT 0.801262 0.792491 0.810329 300.0  
SB 0.822593 0.816686 0.828587 892.0  
SR 0.807902 0.811874 0.803982 681.0  
macro avg 0.804486 0.808633 0.800917 2077.0  
micro avg 0.811222 0.811222 0.811222 2077.0  
weighted avg 0.811119 0.811299 0.811222 2077.0  
The result of Model Number:Dataset Number:Featuregroup Number:Rescale of 54 : 1 : 9 :  
0

f1-score precision recall support  
AFIB 0.631104 0.683788 0.587215 204.0  
GSVT 0.676932 0.668420 0.685940 300.0  
SB 0.694214 0.684488 0.704300 892.0  
SR 0.675277 0.678440 0.672472 681.0  
macro avg 0.669382 0.678784 0.662482 2077.0  
micro avg 0.679713 0.679713 0.679713 2077.0  
weighted avg 0.679310 0.680115 0.679713 2077.0  
The result of Model Number:Dataset Number:Featuregroup Number:Rescale of 54 : 1 : 9 :  
1

f1-score precision recall support  
AFIB 0.757717 0.756109 0.759366 875.0  
GSVT 0.769555 0.765866 0.773344 691.0  
SB 0.809953 0.800284 0.819861 1553.0  
SR 0.772313 0.794193 0.751622 907.0  
macro avg 0.777384 0.779113 0.776048 4026.0  
micro avg 0.783356 0.783356 0.783356 4026.0  
weighted avg 0.783187 0.783404 0.783356 4026.0  
The result of Model Number:Dataset Number:Featuregroup Number:Rescale of 54 : 1 :  
10 : 0

f1-score precision recall support  
AFIB 0.707168 0.711049 0.703374 875.0  
GSVT 0.708157 0.699204 0.717453 691.0  
SB 0.744749 0.741761 0.747769 1553.0

SR 0.728762 0.737609 0.720170 907.0  
macro avg 0.722209 0.722406 0.722191 4026.0  
micro avg 0.726699 0.726699 0.726699 4026.0  
weighted avg 0.726699 0.726846 0.726699 4026.0  
The result of Model Number:Dataset Number:Featuregroup Number:Rescale of 54 : 1 :  
10 : 1

f1-score precision recall support  
AFIB 0.765957 0.758447 0.818961 204.0  
GSVT 0.686799 0.679162 0.694780 300.0  
SB 0.882579 0.876152 0.889107 892.0  
SR 0.867777 0.873787 0.861919 681.0  
macro avg 0.800778 0.796887 0.816192 2077.0  
micro avg 0.845235 0.845235 0.845235 2077.0  
weighted avg 0.837993 0.835363 0.845235 2077.0

The result of Model Number:Dataset Number:Featuregroup Number:Rescale of 55 : 0 : 0 :  
0

f1-score precision recall support  
AFIB 0.812753 0.829633 0.796733 875.0  
GSVT 0.792596 0.765067 0.857294 691.0  
SB 0.934198 0.929985 0.938464 1553.0  
SR 0.710222 0.698755 0.722135 907.0  
macro avg 0.812442 0.805860 0.828657 4026.0  
micro avg 0.844993 0.844993 0.844993 4026.0  
weighted avg 0.833041 0.827776 0.844993 4026.0

The result of Model Number:Dataset Number:Featuregroup Number:Rescale of 55 : 0 : 0 :  
1

f1-score precision recall support  
AFIB 0.800843 0.825509 0.777769 204.0  
GSVT 0.821274 0.811220 0.831670 300.0  
SB 0.843581 0.838569 0.848682 892.0  
SR 0.829362 0.833452 0.825344 681.0  
macro avg 0.823765 0.827188 0.820866 2077.0  
micro avg 0.831608 0.831608 0.831608 2077.0  
weighted avg 0.831499 0.831658 0.831608 2077.0

The result of Model Number:Dataset Number:Featuregroup Number:Rescale of 55 : 0 : 1 :  
0

f1-score precision recall support  
AFIB 0.877543 0.878166 0.876937 875.0  
GSVT 0.889368 0.891122 0.887697 691.0  
SB 0.944658 0.941519 0.947822 1553.0  
SR 0.922461 0.925890 0.919088 907.0  
macro avg 0.908508 0.909174 0.907886 4026.0  
micro avg 0.915623 0.915623 0.915623 4026.0  
weighted avg 0.915581 0.915579 0.915623 4026.0

The result of Model Number:Dataset Number:Featuregroup Number:Rescale of 55 : 0 : 1 :  
1

|              | f1-score | precision | recall   | support |
|--------------|----------|-----------|----------|---------|
| AFIB         | 0.801669 | 0.807279  | 0.796164 | 204.0   |
| GSVT         | 0.820320 | 0.816276  | 0.824417 | 300.0   |
| SB           | 0.836624 | 0.835232  | 0.838032 | 892.0   |
| SR           | 0.828298 | 0.830264  | 0.826351 | 681.0   |
| macro avg    | 0.821728 | 0.822263  | 0.821241 | 2077.0  |
| micro avg    | 0.828123 | 0.828123  | 0.828123 | 2077.0  |
| weighted avg | 0.828106 | 0.828120  | 0.828123 | 2077.0  |

The result of Model Number:Dataset Number:Featuregroup Number:Rescale of 55 : 0 : 2 :  
0

|              | f1-score | precision | recall   | support |
|--------------|----------|-----------|----------|---------|
| AFIB         | 0.851210 | 0.882768  | 0.821951 | 204.0   |
| GSVT         | 0.876710 | 0.865748  | 0.888065 | 300.0   |
| SB           | 0.898942 | 0.890739  | 0.907305 | 892.0   |
| SR           | 0.875308 | 0.882101  | 0.868628 | 681.0   |
| macro avg    | 0.875543 | 0.880339  | 0.871487 | 2077.0  |
| micro avg    | 0.883461 | 0.883461  | 0.883461 | 2077.0  |
| weighted avg | 0.883294 | 0.883515  | 0.883461 | 2077.0  |

The result of Model Number:Dataset Number:Featuregroup Number:Rescale of 55 : 0 : 2 :  
1

|              | f1-score | precision | recall   | support |
|--------------|----------|-----------|----------|---------|
| AFIB         | 0.882768 | 0.904246  | 0.862503 | 204.0   |
| GSVT         | 0.893864 | 0.881559  | 0.906637 | 300.0   |
| SB           | 0.911913 | 0.902807  | 0.921212 | 892.0   |
| SR           | 0.895992 | 0.907750  | 0.884560 | 681.0   |
| macro avg    | 0.896134 | 0.899091  | 0.893728 | 2077.0  |
| micro avg    | 0.901323 | 0.901323  | 0.901323 | 2077.0  |
| weighted avg | 0.901224 | 0.901500  | 0.901323 | 2077.0  |

The result of Model Number:Dataset Number:Featuregroup Number:Rescale of 55 : 0 : 3 :  
0

|              | f1-score | precision | recall   | support |
|--------------|----------|-----------|----------|---------|
| AFIB         | 0.713046 | 0.747280  | 0.681954 | 204.0   |
| GSVT         | 0.744061 | 0.737743  | 0.750509 | 300.0   |
| SB           | 0.755754 | 0.750250  | 0.761344 | 892.0   |
| SR           | 0.747804 | 0.748151  | 0.747480 | 681.0   |
| macro avg    | 0.740166 | 0.745856  | 0.735322 | 2077.0  |
| micro avg    | 0.747436 | 0.747436  | 0.747436 | 2077.0  |
| weighted avg | 0.747264 | 0.747464  | 0.747436 | 2077.0  |

The result of Model Number:Dataset Number:Featuregroup Number:Rescale of 55 : 0 : 3 :  
1

|      | f1-score | precision | recall   | support |
|------|----------|-----------|----------|---------|
| AFIB | 0.865682 | 0.887602  | 0.844898 | 204.0   |



GSVT 0.884482 0.874864 0.894461 300.0  
SB 0.909395 0.904856 0.913982 892.0  
SR 0.895299 0.899316 0.891354 681.0  
macro avg 0.888714 0.891660 0.886174 2077.0  
micro avg 0.896958 0.896958 0.896958 2077.0  
weighted avg 0.896881 0.897013 0.896958 2077.0  
The result of Model Number:Dataset Number:Featuregroup Number:Rescale of 55 : 0 : 4 :  
0

f1-score precision recall support  
AFIB 0.627910 0.684010 0.663086 204.0  
GSVT 0.852876 0.838934 0.867583 300.0  
SB 0.726061 0.720530 0.731730 892.0  
SR 0.887854 0.877808 0.898159 681.0  
macro avg 0.773675 0.780320 0.790140 2077.0  
micro avg 0.799179 0.799179 0.799179 2077.0  
weighted avg 0.787786 0.785613 0.799179 2077.0  
The result of Model Number:Dataset Number:Featuregroup Number:Rescale of 55 : 0 : 4 :  
1

f1-score precision recall support  
AFIB 0.810483 0.800135 0.821149 875.0  
GSVT 0.824709 0.829439 0.820055 691.0  
SB 0.882800 0.879092 0.886548 1553.0  
SR 0.856806 0.870675 0.843388 907.0  
macro avg 0.843700 0.844835 0.842785 4026.0  
micro avg 0.851199 0.851199 0.851199 4026.0  
weighted avg 0.851256 0.851513 0.851199 4026.0  
The result of Model Number:Dataset Number:Featuregroup Number:Rescale of 55 : 0 : 5 :  
0

f1-score precision recall support  
AFIB 0.744954 0.759229 0.731397 204.0  
GSVT 0.768644 0.764685 0.772716 300.0  
SB 0.787653 0.786426 0.788889 892.0  
SR 0.779892 0.779117 0.780693 681.0  
macro avg 0.770286 0.772364 0.768424 2077.0  
micro avg 0.778219 0.778219 0.778219 2077.0  
weighted avg 0.778169 0.778218 0.778219 2077.0  
The result of Model Number:Dataset Number:Featuregroup Number:Rescale of 55 : 0 : 5 :  
1

f1-score precision recall support  
AFIB 0.769318 0.852416 0.701123 204.0  
GSVT 0.891803 0.877299 0.906936 300.0  
SB 0.951053 0.946723 0.955424 892.0  
SR 0.928074 0.916264 0.940205 681.0  
macro avg 0.885062 0.898176 0.875922 2077.0

micro avg 0.918454 0.918454 0.918454 2077.0  
weighted avg 0.917111 0.917446 0.918454 2077.0  
The result of Model Number:Dataset Number:Featuregroup Number:Rescale of 55 : 0 : 6 :  
0

|              | f1-score | precision | recall   | support |
|--------------|----------|-----------|----------|---------|
| AFIB         | 0.773920 | 0.792317  | 0.756444 | 204.0   |
| GSVT         | 0.794012 | 0.790948  | 0.797183 | 300.0   |
| SB           | 0.813687 | 0.811871  | 0.815511 | 892.0   |
| SR           | 0.803450 | 0.801834  | 0.805102 | 681.0   |
| macro avg    | 0.796267 | 0.799242  | 0.793560 | 2077.0  |
| micro avg    | 0.803649 | 0.803649  | 0.803649 | 2077.0  |
| weighted avg | 0.803583 | 0.803637  | 0.803649 | 2077.0  |

The result of Model Number:Dataset Number:Featuregroup Number:Rescale of 55 : 0 : 6 :  
1

|              | f1-score | precision | recall   | support |
|--------------|----------|-----------|----------|---------|
| AFIB         | 0.878749 | 0.888311  | 0.869647 | 204.0   |
| GSVT         | 0.908487 | 0.904698  | 0.912454 | 300.0   |
| SB           | 0.927103 | 0.926274  | 0.927934 | 892.0   |
| SR           | 0.918342 | 0.918350  | 0.918342 | 681.0   |
| macro avg    | 0.908170 | 0.909408  | 0.907094 | 2077.0  |
| micro avg    | 0.916828 | 0.916828  | 0.916828 | 2077.0  |
| weighted avg | 0.916792 | 0.916831  | 0.916828 | 2077.0  |

The result of Model Number:Dataset Number:Featuregroup Number:Rescale of 55 : 0 : 7 :  
0

|              | f1-score | precision | recall   | support |
|--------------|----------|-----------|----------|---------|
| AFIB         | 0.811032 | 0.810301  | 0.811842 | 875.0   |
| GSVT         | 0.825082 | 0.817528  | 0.832842 | 691.0   |
| SB           | 0.865825 | 0.858213  | 0.873575 | 1553.0  |
| SR           | 0.825063 | 0.845460  | 0.805699 | 907.0   |
| macro avg    | 0.831751 | 0.832876  | 0.830990 | 4026.0  |
| micro avg    | 0.837875 | 0.837875  | 0.837875 | 4026.0  |
| weighted avg | 0.837741 | 0.837944  | 0.837875 | 4026.0  |

The result of Model Number:Dataset Number:Featuregroup Number:Rescale of 55 : 0 : 7 :  
1

|              | f1-score | precision | recall   | support |
|--------------|----------|-----------|----------|---------|
| AFIB         | 0.720417 | 0.700436  | 0.743839 | 875.0   |
| GSVT         | 0.729822 | 0.760563  | 0.705960 | 691.0   |
| SB           | 0.801735 | 0.801330  | 0.802151 | 1553.0  |
| SR           | 0.781621 | 0.786513  | 0.776796 | 907.0   |
| macro avg    | 0.758399 | 0.762210  | 0.757186 | 4026.0  |
| micro avg    | 0.767256 | 0.767256  | 0.767256 | 4026.0  |
| weighted avg | 0.767187 | 0.769067  | 0.767256 | 4026.0  |

The result of Model Number:Dataset Number:Featuregroup Number:Rescale of 55 : 0 : 8 :  
0

f1-score precision recall support  
AFIB 0.847368 0.863931 0.831576 204.0  
GSVT 0.870652 0.864379 0.877046 300.0  
SB 0.886234 0.882785 0.889711 892.0  
SR 0.876547 0.879027 0.874099 681.0  
macro avg 0.870200 0.872531 0.868108 2077.0  
micro avg 0.877053 0.877053 0.877053 2077.0  
weighted avg 0.876990 0.877042 0.877053 2077.0  
The result of Model Number:Dataset Number:Featuregroup Number:Rescale of 55 : 0 : 8 :  
1

f1-score precision recall support  
AFIB 0.699650 0.730356 0.671599 204.0  
GSVT 0.651329 0.656018 0.646973 300.0  
SB 0.675479 0.641559 0.713190 892.0  
SR 0.599256 0.638822 0.564432 681.0  
macro avg 0.656429 0.666689 0.649048 2077.0  
micro avg 0.650766 0.650766 0.650766 2077.0  
weighted avg 0.649373 0.651471 0.650766 2077.0  
The result of Model Number:Dataset Number:Featuregroup Number:Rescale of 55 : 0 : 9 :  
0

f1-score precision recall support  
AFIB 0.803622 0.809036 0.798398 875.0  
GSVT 0.817964 0.806602 0.829799 691.0  
SB 0.871629 0.865661 0.877688 1553.0  
SR 0.836307 0.850753 0.822389 907.0  
macro avg 0.832380 0.833013 0.832069 4026.0  
micro avg 0.839778 0.839778 0.839778 4026.0  
weighted avg 0.839680 0.839859 0.839778 4026.0  
The result of Model Number:Dataset Number:Featuregroup Number:Rescale of 55 : 0 : 9 :  
1

f1-score precision recall support  
AFIB 0.860727 0.888683 0.834645 204.0  
GSVT 0.884490 0.873212 0.896241 300.0  
SB 0.909444 0.906015 0.912909 892.0  
SR 0.896724 0.898348 0.895141 681.0  
macro avg 0.887846 0.891565 0.884734 2077.0  
micro avg 0.896989 0.896989 0.896989 2077.0  
weighted avg 0.896884 0.897061 0.896989 2077.0  
The result of Model Number:Dataset Number:Featuregroup Number:Rescale of 55 : 0 :  
10 : 0

f1-score precision recall support  
AFIB 0.620684 0.616005 0.704467 204.0  
GSVT 0.752456 0.748001 0.756973 300.0  
SB 0.615404 0.614120 0.616698 892.0

SR 0.761111 0.759893 0.762343 681.0  
macro avg 0.687414 0.684505 0.710120 2077.0  
micro avg 0.693333 0.693333 0.693333 2077.0  
weighted avg 0.683492 0.681438 0.693333 2077.0  
The result of Model Number:Dataset Number:Featuregroup Number:Rescale of 55 : 0 :  
10 : 1

f1-score precision recall support  
AFIB 0.736281 0.815811 0.671014 204.0  
GSVT 0.853506 0.839625 0.867989 300.0  
SB 0.910212 0.906068 0.914395 892.0  
SR 0.888219 0.876916 0.899830 681.0  
macro avg 0.847054 0.859605 0.838307 2077.0  
micro avg 0.879012 0.879012 0.879012 2077.0  
weighted avg 0.877727 0.878048 0.879012 2077.0  
The result of Model Number:Dataset Number:Featuregroup Number:Rescale of 55 : 1 : 0 :  
0

f1-score precision recall support  
AFIB 0.878065 0.891979 0.864694 204.0  
GSVT 0.900634 0.892970 0.908436 300.0  
SB 0.916184 0.914142 0.918238 892.0  
SR 0.907503 0.909520 0.905512 681.0  
macro avg 0.900596 0.902153 0.899220 2077.0  
micro avg 0.907391 0.907391 0.907391 2077.0  
weighted avg 0.907347 0.907392 0.907391 2077.0  
The result of Model Number:Dataset Number:Featuregroup Number:Rescale of 55 : 1 : 0 :  
1

f1-score precision recall support  
AFIB 0.910732 0.921382 0.900496 204.0  
GSVT 0.821485 0.790122 0.937303 300.0  
SB 0.762170 0.760374 0.763982 892.0  
SR 0.946358 0.948177 0.944553 681.0  
macro avg 0.860186 0.855014 0.886584 2077.0  
micro avg 0.861630 0.861630 0.861630 2077.0  
weighted avg 0.845720 0.842061 0.861630 2077.0  
The result of Model Number:Dataset Number:Featuregroup Number:Rescale of 55 : 1 : 1 :  
0

f1-score precision recall support  
AFIB 0.814429 0.816560 0.812470 204.0  
GSVT 0.832805 0.829581 0.836124 300.0  
SB 0.851482 0.850346 0.852626 892.0  
SR 0.844663 0.847036 0.842306 681.0  
macro avg 0.835845 0.835881 0.835881 2077.0  
micro avg 0.842915 0.842915 0.842915 2077.0  
weighted avg 0.842909 0.842943 0.842915 2077.0

The result of Model Number:Dataset Number:Featuregroup Number:Rescale of 55 : 1 : 1 : 1

|              | f1-score | precision | recall   | support |
|--------------|----------|-----------|----------|---------|
| AFIB         | 0.892569 | 0.912960  | 0.873295 | 204.0   |
| GSVT         | 0.933117 | 0.927309  | 0.939022 | 300.0   |
| SB           | 0.953270 | 0.950313  | 0.956259 | 892.0   |
| SR           | 0.942353 | 0.942789  | 0.941943 | 681.0   |
| macro avg    | 0.930327 | 0.933343  | 0.927630 | 2077.0  |
| micro avg    | 0.940927 | 0.940927  | 0.940927 | 2077.0  |
| weighted avg | 0.940818 | 0.940855  | 0.940927 | 2077.0  |

The result of Model Number:Dataset Number:Featuregroup Number:Rescale of 55 : 1 : 2 : 0

|              | f1-score | precision | recall   | support |
|--------------|----------|-----------|----------|---------|
| AFIB         | 0.912789 | 0.927253  | 0.898890 | 204.0   |
| GSVT         | 0.936251 | 0.928283  | 0.944361 | 300.0   |
| SB           | 0.952415 | 0.950293  | 0.954551 | 892.0   |
| SR           | 0.943391 | 0.945489  | 0.941322 | 681.0   |
| macro avg    | 0.936212 | 0.937829  | 0.934781 | 2077.0  |
| micro avg    | 0.943275 | 0.943275  | 0.943275 | 2077.0  |
| weighted avg | 0.943230 | 0.943276  | 0.943275 | 2077.0  |

The result of Model Number:Dataset Number:Featuregroup Number:Rescale of 55 : 1 : 2 : 1

|              | f1-score | precision | recall   | support |
|--------------|----------|-----------|----------|---------|
| AFIB         | 0.693278 | 0.714708  | 0.673700 | 204.0   |
| GSVT         | 0.647166 | 0.661236  | 0.634161 | 300.0   |
| SB           | 0.682597 | 0.652302  | 0.715877 | 892.0   |
| SR           | 0.614604 | 0.646186  | 0.586052 | 681.0   |
| macro avg    | 0.659411 | 0.668608  | 0.652447 | 2077.0  |
| micro avg    | 0.657365 | 0.657365  | 0.657365 | 2077.0  |
| weighted avg | 0.656235 | 0.657716  | 0.657365 | 2077.0  |

The result of Model Number:Dataset Number:Featuregroup Number:Rescale of 55 : 1 : 3 : 0

|              | f1-score | precision | recall   | support |
|--------------|----------|-----------|----------|---------|
| AFIB         | 0.724519 | 0.715973  | 0.733300 | 875.0   |
| GSVT         | 0.738756 | 0.745181  | 0.732447 | 691.0   |
| SB           | 0.787331 | 0.784318  | 0.790371 | 1553.0  |
| SR           | 0.768755 | 0.778049  | 0.759688 | 907.0   |
| macro avg    | 0.754840 | 0.755880  | 0.753952 | 4026.0  |
| micro avg    | 0.761113 | 0.761113  | 0.761113 | 4026.0  |
| weighted avg | 0.761158 | 0.761335  | 0.761113 | 4026.0  |

The result of Model Number:Dataset Number:Featuregroup Number:Rescale of 55 : 1 : 3 : 1

|      | f1-score | precision | recall   | support |
|------|----------|-----------|----------|---------|
| AFIB | 0.927397 | 0.941616  | 0.913753 | 204.0   |

GSVT 0.949386 0.941332 0.957620 300.0  
SB 0.965901 0.962784 0.969042 892.0  
SR 0.955976 0.959525 0.952466 681.0  
macro avg 0.949665 0.951314 0.948220 2077.0  
micro avg 0.956527 0.956527 0.956527 2077.0  
weighted avg 0.956480 0.956538 0.956527 2077.0  
The result of Model Number:Dataset Number:Featuregroup Number:Rescale of 55 : 1 : 4 :  
0

f1-score precision recall support

AFIB 0.798489 0.801061 0.796007 875.0  
GSVT 0.809714 0.796859 0.823065 691.0  
SB 0.853166 0.846042 0.860416 1553.0  
SR 0.810280 0.830859 0.790725 907.0  
macro avg 0.817912 0.818705 0.817553 4026.0  
micro avg 0.824307 0.824307 0.824307 4026.0  
weighted avg 0.824163 0.824404 0.824307 4026.0

The result of Model Number:Dataset Number:Featuregroup Number:Rescale of 55 : 1 : 4 :  
1

f1-score precision recall support

AFIB 0.642986 0.636792 0.649402 875.0  
GSVT 0.659833 0.661720 0.658025 691.0  
SB 0.701516 0.699902 0.703141 1553.0  
SR 0.681782 0.689804 0.673959 907.0  
macro avg 0.671529 0.672055 0.671132 4026.0  
micro avg 0.677144 0.677144 0.677144 4026.0  
weighted avg 0.677195 0.677358 0.677144 4026.0

The result of Model Number:Dataset Number:Featuregroup Number:Rescale of 55 : 1 : 5 :  
0

f1-score precision recall support

AFIB 0.724543 0.725759 0.742501 204.0  
GSVT 0.717731 0.745584 0.692810 300.0  
SB 0.761310 0.719559 0.808516 892.0  
SR 0.659893 0.720792 0.610154 681.0  
macro avg 0.715869 0.727923 0.713495 2077.0  
micro avg 0.720281 0.720281 0.720281 2077.0  
weighted avg 0.718152 0.724331 0.720281 2077.0

The result of Model Number:Dataset Number:Featuregroup Number:Rescale of 55 : 1 : 5 :  
1

f1-score precision recall support

AFIB 0.693302 0.698334 0.688393 875.0  
GSVT 0.708511 0.701925 0.715274 691.0  
SB 0.761441 0.756844 0.766099 1553.0  
SR 0.736486 0.744709 0.728445 907.0  
macro avg 0.724935 0.725453 0.724553 4026.0

micro avg 0.732004 0.732004 0.732004 4026.0  
weighted avg 0.731925 0.731968 0.732004 4026.0  
The result of Model Number:Dataset Number:Featuregroup Number:Rescale of 55 : 1 : 6 :  
0

|              | f1-score | precision | recall   | support |
|--------------|----------|-----------|----------|---------|
| AFIB         | 0.668476 | 0.713786  | 0.629019 | 204.0   |
| GSVT         | 0.629862 | 0.648551  | 0.612458 | 300.0   |
| SB           | 0.658363 | 0.626759  | 0.693700 | 892.0   |
| SR           | 0.584176 | 0.610698  | 0.560499 | 681.0   |
| macro avg    | 0.635220 | 0.649949  | 0.623919 | 2077.0  |
| micro avg    | 0.631939 | 0.631939  | 0.631939 | 2077.0  |
| weighted avg | 0.630916 | 0.633188  | 0.631939 | 2077.0  |

The result of Model Number:Dataset Number:Featuregroup Number:Rescale of 55 : 1 : 6 :  
1

|              | f1-score | precision | recall   | support |
|--------------|----------|-----------|----------|---------|
| AFIB         | 0.691215 | 0.673056  | 0.734486 | 875.0   |
| GSVT         | 0.664942 | 0.629376  | 0.758020 | 691.0   |
| SB           | 0.630067 | 0.626085  | 0.634119 | 1553.0  |
| SR           | 0.612010 | 0.622555  | 0.601987 | 907.0   |
| macro avg    | 0.649558 | 0.637768  | 0.682153 | 4026.0  |
| micro avg    | 0.669959 | 0.669959  | 0.669959 | 4026.0  |
| weighted avg | 0.645274 | 0.636063  | 0.669959 | 4026.0  |

The result of Model Number:Dataset Number:Featuregroup Number:Rescale of 55 : 1 : 7 :  
0

|              | f1-score | precision | recall   | support |
|--------------|----------|-----------|----------|---------|
| AFIB         | 0.645721 | 0.651532  | 0.640217 | 875.0   |
| GSVT         | 0.658875 | 0.645515  | 0.672955 | 691.0   |
| SB           | 0.698741 | 0.690968  | 0.706775 | 1553.0  |
| SR           | 0.671014 | 0.690960  | 0.652345 | 907.0   |
| macro avg    | 0.668588 | 0.669744  | 0.668073 | 4026.0  |
| micro avg    | 0.674243 | 0.674243  | 0.674243 | 4026.0  |
| weighted avg | 0.674129 | 0.674594  | 0.674243 | 4026.0  |

The result of Model Number:Dataset Number:Featuregroup Number:Rescale of 55 : 1 : 7 :  
1

|              | f1-score | precision | recall   | support |
|--------------|----------|-----------|----------|---------|
| AFIB         | 0.780945 | 0.780230  | 0.781755 | 875.0   |
| GSVT         | 0.796952 | 0.795406  | 0.798588 | 691.0   |
| SB           | 0.845670 | 0.843786  | 0.847575 | 1553.0  |
| SR           | 0.822588 | 0.827954  | 0.817321 | 907.0   |
| macro avg    | 0.811539 | 0.811844  | 0.811309 | 4026.0  |
| micro avg    | 0.818046 | 0.818046  | 0.818046 | 4026.0  |
| weighted avg | 0.818041 | 0.818103  | 0.818046 | 4026.0  |

The result of Model Number:Dataset Number:Featuregroup Number:Rescale of 55 : 1 : 8 :  
0

f1-score precision recall support  
AFIB 0.600284 0.666193 0.546387 204.0  
GSVT 0.700913 0.692150 0.710038 300.0  
SB 0.745737 0.741932 0.749583 892.0  
SR 0.728267 0.718086 0.738745 681.0  
macro avg 0.693801 0.704590 0.686188 2077.0  
micro avg 0.720360 0.720360 0.720360 2077.0  
weighted avg 0.719249 0.719484 0.720360 2077.0  
The result of Model Number:Dataset Number:Featuregroup Number:Rescale of 55 : 1 : 8 :  
1

f1-score precision recall support  
AFIB 0.728684 0.721853 0.735739 875.0  
GSVT 0.690862 0.674257 0.741649 691.0  
SB 0.798853 0.795920 0.801831 1553.0  
SR 0.621333 0.625691 0.617045 907.0  
macro avg 0.709933 0.704430 0.724066 4026.0  
micro avg 0.735507 0.735507 0.735507 4026.0  
weighted avg 0.725075 0.720590 0.735507 4026.0  
The result of Model Number:Dataset Number:Featuregroup Number:Rescale of 55 : 1 : 9 :  
0

f1-score precision recall support  
AFIB 0.740746 0.744812 0.736772 875.0  
GSVT 0.741782 0.732404 0.751520 691.0  
SB 0.780112 0.776982 0.783275 1553.0  
SR 0.763366 0.772633 0.754366 907.0  
macro avg 0.756502 0.756708 0.756483 4026.0  
micro avg 0.761205 0.761205 0.761205 4026.0  
weighted avg 0.761205 0.761359 0.761205 4026.0  
The result of Model Number:Dataset Number:Featuregroup Number:Rescale of 55 : 1 : 9 :  
1

f1-score precision recall support  
AFIB 0.674242 0.672373 0.676171 875.0  
GSVT 0.679577 0.682819 0.676434 691.0  
SB 0.711398 0.709125 0.713688 1553.0  
SR 0.700025 0.703406 0.696708 907.0  
macro avg 0.691310 0.691931 0.690751 4026.0  
micro avg 0.695315 0.695315 0.695315 4026.0  
weighted avg 0.695299 0.695334 0.695315 4026.0  
The result of Model Number:Dataset Number:Featuregroup Number:Rescale of 55 : 1 :  
10 : 0

f1-score precision recall support  
AFIB 0.728997 0.724636 0.733509 875.0  
GSVT 0.734967 0.738935 0.731147 691.0  
SB 0.778955 0.776677 0.781257 1553.0



SR 0.761353 0.766822 0.755977 907.0  
macro avg 0.751068 0.751768 0.750473 4026.0  
micro avg 0.756584 0.756584 0.756584 4026.0  
weighted avg 0.756582 0.756669 0.756584 4026.0  
The result of Model Number:Dataset Number:Featuregroup Number:Rescale of 55 : 1 :  
10 : 1

f1-score precision recall support  
AFIB 0.853417 0.865955 0.841315 204.0  
GSVT 0.875040 0.867601 0.882626 300.0  
SB 0.890163 0.886602 0.893755 892.0  
SR 0.881359 0.885685 0.877086 681.0  
macro avg 0.874995 0.876461 0.873696 2077.0  
micro avg 0.881532 0.881532 0.881532 2077.0  
weighted avg 0.881483 0.881529 0.881532 2077.0

The result of Model Number:Dataset Number:Featuregroup Number:Rescale of 56 : 0 : 0 :  
0

f1-score precision recall support  
AFIB 0.791878 0.797800 0.786074 204.0  
GSVT 0.812112 0.807826 0.816444 300.0  
SB 0.825817 0.824713 0.826927 892.0  
SR 0.818544 0.820113 0.816982 681.0  
macro avg 0.812088 0.812613 0.811607 2077.0  
micro avg 0.818140 0.818140 0.818140 2077.0  
weighted avg 0.818119 0.818122 0.818140 2077.0

The result of Model Number:Dataset Number:Featuregroup Number:Rescale of 56 : 0 : 0 :  
1

f1-score precision recall support  
AFIB 0.635554 0.704039 0.579722 204.0  
GSVT 0.749152 0.738651 0.760149 300.0  
SB 0.795418 0.792857 0.798004 892.0  
SR 0.775053 0.763265 0.787232 681.0  
macro avg 0.738795 0.749703 0.731277 2077.0  
micro avg 0.767565 0.767565 0.767565 2077.0  
weighted avg 0.766357 0.766602 0.767565 2077.0

The result of Model Number:Dataset Number:Featuregroup Number:Rescale of 56 : 0 : 1 :  
0

f1-score precision recall support  
AFIB 0.655811 0.655639 0.656046 875.0  
GSVT 0.669510 0.666979 0.672133 691.0  
SB 0.712795 0.709577 0.716053 1553.0  
SR 0.688772 0.696642 0.681105 907.0  
macro avg 0.681722 0.682209 0.681334 4026.0  
micro avg 0.687600 0.687600 0.687600 4026.0  
weighted avg 0.687569 0.687629 0.687600 4026.0

The result of Model Number:Dataset Number:Featuregroup Number:Rescale of 56 : 0 : 1 : 1

|              | f1-score | precision | recall   | support |
|--------------|----------|-----------|----------|---------|
| AFIB         | 0.862883 | 0.871319  | 0.854812 | 875.0   |
| GSVT         | 0.856293 | 0.849795  | 0.863171 | 691.0   |
| SB           | 0.906055 | 0.896733  | 0.915653 | 1553.0  |
| SR           | 0.877295 | 0.891404  | 0.863874 | 907.0   |
| macro avg    | 0.875632 | 0.877313  | 0.874377 | 4026.0  |
| micro avg    | 0.881757 | 0.881757  | 0.881757 | 4026.0  |
| weighted avg | 0.881652 | 0.881953  | 0.881757 | 4026.0  |

The result of Model Number:Dataset Number:Featuregroup Number:Rescale of 56 : 0 : 2 : 0

|              | f1-score | precision | recall   | support |
|--------------|----------|-----------|----------|---------|
| AFIB         | 0.697518 | 0.699373  | 0.695714 | 875.0   |
| GSVT         | 0.710931 | 0.705923  | 0.716053 | 691.0   |
| SB           | 0.751538 | 0.743875  | 0.759375 | 1553.0  |
| SR           | 0.717184 | 0.732805  | 0.702240 | 907.0   |
| macro avg    | 0.719292 | 0.720494  | 0.718345 | 4026.0  |
| micro avg    | 0.725232 | 0.725232  | 0.725232 | 4026.0  |
| weighted avg | 0.725088 | 0.725195  | 0.725232 | 4026.0  |

The result of Model Number:Dataset Number:Featuregroup Number:Rescale of 56 : 0 : 2 : 1

|              | f1-score | precision | recall   | support |
|--------------|----------|-----------|----------|---------|
| AFIB         | 0.885598 | 0.886796  | 0.884572 | 875.0   |
| GSVT         | 0.899392 | 0.898929  | 0.899888 | 691.0   |
| SB           | 0.939321 | 0.935961  | 0.942710 | 1553.0  |
| SR           | 0.916828 | 0.921967  | 0.911805 | 907.0   |
| macro avg    | 0.910285 | 0.910913  | 0.909744 | 4026.0  |
| micro avg    | 0.915762 | 0.915762  | 0.915762 | 4026.0  |
| weighted avg | 0.915725 | 0.915767  | 0.915762 | 4026.0  |

The result of Model Number:Dataset Number:Featuregroup Number:Rescale of 56 : 0 : 3 : 0

|              | f1-score | precision | recall   | support |
|--------------|----------|-----------|----------|---------|
| AFIB         | 0.857963 | 0.867994  | 0.848326 | 204.0   |
| GSVT         | 0.881565 | 0.877512  | 0.885680 | 300.0   |
| SB           | 0.894046 | 0.891266  | 0.896850 | 892.0   |
| SR           | 0.886347 | 0.888859  | 0.883887 | 681.0   |
| macro avg    | 0.879980 | 0.881408  | 0.878686 | 2077.0  |
| micro avg    | 0.886220 | 0.886220  | 0.886220 | 2077.0  |
| weighted avg | 0.886175 | 0.886205  | 0.886220 | 2077.0  |

The result of Model Number:Dataset Number:Featuregroup Number:Rescale of 56 : 0 : 3 : 1

|      | f1-score | precision | recall   | support |
|------|----------|-----------|----------|---------|
| AFIB | 0.829800 | 0.845879  | 0.814692 | 204.0   |

GSVT 0.861977 0.854770 0.869466 300.0  
SB 0.878061 0.876299 0.879833 892.0  
SR 0.869688 0.870589 0.868793 681.0  
macro avg 0.859882 0.861884 0.858196 2077.0  
micro avg 0.868318 0.868318 0.868318 2077.0  
weighted avg 0.868253 0.868330 0.868318 2077.0  
The result of Model Number:Dataset Number:Featuregroup Number:Rescale of 56 : 0 : 4 :  
0

f1-score precision recall support  
AFIB 0.715743 0.722345 0.709434 204.0  
GSVT 0.741911 0.741937 0.741904 300.0  
SB 0.757448 0.756103 0.758805 892.0  
SR 0.749410 0.749209 0.749628 681.0  
macro avg 0.741128 0.742398 0.739943 2077.0  
micro avg 0.748506 0.748506 0.748506 2077.0  
weighted avg 0.748472 0.748481 0.748506 2077.0  
The result of Model Number:Dataset Number:Featuregroup Number:Rescale of 56 : 0 : 4 :  
1

f1-score precision recall support  
AFIB 0.884983 0.915932 0.856466 204.0  
GSVT 0.922357 0.916735 0.928175 300.0  
SB 0.941298 0.937430 0.945200 892.0  
SR 0.932595 0.931235 0.933965 681.0  
macro avg 0.920308 0.925333 0.915952 2077.0  
micro avg 0.930342 0.930342 0.930342 2077.0  
weighted avg 0.930177 0.930298 0.930342 2077.0  
The result of Model Number:Dataset Number:Featuregroup Number:Rescale of 56 : 0 : 5 :  
0

f1-score precision recall support  
AFIB 0.712338 0.719622 0.705261 875.0  
GSVT 0.712124 0.701123 0.723560 691.0  
SB 0.751196 0.746710 0.755742 1553.0  
SR 0.731313 0.741101 0.721802 907.0  
macro avg 0.726743 0.727139 0.726591 4026.0  
micro avg 0.731601 0.731601 0.731601 4026.0  
weighted avg 0.731565 0.731735 0.731601 4026.0  
The result of Model Number:Dataset Number:Featuregroup Number:Rescale of 56 : 0 : 5 :  
1

f1-score precision recall support  
AFIB 0.684615 0.684941 0.684388 875.0  
GSVT 0.702345 0.696266 0.708556 691.0  
SB 0.750107 0.744641 0.755661 1553.0  
SR 0.718062 0.732336 0.704370 907.0  
macro avg 0.713782 0.714546 0.713244 4026.0

micro avg 0.720531 0.720531 0.720531 4026.0  
weighted avg 0.720456 0.720591 0.720531 4026.0  
The result of Model Number:Dataset Number:Featuregroup Number:Rescale of 56 : 0 : 6 :  
0

|              | f1-score | precision | recall   | support |
|--------------|----------|-----------|----------|---------|
| AFIB         | 0.744756 | 0.748158  | 0.741426 | 875.0   |
| GSVT         | 0.757172 | 0.750768  | 0.763741 | 691.0   |
| SB           | 0.800346 | 0.792173  | 0.808694 | 1553.0  |
| SR           | 0.759040 | 0.775041  | 0.743727 | 907.0   |
| macro avg    | 0.765329 | 0.766535  | 0.764397 | 4026.0  |
| micro avg    | 0.771722 | 0.771722  | 0.771722 | 4026.0  |
| weighted avg | 0.771549 | 0.771641  | 0.771722 | 4026.0  |

The result of Model Number:Dataset Number:Featuregroup Number:Rescale of 56 : 0 : 6 :  
1

|              | f1-score | precision | recall   | support |
|--------------|----------|-----------|----------|---------|
| AFIB         | 0.817754 | 0.812228  | 0.823468 | 875.0   |
| GSVT         | 0.837705 | 0.838038  | 0.837479 | 691.0   |
| SB           | 0.889891 | 0.887620  | 0.892183 | 1553.0  |
| SR           | 0.865660 | 0.875332  | 0.856211 | 907.0   |
| macro avg    | 0.852752 | 0.853304  | 0.852335 | 4026.0  |
| micro avg    | 0.859756 | 0.859756  | 0.859756 | 4026.0  |
| weighted avg | 0.859797 | 0.859956  | 0.859756 | 4026.0  |

The result of Model Number:Dataset Number:Featuregroup Number:Rescale of 56 : 0 : 7 :  
0

|              | f1-score | precision | recall   | support |
|--------------|----------|-----------|----------|---------|
| AFIB         | 0.724912 | 0.738251  | 0.712414 | 204.0   |
| GSVT         | 0.751657 | 0.745362  | 0.758190 | 300.0   |
| SB           | 0.765771 | 0.764488  | 0.767059 | 892.0   |
| SR           | 0.759010 | 0.759684  | 0.758341 | 681.0   |
| macro avg    | 0.750337 | 0.751946  | 0.749001 | 2077.0  |
| micro avg    | 0.757552 | 0.757552  | 0.757552 | 2077.0  |
| weighted avg | 0.757502 | 0.757573  | 0.757552 | 2077.0  |

The result of Model Number:Dataset Number:Featuregroup Number:Rescale of 56 : 0 : 7 :  
1

|              | f1-score | precision | recall   | support |
|--------------|----------|-----------|----------|---------|
| AFIB         | 0.658685 | 0.652580  | 0.664942 | 875.0   |
| GSVT         | 0.670514 | 0.674156  | 0.666923 | 691.0   |
| SB           | 0.710448 | 0.708810  | 0.712094 | 1553.0  |
| SR           | 0.693895 | 0.700299  | 0.687630 | 907.0   |
| macro avg    | 0.683386 | 0.683961  | 0.682897 | 4026.0  |
| micro avg    | 0.688582 | 0.688582  | 0.688582 | 4026.0  |
| weighted avg | 0.688615 | 0.688724  | 0.688582 | 4026.0  |

The result of Model Number:Dataset Number:Featuregroup Number:Rescale of 56 : 0 : 8 :  
0

f1-score precision recall support  
AFIB 0.789224 0.779148 0.799610 875.0  
GSVT 0.803077 0.807682 0.798545 691.0  
SB 0.859644 0.856034 0.863293 1553.0  
SR 0.834332 0.847837 0.821266 907.0  
macro avg 0.821569 0.822675 0.820679 4026.0  
micro avg 0.828871 0.828871 0.828871 4026.0  
weighted avg 0.828928 0.829178 0.828871 4026.0  
The result of Model Number:Dataset Number:Featuregroup Number:Rescale of 56 : 0 : 8 :  
1

f1-score precision recall support  
AFIB 0.756073 0.753887 0.758341 875.0  
GSVT 0.770086 0.769460 0.770767 691.0  
SB 0.817943 0.814556 0.821366 1553.0  
SR 0.793388 0.802104 0.784902 907.0  
macro avg 0.784373 0.785002 0.783844 4026.0  
micro avg 0.790769 0.790769 0.790769 4026.0  
weighted avg 0.790751 0.790825 0.790769 4026.0  
The result of Model Number:Dataset Number:Featuregroup Number:Rescale of 56 : 0 : 9 :  
0

f1-score precision recall support  
AFIB 0.698039 0.711661 0.685051 204.0  
GSVT 0.715437 0.706205 0.724961 300.0  
SB 0.727614 0.720421 0.734956 892.0  
SR 0.712405 0.722304 0.702780 681.0  
macro avg 0.713374 0.715148 0.711937 2077.0  
micro avg 0.718061 0.718061 0.718061 2077.0  
weighted avg 0.717964 0.718124 0.718061 2077.0  
The result of Model Number:Dataset Number:Featuregroup Number:Rescale of 56 : 0 : 9 :  
1

f1-score precision recall support  
AFIB 0.853909 0.856659 0.851255 875.0  
GSVT 0.865914 0.852166 0.880190 691.0  
SB 0.912381 0.904763 0.920135 1553.0  
SR 0.866518 0.888526 0.845607 907.0  
macro avg 0.874680 0.875528 0.874297 4026.0  
micro avg 0.881519 0.881519 0.881519 4026.0  
weighted avg 0.881365 0.881623 0.881519 4026.0  
The result of Model Number:Dataset Number:Featuregroup Number:Rescale of 56 : 0 :  
10 : 0

f1-score precision recall support  
AFIB 0.754742 0.766998 0.742912 875.0  
GSVT 0.802691 0.805206 0.800239 691.0  
SB 0.873287 0.870278 0.876322 1553.0

SR 0.826748 0.817540 0.836217 907.0  
macro avg 0.814367 0.815005 0.813922 4026.0  
micro avg 0.825233 0.825233 0.825233 4026.0  
weighted avg 0.824921 0.824782 0.825233 4026.0  
The result of Model Number:Dataset Number:Featuregroup Number:Rescale of 56 : 0 :  
10 : 1

f1-score precision recall support  
AFIB 0.670190 0.726137 0.623583 204.0  
GSVT 0.718856 0.709817 0.728421 300.0  
SB 0.737207 0.726879 0.747919 892.0  
SR 0.717098 0.720457 0.714119 681.0  
macro avg 0.710838 0.720823 0.703511 2077.0  
micro avg 0.721808 0.721808 0.721808 2077.0  
weighted avg 0.721381 0.722236 0.721808 2077.0

The result of Model Number:Dataset Number:Featuregroup Number:Rescale of 56 : 1 : 0 :  
0

f1-score precision recall support  
AFIB 0.782660 0.783719 0.781754 875.0  
GSVT 0.794850 0.794442 0.795289 691.0  
SB 0.830139 0.827169 0.833133 1553.0  
SR 0.810260 0.814801 0.805821 907.0  
macro avg 0.804477 0.805033 0.803999 4026.0  
micro avg 0.809318 0.809318 0.809318 4026.0  
weighted avg 0.809285 0.809322 0.809318 4026.0

The result of Model Number:Dataset Number:Featuregroup Number:Rescale of 56 : 1 : 0 :  
1

f1-score precision recall support  
AFIB 0.770421 0.845949 0.708027 204.0  
GSVT 0.903907 0.891724 0.916573 300.0  
SB 0.959667 0.956466 0.962894 892.0  
SR 0.934727 0.922194 0.947628 681.0  
macro avg 0.892180 0.904083 0.883780 2077.0  
micro avg 0.926165 0.926165 0.926165 2077.0  
weighted avg 0.924848 0.925023 0.926165 2077.0

The result of Model Number:Dataset Number:Featuregroup Number:Rescale of 56 : 1 : 1 :  
0

f1-score precision recall support  
AFIB 0.840972 0.821372 0.861667 875.0  
GSVT 0.807304 0.816178 0.798675 691.0  
SB 0.849558 0.794699 0.912573 1553.0  
SR 0.679939 0.816475 0.582888 907.0  
macro avg 0.794443 0.812181 0.788951 4026.0  
micro avg 0.807687 0.807687 0.807687 4026.0  
weighted avg 0.802227 0.809088 0.807687 4026.0

The result of Model Number:Dataset Number:Featuregroup Number:Rescale of 56 : 1 : 1 : 1

|              | f1-score | precision | recall   | support |
|--------------|----------|-----------|----------|---------|
| AFIB         | 0.883051 | 0.899251  | 0.867492 | 204.0   |
| GSVT         | 0.894697 | 0.885668  | 0.903931 | 300.0   |
| SB           | 0.916736 | 0.911964  | 0.921564 | 892.0   |
| SR           | 0.904256 | 0.909922  | 0.898679 | 681.0   |
| macro avg    | 0.899685 | 0.901701  | 0.897917 | 2077.0  |
| micro avg    | 0.906203 | 0.906203  | 0.906203 | 2077.0  |
| weighted avg | 0.906152 | 0.906248  | 0.906203 | 2077.0  |

The result of Model Number:Dataset Number:Featuregroup Number:Rescale of 56 : 1 : 2 : 0

|              | f1-score | precision | recall   | support |
|--------------|----------|-----------|----------|---------|
| AFIB         | 0.784910 | 0.773091  | 0.803630 | 875.0   |
| GSVT         | 0.749447 | 0.747266  | 0.755840 | 691.0   |
| SB           | 0.800313 | 0.745764  | 0.870127 | 1553.0  |
| SR           | 0.592841 | 0.792453  | 0.491240 | 907.0   |
| macro avg    | 0.731878 | 0.764643  | 0.730209 | 4026.0  |
| micro avg    | 0.750701 | 0.750701  | 0.750701 | 4026.0  |
| weighted avg | 0.741494 | 0.762479  | 0.750701 | 4026.0  |

The result of Model Number:Dataset Number:Featuregroup Number:Rescale of 56 : 1 : 2 : 1

|              | f1-score | precision | recall   | support |
|--------------|----------|-----------|----------|---------|
| AFIB         | 0.701139 | 0.710504  | 0.692214 | 204.0   |
| GSVT         | 0.713525 | 0.709178  | 0.718034 | 300.0   |
| SB           | 0.730724 | 0.730076  | 0.731378 | 892.0   |
| SR           | 0.725325 | 0.725435  | 0.725219 | 681.0   |
| macro avg    | 0.717678 | 0.718798  | 0.716712 | 2077.0  |
| micro avg    | 0.723585 | 0.723585  | 0.723585 | 2077.0  |
| weighted avg | 0.723564 | 0.723614  | 0.723585 | 2077.0  |

The result of Model Number:Dataset Number:Featuregroup Number:Rescale of 56 : 1 : 3 : 0

|              | f1-score | precision | recall   | support |
|--------------|----------|-----------|----------|---------|
| AFIB         | 0.754431 | 0.742598  | 0.766728 | 875.0   |
| GSVT         | 0.726943 | 0.747783  | 0.707318 | 691.0   |
| SB           | 0.763897 | 0.725174  | 0.807032 | 1553.0  |
| SR           | 0.620662 | 0.690670  | 0.563636 | 907.0   |
| macro avg    | 0.716483 | 0.726557  | 0.711178 | 4026.0  |
| micro avg    | 0.726324 | 0.726324  | 0.726324 | 4026.0  |
| weighted avg | 0.723228 | 0.725068  | 0.726324 | 4026.0  |

The result of Model Number:Dataset Number:Featuregroup Number:Rescale of 56 : 1 : 3 : 1

|      | f1-score | precision | recall   | support |
|------|----------|-----------|----------|---------|
| AFIB | 0.685569 | 0.684941  | 0.686280 | 875.0   |

GSVT 0.699621 0.698264 0.701057 691.0  
SB 0.742389 0.740735 0.744061 1553.0  
SR 0.722126 0.726837 0.717502 907.0  
macro avg 0.712426 0.712694 0.712225 4026.0  
micro avg 0.718139 0.718139 0.718139 4026.0  
weighted avg 0.718134 0.718189 0.718139 4026.0  
The result of Model Number:Dataset Number:Featuregroup Number:Rescale of 56 : 1 : 4 :  
0

f1-score precision recall support  
AFIB 0.795191 0.784011 0.806733 875.0  
GSVT 0.812312 0.818407 0.806328 691.0  
SB 0.863801 0.861262 0.866358 1553.0  
SR 0.842523 0.854179 0.831195 907.0  
macro avg 0.828457 0.829465 0.827654 4026.0  
micro avg 0.835174 0.835174 0.835174 4026.0  
weighted avg 0.835258 0.835521 0.835174 4026.0  
The result of Model Number:Dataset Number:Featuregroup Number:Rescale of 56 : 1 : 4 :  
1

f1-score precision recall support  
AFIB 0.729877 0.724441 0.735468 875.0  
GSVT 0.743489 0.746144 0.740898 691.0  
SB 0.788933 0.787064 0.790812 1553.0  
SR 0.770929 0.777870 0.764139 907.0  
macro avg 0.758307 0.758880 0.757829 4026.0  
micro avg 0.764208 0.764208 0.764208 4026.0  
weighted avg 0.764242 0.764359 0.764208 4026.0  
The result of Model Number:Dataset Number:Featuregroup Number:Rescale of 56 : 1 : 5 :  
0

f1-score precision recall support  
AFIB 0.591288 0.596185 0.666005 204.0  
GSVT 0.641212 0.613767 0.723437 300.0  
SB 0.585450 0.583416 0.587501 892.0  
SR 0.579629 0.579739 0.579524 681.0  
macro avg 0.599395 0.593277 0.639117 2077.0  
micro avg 0.612230 0.612230 0.612230 2077.0  
weighted avg 0.592169 0.587848 0.612230 2077.0  
The result of Model Number:Dataset Number:Featuregroup Number:Rescale of 56 : 1 : 5 :  
1

f1-score precision recall support  
AFIB 0.813540 0.811962 0.815228 875.0  
GSVT 0.828816 0.814315 0.843923 691.0  
SB 0.887896 0.875298 0.900871 1553.0  
SR 0.841072 0.878566 0.806683 907.0  
macro avg 0.842831 0.845035 0.841677 4026.0



micro avg 0.851264 0.851264 0.851264 4026.0  
weighted avg 0.851047 0.851802 0.851264 4026.0  
The result of Model Number:Dataset Number:Featuregroup Number:Rescale of 56 : 1 : 6 :  
0

|              | f1-score | precision | recall   | support |
|--------------|----------|-----------|----------|---------|
| AFIB         | 0.906010 | 0.907826  | 0.904241 | 875.0   |
| GSVT         | 0.908254 | 0.903351  | 0.913235 | 691.0   |
| SB           | 0.949431 | 0.944358  | 0.954564 | 1553.0  |
| SR           | 0.926717 | 0.937707  | 0.916008 | 907.0   |
| macro avg    | 0.922603 | 0.923311  | 0.922012 | 4026.0  |
| micro avg    | 0.927847 | 0.927847  | 0.927847 | 4026.0  |
| weighted avg | 0.927809 | 0.927882  | 0.927847 | 4026.0  |

The result of Model Number:Dataset Number:Featuregroup Number:Rescale of 56 : 1 : 6 :  
1

|              | f1-score | precision | recall   | support |
|--------------|----------|-----------|----------|---------|
| AFIB         | 0.640382 | 0.665267  | 0.617339 | 875.0   |
| GSVT         | 0.688432 | 0.683348  | 0.693683 | 691.0   |
| SB           | 0.756534 | 0.752636  | 0.760477 | 1553.0  |
| SR           | 0.711967 | 0.698391  | 0.726159 | 907.0   |
| macro avg    | 0.699329 | 0.699910  | 0.699415 | 4026.0  |
| micro avg    | 0.710172 | 0.710172  | 0.710172 | 4026.0  |
| weighted avg | 0.709561 | 0.709535  | 0.710172 | 4026.0  |

The result of Model Number:Dataset Number:Featuregroup Number:Rescale of 56 : 1 : 7 :  
0

|              | f1-score | precision | recall   | support |
|--------------|----------|-----------|----------|---------|
| AFIB         | 0.701652 | 0.696791  | 0.706722 | 875.0   |
| GSVT         | 0.712476 | 0.715368  | 0.709724 | 691.0   |
| SB           | 0.773038 | 0.765000  | 0.781251 | 1553.0  |
| SR           | 0.734007 | 0.751086  | 0.717754 | 907.0   |
| macro avg    | 0.730293 | 0.732061  | 0.728863 | 4026.0  |
| micro avg    | 0.738472 | 0.738472  | 0.738472 | 4026.0  |
| weighted avg | 0.738336 | 0.738523  | 0.738472 | 4026.0  |

The result of Model Number:Dataset Number:Featuregroup Number:Rescale of 56 : 1 : 7 :  
1

|              | f1-score | precision | recall   | support |
|--------------|----------|-----------|----------|---------|
| AFIB         | 0.818512 | 0.808607  | 0.828699 | 875.0   |
| GSVT         | 0.829591 | 0.838097  | 0.821321 | 691.0   |
| SB           | 0.881110 | 0.878243  | 0.884003 | 1553.0  |
| SR           | 0.861838 | 0.870694  | 0.853191 | 907.0   |
| macro avg    | 0.847763 | 0.848910  | 0.846803 | 4026.0  |
| micro avg    | 0.854283 | 0.854283  | 0.854283 | 4026.0  |
| weighted avg | 0.854321 | 0.854517  | 0.854283 | 4026.0  |

The result of Model Number:Dataset Number:Featuregroup Number:Rescale of 56 : 1 : 8 :  
0

f1-score precision recall support  
AFIB 0.781083 0.812609 0.751974 204.0  
GSVT 0.810150 0.796989 0.823892 300.0  
SB 0.831109 0.824427 0.837910 892.0  
SR 0.808749 0.814573 0.803050 681.0  
macro avg 0.807772 0.812149 0.804206 2077.0  
micro avg 0.816015 0.816015 0.816015 2077.0  
weighted avg 0.815837 0.816072 0.816015 2077.0  
The result of Model Number:Dataset Number:Featuregroup Number:Rescale of 56 : 1 : 8 :  
1

f1-score precision recall support  
AFIB 0.858807 0.852194 0.865588 875.0  
GSVT 0.869957 0.873996 0.866145 691.0  
SB 0.932280 0.927321 0.937313 1553.0  
SR 0.904812 0.917533 0.892538 907.0  
macro avg 0.891464 0.892761 0.890396 4026.0  
micro avg 0.899423 0.899423 0.899423 4026.0  
weighted avg 0.899427 0.899636 0.899423 4026.0  
The result of Model Number:Dataset Number:Featuregroup Number:Rescale of 56 : 1 : 9 :  
0

f1-score precision recall support  
AFIB 0.797573 0.802121 0.793207 204.0  
GSVT 0.813983 0.808112 0.819948 300.0  
SB 0.830423 0.827390 0.833493 892.0  
SR 0.821591 0.826986 0.816287 681.0  
macro avg 0.815892 0.816152 0.815734 2077.0  
micro avg 0.821938 0.821938 0.821938 2077.0  
weighted avg 0.821926 0.821991 0.821938 2077.0  
The result of Model Number:Dataset Number:Featuregroup Number:Rescale of 56 : 1 : 9 :  
1

f1-score precision recall support  
AFIB 0.763113 0.773306 0.753400 204.0  
GSVT 0.776594 0.771863 0.781502 300.0  
SB 0.795314 0.794609 0.796025 892.0  
SR 0.789437 0.789557 0.789322 681.0  
macro avg 0.781114 0.782334 0.780062 2077.0  
micro avg 0.787543 0.787543 0.787543 2077.0  
weighted avg 0.787520 0.787575 0.787543 2077.0  
The result of Model Number:Dataset Number:Featuregroup Number:Rescale of 56 : 1 :  
10 : 0

f1-score precision recall support  
AFIB 0.735172 0.737217 0.733177 875.0  
GSVT 0.752013 0.751804 0.752229 691.0  
SB 0.800917 0.793389 0.808598 1553.0

SR 0.779695 0.790939 0.768776 907.0  
macro avg 0.766949 0.768338 0.765695 4026.0  
micro avg 0.773560 0.773560 0.773560 4026.0  
weighted avg 0.773454 0.773492 0.773560 4026.0  
The result of Model Number:Dataset Number:Featuregroup Number:Rescale of 56 : 1 : 10 : 1

f1-score precision recall support  
AFIB 0.852737 0.851717 0.853904 875.0  
GSVT 0.869360 0.872350 0.866480 691.0  
SB 0.920782 0.915109 0.926532 1553.0  
SR 0.902044 0.910854 0.893502 907.0  
macro avg 0.886231 0.887508 0.885105 4026.0  
micro avg 0.892999 0.892999 0.892999 4026.0  
weighted avg 0.892946 0.893034 0.892999 4026.0  
The result of Model Number:Dataset Number:Featuregroup Number:Rescale of 57 : 0 : 0 : 0

f1-score precision recall support  
AFIB 0.670696 0.684150 0.657893 204.0  
GSVT 0.686239 0.679106 0.693560 300.0  
SB 0.698931 0.696212 0.701673 892.0  
SR 0.691586 0.694472 0.688741 681.0  
macro avg 0.686863 0.688485 0.685467 2077.0  
micro avg 0.691961 0.691961 0.691961 2077.0  
weighted avg 0.691916 0.691986 0.691961 2077.0  
The result of Model Number:Dataset Number:Featuregroup Number:Rescale of 57 : 0 : 0 : 1

f1-score precision recall support  
AFIB 0.843325 0.913725 0.784678 204.0  
GSVT 0.904563 0.893189 0.916600 300.0  
SB 0.927656 0.914660 0.941134 892.0  
SR 0.902351 0.906578 0.898603 681.0  
macro avg 0.894474 0.907038 0.885254 2077.0  
micro avg 0.908278 0.908278 0.908278 2077.0  
weighted avg 0.907741 0.908817 0.908278 2077.0  
The result of Model Number:Dataset Number:Featuregroup Number:Rescale of 57 : 0 : 1 : 0

f1-score precision recall support  
AFIB 0.880669 0.898412 0.864178 204.0  
GSVT 0.908927 0.901627 0.916521 300.0  
SB 0.928604 0.927669 0.929541 892.0  
SR 0.920140 0.919612 0.920679 681.0  
macro avg 0.909585 0.911830 0.907730 2077.0  
micro avg 0.918335 0.918335 0.918335 2077.0  
weighted avg 0.918279 0.918392 0.918335 2077.0

The result of Model Number:Dataset Number:Featuregroup Number:Rescale of 57 : 0 : 1 :  
1

|              | f1-score | precision | recall   | support |
|--------------|----------|-----------|----------|---------|
| AFIB         | 0.728442 | 0.717554  | 0.739692 | 875.0   |
| GSVT         | 0.742408 | 0.748758  | 0.736178 | 691.0   |
| SB           | 0.793246 | 0.790515  | 0.796002 | 1553.0  |
| SR           | 0.770028 | 0.781513  | 0.758902 | 907.0   |
| macro avg    | 0.758531 | 0.759585  | 0.757693 | 4026.0  |
| micro avg    | 0.765138 | 0.765138  | 0.765138 | 4026.0  |
| weighted avg | 0.765206 | 0.765463  | 0.765138 | 4026.0  |

The result of Model Number:Dataset Number:Featuregroup Number:Rescale of 57 : 0 : 2 :  
0

|              | f1-score | precision | recall   | support |
|--------------|----------|-----------|----------|---------|
| AFIB         | 0.722537 | 0.727696  | 0.717580 | 204.0   |
| GSVT         | 0.747802 | 0.747320  | 0.748299 | 300.0   |
| SB           | 0.762764 | 0.761072  | 0.764472 | 892.0   |
| SR           | 0.755946 | 0.756860  | 0.755057 | 681.0   |
| macro avg    | 0.747262 | 0.748237  | 0.746352 | 2077.0  |
| micro avg    | 0.754443 | 0.754443  | 0.754443 | 2077.0  |
| weighted avg | 0.754416 | 0.754427  | 0.754443 | 2077.0  |

The result of Model Number:Dataset Number:Featuregroup Number:Rescale of 57 : 0 : 2 :  
1

|              | f1-score | precision | recall   | support |
|--------------|----------|-----------|----------|---------|
| AFIB         | 0.835619 | 0.826289  | 0.845171 | 875.0   |
| GSVT         | 0.852244 | 0.860050  | 0.844592 | 691.0   |
| SB           | 0.908957 | 0.905997  | 0.911940 | 1553.0  |
| SR           | 0.885394 | 0.894263  | 0.876701 | 907.0   |
| macro avg    | 0.870553 | 0.871650  | 0.869601 | 4026.0  |
| micro avg    | 0.877931 | 0.877931  | 0.877931 | 4026.0  |
| weighted avg | 0.877976 | 0.878144  | 0.877931 | 4026.0  |

The result of Model Number:Dataset Number:Featuregroup Number:Rescale of 57 : 0 : 3 :  
0

|              | f1-score | precision | recall   | support |
|--------------|----------|-----------|----------|---------|
| AFIB         | 0.652244 | 0.657414  | 0.647171 | 875.0   |
| GSVT         | 0.660513 | 0.657601  | 0.663473 | 691.0   |
| SB           | 0.702378 | 0.699601  | 0.705182 | 1553.0  |
| SR           | 0.685118 | 0.687054  | 0.683226 | 907.0   |
| macro avg    | 0.675063 | 0.675417  | 0.674763 | 4026.0  |
| micro avg    | 0.680469 | 0.680469  | 0.680469 | 4026.0  |
| weighted avg | 0.680408 | 0.680397  | 0.680469 | 4026.0  |

The result of Model Number:Dataset Number:Featuregroup Number:Rescale of 57 : 0 : 3 :  
1

|      | f1-score | precision | recall   | support |
|------|----------|-----------|----------|---------|
| AFIB | 0.638481 | 0.628259  | 0.718420 | 204.0   |

GSVT 0.747492 0.738819 0.756644 300.0  
SB 0.772521 0.769604 0.775465 892.0  
SR 0.606134 0.609268 0.603135 681.0  
macro avg 0.691157 0.686487 0.713416 2077.0  
micro avg 0.710641 0.710641 0.710641 2077.0  
weighted avg 0.701186 0.698704 0.710641 2077.0  
The result of Model Number:Dataset Number:Featuregroup Number:Rescale of 57 : 0 : 4 :  
0

f1-score precision recall support  
AFIB 0.726108 0.723155 0.729103 875.0  
GSVT 0.736722 0.741175 0.732350 691.0  
SB 0.777012 0.776066 0.777962 1553.0  
SR 0.760802 0.762007 0.759623 907.0  
macro avg 0.750161 0.750601 0.749759 4026.0  
micro avg 0.755383 0.755383 0.755383 4026.0  
weighted avg 0.755381 0.755411 0.755383 4026.0  
The result of Model Number:Dataset Number:Featuregroup Number:Rescale of 57 : 0 : 4 :  
1

f1-score precision recall support  
AFIB 0.678178 0.684784 0.671863 204.0  
GSVT 0.693861 0.690675 0.697100 300.0  
SB 0.703449 0.701029 0.705892 892.0  
SR 0.697509 0.700215 0.694857 681.0  
macro avg 0.693249 0.694176 0.692428 2077.0  
micro avg 0.697661 0.697661 0.697661 2077.0  
weighted avg 0.697635 0.697671 0.697661 2077.0  
The result of Model Number:Dataset Number:Featuregroup Number:Rescale of 57 : 0 : 5 :  
0

f1-score precision recall support  
AFIB 0.705343 0.719992 0.691440 875.0  
GSVT 0.687849 0.663959 0.743998 691.0  
SB 0.810738 0.807082 0.814441 1553.0  
SR 0.616361 0.606410 0.626700 907.0  
macro avg 0.705073 0.699361 0.719144 4026.0  
micro avg 0.733322 0.733322 0.733322 4026.0  
weighted avg 0.722949 0.718381 0.733322 4026.0  
The result of Model Number:Dataset Number:Featuregroup Number:Rescale of 57 : 0 : 5 :  
1

f1-score precision recall support  
AFIB 0.844379 0.871444 0.819196 204.0  
GSVT 0.869640 0.854679 0.885263 300.0  
SB 0.884684 0.875938 0.893608 892.0  
SR 0.861029 0.871803 0.850536 681.0  
macro avg 0.864933 0.868466 0.862151 2077.0

micro avg 0.870972 0.870972 0.870972 2077.0  
weighted avg 0.870796 0.871070 0.870972 2077.0  
The result of Model Number:Dataset Number:Featuregroup Number:Rescale of 57 : 0 : 6 :  
0

|              | f1-score | precision | recall   | support |
|--------------|----------|-----------|----------|---------|
| AFIB         | 0.643601 | 0.625058  | 0.706154 | 875.0   |
| GSVT         | 0.709335 | 0.707069  | 0.711706 | 691.0   |
| SB           | 0.598783 | 0.589958  | 0.607924 | 1553.0  |
| SR           | 0.716971 | 0.730965  | 0.703593 | 907.0   |
| macro avg    | 0.667172 | 0.663263  | 0.682344 | 4026.0  |
| micro avg    | 0.668639 | 0.668639  | 0.668639 | 4026.0  |
| weighted avg | 0.654124 | 0.649454  | 0.668639 | 4026.0  |

The result of Model Number:Dataset Number:Featuregroup Number:Rescale of 57 : 0 : 6 :  
1

|              | f1-score | precision | recall   | support |
|--------------|----------|-----------|----------|---------|
| AFIB         | 0.563633 | 0.622586  | 0.515043 | 204.0   |
| GSVT         | 0.663075 | 0.654320  | 0.672138 | 300.0   |
| SB           | 0.703188 | 0.700455  | 0.705947 | 892.0   |
| SR           | 0.686291 | 0.676510  | 0.696366 | 681.0   |
| macro avg    | 0.654047 | 0.663468  | 0.647373 | 2077.0  |
| micro avg    | 0.679172 | 0.679172  | 0.679172 | 2077.0  |
| weighted avg | 0.678147 | 0.678292  | 0.679172 | 2077.0  |

The result of Model Number:Dataset Number:Featuregroup Number:Rescale of 57 : 0 : 7 :  
0

|              | f1-score | precision | recall   | support |
|--------------|----------|-----------|----------|---------|
| AFIB         | 0.702869 | 0.708426  | 0.697423 | 875.0   |
| GSVT         | 0.720556 | 0.719032  | 0.722112 | 691.0   |
| SB           | 0.768133 | 0.761344  | 0.775055 | 1553.0  |
| SR           | 0.747685 | 0.755018  | 0.740511 | 907.0   |
| macro avg    | 0.734811 | 0.735955  | 0.733775 | 4026.0  |
| micro avg    | 0.741313 | 0.741313  | 0.741313 | 4026.0  |
| weighted avg | 0.741176 | 0.741155  | 0.741313 | 4026.0  |

The result of Model Number:Dataset Number:Featuregroup Number:Rescale of 57 : 0 : 7 :  
1

|              | f1-score | precision | recall   | support |
|--------------|----------|-----------|----------|---------|
| AFIB         | 0.647154 | 0.637232  | 0.657499 | 875.0   |
| GSVT         | 0.669469 | 0.676031  | 0.663165 | 691.0   |
| SB           | 0.712494 | 0.710830  | 0.714189 | 1553.0  |
| SR           | 0.694695 | 0.703504  | 0.686120 | 907.0   |
| macro avg    | 0.680953 | 0.681899  | 0.680243 | 4026.0  |
| micro avg    | 0.686787 | 0.686787  | 0.686787 | 4026.0  |
| weighted avg | 0.686899 | 0.687211  | 0.686787 | 4026.0  |

The result of Model Number:Dataset Number:Featuregroup Number:Rescale of 57 : 0 : 8 :  
0

f1-score precision recall support  
AFIB 0.887143 0.893352 0.881052 204.0  
GSVT 0.907784 0.903308 0.912318 300.0  
SB 0.925826 0.924285 0.927383 892.0  
SR 0.916612 0.918788 0.914457 681.0  
macro avg 0.909341 0.909934 0.908803 2077.0  
micro avg 0.916419 0.916419 0.916419 2077.0  
weighted avg 0.916400 0.916415 0.916419 2077.0  
The result of Model Number:Dataset Number:Featuregroup Number:Rescale of 57 : 0 : 8 :  
1

f1-score precision recall support  
AFIB 0.627159 0.583211 0.736480 875.0  
GSVT 0.537870 0.502177 0.608385 691.0  
SB 0.642720 0.637297 0.648251 1553.0  
SR 0.619489 0.634505 0.605383 907.0  
macro avg 0.606810 0.589298 0.649625 4026.0  
micro avg 0.650926 0.650926 0.650926 4026.0  
weighted avg 0.616109 0.601722 0.650926 4026.0  
The result of Model Number:Dataset Number:Featuregroup Number:Rescale of 57 : 0 : 9 :  
0

f1-score precision recall support  
AFIB 0.902200 0.899279 0.905168 875.0  
GSVT 0.912662 0.915497 0.909934 691.0  
SB 0.963006 0.960910 0.965115 1553.0  
SR 0.945247 0.949707 0.940865 907.0  
macro avg 0.930779 0.931348 0.930270 4026.0  
micro avg 0.937152 0.937152 0.937152 4026.0  
weighted avg 0.937149 0.937197 0.937152 4026.0  
The result of Model Number:Dataset Number:Featuregroup Number:Rescale of 57 : 0 : 9 :  
1

f1-score precision recall support  
AFIB 0.706034 0.697797 0.716309 875.0  
GSVT 0.726467 0.717661 0.736076 691.0  
SB 0.737416 0.708952 0.779169 1553.0  
SR 0.585547 0.616434 0.557642 907.0  
macro avg 0.688866 0.685211 0.697299 4026.0  
micro avg 0.708204 0.708204 0.708204 4026.0  
weighted avg 0.694503 0.687179 0.708204 4026.0  
The result of Model Number:Dataset Number:Featuregroup Number:Rescale of 57 : 0 :  
10 : 0

f1-score precision recall support  
AFIB 0.700227 0.701833 0.698703 875.0  
GSVT 0.702668 0.700687 0.704683 691.0  
SB 0.737439 0.731332 0.743658 1553.0

SR 0.715316 0.726051 0.704924 907.0  
macro avg 0.713912 0.714976 0.712992 4026.0  
micro avg 0.718472 0.718472 0.718472 4026.0  
weighted avg 0.718399 0.718471 0.718472 4026.0  
The result of Model Number:Dataset Number:Featuregroup Number:Rescale of 57 : 0 :  
10 : 1

f1-score precision recall support  
AFIB 0.898188 0.915745 0.881449 204.0  
GSVT 0.922868 0.916219 0.929646 300.0  
SB 0.939385 0.935729 0.943071 892.0  
SR 0.929117 0.931746 0.926522 681.0  
macro avg 0.922389 0.924860 0.920172 2077.0  
micro avg 0.929654 0.929654 0.929654 2077.0  
weighted avg 0.929586 0.929642 0.929654 2077.0

The result of Model Number:Dataset Number:Featuregroup Number:Rescale of 57 : 1 : 0 :  
0

f1-score precision recall support  
AFIB 0.662174 0.678064 0.647313 204.0  
GSVT 0.685719 0.681745 0.689823 300.0  
SB 0.700364 0.697795 0.702954 892.0  
SR 0.694278 0.694793 0.693771 681.0  
macro avg 0.685634 0.688099 0.683465 2077.0  
micro avg 0.692582 0.692582 0.692582 2077.0  
weighted avg 0.692502 0.692554 0.692582 2077.0

The result of Model Number:Dataset Number:Featuregroup Number:Rescale of 57 : 1 : 0 :  
1

f1-score precision recall support  
AFIB 0.765011 0.770514 0.759588 875.0  
GSVT 0.763792 0.759219 0.768433 691.0  
SB 0.805689 0.796762 0.814820 1553.0  
SR 0.773121 0.786914 0.759828 907.0  
macro avg 0.776903 0.778352 0.775667 4026.0  
micro avg 0.782465 0.782465 0.782465 4026.0  
weighted avg 0.782320 0.782395 0.782465 4026.0

The result of Model Number:Dataset Number:Featuregroup Number:Rescale of 57 : 1 : 1 :  
0

f1-score precision recall support  
AFIB 0.803520 0.786258 0.821600 875.0  
GSVT 0.832129 0.844197 0.820457 691.0  
SB 0.885834 0.885666 0.886007 1553.0  
SR 0.863633 0.873671 0.853827 907.0  
macro avg 0.846279 0.847448 0.845473 4026.0  
micro avg 0.853508 0.853508 0.853508 4026.0  
weighted avg 0.853725 0.854241 0.853508 4026.0



The result of Model Number:Dataset Number:Featuregroup Number:Rescale of 57 : 1 : 1 : 1

|              | f1-score | precision | recall   | support |
|--------------|----------|-----------|----------|---------|
| AFIB         | 0.901187 | 0.939811  | 0.865955 | 204.0   |
| GSVT         | 0.931470 | 0.917397  | 0.946042 | 300.0   |
| SB           | 0.949945 | 0.940551  | 0.959532 | 892.0   |
| SR           | 0.924209 | 0.932116  | 0.916470 | 681.0   |
| macro avg    | 0.926703 | 0.932468  | 0.922000 | 2077.0  |
| micro avg    | 0.934273 | 0.934273  | 0.934273 | 2077.0  |
| weighted avg | 0.934049 | 0.934368  | 0.934273 | 2077.0  |

The result of Model Number:Dataset Number:Featuregroup Number:Rescale of 57 : 1 : 2 : 0

|              | f1-score | precision | recall   | support |
|--------------|----------|-----------|----------|---------|
| AFIB         | 0.886128 | 0.889177  | 0.883212 | 875.0   |
| GSVT         | 0.902951 | 0.884936  | 0.921878 | 691.0   |
| SB           | 0.955846 | 0.950677  | 0.961077 | 1553.0  |
| SR           | 0.918876 | 0.940240  | 0.898515 | 907.0   |
| macro avg    | 0.915950 | 0.916258  | 0.916170 | 4026.0  |
| micro avg    | 0.923332 | 0.923332  | 0.923332 | 4026.0  |
| weighted avg | 0.923286 | 0.923676  | 0.923332 | 4026.0  |

The result of Model Number:Dataset Number:Featuregroup Number:Rescale of 57 : 1 : 2 : 1

|              | f1-score | precision | recall   | support |
|--------------|----------|-----------|----------|---------|
| AFIB         | 0.775078 | 0.809526  | 0.743550 | 204.0   |
| GSVT         | 0.807377 | 0.801039  | 0.813835 | 300.0   |
| SB           | 0.819710 | 0.813387  | 0.826140 | 892.0   |
| SR           | 0.810641 | 0.811980  | 0.809336 | 681.0   |
| macro avg    | 0.803202 | 0.808983  | 0.798215 | 2077.0  |
| micro avg    | 0.810741 | 0.810741  | 0.810741 | 2077.0  |
| weighted avg | 0.810572 | 0.810763  | 0.810741 | 2077.0  |

The result of Model Number:Dataset Number:Featuregroup Number:Rescale of 57 : 1 : 3 : 0

|              | f1-score | precision | recall   | support |
|--------------|----------|-----------|----------|---------|
| AFIB         | 0.778409 | 0.785413  | 0.771773 | 875.0   |
| GSVT         | 0.794266 | 0.778161  | 0.811239 | 691.0   |
| SB           | 0.842324 | 0.832953  | 0.852009 | 1553.0  |
| SR           | 0.808899 | 0.832944  | 0.786394 | 907.0   |
| macro avg    | 0.805975 | 0.807368  | 0.805354 | 4026.0  |
| micro avg    | 0.812791 | 0.812791  | 0.812791 | 4026.0  |
| weighted avg | 0.812654 | 0.813215  | 0.812791 | 4026.0  |

The result of Model Number:Dataset Number:Featuregroup Number:Rescale of 57 : 1 : 3 : 1

|      | f1-score | precision | recall   | support |
|------|----------|-----------|----------|---------|
| AFIB | 0.704917 | 0.759859  | 0.657712 | 204.0   |

GSVT 0.726413 0.738710 0.714550 300.0  
SB 0.769861 0.762776 0.777103 892.0  
SR 0.739220 0.728501 0.750294 681.0  
macro avg 0.735103 0.747461 0.724915 2077.0  
micro avg 0.747552 0.747552 0.747552 2077.0  
weighted avg 0.747161 0.747775 0.747552 2077.0  
The result of Model Number:Dataset Number:Featuregroup Number:Rescale of 57 : 1 : 4 :  
0

f1-score precision recall support  
AFIB 0.815272 0.851506 0.782108 204.0  
GSVT 0.849245 0.842579 0.856038 300.0  
SB 0.862218 0.855567 0.868982 892.0  
SR 0.852679 0.854087 0.851306 681.0  
macro avg 0.844854 0.850935 0.839608 2077.0  
micro avg 0.852784 0.852784 0.852784 2077.0  
weighted avg 0.852606 0.852807 0.852784 2077.0  
The result of Model Number:Dataset Number:Featuregroup Number:Rescale of 57 : 1 : 4 :  
1

f1-score precision recall support  
AFIB 0.743308 0.743070 0.743584 875.0  
GSVT 0.754385 0.744688 0.764426 691.0  
SB 0.797944 0.796208 0.799690 1553.0  
SR 0.775866 0.787239 0.764829 907.0  
macro avg 0.767876 0.767801 0.768133 4026.0  
micro avg 0.773590 0.773590 0.773590 4026.0  
weighted avg 0.773619 0.773796 0.773590 4026.0  
The result of Model Number:Dataset Number:Featuregroup Number:Rescale of 57 : 1 : 5 :  
0

f1-score precision recall support  
AFIB 0.814678 0.834499 0.795976 204.0  
GSVT 0.824918 0.813562 0.836706 300.0  
SB 0.841575 0.833171 0.850157 892.0  
SR 0.826882 0.837733 0.816332 681.0  
macro avg 0.827013 0.829741 0.824793 2077.0  
micro avg 0.831802 0.831802 0.831802 2077.0  
weighted avg 0.831710 0.831965 0.831802 2077.0  
The result of Model Number:Dataset Number:Featuregroup Number:Rescale of 57 : 1 : 5 :  
1

f1-score precision recall support  
AFIB 0.643015 0.635016 0.651290 875.0  
GSVT 0.663147 0.671451 0.655112 691.0  
SB 0.707485 0.706719 0.708259 1553.0  
SR 0.688404 0.691934 0.684913 907.0  
macro avg 0.675513 0.676280 0.674893 4026.0

micro avg 0.681496 0.681496 0.681496 4026.0  
weighted avg 0.681565 0.681751 0.681496 4026.0  
The result of Model Number:Dataset Number:Featuregroup Number:Rescale of 57 : 1 : 6 :  
0

|              | f1-score | precision | recall   | support |
|--------------|----------|-----------|----------|---------|
| AFIB         | 0.825796 | 0.845244  | 0.807295 | 875.0   |
| GSVT         | 0.870512 | 0.872710  | 0.868382 | 691.0   |
| SB           | 0.946697 | 0.942773  | 0.950658 | 1553.0  |
| SR           | 0.900789 | 0.886602  | 0.915479 | 907.0   |
| macro avg    | 0.885949 | 0.886832  | 0.885453 | 4026.0  |
| micro avg    | 0.897453 | 0.897453  | 0.897453 | 4026.0  |
| weighted avg | 0.897002 | 0.896897  | 0.897453 | 4026.0  |

The result of Model Number:Dataset Number:Featuregroup Number:Rescale of 57 : 1 : 6 :  
1

|              | f1-score | precision | recall   | support |
|--------------|----------|-----------|----------|---------|
| AFIB         | 0.891026 | 0.903978  | 0.878843 | 204.0   |
| GSVT         | 0.910676 | 0.898356  | 0.923413 | 300.0   |
| SB           | 0.924383 | 0.914749  | 0.934228 | 892.0   |
| SR           | 0.906061 | 0.921055  | 0.891564 | 681.0   |
| macro avg    | 0.908037 | 0.909534  | 0.907012 | 2077.0  |
| micro avg    | 0.913237 | 0.913237  | 0.913237 | 2077.0  |
| weighted avg | 0.913120 | 0.913391  | 0.913237 | 2077.0  |

The result of Model Number:Dataset Number:Featuregroup Number:Rescale of 57 : 1 : 7 :  
0

|              | f1-score | precision | recall   | support |
|--------------|----------|-----------|----------|---------|
| AFIB         | 0.750042 | 0.804255  | 0.703192 | 204.0   |
| GSVT         | 0.710445 | 0.714288  | 0.706934 | 300.0   |
| SB           | 0.742074 | 0.697577  | 0.792652 | 892.0   |
| SR           | 0.651597 | 0.703219  | 0.607118 | 681.0   |
| macro avg    | 0.713539 | 0.729835  | 0.702474 | 2077.0  |
| micro avg    | 0.710652 | 0.710652  | 0.710652 | 2077.0  |
| weighted avg | 0.708623 | 0.712318  | 0.710652 | 2077.0  |

The result of Model Number:Dataset Number:Featuregroup Number:Rescale of 57 : 1 : 7 :  
1

|              | f1-score | precision | recall   | support |
|--------------|----------|-----------|----------|---------|
| AFIB         | 0.581085 | 0.642527  | 0.530669 | 204.0   |
| GSVT         | 0.668614 | 0.660876  | 0.676663 | 300.0   |
| SB           | 0.706911 | 0.704004  | 0.709843 | 892.0   |
| SR           | 0.691730 | 0.681484  | 0.702296 | 681.0   |
| macro avg    | 0.662085 | 0.672223  | 0.654868 | 2077.0  |
| micro avg    | 0.684978 | 0.684978  | 0.684978 | 2077.0  |
| weighted avg | 0.684043 | 0.684353  | 0.684978 | 2077.0  |

The result of Model Number:Dataset Number:Featuregroup Number:Rescale of 57 : 1 : 8 :  
0

f1-score precision recall support  
AFIB 0.754592 0.779105 0.731718 204.0  
GSVT 0.768897 0.762014 0.776058 300.0  
SB 0.787180 0.781785 0.792652 892.0  
SR 0.774342 0.777609 0.771148 681.0  
macro avg 0.771253 0.775128 0.767894 2077.0  
micro avg 0.777220 0.777220 0.777220 2077.0  
weighted avg 0.777129 0.777297 0.777220 2077.0  
The result of Model Number:Dataset Number:Featuregroup Number:Rescale of 57 : 1 : 8 :  
1

f1-score precision recall support  
AFIB 0.847201 0.845061 0.849484 875.0  
GSVT 0.863729 0.858981 0.868577 691.0  
SB 0.904393 0.898941 0.909924 1553.0  
SR 0.877728 0.893569 0.862454 907.0  
macro avg 0.873263 0.874138 0.872610 4026.0  
micro avg 0.878998 0.878998 0.878998 4026.0  
weighted avg 0.878976 0.879162 0.878998 4026.0  
The result of Model Number:Dataset Number:Featuregroup Number:Rescale of 57 : 1 : 9 :  
0

f1-score precision recall support  
AFIB 0.619719 0.610388 0.634500 875.0  
GSVT 0.591720 0.589998 0.596768 691.0  
SB 0.631881 0.588812 0.687002 1553.0  
SR 0.468073 0.625675 0.387855 907.0  
macro avg 0.577848 0.603718 0.576531 4026.0  
micro avg 0.592711 0.592711 0.592711 4026.0  
weighted avg 0.585441 0.602010 0.592711 4026.0  
The result of Model Number:Dataset Number:Featuregroup Number:Rescale of 57 : 1 : 9 :  
1

f1-score precision recall support  
AFIB 0.773988 0.768068 0.780103 875.0  
GSVT 0.791797 0.796126 0.787560 691.0  
SB 0.838449 0.837861 0.839043 1553.0  
SR 0.816178 0.820137 0.812299 907.0  
macro avg 0.805103 0.805548 0.804751 4026.0  
micro avg 0.811372 0.811372 0.811372 4026.0  
weighted avg 0.811415 0.811536 0.811372 4026.0  
The result of Model Number:Dataset Number:Featuregroup Number:Rescale of 57 : 1 :  
10 : 0

f1-score precision recall support  
AFIB 0.814688 0.808206 0.821350 875.0  
GSVT 0.782385 0.767509 0.797914 691.0  
SB 0.821141 0.757985 0.895793 1553.0

SR 0.628766 0.803970 0.516377 907.0  
macro avg 0.761745 0.784417 0.757859 4026.0  
micro avg 0.777338 0.777338 0.777338 4026.0  
weighted avg 0.769747 0.780894 0.777338 4026.0  
The result of Model Number:Dataset Number:Featuregroup Number:Rescale of 57 : 1 :  
10 : 1

f1-score precision recall support  
AFIB 0.713401 0.698156 0.729368 875.0  
GSVT 0.738772 0.750069 0.727876 691.0  
SB 0.787529 0.787633 0.787428 1553.0  
SR 0.767241 0.775186 0.759459 907.0  
macro avg 0.751736 0.752761 0.751033 4026.0  
micro avg 0.758287 0.758287 0.758287 4026.0  
weighted avg 0.758479 0.758935 0.758287 4026.0  
The result of Model Number:Dataset Number:Featuregroup Number:Rescale of 58 : 0 : 0 :  
0

f1-score precision recall support  
AFIB 0.703686 0.695348 0.712286 875.0  
GSVT 0.713702 0.720601 0.707003 691.0  
SB 0.757476 0.754578 0.760402 1553.0  
SR 0.739816 0.748351 0.731494 907.0  
macro avg 0.728670 0.729719 0.727796 4026.0  
micro avg 0.734267 0.734267 0.734267 4026.0  
weighted avg 0.734294 0.734471 0.734267 4026.0  
The result of Model Number:Dataset Number:Featuregroup Number:Rescale of 58 : 0 : 0 :  
1

f1-score precision recall support  
AFIB 0.701832 0.720378 0.684286 204.0  
GSVT 0.721080 0.715089 0.727303 300.0  
SB 0.740949 0.738230 0.743690 892.0  
SR 0.729477 0.730361 0.728615 681.0  
macro avg 0.723335 0.726015 0.720974 2077.0  
micro avg 0.730546 0.730546 0.730546 2077.0  
weighted avg 0.730476 0.730554 0.730546 2077.0  
The result of Model Number:Dataset Number:Featuregroup Number:Rescale of 58 : 0 : 1 :  
0

f1-score precision recall support  
AFIB 0.673372 0.698232 0.650284 204.0  
GSVT 0.687765 0.680706 0.695078 300.0  
SB 0.706602 0.703307 0.709929 892.0  
SR 0.695585 0.696021 0.695172 681.0  
macro avg 0.690831 0.694567 0.687616 2077.0  
micro avg 0.697087 0.697087 0.697087 2077.0  
weighted avg 0.697005 0.697155 0.697087 2077.0

The result of Model Number:Dataset Number:Featuregroup Number:Rescale of 58 : 0 : 1 : 1

|              | f1-score | precision | recall   | support |
|--------------|----------|-----------|----------|---------|
| AFIB         | 0.725756 | 0.721693  | 0.729900 | 875.0   |
| GSVT         | 0.731666 | 0.735983  | 0.727445 | 691.0   |
| SB           | 0.770750 | 0.768338  | 0.773180 | 1553.0  |
| SR           | 0.755491 | 0.760489  | 0.750576 | 907.0   |
| macro avg    | 0.745916 | 0.746626  | 0.745275 | 4026.0  |
| micro avg    | 0.750832 | 0.750832  | 0.750832 | 4026.0  |
| weighted avg | 0.750825 | 0.750879  | 0.750832 | 4026.0  |

The result of Model Number:Dataset Number:Featuregroup Number:Rescale of 58 : 0 : 2 : 0

|              | f1-score | precision | recall   | support |
|--------------|----------|-----------|----------|---------|
| AFIB         | 0.672461 | 0.689206  | 0.656542 | 875.0   |
| GSVT         | 0.710503 | 0.713520  | 0.707542 | 691.0   |
| SB           | 0.770670 | 0.767721  | 0.773646 | 1553.0  |
| SR           | 0.733076 | 0.719416  | 0.747305 | 907.0   |
| macro avg    | 0.721677 | 0.722466  | 0.721259 | 4026.0  |
| micro avg    | 0.730915 | 0.730915  | 0.730915 | 4026.0  |
| weighted avg | 0.730529 | 0.730471  | 0.730915 | 4026.0  |

The result of Model Number:Dataset Number:Featuregroup Number:Rescale of 58 : 0 : 2 : 1

|              | f1-score | precision | recall   | support |
|--------------|----------|-----------|----------|---------|
| AFIB         | 0.892279 | 0.909720  | 0.875650 | 204.0   |
| GSVT         | 0.916797 | 0.910191  | 0.923530 | 300.0   |
| SB           | 0.933205 | 0.929573  | 0.936867 | 892.0   |
| SR           | 0.923004 | 0.925616  | 0.920427 | 681.0   |
| macro avg    | 0.916321 | 0.918775  | 0.914118 | 2077.0  |
| micro avg    | 0.923537 | 0.923537  | 0.923537 | 2077.0  |
| weighted avg | 0.923471 | 0.923526  | 0.923537 | 2077.0  |

The result of Model Number:Dataset Number:Featuregroup Number:Rescale of 58 : 0 : 3 : 0

|              | f1-score | precision | recall   | support |
|--------------|----------|-----------|----------|---------|
| AFIB         | 0.762462 | 0.780587  | 0.745244 | 204.0   |
| GSVT         | 0.782256 | 0.779238  | 0.785380 | 300.0   |
| SB           | 0.801640 | 0.799852  | 0.803438 | 892.0   |
| SR           | 0.791555 | 0.789962  | 0.793182 | 681.0   |
| macro avg    | 0.784478 | 0.787410  | 0.781811 | 2077.0  |
| micro avg    | 0.791751 | 0.791751  | 0.791751 | 2077.0  |
| weighted avg | 0.791686 | 0.791739  | 0.791751 | 2077.0  |

The result of Model Number:Dataset Number:Featuregroup Number:Rescale of 58 : 0 : 3 : 1

|      | f1-score | precision | recall   | support |
|------|----------|-----------|----------|---------|
| AFIB | 0.876289 | 0.897317  | 0.856623 | 204.0   |

GSVT 0.907448 0.902188 0.912879 300.0  
SB 0.926828 0.923428 0.930256 892.0  
SR 0.918774 0.919455 0.918104 681.0  
macro avg 0.907335 0.910597 0.904465 2077.0  
micro avg 0.916529 0.916529 0.916529 2077.0  
weighted avg 0.916424 0.916493 0.916529 2077.0  
The result of Model Number:Dataset Number:Featuregroup Number:Rescale of 58 : 0 : 4 :  
0

f1-score precision recall support  
AFIB 0.695801 0.687381 0.704461 875.0  
GSVT 0.705220 0.712450 0.698190 691.0  
SB 0.749015 0.746578 0.751474 1553.0  
SR 0.732632 0.740160 0.725281 907.0  
macro avg 0.720667 0.721642 0.719852 4026.0  
micro avg 0.726210 0.726210 0.726210 4026.0  
weighted avg 0.726242 0.726409 0.726210 4026.0  
The result of Model Number:Dataset Number:Featuregroup Number:Rescale of 58 : 0 : 4 :  
1

f1-score precision recall support  
AFIB 0.845629 0.876849 0.816635 204.0  
GSVT 0.863704 0.854839 0.872888 300.0  
SB 0.887360 0.883222 0.891538 892.0  
SR 0.873524 0.874071 0.873006 681.0  
macro avg 0.867554 0.872245 0.863517 2077.0  
micro avg 0.875411 0.875411 0.875411 2077.0  
weighted avg 0.875308 0.875496 0.875411 2077.0  
The result of Model Number:Dataset Number:Featuregroup Number:Rescale of 58 : 0 : 5 :  
0

f1-score precision recall support  
AFIB 0.870353 0.893877 0.848216 204.0  
GSVT 0.877527 0.864609 0.890957 300.0  
SB 0.894525 0.885009 0.904251 892.0  
SR 0.877934 0.889997 0.866207 681.0  
macro avg 0.880084 0.883373 0.877408 2077.0  
micro avg 0.884353 0.884353 0.884353 2077.0  
weighted avg 0.884256 0.884569 0.884353 2077.0  
The result of Model Number:Dataset Number:Featuregroup Number:Rescale of 58 : 0 : 5 :  
1

f1-score precision recall support  
AFIB 0.883281 0.873419 0.893378 875.0  
GSVT 0.900854 0.909106 0.892765 691.0  
SB 0.960802 0.957674 0.963956 1553.0  
SR 0.935895 0.945270 0.926706 907.0  
macro avg 0.920208 0.921367 0.919201 4026.0

micro avg 0.928006 0.928006 0.928006 4026.0  
weighted avg 0.928054 0.928232 0.928006 4026.0  
The result of Model Number:Dataset Number:Featuregroup Number:Rescale of 58 : 0 : 6 :  
0

|              | f1-score | precision | recall   | support |
|--------------|----------|-----------|----------|---------|
| AFIB         | 0.869408 | 0.858227  | 0.880946 | 875.0   |
| GSVT         | 0.887106 | 0.894450  | 0.879917 | 691.0   |
| SB           | 0.948495 | 0.944273  | 0.952765 | 1553.0  |
| SR           | 0.921502 | 0.935132  | 0.908287 | 907.0   |
| macro avg    | 0.906628 | 0.908020  | 0.905479 | 4026.0  |
| micro avg    | 0.914633 | 0.914633  | 0.914633 | 4026.0  |
| weighted avg | 0.914689 | 0.914961  | 0.914633 | 4026.0  |

The result of Model Number:Dataset Number:Featuregroup Number:Rescale of 58 : 0 : 6 :  
1

|              | f1-score | precision | recall   | support |
|--------------|----------|-----------|----------|---------|
| AFIB         | 0.765205 | 0.755167  | 0.775547 | 875.0   |
| GSVT         | 0.776920 | 0.785556  | 0.768486 | 691.0   |
| SB           | 0.824024 | 0.822079  | 0.825983 | 1553.0  |
| SR           | 0.803393 | 0.810624  | 0.796301 | 907.0   |
| macro avg    | 0.792385 | 0.793356  | 0.791579 | 4026.0  |
| micro avg    | 0.798466 | 0.798466  | 0.798466 | 4026.0  |
| weighted avg | 0.798508 | 0.798687  | 0.798466 | 4026.0  |

The result of Model Number:Dataset Number:Featuregroup Number:Rescale of 58 : 0 : 7 :  
0

|              | f1-score | precision | recall   | support |
|--------------|----------|-----------|----------|---------|
| AFIB         | 0.741345 | 0.747040  | 0.735905 | 204.0   |
| GSVT         | 0.767452 | 0.766716  | 0.768214 | 300.0   |
| SB           | 0.783153 | 0.781329  | 0.784993 | 892.0   |
| SR           | 0.775946 | 0.776991  | 0.774920 | 681.0   |
| macro avg    | 0.766974 | 0.768019  | 0.766008 | 2077.0  |
| micro avg    | 0.774446 | 0.774446  | 0.774446 | 2077.0  |
| weighted avg | 0.774416 | 0.774428  | 0.774446 | 2077.0  |

The result of Model Number:Dataset Number:Featuregroup Number:Rescale of 58 : 0 : 7 :  
1

|              | f1-score | precision | recall   | support |
|--------------|----------|-----------|----------|---------|
| AFIB         | 0.793423 | 0.845119  | 0.748038 | 204.0   |
| GSVT         | 0.828182 | 0.807825  | 0.849703 | 300.0   |
| SB           | 0.852470 | 0.841519  | 0.863739 | 892.0   |
| SR           | 0.830328 | 0.840243  | 0.820700 | 681.0   |
| macro avg    | 0.826101 | 0.833677  | 0.820545 | 2077.0  |
| micro avg    | 0.836236 | 0.836236  | 0.836236 | 2077.0  |
| weighted avg | 0.835903 | 0.836588  | 0.836236 | 2077.0  |

The result of Model Number:Dataset Number:Featuregroup Number:Rescale of 58 : 0 : 8 :  
0



f1-score precision recall support  
AFIB 0.761518 0.776403 0.747326 204.0  
GSVT 0.782443 0.776805 0.788189 300.0  
SB 0.796446 0.793347 0.799571 892.0  
SR 0.787741 0.789970 0.785541 681.0  
macro avg 0.782037 0.784131 0.780157 2077.0  
micro avg 0.788196 0.788196 0.788196 2077.0  
weighted avg 0.788138 0.788186 0.788196 2077.0  
The result of Model Number:Dataset Number:Featuregroup Number:Rescale of 58 : 0 : 8 :  
1

f1-score precision recall support  
AFIB 0.817582 0.836213 0.799893 875.0  
GSVT 0.870012 0.871731 0.868590 691.0  
SB 0.951851 0.946641 0.957121 1553.0  
SR 0.899642 0.888729 0.910951 907.0  
macro avg 0.884772 0.885829 0.884139 4026.0  
micro avg 0.897353 0.897353 0.897353 4026.0  
weighted avg 0.896861 0.896737 0.897353 4026.0  
The result of Model Number:Dataset Number:Featuregroup Number:Rescale of 58 : 0 : 9 :  
0

f1-score precision recall support  
AFIB 0.687660 0.670063 0.706270 875.0  
GSVT 0.650051 0.686894 0.617110 691.0  
SB 0.689282 0.634305 0.754710 1553.0  
SR 0.550619 0.668799 0.468033 907.0  
macro avg 0.644403 0.665015 0.636531 4026.0  
micro avg 0.655981 0.655981 0.655981 4026.0  
weighted avg 0.650957 0.658874 0.655981 4026.0  
The result of Model Number:Dataset Number:Featuregroup Number:Rescale of 58 : 0 : 9 :  
1

f1-score precision recall support  
AFIB 0.704530 0.686022 0.748635 875.0  
GSVT 0.677751 0.641500 0.772622 691.0  
SB 0.642204 0.638146 0.646334 1553.0  
SR 0.623800 0.634548 0.613584 907.0  
macro avg 0.662071 0.650054 0.695294 4026.0  
micro avg 0.682865 0.682865 0.682865 4026.0  
weighted avg 0.657705 0.648316 0.682865 4026.0  
The result of Model Number:Dataset Number:Featuregroup Number:Rescale of 58 : 0 :  
10 : 0

f1-score precision recall support  
AFIB 0.672889 0.679099 0.666828 875.0  
GSVT 0.688601 0.686743 0.690494 691.0  
SB 0.733370 0.726477 0.740403 1553.0

SR 0.713108 0.720263 0.706107 907.0  
macro avg 0.701992 0.703145 0.700958 4026.0  
micro avg 0.708120 0.708120 0.708120 4026.0  
weighted avg 0.707977 0.707960 0.708120 4026.0  
The result of Model Number:Dataset Number:Featuregroup Number:Rescale of 58 : 0 :  
10 : 1

f1-score precision recall support  
AFIB 0.869073 0.877959 0.860438 875.0  
GSVT 0.868812 0.855389 0.882764 691.0  
SB 0.916480 0.911007 0.922027 1553.0  
SR 0.892222 0.904164 0.880618 907.0  
macro avg 0.886647 0.887130 0.886462 4026.0  
micro avg 0.892574 0.892574 0.892574 4026.0  
weighted avg 0.892530 0.892737 0.892574 4026.0  
The result of Model Number:Dataset Number:Featuregroup Number:Rescale of 58 : 1 : 0 :  
0

f1-score precision recall support  
AFIB 0.680455 0.699604 0.662466 204.0  
GSVT 0.698047 0.693147 0.703148 300.0  
SB 0.717243 0.714373 0.720137 892.0  
SR 0.707709 0.708152 0.707288 681.0  
macro avg 0.700863 0.703819 0.698260 2077.0  
micro avg 0.707806 0.707806 0.707806 2077.0  
weighted avg 0.707731 0.707817 0.707806 2077.0  
The result of Model Number:Dataset Number:Featuregroup Number:Rescale of 58 : 1 : 0 :  
1

f1-score precision recall support  
AFIB 0.751423 0.767928 0.735893 204.0  
GSVT 0.775639 0.769370 0.782118 300.0  
SB 0.791895 0.790921 0.792872 892.0  
SR 0.785210 0.784527 0.785899 681.0  
macro avg 0.776042 0.778187 0.774195 2077.0  
micro avg 0.783436 0.783436 0.783436 2077.0  
weighted avg 0.783380 0.783454 0.783436 2077.0  
The result of Model Number:Dataset Number:Featuregroup Number:Rescale of 58 : 1 : 1 :  
0

f1-score precision recall support  
AFIB 0.903143 0.911473 0.895182 204.0  
GSVT 0.936161 0.936194 0.936153 300.0  
SB 0.955767 0.954069 0.957479 892.0  
SR 0.945623 0.945370 0.945900 681.0  
macro avg 0.935173 0.936777 0.933678 2077.0  
micro avg 0.944483 0.944483 0.944483 2077.0  
weighted avg 0.944441 0.944451 0.944483 2077.0

The result of Model Number:Dataset Number:Featuregroup Number:Rescale of 58 : 1 : 1 : 1

|              | f1-score | precision | recall   | support |
|--------------|----------|-----------|----------|---------|
| AFIB         | 0.716582 | 0.718049  | 0.715200 | 204.0   |
| GSVT         | 0.732343 | 0.729497  | 0.735263 | 300.0   |
| SB           | 0.748601 | 0.747602  | 0.749607 | 892.0   |
| SR           | 0.743102 | 0.745299  | 0.740921 | 681.0   |
| macro avg    | 0.735157 | 0.735112  | 0.735248 | 2077.0  |
| micro avg    | 0.741308 | 0.741308  | 0.741308 | 2077.0  |
| weighted avg | 0.741305 | 0.741329  | 0.741308 | 2077.0  |

The result of Model Number:Dataset Number:Featuregroup Number:Rescale of 58 : 1 : 2 : 0

|              | f1-score | precision | recall   | support |
|--------------|----------|-----------|----------|---------|
| AFIB         | 0.902653 | 0.910979  | 0.894697 | 204.0   |
| GSVT         | 0.935654 | 0.935687  | 0.935645 | 300.0   |
| SB           | 0.955249 | 0.953552  | 0.956960 | 892.0   |
| SR           | 0.945111 | 0.944858  | 0.945387 | 681.0   |
| macro avg    | 0.934667 | 0.936269  | 0.933172 | 2077.0  |
| micro avg    | 0.943971 | 0.943971  | 0.943971 | 2077.0  |
| weighted avg | 0.943929 | 0.943940  | 0.943971 | 2077.0  |

The result of Model Number:Dataset Number:Featuregroup Number:Rescale of 58 : 1 : 2 : 1

|              | f1-score | precision | recall   | support |
|--------------|----------|-----------|----------|---------|
| AFIB         | 0.686400 | 0.686584  | 0.686337 | 875.0   |
| GSVT         | 0.698353 | 0.695775  | 0.701038 | 691.0   |
| SB           | 0.747102 | 0.745288  | 0.748928 | 1553.0  |
| SR           | 0.729284 | 0.734518  | 0.724144 | 907.0   |
| macro avg    | 0.715285 | 0.715541  | 0.715112 | 4026.0  |
| micro avg    | 0.721522 | 0.721522  | 0.721522 | 4026.0  |
| weighted avg | 0.721528 | 0.721605  | 0.721522 | 4026.0  |

The result of Model Number:Dataset Number:Featuregroup Number:Rescale of 58 : 1 : 3 : 0

|              | f1-score | precision | recall   | support |
|--------------|----------|-----------|----------|---------|
| AFIB         | 0.747704 | 0.747837  | 0.747603 | 875.0   |
| GSVT         | 0.755615 | 0.758167  | 0.753127 | 691.0   |
| SB           | 0.793734 | 0.790998  | 0.796494 | 1553.0  |
| SR           | 0.778662 | 0.781288  | 0.776082 | 907.0   |
| macro avg    | 0.768929 | 0.769573  | 0.768326 | 4026.0  |
| micro avg    | 0.773826 | 0.773826  | 0.773826 | 4026.0  |
| weighted avg | 0.773792 | 0.773795  | 0.773826 | 4026.0  |

The result of Model Number:Dataset Number:Featuregroup Number:Rescale of 58 : 1 : 3 : 1

|      | f1-score | precision | recall   | support |
|------|----------|-----------|----------|---------|
| AFIB | 0.761490 | 0.761626  | 0.761387 | 875.0   |

GSVT 0.769546 0.772146 0.767013 691.0  
SB 0.808369 0.805582 0.811179 1553.0  
SR 0.793019 0.795693 0.790391 907.0  
macro avg 0.783106 0.783762 0.782493 4026.0  
micro avg 0.788094 0.788094 0.788094 4026.0  
weighted avg 0.788059 0.788062 0.788094 4026.0  
The result of Model Number:Dataset Number:Featuregroup Number:Rescale of 58 : 1 : 4 :  
0

f1-score precision recall support  
AFIB 0.707315 0.700380 0.756261 204.0  
GSVT 0.634217 0.627165 0.641587 300.0  
SB 0.815008 0.809073 0.821036 892.0  
SR 0.801339 0.806889 0.795930 681.0  
macro avg 0.739470 0.735877 0.753704 2077.0  
micro avg 0.780523 0.780523 0.780523 2077.0  
weighted avg 0.773836 0.771407 0.780523 2077.0  
The result of Model Number:Dataset Number:Featuregroup Number:Rescale of 58 : 1 : 4 :  
1

f1-score precision recall support  
AFIB 0.789118 0.803620 0.775227 204.0  
GSVT 0.802373 0.797118 0.807719 300.0  
SB 0.816098 0.812113 0.820123 892.0  
SR 0.807662 0.811021 0.804344 681.0  
macro avg 0.803813 0.805968 0.801853 2077.0  
micro avg 0.808748 0.808748 0.808748 2077.0  
weighted avg 0.808700 0.808755 0.808748 2077.0  
The result of Model Number:Dataset Number:Featuregroup Number:Rescale of 58 : 1 : 5 :  
0

f1-score precision recall support  
AFIB 0.676398 0.672611 0.680260 875.0  
GSVT 0.681906 0.685929 0.677971 691.0  
SB 0.718332 0.716083 0.720596 1553.0  
SR 0.704111 0.708769 0.699530 907.0  
macro avg 0.695186 0.695848 0.694589 4026.0  
micro avg 0.699768 0.699768 0.699768 4026.0  
weighted avg 0.699762 0.699812 0.699768 4026.0  
The result of Model Number:Dataset Number:Featuregroup Number:Rescale of 58 : 1 : 5 :  
1

f1-score precision recall support  
AFIB 0.788829 0.806238 0.772215 204.0  
GSVT 0.806069 0.792702 0.819991 300.0  
SB 0.821558 0.815132 0.828095 892.0  
SR 0.801620 0.811268 0.792200 681.0  
macro avg 0.804519 0.806335 0.803125 2077.0

micro avg 0.809667 0.809667 0.809667 2077.0  
weighted avg 0.809569 0.809752 0.809667 2077.0  
The result of Model Number:Dataset Number:Featuregroup Number:Rescale of 58 : 1 : 6 :  
0

|              | f1-score | precision | recall   | support |
|--------------|----------|-----------|----------|---------|
| AFIB         | 0.742452 | 0.740931  | 0.744518 | 875.0   |
| GSVT         | 0.752580 | 0.744680  | 0.760785 | 691.0   |
| SB           | 0.793719 | 0.783002  | 0.804889 | 1553.0  |
| SR           | 0.755097 | 0.783893  | 0.728513 | 907.0   |
| macro avg    | 0.760962 | 0.763127  | 0.759676 | 4026.0  |
| micro avg    | 0.766992 | 0.766992  | 0.766992 | 4026.0  |
| weighted avg | 0.766815 | 0.767482  | 0.766992 | 4026.0  |

The result of Model Number:Dataset Number:Featuregroup Number:Rescale of 58 : 1 : 6 :  
1

|              | f1-score | precision | recall   | support |
|--------------|----------|-----------|----------|---------|
| AFIB         | 0.679646 | 0.681334  | 0.678012 | 875.0   |
| GSVT         | 0.691350 | 0.693427  | 0.689373 | 691.0   |
| SB           | 0.733398 | 0.728420  | 0.738450 | 1553.0  |
| SR           | 0.719442 | 0.724783  | 0.714207 | 907.0   |
| macro avg    | 0.705959 | 0.706991  | 0.705011 | 4026.0  |
| micro avg    | 0.711430 | 0.711430  | 0.711430 | 4026.0  |
| weighted avg | 0.711355 | 0.711361  | 0.711430 | 4026.0  |

The result of Model Number:Dataset Number:Featuregroup Number:Rescale of 58 : 1 : 7 :  
0

|              | f1-score | precision | recall   | support |
|--------------|----------|-----------|----------|---------|
| AFIB         | 0.780342 | 0.786510  | 0.774295 | 875.0   |
| GSVT         | 0.799977 | 0.798286  | 0.801706 | 691.0   |
| SB           | 0.852799 | 0.845262  | 0.860483 | 1553.0  |
| SR           | 0.830097 | 0.838238  | 0.822132 | 907.0   |
| macro avg    | 0.815804 | 0.817074  | 0.814654 | 4026.0  |
| micro avg    | 0.823023 | 0.823023  | 0.823023 | 4026.0  |
| weighted avg | 0.822871 | 0.822848  | 0.823023 | 4026.0  |

The result of Model Number:Dataset Number:Featuregroup Number:Rescale of 58 : 1 : 7 :  
1

|              | f1-score | precision | recall   | support |
|--------------|----------|-----------|----------|---------|
| AFIB         | 0.814536 | 0.816802  | 0.812325 | 875.0   |
| GSVT         | 0.833194 | 0.832963  | 0.833434 | 691.0   |
| SB           | 0.887378 | 0.879037  | 0.895888 | 1553.0  |
| SR           | 0.863865 | 0.876323  | 0.851767 | 907.0   |
| macro avg    | 0.849743 | 0.851281  | 0.848353 | 4026.0  |
| micro avg    | 0.857067 | 0.857067  | 0.857067 | 4026.0  |
| weighted avg | 0.856950 | 0.856992  | 0.857067 | 4026.0  |

The result of Model Number:Dataset Number:Featuregroup Number:Rescale of 58 : 1 : 8 :  
0

f1-score precision recall support  
AFIB 0.634110 0.707230 0.574776 204.0  
GSVT 0.747680 0.734666 0.761323 300.0  
SB 0.798292 0.794753 0.801870 892.0  
SR 0.779766 0.769104 0.790751 681.0  
macro avg 0.739962 0.751438 0.732180 2077.0  
micro avg 0.770063 0.770063 0.770063 2077.0  
weighted avg 0.768782 0.769068 0.770063 2077.0  
The result of Model Number:Dataset Number:Featuregroup Number:Rescale of 58 : 1 : 8 :  
1

f1-score precision recall support  
AFIB 0.752687 0.763628 0.742395 204.0  
GSVT 0.769286 0.758879 0.780045 300.0  
SB 0.780864 0.772726 0.789181 892.0  
SR 0.765388 0.778053 0.753141 681.0  
macro avg 0.767056 0.768322 0.766191 2077.0  
micro avg 0.771450 0.771450 0.771450 2077.0  
weighted avg 0.771350 0.771579 0.771450 2077.0  
The result of Model Number:Dataset Number:Featuregroup Number:Rescale of 58 : 1 : 9 :  
0

f1-score precision recall support  
AFIB 0.626473 0.690100 0.574189 204.0  
GSVT 0.578544 0.618551 0.543669 300.0  
SB 0.629863 0.588528 0.677454 892.0  
SR 0.545157 0.573813 0.519376 681.0  
macro avg 0.595009 0.617748 0.578672 2077.0  
micro avg 0.596157 0.596157 0.596157 2077.0  
weighted avg 0.594345 0.598016 0.596157 2077.0  
The result of Model Number:Dataset Number:Featuregroup Number:Rescale of 58 : 1 : 9 :  
1

f1-score precision recall support  
AFIB 0.879562 0.908134 0.852899 204.0  
GSVT 0.896236 0.888213 0.904582 300.0  
SB 0.917547 0.911258 0.923925 892.0  
SR 0.902583 0.906391 0.898860 681.0  
macro avg 0.898982 0.903499 0.895067 2077.0  
micro avg 0.905937 0.905937 0.905937 2077.0  
weighted avg 0.905832 0.906027 0.905937 2077.0  
The result of Model Number:Dataset Number:Featuregroup Number:Rescale of 58 : 1 :  
10 : 0

f1-score precision recall support  
AFIB 0.824833 0.827618 0.822096 875.0  
GSVT 0.822655 0.816860 0.828607 691.0  
SB 0.865584 0.857550 0.873776 1553.0

SR 0.832676 0.848723 0.817266 907.0  
macro avg 0.836437 0.837688 0.835436 4026.0  
micro avg 0.842060 0.842060 0.842060 4026.0  
weighted avg 0.841946 0.842073 0.842060 4026.0  
The result of Model Number:Dataset Number:Featuregroup Number:Rescale of 58 : 1 :

10 : 1

f1-score precision recall support

AFIB 0.751688 0.750472 0.752975 875.0  
GSVT 0.758576 0.761593 0.755622 691.0  
SB 0.796637 0.793741 0.799560 1553.0  
SR 0.783606 0.787571 0.779726 907.0  
macro avg 0.772627 0.773344 0.771971 4026.0  
micro avg 0.777426 0.777426 0.777426 4026.0  
weighted avg 0.777400 0.777429 0.777426 4026.0

The result of Model Number:Dataset Number:Featuregroup Number:Rescale of 59 : 0 : 0 : 0

f1-score precision recall support

AFIB 0.681862 0.698452 0.666209 204.0  
GSVT 0.690433 0.680928 0.700299 300.0  
SB 0.704374 0.697340 0.711557 892.0  
SR 0.692076 0.701158 0.683246 681.0  
macro avg 0.692186 0.694470 0.690328 2077.0  
micro avg 0.696194 0.696194 0.696194 2077.0  
weighted avg 0.696117 0.696331 0.696194 2077.0

The result of Model Number:Dataset Number:Featuregroup Number:Rescale of 59 : 0 : 0 : 1

f1-score precision recall support

AFIB 0.731293 0.739076 0.724076 204.0  
GSVT 0.752784 0.747768 0.758088 300.0  
SB 0.768692 0.768005 0.769381 892.0  
SR 0.762210 0.763227 0.761201 681.0  
macro avg 0.753745 0.754519 0.753187 2077.0  
micro avg 0.760618 0.760618 0.760618 2077.0  
weighted avg 0.760596 0.760674 0.760618 2077.0

The result of Model Number:Dataset Number:Featuregroup Number:Rescale of 59 : 0 : 1 : 0

f1-score precision recall support

AFIB 0.674520 0.704979 0.646805 204.0  
GSVT 0.697981 0.690142 0.706127 300.0  
SB 0.671431 0.642158 0.718441 892.0  
SR 0.559395 0.564164 0.554800 681.0  
macro avg 0.650832 0.650361 0.656543 2077.0  
micro avg 0.655972 0.655972 0.655972 2077.0  
weighted avg 0.638835 0.629687 0.655972 2077.0

The result of Model Number:Dataset Number:Featuregroup Number:Rescale of 59 : 0 : 1 :  
1

|              | f1-score | precision | recall   | support |
|--------------|----------|-----------|----------|---------|
| AFIB         | 0.784038 | 0.819443  | 0.751823 | 204.0   |
| GSVT         | 0.811308 | 0.802196  | 0.820777 | 300.0   |
| SB           | 0.780448 | 0.746422  | 0.835091 | 892.0   |
| SR           | 0.650220 | 0.655765  | 0.644880 | 681.0   |
| macro avg    | 0.756504 | 0.755956  | 0.763143 | 2077.0  |
| micro avg    | 0.762479 | 0.762479  | 0.762479 | 2077.0  |
| weighted avg | 0.742560 | 0.731926  | 0.762479 | 2077.0  |

The result of Model Number:Dataset Number:Featuregroup Number:Rescale of 59 : 0 : 2 :  
0

|              | f1-score | precision | recall   | support |
|--------------|----------|-----------|----------|---------|
| AFIB         | 0.809330 | 0.822473  | 0.796644 | 875.0   |
| GSVT         | 0.860746 | 0.863444  | 0.858118 | 691.0   |
| SB           | 0.936449 | 0.933222  | 0.939703 | 1553.0  |
| SR           | 0.886544 | 0.876669  | 0.896697 | 907.0   |
| macro avg    | 0.873267 | 0.873952  | 0.872791 | 4026.0  |
| micro avg    | 0.884920 | 0.884920  | 0.884920 | 4026.0  |
| weighted avg | 0.884585 | 0.884435  | 0.884920 | 4026.0  |

The result of Model Number:Dataset Number:Featuregroup Number:Rescale of 59 : 0 : 2 :  
1

|              | f1-score | precision | recall   | support |
|--------------|----------|-----------|----------|---------|
| AFIB         | 0.827295 | 0.816216  | 0.838733 | 875.0   |
| GSVT         | 0.845793 | 0.852394  | 0.839307 | 691.0   |
| SB           | 0.897995 | 0.895186  | 0.900828 | 1553.0  |
| SR           | 0.876280 | 0.887897  | 0.864978 | 907.0   |
| macro avg    | 0.861841 | 0.862923  | 0.860961 | 4026.0  |
| micro avg    | 0.868697 | 0.868697  | 0.868697 | 4026.0  |
| weighted avg | 0.868778 | 0.869036  | 0.868697 | 4026.0  |

The result of Model Number:Dataset Number:Featuregroup Number:Rescale of 59 : 0 : 3 :  
0

|              | f1-score | precision | recall   | support |
|--------------|----------|-----------|----------|---------|
| AFIB         | 0.854033 | 0.874477  | 0.835774 | 204.0   |
| GSVT         | 0.879183 | 0.866795  | 0.892297 | 300.0   |
| SB           | 0.902026 | 0.892862  | 0.911422 | 892.0   |
| SR           | 0.880467 | 0.893180  | 0.868180 | 681.0   |
| macro avg    | 0.878927 | 0.881828  | 0.876918 | 2077.0  |
| micro avg    | 0.887051 | 0.887051  | 0.887051 | 2077.0  |
| weighted avg | 0.886944 | 0.887395  | 0.887051 | 2077.0  |

The result of Model Number:Dataset Number:Featuregroup Number:Rescale of 59 : 0 : 3 :  
1

|      | f1-score | precision | recall   | support |
|------|----------|-----------|----------|---------|
| AFIB | 0.661988 | 0.678497  | 0.646313 | 875.0   |



GSVT 0.704239 0.706939 0.701593 691.0  
SB 0.762632 0.758939 0.766363 1553.0  
SR 0.722636 0.710591 0.735143 907.0  
macro avg 0.712874 0.713742 0.712353 4026.0  
micro avg 0.722121 0.722121 0.722121 4026.0  
weighted avg 0.721725 0.721639 0.722121 4026.0  
The result of Model Number:Dataset Number:Featuregroup Number:Rescale of 59 : 0 : 4 :  
0

f1-score precision recall support  
AFIB 0.669619 0.670971 0.668287 204.0  
GSVT 0.688249 0.686203 0.690311 300.0  
SB 0.699653 0.699029 0.700280 892.0  
SR 0.693639 0.694971 0.692321 681.0  
macro avg 0.687790 0.687794 0.687800 2077.0  
micro avg 0.693088 0.693088 0.693088 2077.0  
weighted avg 0.693084 0.693090 0.693088 2077.0  
The result of Model Number:Dataset Number:Featuregroup Number:Rescale of 59 : 0 : 4 :  
1

f1-score precision recall support  
AFIB 0.841811 0.857433 0.826956 204.0  
GSVT 0.860321 0.855810 0.864897 300.0  
SB 0.874056 0.870949 0.877190 892.0  
SR 0.865057 0.866617 0.863541 681.0  
macro avg 0.860311 0.862702 0.858146 2077.0  
micro avg 0.866006 0.866006 0.866006 2077.0  
weighted avg 0.865955 0.866014 0.866006 2077.0  
The result of Model Number:Dataset Number:Featuregroup Number:Rescale of 59 : 0 : 5 :  
0

f1-score precision recall support  
AFIB 0.806622 0.804290 0.809041 875.0  
GSVT 0.821572 0.820904 0.822298 691.0  
SB 0.872629 0.869014 0.876280 1553.0  
SR 0.846431 0.855730 0.837378 907.0  
macro avg 0.836813 0.837485 0.836249 4026.0  
micro avg 0.843637 0.843637 0.843637 4026.0  
weighted avg 0.843618 0.843697 0.843637 4026.0  
The result of Model Number:Dataset Number:Featuregroup Number:Rescale of 59 : 0 : 5 :  
1

f1-score precision recall support  
AFIB 0.681742 0.683556 0.679980 875.0  
GSVT 0.694852 0.689957 0.699858 691.0  
SB 0.734541 0.727051 0.742200 1553.0  
SR 0.700964 0.716232 0.686358 907.0  
macro avg 0.703025 0.704199 0.702099 4026.0

micro avg 0.708830 0.708830 0.708830 4026.0  
weighted avg 0.708689 0.708794 0.708830 4026.0  
The result of Model Number:Dataset Number:Featuregroup Number:Rescale of 59 : 0 : 6 :  
0

|              | f1-score | precision | recall   | support |
|--------------|----------|-----------|----------|---------|
| AFIB         | 0.783354 | 0.787653  | 0.779151 | 875.0   |
| GSVT         | 0.784449 | 0.774532  | 0.794747 | 691.0   |
| SB           | 0.824984 | 0.821674  | 0.828329 | 1553.0  |
| SR           | 0.807274 | 0.817074  | 0.797757 | 907.0   |
| macro avg    | 0.800015 | 0.800233  | 0.799996 | 4026.0  |
| micro avg    | 0.804989 | 0.804989  | 0.804989 | 4026.0  |
| weighted avg | 0.804989 | 0.805152  | 0.804989 | 4026.0  |

The result of Model Number:Dataset Number:Featuregroup Number:Rescale of 59 : 0 : 6 :  
1

|              | f1-score | precision | recall   | support |
|--------------|----------|-----------|----------|---------|
| AFIB         | 0.757084 | 0.780402  | 0.735270 | 204.0   |
| GSVT         | 0.776398 | 0.766894  | 0.786226 | 300.0   |
| SB           | 0.797486 | 0.792748  | 0.802308 | 892.0   |
| SR           | 0.784044 | 0.787911  | 0.780245 | 681.0   |
| macro avg    | 0.778753 | 0.781988  | 0.776012 | 2077.0  |
| micro avg    | 0.786167 | 0.786167  | 0.786167 | 2077.0  |
| weighted avg | 0.786065 | 0.786215  | 0.786167 | 2077.0  |

The result of Model Number:Dataset Number:Featuregroup Number:Rescale of 59 : 0 : 7 :  
0

|              | f1-score | precision | recall   | support |
|--------------|----------|-----------|----------|---------|
| AFIB         | 0.928951 | 0.938000  | 0.920301 | 204.0   |
| GSVT         | 0.950433 | 0.946069  | 0.954870 | 300.0   |
| SB           | 0.963567 | 0.960252  | 0.966912 | 892.0   |
| SR           | 0.955430 | 0.959136  | 0.951797 | 681.0   |
| macro avg    | 0.949595 | 0.950864  | 0.948470 | 2077.0  |
| micro avg    | 0.955639 | 0.955639  | 0.955639 | 2077.0  |
| weighted avg | 0.955602 | 0.955652  | 0.955639 | 2077.0  |

The result of Model Number:Dataset Number:Featuregroup Number:Rescale of 59 : 0 : 7 :  
1

|              | f1-score | precision | recall   | support |
|--------------|----------|-----------|----------|---------|
| AFIB         | 0.754519 | 0.743158  | 0.772515 | 875.0   |
| GSVT         | 0.720430 | 0.718333  | 0.726575 | 691.0   |
| SB           | 0.769326 | 0.716889  | 0.836437 | 1553.0  |
| SR           | 0.569888 | 0.761771  | 0.472221 | 907.0   |
| macro avg    | 0.703541 | 0.735038  | 0.701937 | 4026.0  |
| micro avg    | 0.721636 | 0.721636  | 0.721636 | 4026.0  |
| weighted avg | 0.712785 | 0.732958  | 0.721636 | 4026.0  |

The result of Model Number:Dataset Number:Featuregroup Number:Rescale of 59 : 0 : 8 :  
0

f1-score precision recall support  
AFIB 0.741894 0.740701 0.743395 875.0  
GSVT 0.759192 0.755235 0.763235 691.0  
SB 0.793775 0.787050 0.800622 1553.0  
SR 0.763473 0.780446 0.747480 907.0  
macro avg 0.764584 0.765858 0.763683 4026.0  
micro avg 0.769795 0.769795 0.769795 4026.0  
weighted avg 0.769737 0.770028 0.769795 4026.0  
The result of Model Number:Dataset Number:Featuregroup Number:Rescale of 59 : 0 : 8 :  
1

f1-score precision recall support  
AFIB 0.769906 0.770043 0.769802 875.0  
GSVT 0.778051 0.780679 0.775489 691.0  
SB 0.817302 0.814485 0.820144 1553.0  
SR 0.801783 0.804487 0.799126 907.0  
macro avg 0.791760 0.792423 0.791140 4026.0  
micro avg 0.796803 0.796803 0.796803 4026.0  
weighted avg 0.796768 0.796771 0.796803 4026.0  
The result of Model Number:Dataset Number:Featuregroup Number:Rescale of 59 : 0 : 9 :  
0

f1-score precision recall support  
AFIB 0.765064 0.786595 0.744838 204.0  
GSVT 0.784844 0.779335 0.790579 300.0  
SB 0.806427 0.803200 0.809681 892.0  
SR 0.795708 0.796205 0.795234 681.0  
macro avg 0.788011 0.791334 0.785083 2077.0  
micro avg 0.795816 0.795816 0.795816 2077.0  
weighted avg 0.795732 0.795828 0.795816 2077.0  
The result of Model Number:Dataset Number:Featuregroup Number:Rescale of 59 : 0 : 9 :  
1

f1-score precision recall support  
AFIB 0.811453 0.847065 0.778919 204.0  
GSVT 0.755410 0.760849 0.750358 300.0  
SB 0.783420 0.744079 0.827156 892.0  
SR 0.695016 0.740904 0.654627 681.0  
macro avg 0.761325 0.773224 0.752765 2077.0  
micro avg 0.754757 0.754757 0.754757 2077.0  
weighted avg 0.753142 0.755575 0.754757 2077.0  
The result of Model Number:Dataset Number:Featuregroup Number:Rescale of 59 : 0 :  
10 : 0

f1-score precision recall support  
AFIB 0.675165 0.668836 0.681702 875.0  
GSVT 0.640121 0.624735 0.687178 691.0  
SB 0.740181 0.737463 0.742939 1553.0

SR 0.575699 0.579737 0.571726 907.0  
macro avg 0.657792 0.652693 0.670886 4026.0  
micro avg 0.681488 0.681488 0.681488 4026.0  
weighted avg 0.671821 0.667666 0.681488 4026.0  
The result of Model Number:Dataset Number:Featuregroup Number:Rescale of 59 : 0 :  
10 : 1

f1-score precision recall support  
AFIB 0.786149 0.845246 0.735594 204.0  
GSVT 0.749726 0.773524 0.727463 300.0  
SB 0.781108 0.742456 0.824012 892.0  
SR 0.691456 0.721177 0.664159 681.0  
macro avg 0.752110 0.770601 0.737807 2077.0  
micro avg 0.748970 0.748970 0.748970 2077.0  
weighted avg 0.747676 0.750062 0.748970 2077.0

The result of Model Number:Dataset Number:Featuregroup Number:Rescale of 59 : 1 : 0 :  
0

f1-score precision recall support  
AFIB 0.775391 0.814132 0.740559 204.0  
GSVT 0.798767 0.783964 0.814418 300.0  
SB 0.817047 0.808811 0.825469 892.0  
SR 0.794387 0.801483 0.787488 681.0  
macro avg 0.796398 0.802097 0.791983 2077.0  
micro avg 0.803080 0.803080 0.803080 2077.0  
weighted avg 0.802885 0.803342 0.803080 2077.0

The result of Model Number:Dataset Number:Featuregroup Number:Rescale of 59 : 1 : 0 :  
1

f1-score precision recall support  
AFIB 0.701112 0.711862 0.690797 204.0  
GSVT 0.717736 0.711647 0.723961 300.0  
SB 0.730222 0.727865 0.732596 892.0  
SR 0.722718 0.725401 0.720064 681.0  
macro avg 0.717947 0.719194 0.716855 2077.0  
micro avg 0.723134 0.723134 0.723134 2077.0  
weighted avg 0.723099 0.723143 0.723134 2077.0

The result of Model Number:Dataset Number:Featuregroup Number:Rescale of 59 : 1 : 1 :  
0

f1-score precision recall support  
AFIB 0.745967 0.760996 0.731998 204.0  
GSVT 0.769903 0.763719 0.776335 300.0  
SB 0.786570 0.785778 0.787364 892.0  
SR 0.779400 0.778953 0.779857 681.0  
macro avg 0.770460 0.772362 0.768889 2077.0  
micro avg 0.777872 0.777872 0.777872 2077.0  
weighted avg 0.777824 0.777920 0.777872 2077.0

The result of Model Number:Dataset Number:Featuregroup Number:Rescale of 59 : 1 : 1 : 1

|              | f1-score | precision | recall   | support |
|--------------|----------|-----------|----------|---------|
| AFIB         | 0.740834 | 0.740470  | 0.741256 | 875.0   |
| GSVT         | 0.756916 | 0.753192  | 0.760725 | 691.0   |
| SB           | 0.791748 | 0.786572  | 0.796998 | 1553.0  |
| SR           | 0.769209 | 0.781739  | 0.757096 | 907.0   |
| macro avg    | 0.764677 | 0.765493  | 0.764019 | 4026.0  |
| micro avg    | 0.769668 | 0.769668  | 0.769668 | 4026.0  |
| weighted avg | 0.769627 | 0.769734  | 0.769668 | 4026.0  |

The result of Model Number:Dataset Number:Featuregroup Number:Rescale of 59 : 1 : 2 : 0

|              | f1-score | precision | recall   | support |
|--------------|----------|-----------|----------|---------|
| AFIB         | 0.639919 | 0.666636  | 0.615377 | 875.0   |
| GSVT         | 0.691336 | 0.687836  | 0.694955 | 691.0   |
| SB           | 0.758070 | 0.753804  | 0.762406 | 1553.0  |
| SR           | 0.709819 | 0.694057  | 0.726325 | 907.0   |
| macro avg    | 0.699786 | 0.700583  | 0.699766 | 4026.0  |
| micro avg    | 0.710745 | 0.710745  | 0.710745 | 4026.0  |
| weighted avg | 0.710067 | 0.710077  | 0.710745 | 4026.0  |

The result of Model Number:Dataset Number:Featuregroup Number:Rescale of 59 : 1 : 2 : 1

|              | f1-score | precision | recall   | support |
|--------------|----------|-----------|----------|---------|
| AFIB         | 0.668002 | 0.661283  | 0.674877 | 875.0   |
| GSVT         | 0.673980 | 0.679980  | 0.668133 | 691.0   |
| SB           | 0.713041 | 0.710852  | 0.715244 | 1553.0  |
| SR           | 0.699233 | 0.705353  | 0.693220 | 907.0   |
| macro avg    | 0.688564 | 0.689367  | 0.687869 | 4026.0  |
| micro avg    | 0.693423 | 0.693423  | 0.693423 | 4026.0  |
| weighted avg | 0.693437 | 0.693541  | 0.693423 | 4026.0  |

The result of Model Number:Dataset Number:Featuregroup Number:Rescale of 59 : 1 : 3 : 0

|              | f1-score | precision | recall   | support |
|--------------|----------|-----------|----------|---------|
| AFIB         | 0.884035 | 0.875841  | 0.892433 | 875.0   |
| GSVT         | 0.899911 | 0.904798  | 0.895091 | 691.0   |
| SB           | 0.953507 | 0.951309  | 0.955716 | 1553.0  |
| SR           | 0.931291 | 0.939885  | 0.922882 | 907.0   |
| macro avg    | 0.917186 | 0.917958  | 0.916530 | 4026.0  |
| micro avg    | 0.924160 | 0.924160  | 0.924160 | 4026.0  |
| weighted avg | 0.924204 | 0.924350  | 0.924160 | 4026.0  |

The result of Model Number:Dataset Number:Featuregroup Number:Rescale of 59 : 1 : 3 : 1

|      | f1-score | precision | recall   | support |
|------|----------|-----------|----------|---------|
| AFIB | 0.755388 | 0.760674  | 0.750201 | 204.0   |

GSVT 0.772963 0.769152 0.776823 300.0  
SB 0.788326 0.787014 0.789651 892.0  
SR 0.780480 0.782333 0.778645 681.0  
macro avg 0.774289 0.774793 0.773830 2077.0  
micro avg 0.780315 0.780315 0.780315 2077.0  
weighted avg 0.780299 0.780312 0.780315 2077.0  
The result of Model Number:Dataset Number:Featuregroup Number:Rescale of 59 : 1 : 4 :  
0

f1-score precision recall support  
AFIB 0.697686 0.727903 0.670076 204.0  
GSVT 0.652215 0.658302 0.646567 300.0  
SB 0.676068 0.642830 0.712980 892.0  
SR 0.602560 0.640586 0.568990 681.0  
macro avg 0.657132 0.667405 0.649653 2077.0  
micro avg 0.651962 0.651962 0.651962 2077.0  
weighted avg 0.650645 0.652685 0.651962 2077.0  
The result of Model Number:Dataset Number:Featuregroup Number:Rescale of 59 : 1 : 4 :  
1

f1-score precision recall support  
AFIB 0.875088 0.894400 0.856657 204.0  
GSVT 0.894213 0.879384 0.909657 300.0  
SB 0.911395 0.904267 0.918647 892.0  
SR 0.889277 0.899980 0.878827 681.0  
macro avg 0.892493 0.894508 0.890947 2077.0  
micro avg 0.898204 0.898204 0.898204 2077.0  
weighted avg 0.898095 0.898298 0.898204 2077.0  
The result of Model Number:Dataset Number:Featuregroup Number:Rescale of 59 : 1 : 5 :  
0

f1-score precision recall support  
AFIB 0.799027 0.807906 0.790752 204.0  
GSVT 0.823778 0.819088 0.828761 300.0  
SB 0.840166 0.839040 0.841296 892.0  
SR 0.833019 0.834134 0.831916 681.0  
macro avg 0.823997 0.825042 0.823181 2077.0  
micro avg 0.831446 0.831446 0.831446 2077.0  
weighted avg 0.831415 0.831492 0.831446 2077.0  
The result of Model Number:Dataset Number:Featuregroup Number:Rescale of 59 : 1 : 5 :  
1

f1-score precision recall support  
AFIB 0.750318 0.743682 0.757104 875.0  
GSVT 0.682169 0.660629 0.758927 691.0  
SB 0.615012 0.590497 0.653350 1553.0  
SR 0.633859 0.640418 0.627475 907.0  
macro avg 0.670340 0.658806 0.699214 4026.0

micro avg 0.688191 0.688191 0.688191 4026.0  
weighted avg 0.660192 0.647073 0.688191 4026.0  
The result of Model Number:Dataset Number:Featuregroup Number:Rescale of 59 : 1 : 6 :  
0

|              | f1-score | precision | recall   | support |
|--------------|----------|-----------|----------|---------|
| AFIB         | 0.748001 | 0.746469  | 0.750082 | 875.0   |
| GSVT         | 0.758205 | 0.750246  | 0.766471 | 691.0   |
| SB           | 0.799651 | 0.788854  | 0.810904 | 1553.0  |
| SR           | 0.760740 | 0.789751  | 0.733958 | 907.0   |
| macro avg    | 0.766649 | 0.768830  | 0.765354 | 4026.0  |
| micro avg    | 0.772724 | 0.772724  | 0.772724 | 4026.0  |
| weighted avg | 0.772546 | 0.773218  | 0.772724 | 4026.0  |

The result of Model Number:Dataset Number:Featuregroup Number:Rescale of 59 : 1 : 6 :  
1

|              | f1-score | precision | recall   | support |
|--------------|----------|-----------|----------|---------|
| AFIB         | 0.880116 | 0.879324  | 0.880995 | 875.0   |
| GSVT         | 0.895364 | 0.887165  | 0.903785 | 691.0   |
| SB           | 0.939577 | 0.931317  | 0.947987 | 1553.0  |
| SR           | 0.895343 | 0.917477  | 0.874330 | 907.0   |
| macro avg    | 0.902600 | 0.903821  | 0.901774 | 4026.0  |
| micro avg    | 0.909246 | 0.909246  | 0.909246 | 4026.0  |
| weighted avg | 0.909100 | 0.909321  | 0.909246 | 4026.0  |

The result of Model Number:Dataset Number:Featuregroup Number:Rescale of 59 : 1 : 7 :  
0

|              | f1-score | precision | recall   | support |
|--------------|----------|-----------|----------|---------|
| AFIB         | 0.722622 | 0.760670  | 0.688393 | 204.0   |
| GSVT         | 0.758909 | 0.752261  | 0.765708 | 300.0   |
| SB           | 0.778601 | 0.773794  | 0.783482 | 892.0   |
| SR           | 0.767978 | 0.766421  | 0.769561 | 681.0   |
| macro avg    | 0.757027 | 0.763286  | 0.751786 | 2077.0  |
| micro avg    | 0.767010 | 0.767010  | 0.767010 | 2077.0  |
| weighted avg | 0.766775 | 0.766977  | 0.767010 | 2077.0  |

The result of Model Number:Dataset Number:Featuregroup Number:Rescale of 59 : 1 : 7 :  
1

|              | f1-score | precision | recall   | support |
|--------------|----------|-----------|----------|---------|
| AFIB         | 0.781555 | 0.773112  | 0.889670 | 204.0   |
| GSVT         | 0.935080 | 0.927795  | 0.942562 | 300.0   |
| SB           | 0.763115 | 0.761519  | 0.764719 | 892.0   |
| SR           | 0.946279 | 0.946014  | 0.946557 | 681.0   |
| macro avg    | 0.856507 | 0.852110  | 0.885877 | 2077.0  |
| micro avg    | 0.862299 | 0.862299  | 0.862299 | 2077.0  |
| weighted avg | 0.849820 | 0.847166  | 0.862299 | 2077.0  |

The result of Model Number:Dataset Number:Featuregroup Number:Rescale of 59 : 1 : 8 :  
0

f1-score precision recall support  
AFIB 0.752250 0.758213 0.746400 875.0  
GSVT 0.761787 0.758429 0.765202 691.0  
SB 0.810071 0.806869 0.813305 1553.0  
SR 0.790165 0.792398 0.787983 907.0  
macro avg 0.778568 0.778977 0.778222 4026.0  
micro avg 0.784803 0.784803 0.784803 4026.0  
weighted avg 0.784733 0.784720 0.784803 4026.0  
The result of Model Number:Dataset Number:Featuregroup Number:Rescale of 59 : 1 : 8 :  
1

f1-score precision recall support  
AFIB 0.885495 0.895623 0.875936 204.0  
GSVT 0.906222 0.900859 0.911663 300.0  
SB 0.869956 0.837821 0.924199 892.0  
SR 0.729756 0.733288 0.726277 681.0  
macro avg 0.847857 0.841898 0.859519 2077.0  
micro avg 0.852754 0.852754 0.852754 2077.0  
weighted avg 0.830752 0.818330 0.852754 2077.0  
The result of Model Number:Dataset Number:Featuregroup Number:Rescale of 59 : 1 : 9 :  
0

f1-score precision recall support  
AFIB 0.852590 0.852171 0.853076 875.0  
GSVT 0.871098 0.866812 0.875481 691.0  
SB 0.911184 0.905227 0.917226 1553.0  
SR 0.885245 0.899665 0.871305 907.0  
macro avg 0.880029 0.880969 0.879272 4026.0  
micro avg 0.885773 0.885773 0.885773 4026.0  
weighted avg 0.885726 0.885850 0.885773 4026.0  
The result of Model Number:Dataset Number:Featuregroup Number:Rescale of 59 : 1 : 9 :  
1

f1-score precision recall support  
AFIB 0.852582 0.857685 0.847584 204.0  
GSVT 0.875294 0.872693 0.877918 300.0  
SB 0.888698 0.887609 0.889793 892.0  
SR 0.882219 0.883260 0.881188 681.0  
macro avg 0.874699 0.875312 0.874121 2077.0  
micro avg 0.881111 0.881111 0.881111 2077.0  
weighted avg 0.881091 0.881090 0.881111 2077.0  
The result of Model Number:Dataset Number:Featuregroup Number:Rescale of 59 : 1 :  
10 : 0

f1-score precision recall support  
AFIB 0.723424 0.730496 0.716657 875.0  
GSVT 0.717899 0.712452 0.723665 691.0  
SB 0.759618 0.751803 0.767665 1553.0



SR 0.735507 0.747335 0.724254 907.0  
macro avg 0.734112 0.735522 0.733061 4026.0  
micro avg 0.739248 0.739248 0.739248 4026.0  
weighted avg 0.739159 0.739412 0.739248 4026.0  
The result of Model Number:Dataset Number:Featuregroup Number:Rescale of 59 : 1 : 10 : 1

f1-score precision recall support  
AFIB 0.910894 0.932752 0.890451 204.0  
GSVT 0.943283 0.937816 0.948928 300.0  
SB 0.963429 0.959894 0.966992 892.0  
SR 0.955056 0.955765 0.954360 681.0  
macro avg 0.943165 0.946557 0.940183 2077.0  
micro avg 0.952723 0.952723 0.952723 2077.0  
weighted avg 0.952614 0.952686 0.952723 2077.0

The result of Model Number:Dataset Number:Featuregroup Number:Rescale of 60 : 0 : 0 : 0

f1-score precision recall support  
AFIB 0.790408 0.796673 0.784260 875.0  
GSVT 0.800428 0.796900 0.804016 691.0  
SB 0.851161 0.847796 0.854559 1553.0  
SR 0.830245 0.832591 0.827953 907.0  
macro avg 0.818061 0.818490 0.817697 4026.0  
micro avg 0.824612 0.824612 0.824612 4026.0  
weighted avg 0.824538 0.824524 0.824612 4026.0

The result of Model Number:Dataset Number:Featuregroup Number:Rescale of 60 : 0 : 0 : 1

f1-score precision recall support  
AFIB 0.842639 0.832060 0.853736 875.0  
GSVT 0.781802 0.805472 0.762097 691.0  
SB 0.841734 0.779632 0.916812 1553.0  
SR 0.654475 0.801028 0.558085 907.0  
macro avg 0.780163 0.804548 0.772682 4026.0  
micro avg 0.795733 0.795733 0.795733 4026.0  
weighted avg 0.789458 0.800282 0.795733 4026.0

The result of Model Number:Dataset Number:Featuregroup Number:Rescale of 60 : 0 : 1 : 0

f1-score precision recall support  
AFIB 0.659897 0.656592 0.663452 875.0  
GSVT 0.674807 0.675719 0.674032 691.0  
SB 0.718577 0.716210 0.720978 1553.0  
SR 0.697474 0.704713 0.690464 907.0  
macro avg 0.687688 0.688308 0.687232 4026.0  
micro avg 0.693544 0.693544 0.693544 4026.0  
weighted avg 0.693557 0.693713 0.693544 4026.0

The result of Model Number:Dataset Number:Featuregroup Number:Rescale of 60 : 0 : 1 : 1

|              | f1-score | precision | recall   | support |
|--------------|----------|-----------|----------|---------|
| AFIB         | 0.780150 | 0.797928  | 0.763271 | 875.0   |
| GSVT         | 0.830179 | 0.831820  | 0.828822 | 691.0   |
| SB           | 0.908271 | 0.903300  | 0.913300 | 1553.0  |
| SR           | 0.858452 | 0.848039  | 0.869244 | 907.0   |
| macro avg    | 0.844263 | 0.845272  | 0.843659 | 4026.0  |
| micro avg    | 0.856269 | 0.856269  | 0.856269 | 4026.0  |
| weighted avg | 0.855799 | 0.855681  | 0.856269 | 4026.0  |

The result of Model Number:Dataset Number:Featuregroup Number:Rescale of 60 : 0 : 2 : 0

|              | f1-score | precision | recall   | support |
|--------------|----------|-----------|----------|---------|
| AFIB         | 0.713295 | 0.708475  | 0.718279 | 875.0   |
| GSVT         | 0.730697 | 0.730988  | 0.730501 | 691.0   |
| SB           | 0.776217 | 0.774236  | 0.778216 | 1553.0  |
| SR           | 0.755082 | 0.763518  | 0.746840 | 907.0   |
| macro avg    | 0.743823 | 0.744304  | 0.743459 | 4026.0  |
| micro avg    | 0.749931 | 0.749931  | 0.749931 | 4026.0  |
| weighted avg | 0.749968 | 0.750106  | 0.749931 | 4026.0  |

The result of Model Number:Dataset Number:Featuregroup Number:Rescale of 60 : 0 : 2 : 1

|              | f1-score | precision | recall   | support |
|--------------|----------|-----------|----------|---------|
| AFIB         | 0.716142 | 0.737860  | 0.695696 | 875.0   |
| GSVT         | 0.764492 | 0.759190  | 0.769909 | 691.0   |
| SB           | 0.836447 | 0.833247  | 0.839677 | 1553.0  |
| SR           | 0.791077 | 0.779204  | 0.803364 | 907.0   |
| macro avg    | 0.777039 | 0.777375  | 0.777161 | 4026.0  |
| micro avg    | 0.788229 | 0.788229  | 0.788229 | 4026.0  |
| weighted avg | 0.787729 | 0.787630  | 0.788229 | 4026.0  |

The result of Model Number:Dataset Number:Featuregroup Number:Rescale of 60 : 0 : 3 : 0

|              | f1-score | precision | recall   | support |
|--------------|----------|-----------|----------|---------|
| AFIB         | 0.746569 | 0.839451  | 0.672852 | 204.0   |
| GSVT         | 0.885749 | 0.866835  | 0.905546 | 300.0   |
| SB           | 0.945554 | 0.940734  | 0.950428 | 892.0   |
| SR           | 0.924341 | 0.912636  | 0.936410 | 681.0   |
| macro avg    | 0.875553 | 0.889914  | 0.866309 | 2077.0  |
| micro avg    | 0.912086 | 0.912086  | 0.912086 | 2077.0  |
| weighted avg | 0.910417 | 0.910899  | 0.912086 | 2077.0  |

The result of Model Number:Dataset Number:Featuregroup Number:Rescale of 60 : 0 : 3 : 1

|      | f1-score | precision | recall   | support |
|------|----------|-----------|----------|---------|
| AFIB | 0.776893 | 0.786964  | 0.767283 | 204.0   |

GSVT 0.806954 0.806432 0.807501 300.0  
SB 0.823957 0.822217 0.825710 892.0  
SR 0.815670 0.815207 0.816152 681.0  
macro avg 0.805869 0.807705 0.804161 2077.0  
micro avg 0.814207 0.814207 0.814207 2077.0  
weighted avg 0.814162 0.814176 0.814207 2077.0  
The result of Model Number:Dataset Number:Featuregroup Number:Rescale of 60 : 0 : 4 :  
0

f1-score precision recall support

AFIB 0.735621 0.733582 0.737726 875.0  
GSVT 0.741442 0.744978 0.738013 691.0  
SB 0.776160 0.773679 0.778658 1553.0  
SR 0.763751 0.767440 0.760133 907.0  
macro avg 0.754243 0.754920 0.753633 4026.0  
micro avg 0.758613 0.758613 0.758613 4026.0  
weighted avg 0.758595 0.758633 0.758613 4026.0

The result of Model Number:Dataset Number:Featuregroup Number:Rescale of 60 : 0 : 4 :  
1

f1-score precision recall support

AFIB 0.684734 0.686555 0.682964 875.0  
GSVT 0.697901 0.692985 0.702929 691.0  
SB 0.737764 0.730241 0.745457 1553.0  
SR 0.704039 0.719374 0.689369 907.0  
macro avg 0.706109 0.707289 0.705180 4026.0  
micro avg 0.711940 0.711940 0.711940 4026.0  
weighted avg 0.711799 0.711904 0.711940 4026.0

The result of Model Number:Dataset Number:Featuregroup Number:Rescale of 60 : 0 : 5 :  
0

f1-score precision recall support

AFIB 0.838641 0.904005 0.782481 204.0  
GSVT 0.864215 0.878844 0.850102 300.0  
SB 0.915905 0.907476 0.924521 892.0  
SR 0.879451 0.866698 0.892626 681.0  
macro avg 0.874553 0.889256 0.862432 2077.0  
micro avg 0.889363 0.889363 0.889363 2077.0  
weighted avg 0.888898 0.889629 0.889363 2077.0

The result of Model Number:Dataset Number:Featuregroup Number:Rescale of 60 : 0 : 5 :  
1

f1-score precision recall support

AFIB 0.865850 0.849665 0.882757 875.0  
GSVT 0.896180 0.910328 0.882577 691.0  
SB 0.953049 0.951346 0.954767 1553.0  
SR 0.928824 0.938665 0.919194 907.0  
macro avg 0.910976 0.912501 0.909824 4026.0

micro avg 0.918712 0.918712 0.918712 4026.0  
weighted avg 0.918880 0.919350 0.918712 4026.0  
The result of Model Number:Dataset Number:Featuregroup Number:Rescale of 60 : 0 : 6 :  
0

|              | f1-score | precision | recall   | support |
|--------------|----------|-----------|----------|---------|
| AFIB         | 0.702436 | 0.718320  | 0.687260 | 875.0   |
| GSVT         | 0.744742 | 0.747911  | 0.741643 | 691.0   |
| SB           | 0.808635 | 0.804824  | 0.812487 | 1553.0  |
| SR           | 0.766171 | 0.754418  | 0.778327 | 907.0   |
| macro avg    | 0.755496 | 0.756368  | 0.754929 | 4026.0  |
| micro avg    | 0.765415 | 0.765415  | 0.765415 | 4026.0  |
| weighted avg | 0.765021 | 0.764900  | 0.765415 | 4026.0  |

The result of Model Number:Dataset Number:Featuregroup Number:Rescale of 60 : 0 : 6 :  
1

|              | f1-score | precision | recall   | support |
|--------------|----------|-----------|----------|---------|
| AFIB         | 0.684169 | 0.708095  | 0.662122 | 204.0   |
| GSVT         | 0.713062 | 0.708715  | 0.717560 | 300.0   |
| SB           | 0.727704 | 0.724715  | 0.730722 | 892.0   |
| SR           | 0.720977 | 0.719926  | 0.722036 | 681.0   |
| macro avg    | 0.711478 | 0.715363  | 0.708110 | 2077.0  |
| micro avg    | 0.719235 | 0.719235  | 0.719235 | 2077.0  |
| weighted avg | 0.719108 | 0.719201  | 0.719235 | 2077.0  |

The result of Model Number:Dataset Number:Featuregroup Number:Rescale of 60 : 0 : 7 :  
0

|              | f1-score | precision | recall   | support |
|--------------|----------|-----------|----------|---------|
| AFIB         | 0.838958 | 0.838539  | 0.839414 | 875.0   |
| GSVT         | 0.849393 | 0.855076  | 0.843853 | 691.0   |
| SB           | 0.900473 | 0.898404  | 0.902557 | 1553.0  |
| SR           | 0.874392 | 0.874185  | 0.874751 | 907.0   |
| macro avg    | 0.865804 | 0.866551  | 0.865144 | 4026.0  |
| micro avg    | 0.872494 | 0.872494  | 0.872494 | 4026.0  |
| weighted avg | 0.872461 | 0.872501  | 0.872494 | 4026.0  |

The result of Model Number:Dataset Number:Featuregroup Number:Rescale of 60 : 0 : 7 :  
1

|              | f1-score | precision | recall   | support |
|--------------|----------|-----------|----------|---------|
| AFIB         | 0.863587 | 0.863157  | 0.864057 | 875.0   |
| GSVT         | 0.874329 | 0.880179  | 0.868627 | 691.0   |
| SB           | 0.926909 | 0.924779  | 0.929054 | 1553.0  |
| SR           | 0.900062 | 0.899849  | 0.900431 | 907.0   |
| macro avg    | 0.891222 | 0.891991  | 0.890542 | 4026.0  |
| micro avg    | 0.898108 | 0.898108  | 0.898108 | 4026.0  |
| weighted avg | 0.898074 | 0.898115  | 0.898108 | 4026.0  |

The result of Model Number:Dataset Number:Featuregroup Number:Rescale of 60 : 0 : 8 :  
0

f1-score precision recall support  
AFIB 0.828310 0.816549 0.840507 875.0  
GSVT 0.858349 0.869299 0.847801 691.0  
SB 0.912188 0.910850 0.913539 1553.0  
SR 0.889463 0.896135 0.882892 907.0  
macro avg 0.872078 0.873208 0.871185 4026.0  
micro avg 0.879479 0.879479 0.879479 4026.0  
weighted avg 0.879598 0.879908 0.879479 4026.0  
The result of Model Number:Dataset Number:Featuregroup Number:Rescale of 60 : 0 : 8 :  
1

f1-score precision recall support  
AFIB 0.755965 0.762768 0.749521 875.0  
GSVT 0.771365 0.755724 0.787848 691.0  
SB 0.818037 0.808937 0.827443 1553.0  
SR 0.785576 0.808928 0.763720 907.0  
macro avg 0.782736 0.784089 0.782133 4026.0  
micro avg 0.789356 0.789356 0.789356 4026.0  
weighted avg 0.789223 0.789767 0.789356 4026.0  
The result of Model Number:Dataset Number:Featuregroup Number:Rescale of 60 : 0 : 9 :  
0

f1-score precision recall support  
AFIB 0.682698 0.696043 0.669975 204.0  
GSVT 0.701457 0.696403 0.706609 300.0  
SB 0.714011 0.711233 0.716813 892.0  
SR 0.706207 0.708205 0.704235 681.0  
macro avg 0.701093 0.702971 0.699408 2077.0  
micro avg 0.706615 0.706615 0.706615 2077.0  
weighted avg 0.706564 0.706606 0.706615 2077.0  
The result of Model Number:Dataset Number:Featuregroup Number:Rescale of 60 : 0 : 9 :  
1

f1-score precision recall support  
AFIB 0.661398 0.652892 0.670176 875.0  
GSVT 0.674862 0.680449 0.669393 691.0  
SB 0.721563 0.718351 0.724812 1553.0  
SR 0.701029 0.711397 0.690975 907.0  
macro avg 0.689713 0.690772 0.688839 4026.0  
micro avg 0.695803 0.695803 0.695803 4026.0  
weighted avg 0.695845 0.696053 0.695803 4026.0  
The result of Model Number:Dataset Number:Featuregroup Number:Rescale of 60 : 0 :  
10 : 0

f1-score precision recall support  
AFIB 0.746256 0.826864 0.680106 204.0  
GSVT 0.865071 0.851001 0.879749 300.0  
SB 0.922545 0.918344 0.926784 892.0

SR 0.900254 0.888798 0.912022 681.0  
macro avg 0.858531 0.871252 0.849665 2077.0  
micro avg 0.890922 0.890922 0.890922 2077.0  
weighted avg 0.889620 0.889945 0.890922 2077.0  
The result of Model Number:Dataset Number:Featuregroup Number:Rescale of 60 : 0 :  
10 : 1

f1-score precision recall support  
AFIB 0.661171 0.651289 0.671382 875.0  
GSVT 0.673848 0.679611 0.668192 691.0  
SB 0.719991 0.717512 0.722492 1553.0  
SR 0.698917 0.709341 0.688818 907.0  
macro avg 0.688482 0.689438 0.687721 4026.0  
micro avg 0.694478 0.694478 0.694478 4026.0  
weighted avg 0.694540 0.694773 0.694478 4026.0

The result of Model Number:Dataset Number:Featuregroup Number:Rescale of 60 : 1 : 0 :  
0

f1-score precision recall support  
AFIB 0.596977 0.651044 0.552197 204.0  
GSVT 0.692901 0.684984 0.701218 300.0  
SB 0.734781 0.732900 0.736675 892.0  
SR 0.716791 0.707084 0.726788 681.0  
macro avg 0.685363 0.694003 0.679219 2077.0  
micro avg 0.710193 0.710193 0.710193 2077.0  
weighted avg 0.709298 0.709475 0.710193 2077.0

The result of Model Number:Dataset Number:Featuregroup Number:Rescale of 60 : 1 : 0 :  
1

f1-score precision recall support  
AFIB 0.767427 0.775778 0.759478 204.0  
GSVT 0.793398 0.790089 0.796863 300.0  
SB 0.809656 0.808932 0.810382 892.0  
SR 0.802005 0.802011 0.802005 681.0  
macro avg 0.793121 0.794203 0.792182 2077.0  
micro avg 0.800683 0.800683 0.800683 2077.0  
weighted avg 0.800651 0.800685 0.800683 2077.0

The result of Model Number:Dataset Number:Featuregroup Number:Rescale of 60 : 1 : 1 :  
0

f1-score precision recall support  
AFIB 0.873850 0.912687 0.838304 204.0  
GSVT 0.910265 0.903119 0.917545 300.0  
SB 0.924169 0.917040 0.931419 892.0  
SR 0.913945 0.915454 0.912473 681.0  
macro avg 0.905557 0.912075 0.899935 2077.0  
micro avg 0.914057 0.914057 0.914057 2077.0  
weighted avg 0.913866 0.914082 0.914057 2077.0

The result of Model Number:Dataset Number:Featuregroup Number:Rescale of 60 : 1 : 1 : 1

|              | f1-score | precision | recall   | support |
|--------------|----------|-----------|----------|---------|
| AFIB         | 0.814993 | 0.821572  | 0.808587 | 204.0   |
| GSVT         | 0.833693 | 0.829605  | 0.837850 | 300.0   |
| SB           | 0.849964 | 0.849021  | 0.850916 | 892.0   |
| SR           | 0.843617 | 0.844739  | 0.842504 | 681.0   |
| macro avg    | 0.835567 | 0.836234  | 0.834965 | 2077.0  |
| micro avg    | 0.842114 | 0.842114  | 0.842114 | 2077.0  |
| weighted avg | 0.842098 | 0.842117  | 0.842114 | 2077.0  |

The result of Model Number:Dataset Number:Featuregroup Number:Rescale of 60 : 1 : 2 : 0

|              | f1-score | precision | recall   | support |
|--------------|----------|-----------|----------|---------|
| AFIB         | 0.653539 | 0.649630  | 0.657585 | 875.0   |
| GSVT         | 0.658891 | 0.662449  | 0.655467 | 691.0   |
| SB           | 0.698326 | 0.696285  | 0.700390 | 1553.0  |
| SR           | 0.682546 | 0.687449  | 0.677726 | 907.0   |
| macro avg    | 0.673326 | 0.673953  | 0.672792 | 4026.0  |
| micro avg    | 0.678271 | 0.678271  | 0.678271 | 4026.0  |
| weighted avg | 0.678269 | 0.678347  | 0.678271 | 4026.0  |

The result of Model Number:Dataset Number:Featuregroup Number:Rescale of 60 : 1 : 2 : 1

|              | f1-score | precision | recall   | support |
|--------------|----------|-----------|----------|---------|
| AFIB         | 0.701577 | 0.713241  | 0.690449 | 204.0   |
| GSVT         | 0.715030 | 0.709950  | 0.720236 | 300.0   |
| SB           | 0.731615 | 0.727503  | 0.735790 | 892.0   |
| SR           | 0.722294 | 0.726713  | 0.717951 | 681.0   |
| macro avg    | 0.717629 | 0.719352  | 0.716107 | 2077.0  |
| micro avg    | 0.723241 | 0.723241  | 0.723241 | 2077.0  |
| weighted avg | 0.723213 | 0.723308  | 0.723241 | 2077.0  |

The result of Model Number:Dataset Number:Featuregroup Number:Rescale of 60 : 1 : 3 : 0

|              | f1-score | precision | recall   | support |
|--------------|----------|-----------|----------|---------|
| AFIB         | 0.750470 | 0.757807  | 0.743450 | 875.0   |
| GSVT         | 0.744738 | 0.739087  | 0.750720 | 691.0   |
| SB           | 0.788017 | 0.779910  | 0.796365 | 1553.0  |
| SR           | 0.763005 | 0.775275  | 0.751332 | 907.0   |
| macro avg    | 0.761558 | 0.763020  | 0.760467 | 4026.0  |
| micro avg    | 0.766885 | 0.766885  | 0.766885 | 4026.0  |
| weighted avg | 0.766794 | 0.767055  | 0.766885 | 4026.0  |

The result of Model Number:Dataset Number:Featuregroup Number:Rescale of 60 : 1 : 3 : 1

|      | f1-score | precision | recall   | support |
|------|----------|-----------|----------|---------|
| AFIB | 0.670069 | 0.734563  | 0.616214 | 204.0   |

GSVT 0.779292 0.771285 0.787613 300.0  
SB 0.826109 0.822896 0.829350 892.0  
SR 0.806969 0.795810 0.818459 681.0  
macro avg 0.770610 0.781139 0.762909 2077.0  
micro avg 0.798817 0.798817 0.798817 2077.0  
weighted avg 0.797745 0.797885 0.798817 2077.0  
The result of Model Number:Dataset Number:Featuregroup Number:Rescale of 60 : 1 : 4 :  
0

f1-score precision recall support  
AFIB 0.730609 0.737352 0.724029 875.0  
GSVT 0.747669 0.745651 0.749725 691.0  
SB 0.796278 0.788794 0.803914 1553.0  
SR 0.774278 0.782047 0.766677 907.0  
macro avg 0.762209 0.763461 0.761086 4026.0  
micro avg 0.768862 0.768862 0.768862 4026.0  
weighted avg 0.768707 0.768689 0.768862 4026.0  
The result of Model Number:Dataset Number:Featuregroup Number:Rescale of 60 : 1 : 4 :  
1

f1-score precision recall support  
AFIB 0.760768 0.777691 0.744729 204.0  
GSVT 0.793181 0.788252 0.798202 300.0  
SB 0.810399 0.808692 0.812123 892.0  
SR 0.801767 0.801200 0.802360 681.0  
macro avg 0.791529 0.793959 0.789354 2077.0  
micro avg 0.800292 0.800292 0.800292 2077.0  
weighted avg 0.800207 0.800238 0.800292 2077.0  
The result of Model Number:Dataset Number:Featuregroup Number:Rescale of 60 : 1 : 5 :  
0

f1-score precision recall support  
AFIB 0.787563 0.794569 0.780720 875.0  
GSVT 0.804093 0.795269 0.813167 691.0  
SB 0.864797 0.858064 0.871644 1553.0  
SR 0.836059 0.847909 0.824538 907.0  
macro avg 0.823128 0.823953 0.822517 4026.0  
micro avg 0.831234 0.831234 0.831234 4026.0  
weighted avg 0.831118 0.831199 0.831234 4026.0  
The result of Model Number:Dataset Number:Featuregroup Number:Rescale of 60 : 1 : 5 :  
1

f1-score precision recall support  
AFIB 0.798632 0.805776 0.791713 875.0  
GSVT 0.813885 0.798409 0.830129 691.0  
SB 0.863871 0.856387 0.871490 1553.0  
SR 0.828389 0.847436 0.810217 907.0  
macro avg 0.826194 0.827002 0.825887 4026.0



micro avg 0.833248 0.833248 0.833248 4026.0  
weighted avg 0.833119 0.833420 0.833248 4026.0  
The result of Model Number:Dataset Number:Featuregroup Number:Rescale of 60 : 1 : 6 :  
0

|              | f1-score | precision | recall   | support |
|--------------|----------|-----------|----------|---------|
| AFIB         | 0.699328 | 0.728525  | 0.672507 | 875.0   |
| GSVT         | 0.755518 | 0.751693  | 0.759474 | 691.0   |
| SB           | 0.828448 | 0.823786  | 0.833186 | 1553.0  |
| SR           | 0.775717 | 0.758492  | 0.793756 | 907.0   |
| macro avg    | 0.764753 | 0.765624  | 0.764731 | 4026.0  |
| micro avg    | 0.776730 | 0.776730  | 0.776730 | 4026.0  |
| weighted avg | 0.775989 | 0.775999  | 0.776730 | 4026.0  |

The result of Model Number:Dataset Number:Featuregroup Number:Rescale of 60 : 1 : 6 :  
1

|              | f1-score | precision | recall   | support |
|--------------|----------|-----------|----------|---------|
| AFIB         | 0.886152 | 0.884337  | 0.888618 | 875.0   |
| GSVT         | 0.898240 | 0.888811  | 0.908033 | 691.0   |
| SB           | 0.947342 | 0.934550  | 0.960674 | 1553.0  |
| SR           | 0.901245 | 0.935614  | 0.869516 | 907.0   |
| macro avg    | 0.908245 | 0.910828  | 0.906710 | 4026.0  |
| micro avg    | 0.915442 | 0.915442  | 0.915442 | 4026.0  |
| weighted avg | 0.915231 | 0.916026  | 0.915442 | 4026.0  |

The result of Model Number:Dataset Number:Featuregroup Number:Rescale of 60 : 1 : 7 :  
0

|              | f1-score | precision | recall   | support |
|--------------|----------|-----------|----------|---------|
| AFIB         | 0.830766 | 0.833571  | 0.828009 | 875.0   |
| GSVT         | 0.828572 | 0.822736  | 0.834566 | 691.0   |
| SB           | 0.871810 | 0.863718  | 0.880060 | 1553.0  |
| SR           | 0.838666 | 0.854828  | 0.823144 | 907.0   |
| macro avg    | 0.842453 | 0.843713  | 0.841445 | 4026.0  |
| micro avg    | 0.848117 | 0.848117  | 0.848117 | 4026.0  |
| weighted avg | 0.848001 | 0.848129  | 0.848117 | 4026.0  |

The result of Model Number:Dataset Number:Featuregroup Number:Rescale of 60 : 1 : 7 :  
1

|              | f1-score | precision | recall   | support |
|--------------|----------|-----------|----------|---------|
| AFIB         | 0.775266 | 0.763679  | 0.787239 | 875.0   |
| GSVT         | 0.790130 | 0.796888  | 0.783499 | 691.0   |
| SB           | 0.844236 | 0.841329  | 0.847169 | 1553.0  |
| SR           | 0.819526 | 0.831749  | 0.807685 | 907.0   |
| macro avg    | 0.807290 | 0.808411  | 0.806398 | 4026.0  |
| micro avg    | 0.814321 | 0.814321  | 0.814321 | 4026.0  |
| weighted avg | 0.814393 | 0.814667  | 0.814321 | 4026.0  |

The result of Model Number:Dataset Number:Featuregroup Number:Rescale of 60 : 1 : 8 :  
0

|              | f1-score | precision | recall   | support |
|--------------|----------|-----------|----------|---------|
| AFIB         | 0.809736 | 0.821199  | 0.799254 | 204.0   |
| GSVT         | 0.826548 | 0.811330  | 0.842500 | 300.0   |
| SB           | 0.844165 | 0.834831  | 0.853723 | 892.0   |
| SR           | 0.826424 | 0.843256  | 0.810300 | 681.0   |
| macro avg    | 0.826718 | 0.827654  | 0.826444 | 2077.0  |
| micro avg    | 0.832515 | 0.832515  | 0.832515 | 2077.0  |
| weighted avg | 0.832422 | 0.832860  | 0.832515 | 2077.0  |

The result of Model Number:Dataset Number:Featuregroup Number:Rescale of 60 : 1 : 8 : 1

|              | f1-score | precision | recall   | support |
|--------------|----------|-----------|----------|---------|
| AFIB         | 0.860934 | 0.902153  | 0.823520 | 204.0   |
| GSVT         | 0.906795 | 0.897088  | 0.916749 | 300.0   |
| SB           | 0.926057 | 0.920941  | 0.931241 | 892.0   |
| SR           | 0.915595 | 0.914801  | 0.916406 | 681.0   |
| macro avg    | 0.902345 | 0.908746  | 0.896979 | 2077.0  |
| micro avg    | 0.913704 | 0.913704  | 0.913704 | 2077.0  |
| weighted avg | 0.913448 | 0.913637  | 0.913704 | 2077.0  |

The result of Model Number:Dataset Number:Featuregroup Number:Rescale of 60 : 1 : 9 : 0

|              | f1-score | precision | recall   | support |
|--------------|----------|-----------|----------|---------|
| AFIB         | 0.642630 | 0.628825  | 0.657089 | 875.0   |
| GSVT         | 0.665511 | 0.675162  | 0.656175 | 691.0   |
| SB           | 0.708462 | 0.708327  | 0.708600 | 1553.0  |
| SR           | 0.690706 | 0.698734  | 0.682864 | 907.0   |
| macro avg    | 0.676827 | 0.677762  | 0.676182 | 4026.0  |
| micro avg    | 0.682609 | 0.682609  | 0.682609 | 4026.0  |
| weighted avg | 0.682782 | 0.683195  | 0.682609 | 4026.0  |

The result of Model Number:Dataset Number:Featuregroup Number:Rescale of 60 : 1 : 9 : 1

|              | f1-score | precision | recall   | support |
|--------------|----------|-----------|----------|---------|
| AFIB         | 0.714932 | 0.699655  | 0.730933 | 875.0   |
| GSVT         | 0.740358 | 0.751679  | 0.729439 | 691.0   |
| SB           | 0.789220 | 0.789324  | 0.789119 | 1553.0  |
| SR           | 0.768888 | 0.776850  | 0.761090 | 907.0   |
| macro avg    | 0.753350 | 0.754377  | 0.752645 | 4026.0  |
| micro avg    | 0.759915 | 0.759915  | 0.759915 | 4026.0  |
| weighted avg | 0.760108 | 0.760564  | 0.759915 | 4026.0  |

The result of Model Number:Dataset Number:Featuregroup Number:Rescale of 60 : 1 : 10 : 0

|      | f1-score | precision | recall   | support |
|------|----------|-----------|----------|---------|
| AFIB | 0.783697 | 0.790187  | 0.882727 | 204.0   |
| GSVT | 0.849866 | 0.813491  | 0.958848 | 300.0   |
| SB   | 0.775959 | 0.773263  | 0.778677 | 892.0   |

SR 0.768244 0.768389 0.768104 681.0  
macro avg 0.794442 0.786333 0.847089 2077.0  
micro avg 0.811454 0.811454 0.811454 2077.0  
weighted avg 0.784865 0.779138 0.811454 2077.0  
The result of Model Number:Dataset Number:Featuregroup Number:Rescale of 60 : 1 :

10 : 1

f1-score precision recall support

AFIB 0.690603 0.679546 0.777068 204.0  
GSVT 0.808514 0.799132 0.818413 300.0  
SB 0.835586 0.832430 0.838770 892.0  
SR 0.655616 0.659005 0.652372 681.0  
macro avg 0.747579 0.742529 0.771656 2077.0  
micro avg 0.768654 0.768654 0.768654 2077.0  
weighted avg 0.758427 0.755743 0.768654 2077.0

The result of Model Number:Dataset Number:Featuregroup Number:Rescale of 61 : 0 : 0 : 0

f1-score precision recall support

AFIB 0.758149 0.767886 0.748693 875.0  
GSVT 0.766536 0.760337 0.772960 691.0  
SB 0.819974 0.817509 0.822457 1553.0  
SR 0.799670 0.799334 0.800017 907.0  
macro avg 0.786082 0.786266 0.786031 4026.0  
micro avg 0.792874 0.792874 0.792874 4026.0  
weighted avg 0.792791 0.792817 0.792874 4026.0

The result of Model Number:Dataset Number:Featuregroup Number:Rescale of 61 : 0 : 0 : 1

f1-score precision recall support

AFIB 0.837762 0.830353 0.845339 875.0  
GSVT 0.761671 0.737620 0.847374 691.0  
SB 0.686688 0.659315 0.729494 1553.0  
SR 0.707731 0.715054 0.700602 907.0  
macro avg 0.748463 0.735586 0.780702 4026.0  
micro avg 0.768395 0.768395 0.768395 4026.0  
weighted avg 0.737132 0.722485 0.768395 4026.0

The result of Model Number:Dataset Number:Featuregroup Number:Rescale of 61 : 0 : 1 : 0

f1-score precision recall support

AFIB 0.702790 0.774169 0.644137 204.0  
GSVT 0.649023 0.693903 0.609899 300.0  
SB 0.706593 0.660222 0.759981 892.0  
SR 0.611568 0.643716 0.582647 681.0  
macro avg 0.667494 0.693002 0.649166 2077.0  
micro avg 0.668782 0.668782 0.668782 2077.0  
weighted avg 0.666748 0.670867 0.668782 2077.0

The result of Model Number:Dataset Number:Featuregroup Number:Rescale of 61 : 0 : 1 :  
1

|              | f1-score | precision | recall   | support |
|--------------|----------|-----------|----------|---------|
| AFIB         | 0.704459 | 0.697858  | 0.711213 | 875.0   |
| GSVT         | 0.716299 | 0.722043  | 0.710716 | 691.0   |
| SB           | 0.759314 | 0.756407  | 0.762248 | 1553.0  |
| SR           | 0.742325 | 0.749860  | 0.734960 | 907.0   |
| macro avg    | 0.730599 | 0.731542  | 0.729784 | 4026.0  |
| micro avg    | 0.736164 | 0.736164  | 0.736164 | 4026.0  |
| weighted avg | 0.736182 | 0.736309  | 0.736164 | 4026.0  |

The result of Model Number:Dataset Number:Featuregroup Number:Rescale of 61 : 0 : 2 :  
0

|              | f1-score | precision | recall   | support |
|--------------|----------|-----------|----------|---------|
| AFIB         | 0.675488 | 0.678705  | 0.672332 | 875.0   |
| GSVT         | 0.683833 | 0.671405  | 0.696799 | 691.0   |
| SB           | 0.723547 | 0.720776  | 0.726341 | 1553.0  |
| SR           | 0.702161 | 0.714179  | 0.690551 | 907.0   |
| macro avg    | 0.696257 | 0.696266  | 0.696506 | 4026.0  |
| micro avg    | 0.701469 | 0.701469  | 0.701469 | 4026.0  |
| weighted avg | 0.701468 | 0.701673  | 0.701469 | 4026.0  |

The result of Model Number:Dataset Number:Featuregroup Number:Rescale of 61 : 0 : 2 :  
1

|              | f1-score | precision | recall   | support |
|--------------|----------|-----------|----------|---------|
| AFIB         | 0.703144 | 0.776690  | 0.642527 | 204.0   |
| GSVT         | 0.827200 | 0.816278  | 0.838507 | 300.0   |
| SB           | 0.877243 | 0.873833  | 0.880684 | 892.0   |
| SR           | 0.856163 | 0.843961  | 0.868732 | 681.0   |
| macro avg    | 0.815937 | 0.827691  | 0.807612 | 2077.0  |
| micro avg    | 0.847282 | 0.847282  | 0.847282 | 2077.0  |
| weighted avg | 0.846003 | 0.846184  | 0.847282 | 2077.0  |

The result of Model Number:Dataset Number:Featuregroup Number:Rescale of 61 : 0 : 3 :  
0

|              | f1-score | precision | recall   | support |
|--------------|----------|-----------|----------|---------|
| AFIB         | 0.580522 | 0.652746  | 0.523201 | 204.0   |
| GSVT         | 0.688747 | 0.674040  | 0.704141 | 300.0   |
| SB           | 0.735250 | 0.731502  | 0.739041 | 892.0   |
| SR           | 0.718756 | 0.709654  | 0.728140 | 681.0   |
| macro avg    | 0.680819 | 0.691985  | 0.673631 | 2077.0  |
| micro avg    | 0.709226 | 0.709226  | 0.709226 | 2077.0  |
| weighted avg | 0.707928 | 0.708303  | 0.709226 | 2077.0  |

The result of Model Number:Dataset Number:Featuregroup Number:Rescale of 61 : 0 : 3 :  
1

|      | f1-score | precision | recall   | support |
|------|----------|-----------|----------|---------|
| AFIB | 0.745045 | 0.744678  | 0.745469 | 875.0   |

GSVT 0.761218 0.757472 0.765048 691.0  
SB 0.796247 0.791042 0.801527 1553.0  
SR 0.773581 0.786181 0.761398 907.0  
macro avg 0.769023 0.769843 0.768361 4026.0  
micro avg 0.774042 0.774042 0.774042 4026.0  
weighted avg 0.774000 0.774109 0.774042 4026.0  
The result of Model Number:Dataset Number:Featuregroup Number:Rescale of 61 : 0 : 4 :  
0

f1-score precision recall support

AFIB 0.729861 0.724929 0.734961 875.0  
GSVT 0.747667 0.747965 0.747466 691.0  
SB 0.794244 0.792217 0.796290 1553.0  
SR 0.772618 0.781250 0.764185 907.0  
macro avg 0.761098 0.761590 0.760725 4026.0  
micro avg 0.767348 0.767348 0.767348 4026.0  
weighted avg 0.767385 0.767527 0.767348 4026.0  
The result of Model Number:Dataset Number:Featuregroup Number:Rescale of 61 : 0 : 4 :  
1

f1-score precision recall support

AFIB 0.815830 0.820483 0.811365 204.0  
GSVT 0.832616 0.826611 0.838718 300.0  
SB 0.849432 0.846329 0.852572 892.0  
SR 0.840398 0.845916 0.834973 681.0  
macro avg 0.834569 0.834835 0.834407 2077.0  
micro avg 0.840753 0.840753 0.840753 2077.0  
weighted avg 0.840741 0.840807 0.840753 2077.0  
The result of Model Number:Dataset Number:Featuregroup Number:Rescale of 61 : 0 : 5 :  
0

f1-score precision recall support

AFIB 0.734327 0.748398 0.720963 204.0  
GSVT 0.757679 0.753776 0.761692 300.0  
SB 0.776417 0.775207 0.777635 892.0  
SR 0.768766 0.768002 0.769555 681.0  
macro avg 0.759297 0.761346 0.757461 2077.0  
micro avg 0.767117 0.767117 0.767117 2077.0  
weighted avg 0.767068 0.767116 0.767117 2077.0  
The result of Model Number:Dataset Number:Featuregroup Number:Rescale of 61 : 0 : 5 :  
1

f1-score precision recall support

AFIB 0.860929 0.928030 0.803276 204.0  
GSVT 0.887183 0.902201 0.872694 300.0  
SB 0.940247 0.931593 0.949091 892.0  
SR 0.902824 0.889732 0.916349 681.0  
macro avg 0.897795 0.912889 0.885353 2077.0

micro avg 0.912999 0.912999 0.912999 2077.0  
weighted avg 0.912522 0.913272 0.912999 2077.0  
The result of Model Number:Dataset Number:Featuregroup Number:Rescale of 61 : 0 : 6 :  
0

|              | f1-score | precision | recall   | support |
|--------------|----------|-----------|----------|---------|
| AFIB         | 0.638523 | 0.706039  | 0.583124 | 204.0   |
| GSVT         | 0.734704 | 0.726201  | 0.743549 | 300.0   |
| SB           | 0.776787 | 0.773593  | 0.780009 | 892.0   |
| SR           | 0.760105 | 0.748846  | 0.771716 | 681.0   |
| macro avg    | 0.727530 | 0.738670  | 0.719599 | 2077.0  |
| micro avg    | 0.752686 | 0.752686  | 0.752686 | 2077.0  |
| weighted avg | 0.751659 | 0.751999  | 0.752686 | 2077.0  |

The result of Model Number:Dataset Number:Featuregroup Number:Rescale of 61 : 0 : 6 :  
1

|              | f1-score | precision | recall   | support |
|--------------|----------|-----------|----------|---------|
| AFIB         | 0.793691 | 0.784330  | 0.803319 | 875.0   |
| GSVT         | 0.807136 | 0.812243  | 0.802122 | 691.0   |
| SB           | 0.860563 | 0.859406  | 0.861727 | 1553.0  |
| SR           | 0.839422 | 0.847374  | 0.831645 | 907.0   |
| macro avg    | 0.825203 | 0.825838  | 0.824703 | 4026.0  |
| micro avg    | 0.832025 | 0.832025  | 0.832025 | 4026.0  |
| weighted avg | 0.832097 | 0.832284  | 0.832025 | 4026.0  |

The result of Model Number:Dataset Number:Featuregroup Number:Rescale of 61 : 0 : 7 :  
0

|              | f1-score | precision | recall   | support |
|--------------|----------|-----------|----------|---------|
| AFIB         | 0.774323 | 0.791849  | 0.757655 | 204.0   |
| GSVT         | 0.794929 | 0.791037  | 0.798894 | 300.0   |
| SB           | 0.811191 | 0.808848  | 0.813553 | 892.0   |
| SR           | 0.805979 | 0.805631  | 0.806340 | 681.0   |
| macro avg    | 0.796606 | 0.799341  | 0.794110 | 2077.0  |
| micro avg    | 0.803580 | 0.803580  | 0.803580 | 2077.0  |
| weighted avg | 0.803512 | 0.803551  | 0.803580 | 2077.0  |

The result of Model Number:Dataset Number:Featuregroup Number:Rescale of 61 : 0 : 7 :  
1

|              | f1-score | precision | recall   | support |
|--------------|----------|-----------|----------|---------|
| AFIB         | 0.817246 | 0.818662  | 0.815848 | 875.0   |
| GSVT         | 0.827155 | 0.817651  | 0.836952 | 691.0   |
| SB           | 0.871023 | 0.860520  | 0.881789 | 1553.0  |
| SR           | 0.829621 | 0.854758  | 0.805939 | 907.0   |
| macro avg    | 0.836262 | 0.837898  | 0.835132 | 4026.0  |
| micro avg    | 0.842674 | 0.842674  | 0.842674 | 4026.0  |
| weighted avg | 0.842479 | 0.842767  | 0.842674 | 4026.0  |

The result of Model Number:Dataset Number:Featuregroup Number:Rescale of 61 : 0 : 8 :  
0

f1-score precision recall support  
AFIB 0.912616 0.942258 0.884962 204.0  
GSVT 0.937813 0.925855 0.950272 300.0  
SB 0.964271 0.960635 0.967945 892.0  
SR 0.950784 0.952506 0.949105 681.0  
macro avg 0.941371 0.945313 0.938071 2077.0  
micro avg 0.951065 0.951065 0.951065 2077.0  
weighted avg 0.950954 0.951141 0.951065 2077.0  
The result of Model Number:Dataset Number:Featuregroup Number:Rescale of 61 : 0 : 8 :  
1

f1-score precision recall support  
AFIB 0.725246 0.723015 0.727536 875.0  
GSVT 0.706758 0.710224 0.703438 691.0  
SB 0.743001 0.712168 0.776632 1553.0  
SR 0.639414 0.697637 0.590211 907.0  
macro avg 0.703605 0.710761 0.699454 4026.0  
micro avg 0.711401 0.711401 0.711401 4026.0  
weighted avg 0.709585 0.710918 0.711401 4026.0  
The result of Model Number:Dataset Number:Featuregroup Number:Rescale of 61 : 0 : 9 :  
0

f1-score precision recall support  
AFIB 0.770329 0.780530 0.760507 204.0  
GSVT 0.793575 0.790711 0.796478 300.0  
SB 0.803460 0.800959 0.805979 892.0  
SR 0.794705 0.796236 0.793202 681.0  
macro avg 0.790517 0.792109 0.789042 2077.0  
micro avg 0.795951 0.795951 0.795951 2077.0  
weighted avg 0.795907 0.795924 0.795951 2077.0  
The result of Model Number:Dataset Number:Featuregroup Number:Rescale of 61 : 0 : 9 :  
1

f1-score precision recall support  
AFIB 0.696834 0.712357 0.682173 204.0  
GSVT 0.705431 0.695099 0.716368 300.0  
SB 0.721372 0.714203 0.728717 892.0  
SR 0.708065 0.718235 0.698201 681.0  
macro avg 0.707925 0.709973 0.706365 2077.0  
micro avg 0.712356 0.712356 0.712356 2077.0  
weighted avg 0.712296 0.712584 0.712356 2077.0  
The result of Model Number:Dataset Number:Featuregroup Number:Rescale of 61 : 0 :  
10 : 0

f1-score precision recall support  
AFIB 0.717120 0.708117 0.726564 875.0  
GSVT 0.665346 0.685490 0.648576 691.0  
SB 0.716350 0.663499 0.780245 1553.0

SR 0.556985 0.681707 0.474953 907.0  
macro avg 0.663950 0.684703 0.657585 4026.0  
micro avg 0.677201 0.677201 0.677201 4026.0  
weighted avg 0.671861 0.681073 0.677201 4026.0  
The result of Model Number:Dataset Number:Featuregroup Number:Rescale of 61 : 0 :  
10 : 1

f1-score precision recall support  
AFIB 0.737274 0.746743 0.728079 875.0  
GSVT 0.745430 0.739402 0.751677 691.0  
SB 0.797397 0.795000 0.799811 1553.0  
SR 0.777652 0.777325 0.777990 907.0  
macro avg 0.764438 0.764618 0.764389 4026.0  
micro avg 0.771044 0.771044 0.771044 4026.0  
weighted avg 0.770963 0.770988 0.771044 4026.0  
The result of Model Number:Dataset Number:Featuregroup Number:Rescale of 61 : 1 : 0 :  
0

f1-score precision recall support  
AFIB 0.744219 0.836808 0.670734 204.0  
GSVT 0.882961 0.864107 0.902696 300.0  
SB 0.942578 0.937773 0.947437 892.0  
SR 0.921432 0.909763 0.933463 681.0  
macro avg 0.872797 0.887113 0.863582 2077.0  
micro avg 0.909215 0.909215 0.909215 2077.0  
weighted avg 0.907551 0.908032 0.909215 2077.0  
The result of Model Number:Dataset Number:Featuregroup Number:Rescale of 61 : 1 : 0 :  
1

f1-score precision recall support  
AFIB 0.634374 0.628262 0.640703 875.0  
GSVT 0.650994 0.652856 0.649210 691.0  
SB 0.692119 0.690527 0.693723 1553.0  
SR 0.672649 0.680564 0.664931 907.0  
macro avg 0.662534 0.663052 0.662142 4026.0  
micro avg 0.668073 0.668073 0.668073 4026.0  
weighted avg 0.668124 0.668285 0.668073 4026.0  
The result of Model Number:Dataset Number:Featuregroup Number:Rescale of 61 : 1 : 1 :  
0

f1-score precision recall support  
AFIB 0.755667 0.746180 0.765618 875.0  
GSVT 0.701109 0.722337 0.683438 691.0  
SB 0.754856 0.699163 0.822185 1553.0  
SR 0.586924 0.718351 0.500483 907.0  
macro avg 0.699639 0.721507 0.692931 4026.0  
micro avg 0.713602 0.713602 0.713602 4026.0  
weighted avg 0.707975 0.717682 0.713602 4026.0



The result of Model Number:Dataset Number:Featuregroup Number:Rescale of 61 : 1 : 1 : 1

|              | f1-score | precision | recall   | support |
|--------------|----------|-----------|----------|---------|
| AFIB         | 0.716385 | 0.748734  | 0.686949 | 204.0   |
| GSVT         | 0.741301 | 0.732976  | 0.749953 | 300.0   |
| SB           | 0.713104 | 0.682014  | 0.763032 | 892.0   |
| SR           | 0.594114 | 0.599179  | 0.589234 | 681.0   |
| macro avg    | 0.691226 | 0.690726  | 0.697292 | 2077.0  |
| micro avg    | 0.696686 | 0.696686  | 0.696686 | 2077.0  |
| weighted avg | 0.678485 | 0.668768  | 0.696686 | 2077.0  |

The result of Model Number:Dataset Number:Featuregroup Number:Rescale of 61 : 1 : 2 : 0

|              | f1-score | precision | recall   | support |
|--------------|----------|-----------|----------|---------|
| AFIB         | 0.746065 | 0.747560  | 0.744608 | 875.0   |
| GSVT         | 0.747913 | 0.743875  | 0.752014 | 691.0   |
| SB           | 0.781820 | 0.777643  | 0.786047 | 1553.0  |
| SR           | 0.763116 | 0.772166  | 0.754297 | 907.0   |
| macro avg    | 0.759728 | 0.760311  | 0.759242 | 4026.0  |
| micro avg    | 0.764047 | 0.764047  | 0.764047 | 4026.0  |
| weighted avg | 0.764016 | 0.764075  | 0.764047 | 4026.0  |

The result of Model Number:Dataset Number:Featuregroup Number:Rescale of 61 : 1 : 2 : 1

|              | f1-score | precision | recall   | support |
|--------------|----------|-----------|----------|---------|
| AFIB         | 0.886639 | 0.895307  | 0.878345 | 875.0   |
| GSVT         | 0.879867 | 0.873191  | 0.886935 | 691.0   |
| SB           | 0.930999 | 0.921420  | 0.940861 | 1553.0  |
| SR           | 0.901448 | 0.915945  | 0.887657 | 907.0   |
| macro avg    | 0.899738 | 0.901466  | 0.898449 | 4026.0  |
| micro avg    | 0.906032 | 0.906032  | 0.906032 | 4026.0  |
| weighted avg | 0.905924 | 0.906233  | 0.906032 | 4026.0  |

The result of Model Number:Dataset Number:Featuregroup Number:Rescale of 61 : 1 : 3 : 0

|              | f1-score | precision | recall   | support |
|--------------|----------|-----------|----------|---------|
| AFIB         | 0.864583 | 0.923186  | 0.813551 | 204.0   |
| GSVT         | 0.814642 | 0.838812  | 0.792131 | 300.0   |
| SB           | 0.851504 | 0.810628  | 0.897207 | 892.0   |
| SR           | 0.755553 | 0.789856  | 0.724929 | 681.0   |
| macro avg    | 0.821570 | 0.840620  | 0.806954 | 2077.0  |
| micro avg    | 0.817327 | 0.817327  | 0.817327 | 2077.0  |
| weighted avg | 0.816004 | 0.818943  | 0.817327 | 2077.0  |

The result of Model Number:Dataset Number:Featuregroup Number:Rescale of 61 : 1 : 3 : 1

|      | f1-score | precision | recall   | support |
|------|----------|-----------|----------|---------|
| AFIB | 0.841135 | 0.852370  | 0.830429 | 204.0   |

GSVT 0.855994 0.850780 0.861404 300.0  
SB 0.876628 0.875851 0.877413 892.0  
SR 0.870151 0.870283 0.870024 681.0  
macro avg 0.860977 0.862321 0.859818 2077.0  
micro avg 0.868063 0.868063 0.868063 2077.0  
weighted avg 0.868038 0.868098 0.868063 2077.0  
The result of Model Number:Dataset Number:Featuregroup Number:Rescale of 61 : 1 : 4 :  
0

f1-score precision recall support  
AFIB 0.723746 0.730796 0.717007 204.0  
GSVT 0.740483 0.737083 0.743939 300.0  
SB 0.750716 0.748133 0.753322 892.0  
SR 0.744376 0.747264 0.741545 681.0  
macro avg 0.739830 0.740819 0.738953 2077.0  
micro avg 0.744539 0.744539 0.744539 2077.0  
weighted avg 0.744510 0.744549 0.744539 2077.0  
The result of Model Number:Dataset Number:Featuregroup Number:Rescale of 61 : 1 : 4 :  
1

f1-score precision recall support  
AFIB 0.812736 0.837566 0.789426 875.0  
GSVT 0.862487 0.859566 0.865504 691.0  
SB 0.942478 0.938692 0.946300 1553.0  
SR 0.892632 0.877149 0.908759 907.0  
macro avg 0.877583 0.878243 0.877497 4026.0  
micro avg 0.889880 0.889880 0.889880 4026.0  
weighted avg 0.889321 0.889268 0.889880 4026.0  
The result of Model Number:Dataset Number:Featuregroup Number:Rescale of 61 : 1 : 5 :  
0

f1-score precision recall support  
AFIB 0.629133 0.610329 0.670820 875.0  
GSVT 0.538759 0.526961 0.551297 691.0  
SB 0.714600 0.708778 0.720709 1553.0  
SR 0.670398 0.698544 0.645690 907.0  
macro avg 0.638223 0.636153 0.647129 4026.0  
micro avg 0.663889 0.663889 0.663889 4026.0  
weighted avg 0.655887 0.653870 0.663889 4026.0  
The result of Model Number:Dataset Number:Featuregroup Number:Rescale of 61 : 1 : 5 :  
1

f1-score precision recall support  
AFIB 0.633688 0.638287 0.629200 875.0  
GSVT 0.647588 0.641569 0.653770 691.0  
SB 0.695967 0.691766 0.700225 1553.0  
SR 0.673158 0.680674 0.665808 907.0  
macro avg 0.662600 0.663074 0.662251 4026.0

micro avg 0.669061 0.669061 0.669061 4026.0  
weighted avg 0.668989 0.669028 0.669061 4026.0  
The result of Model Number:Dataset Number:Featuregroup Number:Rescale of 61 : 1 : 6 :  
0

|              | f1-score | precision | recall   | support |
|--------------|----------|-----------|----------|---------|
| AFIB         | 0.901895 | 0.926757  | 0.878512 | 204.0   |
| GSVT         | 0.925897 | 0.908757  | 0.943784 | 300.0   |
| SB           | 0.940913 | 0.932117  | 0.949879 | 892.0   |
| SR           | 0.917263 | 0.929724  | 0.905146 | 681.0   |
| macro avg    | 0.921492 | 0.924339  | 0.919330 | 2077.0  |
| micro avg    | 0.927322 | 0.927322  | 0.927322 | 2077.0  |
| weighted avg | 0.927157 | 0.927432  | 0.927322 | 2077.0  |

The result of Model Number:Dataset Number:Featuregroup Number:Rescale of 61 : 1 : 6 :  
1

|              | f1-score | precision | recall   | support |
|--------------|----------|-----------|----------|---------|
| AFIB         | 0.677496 | 0.675538  | 0.679528 | 875.0   |
| GSVT         | 0.690053 | 0.689492  | 0.690663 | 691.0   |
| SB           | 0.732936 | 0.729901  | 0.736003 | 1553.0  |
| SR           | 0.710933 | 0.718743  | 0.703329 | 907.0   |
| macro avg    | 0.702855 | 0.703418  | 0.702381 | 4026.0  |
| micro avg    | 0.708586 | 0.708586  | 0.708586 | 4026.0  |
| weighted avg | 0.708570 | 0.708636  | 0.708586 | 4026.0  |

The result of Model Number:Dataset Number:Featuregroup Number:Rescale of 61 : 1 : 7 :  
0

|              | f1-score | precision | recall   | support |
|--------------|----------|-----------|----------|---------|
| AFIB         | 0.777345 | 0.802262  | 0.754162 | 204.0   |
| GSVT         | 0.800601 | 0.786827  | 0.814984 | 300.0   |
| SB           | 0.814450 | 0.806399  | 0.822666 | 892.0   |
| SR           | 0.792673 | 0.802593  | 0.783014 | 681.0   |
| macro avg    | 0.796267 | 0.799520  | 0.793706 | 2077.0  |
| micro avg    | 0.801827 | 0.801827  | 0.801827 | 2077.0  |
| weighted avg | 0.801665 | 0.801918  | 0.801827 | 2077.0  |

The result of Model Number:Dataset Number:Featuregroup Number:Rescale of 61 : 1 : 7 :  
1

|              | f1-score | precision | recall   | support |
|--------------|----------|-----------|----------|---------|
| AFIB         | 0.763023 | 0.777045  | 0.749591 | 204.0   |
| GSVT         | 0.775839 | 0.770758  | 0.781008 | 300.0   |
| SB           | 0.789110 | 0.785258  | 0.793003 | 892.0   |
| SR           | 0.780954 | 0.784201  | 0.777745 | 681.0   |
| macro avg    | 0.777232 | 0.779315  | 0.775337 | 2077.0  |
| micro avg    | 0.782004 | 0.782004  | 0.782004 | 2077.0  |
| weighted avg | 0.781957 | 0.782010  | 0.782004 | 2077.0  |

The result of Model Number:Dataset Number:Featuregroup Number:Rescale of 61 : 1 : 8 :  
0

f1-score precision recall support  
AFIB 0.699128 0.690202 0.708329 875.0  
GSVT 0.711399 0.715479 0.707385 691.0  
SB 0.761509 0.758311 0.764742 1553.0  
SR 0.739087 0.751050 0.727512 907.0  
macro avg 0.727781 0.728761 0.726992 4026.0  
micro avg 0.734250 0.734250 0.734250 4026.0  
weighted avg 0.734299 0.734521 0.734250 4026.0  
The result of Model Number:Dataset Number:Featuregroup Number:Rescale of 61 : 1 : 8 :  
1

f1-score precision recall support  
AFIB 0.922799 0.941392 0.905520 204.0  
GSVT 0.952409 0.944760 0.960367 300.0  
SB 0.973028 0.972048 0.974010 892.0  
SR 0.964158 0.963605 0.964724 681.0  
macro avg 0.953099 0.955451 0.951155 2077.0  
micro avg 0.962268 0.962268 0.962268 2077.0  
weighted avg 0.962208 0.962328 0.962268 2077.0  
The result of Model Number:Dataset Number:Featuregroup Number:Rescale of 61 : 1 : 9 :  
0

f1-score precision recall support  
AFIB 0.747003 0.766559 0.728761 204.0  
GSVT 0.702878 0.723306 0.683955 300.0  
SB 0.741687 0.715574 0.769792 892.0  
SR 0.672249 0.694142 0.651830 681.0  
macro avg 0.715954 0.724895 0.708584 2077.0  
micro avg 0.714687 0.714687 0.714687 2077.0  
weighted avg 0.713836 0.714671 0.714687 2077.0  
The result of Model Number:Dataset Number:Featuregroup Number:Rescale of 61 : 1 : 9 :  
1

f1-score precision recall support  
AFIB 0.624824 0.622902 0.626797 875.0  
GSVT 0.608896 0.611882 0.606036 691.0  
SB 0.640120 0.613556 0.669094 1553.0  
SR 0.550877 0.601037 0.508487 907.0  
macro avg 0.606179 0.612344 0.602603 4026.0  
micro avg 0.612896 0.612896 0.612896 4026.0  
weighted avg 0.611331 0.612480 0.612896 4026.0  
The result of Model Number:Dataset Number:Featuregroup Number:Rescale of 61 : 1 :  
10 : 0

f1-score precision recall support  
AFIB 0.791633 0.803635 0.780004 204.0  
GSVT 0.804362 0.797581 0.811301 300.0  
SB 0.822204 0.819551 0.824875 892.0

SR 0.813378 0.816399 0.810401 681.0  
macro avg 0.807894 0.809292 0.806645 2077.0  
micro avg 0.813762 0.813762 0.813762 2077.0  
weighted avg 0.813730 0.813781 0.813762 2077.0  
The result of Model Number:Dataset Number:Featuregroup Number:Rescale of 61 : 1 :

10 : 1

f1-score precision recall support

AFIB 0.780288 0.780039 0.780579 875.0  
GSVT 0.791917 0.781738 0.802458 691.0  
SB 0.837642 0.835820 0.839476 1553.0  
SR 0.814466 0.826405 0.802881 907.0  
macro avg 0.806078 0.806000 0.806348 4026.0  
micro avg 0.812077 0.812077 0.812077 4026.0  
weighted avg 0.812108 0.812293 0.812077 4026.0

The result of Model Number:Dataset Number:Featuregroup Number:Rescale of 62 : 0 : 0 : 0

f1-score precision recall support

AFIB 0.697427 0.697551 0.697333 875.0  
GSVT 0.704805 0.707186 0.702485 691.0  
SB 0.740362 0.737809 0.742936 1553.0  
SR 0.726303 0.728753 0.723896 907.0  
macro avg 0.717224 0.717825 0.716662 4026.0  
micro avg 0.721792 0.721792 0.721792 4026.0  
weighted avg 0.721760 0.721763 0.721792 4026.0

The result of Model Number:Dataset Number:Featuregroup Number:Rescale of 62 : 0 : 0 : 1

f1-score precision recall support

AFIB 0.818187 0.836689 0.800510 875.0  
GSVT 0.867464 0.871156 0.863854 691.0  
SB 0.941886 0.937447 0.946373 1553.0  
SR 0.892424 0.878735 0.906583 907.0  
macro avg 0.879990 0.881007 0.879330 4026.0  
micro avg 0.891544 0.891544 0.891544 4026.0  
weighted avg 0.891085 0.890944 0.891544 4026.0

The result of Model Number:Dataset Number:Featuregroup Number:Rescale of 62 : 0 : 1 : 0

f1-score precision recall support

AFIB 0.908576 0.928816 0.889460 204.0  
GSVT 0.919785 0.906314 0.934046 300.0  
SB 0.940570 0.931223 0.950148 892.0  
SR 0.923220 0.936480 0.910358 681.0  
macro avg 0.923038 0.925708 0.921003 2077.0  
micro avg 0.928815 0.928815 0.928815 2077.0  
weighted avg 0.928737 0.929112 0.928815 2077.0

The result of Model Number:Dataset Number:Featuregroup Number:Rescale of 62 : 0 : 1 : 1

|              | f1-score | precision | recall   | support |
|--------------|----------|-----------|----------|---------|
| AFIB         | 0.763098 | 0.845326  | 0.696061 | 204.0   |
| GSVT         | 0.899493 | 0.886885  | 0.912697 | 300.0   |
| SB           | 0.955044 | 0.951969  | 0.958148 | 892.0   |
| SR           | 0.930592 | 0.916437  | 0.945215 | 681.0   |
| macro avg    | 0.887057 | 0.900154  | 0.878030 | 2077.0  |
| micro avg    | 0.921601 | 0.921601  | 0.921601 | 2077.0  |
| weighted avg | 0.920150 | 0.920444  | 0.921601 | 2077.0  |

The result of Model Number:Dataset Number:Featuregroup Number:Rescale of 62 : 0 : 2 : 0

|              | f1-score | precision | recall   | support |
|--------------|----------|-----------|----------|---------|
| AFIB         | 0.726868 | 0.723208  | 0.730597 | 875.0   |
| GSVT         | 0.741025 | 0.744613  | 0.737484 | 691.0   |
| SB           | 0.789237 | 0.787421  | 0.791065 | 1553.0  |
| SR           | 0.769479 | 0.773596  | 0.765414 | 907.0   |
| macro avg    | 0.756652 | 0.757209  | 0.756140 | 4026.0  |
| micro avg    | 0.762948 | 0.762948  | 0.762948 | 4026.0  |
| weighted avg | 0.762956 | 0.763003  | 0.762948 | 4026.0  |

The result of Model Number:Dataset Number:Featuregroup Number:Rescale of 62 : 0 : 2 : 1

|              | f1-score | precision | recall   | support |
|--------------|----------|-----------|----------|---------|
| AFIB         | 0.642062 | 0.652488  | 0.631998 | 875.0   |
| GSVT         | 0.682852 | 0.684991  | 0.680766 | 691.0   |
| SB           | 0.742908 | 0.740348  | 0.745490 | 1553.0  |
| SR           | 0.703317 | 0.695484  | 0.711372 | 907.0   |
| macro avg    | 0.692785 | 0.693328  | 0.692407 | 4026.0  |
| micro avg    | 0.702029 | 0.702029  | 0.702029 | 4026.0  |
| weighted avg | 0.701763 | 0.701644  | 0.702029 | 4026.0  |

The result of Model Number:Dataset Number:Featuregroup Number:Rescale of 62 : 0 : 3 : 0

|              | f1-score | precision | recall   | support |
|--------------|----------|-----------|----------|---------|
| AFIB         | 0.660524 | 0.660618  | 0.660516 | 875.0   |
| GSVT         | 0.672060 | 0.666489  | 0.677775 | 691.0   |
| SB           | 0.703638 | 0.697551  | 0.709843 | 1553.0  |
| SR           | 0.680451 | 0.695823  | 0.665768 | 907.0   |
| macro avg    | 0.679168 | 0.680120  | 0.678475 | 4026.0  |
| micro avg    | 0.683689 | 0.683689  | 0.683689 | 4026.0  |
| weighted avg | 0.683624 | 0.683803  | 0.683689 | 4026.0  |

The result of Model Number:Dataset Number:Featuregroup Number:Rescale of 62 : 0 : 3 : 1

|      | f1-score | precision | recall   | support |
|------|----------|-----------|----------|---------|
| AFIB | 0.864543 | 0.845971  | 0.883996 | 875.0   |

GSVT 0.895325 0.908309 0.882766 691.0  
SB 0.953109 0.952928 0.953294 1553.0  
SR 0.929221 0.940021 0.918671 907.0  
macro avg 0.910550 0.911807 0.909682 4026.0  
micro avg 0.918328 0.918328 0.918328 4026.0  
weighted avg 0.918561 0.919116 0.918328 4026.0  
The result of Model Number:Dataset Number:Featuregroup Number:Rescale of 62 : 0 : 4 :  
0

f1-score precision recall support  
AFIB 0.675208 0.744611 0.618055 204.0  
GSVT 0.803478 0.792620 0.814718 300.0  
SB 0.855647 0.852225 0.859100 892.0  
SR 0.832423 0.821171 0.844025 681.0  
macro avg 0.791689 0.802657 0.783974 2077.0  
micro avg 0.824071 0.824071 0.824071 2077.0  
weighted avg 0.822775 0.822864 0.824071 2077.0  
The result of Model Number:Dataset Number:Featuregroup Number:Rescale of 62 : 0 : 4 :  
1

f1-score precision recall support  
AFIB 0.775284 0.782323 0.768769 204.0  
GSVT 0.800908 0.796068 0.806017 300.0  
SB 0.817664 0.816568 0.818764 892.0  
SR 0.810098 0.811778 0.808431 681.0  
macro avg 0.800989 0.801684 0.800495 2077.0  
micro avg 0.808624 0.808624 0.808624 2077.0  
weighted avg 0.808601 0.808673 0.808624 2077.0  
The result of Model Number:Dataset Number:Featuregroup Number:Rescale of 62 : 0 : 5 :  
0

f1-score precision recall support  
AFIB 0.774119 0.789120 0.760026 204.0  
GSVT 0.804138 0.797414 0.811124 300.0  
SB 0.819142 0.817498 0.820795 892.0  
SR 0.811331 0.812172 0.810496 681.0  
macro avg 0.802182 0.804051 0.800610 2077.0  
micro avg 0.810052 0.810052 0.810052 2077.0  
weighted avg 0.809992 0.810063 0.810052 2077.0  
The result of Model Number:Dataset Number:Featuregroup Number:Rescale of 62 : 0 : 5 :  
1

f1-score precision recall support  
AFIB 0.648854 0.676956 0.623177 204.0  
GSVT 0.606566 0.612226 0.601313 300.0  
SB 0.628749 0.597837 0.663077 892.0  
SR 0.560386 0.595751 0.529166 681.0  
macro avg 0.611139 0.620693 0.604183 2077.0

micro avg 0.606331 0.606331 0.606331 2077.0  
weighted avg 0.605105 0.607002 0.606331 2077.0  
The result of Model Number:Dataset Number:Featuregroup Number:Rescale of 62 : 0 : 6 :  
0

|              | f1-score | precision | recall   | support |
|--------------|----------|-----------|----------|---------|
| AFIB         | 0.681127 | 0.697472  | 0.665841 | 204.0   |
| GSVT         | 0.705346 | 0.701258  | 0.709568 | 300.0   |
| SB           | 0.720410 | 0.717767  | 0.723074 | 892.0   |
| SR           | 0.714150 | 0.714679  | 0.713629 | 681.0   |
| macro avg    | 0.705258 | 0.707794  | 0.703028 | 2077.0  |
| micro avg    | 0.712405 | 0.712405  | 0.712405 | 2077.0  |
| weighted avg | 0.712323 | 0.712377  | 0.712405 | 2077.0  |

The result of Model Number:Dataset Number:Featuregroup Number:Rescale of 62 : 0 : 6 :  
1

|              | f1-score | precision | recall   | support |
|--------------|----------|-----------|----------|---------|
| AFIB         | 0.819276 | 0.827201  | 0.811650 | 204.0   |
| GSVT         | 0.848267 | 0.846594  | 0.849960 | 300.0   |
| SB           | 0.865997 | 0.864463  | 0.867548 | 892.0   |
| SR           | 0.858014 | 0.858429  | 0.857635 | 681.0   |
| macro avg    | 0.847888 | 0.849172  | 0.846698 | 2077.0  |
| micro avg    | 0.856267 | 0.856267  | 0.856267 | 2077.0  |
| weighted avg | 0.856230 | 0.856244  | 0.856267 | 2077.0  |

The result of Model Number:Dataset Number:Featuregroup Number:Rescale of 62 : 0 : 7 :  
0

|              | f1-score | precision | recall   | support |
|--------------|----------|-----------|----------|---------|
| AFIB         | 0.648567 | 0.623773  | 0.689364 | 875.0   |
| GSVT         | 0.672026 | 0.648832  | 0.703485 | 691.0   |
| SB           | 0.748761 | 0.735545  | 0.763284 | 1553.0  |
| SR           | 0.634184 | 0.762569  | 0.547532 | 907.0   |
| macro avg    | 0.675885 | 0.692680  | 0.675916 | 4026.0  |
| micro avg    | 0.688349 | 0.688349  | 0.688349 | 4026.0  |
| weighted avg | 0.688002 | 0.702458  | 0.688349 | 4026.0  |

The result of Model Number:Dataset Number:Featuregroup Number:Rescale of 62 : 0 : 7 :  
1

|              | f1-score | precision | recall   | support |
|--------------|----------|-----------|----------|---------|
| AFIB         | 0.790215 | 0.861783  | 0.730939 | 204.0   |
| GSVT         | 0.917188 | 0.906708  | 0.928197 | 300.0   |
| SB           | 0.972624 | 0.970134  | 0.975132 | 892.0   |
| SR           | 0.948810 | 0.935962  | 0.962043 | 681.0   |
| macro avg    | 0.907209 | 0.918647  | 0.899078 | 2077.0  |
| micro avg    | 0.940077 | 0.940077  | 0.940077 | 2077.0  |
| weighted avg | 0.938893 | 0.939127  | 0.940077 | 2077.0  |

The result of Model Number:Dataset Number:Featuregroup Number:Rescale of 62 : 0 : 8 :  
0



f1-score precision recall support  
AFIB 0.712204 0.760479 0.670166 204.0  
GSVT 0.671065 0.690976 0.652522 300.0  
SB 0.701430 0.667759 0.739078 892.0  
SR 0.622390 0.650647 0.597164 681.0  
macro avg 0.676773 0.692465 0.664733 2077.0  
micro avg 0.673277 0.673277 0.673277 2077.0  
weighted avg 0.672187 0.674609 0.673277 2077.0  
The result of Model Number:Dataset Number:Featuregroup Number:Rescale of 62 : 0 : 8 :  
1

f1-score precision recall support  
AFIB 0.739336 0.737287 0.741452 875.0  
GSVT 0.745187 0.748741 0.741740 691.0  
SB 0.780080 0.777587 0.782591 1553.0  
SR 0.767608 0.771316 0.763972 907.0  
macro avg 0.758052 0.758732 0.757439 4026.0  
micro avg 0.762444 0.762444 0.762444 4026.0  
weighted avg 0.762426 0.762464 0.762444 4026.0  
The result of Model Number:Dataset Number:Featuregroup Number:Rescale of 62 : 0 : 9 :  
0

f1-score precision recall support  
AFIB 0.688005 0.689196 0.686827 875.0  
GSVT 0.696347 0.688345 0.704594 691.0  
SB 0.733277 0.724435 0.742340 1553.0  
SR 0.698422 0.719584 0.678485 907.0  
macro avg 0.704013 0.705390 0.703061 4026.0  
micro avg 0.709411 0.709411 0.709411 4026.0  
weighted avg 0.709247 0.709489 0.709411 4026.0  
The result of Model Number:Dataset Number:Featuregroup Number:Rescale of 62 : 0 : 9 :  
1

f1-score precision recall support  
AFIB 0.857913 0.863918 0.852023 204.0  
GSVT 0.877874 0.873546 0.882258 300.0  
SB 0.895322 0.893832 0.896828 892.0  
SR 0.886411 0.888515 0.884327 681.0  
macro avg 0.879380 0.879953 0.878859 2077.0  
micro avg 0.886224 0.886224 0.886224 2077.0  
weighted avg 0.886206 0.886220 0.886224 2077.0  
The result of Model Number:Dataset Number:Featuregroup Number:Rescale of 62 : 0 :  
10 : 0

f1-score precision recall support  
AFIB 0.849157 0.851266 0.847116 875.0  
GSVT 0.863781 0.866376 0.861310 691.0  
SB 0.916316 0.910096 0.922627 1553.0

SR 0.898879 0.905552 0.892338 907.0  
macro avg 0.882033 0.883322 0.880848 4026.0  
micro avg 0.888868 0.888868 0.888868 4026.0  
weighted avg 0.888775 0.888782 0.888868 4026.0  
The result of Model Number:Dataset Number:Featuregroup Number:Rescale of 62 : 0 :  
10 : 1

f1-score precision recall support  
AFIB 0.815905 0.806032 0.826060 875.0  
GSVT 0.826950 0.835428 0.818706 691.0  
SB 0.878304 0.875446 0.881188 1553.0  
SR 0.859093 0.867921 0.850474 907.0  
macro avg 0.845063 0.846207 0.844107 4026.0  
micro avg 0.851563 0.851563 0.851563 4026.0  
weighted avg 0.851601 0.851796 0.851563 4026.0  
The result of Model Number:Dataset Number:Featuregroup Number:Rescale of 62 : 1 : 0 :  
0

f1-score precision recall support  
AFIB 0.634978 0.643724 0.626745 875.0  
GSVT 0.648840 0.646153 0.651725 691.0  
SB 0.691116 0.682055 0.700450 1553.0  
SR 0.669418 0.679415 0.660008 907.0  
macro avg 0.661088 0.662837 0.659732 4026.0  
micro avg 0.666957 0.666957 0.666957 4026.0  
weighted avg 0.666771 0.666967 0.666957 4026.0  
The result of Model Number:Dataset Number:Featuregroup Number:Rescale of 62 : 1 : 0 :  
1

f1-score precision recall support  
AFIB 0.685002 0.703885 0.667242 204.0  
GSVT 0.703232 0.690214 0.716817 300.0  
SB 0.714637 0.707956 0.721447 892.0  
SR 0.696674 0.706139 0.687471 681.0  
macro avg 0.699886 0.702048 0.698244 2077.0  
micro avg 0.704314 0.704314 0.704314 2077.0  
weighted avg 0.704189 0.704397 0.704314 2077.0  
The result of Model Number:Dataset Number:Featuregroup Number:Rescale of 62 : 1 : 1 :  
0

f1-score precision recall support  
AFIB 0.714886 0.721246 0.708675 875.0  
GSVT 0.729891 0.721881 0.738128 691.0  
SB 0.784994 0.778882 0.791209 1553.0  
SR 0.758907 0.769664 0.748450 907.0  
macro avg 0.747170 0.747919 0.746615 4026.0  
micro avg 0.754528 0.754528 0.754528 4026.0  
weighted avg 0.754422 0.754496 0.754528 4026.0

The result of Model Number:Dataset Number:Featuregroup Number:Rescale of 62 : 1 : 1 : 1

|              | f1-score | precision | recall   | support |
|--------------|----------|-----------|----------|---------|
| AFIB         | 0.737036 | 0.814968  | 0.673090 | 204.0   |
| GSVT         | 0.848056 | 0.838241  | 0.858266 | 300.0   |
| SB           | 0.896632 | 0.892945  | 0.900351 | 892.0   |
| SR           | 0.877376 | 0.864381  | 0.890778 | 681.0   |
| macro avg    | 0.839775 | 0.852634  | 0.830621 | 2077.0  |
| micro avg    | 0.868812 | 0.868812  | 0.868812 | 2077.0  |
| weighted avg | 0.867627 | 0.868019  | 0.868812 | 2077.0  |

The result of Model Number:Dataset Number:Featuregroup Number:Rescale of 62 : 1 : 2 : 0

|              | f1-score | precision | recall   | support |
|--------------|----------|-----------|----------|---------|
| AFIB         | 0.875299 | 0.898215  | 0.853924 | 204.0   |
| GSVT         | 0.823596 | 0.847533  | 0.801423 | 300.0   |
| SB           | 0.869070 | 0.838472  | 0.902002 | 892.0   |
| SR           | 0.787706 | 0.813359  | 0.763780 | 681.0   |
| macro avg    | 0.838918 | 0.849395  | 0.830282 | 2077.0  |
| micro avg    | 0.837433 | 0.837433  | 0.837433 | 2077.0  |
| weighted avg | 0.836437 | 0.837415  | 0.837433 | 2077.0  |

The result of Model Number:Dataset Number:Featuregroup Number:Rescale of 62 : 1 : 2 : 1

|              | f1-score | precision | recall   | support |
|--------------|----------|-----------|----------|---------|
| AFIB         | 0.679650 | 0.693964  | 0.666021 | 204.0   |
| GSVT         | 0.700781 | 0.694379  | 0.707319 | 300.0   |
| SB           | 0.712226 | 0.710638  | 0.713823 | 892.0   |
| SR           | 0.703762 | 0.704498  | 0.703036 | 681.0   |
| macro avg    | 0.699105 | 0.700870  | 0.697550 | 2077.0  |
| micro avg    | 0.704652 | 0.704652  | 0.704652 | 2077.0  |
| weighted avg | 0.704598 | 0.704639  | 0.704652 | 2077.0  |

The result of Model Number:Dataset Number:Featuregroup Number:Rescale of 62 : 1 : 3 : 0

|              | f1-score | precision | recall   | support |
|--------------|----------|-----------|----------|---------|
| AFIB         | 0.549768 | 0.598886  | 0.580567 | 204.0   |
| GSVT         | 0.746737 | 0.734530  | 0.759614 | 300.0   |
| SB           | 0.635704 | 0.630862  | 0.640668 | 892.0   |
| SR           | 0.777362 | 0.768567  | 0.786385 | 681.0   |
| macro avg    | 0.677393 | 0.683211  | 0.691808 | 2077.0  |
| micro avg    | 0.699723 | 0.699723  | 0.699723 | 2077.0  |
| weighted avg | 0.689747 | 0.687845  | 0.699723 | 2077.0  |

The result of Model Number:Dataset Number:Featuregroup Number:Rescale of 62 : 1 : 3 : 1

|      | f1-score | precision | recall   | support |
|------|----------|-----------|----------|---------|
| AFIB | 0.821817 | 0.841489  | 0.804246 | 204.0   |

GSVT 0.846017 0.834097 0.858637 300.0  
SB 0.867999 0.859181 0.877040 892.0  
SR 0.847253 0.859486 0.835430 681.0  
macro avg 0.845771 0.848563 0.843838 2077.0  
micro avg 0.853589 0.853589 0.853589 2077.0  
weighted avg 0.853486 0.853920 0.853589 2077.0  
The result of Model Number:Dataset Number:Featuregroup Number:Rescale of 62 : 1 : 4 :  
0

f1-score precision recall support  
AFIB 0.688829 0.691405 0.686564 875.0  
GSVT 0.704334 0.711129 0.697809 691.0  
SB 0.748927 0.741072 0.757008 1553.0  
SR 0.722993 0.729356 0.716988 907.0  
macro avg 0.716271 0.718240 0.714592 4026.0  
micro avg 0.722522 0.722522 0.722522 4026.0  
weighted avg 0.722369 0.722499 0.722522 4026.0  
The result of Model Number:Dataset Number:Featuregroup Number:Rescale of 62 : 1 : 4 :  
1

f1-score precision recall support  
AFIB 0.821368 0.825120 0.817696 875.0  
GSVT 0.835061 0.827999 0.842306 691.0  
SB 0.882677 0.873663 0.891883 1553.0  
SR 0.837121 0.854769 0.820233 907.0  
macro avg 0.844057 0.845388 0.843029 4026.0  
micro avg 0.851108 0.851108 0.851108 4026.0  
weighted avg 0.850917 0.851019 0.851108 4026.0  
The result of Model Number:Dataset Number:Featuregroup Number:Rescale of 62 : 1 : 5 :  
0

f1-score precision recall support  
AFIB 0.695820 0.697165 0.694534 875.0  
GSVT 0.674133 0.671171 0.677161 691.0  
SB 0.704388 0.661575 0.753145 1553.0  
SR 0.566934 0.656911 0.498770 907.0  
macro avg 0.660319 0.671706 0.655902 4026.0  
micro avg 0.670058 0.670058 0.670058 4026.0  
weighted avg 0.666367 0.669907 0.670058 4026.0  
The result of Model Number:Dataset Number:Featuregroup Number:Rescale of 62 : 1 : 5 :  
1

f1-score precision recall support  
AFIB 0.725716 0.708802 0.743575 875.0  
GSVT 0.696662 0.704320 0.689216 691.0  
SB 0.733125 0.685785 0.787504 1553.0  
SR 0.586753 0.704576 0.503003 907.0  
macro avg 0.685564 0.700871 0.680824 4026.0

micro avg 0.696993 0.696993 0.696993 4026.0  
weighted avg 0.692281 0.698202 0.696993 4026.0  
The result of Model Number:Dataset Number:Featuregroup Number:Rescale of 62 : 1 : 6 :  
0

|              | f1-score | precision | recall   | support |
|--------------|----------|-----------|----------|---------|
| AFIB         | 0.740048 | 0.745733  | 0.734618 | 204.0   |
| GSVT         | 0.766109 | 0.765375  | 0.766870 | 300.0   |
| SB           | 0.781783 | 0.779962  | 0.783620 | 892.0   |
| SR           | 0.774588 | 0.775632  | 0.773564 | 681.0   |
| macro avg    | 0.765632 | 0.766676  | 0.764668 | 2077.0  |
| micro avg    | 0.773091 | 0.773091  | 0.773091 | 2077.0  |
| weighted avg | 0.773061 | 0.773074  | 0.773091 | 2077.0  |

The result of Model Number:Dataset Number:Featuregroup Number:Rescale of 62 : 1 : 6 :  
1

|              | f1-score | precision | recall   | support |
|--------------|----------|-----------|----------|---------|
| AFIB         | 0.701421 | 0.756090  | 0.654450 | 204.0   |
| GSVT         | 0.722811 | 0.735046  | 0.711007 | 300.0   |
| SB           | 0.766043 | 0.758993  | 0.773250 | 892.0   |
| SR           | 0.735554 | 0.724888  | 0.746573 | 681.0   |
| macro avg    | 0.731457 | 0.743754  | 0.721320 | 2077.0  |
| micro avg    | 0.743844 | 0.743844  | 0.743844 | 2077.0  |
| weighted avg | 0.743455 | 0.744067  | 0.743844 | 2077.0  |

The result of Model Number:Dataset Number:Featuregroup Number:Rescale of 62 : 1 : 7 :  
0

|              | f1-score | precision | recall   | support |
|--------------|----------|-----------|----------|---------|
| AFIB         | 0.756625 | 0.735640  | 0.781225 | 875.0   |
| GSVT         | 0.766503 | 0.798789  | 0.741441 | 691.0   |
| SB           | 0.842030 | 0.841604  | 0.842467 | 1553.0  |
| SR           | 0.820906 | 0.826043  | 0.815838 | 907.0   |
| macro avg    | 0.796516 | 0.800519  | 0.795243 | 4026.0  |
| micro avg    | 0.805818 | 0.805818  | 0.805818 | 4026.0  |
| weighted avg | 0.805746 | 0.807720  | 0.805818 | 4026.0  |

The result of Model Number:Dataset Number:Featuregroup Number:Rescale of 62 : 1 : 7 :  
1

|              | f1-score | precision | recall   | support |
|--------------|----------|-----------|----------|---------|
| AFIB         | 0.671149 | 0.692948  | 0.650812 | 204.0   |
| GSVT         | 0.689679 | 0.680885  | 0.698842 | 300.0   |
| SB           | 0.709136 | 0.706462  | 0.711839 | 892.0   |
| SR           | 0.699218 | 0.700484  | 0.697984 | 681.0   |
| macro avg    | 0.692296 | 0.695195  | 0.689869 | 2077.0  |
| micro avg    | 0.699425 | 0.699425  | 0.699425 | 2077.0  |
| weighted avg | 0.699343 | 0.699481  | 0.699425 | 2077.0  |

The result of Model Number:Dataset Number:Featuregroup Number:Rescale of 62 : 1 : 8 :  
0

f1-score precision recall support  
AFIB 0.736534 0.747827 0.725698 204.0  
GSVT 0.753998 0.747601 0.760537 300.0  
SB 0.767114 0.764639 0.769608 892.0  
SR 0.759231 0.762050 0.756443 681.0  
macro avg 0.754219 0.755529 0.753072 2077.0  
micro avg 0.759669 0.759669 0.759669 2077.0  
weighted avg 0.759631 0.759678 0.759669 2077.0  
The result of Model Number:Dataset Number:Featuregroup Number:Rescale of 62 : 1 : 8 :  
1

f1-score precision recall support  
AFIB 0.768807 0.800905 0.739322 875.0  
GSVT 0.830580 0.826375 0.834929 691.0  
SB 0.910756 0.905631 0.915964 1553.0  
SR 0.852786 0.833849 0.872617 907.0  
macro avg 0.840732 0.841690 0.840708 4026.0  
micro avg 0.853899 0.853899 0.853899 4026.0  
weighted avg 0.853084 0.853096 0.853899 4026.0  
The result of Model Number:Dataset Number:Featuregroup Number:Rescale of 62 : 1 : 9 :  
0

f1-score precision recall support  
AFIB 0.641335 0.639363 0.643361 875.0  
GSVT 0.624987 0.628052 0.622051 691.0  
SB 0.657036 0.629770 0.686776 1553.0  
SR 0.565434 0.616921 0.521924 907.0  
macro avg 0.622198 0.628526 0.618528 4026.0  
micro avg 0.629092 0.629092 0.629092 4026.0  
weighted avg 0.627486 0.628665 0.629092 4026.0  
The result of Model Number:Dataset Number:Featuregroup Number:Rescale of 62 : 1 : 9 :  
1

f1-score precision recall support  
AFIB 0.750123 0.757045 0.743366 875.0  
GSVT 0.767638 0.765566 0.769749 691.0  
SB 0.817546 0.809861 0.825386 1553.0  
SR 0.794958 0.802934 0.787153 907.0  
macro avg 0.782566 0.783852 0.781413 4026.0  
micro avg 0.789397 0.789397 0.789397 4026.0  
weighted avg 0.789238 0.789219 0.789397 4026.0  
The result of Model Number:Dataset Number:Featuregroup Number:Rescale of 62 : 1 :  
10 : 0

f1-score precision recall support  
AFIB 0.710404 0.707515 0.713335 875.0  
GSVT 0.720788 0.725146 0.716511 691.0  
SB 0.760207 0.759281 0.761137 1553.0

SR 0.744348 0.745527 0.743194 907.0  
macro avg 0.733937 0.734367 0.733544 4026.0  
micro avg 0.739046 0.739046 0.739046 4026.0  
weighted avg 0.739044 0.739073 0.739046 4026.0  
The result of Model Number:Dataset Number:Featuregroup Number:Rescale of 62 : 1 : 10 : 1

f1-score precision recall support  
AFIB 0.754025 0.755568 0.752570 204.0  
GSVT 0.770609 0.767614 0.773682 300.0  
SB 0.787716 0.786665 0.788775 892.0  
SR 0.781931 0.784242 0.779635 681.0  
macro avg 0.773570 0.773522 0.773665 2077.0  
micro avg 0.780042 0.780042 0.780042 2077.0  
weighted avg 0.780039 0.780065 0.780042 2077.0

The result of Model Number:Dataset Number:Featuregroup Number:Rescale of 63 : 0 : 0 : 0

f1-score precision recall support  
AFIB 0.783256 0.777265 0.789444 875.0  
GSVT 0.801278 0.805659 0.796991 691.0  
SB 0.848488 0.847894 0.849090 1553.0  
SR 0.825951 0.829958 0.822026 907.0  
macro avg 0.814743 0.815194 0.814388 4026.0  
micro avg 0.821087 0.821087 0.821087 4026.0  
weighted avg 0.821131 0.821254 0.821087 4026.0

The result of Model Number:Dataset Number:Featuregroup Number:Rescale of 63 : 0 : 0 : 1

f1-score precision recall support  
AFIB 0.871892 0.899342 0.846280 204.0  
GSVT 0.828344 0.846037 0.811513 300.0  
SB 0.855283 0.825355 0.887495 892.0  
SR 0.781090 0.807488 0.756419 681.0  
macro avg 0.834152 0.844556 0.825427 2077.0  
micro avg 0.829496 0.829496 0.829496 2077.0  
weighted avg 0.828697 0.829751 0.829496 2077.0

The result of Model Number:Dataset Number:Featuregroup Number:Rescale of 63 : 0 : 1 : 0

f1-score precision recall support  
AFIB 0.838508 0.847446 0.829893 204.0  
GSVT 0.853928 0.849244 0.858759 300.0  
SB 0.873640 0.872183 0.875106 892.0  
SR 0.866357 0.867768 0.864962 681.0  
macro avg 0.858108 0.859160 0.857180 2077.0  
micro avg 0.864978 0.864978 0.864978 2077.0  
weighted avg 0.864954 0.864993 0.864978 2077.0

The result of Model Number:Dataset Number:Featuregroup Number:Rescale of 63 : 0 : 1 : 1

|              | f1-score | precision | recall   | support |
|--------------|----------|-----------|----------|---------|
| AFIB         | 0.593035 | 0.666815  | 0.534478 | 204.0   |
| GSVT         | 0.703592 | 0.688568  | 0.719318 | 300.0   |
| SB           | 0.751098 | 0.747269  | 0.754970 | 892.0   |
| SR           | 0.734248 | 0.724950  | 0.743835 | 681.0   |
| macro avg    | 0.695493 | 0.706901  | 0.688150 | 2077.0  |
| micro avg    | 0.724513 | 0.724513  | 0.724513 | 2077.0  |
| weighted avg | 0.723187 | 0.723570  | 0.724513 | 2077.0  |

The result of Model Number:Dataset Number:Featuregroup Number:Rescale of 63 : 0 : 2 : 0

|              | f1-score | precision | recall   | support |
|--------------|----------|-----------|----------|---------|
| AFIB         | 0.908335 | 0.929927  | 0.887823 | 204.0   |
| GSVT         | 0.931916 | 0.928320  | 0.935638 | 300.0   |
| SB           | 0.955009 | 0.952878  | 0.957150 | 892.0   |
| SR           | 0.942994 | 0.941097  | 0.944932 | 681.0   |
| macro avg    | 0.934563 | 0.938055  | 0.931386 | 2077.0  |
| micro avg    | 0.943228 | 0.943228  | 0.943228 | 2077.0  |
| weighted avg | 0.943150 | 0.943214  | 0.943228 | 2077.0  |

The result of Model Number:Dataset Number:Featuregroup Number:Rescale of 63 : 0 : 2 : 1

|              | f1-score | precision | recall   | support |
|--------------|----------|-----------|----------|---------|
| AFIB         | 0.910712 | 0.932361  | 0.890147 | 204.0   |
| GSVT         | 0.934355 | 0.930749  | 0.938087 | 300.0   |
| SB           | 0.957508 | 0.955372  | 0.959655 | 892.0   |
| SR           | 0.945462 | 0.943560  | 0.947405 | 681.0   |
| macro avg    | 0.937009 | 0.940510  | 0.933823 | 2077.0  |
| micro avg    | 0.945696 | 0.945696  | 0.945696 | 2077.0  |
| weighted avg | 0.945618 | 0.945682  | 0.945696 | 2077.0  |

The result of Model Number:Dataset Number:Featuregroup Number:Rescale of 63 : 0 : 3 : 0

|              | f1-score | precision | recall   | support |
|--------------|----------|-----------|----------|---------|
| AFIB         | 0.754887 | 0.761603  | 0.748328 | 875.0   |
| GSVT         | 0.770732 | 0.762274  | 0.779429 | 691.0   |
| SB           | 0.828918 | 0.822464  | 0.835481 | 1553.0  |
| SR           | 0.801371 | 0.812730  | 0.790329 | 907.0   |
| macro avg    | 0.788977 | 0.789768  | 0.788392 | 4026.0  |
| micro avg    | 0.796747 | 0.796747  | 0.796747 | 4026.0  |
| weighted avg | 0.796636 | 0.796713  | 0.796747 | 4026.0  |

The result of Model Number:Dataset Number:Featuregroup Number:Rescale of 63 : 0 : 3 : 1

|      | f1-score | precision | recall   | support |
|------|----------|-----------|----------|---------|
| AFIB | 0.895966 | 0.921181  | 0.872280 | 204.0   |



GSVT 0.919130 0.912679 0.925847 300.0  
SB 0.944406 0.940627 0.948217 892.0  
SR 0.931853 0.932436 0.931299 681.0  
macro avg 0.922839 0.926731 0.919411 2077.0  
micro avg 0.931980 0.931980 0.931980 2077.0  
weighted avg 0.931882 0.931994 0.931980 2077.0  
The result of Model Number:Dataset Number:Featuregroup Number:Rescale of 63 : 0 : 4 :  
0

f1-score precision recall support

AFIB 0.833649 0.841799 0.825851 875.0  
GSVT 0.827282 0.821005 0.833927 691.0  
SB 0.875358 0.866352 0.884631 1553.0  
SR 0.847573 0.861204 0.834606 907.0  
macro avg 0.845965 0.847590 0.844754 4026.0  
micro avg 0.851883 0.851883 0.851883 4026.0  
weighted avg 0.851782 0.852073 0.851883 4026.0

The result of Model Number:Dataset Number:Featuregroup Number:Rescale of 63 : 0 : 4 :  
1

f1-score precision recall support

AFIB 0.737910 0.815093 0.674297 204.0  
GSVT 0.868101 0.856639 0.879966 300.0  
SB 0.920617 0.917039 0.924229 892.0  
SR 0.898495 0.885690 0.911686 681.0  
macro avg 0.856281 0.868615 0.847544 2077.0  
micro avg 0.889175 0.889175 0.889175 2077.0  
weighted avg 0.887833 0.888023 0.889175 2077.0

The result of Model Number:Dataset Number:Featuregroup Number:Rescale of 63 : 0 : 5 :  
0

f1-score precision recall support

AFIB 0.669431 0.738240 0.612766 204.0  
GSVT 0.796603 0.785837 0.807746 300.0  
SB 0.848325 0.844933 0.851748 892.0  
SR 0.825300 0.814144 0.836802 681.0  
macro avg 0.784915 0.795789 0.777266 2077.0  
micro avg 0.817020 0.817020 0.817020 2077.0  
weighted avg 0.815734 0.815823 0.817020 2077.0

The result of Model Number:Dataset Number:Featuregroup Number:Rescale of 63 : 0 : 5 :  
1

f1-score precision recall support

AFIB 0.645784 0.647580 0.644031 875.0  
GSVT 0.660577 0.660393 0.660766 691.0  
SB 0.703535 0.696922 0.710282 1553.0  
SR 0.684893 0.694770 0.675301 907.0  
macro avg 0.673697 0.674916 0.672595 4026.0

micro avg 0.679504 0.679504 0.679504 4026.0  
weighted avg 0.679411 0.679444 0.679504 4026.0  
The result of Model Number:Dataset Number:Featuregroup Number:Rescale of 63 : 0 : 6 :  
0

|              | f1-score | precision | recall   | support |
|--------------|----------|-----------|----------|---------|
| AFIB         | 0.644081 | 0.702414  | 0.595767 | 204.0   |
| GSVT         | 0.747574 | 0.739032  | 0.756546 | 300.0   |
| SB           | 0.792758 | 0.790728  | 0.794801 | 892.0   |
| SR           | 0.773348 | 0.762875  | 0.784134 | 681.0   |
| macro avg    | 0.739440 | 0.748762  | 0.732812 | 2077.0  |
| micro avg    | 0.766229 | 0.766229  | 0.766229 | 2077.0  |
| weighted avg | 0.765264 | 0.765455  | 0.766229 | 2077.0  |

The result of Model Number:Dataset Number:Featuregroup Number:Rescale of 63 : 0 : 6 :  
1

|              | f1-score | precision | recall   | support |
|--------------|----------|-----------|----------|---------|
| AFIB         | 0.783901 | 0.785136  | 0.782773 | 204.0   |
| GSVT         | 0.802860 | 0.801607  | 0.804184 | 300.0   |
| SB           | 0.819422 | 0.818422  | 0.820430 | 892.0   |
| SR           | 0.813684 | 0.815245  | 0.812131 | 681.0   |
| macro avg    | 0.804967 | 0.805103  | 0.804880 | 2077.0  |
| micro avg    | 0.811664 | 0.811664  | 0.811664 | 2077.0  |
| weighted avg | 0.811660 | 0.811683  | 0.811664 | 2077.0  |

The result of Model Number:Dataset Number:Featuregroup Number:Rescale of 63 : 0 : 7 :  
0

|              | f1-score | precision | recall   | support |
|--------------|----------|-----------|----------|---------|
| AFIB         | 0.903211 | 0.916904  | 0.889943 | 204.0   |
| GSVT         | 0.917734 | 0.909998  | 0.925651 | 300.0   |
| SB           | 0.938091 | 0.935065  | 0.941139 | 892.0   |
| SR           | 0.928021 | 0.931468  | 0.924624 | 681.0   |
| macro avg    | 0.921764 | 0.923359  | 0.920339 | 2077.0  |
| micro avg    | 0.928459 | 0.928459  | 0.928459 | 2077.0  |
| weighted avg | 0.928423 | 0.928481  | 0.928459 | 2077.0  |

The result of Model Number:Dataset Number:Featuregroup Number:Rescale of 63 : 0 : 7 :  
1

|              | f1-score | precision | recall   | support |
|--------------|----------|-----------|----------|---------|
| AFIB         | 0.717773 | 0.727078  | 0.708895 | 204.0   |
| GSVT         | 0.745547 | 0.745065  | 0.746052 | 300.0   |
| SB           | 0.761256 | 0.759649  | 0.762876 | 892.0   |
| SR           | 0.753600 | 0.753171  | 0.754044 | 681.0   |
| macro avg    | 0.744544 | 0.746241  | 0.742967 | 2077.0  |
| micro avg    | 0.752248 | 0.752248  | 0.752248 | 2077.0  |
| weighted avg | 0.752206 | 0.752219  | 0.752248 | 2077.0  |

The result of Model Number:Dataset Number:Featuregroup Number:Rescale of 63 : 0 : 8 :  
0

f1-score precision recall support  
AFIB 0.834850 0.815879 0.854784 875.0  
GSVT 0.863462 0.877464 0.849970 691.0  
SB 0.921219 0.921225 0.921220 1553.0  
SR 0.897641 0.907868 0.887645 907.0  
macro avg 0.879293 0.880609 0.878405 4026.0  
micro avg 0.886988 0.886988 0.886988 4026.0  
weighted avg 0.887223 0.887809 0.886988 4026.0  
The result of Model Number:Dataset Number:Featuregroup Number:Rescale of 63 : 0 : 8 :  
1

f1-score precision recall support  
AFIB 0.831406 0.823612 0.839455 875.0  
GSVT 0.788253 0.769306 0.846198 691.0  
SB 0.911467 0.908120 0.914864 1553.0  
SR 0.708922 0.713894 0.704029 907.0  
macro avg 0.810012 0.803733 0.826137 4026.0  
micro avg 0.839191 0.839191 0.839191 4026.0  
weighted avg 0.827288 0.822171 0.839191 4026.0  
The result of Model Number:Dataset Number:Featuregroup Number:Rescale of 63 : 0 : 9 :  
0

f1-score precision recall support  
AFIB 0.735687 0.739883 0.731661 204.0  
GSVT 0.750825 0.745409 0.756327 300.0  
SB 0.765988 0.763191 0.768820 892.0  
SR 0.757842 0.762818 0.752950 681.0  
macro avg 0.752585 0.752825 0.752439 2077.0  
micro avg 0.758162 0.758162 0.758162 2077.0  
weighted avg 0.758151 0.758211 0.758162 2077.0  
The result of Model Number:Dataset Number:Featuregroup Number:Rescale of 63 : 0 : 9 :  
1

f1-score precision recall support  
AFIB 0.892329 0.894546 0.890184 875.0  
GSVT 0.907696 0.910423 0.905100 691.0  
SB 0.962902 0.956366 0.969534 1553.0  
SR 0.944579 0.951591 0.937706 907.0  
macro avg 0.926877 0.928231 0.925631 4026.0  
micro avg 0.934059 0.934059 0.934059 4026.0  
weighted avg 0.933961 0.933969 0.934059 4026.0  
The result of Model Number:Dataset Number:Featuregroup Number:Rescale of 63 : 0 :  
10 : 0

f1-score precision recall support  
AFIB 0.854645 0.842773 0.866937 875.0  
GSVT 0.885186 0.896995 0.873799 691.0  
SB 0.940355 0.938428 0.942293 1553.0

SR 0.915880 0.922957 0.908912 907.0  
macro avg 0.899016 0.900288 0.897985 4026.0  
micro avg 0.906639 0.906639 0.906639 4026.0  
weighted avg 0.906744 0.907042 0.906639 4026.0  
The result of Model Number:Dataset Number:Featuregroup Number:Rescale of 63 : 0 :  
10 : 1

f1-score precision recall support  
AFIB 0.783168 0.785863 0.780591 875.0  
GSVT 0.798037 0.782115 0.814764 691.0  
SB 0.844786 0.840217 0.849409 1553.0  
SR 0.812111 0.830994 0.794116 907.0  
macro avg 0.809526 0.809797 0.809720 4026.0  
micro avg 0.816049 0.816049 0.816049 4026.0  
weighted avg 0.816009 0.816354 0.816049 4026.0  
The result of Model Number:Dataset Number:Featuregroup Number:Rescale of 63 : 1 : 0 :  
0

f1-score precision recall support  
AFIB 0.845760 0.861282 0.831195 204.0  
GSVT 0.877866 0.870808 0.885201 300.0  
SB 0.894151 0.892555 0.895755 892.0  
SR 0.885297 0.886085 0.884515 681.0  
macro avg 0.875768 0.877682 0.874166 2077.0  
micro avg 0.884204 0.884204 0.884204 2077.0  
weighted avg 0.884143 0.884221 0.884204 2077.0  
The result of Model Number:Dataset Number:Featuregroup Number:Rescale of 63 : 1 : 0 :  
1

f1-score precision recall support  
AFIB 0.878711 0.881542 0.875981 875.0  
GSVT 0.891065 0.876918 0.905756 691.0  
SB 0.938882 0.931042 0.946861 1553.0  
SR 0.891687 0.914334 0.870168 907.0  
macro avg 0.900086 0.900959 0.899691 4026.0  
micro avg 0.907123 0.907123 0.907123 4026.0  
weighted avg 0.906965 0.907230 0.907123 4026.0  
The result of Model Number:Dataset Number:Featuregroup Number:Rescale of 63 : 1 : 1 :  
0

f1-score precision recall support  
AFIB 0.828902 0.845455 0.813111 204.0  
GSVT 0.838211 0.827737 0.849079 300.0  
SB 0.854213 0.846046 0.862542 892.0  
SR 0.838701 0.849703 0.828002 681.0  
macro avg 0.840007 0.842235 0.838184 2077.0  
micro avg 0.844418 0.844418 0.844418 2077.0  
weighted avg 0.844330 0.844542 0.844418 2077.0

The result of Model Number:Dataset Number:Featuregroup Number:Rescale of 63 : 1 : 1 :  
1

|              | f1-score | precision | recall   | support |
|--------------|----------|-----------|----------|---------|
| AFIB         | 0.771367 | 0.767505  | 0.775523 | 875.0   |
| GSVT         | 0.788796 | 0.789863  | 0.787891 | 691.0   |
| SB           | 0.839960 | 0.837194  | 0.842767 | 1553.0  |
| SR           | 0.815292 | 0.823754  | 0.807099 | 907.0   |
| macro avg    | 0.803854 | 0.804579  | 0.803320 | 4026.0  |
| micro avg    | 0.810698 | 0.810698  | 0.810698 | 4026.0  |
| weighted avg | 0.810713 | 0.810896  | 0.810698 | 4026.0  |

The result of Model Number:Dataset Number:Featuregroup Number:Rescale of 63 : 1 : 2 :  
0

|              | f1-score | precision | recall   | support |
|--------------|----------|-----------|----------|---------|
| AFIB         | 0.697758 | 0.691036  | 0.704720 | 875.0   |
| GSVT         | 0.716039 | 0.718087  | 0.714077 | 691.0   |
| SB           | 0.761273 | 0.759522  | 0.763037 | 1553.0  |
| SR           | 0.739858 | 0.748563  | 0.731368 | 907.0   |
| macro avg    | 0.728732 | 0.729302  | 0.728300 | 4026.0  |
| micro avg    | 0.734825 | 0.734825  | 0.734825 | 4026.0  |
| weighted avg | 0.734880 | 0.735057  | 0.734825 | 4026.0  |

The result of Model Number:Dataset Number:Featuregroup Number:Rescale of 63 : 1 : 2 :  
1

|              | f1-score | precision | recall   | support |
|--------------|----------|-----------|----------|---------|
| AFIB         | 0.879375 | 0.900771  | 0.859188 | 204.0   |
| GSVT         | 0.890429 | 0.878171  | 0.903153 | 300.0   |
| SB           | 0.908408 | 0.899337  | 0.917671 | 892.0   |
| SR           | 0.892548 | 0.904261  | 0.881160 | 681.0   |
| macro avg    | 0.892690 | 0.895635  | 0.890293 | 2077.0  |
| micro avg    | 0.897859 | 0.897859  | 0.897859 | 2077.0  |
| weighted avg | 0.897760 | 0.898035  | 0.897859 | 2077.0  |

The result of Model Number:Dataset Number:Featuregroup Number:Rescale of 63 : 1 : 3 :  
0

|              | f1-score | precision | recall   | support |
|--------------|----------|-----------|----------|---------|
| AFIB         | 0.652366 | 0.680996  | 0.626210 | 204.0   |
| GSVT         | 0.607310 | 0.611683  | 0.603249 | 300.0   |
| SB           | 0.629828 | 0.598200  | 0.664990 | 892.0   |
| SR           | 0.558756 | 0.595648  | 0.526286 | 681.0   |
| macro avg    | 0.612065 | 0.621632  | 0.605184 | 2077.0  |
| micro avg    | 0.606785 | 0.606785  | 0.606785 | 2077.0  |
| weighted avg | 0.605487 | 0.607443  | 0.606785 | 2077.0  |

The result of Model Number:Dataset Number:Featuregroup Number:Rescale of 63 : 1 : 3 :  
1

|      | f1-score | precision | recall   | support |
|------|----------|-----------|----------|---------|
| AFIB | 0.742611 | 0.766735  | 0.720100 | 204.0   |

GSVT 0.756689 0.749916 0.763736 300.0  
SB 0.774682 0.769372 0.780067 892.0  
SR 0.762048 0.765263 0.758905 681.0  
macro avg 0.759008 0.762821 0.755702 2077.0  
micro avg 0.764880 0.764880 0.764880 2077.0  
weighted avg 0.764791 0.764956 0.764880 2077.0  
The result of Model Number:Dataset Number:Featuregroup Number:Rescale of 63 : 1 : 4 :  
0

f1-score precision recall support  
AFIB 0.670994 0.687056 0.656648 204.0  
GSVT 0.690753 0.681020 0.701057 300.0  
SB 0.708701 0.701501 0.716083 892.0  
SR 0.691762 0.701750 0.682109 681.0  
macro avg 0.690552 0.692832 0.688974 2077.0  
micro avg 0.696936 0.696936 0.696936 2077.0  
weighted avg 0.696851 0.697206 0.696936 2077.0  
The result of Model Number:Dataset Number:Featuregroup Number:Rescale of 63 : 1 : 4 :  
1

f1-score precision recall support  
AFIB 0.701085 0.705992 0.696272 204.0  
GSVT 0.717397 0.713860 0.720980 300.0  
SB 0.731655 0.730438 0.732886 892.0  
SR 0.724374 0.726093 0.722671 681.0  
macro avg 0.718628 0.719096 0.718202 2077.0  
micro avg 0.724221 0.724221 0.724221 2077.0  
weighted avg 0.724206 0.724218 0.724221 2077.0  
The result of Model Number:Dataset Number:Featuregroup Number:Rescale of 63 : 1 : 5 :  
0

f1-score precision recall support  
AFIB 0.738803 0.730048 0.747832 875.0  
GSVT 0.749318 0.756562 0.742285 691.0  
SB 0.795276 0.792233 0.798348 1553.0  
SR 0.776735 0.785696 0.767998 907.0  
macro avg 0.765033 0.766135 0.764116 4026.0  
micro avg 0.770909 0.770909 0.770909 4026.0  
weighted avg 0.770937 0.771123 0.770909 4026.0  
The result of Model Number:Dataset Number:Featuregroup Number:Rescale of 63 : 1 : 5 :  
1

f1-score precision recall support  
AFIB 0.662741 0.666379 0.659186 875.0  
GSVT 0.663668 0.655278 0.672381 691.0  
SB 0.697962 0.695161 0.700792 1553.0  
SR 0.682979 0.691270 0.674927 907.0  
macro avg 0.676838 0.677022 0.676821 4026.0

micro avg 0.681046 0.681046 0.681046 4026.0  
weighted avg 0.681046 0.681184 0.681046 4026.0  
The result of Model Number:Dataset Number:Featuregroup Number:Rescale of 63 : 1 : 6 :  
0

|              | f1-score | precision | recall   | support |
|--------------|----------|-----------|----------|---------|
| AFIB         | 0.657087 | 0.689917  | 0.627569 | 204.0   |
| GSVT         | 0.676897 | 0.664352  | 0.690159 | 300.0   |
| SB           | 0.692387 | 0.685408  | 0.699525 | 892.0   |
| SR           | 0.673185 | 0.679198  | 0.667338 | 681.0   |
| macro avg    | 0.674889 | 0.679719  | 0.671148 | 2077.0  |
| micro avg    | 0.680551 | 0.680551  | 0.680551 | 2077.0  |
| weighted avg | 0.680386 | 0.680773  | 0.680551 | 2077.0  |

The result of Model Number:Dataset Number:Featuregroup Number:Rescale of 63 : 1 : 6 :  
1

|              | f1-score | precision | recall   | support |
|--------------|----------|-----------|----------|---------|
| AFIB         | 0.603031 | 0.587600  | 0.619351 | 875.0   |
| GSVT         | 0.570051 | 0.602359  | 0.541164 | 691.0   |
| SB           | 0.604453 | 0.556242  | 0.661829 | 1553.0  |
| SR           | 0.482856 | 0.586492  | 0.410433 | 907.0   |
| macro avg    | 0.565098 | 0.583173  | 0.558194 | 4026.0  |
| micro avg    | 0.575251 | 0.575251  | 0.575251 | 4026.0  |
| weighted avg | 0.570845 | 0.577787  | 0.575251 | 4026.0  |

The result of Model Number:Dataset Number:Featuregroup Number:Rescale of 63 : 1 : 7 :  
0

|              | f1-score | precision | recall   | support |
|--------------|----------|-----------|----------|---------|
| AFIB         | 0.794419 | 0.782545  | 0.806688 | 875.0   |
| GSVT         | 0.809650 | 0.816574  | 0.802855 | 691.0   |
| SB           | 0.865093 | 0.862114  | 0.868098 | 1553.0  |
| SR           | 0.839772 | 0.852297  | 0.827638 | 907.0   |
| macro avg    | 0.827233 | 0.828383  | 0.826320 | 4026.0  |
| micro avg    | 0.834438 | 0.834438  | 0.834438 | 4026.0  |
| weighted avg | 0.834512 | 0.834793  | 0.834438 | 4026.0  |

The result of Model Number:Dataset Number:Featuregroup Number:Rescale of 63 : 1 : 7 :  
1

|              | f1-score | precision | recall   | support |
|--------------|----------|-----------|----------|---------|
| AFIB         | 0.704999 | 0.712833  | 0.697698 | 204.0   |
| GSVT         | 0.726837 | 0.722700  | 0.731234 | 300.0   |
| SB           | 0.741297 | 0.740303  | 0.742294 | 892.0   |
| SR           | 0.734991 | 0.735975  | 0.734018 | 681.0   |
| macro avg    | 0.727031 | 0.727953  | 0.726311 | 2077.0  |
| micro avg    | 0.733603 | 0.733603  | 0.733603 | 2077.0  |
| weighted avg | 0.733575 | 0.733644  | 0.733603 | 2077.0  |

The result of Model Number:Dataset Number:Featuregroup Number:Rescale of 63 : 1 : 8 :  
0

f1-score precision recall support  
AFIB 0.680418 0.701053 0.660992 875.0  
GSVT 0.726356 0.721319 0.731503 691.0  
SB 0.794722 0.791682 0.797791 1553.0  
SR 0.751616 0.740335 0.763290 907.0  
macro avg 0.738278 0.738597 0.738394 4026.0  
micro avg 0.748910 0.748910 0.748910 4026.0  
weighted avg 0.748434 0.748340 0.748910 4026.0  
The result of Model Number:Dataset Number:Featuregroup Number:Rescale of 63 : 1 : 8 :  
1

f1-score precision recall support  
AFIB 0.811632 0.813890 0.809429 875.0  
GSVT 0.830224 0.829994 0.830463 691.0  
SB 0.884215 0.875904 0.892695 1553.0  
SR 0.860786 0.873199 0.848731 907.0  
macro avg 0.846714 0.848247 0.845329 4026.0  
micro avg 0.854013 0.854013 0.854013 4026.0  
weighted avg 0.853895 0.853937 0.854013 4026.0  
The result of Model Number:Dataset Number:Featuregroup Number:Rescale of 63 : 1 : 9 :  
0

f1-score precision recall support  
AFIB 0.856725 0.848693 0.865019 875.0  
GSVT 0.812257 0.792734 0.871968 691.0  
SB 0.939224 0.935775 0.942725 1553.0  
SR 0.730511 0.735634 0.725469 907.0  
macro avg 0.834679 0.828209 0.851295 4026.0  
micro avg 0.864747 0.864747 0.864747 4026.0  
weighted avg 0.852482 0.847209 0.864747 4026.0  
The result of Model Number:Dataset Number:Featuregroup Number:Rescale of 63 : 1 : 9 :  
1

f1-score precision recall support  
AFIB 0.773954 0.784910 0.763935 204.0  
GSVT 0.790023 0.775477 0.805270 300.0  
SB 0.806861 0.797940 0.815997 892.0  
SR 0.789904 0.805992 0.774493 681.0  
macro avg 0.790185 0.791080 0.789924 2077.0  
micro avg 0.795726 0.795726 0.795726 2077.0  
weighted avg 0.795637 0.796056 0.795726 2077.0  
The result of Model Number:Dataset Number:Featuregroup Number:Rescale of 63 : 1 :  
10 : 0

f1-score precision recall support  
AFIB 0.797797 0.806288 0.789924 204.0  
GSVT 0.821243 0.815771 0.827029 300.0  
SB 0.838597 0.837848 0.839349 892.0



SR 0.831526 0.832636 0.830425 681.0  
macro avg 0.822291 0.823136 0.821682 2077.0  
micro avg 0.829789 0.829789 0.829789 2077.0  
weighted avg 0.829765 0.829850 0.829789 2077.0  
The result of Model Number:Dataset Number:Featuregroup Number:Rescale of 63 : 1 :

10 : 1

f1-score precision recall support

AFIB 0.726914 0.734663 0.719446 204.0  
GSVT 0.740283 0.736222 0.744471 300.0  
SB 0.757371 0.756108 0.758642 892.0  
SR 0.751057 0.752281 0.749847 681.0  
macro avg 0.743906 0.744818 0.743102 2077.0  
micro avg 0.749862 0.749862 0.749862 2077.0  
weighted avg 0.749841 0.749875 0.749862 2077.0

The result of Model Number:Dataset Number:Featuregroup Number:Rescale of 64 : 0 : 0 : 0

f1-score precision recall support

AFIB 0.767340 0.774336 0.760571 204.0  
GSVT 0.787365 0.784787 0.789985 300.0  
SB 0.801759 0.801224 0.802297 892.0  
SR 0.794708 0.794479 0.794948 681.0  
macro avg 0.787793 0.788707 0.786950 2077.0  
micro avg 0.794011 0.794011 0.794011 2077.0  
weighted avg 0.793988 0.793998 0.794011 2077.0

The result of Model Number:Dataset Number:Featuregroup Number:Rescale of 64 : 0 : 0 : 1

f1-score precision recall support

AFIB 0.828941 0.812428 0.846182 875.0  
GSVT 0.674685 0.627421 0.845698 691.0  
SB 0.547432 0.548375 0.546492 1553.0  
SR 0.887457 0.895272 0.879815 907.0  
macro avg 0.734629 0.720874 0.779547 4026.0  
micro avg 0.738073 0.738073 0.738073 4026.0  
weighted avg 0.707058 0.697481 0.738073 4026.0

The result of Model Number:Dataset Number:Featuregroup Number:Rescale of 64 : 0 : 1 : 0

f1-score precision recall support

AFIB 0.707247 0.706610 0.707954 875.0  
GSVT 0.719500 0.712912 0.726267 691.0  
SB 0.755029 0.748391 0.761787 1553.0  
SR 0.719483 0.737270 0.702597 907.0  
macro avg 0.725315 0.726296 0.724651 4026.0  
micro avg 0.730656 0.730656 0.730656 4026.0  
weighted avg 0.730538 0.730716 0.730656 4026.0

The result of Model Number:Dataset Number:Featuregroup Number:Rescale of 64 : 0 : 1 : 1

|              | f1-score | precision | recall   | support |
|--------------|----------|-----------|----------|---------|
| AFIB         | 0.724870 | 0.722640  | 0.727159 | 875.0   |
| GSVT         | 0.706392 | 0.709856  | 0.703074 | 691.0   |
| SB           | 0.742616 | 0.711799  | 0.776229 | 1553.0  |
| SR           | 0.639083 | 0.697275  | 0.589905 | 907.0   |
| macro avg    | 0.703240 | 0.710393  | 0.699092 | 4026.0  |
| micro avg    | 0.711032 | 0.711032  | 0.711032 | 4026.0  |
| weighted avg | 0.709217 | 0.710550  | 0.711032 | 4026.0  |

The result of Model Number:Dataset Number:Featuregroup Number:Rescale of 64 : 0 : 2 : 0

|              | f1-score | precision | recall   | support |
|--------------|----------|-----------|----------|---------|
| AFIB         | 0.708577 | 0.717277  | 0.700195 | 204.0   |
| GSVT         | 0.722849 | 0.719761  | 0.725980 | 300.0   |
| SB           | 0.731599 | 0.729403  | 0.733811 | 892.0   |
| SR           | 0.725441 | 0.727167  | 0.723746 | 681.0   |
| macro avg    | 0.722116 | 0.723402  | 0.720933 | 2077.0  |
| micro avg    | 0.726078 | 0.726078  | 0.726078 | 2077.0  |
| weighted avg | 0.726055 | 0.726086  | 0.726078 | 2077.0  |

The result of Model Number:Dataset Number:Featuregroup Number:Rescale of 64 : 0 : 2 : 1

|              | f1-score | precision | recall   | support |
|--------------|----------|-----------|----------|---------|
| AFIB         | 0.876484 | 0.897304  | 0.856688 | 204.0   |
| GSVT         | 0.905274 | 0.896786  | 0.914019 | 300.0   |
| SB           | 0.924715 | 0.923681  | 0.925752 | 892.0   |
| SR           | 0.915790 | 0.914870  | 0.916727 | 681.0   |
| macro avg    | 0.905566 | 0.908160  | 0.903297 | 2077.0  |
| micro avg    | 0.914315 | 0.914315  | 0.914315 | 2077.0  |
| weighted avg | 0.914244 | 0.914317  | 0.914315 | 2077.0  |

The result of Model Number:Dataset Number:Featuregroup Number:Rescale of 64 : 0 : 3 : 0

|              | f1-score | precision | recall   | support |
|--------------|----------|-----------|----------|---------|
| AFIB         | 0.812230 | 0.818788  | 0.805847 | 204.0   |
| GSVT         | 0.830868 | 0.826794  | 0.835011 | 300.0   |
| SB           | 0.847084 | 0.846144  | 0.848033 | 892.0   |
| SR           | 0.840758 | 0.841876  | 0.839649 | 681.0   |
| macro avg    | 0.832735 | 0.833400  | 0.832135 | 2077.0  |
| micro avg    | 0.839260 | 0.839260  | 0.839260 | 2077.0  |
| weighted avg | 0.839244 | 0.839263  | 0.839260 | 2077.0  |

The result of Model Number:Dataset Number:Featuregroup Number:Rescale of 64 : 0 : 3 : 1

|      | f1-score | precision | recall   | support |
|------|----------|-----------|----------|---------|
| AFIB | 0.849804 | 0.841617  | 0.858283 | 875.0   |

GSVT 0.872069 0.874563 0.869679 691.0  
SB 0.927159 0.925027 0.929308 1553.0  
SR 0.901078 0.911680 0.890738 907.0  
macro avg 0.887527 0.888222 0.887002 4026.0  
micro avg 0.894948 0.894948 0.894948 4026.0  
weighted avg 0.895016 0.895231 0.894948 4026.0  
The result of Model Number:Dataset Number:Featuregroup Number:Rescale of 64 : 0 : 4 :  
0

f1-score precision recall support

AFIB 0.674356 0.673739 0.675056 875.0  
GSVT 0.688179 0.686844 0.689591 691.0  
SB 0.730247 0.728621 0.731892 1553.0  
SR 0.710316 0.714950 0.705767 907.0  
macro avg 0.700774 0.701038 0.700576 4026.0  
micro avg 0.706394 0.706394 0.706394 4026.0  
weighted avg 0.706389 0.706443 0.706394 4026.0  
The result of Model Number:Dataset Number:Featuregroup Number:Rescale of 64 : 0 : 4 :  
1

f1-score precision recall support

AFIB 0.807291 0.805725 0.808966 875.0  
GSVT 0.822450 0.808060 0.837441 691.0  
SB 0.881076 0.868575 0.893952 1553.0  
SR 0.834611 0.871817 0.800487 907.0  
macro avg 0.836357 0.838544 0.835211 4026.0  
micro avg 0.844726 0.844726 0.844726 4026.0  
weighted avg 0.844510 0.845259 0.844726 4026.0  
The result of Model Number:Dataset Number:Featuregroup Number:Rescale of 64 : 0 : 5 :  
0

f1-score precision recall support

AFIB 0.854941 0.862831 0.847241 875.0  
GSVT 0.874905 0.872543 0.877310 691.0  
SB 0.931786 0.923027 0.940721 1553.0  
SR 0.906041 0.915132 0.897147 907.0  
macro avg 0.891918 0.893383 0.890605 4026.0  
micro avg 0.899704 0.899704 0.899704 4026.0  
weighted avg 0.899522 0.899501 0.899704 4026.0  
The result of Model Number:Dataset Number:Featuregroup Number:Rescale of 64 : 0 : 5 :  
1

f1-score precision recall support

AFIB 0.768283 0.811988 0.729552 204.0  
GSVT 0.811902 0.802961 0.821085 300.0  
SB 0.823979 0.815780 0.832372 892.0  
SR 0.814407 0.817191 0.811770 681.0  
macro avg 0.804643 0.811980 0.798695 2077.0

micro avg 0.813888 0.813888 0.813888 2077.0  
weighted avg 0.813626 0.814019 0.813888 2077.0  
The result of Model Number:Dataset Number:Featuregroup Number:Rescale of 64 : 0 : 6 :  
0

|              | f1-score | precision | recall   | support |
|--------------|----------|-----------|----------|---------|
| AFIB         | 0.650129 | 0.651858  | 0.648448 | 875.0   |
| GSVT         | 0.662631 | 0.657963  | 0.667405 | 691.0   |
| SB           | 0.700479 | 0.693337  | 0.707784 | 1553.0  |
| SR           | 0.668459 | 0.683019  | 0.654531 | 907.0   |
| macro avg    | 0.670424 | 0.671544  | 0.669542 | 4026.0  |
| micro avg    | 0.675960 | 0.675960  | 0.675960 | 4026.0  |
| weighted avg | 0.675826 | 0.675926  | 0.675960 | 4026.0  |

The result of Model Number:Dataset Number:Featuregroup Number:Rescale of 64 : 0 : 6 :  
1

|              | f1-score | precision | recall   | support |
|--------------|----------|-----------|----------|---------|
| AFIB         | 0.714348 | 0.754985  | 0.678335 | 204.0   |
| GSVT         | 0.754904 | 0.746591  | 0.763443 | 300.0   |
| SB           | 0.766134 | 0.758511  | 0.773938 | 892.0   |
| SR           | 0.757234 | 0.759822  | 0.754782 | 681.0   |
| macro avg    | 0.748155 | 0.754977  | 0.742625 | 2077.0  |
| micro avg    | 0.756751 | 0.756751  | 0.756751 | 2077.0  |
| weighted avg | 0.756507 | 0.756873  | 0.756751 | 2077.0  |

The result of Model Number:Dataset Number:Featuregroup Number:Rescale of 64 : 0 : 7 :  
0

|              | f1-score | precision | recall   | support |
|--------------|----------|-----------|----------|---------|
| AFIB         | 0.675149 | 0.685068  | 0.665576 | 204.0   |
| GSVT         | 0.692256 | 0.686370  | 0.698257 | 300.0   |
| SB           | 0.704220 | 0.701402  | 0.707062 | 892.0   |
| SR           | 0.697255 | 0.700677  | 0.693874 | 681.0   |
| macro avg    | 0.692220 | 0.693380  | 0.691192 | 2077.0  |
| micro avg    | 0.697391 | 0.697391  | 0.697391 | 2077.0  |
| weighted avg | 0.697353 | 0.697389  | 0.697391 | 2077.0  |

The result of Model Number:Dataset Number:Featuregroup Number:Rescale of 64 : 0 : 7 :  
1

|              | f1-score | precision | recall   | support |
|--------------|----------|-----------|----------|---------|
| AFIB         | 0.709180 | 0.699110  | 0.719623 | 875.0   |
| GSVT         | 0.734899 | 0.744274  | 0.725868 | 691.0   |
| SB           | 0.780995 | 0.779849  | 0.782152 | 1553.0  |
| SR           | 0.761538 | 0.767250  | 0.755912 | 907.0   |
| macro avg    | 0.746653 | 0.747621  | 0.745889 | 4026.0  |
| micro avg    | 0.752990 | 0.752990  | 0.752990 | 4026.0  |
| weighted avg | 0.753092 | 0.753357  | 0.752990 | 4026.0  |

The result of Model Number:Dataset Number:Featuregroup Number:Rescale of 64 : 0 : 8 :  
0

f1-score precision recall support  
AFIB 0.867524 0.855327 0.880116 875.0  
GSVT 0.886202 0.892851 0.879674 691.0  
SB 0.942374 0.939604 0.945163 1553.0  
SR 0.919161 0.931877 0.906802 907.0  
macro avg 0.903815 0.904915 0.902939 4026.0  
micro avg 0.911144 0.911144 0.911144 4026.0  
weighted avg 0.911235 0.911522 0.911144 4026.0  
The result of Model Number:Dataset Number:Featuregroup Number:Rescale of 64 : 0 : 8 :  
1

f1-score precision recall support  
AFIB 0.821242 0.822621 0.841597 204.0  
GSVT 0.813522 0.845091 0.785275 300.0  
SB 0.862916 0.815593 0.916423 892.0  
SR 0.747964 0.816991 0.691587 681.0  
macro avg 0.811411 0.825074 0.808720 2077.0  
micro avg 0.816412 0.816412 0.816412 2077.0  
weighted avg 0.813999 0.821002 0.816412 2077.0  
The result of Model Number:Dataset Number:Featuregroup Number:Rescale of 64 : 0 : 9 :  
0

f1-score precision recall support  
AFIB 0.719696 0.716769 0.722665 875.0  
GSVT 0.730216 0.734630 0.725882 691.0  
SB 0.770150 0.769212 0.771092 1553.0  
SR 0.754083 0.755278 0.752914 907.0  
macro avg 0.743536 0.743972 0.743138 4026.0  
micro avg 0.748712 0.748712 0.748712 4026.0  
weighted avg 0.748711 0.748740 0.748712 4026.0  
The result of Model Number:Dataset Number:Featuregroup Number:Rescale of 64 : 0 : 9 :  
1

f1-score precision recall support  
AFIB 0.896737 0.941542 0.856454 204.0  
GSVT 0.923772 0.906652 0.941872 300.0  
SB 0.944912 0.935387 0.954653 892.0  
SR 0.918706 0.926912 0.910727 681.0  
macro avg 0.921032 0.927623 0.915926 2077.0  
micro avg 0.928760 0.928760 0.928760 2077.0  
weighted avg 0.928535 0.929063 0.928760 2077.0  
The result of Model Number:Dataset Number:Featuregroup Number:Rescale of 64 : 0 :  
10 : 0

f1-score precision recall support  
AFIB 0.698515 0.702499 0.694692 204.0  
GSVT 0.712888 0.707746 0.718112 300.0  
SB 0.727285 0.724629 0.729974 892.0

SR 0.719550 0.724275 0.714905 681.0  
macro avg 0.714559 0.714787 0.714421 2077.0  
micro avg 0.719855 0.719855 0.719855 2077.0  
weighted avg 0.719844 0.719901 0.719855 2077.0  
The result of Model Number:Dataset Number:Featuregroup Number:Rescale of 64 : 0 :  
10 : 1

f1-score precision recall support  
AFIB 0.841504 0.842450 0.840712 204.0  
GSVT 0.860824 0.858902 0.862820 300.0  
SB 0.879070 0.877896 0.880251 892.0  
SR 0.872486 0.874683 0.870311 681.0  
macro avg 0.863471 0.863483 0.863524 2077.0  
micro avg 0.870591 0.870591 0.870591 2077.0  
weighted avg 0.870586 0.870618 0.870591 2077.0  
The result of Model Number:Dataset Number:Featuregroup Number:Rescale of 64 : 1 : 0 :  
0

f1-score precision recall support  
AFIB 0.768186 0.802328 0.736938 204.0  
GSVT 0.800198 0.793916 0.806598 300.0  
SB 0.812421 0.806154 0.818794 892.0  
SR 0.803433 0.804760 0.802139 681.0  
macro avg 0.796060 0.801789 0.791117 2077.0  
micro avg 0.803532 0.803532 0.803532 2077.0  
weighted avg 0.803364 0.803554 0.803532 2077.0  
The result of Model Number:Dataset Number:Featuregroup Number:Rescale of 64 : 1 : 0 :  
1

f1-score precision recall support  
AFIB 0.739292 0.824541 0.670117 204.0  
GSVT 0.871701 0.856529 0.887606 300.0  
SB 0.930707 0.926582 0.934879 892.0  
SR 0.909109 0.896679 0.921917 681.0  
macro avg 0.862702 0.876083 0.853630 2077.0  
micro avg 0.897796 0.897796 0.897796 2077.0  
weighted avg 0.896303 0.896637 0.897796 2077.0  
The result of Model Number:Dataset Number:Featuregroup Number:Rescale of 64 : 1 : 1 :  
0

f1-score precision recall support  
AFIB 0.703350 0.790855 0.633901 204.0  
GSVT 0.834474 0.816655 0.853125 300.0  
SB 0.890816 0.886275 0.895409 892.0  
SR 0.870832 0.859804 0.882202 681.0  
macro avg 0.824868 0.838397 0.816159 2077.0  
micro avg 0.859286 0.859286 0.859286 2077.0  
weighted avg 0.857713 0.858168 0.859286 2077.0

The result of Model Number:Dataset Number:Featuregroup Number:Rescale of 64 : 1 : 1 : 1

|              | f1-score | precision | recall   | support |
|--------------|----------|-----------|----------|---------|
| AFIB         | 0.832804 | 0.846327  | 0.819750 | 875.0   |
| GSVT         | 0.885711 | 0.888487  | 0.883006 | 691.0   |
| SB           | 0.963609 | 0.960288  | 0.966958 | 1553.0  |
| SR           | 0.912257 | 0.902096  | 0.922705 | 907.0   |
| macro avg    | 0.898595 | 0.899300  | 0.898105 | 4026.0  |
| micro avg    | 0.910585 | 0.910585  | 0.910585 | 4026.0  |
| weighted avg | 0.910241 | 0.910087  | 0.910585 | 4026.0  |

The result of Model Number:Dataset Number:Featuregroup Number:Rescale of 64 : 1 : 2 : 0

|              | f1-score | precision | recall   | support |
|--------------|----------|-----------|----------|---------|
| AFIB         | 0.887501 | 0.896575  | 0.878683 | 875.0   |
| GSVT         | 0.887234 | 0.873527  | 0.901482 | 691.0   |
| SB           | 0.935913 | 0.930325  | 0.941577 | 1553.0  |
| SR           | 0.911141 | 0.923336  | 0.899291 | 907.0   |
| macro avg    | 0.905447 | 0.905941  | 0.905258 | 4026.0  |
| micro avg    | 0.911500 | 0.911500  | 0.911500 | 4026.0  |
| weighted avg | 0.911456 | 0.911667  | 0.911500 | 4026.0  |

The result of Model Number:Dataset Number:Featuregroup Number:Rescale of 64 : 1 : 2 : 1

|              | f1-score | precision | recall   | support |
|--------------|----------|-----------|----------|---------|
| AFIB         | 0.690641 | 0.692760  | 0.688643 | 204.0   |
| GSVT         | 0.708783 | 0.706982  | 0.710657 | 300.0   |
| SB           | 0.724617 | 0.723731  | 0.725508 | 892.0   |
| SR           | 0.718686 | 0.720068  | 0.717315 | 681.0   |
| macro avg    | 0.710682 | 0.710885  | 0.710531 | 2077.0  |
| micro avg    | 0.717056 | 0.717056  | 0.717056 | 2077.0  |
| weighted avg | 0.717048 | 0.717069  | 0.717056 | 2077.0  |

The result of Model Number:Dataset Number:Featuregroup Number:Rescale of 64 : 1 : 3 : 0

|              | f1-score | precision | recall   | support |
|--------------|----------|-----------|----------|---------|
| AFIB         | 0.826154 | 0.820571  | 0.831926 | 875.0   |
| GSVT         | 0.846310 | 0.846647  | 0.846082 | 691.0   |
| SB           | 0.899032 | 0.896737  | 0.901347 | 1553.0  |
| SR           | 0.874552 | 0.884323  | 0.865006 | 907.0   |
| macro avg    | 0.861512 | 0.862069  | 0.861090 | 4026.0  |
| micro avg    | 0.868587 | 0.868587  | 0.868587 | 4026.0  |
| weighted avg | 0.868629 | 0.868789  | 0.868587 | 4026.0  |

The result of Model Number:Dataset Number:Featuregroup Number:Rescale of 64 : 1 : 3 : 1

|      | f1-score | precision | recall   | support |
|------|----------|-----------|----------|---------|
| AFIB | 0.779461 | 0.789565  | 0.769819 | 204.0   |

GSVT 0.809621 0.809098 0.810169 300.0  
SB 0.826680 0.824935 0.828439 892.0  
SR 0.818366 0.817901 0.818849 681.0  
macro avg 0.808532 0.810375 0.806819 2077.0  
micro avg 0.816898 0.816898 0.816898 2077.0  
weighted avg 0.816852 0.816867 0.816898 2077.0  
The result of Model Number:Dataset Number:Featuregroup Number:Rescale of 64 : 1 : 4 :  
0

f1-score precision recall support  
AFIB 0.735312 0.753623 0.717906 875.0  
GSVT 0.776910 0.780209 0.773672 691.0  
SB 0.842700 0.839476 0.845955 1553.0  
SR 0.801593 0.786656 0.817151 907.0  
macro avg 0.789129 0.789991 0.788671 4026.0  
micro avg 0.799230 0.799230 0.799230 4026.0  
weighted avg 0.798808 0.798745 0.799230 4026.0  
The result of Model Number:Dataset Number:Featuregroup Number:Rescale of 64 : 1 : 4 :  
1

f1-score precision recall support  
AFIB 0.822257 0.848613 0.797734 204.0  
GSVT 0.846856 0.832287 0.862070 300.0  
SB 0.861506 0.852989 0.870196 892.0  
SR 0.838471 0.848963 0.828253 681.0  
macro avg 0.842272 0.845713 0.839563 2077.0  
micro avg 0.848153 0.848153 0.848153 2077.0  
weighted avg 0.847982 0.848249 0.848153 2077.0  
The result of Model Number:Dataset Number:Featuregroup Number:Rescale of 64 : 1 : 5 :  
0

f1-score precision recall support  
AFIB 0.794458 0.805070 0.784346 204.0  
GSVT 0.808493 0.803568 0.813602 300.0  
SB 0.827982 0.827248 0.828723 892.0  
SR 0.821864 0.821989 0.821744 681.0  
macro avg 0.813199 0.814468 0.812104 2077.0  
micro avg 0.819892 0.819892 0.819892 2077.0  
weighted avg 0.819868 0.819925 0.819892 2077.0  
The result of Model Number:Dataset Number:Featuregroup Number:Rescale of 64 : 1 : 5 :  
1

f1-score precision recall support  
AFIB 0.726637 0.743069 0.710938 875.0  
GSVT 0.770401 0.773679 0.767195 691.0  
SB 0.836495 0.832553 0.840480 1553.0  
SR 0.792568 0.780411 0.805143 907.0  
macro avg 0.781525 0.782428 0.780939 4026.0



micro avg 0.791787 0.791787 0.791787 4026.0  
weighted avg 0.791379 0.791253 0.791787 4026.0  
The result of Model Number:Dataset Number:Featuregroup Number:Rescale of 64 : 1 : 6 :  
0

|              | f1-score | precision | recall   | support |
|--------------|----------|-----------|----------|---------|
| AFIB         | 0.705530 | 0.728449  | 0.684143 | 204.0   |
| GSVT         | 0.718905 | 0.712470  | 0.725600 | 300.0   |
| SB           | 0.736000 | 0.730955  | 0.741115 | 892.0   |
| SR           | 0.723996 | 0.727051  | 0.721010 | 681.0   |
| macro avg    | 0.721108 | 0.724731  | 0.717967 | 2077.0  |
| micro avg    | 0.726687 | 0.726687  | 0.726687 | 2077.0  |
| weighted avg | 0.726602 | 0.726759  | 0.726687 | 2077.0  |

The result of Model Number:Dataset Number:Featuregroup Number:Rescale of 64 : 1 : 6 :  
1

|              | f1-score | precision | recall   | support |
|--------------|----------|-----------|----------|---------|
| AFIB         | 0.818500 | 0.801009  | 0.836819 | 875.0   |
| GSVT         | 0.847609 | 0.860570  | 0.835108 | 691.0   |
| SB           | 0.903549 | 0.903668  | 0.903433 | 1553.0  |
| SR           | 0.880271 | 0.889387  | 0.871343 | 907.0   |
| macro avg    | 0.862482 | 0.863659  | 0.861676 | 4026.0  |
| micro avg    | 0.869999 | 0.869999  | 0.869999 | 4026.0  |
| weighted avg | 0.870219 | 0.870742  | 0.869999 | 4026.0  |

The result of Model Number:Dataset Number:Featuregroup Number:Rescale of 64 : 1 : 7 :  
0

|              | f1-score | precision | recall   | support |
|--------------|----------|-----------|----------|---------|
| AFIB         | 0.630141 | 0.633038  | 0.627302 | 875.0   |
| GSVT         | 0.603949 | 0.607588  | 0.600374 | 691.0   |
| SB           | 0.647834 | 0.618957  | 0.679569 | 1553.0  |
| SR           | 0.554040 | 0.603145  | 0.512440 | 907.0   |
| macro avg    | 0.608991 | 0.615682  | 0.604921 | 4026.0  |
| micro avg    | 0.616965 | 0.616965  | 0.616965 | 4026.0  |
| weighted avg | 0.615326 | 0.616504  | 0.616965 | 4026.0  |

The result of Model Number:Dataset Number:Featuregroup Number:Rescale of 64 : 1 : 7 :  
1

|              | f1-score | precision | recall   | support |
|--------------|----------|-----------|----------|---------|
| AFIB         | 0.761791 | 0.757955  | 0.765699 | 875.0   |
| GSVT         | 0.776629 | 0.780389  | 0.772918 | 691.0   |
| SB           | 0.827157 | 0.825254  | 0.829073 | 1553.0  |
| SR           | 0.806450 | 0.810765  | 0.802190 | 907.0   |
| macro avg    | 0.793007 | 0.793591  | 0.792470 | 4026.0  |
| micro avg    | 0.799605 | 0.799605  | 0.799605 | 4026.0  |
| weighted avg | 0.799613 | 0.799663  | 0.799605 | 4026.0  |

The result of Model Number:Dataset Number:Featuregroup Number:Rescale of 64 : 1 : 8 :  
0

|              | f1-score | precision | recall   | support |
|--------------|----------|-----------|----------|---------|
| AFIB         | 0.907353 | 0.912784  | 0.902033 | 204.0   |
| GSVT         | 0.931524 | 0.928755  | 0.934316 | 300.0   |
| SB           | 0.945789 | 0.944630  | 0.946954 | 892.0   |
| SR           | 0.938894 | 0.940002  | 0.937796 | 681.0   |
| macro avg    | 0.930890 | 0.931543  | 0.930275 | 2077.0  |
| micro avg    | 0.937714 | 0.937714  | 0.937714 | 2077.0  |
| weighted avg | 0.937693 | 0.937692  | 0.937714 | 2077.0  |

The result of Model Number:Dataset Number:Featuregroup Number:Rescale of 64 : 1 : 8 : 1

|              | f1-score | precision | recall   | support |
|--------------|----------|-----------|----------|---------|
| AFIB         | 0.875564 | 0.891318  | 0.860616 | 204.0   |
| GSVT         | 0.895317 | 0.882728  | 0.908418 | 300.0   |
| SB           | 0.909093 | 0.898352  | 0.920098 | 892.0   |
| SR           | 0.890809 | 0.906669  | 0.875505 | 681.0   |
| macro avg    | 0.892696 | 0.894767  | 0.891159 | 2077.0  |
| micro avg    | 0.897948 | 0.897948  | 0.897948 | 2077.0  |
| weighted avg | 0.897815 | 0.898131  | 0.897948 | 2077.0  |

The result of Model Number:Dataset Number:Featuregroup Number:Rescale of 64 : 1 : 9 : 0

|              | f1-score | precision | recall   | support |
|--------------|----------|-----------|----------|---------|
| AFIB         | 0.738215 | 0.734082  | 0.742430 | 875.0   |
| GSVT         | 0.744226 | 0.748617  | 0.739932 | 691.0   |
| SB           | 0.783981 | 0.781527  | 0.786453 | 1553.0  |
| SR           | 0.768460 | 0.773544  | 0.763461 | 907.0   |
| macro avg    | 0.758721 | 0.759443  | 0.758069 | 4026.0  |
| micro avg    | 0.763721 | 0.763721  | 0.763721 | 4026.0  |
| weighted avg | 0.763714 | 0.763769  | 0.763721 | 4026.0  |

The result of Model Number:Dataset Number:Featuregroup Number:Rescale of 64 : 1 : 9 : 1

|              | f1-score | precision | recall   | support |
|--------------|----------|-----------|----------|---------|
| AFIB         | 0.673819 | 0.626601  | 0.791273 | 875.0   |
| GSVT         | 0.577887 | 0.539538  | 0.653648 | 691.0   |
| SB           | 0.690538 | 0.684712  | 0.696480 | 1553.0  |
| SR           | 0.665578 | 0.681711  | 0.650423 | 907.0   |
| macro avg    | 0.651956 | 0.633141  | 0.697956 | 4026.0  |
| micro avg    | 0.699355 | 0.699355  | 0.699355 | 4026.0  |
| weighted avg | 0.661947 | 0.646489  | 0.699355 | 4026.0  |

The result of Model Number:Dataset Number:Featuregroup Number:Rescale of 64 : 1 : 10 : 0

|      | f1-score | precision | recall   | support |
|------|----------|-----------|----------|---------|
| AFIB | 0.859847 | 0.873031  | 0.847196 | 204.0   |
| GSVT | 0.880235 | 0.872767  | 0.887869 | 300.0   |
| SB   | 0.895547 | 0.892657  | 0.898458 | 892.0   |

SR 0.886344 0.889634 0.883089 681.0  
macro avg 0.880493 0.882022 0.879153 2077.0  
micro avg 0.886855 0.886855 0.886855 2077.0  
weighted avg 0.886811 0.886865 0.886855 2077.0  
The result of Model Number:Dataset Number:Featuregroup Number:Rescale of 64 : 1 :

10 : 1

f1-score precision recall support

AFIB 0.643862 0.635416 0.652564 875.0  
GSVT 0.653719 0.660985 0.646622 691.0  
SB 0.693353 0.691717 0.695002 1553.0  
SR 0.675994 0.682078 0.670027 907.0  
macro avg 0.666732 0.667549 0.666054 4026.0  
micro avg 0.671848 0.671848 0.671848 4026.0  
weighted avg 0.671883 0.672034 0.671848 4026.0

The result of Model Number:Dataset Number:Featuregroup Number:Rescale of 65 : 0 : 0 : 0

f1-score precision recall support

AFIB 0.707858 0.696526 0.796484 204.0  
GSVT 0.828715 0.819099 0.838862 300.0  
SB 0.856463 0.853229 0.859728 892.0  
SR 0.671997 0.675471 0.668672 681.0  
macro avg 0.766258 0.761081 0.790936 2077.0  
micro avg 0.787859 0.787859 0.787859 2077.0  
weighted avg 0.777377 0.774626 0.787859 2077.0

The result of Model Number:Dataset Number:Featuregroup Number:Rescale of 65 : 0 : 0 : 1

f1-score precision recall support

AFIB 0.727852 0.731670 0.724117 875.0  
GSVT 0.743071 0.741736 0.744463 691.0  
SB 0.806848 0.800660 0.813133 1553.0  
SR 0.778381 0.786172 0.770748 907.0  
macro avg 0.764038 0.765059 0.763115 4026.0  
micro avg 0.772452 0.772452 0.772452 4026.0  
weighted avg 0.772319 0.772289 0.772452 4026.0

The result of Model Number:Dataset Number:Featuregroup Number:Rescale of 65 : 0 : 1 : 0

f1-score precision recall support

AFIB 0.655688 0.691355 0.623687 204.0  
GSVT 0.688351 0.677940 0.699114 300.0  
SB 0.704708 0.700124 0.709364 892.0  
SR 0.696014 0.696642 0.695404 681.0  
macro avg 0.686190 0.691515 0.681892 2077.0  
micro avg 0.694891 0.694891 0.694891 2077.0  
weighted avg 0.694680 0.694917 0.694891 2077.0

The result of Model Number:Dataset Number:Featuregroup Number:Rescale of 65 : 0 : 1 : 1

|              | f1-score | precision | recall   | support |
|--------------|----------|-----------|----------|---------|
| AFIB         | 0.883052 | 0.907395  | 0.860158 | 204.0   |
| GSVT         | 0.906553 | 0.889771  | 0.924066 | 300.0   |
| SB           | 0.921255 | 0.912642  | 0.930034 | 892.0   |
| SR           | 0.898099 | 0.910300  | 0.886236 | 681.0   |
| macro avg    | 0.902240 | 0.905027  | 0.900123 | 2077.0  |
| micro avg    | 0.907948 | 0.907948  | 0.907948 | 2077.0  |
| weighted avg | 0.907787 | 0.908055  | 0.907948 | 2077.0  |

The result of Model Number:Dataset Number:Featuregroup Number:Rescale of 65 : 0 : 2 : 0

|              | f1-score | precision | recall   | support |
|--------------|----------|-----------|----------|---------|
| AFIB         | 0.824431 | 0.824578  | 0.824320 | 875.0   |
| GSVT         | 0.833154 | 0.835968  | 0.830411 | 691.0   |
| SB           | 0.875185 | 0.872168  | 0.878228 | 1553.0  |
| SR           | 0.858566 | 0.861462  | 0.855721 | 907.0   |
| macro avg    | 0.847834 | 0.848544  | 0.847170 | 4026.0  |
| micro avg    | 0.853234 | 0.853234  | 0.853234 | 4026.0  |
| weighted avg | 0.853196 | 0.853200  | 0.853234 | 4026.0  |

The result of Model Number:Dataset Number:Featuregroup Number:Rescale of 65 : 0 : 2 : 1

|              | f1-score | precision | recall   | support |
|--------------|----------|-----------|----------|---------|
| AFIB         | 0.800516 | 0.862909  | 0.746910 | 204.0   |
| GSVT         | 0.824928 | 0.838893  | 0.811456 | 300.0   |
| SB           | 0.874269 | 0.866222  | 0.882493 | 892.0   |
| SR           | 0.839472 | 0.827299  | 0.852048 | 681.0   |
| macro avg    | 0.834796 | 0.848831  | 0.823227 | 2077.0  |
| micro avg    | 0.848933 | 0.848933  | 0.848933 | 2077.0  |
| weighted avg | 0.848489 | 0.849187  | 0.848933 | 2077.0  |

The result of Model Number:Dataset Number:Featuregroup Number:Rescale of 65 : 0 : 3 : 0

|              | f1-score | precision | recall   | support |
|--------------|----------|-----------|----------|---------|
| AFIB         | 0.820073 | 0.822895  | 0.817374 | 875.0   |
| GSVT         | 0.835642 | 0.818970  | 0.853158 | 691.0   |
| SB           | 0.884594 | 0.879810  | 0.889435 | 1553.0  |
| SR           | 0.850380 | 0.870152  | 0.831537 | 907.0   |
| macro avg    | 0.847672 | 0.847957  | 0.847876 | 4026.0  |
| micro avg    | 0.854503 | 0.854503  | 0.854503 | 4026.0  |
| weighted avg | 0.854461 | 0.854822  | 0.854503 | 4026.0  |

The result of Model Number:Dataset Number:Featuregroup Number:Rescale of 65 : 0 : 3 : 1

|      | f1-score | precision | recall   | support |
|------|----------|-----------|----------|---------|
| AFIB | 0.798619 | 0.799960  | 0.818413 | 204.0   |

GSVT 0.791111 0.821811 0.763642 300.0  
SB 0.839145 0.793126 0.891178 892.0  
SR 0.727360 0.794485 0.672535 681.0  
macro avg 0.789059 0.802345 0.786442 2077.0  
micro avg 0.793922 0.793922 0.793922 2077.0  
weighted avg 0.791575 0.798386 0.793922 2077.0  
The result of Model Number:Dataset Number:Featuregroup Number:Rescale of 65 : 0 : 4 :  
0

f1-score precision recall support  
AFIB 0.707402 0.722301 0.693217 204.0  
GSVT 0.729396 0.722732 0.736200 300.0  
SB 0.741308 0.739656 0.742971 892.0  
SR 0.732499 0.733264 0.731743 681.0  
macro avg 0.727651 0.729488 0.726033 2077.0  
micro avg 0.733425 0.733425 0.733425 2077.0  
weighted avg 0.733369 0.733411 0.733425 2077.0  
The result of Model Number:Dataset Number:Featuregroup Number:Rescale of 65 : 0 : 4 :  
1

f1-score precision recall support  
AFIB 0.848916 0.864671 0.833936 204.0  
GSVT 0.867583 0.863034 0.872198 300.0  
SB 0.881434 0.878301 0.884595 892.0  
SR 0.872360 0.873932 0.870831 681.0  
macro avg 0.867573 0.869984 0.865390 2077.0  
micro avg 0.873316 0.873316 0.873316 2077.0  
weighted avg 0.873264 0.873325 0.873316 2077.0  
The result of Model Number:Dataset Number:Featuregroup Number:Rescale of 65 : 0 : 5 :  
0

f1-score precision recall support  
AFIB 0.764077 0.748647 0.780219 875.0  
GSVT 0.789410 0.801962 0.777415 691.0  
SB 0.839944 0.839897 0.839998 1553.0  
SR 0.819579 0.827047 0.812258 907.0  
macro avg 0.803253 0.804388 0.802473 4026.0  
micro avg 0.810015 0.810015 0.810015 4026.0  
weighted avg 0.810194 0.810659 0.810015 4026.0  
The result of Model Number:Dataset Number:Featuregroup Number:Rescale of 65 : 0 : 5 :  
1

f1-score precision recall support  
AFIB 0.766480 0.785596 0.748331 875.0  
GSVT 0.815401 0.818527 0.812337 691.0  
SB 0.883011 0.878736 0.887331 1553.0  
SR 0.836702 0.822756 0.851183 907.0  
macro avg 0.825399 0.826404 0.824795 4026.0

micro avg 0.836106 0.836106 0.836106 4026.0  
weighted avg 0.835648 0.835548 0.836106 4026.0  
The result of Model Number:Dataset Number:Featuregroup Number:Rescale of 65 : 0 : 6 :  
0

f1-score precision recall support  
AFIB 0.782293 0.800889 0.764628 204.0  
GSVT 0.802602 0.799505 0.805808 300.0  
SB 0.822491 0.820655 0.824335 892.0  
SR 0.812143 0.810509 0.813813 681.0  
macro avg 0.804882 0.807890 0.802146 2077.0  
micro avg 0.812344 0.812344 0.812344 2077.0  
weighted avg 0.812277 0.812332 0.812344 2077.0

The result of Model Number:Dataset Number:Featuregroup Number:Rescale of 65 : 0 : 6 :  
1

f1-score precision recall support  
AFIB 0.731798 0.726200 0.737579 875.0  
GSVT 0.748636 0.752729 0.744630 691.0  
SB 0.792745 0.792189 0.793306 1553.0  
SR 0.771688 0.775431 0.768021 907.0  
macro avg 0.761216 0.761637 0.760884 4026.0  
micro avg 0.767144 0.767144 0.767144 4026.0  
weighted avg 0.767184 0.767299 0.767144 4026.0

The result of Model Number:Dataset Number:Featuregroup Number:Rescale of 65 : 0 : 7 :  
0

f1-score precision recall support  
AFIB 0.615717 0.606446 0.630402 875.0  
GSVT 0.587898 0.586187 0.592914 691.0  
SB 0.627800 0.585009 0.682565 1553.0  
SR 0.465050 0.621635 0.385350 907.0  
macro avg 0.574116 0.599819 0.572808 4026.0  
micro avg 0.588883 0.588883 0.588883 4026.0  
weighted avg 0.581660 0.598122 0.588883 4026.0

The result of Model Number:Dataset Number:Featuregroup Number:Rescale of 65 : 0 : 7 :  
1

f1-score precision recall support  
AFIB 0.756138 0.780375 0.733588 204.0  
GSVT 0.778760 0.765362 0.792750 300.0  
SB 0.792231 0.784400 0.800223 892.0  
SR 0.771049 0.780697 0.761652 681.0  
macro avg 0.774545 0.777709 0.772053 2077.0  
micro avg 0.779952 0.779952 0.779952 2077.0  
weighted avg 0.779795 0.780041 0.779952 2077.0

The result of Model Number:Dataset Number:Featuregroup Number:Rescale of 65 : 0 : 8 :  
0

f1-score precision recall support  
AFIB 0.854009 0.869682 0.839302 204.0  
GSVT 0.886428 0.879301 0.893834 300.0  
SB 0.902872 0.901260 0.904491 892.0  
SR 0.893932 0.894728 0.893143 681.0  
macro avg 0.884310 0.886243 0.882693 2077.0  
micro avg 0.892828 0.892828 0.892828 2077.0  
weighted avg 0.892766 0.892845 0.892828 2077.0  
The result of Model Number:Dataset Number:Featuregroup Number:Rescale of 65 : 0 : 8 :  
1

f1-score precision recall support  
AFIB 0.836930 0.815513 0.859580 875.0  
GSVT 0.791158 0.835998 0.751066 691.0  
SB 0.838904 0.771993 0.918535 1553.0  
SR 0.670143 0.813976 0.569629 907.0  
macro avg 0.784284 0.809370 0.774703 4026.0  
micro avg 0.798375 0.798375 0.798375 4026.0  
weighted avg 0.792261 0.801895 0.798375 4026.0  
The result of Model Number:Dataset Number:Featuregroup Number:Rescale of 65 : 0 : 9 :  
0

f1-score precision recall support  
AFIB 0.730924 0.733067 0.728850 875.0  
GSVT 0.743018 0.733475 0.752909 691.0  
SB 0.786361 0.784450 0.788285 1553.0  
SR 0.766449 0.775545 0.757572 907.0  
macro avg 0.756688 0.756634 0.756904 4026.0  
micro avg 0.762377 0.762377 0.762377 4026.0  
weighted avg 0.762388 0.762527 0.762377 4026.0  
The result of Model Number:Dataset Number:Featuregroup Number:Rescale of 65 : 0 : 9 :  
1

f1-score precision recall support  
AFIB 0.868708 0.887004 0.851288 204.0  
GSVT 0.895717 0.887534 0.904073 300.0  
SB 0.910346 0.908316 0.912387 892.0  
SR 0.899527 0.900467 0.898599 681.0  
macro avg 0.893574 0.895830 0.891587 2077.0  
micro avg 0.900664 0.900664 0.900664 2077.0  
weighted avg 0.900596 0.900648 0.900664 2077.0  
The result of Model Number:Dataset Number:Featuregroup Number:Rescale of 65 : 0 :  
10 : 0

f1-score precision recall support  
AFIB 0.734249 0.739999 0.728626 875.0  
GSVT 0.736186 0.726790 0.745873 691.0  
SB 0.772176 0.769079 0.775306 1553.0

SR 0.755862 0.763281 0.748613 907.0  
macro avg 0.749618 0.749787 0.749604 4026.0  
micro avg 0.754095 0.754095 0.754095 4026.0  
weighted avg 0.754080 0.754194 0.754095 4026.0  
The result of Model Number:Dataset Number:Featuregroup Number:Rescale of 65 : 0 :  
10 : 1

f1-score precision recall support  
AFIB 0.825930 0.830023 0.821965 875.0  
GSVT 0.834154 0.835355 0.833082 691.0  
SB 0.878059 0.873985 0.882181 1553.0  
SR 0.861895 0.864054 0.859795 907.0  
macro avg 0.850009 0.850854 0.849256 4026.0  
micro avg 0.855623 0.855623 0.855623 4026.0  
weighted avg 0.855552 0.855563 0.855623 4026.0  
The result of Model Number:Dataset Number:Featuregroup Number:Rescale of 65 : 1 : 0 :  
0

f1-score precision recall support  
AFIB 0.872336 0.878611 0.866152 875.0  
GSVT 0.870946 0.865731 0.876238 691.0  
SB 0.918720 0.908541 0.929132 1553.0  
SR 0.881583 0.897312 0.866426 907.0  
macro avg 0.885896 0.887549 0.884487 4026.0  
micro avg 0.892239 0.892239 0.892239 4026.0  
weighted avg 0.892073 0.892159 0.892239 4026.0  
The result of Model Number:Dataset Number:Featuregroup Number:Rescale of 65 : 1 : 0 :  
1

f1-score precision recall support  
AFIB 0.859327 0.849144 0.869830 875.0  
GSVT 0.871558 0.879984 0.863378 691.0  
SB 0.925014 0.921475 0.928587 1553.0  
SR 0.903448 0.913871 0.893286 907.0  
macro avg 0.889837 0.891119 0.888770 4026.0  
micro avg 0.896672 0.896672 0.896672 4026.0  
weighted avg 0.896704 0.896920 0.896672 4026.0  
The result of Model Number:Dataset Number:Featuregroup Number:Rescale of 65 : 1 : 1 :  
0

f1-score precision recall support  
AFIB 0.674948 0.665573 0.684656 875.0  
GSVT 0.699068 0.708394 0.690075 691.0  
SB 0.742637 0.741115 0.744167 1553.0  
SR 0.723308 0.728897 0.717805 907.0  
macro avg 0.709990 0.710995 0.709176 4026.0  
micro avg 0.716010 0.716010 0.716010 4026.0  
weighted avg 0.716093 0.716328 0.716010 4026.0



The result of Model Number:Dataset Number:Featuregroup Number:Rescale of 65 : 1 : 1 : 1

|              | f1-score | precision | recall   | support |
|--------------|----------|-----------|----------|---------|
| AFIB         | 0.769052 | 0.797565  | 0.742617 | 204.0   |
| GSVT         | 0.792092 | 0.782188  | 0.802351 | 300.0   |
| SB           | 0.812178 | 0.804767  | 0.819733 | 892.0   |
| SR           | 0.790825 | 0.796962  | 0.784789 | 681.0   |
| macro avg    | 0.791037 | 0.795370  | 0.787372 | 2077.0  |
| micro avg    | 0.798191 | 0.798191  | 0.798191 | 2077.0  |
| weighted avg | 0.798040 | 0.798239  | 0.798191 | 2077.0  |

The result of Model Number:Dataset Number:Featuregroup Number:Rescale of 65 : 1 : 2 : 0

|              | f1-score | precision | recall   | support |
|--------------|----------|-----------|----------|---------|
| AFIB         | 0.858309 | 0.858538  | 0.858230 | 875.0   |
| GSVT         | 0.873255 | 0.870031  | 0.876613 | 691.0   |
| SB           | 0.934213 | 0.931945  | 0.936496 | 1553.0  |
| SR           | 0.911933 | 0.918477  | 0.905506 | 907.0   |
| macro avg    | 0.894427 | 0.894748  | 0.894211 | 4026.0  |
| micro avg    | 0.902226 | 0.902226  | 0.902226 | 4026.0  |
| weighted avg | 0.902234 | 0.902330  | 0.902226 | 4026.0  |

The result of Model Number:Dataset Number:Featuregroup Number:Rescale of 65 : 1 : 2 : 1

|              | f1-score | precision | recall   | support |
|--------------|----------|-----------|----------|---------|
| AFIB         | 0.729797 | 0.745903  | 0.714426 | 204.0   |
| GSVT         | 0.745747 | 0.733380  | 0.758627 | 300.0   |
| SB           | 0.760076 | 0.754131  | 0.766124 | 892.0   |
| SR           | 0.741630 | 0.750557  | 0.732916 | 681.0   |
| macro avg    | 0.744313 | 0.745993  | 0.743023 | 2077.0  |
| micro avg    | 0.749075 | 0.749075  | 0.749075 | 2077.0  |
| weighted avg | 0.748985 | 0.749154  | 0.749075 | 2077.0  |

The result of Model Number:Dataset Number:Featuregroup Number:Rescale of 65 : 1 : 3 : 0

|              | f1-score | precision | recall   | support |
|--------------|----------|-----------|----------|---------|
| AFIB         | 0.827052 | 0.845476  | 0.809652 | 204.0   |
| GSVT         | 0.837256 | 0.824993  | 0.850237 | 300.0   |
| SB           | 0.856176 | 0.847667  | 0.864894 | 892.0   |
| SR           | 0.840382 | 0.852453  | 0.828675 | 681.0   |
| macro avg    | 0.840216 | 0.842647  | 0.838364 | 2077.0  |
| micro avg    | 0.845476 | 0.845476  | 0.845476 | 2077.0  |
| weighted avg | 0.845404 | 0.845746  | 0.845476 | 2077.0  |

The result of Model Number:Dataset Number:Featuregroup Number:Rescale of 65 : 1 : 3 : 1

|      | f1-score | precision | recall   | support |
|------|----------|-----------|----------|---------|
| AFIB | 0.676489 | 0.678206  | 0.674805 | 875.0   |

GSVT 0.688427 0.680969 0.696078 691.0  
SB 0.725564 0.717356 0.733973 1553.0  
SR 0.692390 0.711346 0.674446 907.0  
macro avg 0.695717 0.696969 0.694825 4026.0  
micro avg 0.701199 0.701199 0.701199 4026.0  
weighted avg 0.701051 0.701248 0.701199 4026.0  
The result of Model Number:Dataset Number:Featuregroup Number:Rescale of 65 : 1 : 4 :  
0

f1-score precision recall support  
AFIB 0.662254 0.666983 0.657711 204.0  
GSVT 0.685412 0.684970 0.685867 300.0  
SB 0.699125 0.697574 0.700690 892.0  
SR 0.692876 0.693714 0.692061 681.0  
macro avg 0.684917 0.685810 0.684082 2077.0  
micro avg 0.691499 0.691499 0.691499 2077.0  
weighted avg 0.691474 0.691483 0.691499 2077.0  
The result of Model Number:Dataset Number:Featuregroup Number:Rescale of 65 : 1 : 4 :  
1

f1-score precision recall support  
AFIB 0.690988 0.699473 0.682815 204.0  
GSVT 0.704906 0.701895 0.707959 300.0  
SB 0.713439 0.711297 0.715597 892.0  
SR 0.707434 0.709118 0.705781 681.0  
macro avg 0.704192 0.705446 0.703038 2077.0  
micro avg 0.708055 0.708055 0.708055 2077.0  
weighted avg 0.708033 0.708063 0.708055 2077.0  
The result of Model Number:Dataset Number:Featuregroup Number:Rescale of 65 : 1 : 5 :  
0

f1-score precision recall support  
AFIB 0.852616 0.857279 0.848033 875.0  
GSVT 0.848553 0.841398 0.855916 691.0  
SB 0.892466 0.884014 0.901084 1553.0  
SR 0.859251 0.875279 0.843811 907.0  
macro avg 0.863222 0.864493 0.862211 4026.0  
micro avg 0.868899 0.868899 0.868899 4026.0  
weighted avg 0.868785 0.868921 0.868899 4026.0  
The result of Model Number:Dataset Number:Featuregroup Number:Rescale of 65 : 1 : 5 :  
1

f1-score precision recall support  
AFIB 0.891307 0.884490 0.898349 875.0  
GSVT 0.911815 0.916801 0.906937 691.0  
SB 0.965539 0.964862 0.966223 1553.0  
SR 0.939892 0.944451 0.935426 907.0  
macro avg 0.927138 0.927651 0.926734 4026.0

micro avg 0.934358 0.934358 0.934358 4026.0  
weighted avg 0.934407 0.934547 0.934358 4026.0  
The result of Model Number:Dataset Number:Featuregroup Number:Rescale of 65 : 1 : 6 :  
0

|              | f1-score | precision | recall   | support |
|--------------|----------|-----------|----------|---------|
| AFIB         | 0.733927 | 0.739729  | 0.728240 | 875.0   |
| GSVT         | 0.752395 | 0.750804  | 0.754021 | 691.0   |
| SB           | 0.802075 | 0.794986  | 0.809302 | 1553.0  |
| SR           | 0.780723 | 0.788380  | 0.773232 | 907.0   |
| macro avg    | 0.767280 | 0.768475  | 0.766199 | 4026.0  |
| micro avg    | 0.774070 | 0.774070  | 0.774070 | 4026.0  |
| weighted avg | 0.773927 | 0.773905  | 0.774070 | 4026.0  |

The result of Model Number:Dataset Number:Featuregroup Number:Rescale of 65 : 1 : 6 :  
1

|              | f1-score | precision | recall   | support |
|--------------|----------|-----------|----------|---------|
| AFIB         | 0.738889 | 0.771728  | 0.708832 | 204.0   |
| GSVT         | 0.769679 | 0.763638  | 0.775835 | 300.0   |
| SB           | 0.781437 | 0.775408  | 0.787566 | 892.0   |
| SR           | 0.772791 | 0.774067  | 0.771547 | 681.0   |
| macro avg    | 0.765699 | 0.771210  | 0.760945 | 2077.0  |
| micro avg    | 0.772886 | 0.772886  | 0.772886 | 2077.0  |
| weighted avg | 0.772725 | 0.772907  | 0.772886 | 2077.0  |

The result of Model Number:Dataset Number:Featuregroup Number:Rescale of 65 : 1 : 7 :  
0

|              | f1-score | precision | recall   | support |
|--------------|----------|-----------|----------|---------|
| AFIB         | 0.705040 | 0.703544  | 0.706574 | 875.0   |
| GSVT         | 0.716054 | 0.712622  | 0.719580 | 691.0   |
| SB           | 0.753644 | 0.744647  | 0.762863 | 1553.0  |
| SR           | 0.718621 | 0.738980  | 0.699369 | 907.0   |
| macro avg    | 0.723340 | 0.724948  | 0.722097 | 4026.0  |
| micro avg    | 0.728896 | 0.728896  | 0.728896 | 4026.0  |
| weighted avg | 0.728739 | 0.728941  | 0.728896 | 4026.0  |

The result of Model Number:Dataset Number:Featuregroup Number:Rescale of 65 : 1 : 7 :  
1

|              | f1-score | precision | recall   | support |
|--------------|----------|-----------|----------|---------|
| AFIB         | 0.651583 | 0.641363  | 0.662204 | 875.0   |
| GSVT         | 0.627843 | 0.645842  | 0.610893 | 691.0   |
| SB           | 0.659758 | 0.626315  | 0.697013 | 1553.0  |
| SR           | 0.536050 | 0.596515  | 0.486799 | 907.0   |
| macro avg    | 0.618808 | 0.627509  | 0.614227 | 4026.0  |
| micro avg    | 0.627308 | 0.627308  | 0.627308 | 4026.0  |
| weighted avg | 0.624634 | 0.626223  | 0.627308 | 4026.0  |

The result of Model Number:Dataset Number:Featuregroup Number:Rescale of 65 : 1 : 8 :  
0

f1-score precision recall support

|              |          |          |          |        |
|--------------|----------|----------|----------|--------|
| AFIB         | 0.827882 | 0.829553 | 0.826234 | 204.0  |
| GSVT         | 0.850914 | 0.848384 | 0.853463 | 300.0  |
| SB           | 0.865013 | 0.864242 | 0.865788 | 892.0  |
| SR           | 0.857578 | 0.859225 | 0.855949 | 681.0  |
| macro avg    | 0.850347 | 0.850351 | 0.850359 | 2077.0 |
| micro avg    | 0.856897 | 0.856897 | 0.856897 | 2077.0 |
| weighted avg | 0.856892 | 0.856900 | 0.856897 | 2077.0 |

The result of Model Number:Dataset Number:Featuregroup Number:Rescale of 65 : 1 : 8 : 1

f1-score precision recall support

|              |          |          |          |        |
|--------------|----------|----------|----------|--------|
| AFIB         | 0.871968 | 0.885188 | 0.859159 | 204.0  |
| GSVT         | 0.885989 | 0.878520 | 0.893632 | 300.0  |
| SB           | 0.905641 | 0.902720 | 0.908584 | 892.0  |
| SR           | 0.895919 | 0.899247 | 0.892641 | 681.0  |
| macro avg    | 0.889879 | 0.891419 | 0.888504 | 2077.0 |
| micro avg    | 0.896342 | 0.896342 | 0.896342 | 2077.0 |
| weighted avg | 0.896308 | 0.896364 | 0.896342 | 2077.0 |

The result of Model Number:Dataset Number:Featuregroup Number:Rescale of 65 : 1 : 9 : 0

f1-score precision recall support

|              |          |          |          |        |
|--------------|----------|----------|----------|--------|
| AFIB         | 0.822325 | 0.811749 | 0.833239 | 875.0  |
| GSVT         | 0.839065 | 0.846011 | 0.832266 | 691.0  |
| SB           | 0.897129 | 0.893136 | 0.901168 | 1553.0 |
| SR           | 0.871598 | 0.884490 | 0.859099 | 907.0  |
| macro avg    | 0.857529 | 0.858846 | 0.856443 | 4026.0 |
| micro avg    | 0.865101 | 0.865101 | 0.865101 | 4026.0 |
| weighted avg | 0.865154 | 0.865411 | 0.865101 | 4026.0 |

The result of Model Number:Dataset Number:Featuregroup Number:Rescale of 65 : 1 : 9 : 1

f1-score precision recall support

|              |          |          |          |        |
|--------------|----------|----------|----------|--------|
| AFIB         | 0.795250 | 0.798883 | 0.791695 | 875.0  |
| GSVT         | 0.808508 | 0.801670 | 0.815522 | 691.0  |
| SB           | 0.854609 | 0.845882 | 0.863523 | 1553.0 |
| SR           | 0.810503 | 0.827589 | 0.794151 | 907.0  |
| macro avg    | 0.817218 | 0.818506 | 0.816223 | 4026.0 |
| micro avg    | 0.824045 | 0.824045 | 0.824045 | 4026.0 |
| weighted avg | 0.823859 | 0.823958 | 0.824045 | 4026.0 |

The result of Model Number:Dataset Number:Featuregroup Number:Rescale of 65 : 1 : 10 : 0

f1-score precision recall support

|      |          |          |          |        |
|------|----------|----------|----------|--------|
| AFIB | 0.775262 | 0.765092 | 0.785740 | 875.0  |
| GSVT | 0.787131 | 0.795880 | 0.778586 | 691.0  |
| SB   | 0.834854 | 0.832883 | 0.836839 | 1553.0 |

SR 0.813951 0.821277 0.806767 907.0  
macro avg 0.802799 0.803783 0.801983 4026.0  
micro avg 0.808960 0.808960 0.808960 4026.0  
weighted avg 0.809002 0.809184 0.808960 4026.0  
The result of Model Number:Dataset Number:Featuregroup Number:Rescale of 65 : 1 :

10 : 1

f1-score precision recall support

AFIB 0.733829 0.743753 0.724475 204.0  
GSVT 0.761703 0.760467 0.762970 300.0  
SB 0.778244 0.777208 0.779291 892.0  
SR 0.770290 0.769303 0.771306 681.0  
macro avg 0.761017 0.762682 0.759510 2077.0  
micro avg 0.768932 0.768932 0.768932 2077.0  
weighted avg 0.768884 0.768912 0.768932 2077.0

The result of Model Number:Dataset Number:Featuregroup Number:Rescale of 66 : 0 : 0 :  
0

f1-score precision recall support

AFIB 0.821445 0.818918 0.824039 875.0  
GSVT 0.800505 0.804431 0.796745 691.0  
SB 0.841555 0.806632 0.879647 1553.0  
SR 0.724228 0.790174 0.668499 907.0  
macro avg 0.796933 0.805039 0.792232 4026.0  
micro avg 0.805764 0.805764 0.805764 4026.0  
weighted avg 0.803707 0.805217 0.805764 4026.0

The result of Model Number:Dataset Number:Featuregroup Number:Rescale of 66 : 0 : 0 :  
1

f1-score precision recall support

AFIB 0.703949 0.713646 0.694822 875.0  
GSVT 0.719317 0.716338 0.722516 691.0  
SB 0.766185 0.756139 0.776533 1553.0  
SR 0.742130 0.753213 0.731698 907.0  
macro avg 0.732895 0.734834 0.731392 4026.0  
micro avg 0.739402 0.739402 0.739402 4026.0  
weighted avg 0.739195 0.739413 0.739402 4026.0

The result of Model Number:Dataset Number:Featuregroup Number:Rescale of 66 : 0 : 1 :  
0

f1-score precision recall support

AFIB 0.911028 0.927420 0.895474 204.0  
GSVT 0.931581 0.918482 0.945212 300.0  
SB 0.945915 0.934738 0.957366 892.0  
SR 0.926891 0.943393 0.910966 681.0  
macro avg 0.928853 0.931008 0.927255 2077.0  
micro avg 0.934318 0.934318 0.934318 2077.0  
weighted avg 0.934180 0.934509 0.934318 2077.0

The result of Model Number:Dataset Number:Featuregroup Number:Rescale of 66 : 0 : 1 : 1

|              | f1-score | precision | recall   | support |
|--------------|----------|-----------|----------|---------|
| AFIB         | 0.887137 | 0.903419  | 0.871860 | 204.0   |
| GSVT         | 0.920815 | 0.913411  | 0.928508 | 300.0   |
| SB           | 0.937896 | 0.936222  | 0.939578 | 892.0   |
| SR           | 0.928609 | 0.929436  | 0.927789 | 681.0   |
| macro avg    | 0.918614 | 0.920622  | 0.916934 | 2077.0  |
| micro avg    | 0.927463 | 0.927463  | 0.927463 | 2077.0  |
| weighted avg | 0.927398 | 0.927480  | 0.927463 | 2077.0  |

The result of Model Number:Dataset Number:Featuregroup Number:Rescale of 66 : 0 : 2 : 0

|              | f1-score | precision | recall   | support |
|--------------|----------|-----------|----------|---------|
| AFIB         | 0.789844 | 0.793452  | 0.786313 | 875.0   |
| GSVT         | 0.803012 | 0.796220  | 0.809978 | 691.0   |
| SB           | 0.848799 | 0.840132  | 0.857652 | 1553.0  |
| SR           | 0.804993 | 0.821963  | 0.788752 | 907.0   |
| macro avg    | 0.811662 | 0.812942  | 0.810674 | 4026.0  |
| micro avg    | 0.818443 | 0.818443  | 0.818443 | 4026.0  |
| weighted avg | 0.818258 | 0.818357  | 0.818443 | 4026.0  |

The result of Model Number:Dataset Number:Featuregroup Number:Rescale of 66 : 0 : 2 : 1

|              | f1-score | precision | recall   | support |
|--------------|----------|-----------|----------|---------|
| AFIB         | 0.660413 | 0.680441  | 0.641558 | 875.0   |
| GSVT         | 0.705000 | 0.700111  | 0.709996 | 691.0   |
| SB           | 0.771356 | 0.768405  | 0.774335 | 1553.0  |
| SR           | 0.729517 | 0.718568  | 0.740848 | 907.0   |
| macro avg    | 0.716571 | 0.716881  | 0.716684 | 4026.0  |
| micro avg    | 0.726890 | 0.726890  | 0.726890 | 4026.0  |
| weighted avg | 0.726429 | 0.726338  | 0.726890 | 4026.0  |

The result of Model Number:Dataset Number:Featuregroup Number:Rescale of 66 : 0 : 3 : 0

|              | f1-score | precision | recall   | support |
|--------------|----------|-----------|----------|---------|
| AFIB         | 0.796787 | 0.856684  | 0.745549 | 204.0   |
| GSVT         | 0.759872 | 0.783991  | 0.737308 | 300.0   |
| SB           | 0.791679 | 0.752503  | 0.835163 | 892.0   |
| SR           | 0.700813 | 0.730936  | 0.673147 | 681.0   |
| macro avg    | 0.762288 | 0.781029  | 0.747792 | 2077.0  |
| micro avg    | 0.759106 | 0.759106  | 0.759106 | 2077.0  |
| weighted avg | 0.757794 | 0.760213  | 0.759106 | 2077.0  |

The result of Model Number:Dataset Number:Featuregroup Number:Rescale of 66 : 0 : 3 : 1

|      | f1-score | precision | recall   | support |
|------|----------|-----------|----------|---------|
| AFIB | 0.674324 | 0.680391  | 0.668575 | 875.0   |

GSVT 0.688060 0.674108 0.702763 691.0  
SB 0.729692 0.721574 0.738082 1553.0  
SR 0.700736 0.721566 0.681241 907.0  
macro avg 0.698203 0.699410 0.697665 4026.0  
micro avg 0.704108 0.704108 0.704108 4026.0  
weighted avg 0.703990 0.704475 0.704108 4026.0  
The result of Model Number:Dataset Number:Featuregroup Number:Rescale of 66 : 0 : 4 :  
0

f1-score precision recall support  
AFIB 0.694178 0.699783 0.688723 204.0  
GSVT 0.710107 0.706625 0.713648 300.0  
SB 0.723966 0.723163 0.724777 892.0  
SR 0.718560 0.719515 0.717612 681.0  
macro avg 0.711703 0.712272 0.711190 2077.0  
micro avg 0.717279 0.717279 0.717279 2077.0  
weighted avg 0.717266 0.717282 0.717279 2077.0  
The result of Model Number:Dataset Number:Featuregroup Number:Rescale of 66 : 0 : 4 :  
1

f1-score precision recall support  
AFIB 0.697503 0.712133 0.683480 204.0  
GSVT 0.713684 0.709461 0.717964 300.0  
SB 0.731083 0.729370 0.732803 892.0  
SR 0.724907 0.724699 0.725122 681.0  
macro avg 0.716794 0.718916 0.714843 2077.0  
micro avg 0.723297 0.723297 0.723297 2077.0  
weighted avg 0.723247 0.723270 0.723297 2077.0  
The result of Model Number:Dataset Number:Featuregroup Number:Rescale of 66 : 0 : 5 :  
0

f1-score precision recall support  
AFIB 0.766302 0.773260 0.759862 204.0  
GSVT 0.791629 0.786845 0.796679 300.0  
SB 0.808191 0.807108 0.809278 892.0  
SR 0.800713 0.802373 0.799065 681.0  
macro avg 0.791709 0.792396 0.791221 2077.0  
micro avg 0.799256 0.799256 0.799256 2077.0  
weighted avg 0.799233 0.799304 0.799256 2077.0  
The result of Model Number:Dataset Number:Featuregroup Number:Rescale of 66 : 0 : 5 :  
1

f1-score precision recall support  
AFIB 0.699921 0.745525 0.659884 204.0  
GSVT 0.730583 0.712625 0.749569 300.0  
SB 0.752009 0.742349 0.761951 892.0  
SR 0.732477 0.741223 0.723983 681.0  
macro avg 0.728748 0.735431 0.723847 2077.0

micro avg 0.737689 0.737689 0.737689 2077.0  
weighted avg 0.737394 0.737998 0.737689 2077.0  
The result of Model Number:Dataset Number:Featuregroup Number:Rescale of 66 : 0 : 6 :  
0

|              | f1-score | precision | recall   | support |
|--------------|----------|-----------|----------|---------|
| AFIB         | 0.883077 | 0.872661  | 0.893780 | 875.0   |
| GSVT         | 0.900429 | 0.908260  | 0.892740 | 691.0   |
| SB           | 0.959635 | 0.955962  | 0.963340 | 1553.0  |
| SR           | 0.936993 | 0.948322  | 0.925942 | 907.0   |
| macro avg    | 0.920034 | 0.921301  | 0.918951 | 4026.0  |
| micro avg    | 0.927679 | 0.927679  | 0.927679 | 4026.0  |
| weighted avg | 0.927733 | 0.927949  | 0.927679 | 4026.0  |

The result of Model Number:Dataset Number:Featuregroup Number:Rescale of 66 : 0 : 6 :  
1

|              | f1-score | precision | recall   | support |
|--------------|----------|-----------|----------|---------|
| AFIB         | 0.643510 | 0.629686  | 0.657989 | 875.0   |
| GSVT         | 0.666422 | 0.676086  | 0.657074 | 691.0   |
| SB           | 0.709432 | 0.709297  | 0.709570 | 1553.0  |
| SR           | 0.691652 | 0.699691  | 0.683799 | 907.0   |
| macro avg    | 0.677754 | 0.678690  | 0.677108 | 4026.0  |
| micro avg    | 0.683544 | 0.683544  | 0.683544 | 4026.0  |
| weighted avg | 0.683717 | 0.684130  | 0.683544 | 4026.0  |

The result of Model Number:Dataset Number:Featuregroup Number:Rescale of 66 : 0 : 7 :  
0

|              | f1-score | precision | recall   | support |
|--------------|----------|-----------|----------|---------|
| AFIB         | 0.662770 | 0.668886  | 0.656800 | 875.0   |
| GSVT         | 0.678246 | 0.676415  | 0.680110 | 691.0   |
| SB           | 0.722341 | 0.715551  | 0.729268 | 1553.0  |
| SR           | 0.702383 | 0.709431  | 0.695488 | 907.0   |
| macro avg    | 0.691435 | 0.692571  | 0.690417 | 4026.0  |
| micro avg    | 0.697471 | 0.697471  | 0.697471 | 4026.0  |
| weighted avg | 0.697330 | 0.697313  | 0.697471 | 4026.0  |

The result of Model Number:Dataset Number:Featuregroup Number:Rescale of 66 : 0 : 7 :  
1

|              | f1-score | precision | recall   | support |
|--------------|----------|-----------|----------|---------|
| AFIB         | 0.920296 | 0.921331  | 0.919431 | 204.0   |
| GSVT         | 0.941425 | 0.939323  | 0.943608 | 300.0   |
| SB           | 0.961379 | 0.960096  | 0.962671 | 892.0   |
| SR           | 0.954179 | 0.956582  | 0.951800 | 681.0   |
| macro avg    | 0.944320 | 0.944333  | 0.944378 | 2077.0  |
| micro avg    | 0.952106 | 0.952106  | 0.952106 | 2077.0  |
| weighted avg | 0.952101 | 0.952136  | 0.952106 | 2077.0  |

The result of Model Number:Dataset Number:Featuregroup Number:Rescale of 66 : 0 : 8 :  
0



f1-score precision recall support  
AFIB 0.747707 0.730715 0.765559 875.0  
GSVT 0.773332 0.785872 0.761248 691.0  
SB 0.825060 0.825065 0.825061 1553.0  
SR 0.803944 0.813102 0.794991 907.0  
macro avg 0.787511 0.788689 0.786715 4026.0  
micro avg 0.794402 0.794402 0.794402 4026.0  
weighted avg 0.794613 0.795138 0.794402 4026.0  
The result of Model Number:Dataset Number:Featuregroup Number:Rescale of 66 : 0 : 8 :  
1

f1-score precision recall support  
AFIB 0.716865 0.731929 0.702435 875.0  
GSVT 0.763377 0.765999 0.760810 691.0  
SB 0.831710 0.827790 0.835670 1553.0  
SR 0.787306 0.776822 0.798144 907.0  
macro avg 0.774814 0.775635 0.774265 4026.0  
micro avg 0.785410 0.785410 0.785410 4026.0  
weighted avg 0.785018 0.784868 0.785410 4026.0  
The result of Model Number:Dataset Number:Featuregroup Number:Rescale of 66 : 0 : 9 :  
0

f1-score precision recall support  
AFIB 0.697951 0.715331 0.681429 875.0  
GSVT 0.737435 0.740566 0.734361 691.0  
SB 0.799882 0.796822 0.802971 1553.0  
SR 0.760864 0.746685 0.775631 907.0  
macro avg 0.749033 0.749851 0.748598 4026.0  
micro avg 0.758620 0.758620 0.758620 4026.0  
weighted avg 0.758220 0.758160 0.758620 4026.0  
The result of Model Number:Dataset Number:Featuregroup Number:Rescale of 66 : 0 : 9 :  
1

f1-score precision recall support  
AFIB 0.824037 0.840639 0.808606 204.0  
GSVT 0.850478 0.843647 0.857584 300.0  
SB 0.868890 0.868015 0.869767 892.0  
SR 0.860969 0.860475 0.861474 681.0  
macro avg 0.851093 0.853194 0.849358 2077.0  
micro avg 0.859281 0.859281 0.859281 2077.0  
weighted avg 0.859228 0.859334 0.859281 2077.0  
The result of Model Number:Dataset Number:Featuregroup Number:Rescale of 66 : 0 :  
10 : 0

f1-score precision recall support  
AFIB 0.893119 0.894909 0.891374 875.0  
GSVT 0.895331 0.890497 0.900241 691.0  
SB 0.935921 0.930921 0.940982 1553.0

SR 0.913531 0.924364 0.902974 907.0  
macro avg 0.909475 0.910173 0.908893 4026.0  
micro avg 0.914645 0.914645 0.914645 4026.0  
weighted avg 0.914608 0.914679 0.914645 4026.0  
The result of Model Number:Dataset Number:Featuregroup Number:Rescale of 66 : 0 :  
10 : 1

f1-score precision recall support  
AFIB 0.916754 0.931281 0.902795 204.0  
GSVT 0.940318 0.932316 0.948463 300.0  
SB 0.956553 0.954421 0.958698 892.0  
SR 0.947490 0.949596 0.945411 681.0  
macro avg 0.940279 0.941903 0.938842 2077.0  
micro avg 0.947372 0.947372 0.947372 2077.0  
weighted avg 0.947327 0.947373 0.947372 2077.0  
The result of Model Number:Dataset Number:Featuregroup Number:Rescale of 66 : 1 : 0 :  
0

f1-score precision recall support  
AFIB 0.870989 0.875137 0.866919 875.0  
GSVT 0.881749 0.865725 0.898468 691.0  
SB 0.932957 0.929385 0.936560 1553.0  
SR 0.905381 0.920878 0.890411 907.0  
macro avg 0.897769 0.897781 0.898090 4026.0  
micro avg 0.904490 0.904490 0.904490 4026.0  
weighted avg 0.904488 0.904752 0.904490 4026.0  
The result of Model Number:Dataset Number:Featuregroup Number:Rescale of 66 : 1 : 0 :  
1

f1-score precision recall support  
AFIB 0.686270 0.761619 0.624652 204.0  
GSVT 0.801313 0.791295 0.811745 300.0  
SB 0.852558 0.848207 0.856954 892.0  
SR 0.832585 0.820945 0.844564 681.0  
macro avg 0.793181 0.805517 0.784479 2077.0  
micro avg 0.823545 0.823545 0.823545 2077.0  
weighted avg 0.822275 0.822544 0.823545 2077.0  
The result of Model Number:Dataset Number:Featuregroup Number:Rescale of 66 : 1 : 1 :  
0

f1-score precision recall support  
AFIB 0.651766 0.650120 0.653523 875.0  
GSVT 0.664482 0.660829 0.668212 691.0  
SB 0.695765 0.691570 0.700020 1553.0  
SR 0.675251 0.687438 0.663501 907.0  
macro avg 0.671816 0.672489 0.671314 4026.0  
micro avg 0.676228 0.676228 0.676228 4026.0  
weighted avg 0.676212 0.676354 0.676228 4026.0

The result of Model Number:Dataset Number:Featuregroup Number:Rescale of 66 : 1 : 1 :  
1

|              | f1-score | precision | recall   | support |
|--------------|----------|-----------|----------|---------|
| AFIB         | 0.875189 | 0.902744  | 0.849481 | 204.0   |
| GSVT         | 0.831477 | 0.849237  | 0.814582 | 300.0   |
| SB           | 0.858518 | 0.828476  | 0.890852 | 892.0   |
| SR           | 0.784044 | 0.810542  | 0.759279 | 681.0   |
| macro avg    | 0.837307 | 0.847750  | 0.828549 | 2077.0  |
| micro avg    | 0.832633 | 0.832633  | 0.832633 | 2077.0  |
| weighted avg | 0.831831 | 0.832889  | 0.832633 | 2077.0  |

The result of Model Number:Dataset Number:Featuregroup Number:Rescale of 66 : 1 : 2 :  
0

|              | f1-score | precision | recall   | support |
|--------------|----------|-----------|----------|---------|
| AFIB         | 0.672914 | 0.745424  | 0.613799 | 204.0   |
| GSVT         | 0.793190 | 0.782071  | 0.804833 | 300.0   |
| SB           | 0.842175 | 0.839464  | 0.844913 | 892.0   |
| SR           | 0.820613 | 0.808131  | 0.833508 | 681.0   |
| macro avg    | 0.782223 | 0.793773  | 0.774263 | 2077.0  |
| micro avg    | 0.812685 | 0.812685  | 0.812685 | 2077.0  |
| weighted avg | 0.811406 | 0.811665  | 0.812685 | 2077.0  |

The result of Model Number:Dataset Number:Featuregroup Number:Rescale of 66 : 1 : 2 :  
1

|              | f1-score | precision | recall   | support |
|--------------|----------|-----------|----------|---------|
| AFIB         | 0.556566 | 0.620744  | 0.504489 | 204.0   |
| GSVT         | 0.656248 | 0.644826  | 0.668222 | 300.0   |
| SB           | 0.700671 | 0.697565  | 0.703811 | 892.0   |
| SR           | 0.684411 | 0.675052  | 0.694052 | 681.0   |
| macro avg    | 0.649474 | 0.659547  | 0.642644 | 2077.0  |
| micro avg    | 0.675894 | 0.675894  | 0.675894 | 2077.0  |
| weighted avg | 0.674769 | 0.675021  | 0.675894 | 2077.0  |

The result of Model Number:Dataset Number:Featuregroup Number:Rescale of 66 : 1 : 3 :  
0

|              | f1-score | precision | recall   | support |
|--------------|----------|-----------|----------|---------|
| AFIB         | 0.696906 | 0.709691  | 0.684628 | 204.0   |
| GSVT         | 0.706098 | 0.698972  | 0.713385 | 300.0   |
| SB           | 0.723491 | 0.719725  | 0.727301 | 892.0   |
| SR           | 0.713641 | 0.718113  | 0.709240 | 681.0   |
| macro avg    | 0.710034 | 0.711625  | 0.708638 | 2077.0  |
| micro avg    | 0.715178 | 0.715178  | 0.715178 | 2077.0  |
| weighted avg | 0.715138 | 0.715213  | 0.715178 | 2077.0  |

The result of Model Number:Dataset Number:Featuregroup Number:Rescale of 66 : 1 : 3 :  
1

|      | f1-score | precision | recall   | support |
|------|----------|-----------|----------|---------|
| AFIB | 0.752518 | 0.759797  | 0.745513 | 204.0   |

GSVT 0.779146 0.777610 0.780701 300.0  
SB 0.795431 0.794023 0.796856 892.0  
SR 0.788099 0.788480 0.787751 681.0  
macro avg 0.778798 0.779977 0.777705 2077.0  
micro avg 0.786494 0.786494 0.786494 2077.0  
weighted avg 0.786460 0.786473 0.786494 2077.0  
The result of Model Number:Dataset Number:Featuregroup Number:Rescale of 66 : 1 : 4 :  
0

f1-score precision recall support  
AFIB 0.839116 0.836691 0.841633 875.0  
GSVT 0.854669 0.853973 0.855424 691.0  
SB 0.907782 0.904022 0.911581 1553.0  
SR 0.880529 0.890203 0.871112 907.0  
macro avg 0.870524 0.871222 0.869937 4026.0  
micro avg 0.877623 0.877623 0.877623 4026.0  
weighted avg 0.877603 0.877685 0.877623 4026.0  
The result of Model Number:Dataset Number:Featuregroup Number:Rescale of 66 : 1 : 4 :  
1

f1-score precision recall support  
AFIB 0.746339 0.738092 0.754786 875.0  
GSVT 0.759786 0.764464 0.755177 691.0  
SB 0.808646 0.807301 0.810000 1553.0  
SR 0.788956 0.796333 0.781735 907.0  
macro avg 0.775932 0.776547 0.775425 4026.0  
micro avg 0.782223 0.782223 0.782223 4026.0  
weighted avg 0.782283 0.782436 0.782223 4026.0  
The result of Model Number:Dataset Number:Featuregroup Number:Rescale of 66 : 1 : 5 :  
0

f1-score precision recall support  
AFIB 0.809960 0.819430 0.800862 204.0  
GSVT 0.832241 0.828415 0.836126 300.0  
SB 0.844025 0.841400 0.846672 892.0  
SR 0.836756 0.839127 0.834433 681.0  
macro avg 0.830745 0.832093 0.829523 2077.0  
micro avg 0.836636 0.836636 0.836636 2077.0  
weighted avg 0.836593 0.836621 0.836636 2077.0  
The result of Model Number:Dataset Number:Featuregroup Number:Rescale of 66 : 1 : 5 :  
1

f1-score precision recall support  
AFIB 0.859906 0.847995 0.872190 875.0  
GSVT 0.878978 0.886091 0.871982 691.0  
SB 0.933024 0.930343 0.935727 1553.0  
SR 0.910327 0.922175 0.898788 907.0  
macro avg 0.895559 0.896651 0.894672 4026.0

micro avg 0.902655 0.902655 0.902655 4026.0  
weighted avg 0.902743 0.903011 0.902655 4026.0  
The result of Model Number:Dataset Number:Featuregroup Number:Rescale of 66 : 1 : 6 :  
0

|              | f1-score | precision | recall   | support |
|--------------|----------|-----------|----------|---------|
| AFIB         | 0.889900 | 0.918804  | 0.862934 | 204.0   |
| GSVT         | 0.914469 | 0.902809  | 0.926618 | 300.0   |
| SB           | 0.940268 | 0.936723  | 0.943851 | 892.0   |
| SR           | 0.927117 | 0.928796  | 0.925480 | 681.0   |
| macro avg    | 0.917939 | 0.921783  | 0.914721 | 2077.0  |
| micro avg    | 0.927391 | 0.927391  | 0.927391 | 2077.0  |
| weighted avg | 0.927283 | 0.927465  | 0.927391 | 2077.0  |

The result of Model Number:Dataset Number:Featuregroup Number:Rescale of 66 : 1 : 6 :  
1

|              | f1-score | precision | recall   | support |
|--------------|----------|-----------|----------|---------|
| AFIB         | 0.916113 | 0.926082  | 0.906624 | 204.0   |
| GSVT         | 0.947116 | 0.943166  | 0.951252 | 300.0   |
| SB           | 0.966524 | 0.965659  | 0.967391 | 892.0   |
| SR           | 0.957390 | 0.957398  | 0.957390 | 681.0   |
| macro avg    | 0.946786 | 0.948076  | 0.945664 | 2077.0  |
| micro avg    | 0.955812 | 0.955812  | 0.955812 | 2077.0  |
| weighted avg | 0.955774 | 0.955814  | 0.955812 | 2077.0  |

The result of Model Number:Dataset Number:Featuregroup Number:Rescale of 66 : 1 : 7 :  
0

|              | f1-score | precision | recall   | support |
|--------------|----------|-----------|----------|---------|
| AFIB         | 0.914730 | 0.926949  | 0.903087 | 204.0   |
| GSVT         | 0.930889 | 0.925219  | 0.936773 | 300.0   |
| SB           | 0.953329 | 0.952484  | 0.954182 | 892.0   |
| SR           | 0.946284 | 0.946428  | 0.946147 | 681.0   |
| macro avg    | 0.936308 | 0.937770  | 0.935047 | 2077.0  |
| micro avg    | 0.944014 | 0.944014  | 0.944014 | 2077.0  |
| weighted avg | 0.943987 | 0.944052  | 0.944014 | 2077.0  |

The result of Model Number:Dataset Number:Featuregroup Number:Rescale of 66 : 1 : 7 :  
1

|              | f1-score | precision | recall   | support |
|--------------|----------|-----------|----------|---------|
| AFIB         | 0.747756 | 0.761516  | 0.734865 | 204.0   |
| GSVT         | 0.775344 | 0.768850  | 0.782083 | 300.0   |
| SB           | 0.789903 | 0.788579  | 0.791231 | 892.0   |
| SR           | 0.782928 | 0.783624  | 0.782239 | 681.0   |
| macro avg    | 0.773983 | 0.775642  | 0.772604 | 2077.0  |
| micro avg    | 0.781425 | 0.781425  | 0.781425 | 2077.0  |
| weighted avg | 0.781374 | 0.781447  | 0.781425 | 2077.0  |

The result of Model Number:Dataset Number:Featuregroup Number:Rescale of 66 : 1 : 8 :  
0

f1-score precision recall support  
AFIB 0.826903 0.839101 0.815145 204.0  
GSVT 0.847202 0.843877 0.850581 300.0  
SB 0.866018 0.864281 0.867765 892.0  
SR 0.859875 0.860005 0.859753 681.0  
macro avg 0.850000 0.851816 0.848311 2077.0  
micro avg 0.857488 0.857488 0.857488 2077.0  
weighted avg 0.857444 0.857459 0.857488 2077.0  
The result of Model Number:Dataset Number:Featuregroup Number:Rescale of 66 : 1 : 8 :  
1

f1-score precision recall support  
AFIB 0.788162 0.812064 0.765659 875.0  
GSVT 0.841374 0.835539 0.847336 691.0  
SB 0.920565 0.917044 0.924120 1553.0  
SR 0.870633 0.857566 0.884156 907.0  
macro avg 0.855183 0.855553 0.855318 4026.0  
micro avg 0.867498 0.867498 0.867498 4026.0  
weighted avg 0.866948 0.866839 0.867498 4026.0  
The result of Model Number:Dataset Number:Featuregroup Number:Rescale of 66 : 1 : 9 :  
0

f1-score precision recall support  
AFIB 0.693779 0.727412 0.663195 204.0  
GSVT 0.722673 0.713230 0.732516 300.0  
SB 0.742137 0.736493 0.747878 892.0  
SR 0.721473 0.723629 0.719362 681.0  
macro avg 0.720015 0.725191 0.715738 2077.0  
micro avg 0.727992 0.727992 0.727992 2077.0  
weighted avg 0.727801 0.728023 0.727992 2077.0  
The result of Model Number:Dataset Number:Featuregroup Number:Rescale of 66 : 1 : 9 :  
1

f1-score precision recall support  
AFIB 0.680695 0.765381 0.613482 204.0  
GSVT 0.807594 0.790349 0.825645 300.0  
SB 0.862122 0.857727 0.866566 892.0  
SR 0.842781 0.832108 0.853785 681.0  
macro avg 0.798298 0.811391 0.789869 2077.0  
micro avg 0.831607 0.831607 0.831607 2077.0  
weighted avg 0.830085 0.830525 0.831607 2077.0  
The result of Model Number:Dataset Number:Featuregroup Number:Rescale of 66 : 1 :  
10 : 0

f1-score precision recall support  
AFIB 0.788187 0.790726 0.785738 875.0  
GSVT 0.799268 0.786579 0.812446 691.0  
SB 0.842159 0.835128 0.849316 1553.0

SR 0.799826 0.820140 0.780524 907.0  
macro avg 0.807360 0.808143 0.807006 4026.0  
micro avg 0.813672 0.813672 0.813672 4026.0  
weighted avg 0.813531 0.813768 0.813672 4026.0  
The result of Model Number:Dataset Number:Featuregroup Number:Rescale of 66 : 1 :  
10 : 1

f1-score precision recall support  
AFIB 0.726119 0.733217 0.719326 875.0  
GSVT 0.720573 0.715105 0.726361 691.0  
SB 0.762448 0.754603 0.770525 1553.0  
SR 0.738246 0.750119 0.726952 907.0  
macro avg 0.736846 0.738261 0.735791 4026.0  
micro avg 0.742001 0.742001 0.742001 4026.0  
weighted avg 0.741913 0.742166 0.742001 4026.0

The result of Model Number:Dataset Number:Featuregroup Number:Rescale of 67 : 0 : 0 :  
0

f1-score precision recall support  
AFIB 0.751800 0.776766 0.728674 204.0  
GSVT 0.780331 0.774071 0.786811 300.0  
SB 0.797571 0.794294 0.800878 892.0  
SR 0.790122 0.790007 0.790239 681.0  
macro avg 0.779956 0.783784 0.776650 2077.0  
micro avg 0.788266 0.788266 0.788266 2077.0  
weighted avg 0.788143 0.788246 0.788266 2077.0

The result of Model Number:Dataset Number:Featuregroup Number:Rescale of 67 : 0 : 0 :  
1

f1-score precision recall support  
AFIB 0.904967 0.941494 0.871241 204.0  
GSVT 0.938644 0.923396 0.954566 300.0  
SB 0.962927 0.955186 0.970807 892.0  
SR 0.937021 0.943769 0.930419 681.0  
macro avg 0.935890 0.940961 0.931758 2077.0  
micro avg 0.945440 0.945440 0.945440 2077.0  
weighted avg 0.945233 0.945506 0.945440 2077.0

The result of Model Number:Dataset Number:Featuregroup Number:Rescale of 67 : 0 : 1 :  
0

f1-score precision recall support  
AFIB 0.751817 0.751140 0.752568 875.0  
GSVT 0.764842 0.757839 0.772035 691.0  
SB 0.802610 0.795554 0.809793 1553.0  
SR 0.764824 0.783732 0.746874 907.0  
macro avg 0.771023 0.772066 0.770318 4026.0  
micro avg 0.776701 0.776701 0.776701 4026.0  
weighted avg 0.776576 0.776764 0.776701 4026.0

The result of Model Number:Dataset Number:Featuregroup Number:Rescale of 67 : 0 : 1 : 1

|              | f1-score | precision | recall   | support |
|--------------|----------|-----------|----------|---------|
| AFIB         | 0.649913 | 0.640200  | 0.659951 | 875.0   |
| GSVT         | 0.662374 | 0.668039  | 0.656815 | 691.0   |
| SB           | 0.707732 | 0.705295  | 0.710190 | 1553.0  |
| SR           | 0.687017 | 0.697264  | 0.677090 | 907.0   |
| macro avg    | 0.676759 | 0.677699  | 0.676012 | 4026.0  |
| micro avg    | 0.682653 | 0.682653  | 0.682653 | 4026.0  |
| weighted avg | 0.682714 | 0.682944  | 0.682653 | 4026.0  |

The result of Model Number:Dataset Number:Featuregroup Number:Rescale of 67 : 0 : 2 : 0

|              | f1-score | precision | recall   | support |
|--------------|----------|-----------|----------|---------|
| AFIB         | 0.885377 | 0.895011  | 0.876207 | 204.0   |
| GSVT         | 0.915339 | 0.911522  | 0.919337 | 300.0   |
| SB           | 0.934097 | 0.933261  | 0.934934 | 892.0   |
| SR           | 0.925269 | 0.925277  | 0.925269 | 681.0   |
| macro avg    | 0.915021 | 0.916268  | 0.913937 | 2077.0  |
| micro avg    | 0.923744 | 0.923744  | 0.923744 | 2077.0  |
| weighted avg | 0.923708 | 0.923747  | 0.923744 | 2077.0  |

The result of Model Number:Dataset Number:Featuregroup Number:Rescale of 67 : 0 : 2 : 1

|              | f1-score | precision | recall   | support |
|--------------|----------|-----------|----------|---------|
| AFIB         | 0.777287 | 0.766877  | 0.788033 | 875.0   |
| GSVT         | 0.794666 | 0.800869  | 0.788572 | 691.0   |
| SB           | 0.843714 | 0.841074  | 0.846375 | 1553.0  |
| SR           | 0.823311 | 0.834225  | 0.812692 | 907.0   |
| macro avg    | 0.809744 | 0.810761  | 0.808918 | 4026.0  |
| micro avg    | 0.816186 | 0.816186  | 0.816186 | 4026.0  |
| weighted avg | 0.816262 | 0.816505  | 0.816186 | 4026.0  |

The result of Model Number:Dataset Number:Featuregroup Number:Rescale of 67 : 0 : 3 : 0

|              | f1-score | precision | recall   | support |
|--------------|----------|-----------|----------|---------|
| AFIB         | 0.790103 | 0.797212  | 0.783367 | 875.0   |
| GSVT         | 0.806197 | 0.789851  | 0.823425 | 691.0   |
| SB           | 0.854978 | 0.845466  | 0.864808 | 1553.0  |
| SR           | 0.821051 | 0.845457  | 0.798207 | 907.0   |
| macro avg    | 0.818082 | 0.819496  | 0.817452 | 4026.0  |
| micro avg    | 0.825001 | 0.825001  | 0.825001 | 4026.0  |
| weighted avg | 0.824862 | 0.825431  | 0.825001 | 4026.0  |

The result of Model Number:Dataset Number:Featuregroup Number:Rescale of 67 : 0 : 3 : 1

|      | f1-score | precision | recall   | support |
|------|----------|-----------|----------|---------|
| AFIB | 0.723838 | 0.727811  | 0.719955 | 875.0   |



GSVT 0.724850 0.715686 0.734366 691.0  
SB 0.762306 0.759247 0.765396 1553.0  
SR 0.745941 0.754997 0.737147 907.0  
macro avg 0.739234 0.739435 0.739216 4026.0  
micro avg 0.743830 0.743830 0.743830 4026.0  
weighted avg 0.743830 0.743981 0.743830 4026.0  
The result of Model Number:Dataset Number:Featuregroup Number:Rescale of 67 : 0 : 4 :  
0

f1-score precision recall support

AFIB 0.733412 0.735562 0.731331 875.0  
GSVT 0.745547 0.735972 0.755472 691.0  
SB 0.789038 0.787120 0.790968 1553.0  
SR 0.769058 0.778185 0.760151 907.0  
macro avg 0.759264 0.759210 0.759480 4026.0  
micro avg 0.764972 0.764972 0.764972 4026.0  
weighted avg 0.764983 0.765123 0.764972 4026.0  
The result of Model Number:Dataset Number:Featuregroup Number:Rescale of 67 : 0 : 4 :  
1

f1-score precision recall support

AFIB 0.846867 0.858318 0.836071 204.0  
GSVT 0.879034 0.877607 0.880496 300.0  
SB 0.898123 0.896927 0.899331 892.0  
SR 0.888943 0.887804 0.890116 681.0  
macro avg 0.878242 0.880164 0.876504 2077.0  
micro avg 0.887376 0.887376 0.887376 2077.0  
weighted avg 0.887322 0.887353 0.887376 2077.0  
The result of Model Number:Dataset Number:Featuregroup Number:Rescale of 67 : 0 : 5 :  
0

f1-score precision recall support

AFIB 0.662443 0.679948 0.645882 204.0  
GSVT 0.680610 0.674956 0.686484 300.0  
SB 0.699365 0.696798 0.701952 892.0  
SR 0.688536 0.689370 0.687722 681.0  
macro avg 0.682738 0.685268 0.680510 2077.0  
micro avg 0.689545 0.689545 0.689545 2077.0  
weighted avg 0.689479 0.689553 0.689545 2077.0  
The result of Model Number:Dataset Number:Featuregroup Number:Rescale of 67 : 0 : 5 :  
1

f1-score precision recall support

AFIB 0.740200 0.719670 0.764265 875.0  
GSVT 0.749863 0.781448 0.725346 691.0  
SB 0.823750 0.823334 0.824178 1553.0  
SR 0.803085 0.808110 0.798127 907.0  
macro avg 0.779224 0.783141 0.777979 4026.0

micro avg 0.788325 0.788325 0.788325 4026.0  
weighted avg 0.788254 0.790185 0.788325 4026.0  
The result of Model Number:Dataset Number:Featuregroup Number:Rescale of 67 : 0 : 6 :  
0

|              | f1-score | precision | recall   | support |
|--------------|----------|-----------|----------|---------|
| AFIB         | 0.682362 | 0.706051  | 0.660303 | 204.0   |
| GSVT         | 0.695446 | 0.687833  | 0.703315 | 300.0   |
| SB           | 0.713960 | 0.708833  | 0.719162 | 892.0   |
| SR           | 0.701209 | 0.704657  | 0.697807 | 681.0   |
| macro avg    | 0.698244 | 0.701843  | 0.695147 | 2077.0  |
| micro avg    | 0.704090 | 0.704090  | 0.704090 | 2077.0  |
| weighted avg | 0.704001 | 0.704157  | 0.704090 | 2077.0  |

The result of Model Number:Dataset Number:Featuregroup Number:Rescale of 67 : 0 : 6 :  
1

|              | f1-score | precision | recall   | support |
|--------------|----------|-----------|----------|---------|
| AFIB         | 0.811421 | 0.815442  | 0.807526 | 875.0   |
| GSVT         | 0.819500 | 0.820681  | 0.818447 | 691.0   |
| SB           | 0.862634 | 0.858632  | 0.866683 | 1553.0  |
| SR           | 0.846754 | 0.848875  | 0.844691 | 907.0   |
| macro avg    | 0.835077 | 0.835907  | 0.834337 | 4026.0  |
| micro avg    | 0.840593 | 0.840593  | 0.840593 | 4026.0  |
| weighted avg | 0.840523 | 0.840533  | 0.840593 | 4026.0  |

The result of Model Number:Dataset Number:Featuregroup Number:Rescale of 67 : 0 : 7 :  
0

|              | f1-score | precision | recall   | support |
|--------------|----------|-----------|----------|---------|
| AFIB         | 0.874232 | 0.881078  | 0.867537 | 875.0   |
| GSVT         | 0.876538 | 0.865351  | 0.888071 | 691.0   |
| SB           | 0.919389 | 0.915701  | 0.923116 | 1553.0  |
| SR           | 0.899965 | 0.908799  | 0.891334 | 907.0   |
| macro avg    | 0.892531 | 0.892732  | 0.892514 | 4026.0  |
| micro avg    | 0.897862 | 0.897862  | 0.897862 | 4026.0  |
| weighted avg | 0.897844 | 0.897980  | 0.897862 | 4026.0  |

The result of Model Number:Dataset Number:Featuregroup Number:Rescale of 67 : 0 : 7 :  
1

|              | f1-score | precision | recall   | support |
|--------------|----------|-----------|----------|---------|
| AFIB         | 0.822531 | 0.829932  | 0.815519 | 875.0   |
| GSVT         | 0.839286 | 0.822268  | 0.857221 | 691.0   |
| SB           | 0.890068 | 0.880167  | 0.900303 | 1553.0  |
| SR           | 0.854749 | 0.880157  | 0.830968 | 907.0   |
| macro avg    | 0.851659 | 0.853131  | 0.851003 | 4026.0  |
| micro avg    | 0.858862 | 0.858862  | 0.858862 | 4026.0  |
| weighted avg | 0.858717 | 0.859309  | 0.858862 | 4026.0  |

The result of Model Number:Dataset Number:Featuregroup Number:Rescale of 67 : 0 : 8 :  
0

f1-score precision recall support  
AFIB 0.704671 0.708012 0.701367 875.0  
GSVT 0.713413 0.710047 0.716827 691.0  
SB 0.752484 0.750895 0.754083 1553.0  
SR 0.738224 0.740291 0.736186 907.0  
macro avg 0.727198 0.727311 0.727116 4026.0  
micro avg 0.732199 0.732199 0.732199 4026.0  
weighted avg 0.732174 0.732175 0.732199 4026.0  
The result of Model Number:Dataset Number:Featuregroup Number:Rescale of 67 : 0 : 8 :  
1

f1-score precision recall support  
AFIB 0.889886 0.911240 0.869914 204.0  
GSVT 0.921528 0.916187 0.927043 300.0  
SB 0.941209 0.937756 0.944690 892.0  
SR 0.933030 0.933722 0.932349 681.0  
macro avg 0.921413 0.924726 0.918499 2077.0  
micro avg 0.930750 0.930750 0.930750 2077.0  
weighted avg 0.930644 0.930714 0.930750 2077.0  
The result of Model Number:Dataset Number:Featuregroup Number:Rescale of 67 : 0 : 9 :  
0

f1-score precision recall support  
AFIB 0.883192 0.890174 0.876348 875.0  
GSVT 0.905416 0.903501 0.907372 691.0  
SB 0.965200 0.956668 0.973896 1553.0  
SR 0.939505 0.948719 0.930490 907.0  
macro avg 0.923328 0.924766 0.922027 4026.0  
micro avg 0.931499 0.931499 0.931499 4026.0  
weighted avg 0.931326 0.931300 0.931499 4026.0  
The result of Model Number:Dataset Number:Featuregroup Number:Rescale of 67 : 0 : 9 :  
1

f1-score precision recall support  
AFIB 0.855108 0.843230 0.867407 875.0  
GSVT 0.885665 0.897480 0.874272 691.0  
SB 0.940864 0.938936 0.942803 1553.0  
SR 0.916376 0.923457 0.909404 907.0  
macro avg 0.899503 0.900776 0.898471 4026.0  
micro avg 0.907130 0.907130 0.907130 4026.0  
weighted avg 0.907235 0.907533 0.907130 4026.0  
The result of Model Number:Dataset Number:Featuregroup Number:Rescale of 67 : 0 :  
10 : 0

f1-score precision recall support  
AFIB 0.872804 0.880761 0.865104 204.0  
GSVT 0.895582 0.892649 0.898561 300.0  
SB 0.911954 0.911346 0.912566 892.0

SR 0.903933 0.903673 0.904206 681.0  
macro avg 0.896068 0.897107 0.895109 2077.0  
micro avg 0.903140 0.903140 0.903140 2077.0  
weighted avg 0.903114 0.903126 0.903140 2077.0  
The result of Model Number:Dataset Number:Featuregroup Number:Rescale of 67 : 0 :  
10 : 1

f1-score precision recall support  
AFIB 0.701320 0.715637 0.687875 204.0  
GSVT 0.726786 0.720472 0.733345 300.0  
SB 0.740760 0.739437 0.742088 892.0  
SR 0.733865 0.734302 0.733432 681.0  
macro avg 0.725683 0.727462 0.724185 2077.0  
micro avg 0.732663 0.732663 0.732663 2077.0  
weighted avg 0.732607 0.732677 0.732663 2077.0  
The result of Model Number:Dataset Number:Featuregroup Number:Rescale of 67 : 1 : 0 :  
0

f1-score precision recall support  
AFIB 0.643616 0.634676 0.652873 875.0  
GSVT 0.666616 0.675509 0.658041 691.0  
SB 0.708162 0.706712 0.709622 1553.0  
SR 0.689731 0.695061 0.684484 907.0  
macro avg 0.677031 0.677989 0.676255 4026.0  
micro avg 0.682772 0.682772 0.682772 4026.0  
weighted avg 0.682851 0.683075 0.682772 4026.0  
The result of Model Number:Dataset Number:Featuregroup Number:Rescale of 67 : 1 : 0 :  
1

f1-score precision recall support  
AFIB 0.825979 0.814917 0.837398 875.0  
GSVT 0.844446 0.851037 0.837971 691.0  
SB 0.896566 0.893761 0.899394 1553.0  
SR 0.874885 0.886483 0.863602 907.0  
macro avg 0.860469 0.861550 0.859591 4026.0  
micro avg 0.867314 0.867314 0.867314 4026.0  
weighted avg 0.867395 0.867653 0.867314 4026.0  
The result of Model Number:Dataset Number:Featuregroup Number:Rescale of 67 : 1 : 1 :  
0

f1-score precision recall support  
AFIB 0.844877 0.858265 0.832012 204.0  
GSVT 0.866594 0.859219 0.874100 300.0  
SB 0.881555 0.879591 0.883532 892.0  
SR 0.873203 0.875144 0.871287 681.0  
macro avg 0.866557 0.868055 0.865233 2077.0  
micro avg 0.873095 0.873095 0.873095 2077.0  
weighted avg 0.873053 0.873096 0.873095 2077.0

The result of Model Number:Dataset Number:Featuregroup Number:Rescale of 67 : 1 : 1 : 1

|              | f1-score | precision | recall   | support |
|--------------|----------|-----------|----------|---------|
| AFIB         | 0.695490 | 0.698802  | 0.692240 | 875.0   |
| GSVT         | 0.704081 | 0.691286  | 0.717431 | 691.0   |
| SB           | 0.744971 | 0.742119  | 0.747848 | 1553.0  |
| SR           | 0.722952 | 0.735326  | 0.710998 | 907.0   |
| macro avg    | 0.716873 | 0.716883  | 0.717129 | 4026.0  |
| micro avg    | 0.722240 | 0.722240  | 0.722240 | 4026.0  |
| weighted avg | 0.722238 | 0.722449  | 0.722240 | 4026.0  |

The result of Model Number:Dataset Number:Featuregroup Number:Rescale of 67 : 1 : 2 : 0

|              | f1-score | precision | recall   | support |
|--------------|----------|-----------|----------|---------|
| AFIB         | 0.700170 | 0.692606  | 0.797027 | 204.0   |
| GSVT         | 0.837708 | 0.831182  | 0.844411 | 300.0   |
| SB           | 0.683650 | 0.682220  | 0.685087 | 892.0   |
| SR           | 0.847741 | 0.847504  | 0.847990 | 681.0   |
| macro avg    | 0.767318 | 0.763378  | 0.793629 | 2077.0  |
| micro avg    | 0.772506 | 0.772506  | 0.772506 | 2077.0  |
| weighted avg | 0.761326 | 0.758949  | 0.772506 | 2077.0  |

The result of Model Number:Dataset Number:Featuregroup Number:Rescale of 67 : 1 : 2 : 1

|              | f1-score | precision | recall   | support |
|--------------|----------|-----------|----------|---------|
| AFIB         | 0.741581 | 0.759210  | 0.724835 | 204.0   |
| GSVT         | 0.760833 | 0.757897  | 0.763872 | 300.0   |
| SB           | 0.779687 | 0.777947  | 0.781435 | 892.0   |
| SR           | 0.769877 | 0.768329  | 0.771460 | 681.0   |
| macro avg    | 0.762995 | 0.765846  | 0.760401 | 2077.0  |
| micro avg    | 0.770068 | 0.770068  | 0.770068 | 2077.0  |
| weighted avg | 0.770005 | 0.770057  | 0.770068 | 2077.0  |

The result of Model Number:Dataset Number:Featuregroup Number:Rescale of 67 : 1 : 3 : 0

|              | f1-score | precision | recall   | support |
|--------------|----------|-----------|----------|---------|
| AFIB         | 0.833668 | 0.844803  | 0.823057 | 204.0   |
| GSVT         | 0.848395 | 0.843227  | 0.853757 | 300.0   |
| SB           | 0.868846 | 0.868076  | 0.869624 | 892.0   |
| SR           | 0.862426 | 0.862557  | 0.862301 | 681.0   |
| macro avg    | 0.853334 | 0.854666  | 0.852185 | 2077.0  |
| micro avg    | 0.860357 | 0.860357  | 0.860357 | 2077.0  |
| weighted avg | 0.860332 | 0.860391  | 0.860357 | 2077.0  |

The result of Model Number:Dataset Number:Featuregroup Number:Rescale of 67 : 1 : 3 : 1

|      | f1-score | precision | recall   | support |
|------|----------|-----------|----------|---------|
| AFIB | 0.725102 | 0.725749  | 0.724531 | 875.0   |

GSVT 0.738384 0.740321 0.736581 691.0  
SB 0.783804 0.778586 0.789101 1553.0  
SR 0.768533 0.775549 0.761669 907.0  
macro avg 0.753956 0.755051 0.752971 4026.0  
micro avg 0.759873 0.759873 0.759873 4026.0  
weighted avg 0.759810 0.759851 0.759873 4026.0  
The result of Model Number:Dataset Number:Featuregroup Number:Rescale of 67 : 1 : 4 :  
0

f1-score precision recall support

AFIB 0.855765 0.860006 0.851657 875.0  
GSVT 0.864285 0.865531 0.863175 691.0  
SB 0.909777 0.905556 0.914047 1553.0  
SR 0.893029 0.895266 0.890853 907.0  
macro avg 0.880714 0.881589 0.879933 4026.0  
micro avg 0.886531 0.886531 0.886531 4026.0  
weighted avg 0.886457 0.886468 0.886531 4026.0

The result of Model Number:Dataset Number:Featuregroup Number:Rescale of 67 : 1 : 4 :  
1

f1-score precision recall support

AFIB 0.698267 0.712913 0.684229 204.0  
GSVT 0.714465 0.710238 0.718750 300.0  
SB 0.731883 0.730169 0.733606 892.0  
SR 0.725701 0.725493 0.725917 681.0  
macro avg 0.717579 0.719703 0.715626 2077.0  
micro avg 0.724089 0.724089 0.724089 2077.0  
weighted avg 0.724039 0.724062 0.724089 2077.0

The result of Model Number:Dataset Number:Featuregroup Number:Rescale of 67 : 1 : 5 :  
0

f1-score precision recall support

AFIB 0.676034 0.679384 0.672789 875.0  
GSVT 0.682765 0.683748 0.681887 691.0  
SB 0.718702 0.715367 0.722076 1553.0  
SR 0.705472 0.707238 0.703753 907.0  
macro avg 0.695743 0.696435 0.695126 4026.0  
micro avg 0.700338 0.700338 0.700338 4026.0  
weighted avg 0.700280 0.700289 0.700338 4026.0

The result of Model Number:Dataset Number:Featuregroup Number:Rescale of 67 : 1 : 5 :  
1

f1-score precision recall support

AFIB 0.742284 0.770550 0.716181 204.0  
GSVT 0.765933 0.758214 0.773846 300.0  
SB 0.781264 0.777375 0.785204 892.0  
SR 0.771827 0.772313 0.771367 681.0  
macro avg 0.765327 0.769613 0.761649 2077.0

micro avg 0.772247 0.772247 0.772247 2077.0  
weighted avg 0.772127 0.772277 0.772247 2077.0  
The result of Model Number:Dataset Number:Featuregroup Number:Rescale of 67 : 1 : 6 :  
0

|              | f1-score | precision | recall   | support |
|--------------|----------|-----------|----------|---------|
| AFIB         | 0.583707 | 0.635858  | 0.616408 | 204.0   |
| GSVT         | 0.792837 | 0.779876  | 0.806509 | 300.0   |
| SB           | 0.674949 | 0.669808  | 0.680220 | 892.0   |
| SR           | 0.825352 | 0.816014  | 0.834932 | 681.0   |
| macro avg    | 0.719211 | 0.725389  | 0.734517 | 2077.0  |
| micro avg    | 0.742920 | 0.742920  | 0.742920 | 2077.0  |
| weighted avg | 0.732329 | 0.730309  | 0.742920 | 2077.0  |

The result of Model Number:Dataset Number:Featuregroup Number:Rescale of 67 : 1 : 6 :  
1

|              | f1-score | precision | recall   | support |
|--------------|----------|-----------|----------|---------|
| AFIB         | 0.788545 | 0.784130  | 0.793048 | 875.0   |
| GSVT         | 0.794966 | 0.799657  | 0.790380 | 691.0   |
| SB           | 0.837432 | 0.834811  | 0.840072 | 1553.0  |
| SR           | 0.820853 | 0.826283  | 0.815512 | 907.0   |
| macro avg    | 0.810449 | 0.811220  | 0.809753 | 4026.0  |
| micro avg    | 0.815790 | 0.815790  | 0.815790 | 4026.0  |
| weighted avg | 0.815783 | 0.815841  | 0.815790 | 4026.0  |

The result of Model Number:Dataset Number:Featuregroup Number:Rescale of 67 : 1 : 7 :  
0

|              | f1-score | precision | recall   | support |
|--------------|----------|-----------|----------|---------|
| AFIB         | 0.656471 | 0.732169  | 0.595045 | 204.0   |
| GSVT         | 0.774046 | 0.760574  | 0.788170 | 300.0   |
| SB           | 0.826443 | 0.822779  | 0.830147 | 892.0   |
| SR           | 0.807264 | 0.796226  | 0.818636 | 681.0   |
| macro avg    | 0.766056 | 0.777937  | 0.758000 | 2077.0  |
| micro avg    | 0.797218 | 0.797218  | 0.797218 | 2077.0  |
| weighted avg | 0.795892 | 0.796189  | 0.797218 | 2077.0  |

The result of Model Number:Dataset Number:Featuregroup Number:Rescale of 67 : 1 : 7 :  
1

|              | f1-score | precision | recall   | support |
|--------------|----------|-----------|----------|---------|
| AFIB         | 0.746043 | 0.740487  | 0.751758 | 875.0   |
| GSVT         | 0.759957 | 0.762671  | 0.757308 | 691.0   |
| SB           | 0.806408 | 0.804497  | 0.808329 | 1553.0  |
| SR           | 0.788005 | 0.795099  | 0.781064 | 907.0   |
| macro avg    | 0.775103 | 0.775689  | 0.774615 | 4026.0  |
| micro avg    | 0.781135 | 0.781135  | 0.781135 | 4026.0  |
| weighted avg | 0.781170 | 0.781289  | 0.781135 | 4026.0  |

The result of Model Number:Dataset Number:Featuregroup Number:Rescale of 67 : 1 : 8 :  
0

f1-score precision recall support  
AFIB 0.817006 0.833974 0.800902 875.0  
GSVT 0.796743 0.769071 0.861780 691.0  
SB 0.939086 0.934852 0.943375 1553.0  
SR 0.713938 0.702411 0.725913 907.0  
macro avg 0.816693 0.810077 0.832993 4026.0  
micro avg 0.849415 0.849415 0.849415 4026.0  
weighted avg 0.837400 0.832108 0.849415 4026.0  
The result of Model Number:Dataset Number:Featuregroup Number:Rescale of 67 : 1 : 8 :  
1

f1-score precision recall support  
AFIB 0.653490 0.640471 0.667081 875.0  
GSVT 0.531883 0.494623 0.666700 691.0  
SB 0.431564 0.432308 0.430823 1553.0  
SR 0.699621 0.705781 0.693596 907.0  
macro avg 0.579139 0.568296 0.614550 4026.0  
micro avg 0.581854 0.581854 0.581854 4026.0  
weighted avg 0.557404 0.549855 0.581854 4026.0  
The result of Model Number:Dataset Number:Featuregroup Number:Rescale of 67 : 1 : 9 :  
0

f1-score precision recall support  
AFIB 0.748687 0.767968 0.730381 204.0  
GSVT 0.687051 0.656468 0.775337 300.0  
SB 0.788246 0.786402 0.790101 892.0  
SR 0.625331 0.625448 0.625221 681.0  
macro avg 0.712329 0.709072 0.730260 2077.0  
micro avg 0.728042 0.728042 0.728042 2077.0  
weighted avg 0.716328 0.713051 0.728042 2077.0  
The result of Model Number:Dataset Number:Featuregroup Number:Rescale of 67 : 1 : 9 :  
1

f1-score precision recall support  
AFIB 0.856614 0.832855 0.884464 875.0  
GSVT 0.867796 0.904349 0.839423 691.0  
SB 0.953304 0.952823 0.953799 1553.0  
SR 0.929389 0.935205 0.923651 907.0  
macro avg 0.901776 0.906308 0.900334 4026.0  
micro avg 0.912307 0.912307 0.912307 4026.0  
weighted avg 0.912226 0.914460 0.912307 4026.0  
The result of Model Number:Dataset Number:Featuregroup Number:Rescale of 67 : 1 :  
10 : 0

f1-score precision recall support  
AFIB 0.669116 0.670169 0.668152 204.0  
GSVT 0.685298 0.684229 0.686428 300.0  
SB 0.699435 0.698582 0.700296 892.0



SR 0.694537 0.695870 0.693212 681.0  
macro avg 0.687096 0.687212 0.687022 2077.0  
micro avg 0.692813 0.692813 0.692813 2077.0  
weighted avg 0.692809 0.692829 0.692813 2077.0  
The result of Model Number:Dataset Number:Featuregroup Number:Rescale of 67 : 1 :  
10 : 1

f1-score precision recall support  
AFIB 0.726406 0.744495 0.709211 875.0  
GSVT 0.767501 0.770759 0.764302 691.0  
SB 0.832494 0.829308 0.835709 1553.0  
SR 0.791885 0.777128 0.807254 907.0  
macro avg 0.779571 0.780423 0.779119 4026.0  
micro avg 0.789550 0.789550 0.789550 4026.0  
weighted avg 0.789133 0.789071 0.789550 4026.0

The result of Model Number:Dataset Number:Featuregroup Number:Rescale of 68 : 0 : 0 :  
0

f1-score precision recall support  
AFIB 0.890515 0.903598 0.877887 204.0  
GSVT 0.913078 0.905315 0.920993 300.0  
SB 0.928858 0.925142 0.932607 892.0  
SR 0.919672 0.924186 0.915212 681.0  
macro avg 0.913031 0.914560 0.911675 2077.0  
micro avg 0.919851 0.919851 0.919851 2077.0  
weighted avg 0.919801 0.919849 0.919851 2077.0

The result of Model Number:Dataset Number:Featuregroup Number:Rescale of 68 : 0 : 0 :  
1

f1-score precision recall support  
AFIB 0.737558 0.772969 0.705397 204.0  
GSVT 0.769639 0.763104 0.776308 300.0  
SB 0.781734 0.776041 0.787516 892.0  
SR 0.773511 0.773869 0.773176 681.0  
macro avg 0.765610 0.771496 0.760599 2077.0  
micro avg 0.773130 0.773130 0.773130 2077.0  
weighted avg 0.772952 0.773159 0.773130 2077.0

The result of Model Number:Dataset Number:Featuregroup Number:Rescale of 68 : 0 : 1 :  
0

f1-score precision recall support  
AFIB 0.775086 0.860187 0.705494 204.0  
GSVT 0.905018 0.893704 0.916800 300.0  
SB 0.962895 0.957981 0.967860 892.0  
SR 0.940338 0.927191 0.953867 681.0  
macro avg 0.895834 0.909766 0.886005 2077.0  
micro avg 0.930128 0.930128 0.930128 2077.0  
weighted avg 0.928693 0.928997 0.930128 2077.0

The result of Model Number:Dataset Number:Featuregroup Number:Rescale of 68 : 0 : 1 :  
1

|              | f1-score | precision | recall   | support |
|--------------|----------|-----------|----------|---------|
| AFIB         | 0.653156 | 0.646863  | 0.659673 | 875.0   |
| GSVT         | 0.670268 | 0.672186  | 0.668432 | 691.0   |
| SB           | 0.712611 | 0.710972  | 0.714262 | 1553.0  |
| SR           | 0.692565 | 0.700714  | 0.684618 | 907.0   |
| macro avg    | 0.682150 | 0.682684  | 0.681746 | 4026.0  |
| micro avg    | 0.687853 | 0.687853  | 0.687853 | 4026.0  |
| weighted avg | 0.687905 | 0.688071  | 0.687853 | 4026.0  |

The result of Model Number:Dataset Number:Featuregroup Number:Rescale of 68 : 0 : 2 :  
0

|              | f1-score | precision | recall   | support |
|--------------|----------|-----------|----------|---------|
| AFIB         | 0.832807 | 0.810929  | 0.884943 | 875.0   |
| GSVT         | 0.801152 | 0.758300  | 0.913297 | 691.0   |
| SB           | 0.759133 | 0.754336  | 0.764015 | 1553.0  |
| SR           | 0.737378 | 0.750082  | 0.725302 | 907.0   |
| macro avg    | 0.782617 | 0.768412  | 0.821889 | 4026.0  |
| micro avg    | 0.807197 | 0.807197  | 0.807197 | 4026.0  |
| weighted avg | 0.777456 | 0.766358  | 0.807197 | 4026.0  |

The result of Model Number:Dataset Number:Featuregroup Number:Rescale of 68 : 0 : 2 :  
1

|              | f1-score | precision | recall   | support |
|--------------|----------|-----------|----------|---------|
| AFIB         | 0.681815 | 0.688005  | 0.676085 | 204.0   |
| GSVT         | 0.704349 | 0.700092  | 0.708842 | 300.0   |
| SB           | 0.719085 | 0.718121  | 0.720052 | 892.0   |
| SR           | 0.712431 | 0.713909  | 0.710965 | 681.0   |
| macro avg    | 0.704420 | 0.705032  | 0.703986 | 2077.0  |
| micro avg    | 0.711135 | 0.711135  | 0.711135 | 2077.0  |
| weighted avg | 0.711114 | 0.711178  | 0.711135 | 2077.0  |

The result of Model Number:Dataset Number:Featuregroup Number:Rescale of 68 : 0 : 3 :  
0

|              | f1-score | precision | recall   | support |
|--------------|----------|-----------|----------|---------|
| AFIB         | 0.725621 | 0.724453  | 0.727088 | 875.0   |
| GSVT         | 0.742539 | 0.738668  | 0.746493 | 691.0   |
| SB           | 0.776363 | 0.769786  | 0.783060 | 1553.0  |
| SR           | 0.746726 | 0.763327  | 0.731084 | 907.0   |
| macro avg    | 0.747812 | 0.749059  | 0.746931 | 4026.0  |
| micro avg    | 0.752910 | 0.752910  | 0.752910 | 4026.0  |
| weighted avg | 0.752853 | 0.753137  | 0.752910 | 4026.0  |

The result of Model Number:Dataset Number:Featuregroup Number:Rescale of 68 : 0 : 3 :  
1

|      | f1-score | precision | recall   | support |
|------|----------|-----------|----------|---------|
| AFIB | 0.724409 | 0.724047  | 0.724802 | 875.0   |

GSVT 0.733420 0.738327 0.728636 691.0  
SB 0.777525 0.775739 0.779325 1553.0  
SR 0.755005 0.754826 0.755315 907.0  
macro avg 0.747590 0.748235 0.747020 4026.0  
micro avg 0.753366 0.753366 0.753366 4026.0  
weighted avg 0.753338 0.753372 0.753366 4026.0  
The result of Model Number:Dataset Number:Featuregroup Number:Rescale of 68 : 0 : 4 :  
0

f1-score precision recall support  
AFIB 0.856359 0.872070 0.841271 204.0  
GSVT 0.867654 0.858898 0.876608 300.0  
SB 0.889026 0.884399 0.893709 892.0  
SR 0.876923 0.882418 0.871515 681.0  
macro avg 0.872491 0.874446 0.870776 2077.0  
micro avg 0.878812 0.878812 0.878812 2077.0  
weighted avg 0.878763 0.878855 0.878812 2077.0  
The result of Model Number:Dataset Number:Featuregroup Number:Rescale of 68 : 0 : 4 :  
1

f1-score precision recall support  
AFIB 0.826181 0.823792 0.828659 875.0  
GSVT 0.841493 0.840809 0.842237 691.0  
SB 0.893788 0.890086 0.897528 1553.0  
SR 0.866955 0.876479 0.857682 907.0  
macro avg 0.857104 0.857791 0.856526 4026.0  
micro avg 0.864094 0.864094 0.864094 4026.0  
weighted avg 0.864074 0.864155 0.864094 4026.0  
The result of Model Number:Dataset Number:Featuregroup Number:Rescale of 68 : 0 : 5 :  
0

f1-score precision recall support  
AFIB 0.781251 0.792311 0.771137 204.0  
GSVT 0.797471 0.782788 0.812862 300.0  
SB 0.814468 0.805463 0.823691 892.0  
SR 0.797352 0.813591 0.781795 681.0  
macro avg 0.797636 0.798538 0.797371 2077.0  
micro avg 0.803228 0.803228 0.803228 2077.0  
weighted avg 0.803139 0.803561 0.803228 2077.0  
The result of Model Number:Dataset Number:Featuregroup Number:Rescale of 68 : 0 : 5 :  
1

f1-score precision recall support  
AFIB 0.784852 0.809026 0.762239 204.0  
GSVT 0.804875 0.795022 0.815063 300.0  
SB 0.826737 0.821824 0.831736 892.0  
SR 0.812801 0.816810 0.808863 681.0  
macro avg 0.807316 0.810671 0.804475 2077.0

micro avg 0.815002 0.815002 0.815002 2077.0  
weighted avg 0.814896 0.815052 0.815002 2077.0  
The result of Model Number:Dataset Number:Featuregroup Number:Rescale of 68 : 0 : 6 :  
0

|              | f1-score | precision | recall   | support |
|--------------|----------|-----------|----------|---------|
| AFIB         | 0.827039 | 0.809272  | 0.845648 | 875.0   |
| GSVT         | 0.856486 | 0.868907  | 0.844472 | 691.0   |
| SB           | 0.911763 | 0.911590  | 0.911940 | 1553.0  |
| SR           | 0.888912 | 0.899243  | 0.878819 | 907.0   |
| macro avg    | 0.871050 | 0.872253  | 0.870220 | 4026.0  |
| micro avg    | 0.878491 | 0.878491  | 0.878491 | 4026.0  |
| weighted avg | 0.878714 | 0.879245  | 0.878491 | 4026.0  |

The result of Model Number:Dataset Number:Featuregroup Number:Rescale of 68 : 0 : 6 :  
1

|              | f1-score | precision | recall   | support |
|--------------|----------|-----------|----------|---------|
| AFIB         | 0.920335 | 0.927217  | 0.913589 | 204.0   |
| GSVT         | 0.943851 | 0.938870  | 0.948886 | 300.0   |
| SB           | 0.959779 | 0.958496  | 0.961069 | 892.0   |
| SR           | 0.951326 | 0.953150  | 0.949511 | 681.0   |
| macro avg    | 0.943823 | 0.944433  | 0.943264 | 2077.0  |
| micro avg    | 0.950857 | 0.950857  | 0.950857 | 2077.0  |
| weighted avg | 0.950833 | 0.950836  | 0.950857 | 2077.0  |

The result of Model Number:Dataset Number:Featuregroup Number:Rescale of 68 : 0 : 7 :  
0

|              | f1-score | precision | recall   | support |
|--------------|----------|-----------|----------|---------|
| AFIB         | 0.631807 | 0.696749  | 0.578327 | 204.0   |
| GSVT         | 0.751832 | 0.741671  | 0.762349 | 300.0   |
| SB           | 0.800647 | 0.797445  | 0.803878 | 892.0   |
| SR           | 0.778916 | 0.768387  | 0.789772 | 681.0   |
| macro avg    | 0.740801 | 0.751063  | 0.733582 | 2077.0  |
| micro avg    | 0.771101 | 0.771101  | 0.771101 | 2077.0  |
| weighted avg | 0.769888 | 0.769972  | 0.771101 | 2077.0  |

The result of Model Number:Dataset Number:Featuregroup Number:Rescale of 68 : 0 : 7 :  
1

|              | f1-score | precision | recall   | support |
|--------------|----------|-----------|----------|---------|
| AFIB         | 0.760969 | 0.762900  | 0.759074 | 875.0   |
| GSVT         | 0.774397 | 0.766009  | 0.783004 | 691.0   |
| SB           | 0.816172 | 0.806940  | 0.825631 | 1553.0  |
| SR           | 0.778855 | 0.800178  | 0.758671 | 907.0   |
| macro avg    | 0.782598 | 0.784007  | 0.781595 | 4026.0  |
| micro avg    | 0.788764 | 0.788764  | 0.788764 | 4026.0  |
| weighted avg | 0.788598 | 0.788820  | 0.788764 | 4026.0  |

The result of Model Number:Dataset Number:Featuregroup Number:Rescale of 68 : 0 : 8 :  
0

f1-score precision recall support  
AFIB 0.794726 0.815532 0.775318 204.0  
GSVT 0.747782 0.769515 0.727650 300.0  
SB 0.789070 0.761289 0.818971 892.0  
SR 0.715196 0.738487 0.693472 681.0  
macro avg 0.761693 0.771206 0.753853 2077.0  
micro avg 0.760345 0.760345 0.760345 2077.0  
weighted avg 0.759440 0.760329 0.760345 2077.0  
The result of Model Number:Dataset Number:Featuregroup Number:Rescale of 68 : 0 : 8 :  
1

f1-score precision recall support  
AFIB 0.760543 0.777486 0.744542 204.0  
GSVT 0.769926 0.758650 0.781864 300.0  
SB 0.787325 0.779500 0.795342 892.0  
SR 0.772802 0.783901 0.762035 681.0  
macro avg 0.772649 0.774884 0.770946 2077.0  
micro avg 0.777485 0.777485 0.777485 2077.0  
weighted avg 0.777420 0.777734 0.777485 2077.0  
The result of Model Number:Dataset Number:Featuregroup Number:Rescale of 68 : 0 : 9 :  
0

f1-score precision recall support  
AFIB 0.740308 0.718182 0.789361 875.0  
GSVT 0.633965 0.620082 0.648718 691.0  
SB 0.840879 0.834027 0.848067 1553.0  
SR 0.788865 0.821986 0.759791 907.0  
macro avg 0.751004 0.748569 0.761484 4026.0  
micro avg 0.781206 0.781206 0.781206 4026.0  
weighted avg 0.771790 0.769416 0.781206 4026.0  
The result of Model Number:Dataset Number:Featuregroup Number:Rescale of 68 : 0 : 9 :  
1

f1-score precision recall support  
AFIB 0.707026 0.708648 0.705488 875.0  
GSVT 0.709490 0.707490 0.711526 691.0  
SB 0.744599 0.738433 0.750879 1553.0  
SR 0.722261 0.733101 0.711768 907.0  
macro avg 0.720844 0.721918 0.719915 4026.0  
micro avg 0.725448 0.725448 0.725448 4026.0  
weighted avg 0.725375 0.725447 0.725448 4026.0  
The result of Model Number:Dataset Number:Featuregroup Number:Rescale of 68 : 0 :  
10 : 0

f1-score precision recall support  
AFIB 0.844298 0.870302 0.819972 204.0  
GSVT 0.865837 0.855238 0.876798 300.0  
SB 0.889355 0.884071 0.894733 892.0

SR 0.874364 0.878677 0.870128 681.0  
macro avg 0.868464 0.872072 0.865408 2077.0  
micro avg 0.876732 0.876732 0.876732 2077.0  
weighted avg 0.876618 0.876785 0.876732 2077.0  
The result of Model Number:Dataset Number:Featuregroup Number:Rescale of 68 : 0 :  
10 : 1

f1-score precision recall support  
AFIB 0.806042 0.813481 0.798782 875.0  
GSVT 0.824864 0.822637 0.827131 691.0  
SB 0.878491 0.870234 0.886916 1553.0  
SR 0.854219 0.862790 0.845833 907.0  
macro avg 0.840904 0.842285 0.839666 4026.0  
micro avg 0.848245 0.848245 0.848245 4026.0  
weighted avg 0.848073 0.848053 0.848245 4026.0

The result of Model Number:Dataset Number:Featuregroup Number:Rescale of 68 : 1 : 0 :  
0

f1-score precision recall support  
AFIB 0.683153 0.695707 0.671127 204.0  
GSVT 0.694628 0.690079 0.699256 300.0  
SB 0.706510 0.703060 0.709995 892.0  
SR 0.699207 0.702114 0.696334 681.0  
macro avg 0.695874 0.697740 0.694178 2077.0  
micro avg 0.700147 0.700147 0.700147 2077.0  
weighted avg 0.700105 0.700153 0.700147 2077.0

The result of Model Number:Dataset Number:Featuregroup Number:Rescale of 68 : 1 : 0 :  
1

f1-score precision recall support  
AFIB 0.906057 0.922708 0.890108 204.0  
GSVT 0.921276 0.915243 0.927414 300.0  
SB 0.937035 0.932460 0.941657 892.0  
SR 0.927350 0.931206 0.923540 681.0  
macro avg 0.922930 0.925404 0.920680 2077.0  
micro avg 0.928596 0.928596 0.928596 2077.0  
weighted avg 0.928541 0.928604 0.928596 2077.0

The result of Model Number:Dataset Number:Featuregroup Number:Rescale of 68 : 1 : 1 :  
0

f1-score precision recall support  
AFIB 0.667590 0.690937 0.646078 204.0  
GSVT 0.695784 0.691542 0.700172 300.0  
SB 0.710071 0.707154 0.713016 892.0  
SR 0.703507 0.702481 0.704540 681.0  
macro avg 0.694238 0.698029 0.690952 2077.0  
micro avg 0.701807 0.701807 0.701807 2077.0  
weighted avg 0.701683 0.701774 0.701807 2077.0

The result of Model Number:Dataset Number:Featuregroup Number:Rescale of 68 : 1 : 1 : 1

|              | f1-score | precision | recall   | support |
|--------------|----------|-----------|----------|---------|
| AFIB         | 0.692114 | 0.731487  | 0.657223 | 204.0   |
| GSVT         | 0.731409 | 0.723354  | 0.739681 | 300.0   |
| SB           | 0.742289 | 0.734903  | 0.749850 | 892.0   |
| SR           | 0.733665 | 0.736174  | 0.731290 | 681.0   |
| macro avg    | 0.724869 | 0.731479  | 0.719511 | 2077.0  |
| micro avg    | 0.733198 | 0.733198  | 0.733198 | 2077.0  |
| weighted avg | 0.732962 | 0.733316  | 0.733198 | 2077.0  |

The result of Model Number:Dataset Number:Featuregroup Number:Rescale of 68 : 1 : 2 : 0

|              | f1-score | precision | recall   | support |
|--------------|----------|-----------|----------|---------|
| AFIB         | 0.637104 | 0.710570  | 0.577491 | 204.0   |
| GSVT         | 0.751211 | 0.738136  | 0.764918 | 300.0   |
| SB           | 0.802062 | 0.798506  | 0.805657 | 892.0   |
| SR           | 0.783449 | 0.772736  | 0.794486 | 681.0   |
| macro avg    | 0.743456 | 0.754987  | 0.735638 | 2077.0  |
| micro avg    | 0.773700 | 0.773700  | 0.773700 | 2077.0  |
| weighted avg | 0.772412 | 0.772700  | 0.773700 | 2077.0  |

The result of Model Number:Dataset Number:Featuregroup Number:Rescale of 68 : 1 : 2 : 1

|              | f1-score | precision | recall   | support |
|--------------|----------|-----------|----------|---------|
| AFIB         | 0.903565 | 0.904988  | 0.902264 | 204.0   |
| GSVT         | 0.925418 | 0.923974  | 0.926944 | 300.0   |
| SB           | 0.944508 | 0.943356  | 0.945670 | 892.0   |
| SR           | 0.937894 | 0.939694  | 0.936105 | 681.0   |
| macro avg    | 0.927846 | 0.928003  | 0.927746 | 2077.0  |
| micro avg    | 0.935566 | 0.935566  | 0.935566 | 2077.0  |
| weighted avg | 0.935561 | 0.935587  | 0.935566 | 2077.0  |

The result of Model Number:Dataset Number:Featuregroup Number:Rescale of 68 : 1 : 3 : 0

|              | f1-score | precision | recall   | support |
|--------------|----------|-----------|----------|---------|
| AFIB         | 0.881985 | 0.873113  | 0.891063 | 875.0   |
| GSVT         | 0.889878 | 0.897801  | 0.882159 | 691.0   |
| SB           | 0.941451 | 0.938562  | 0.944360 | 1553.0  |
| SR           | 0.923220 | 0.931301  | 0.915281 | 907.0   |
| macro avg    | 0.909133 | 0.910194  | 0.908216 | 4026.0  |
| micro avg    | 0.915550 | 0.915550  | 0.915550 | 4026.0  |
| weighted avg | 0.915568 | 0.915706  | 0.915550 | 4026.0  |

The result of Model Number:Dataset Number:Featuregroup Number:Rescale of 68 : 1 : 3 : 1

|      | f1-score | precision | recall   | support |
|------|----------|-----------|----------|---------|
| AFIB | 0.711176 | 0.718757  | 0.703870 | 204.0   |

GSVT 0.724255 0.720282 0.728352 300.0  
SB 0.740973 0.739738 0.742217 892.0  
SR 0.734796 0.735993 0.733613 681.0  
macro avg 0.727800 0.728693 0.727013 2077.0  
micro avg 0.733627 0.733627 0.733627 2077.0  
weighted avg 0.733607 0.733639 0.733627 2077.0  
The result of Model Number:Dataset Number:Featuregroup Number:Rescale of 68 : 1 : 4 :  
0

f1-score precision recall support  
AFIB 0.893681 0.910267 0.877911 204.0  
GSVT 0.913332 0.908543 0.918191 300.0  
SB 0.927914 0.924615 0.931241 892.0  
SR 0.918360 0.920016 0.916751 681.0  
macro avg 0.913322 0.915860 0.911023 2077.0  
micro avg 0.919367 0.919367 0.919367 2077.0  
weighted avg 0.919313 0.919376 0.919367 2077.0  
The result of Model Number:Dataset Number:Featuregroup Number:Rescale of 68 : 1 : 4 :  
1

f1-score precision recall support  
AFIB 0.808590 0.798805 0.818654 875.0  
GSVT 0.819536 0.827938 0.811366 691.0  
SB 0.870430 0.867597 0.873288 1553.0  
SR 0.851391 0.860139 0.842849 907.0  
macro avg 0.837487 0.838620 0.836539 4026.0  
micro avg 0.843928 0.843928 0.843928 4026.0  
weighted avg 0.843966 0.844159 0.843928 4026.0  
The result of Model Number:Dataset Number:Featuregroup Number:Rescale of 68 : 1 : 5 :  
0

f1-score precision recall support  
AFIB 0.763563 0.752721 0.774807 875.0  
GSVT 0.791254 0.801348 0.781530 691.0  
SB 0.840885 0.839651 0.842130 1553.0  
SR 0.819936 0.826086 0.813879 907.0  
macro avg 0.803909 0.804952 0.803087 4026.0  
micro avg 0.810733 0.810733 0.810733 4026.0  
weighted avg 0.810842 0.811128 0.810733 4026.0  
The result of Model Number:Dataset Number:Featuregroup Number:Rescale of 68 : 1 : 5 :  
1

f1-score precision recall support  
AFIB 0.844611 0.865161 0.825222 204.0  
GSVT 0.855228 0.843455 0.867449 300.0  
SB 0.872497 0.863784 0.881394 892.0  
SR 0.857263 0.868513 0.846326 681.0  
macro avg 0.857400 0.860228 0.855098 2077.0



micro avg 0.862364 0.862364 0.862364 2077.0  
weighted avg 0.862269 0.862533 0.862364 2077.0  
The result of Model Number:Dataset Number:Featuregroup Number:Rescale of 68 : 1 : 6 :  
0

|              | f1-score | precision | recall   | support |
|--------------|----------|-----------|----------|---------|
| AFIB         | 0.810035 | 0.803839  | 0.816435 | 875.0   |
| GSVT         | 0.828673 | 0.833205  | 0.824240 | 691.0   |
| SB           | 0.877498 | 0.876884  | 0.878120 | 1553.0  |
| SR           | 0.854190 | 0.858334  | 0.850131 | 907.0   |
| macro avg    | 0.842599 | 0.843065  | 0.842231 | 4026.0  |
| micro avg    | 0.849160 | 0.849160  | 0.849160 | 4026.0  |
| weighted avg | 0.849205 | 0.849333  | 0.849160 | 4026.0  |

The result of Model Number:Dataset Number:Featuregroup Number:Rescale of 68 : 1 : 6 :  
1

|              | f1-score | precision | recall   | support |
|--------------|----------|-----------|----------|---------|
| AFIB         | 0.680793 | 0.683339  | 0.678555 | 875.0   |
| GSVT         | 0.696117 | 0.702833  | 0.689668 | 691.0   |
| SB           | 0.740190 | 0.732427  | 0.748177 | 1553.0  |
| SR           | 0.714558 | 0.720847  | 0.708624 | 907.0   |
| macro avg    | 0.707914 | 0.709861  | 0.706256 | 4026.0  |
| micro avg    | 0.714093 | 0.714093  | 0.714093 | 4026.0  |
| weighted avg | 0.713942 | 0.714070  | 0.714093 | 4026.0  |

The result of Model Number:Dataset Number:Featuregroup Number:Rescale of 68 : 1 : 7 :  
0

|              | f1-score | precision | recall   | support |
|--------------|----------|-----------|----------|---------|
| AFIB         | 0.700898 | 0.732548  | 0.672099 | 204.0   |
| GSVT         | 0.725276 | 0.717131  | 0.733741 | 300.0   |
| SB           | 0.697689 | 0.667271  | 0.746537 | 892.0   |
| SR           | 0.581271 | 0.586227  | 0.576496 | 681.0   |
| macro avg    | 0.676283 | 0.675794  | 0.682218 | 2077.0  |
| micro avg    | 0.681625 | 0.681625  | 0.681625 | 2077.0  |
| weighted avg | 0.663818 | 0.654312  | 0.681625 | 2077.0  |

The result of Model Number:Dataset Number:Featuregroup Number:Rescale of 68 : 1 : 7 :  
1

|              | f1-score | precision | recall   | support |
|--------------|----------|-----------|----------|---------|
| AFIB         | 0.720696 | 0.729953  | 0.711708 | 875.0   |
| GSVT         | 0.728669 | 0.722777  | 0.734776 | 691.0   |
| SB           | 0.779468 | 0.777124  | 0.781828 | 1553.0  |
| SR           | 0.760167 | 0.759847  | 0.760496 | 907.0   |
| macro avg    | 0.747250 | 0.747425  | 0.747202 | 4026.0  |
| micro avg    | 0.753707 | 0.753707  | 0.753707 | 4026.0  |
| weighted avg | 0.753628 | 0.753652  | 0.753707 | 4026.0  |

The result of Model Number:Dataset Number:Featuregroup Number:Rescale of 68 : 1 : 8 :  
0

f1-score precision recall support  
AFIB 0.866716 0.916021 0.823023 204.0  
GSVT 0.915924 0.905837 0.926283 300.0  
SB 0.929548 0.920299 0.939017 892.0  
SR 0.918750 0.921891 0.915775 681.0  
macro avg 0.907735 0.916012 0.901025 2077.0  
micro avg 0.918165 0.918165 0.918165 2077.0  
weighted avg 0.917869 0.918312 0.918165 2077.0  
The result of Model Number:Dataset Number:Featuregroup Number:Rescale of 68 : 1 : 8 :  
1

f1-score precision recall support  
AFIB 0.661291 0.660009 0.662664 875.0  
GSVT 0.673708 0.661921 0.685988 691.0  
SB 0.721732 0.711492 0.732279 1553.0  
SR 0.683671 0.714148 0.655718 907.0  
macro avg 0.685101 0.686893 0.684162 4026.0  
micro avg 0.691956 0.691956 0.691956 4026.0  
weighted avg 0.691779 0.692393 0.691956 4026.0  
The result of Model Number:Dataset Number:Featuregroup Number:Rescale of 68 : 1 : 9 :  
0

f1-score precision recall support  
AFIB 0.829320 0.869136 0.793158 204.0  
GSVT 0.865393 0.858044 0.872892 300.0  
SB 0.878992 0.872591 0.885494 892.0  
SR 0.869746 0.870149 0.869369 681.0  
macro avg 0.860863 0.867480 0.855228 2077.0  
micro avg 0.869318 0.869318 0.869318 2077.0  
weighted avg 0.869118 0.869350 0.869318 2077.0  
The result of Model Number:Dataset Number:Featuregroup Number:Rescale of 68 : 1 : 9 :  
1

f1-score precision recall support  
AFIB 0.629175 0.686158 0.581980 204.0  
GSVT 0.730273 0.721928 0.739038 300.0  
SB 0.774411 0.772429 0.776408 892.0  
SR 0.755451 0.745221 0.765987 681.0  
macro avg 0.722328 0.731434 0.715853 2077.0  
micro avg 0.748497 0.748497 0.748497 2077.0  
weighted avg 0.747554 0.747740 0.748497 2077.0  
The result of Model Number:Dataset Number:Featuregroup Number:Rescale of 68 : 1 :  
10 : 0

f1-score precision recall support  
AFIB 0.628021 0.624067 0.707423 204.0  
GSVT 0.765569 0.761631 0.769676 300.0  
SB 0.787366 0.783620 0.791158 892.0

SR 0.617600 0.619635 0.615951 681.0  
macro avg 0.699639 0.697238 0.721052 2077.0  
micro avg 0.722384 0.722384 0.722384 2077.0  
weighted avg 0.712905 0.711006 0.722384 2077.0  
The result of Model Number:Dataset Number:Featuregroup Number:Rescale of 68 : 1 :  
10 : 1

f1-score precision recall support  
AFIB 0.898648 0.918480 0.879721 204.0  
GSVT 0.918288 0.903060 0.934148 300.0  
SB 0.935933 0.928612 0.943380 892.0  
SR 0.913219 0.924211 0.902488 681.0  
macro avg 0.916522 0.918591 0.914934 2077.0  
micro avg 0.922387 0.922387 0.922387 2077.0  
weighted avg 0.922275 0.922483 0.922387 2077.0

The result of Model Number:Dataset Number:Featuregroup Number:Rescale of 69 : 0 : 0 :  
0

f1-score precision recall support  
AFIB 0.685397 0.699206 0.672563 204.0  
GSVT 0.707390 0.701708 0.713300 300.0  
SB 0.722704 0.721976 0.723433 892.0  
SR 0.716116 0.715705 0.716536 681.0  
macro avg 0.707902 0.709649 0.706458 2077.0  
micro avg 0.714712 0.714712 0.714712 2077.0  
weighted avg 0.714668 0.714756 0.714712 2077.0

The result of Model Number:Dataset Number:Featuregroup Number:Rescale of 69 : 0 : 0 :  
1

f1-score precision recall support  
AFIB 0.662609 0.663201 0.662088 875.0  
GSVT 0.674747 0.676517 0.673099 691.0  
SB 0.716253 0.711484 0.721093 1553.0  
SR 0.702297 0.708709 0.696026 907.0  
macro avg 0.688977 0.689978 0.688076 4026.0  
micro avg 0.694384 0.694384 0.694384 4026.0  
weighted avg 0.694326 0.694363 0.694384 4026.0

The result of Model Number:Dataset Number:Featuregroup Number:Rescale of 69 : 0 : 1 :  
0

f1-score precision recall support  
AFIB 0.687453 0.693638 0.681592 875.0  
GSVT 0.701456 0.687233 0.716446 691.0  
SB 0.743899 0.735623 0.752453 1553.0  
SR 0.714380 0.735616 0.694505 907.0  
macro avg 0.711797 0.713028 0.711249 4026.0  
micro avg 0.717817 0.717817 0.717817 4026.0  
weighted avg 0.717696 0.718191 0.717817 4026.0

The result of Model Number:Dataset Number:Featuregroup Number:Rescale of 69 : 0 : 1 : 1

|              | f1-score | precision | recall   | support |
|--------------|----------|-----------|----------|---------|
| AFIB         | 0.721085 | 0.670555  | 0.846778 | 875.0   |
| GSVT         | 0.618424 | 0.577385  | 0.699499 | 691.0   |
| SB           | 0.738976 | 0.732742  | 0.745335 | 1553.0  |
| SR           | 0.712266 | 0.729531  | 0.696048 | 907.0   |
| macro avg    | 0.697688 | 0.677553  | 0.746915 | 4026.0  |
| micro avg    | 0.748412 | 0.748412  | 0.748412 | 4026.0  |
| weighted avg | 0.708380 | 0.691838  | 0.748412 | 4026.0  |

The result of Model Number:Dataset Number:Featuregroup Number:Rescale of 69 : 0 : 2 : 0

|              | f1-score | precision | recall   | support |
|--------------|----------|-----------|----------|---------|
| AFIB         | 0.826963 | 0.829808  | 0.824242 | 875.0   |
| GSVT         | 0.842663 | 0.825851  | 0.860326 | 691.0   |
| SB           | 0.892026 | 0.887202  | 0.896908 | 1553.0  |
| SR           | 0.857524 | 0.877462  | 0.838523 | 907.0   |
| macro avg    | 0.854794 | 0.855081  | 0.854999 | 4026.0  |
| micro avg    | 0.861683 | 0.861683  | 0.861683 | 4026.0  |
| weighted avg | 0.861640 | 0.862004  | 0.861683 | 4026.0  |

The result of Model Number:Dataset Number:Featuregroup Number:Rescale of 69 : 0 : 2 : 1

|              | f1-score | precision | recall   | support |
|--------------|----------|-----------|----------|---------|
| AFIB         | 0.707414 | 0.729281  | 0.687437 | 204.0   |
| GSVT         | 0.660362 | 0.674718  | 0.647091 | 300.0   |
| SB           | 0.696515 | 0.665602  | 0.730473 | 892.0   |
| SR           | 0.627135 | 0.659361  | 0.598001 | 681.0   |
| macro avg    | 0.672857 | 0.682241  | 0.665751 | 2077.0  |
| micro avg    | 0.670768 | 0.670768  | 0.670768 | 2077.0  |
| weighted avg | 0.669615 | 0.671127  | 0.670768 | 2077.0  |

The result of Model Number:Dataset Number:Featuregroup Number:Rescale of 69 : 0 : 3 : 0

|              | f1-score | precision | recall   | support |
|--------------|----------|-----------|----------|---------|
| AFIB         | 0.761500 | 0.772279  | 0.751641 | 204.0   |
| GSVT         | 0.777309 | 0.762998  | 0.792311 | 300.0   |
| SB           | 0.793877 | 0.785099  | 0.802866 | 892.0   |
| SR           | 0.777193 | 0.793022  | 0.762030 | 681.0   |
| macro avg    | 0.777470 | 0.778350  | 0.777212 | 2077.0  |
| micro avg    | 0.782921 | 0.782921  | 0.782921 | 2077.0  |
| weighted avg | 0.782834 | 0.783246  | 0.782921 | 2077.0  |

The result of Model Number:Dataset Number:Featuregroup Number:Rescale of 69 : 0 : 3 : 1

|      | f1-score | precision | recall   | support |
|------|----------|-----------|----------|---------|
| AFIB | 0.834332 | 0.844684  | 0.824510 | 204.0   |

GSVT 0.849292 0.843489 0.855264 300.0  
SB 0.869404 0.868046 0.870767 892.0  
SR 0.863159 0.864559 0.861771 681.0  
macro avg 0.854047 0.855195 0.853078 2077.0  
micro avg 0.861035 0.861035 0.861035 2077.0  
weighted avg 0.861007 0.861061 0.861035 2077.0  
The result of Model Number:Dataset Number:Featuregroup Number:Rescale of 69 : 0 : 4 :  
0

f1-score precision recall support

AFIB 0.845848 0.846992 0.844869 875.0  
GSVT 0.859022 0.858581 0.859497 691.0  
SB 0.897160 0.893950 0.900396 1553.0  
SR 0.875676 0.880584 0.870878 907.0  
macro avg 0.869427 0.870027 0.868910 4026.0  
micro avg 0.874658 0.874658 0.874658 4026.0  
weighted avg 0.874622 0.874663 0.874658 4026.0

The result of Model Number:Dataset Number:Featuregroup Number:Rescale of 69 : 0 : 4 :  
1

f1-score precision recall support

AFIB 0.681408 0.696936 0.666665 875.0  
GSVT 0.725105 0.726538 0.723920 691.0  
SB 0.793313 0.788971 0.797706 1553.0  
SR 0.749800 0.740705 0.759226 907.0  
macro avg 0.737406 0.738288 0.736879 4026.0  
micro avg 0.747893 0.747893 0.747893 4026.0  
weighted avg 0.747482 0.747379 0.747893 4026.0

The result of Model Number:Dataset Number:Featuregroup Number:Rescale of 69 : 0 : 5 :  
0

f1-score precision recall support

AFIB 0.752451 0.839217 0.682045 204.0  
GSVT 0.887217 0.871774 0.903405 300.0  
SB 0.947273 0.943075 0.951520 892.0  
SR 0.925291 0.912639 0.938326 681.0  
macro avg 0.878058 0.891676 0.868824 2077.0  
micro avg 0.913777 0.913777 0.913777 2077.0  
weighted avg 0.912256 0.912596 0.913777 2077.0

The result of Model Number:Dataset Number:Featuregroup Number:Rescale of 69 : 0 : 5 :  
1

f1-score precision recall support

AFIB 0.804091 0.801618 0.806630 875.0  
GSVT 0.783593 0.787436 0.779913 691.0  
SB 0.823776 0.789591 0.861064 1553.0  
SR 0.708928 0.773480 0.654376 907.0  
macro avg 0.780097 0.788031 0.775496 4026.0

micro avg 0.788741 0.788741 0.788741 4026.0  
weighted avg 0.786728 0.788206 0.788741 4026.0  
The result of Model Number:Dataset Number:Featuregroup Number:Rescale of 69 : 0 : 6 :  
0

|              | f1-score | precision | recall   | support |
|--------------|----------|-----------|----------|---------|
| AFIB         | 0.808591 | 0.810705  | 0.806645 | 204.0   |
| GSVT         | 0.826834 | 0.823633  | 0.830129 | 300.0   |
| SB           | 0.845378 | 0.844250  | 0.846513 | 892.0   |
| SR           | 0.838607 | 0.840963  | 0.836267 | 681.0   |
| macro avg    | 0.829852 | 0.829888  | 0.829889 | 2077.0  |
| micro avg    | 0.836872 | 0.836872  | 0.836872 | 2077.0  |
| weighted avg | 0.836866 | 0.836900  | 0.836872 | 2077.0  |

The result of Model Number:Dataset Number:Featuregroup Number:Rescale of 69 : 0 : 6 :  
1

|              | f1-score | precision | recall   | support |
|--------------|----------|-----------|----------|---------|
| AFIB         | 0.907540 | 0.942099  | 0.875625 | 204.0   |
| GSVT         | 0.936454 | 0.927016  | 0.946128 | 300.0   |
| SB           | 0.955198 | 0.950443  | 0.960014 | 892.0   |
| SR           | 0.943660 | 0.944254  | 0.943098 | 681.0   |
| macro avg    | 0.935713 | 0.940953  | 0.931216 | 2077.0  |
| micro avg    | 0.944173 | 0.944173  | 0.944173 | 2077.0  |
| weighted avg | 0.944027 | 0.944210  | 0.944173 | 2077.0  |

The result of Model Number:Dataset Number:Featuregroup Number:Rescale of 69 : 0 : 7 :  
0

|              | f1-score | precision | recall   | support |
|--------------|----------|-----------|----------|---------|
| AFIB         | 0.878476 | 0.883734  | 0.873325 | 204.0   |
| GSVT         | 0.901877 | 0.899197  | 0.904581 | 300.0   |
| SB           | 0.915688 | 0.914566  | 0.916816 | 892.0   |
| SR           | 0.909013 | 0.910085  | 0.907950 | 681.0   |
| macro avg    | 0.901263 | 0.901895  | 0.900668 | 2077.0  |
| micro avg    | 0.907870 | 0.907870  | 0.907870 | 2077.0  |
| weighted avg | 0.907850 | 0.907849  | 0.907870 | 2077.0  |

The result of Model Number:Dataset Number:Featuregroup Number:Rescale of 69 : 0 : 7 :  
1

|              | f1-score | precision | recall   | support |
|--------------|----------|-----------|----------|---------|
| AFIB         | 0.696724 | 0.687074  | 0.706678 | 875.0   |
| GSVT         | 0.712177 | 0.717941  | 0.706509 | 691.0   |
| SB           | 0.755968 | 0.753795  | 0.758157 | 1553.0  |
| SR           | 0.737577 | 0.747177  | 0.728228 | 907.0   |
| macro avg    | 0.725612 | 0.726497  | 0.724893 | 4026.0  |
| micro avg    | 0.731362 | 0.731362  | 0.731362 | 4026.0  |
| weighted avg | 0.731433 | 0.731650  | 0.731362 | 4026.0  |

The result of Model Number:Dataset Number:Featuregroup Number:Rescale of 69 : 0 : 8 :  
0

f1-score precision recall support  
AFIB 0.686094 0.716204 0.658586 204.0  
GSVT 0.638709 0.643307 0.634438 300.0  
SB 0.662391 0.629128 0.699371 892.0  
SR 0.587645 0.626444 0.553496 681.0  
macro avg 0.643710 0.653771 0.636473 2077.0  
micro avg 0.638157 0.638157 0.638157 2077.0  
weighted avg 0.636791 0.638849 0.638157 2077.0  
The result of Model Number:Dataset Number:Featuregroup Number:Rescale of 69 : 0 : 8 :  
1

f1-score precision recall support  
AFIB 0.876703 0.869953 0.883626 875.0  
GSVT 0.888085 0.892209 0.884194 691.0  
SB 0.951707 0.946644 0.956845 1553.0  
SR 0.923667 0.936653 0.911138 907.0  
macro avg 0.910041 0.911365 0.908951 4026.0  
micro avg 0.918165 0.918165 0.918165 4026.0  
weighted avg 0.918169 0.918383 0.918165 4026.0  
The result of Model Number:Dataset Number:Featuregroup Number:Rescale of 69 : 0 : 9 :  
0

f1-score precision recall support  
AFIB 0.812931 0.814387 0.811506 875.0  
GSVT 0.778436 0.782525 0.774411 691.0  
SB 0.823397 0.778102 0.874298 1553.0  
SR 0.683835 0.769706 0.615261 907.0  
macro avg 0.774650 0.786180 0.768869 4026.0  
micro avg 0.785150 0.785150 0.785150 4026.0  
weighted avg 0.781964 0.784856 0.785150 4026.0  
The result of Model Number:Dataset Number:Featuregroup Number:Rescale of 69 : 0 : 9 :  
1

f1-score precision recall support  
AFIB 0.577604 0.639995 0.526403 204.0  
GSVT 0.669567 0.658677 0.680928 300.0  
SB 0.714052 0.710801 0.717333 892.0  
SR 0.696798 0.687931 0.705907 681.0  
macro avg 0.664505 0.674351 0.657643 2077.0  
micro avg 0.689576 0.689576 0.689576 2077.0  
weighted avg 0.688568 0.688819 0.689576 2077.0  
The result of Model Number:Dataset Number:Featuregroup Number:Rescale of 69 : 0 :  
10 : 0

f1-score precision recall support  
AFIB 0.783772 0.797874 0.770391 204.0  
GSVT 0.801454 0.790185 0.813182 300.0  
SB 0.813786 0.804171 0.823637 892.0

SR 0.797419 0.811616 0.783719 681.0  
macro avg 0.799108 0.800961 0.797732 2077.0  
micro avg 0.803809 0.803809 0.803809 2077.0  
weighted avg 0.803690 0.803973 0.803809 2077.0  
The result of Model Number:Dataset Number:Featuregroup Number:Rescale of 69 : 0 :  
10 : 1

f1-score precision recall support  
AFIB 0.778079 0.793069 0.764013 204.0  
GSVT 0.792690 0.779810 0.806146 300.0  
SB 0.805924 0.796312 0.815772 892.0  
SR 0.790931 0.805760 0.776652 681.0  
macro avg 0.791906 0.793738 0.790646 2077.0  
micro avg 0.796472 0.796472 0.796472 2077.0  
weighted avg 0.796362 0.796708 0.796472 2077.0  
The result of Model Number:Dataset Number:Featuregroup Number:Rescale of 69 : 1 : 0 :  
0

f1-score precision recall support  
AFIB 0.837601 0.815597 0.890037 875.0  
GSVT 0.805764 0.762666 0.918554 691.0  
SB 0.763503 0.758678 0.768413 1553.0  
SR 0.741623 0.754400 0.729477 907.0  
macro avg 0.787123 0.772835 0.826620 4026.0  
micro avg 0.811844 0.811844 0.811844 4026.0  
weighted avg 0.781931 0.770769 0.811844 4026.0  
The result of Model Number:Dataset Number:Featuregroup Number:Rescale of 69 : 1 : 0 :  
1

f1-score precision recall support  
AFIB 0.671323 0.664855 0.678021 875.0  
GSVT 0.688911 0.690882 0.687024 691.0  
SB 0.732431 0.730747 0.734129 1553.0  
SR 0.711828 0.720203 0.703660 907.0  
macro avg 0.701123 0.701672 0.700708 4026.0  
micro avg 0.706985 0.706985 0.706985 4026.0  
weighted avg 0.707039 0.707209 0.706985 4026.0  
The result of Model Number:Dataset Number:Featuregroup Number:Rescale of 69 : 1 : 1 :  
0

f1-score precision recall support  
AFIB 0.780988 0.777077 0.785196 875.0  
GSVT 0.798634 0.799714 0.797717 691.0  
SB 0.850436 0.847635 0.853278 1553.0  
SR 0.825460 0.834028 0.817165 907.0  
macro avg 0.813880 0.814614 0.813339 4026.0  
micro avg 0.820809 0.820809 0.820809 4026.0  
weighted avg 0.820825 0.821010 0.820809 4026.0



The result of Model Number:Dataset Number:Featuregroup Number:Rescale of 69 : 1 : 1 :  
1

|              | f1-score | precision | recall   | support |
|--------------|----------|-----------|----------|---------|
| AFIB         | 0.839920 | 0.847545  | 0.832861 | 204.0   |
| GSVT         | 0.867679 | 0.862436  | 0.873215 | 300.0   |
| SB           | 0.885832 | 0.884645  | 0.887024 | 892.0   |
| SR           | 0.877636 | 0.879456  | 0.875830 | 681.0   |
| macro avg    | 0.867767 | 0.868520  | 0.867232 | 2077.0  |
| micro avg    | 0.876039 | 0.876039  | 0.876039 | 2077.0  |
| weighted avg | 0.876013 | 0.876092  | 0.876039 | 2077.0  |

The result of Model Number:Dataset Number:Featuregroup Number:Rescale of 69 : 1 : 2 :  
0

|              | f1-score | precision | recall   | support |
|--------------|----------|-----------|----------|---------|
| AFIB         | 0.832999 | 0.823281  | 0.845122 | 875.0   |
| GSVT         | 0.857106 | 0.846717  | 0.868444 | 691.0   |
| SB           | 0.870025 | 0.836442  | 0.919285 | 1553.0  |
| SR           | 0.690845 | 0.727286  | 0.657923 | 907.0   |
| macro avg    | 0.812744 | 0.808431  | 0.822693 | 4026.0  |
| micro avg    | 0.835559 | 0.835559  | 0.835559 | 4026.0  |
| weighted avg | 0.819394 | 0.810754  | 0.835559 | 4026.0  |

The result of Model Number:Dataset Number:Featuregroup Number:Rescale of 69 : 1 : 2 :  
1

|              | f1-score | precision | recall   | support |
|--------------|----------|-----------|----------|---------|
| AFIB         | 0.687096 | 0.685638  | 0.688592 | 875.0   |
| GSVT         | 0.697830 | 0.694485  | 0.701266 | 691.0   |
| SB           | 0.734464 | 0.725696  | 0.743448 | 1553.0  |
| SR           | 0.700332 | 0.720173  | 0.681569 | 907.0   |
| macro avg    | 0.704930 | 0.706498  | 0.703719 | 4026.0  |
| micro avg    | 0.710346 | 0.710346  | 0.710346 | 4026.0  |
| weighted avg | 0.710192 | 0.710389  | 0.710346 | 4026.0  |

The result of Model Number:Dataset Number:Featuregroup Number:Rescale of 69 : 1 : 3 :  
0

|              | f1-score | precision | recall   | support |
|--------------|----------|-----------|----------|---------|
| AFIB         | 0.663998 | 0.648909  | 0.679852 | 875.0   |
| GSVT         | 0.686754 | 0.697891  | 0.676023 | 691.0   |
| SB           | 0.732691 | 0.732696  | 0.732692 | 1553.0  |
| SR           | 0.713939 | 0.722072  | 0.705988 | 907.0   |
| macro avg    | 0.699345 | 0.700392  | 0.698639 | 4026.0  |
| micro avg    | 0.705465 | 0.705465  | 0.705465 | 4026.0  |
| weighted avg | 0.705653 | 0.706119  | 0.705465 | 4026.0  |

The result of Model Number:Dataset Number:Featuregroup Number:Rescale of 69 : 1 : 3 :  
1

|      | f1-score | precision | recall   | support |
|------|----------|-----------|----------|---------|
| AFIB | 0.737269 | 0.730749  | 0.743938 | 875.0   |

GSVT 0.670306 0.649140 0.745729 691.0  
SB 0.604317 0.580228 0.641988 1553.0  
SR 0.622836 0.629281 0.616563 907.0  
macro avg 0.658682 0.647350 0.687054 4026.0  
micro avg 0.676223 0.676223 0.676223 4026.0  
weighted avg 0.648711 0.635820 0.676223 4026.0  
The result of Model Number:Dataset Number:Featuregroup Number:Rescale of 69 : 1 : 4 :  
0

f1-score precision recall support  
AFIB 0.888564 0.877812 0.899624 875.0  
GSVT 0.900592 0.909826 0.891614 691.0  
SB 0.956520 0.953408 0.959661 1553.0  
SR 0.935599 0.945212 0.926211 907.0  
macro avg 0.920319 0.921564 0.919277 4026.0  
micro avg 0.927398 0.927398 0.927398 4026.0  
weighted avg 0.927438 0.927651 0.927398 4026.0  
The result of Model Number:Dataset Number:Featuregroup Number:Rescale of 69 : 1 : 4 :  
1

f1-score precision recall support  
AFIB 0.766000 0.854329 0.694326 204.0  
GSVT 0.903193 0.887472 0.919672 300.0  
SB 0.964331 0.960056 0.968653 892.0  
SR 0.941952 0.929073 0.955222 681.0  
macro avg 0.893869 0.907732 0.884468 2077.0  
micro avg 0.930231 0.930231 0.930231 2077.0  
weighted avg 0.928683 0.929029 0.930231 2077.0  
The result of Model Number:Dataset Number:Featuregroup Number:Rescale of 69 : 1 : 5 :  
0

f1-score precision recall support  
AFIB 0.677481 0.672299 0.682833 875.0  
GSVT 0.693069 0.696859 0.689361 691.0  
SB 0.733904 0.733390 0.734424 1553.0  
SR 0.714410 0.717875 0.711015 907.0  
macro avg 0.704716 0.705106 0.704408 4026.0  
micro avg 0.710203 0.710203 0.710203 4026.0  
weighted avg 0.710241 0.710347 0.710203 4026.0  
The result of Model Number:Dataset Number:Featuregroup Number:Rescale of 69 : 1 : 5 :  
1

f1-score precision recall support  
AFIB 0.877191 0.899403 0.856131 204.0  
GSVT 0.896242 0.886495 0.906353 300.0  
SB 0.921485 0.916886 0.926133 892.0  
SR 0.907202 0.911273 0.903205 681.0  
macro avg 0.900530 0.903514 0.897955 2077.0

micro avg 0.908883 0.908883 0.908883 2077.0  
weighted avg 0.908805 0.908939 0.908883 2077.0  
The result of Model Number:Dataset Number:Featuregroup Number:Rescale of 69 : 1 : 6 :  
0

|              | f1-score | precision | recall   | support |
|--------------|----------|-----------|----------|---------|
| AFIB         | 0.709597 | 0.726308  | 0.693698 | 875.0   |
| GSVT         | 0.748020 | 0.749909  | 0.746190 | 691.0   |
| SB           | 0.813485 | 0.810113  | 0.816889 | 1553.0  |
| SR           | 0.774036 | 0.761846  | 0.786660 | 907.0   |
| macro avg    | 0.761285 | 0.762044  | 0.760859 | 4026.0  |
| micro avg    | 0.771170 | 0.771170  | 0.771170 | 4026.0  |
| weighted avg | 0.770783 | 0.770692  | 0.771170 | 4026.0  |

The result of Model Number:Dataset Number:Featuregroup Number:Rescale of 69 : 1 : 6 :  
1

|              | f1-score | precision | recall   | support |
|--------------|----------|-----------|----------|---------|
| AFIB         | 0.884673 | 0.873967  | 0.895684 | 875.0   |
| GSVT         | 0.896648 | 0.905841  | 0.887709 | 691.0   |
| SB           | 0.952331 | 0.949232  | 0.955458 | 1553.0  |
| SR           | 0.931501 | 0.941073  | 0.922155 | 907.0   |
| macro avg    | 0.916288 | 0.917528  | 0.915251 | 4026.0  |
| micro avg    | 0.923336 | 0.923336  | 0.923336 | 4026.0  |
| weighted avg | 0.923377 | 0.923589  | 0.923336 | 4026.0  |

The result of Model Number:Dataset Number:Featuregroup Number:Rescale of 69 : 1 : 7 :  
0

|              | f1-score | precision | recall   | support |
|--------------|----------|-----------|----------|---------|
| AFIB         | 0.651543 | 0.643362  | 0.660123 | 875.0   |
| GSVT         | 0.604502 | 0.622805  | 0.589266 | 691.0   |
| SB           | 0.650843 | 0.602824  | 0.708895 | 1553.0  |
| SR           | 0.506051 | 0.619368  | 0.431520 | 907.0   |
| macro avg    | 0.603235 | 0.622090  | 0.597451 | 4026.0  |
| micro avg    | 0.615274 | 0.615274  | 0.615274 | 4026.0  |
| weighted avg | 0.610422 | 0.618791  | 0.615274 | 4026.0  |

The result of Model Number:Dataset Number:Featuregroup Number:Rescale of 69 : 1 : 7 :  
1

|              | f1-score | precision | recall   | support |
|--------------|----------|-----------|----------|---------|
| AFIB         | 0.723160 | 0.728221  | 0.718194 | 204.0   |
| GSVT         | 0.739985 | 0.736337  | 0.743681 | 300.0   |
| SB           | 0.754692 | 0.753436  | 0.755961 | 892.0   |
| SR           | 0.747181 | 0.748955  | 0.745424 | 681.0   |
| macro avg    | 0.741254 | 0.741737  | 0.740815 | 2077.0  |
| micro avg    | 0.747023 | 0.747023  | 0.747023 | 2077.0  |
| weighted avg | 0.747008 | 0.747020  | 0.747023 | 2077.0  |

The result of Model Number:Dataset Number:Featuregroup Number:Rescale of 69 : 1 : 8 :  
0

f1-score precision recall support  
AFIB 0.845555 0.856515 0.835095 204.0  
GSVT 0.878272 0.877704 0.878867 300.0  
SB 0.896778 0.894885 0.898686 892.0  
SR 0.887759 0.887254 0.888283 681.0  
macro avg 0.877091 0.879090 0.875233 2077.0  
micro avg 0.886167 0.886167 0.886167 2077.0  
weighted avg 0.886117 0.886133 0.886167 2077.0  
The result of Model Number:Dataset Number:Featuregroup Number:Rescale of 69 : 1 : 8 :  
1

f1-score precision recall support  
AFIB 0.738520 0.813030 0.676952 204.0  
GSVT 0.870930 0.858909 0.883432 300.0  
SB 0.924759 0.921674 0.927869 892.0  
SR 0.901077 0.888611 0.913910 681.0  
macro avg 0.858822 0.870556 0.850541 2077.0  
micro avg 0.892229 0.892229 0.892229 2077.0  
weighted avg 0.890927 0.891097 0.892229 2077.0  
The result of Model Number:Dataset Number:Featuregroup Number:Rescale of 69 : 1 : 9 :  
0

f1-score precision recall support  
AFIB 0.764270 0.752035 0.859959 204.0  
GSVT 0.894759 0.884376 0.905714 300.0  
SB 0.924719 0.921227 0.928243 892.0  
SR 0.725551 0.729302 0.721961 681.0  
macro avg 0.827325 0.821735 0.853969 2077.0  
micro avg 0.850647 0.850647 0.850647 2077.0  
weighted avg 0.839330 0.836359 0.850647 2077.0  
The result of Model Number:Dataset Number:Featuregroup Number:Rescale of 69 : 1 : 9 :  
1

f1-score precision recall support  
AFIB 0.872782 0.879681 0.866018 875.0  
GSVT 0.894743 0.892852 0.896676 691.0  
SB 0.953823 0.945392 0.962417 1553.0  
SR 0.928431 0.937537 0.919523 907.0  
macro avg 0.912445 0.913865 0.911159 4026.0  
micro avg 0.920519 0.920519 0.920519 4026.0  
weighted avg 0.920349 0.920323 0.920519 4026.0  
The result of Model Number:Dataset Number:Featuregroup Number:Rescale of 69 : 1 :  
10 : 0

f1-score precision recall support  
AFIB 0.731072 0.769564 0.696442 204.0  
GSVT 0.767782 0.761058 0.774662 300.0  
SB 0.787705 0.782842 0.792643 892.0

SR 0.776958 0.775382 0.778559 681.0  
macro avg 0.765879 0.772212 0.760576 2077.0  
micro avg 0.775979 0.775979 0.775979 2077.0  
weighted avg 0.775741 0.775946 0.775979 2077.0  
The result of Model Number:Dataset Number:Featuregroup Number:Rescale of 69 : 1 :  
10 : 1

f1-score precision recall support  
AFIB 0.800653 0.852821 0.754855 204.0  
GSVT 0.835728 0.815186 0.857446 300.0  
SB 0.860238 0.849188 0.871610 892.0  
SR 0.837894 0.847899 0.828178 681.0  
macro avg 0.833628 0.841273 0.828022 2077.0  
micro avg 0.843856 0.843856 0.843856 2077.0  
weighted avg 0.843520 0.844211 0.843856 2077.0

The result of Model Number:Dataset Number:Featuregroup Number:Rescale of 70 : 0 : 0 :  
0

f1-score precision recall support  
AFIB 0.758929 0.765758 0.752459 875.0  
GSVT 0.774389 0.758687 0.790937 691.0  
SB 0.821244 0.812108 0.830687 1553.0  
SR 0.788656 0.812099 0.766714 907.0  
macro avg 0.785804 0.787163 0.785199 4026.0  
micro avg 0.792450 0.792450 0.792450 4026.0  
weighted avg 0.792317 0.792863 0.792450 4026.0

The result of Model Number:Dataset Number:Featuregroup Number:Rescale of 70 : 0 : 0 :  
1

f1-score precision recall support  
AFIB 0.751721 0.774688 0.730162 875.0  
GSVT 0.797738 0.795036 0.800528 691.0  
SB 0.871724 0.868222 0.875258 1553.0  
SR 0.825620 0.811299 0.840536 907.0  
macro avg 0.811701 0.812311 0.811621 4026.0  
micro avg 0.823075 0.823075 0.823075 4026.0  
weighted avg 0.822558 0.822508 0.823075 4026.0

The result of Model Number:Dataset Number:Featuregroup Number:Rescale of 70 : 0 : 1 :  
0

f1-score precision recall support  
AFIB 0.798281 0.812971 0.784519 204.0  
GSVT 0.827733 0.820801 0.834927 300.0  
SB 0.843276 0.841863 0.844694 892.0  
SR 0.835830 0.836573 0.835094 681.0  
macro avg 0.826280 0.828052 0.824808 2077.0  
micro avg 0.834225 0.834225 0.834225 2077.0  
weighted avg 0.834170 0.834248 0.834225 2077.0

The result of Model Number:Dataset Number:Featuregroup Number:Rescale of 70 : 0 : 1 : 1

|              | f1-score | precision | recall   | support |
|--------------|----------|-----------|----------|---------|
| AFIB         | 0.875414 | 0.892895  | 0.858737 | 204.0   |
| GSVT         | 0.885245 | 0.874184  | 0.896723 | 300.0   |
| SB           | 0.902146 | 0.893520  | 0.910941 | 892.0   |
| SR           | 0.885763 | 0.897382  | 0.874464 | 681.0   |
| macro avg    | 0.887142 | 0.889495  | 0.885216 | 2077.0  |
| micro avg    | 0.891800 | 0.891800  | 0.891800 | 2077.0  |
| weighted avg | 0.891707 | 0.891932  | 0.891800 | 2077.0  |

The result of Model Number:Dataset Number:Featuregroup Number:Rescale of 70 : 0 : 2 : 0

|              | f1-score | precision | recall   | support |
|--------------|----------|-----------|----------|---------|
| AFIB         | 0.621063 | 0.636551  | 0.606356 | 875.0   |
| GSVT         | 0.660702 | 0.663235  | 0.658219 | 691.0   |
| SB           | 0.715485 | 0.712021  | 0.718985 | 1553.0  |
| SR           | 0.677961 | 0.666661  | 0.689695 | 907.0   |
| macro avg    | 0.668803 | 0.669617  | 0.668314 | 4026.0  |
| micro avg    | 0.677478 | 0.677478  | 0.677478 | 4026.0  |
| weighted avg | 0.677107 | 0.677026  | 0.677478 | 4026.0  |

The result of Model Number:Dataset Number:Featuregroup Number:Rescale of 70 : 0 : 2 : 1

|              | f1-score | precision | recall   | support |
|--------------|----------|-----------|----------|---------|
| AFIB         | 0.654270 | 0.653002  | 0.655628 | 875.0   |
| GSVT         | 0.666556 | 0.654894  | 0.678705 | 691.0   |
| SB           | 0.714070 | 0.703938  | 0.724505 | 1553.0  |
| SR           | 0.676413 | 0.706566  | 0.648756 | 907.0   |
| macro avg    | 0.677827 | 0.679600  | 0.676899 | 4026.0  |
| micro avg    | 0.684610 | 0.684610  | 0.684610 | 4026.0  |
| weighted avg | 0.684435 | 0.685042  | 0.684610 | 4026.0  |

The result of Model Number:Dataset Number:Featuregroup Number:Rescale of 70 : 0 : 3 : 0

|              | f1-score | precision | recall   | support |
|--------------|----------|-----------|----------|---------|
| AFIB         | 0.666139 | 0.672133  | 0.660460 | 875.0   |
| GSVT         | 0.679708 | 0.665926  | 0.694233 | 691.0   |
| SB           | 0.720835 | 0.712816  | 0.729123 | 1553.0  |
| SR           | 0.692231 | 0.712808  | 0.672972 | 907.0   |
| macro avg    | 0.689728 | 0.690921  | 0.689197 | 4026.0  |
| micro avg    | 0.695562 | 0.695562  | 0.695562 | 4026.0  |
| weighted avg | 0.695445 | 0.695924  | 0.695562 | 4026.0  |

The result of Model Number:Dataset Number:Featuregroup Number:Rescale of 70 : 0 : 3 : 1

|      | f1-score | precision | recall   | support |
|------|----------|-----------|----------|---------|
| AFIB | 0.705263 | 0.753418  | 0.663195 | 204.0   |

GSVT 0.745533 0.730341 0.761436 300.0  
SB 0.764025 0.757327 0.770871 892.0  
SR 0.745179 0.747661 0.742780 681.0  
macro avg 0.740000 0.747187 0.734571 2077.0  
micro avg 0.749722 0.749722 0.749722 2077.0  
weighted avg 0.749403 0.749876 0.749722 2077.0  
The result of Model Number:Dataset Number:Featuregroup Number:Rescale of 70 : 0 : 4 :  
0

f1-score precision recall support  
AFIB 0.728992 0.719701 0.738550 875.0  
GSVT 0.696054 0.700844 0.691348 691.0  
SB 0.736997 0.694408 0.785167 1553.0  
SR 0.601046 0.695394 0.529275 907.0  
macro avg 0.690772 0.702587 0.686085 4026.0  
micro avg 0.701284 0.701284 0.701284 4026.0  
weighted avg 0.697602 0.701232 0.701284 4026.0  
The result of Model Number:Dataset Number:Featuregroup Number:Rescale of 70 : 0 : 4 :  
1

f1-score precision recall support  
AFIB 0.713558 0.722320 0.705118 204.0  
GSVT 0.727931 0.724821 0.731083 300.0  
SB 0.736742 0.734531 0.738970 892.0  
SR 0.730541 0.732280 0.728834 681.0  
macro avg 0.727193 0.728488 0.726001 2077.0  
micro avg 0.731183 0.731183 0.731183 2077.0  
weighted avg 0.731159 0.731191 0.731183 2077.0  
The result of Model Number:Dataset Number:Featuregroup Number:Rescale of 70 : 0 : 5 :  
0

f1-score precision recall support  
AFIB 0.878077 0.882690 0.873564 875.0  
GSVT 0.892895 0.894552 0.891357 691.0  
SB 0.945698 0.938982 0.952516 1553.0  
SR 0.927566 0.933281 0.921942 907.0  
macro avg 0.911059 0.912376 0.909845 4026.0  
micro avg 0.917972 0.917972 0.917972 4026.0  
weighted avg 0.917854 0.917838 0.917972 4026.0  
The result of Model Number:Dataset Number:Featuregroup Number:Rescale of 70 : 0 : 5 :  
1

f1-score precision recall support  
AFIB 0.138349 0.139802 0.136926 175.0  
GSVT 0.138572 0.137100 0.140076 138.2  
SB 0.145941 0.145381 0.146505 310.6  
SR 0.142563 0.143278 0.141856 181.4  
macro avg 0.141356 0.141390 0.141341 805.2

micro avg 0.142272 0.142272 0.142272 805.2  
weighted avg 0.142265 0.142273 0.142272 805.2  
The result of Model Number:Dataset Number:Featuregroup Number:Rescale of 70 : 0 : 6 :  
0

|              | f1-score | precision | recall   | support |
|--------------|----------|-----------|----------|---------|
| AFIB         | 0.886528 | 0.895163  | 0.878273 | 204.0   |
| GSVT         | 0.907029 | 0.902864  | 0.911263 | 300.0   |
| SB           | 0.919563 | 0.916399  | 0.922756 | 892.0   |
| SR           | 0.911797 | 0.915335  | 0.908330 | 681.0   |
| macro avg    | 0.906229 | 0.907440  | 0.905156 | 2077.0  |
| micro avg    | 0.911997 | 0.911997  | 0.911997 | 2077.0  |
| weighted avg | 0.911962 | 0.912010  | 0.911997 | 2077.0  |

The result of Model Number:Dataset Number:Featuregroup Number:Rescale of 70 : 0 : 6 :  
1

|              | f1-score | precision | recall   | support |
|--------------|----------|-----------|----------|---------|
| AFIB         | 0.770456 | 0.778657  | 0.762853 | 204.0   |
| GSVT         | 0.793099 | 0.787814  | 0.798686 | 300.0   |
| SB           | 0.809858 | 0.809134  | 0.810584 | 892.0   |
| SR           | 0.803030 | 0.804101  | 0.801966 | 681.0   |
| macro avg    | 0.794111 | 0.794927  | 0.793523 | 2077.0  |
| micro avg    | 0.801352 | 0.801352  | 0.801352 | 2077.0  |
| weighted avg | 0.801329 | 0.801411  | 0.801352 | 2077.0  |

The result of Model Number:Dataset Number:Featuregroup Number:Rescale of 70 : 0 : 7 :  
0

|              | f1-score | precision | recall   | support |
|--------------|----------|-----------|----------|---------|
| AFIB         | 0.675259 | 0.675356  | 0.675251 | 875.0   |
| GSVT         | 0.687052 | 0.681357  | 0.692895 | 691.0   |
| SB           | 0.719335 | 0.713112  | 0.725678 | 1553.0  |
| SR           | 0.695631 | 0.711345  | 0.680620 | 907.0   |
| macro avg    | 0.694319 | 0.695293  | 0.693611 | 4026.0  |
| micro avg    | 0.698941 | 0.698941  | 0.698941 | 4026.0  |
| weighted avg | 0.698875 | 0.699058  | 0.698941 | 4026.0  |

The result of Model Number:Dataset Number:Featuregroup Number:Rescale of 70 : 0 : 7 :  
1

|              | f1-score | precision | recall   | support |
|--------------|----------|-----------|----------|---------|
| AFIB         | 0.741685 | 0.748358  | 0.735362 | 875.0   |
| GSVT         | 0.756793 | 0.741448  | 0.772965 | 691.0   |
| SB           | 0.802584 | 0.793655  | 0.811812 | 1553.0  |
| SR           | 0.770736 | 0.793647  | 0.749293 | 907.0   |
| macro avg    | 0.767949 | 0.769277  | 0.767358 | 4026.0  |
| micro avg    | 0.774444 | 0.774444  | 0.774444 | 4026.0  |
| weighted avg | 0.774314 | 0.774848  | 0.774444 | 4026.0  |

The result of Model Number:Dataset Number:Featuregroup Number:Rescale of 70 : 0 : 8 :  
0



f1-score precision recall support  
AFIB 0.864623 0.881190 0.848887 204.0  
GSVT 0.892117 0.887522 0.896843 300.0  
SB 0.914180 0.912757 0.915615 892.0  
SR 0.905172 0.904273 0.906102 681.0  
macro avg 0.894023 0.896435 0.891862 2077.0  
micro avg 0.903231 0.903231 0.903231 2077.0  
weighted avg 0.903172 0.903230 0.903231 2077.0  
The result of Model Number:Dataset Number:Featuregroup Number:Rescale of 70 : 0 : 8 :  
1

f1-score precision recall support  
AFIB 0.751892 0.792793 0.715196 204.0  
GSVT 0.789348 0.777410 0.801691 300.0  
SB 0.808106 0.802849 0.813444 892.0  
SR 0.798136 0.798855 0.797437 681.0  
macro avg 0.786871 0.792977 0.781942 2077.0  
micro avg 0.796848 0.796848 0.796848 2077.0  
weighted avg 0.796606 0.796878 0.796848 2077.0  
The result of Model Number:Dataset Number:Featuregroup Number:Rescale of 70 : 0 : 9 :  
0

f1-score precision recall support  
AFIB 0.751715 0.747506 0.756007 875.0  
GSVT 0.757836 0.762307 0.753464 691.0  
SB 0.798318 0.795819 0.800835 1553.0  
SR 0.782514 0.787690 0.777422 907.0  
macro avg 0.772595 0.773331 0.771932 4026.0  
micro avg 0.777687 0.777687 0.777687 4026.0  
weighted avg 0.777681 0.777736 0.777687 4026.0  
The result of Model Number:Dataset Number:Featuregroup Number:Rescale of 70 : 0 : 9 :  
1

f1-score precision recall support  
AFIB 0.844998 0.862795 0.828054 204.0  
GSVT 0.871270 0.863310 0.879398 300.0  
SB 0.885500 0.883526 0.887485 892.0  
SR 0.874976 0.875891 0.874073 681.0  
macro avg 0.869186 0.871381 0.867253 2077.0  
micro avg 0.876083 0.876083 0.876083 2077.0  
weighted avg 0.876016 0.876067 0.876083 2077.0  
The result of Model Number:Dataset Number:Featuregroup Number:Rescale of 70 : 0 :  
10 : 0

f1-score precision recall support  
AFIB 0.665801 0.695392 0.638718 204.0  
GSVT 0.693546 0.688102 0.699093 300.0  
SB 0.704140 0.698708 0.709664 892.0

SR 0.696350 0.697500 0.695229 681.0  
macro avg 0.689959 0.694926 0.685676 2077.0  
micro avg 0.696436 0.696436 0.696436 2077.0  
weighted avg 0.696290 0.696454 0.696436 2077.0  
The result of Model Number:Dataset Number:Featuregroup Number:Rescale of 70 : 0 :  
10 : 1

f1-score precision recall support  
AFIB 0.924092 0.925131 0.923223 204.0  
GSVT 0.945308 0.943197 0.947500 300.0  
SB 0.965344 0.964056 0.966642 892.0  
SR 0.958115 0.960528 0.955726 681.0  
macro avg 0.948215 0.948228 0.948272 2077.0  
micro avg 0.956033 0.956033 0.956033 2077.0  
weighted avg 0.956028 0.956063 0.956033 2077.0

The result of Model Number:Dataset Number:Featuregroup Number:Rescale of 70 : 1 : 0 :  
0

f1-score precision recall support  
AFIB 0.741366 0.783540 0.703991 204.0  
GSVT 0.783456 0.774829 0.792317 300.0  
SB 0.795110 0.787199 0.803210 892.0  
SR 0.785874 0.788560 0.783329 681.0  
macro avg 0.776451 0.783532 0.770712 2077.0  
micro avg 0.785373 0.785373 0.785373 2077.0  
weighted avg 0.785120 0.785499 0.785373 2077.0

The result of Model Number:Dataset Number:Featuregroup Number:Rescale of 70 : 1 : 0 :  
1

f1-score precision recall support  
AFIB 0.820214 0.809742 0.831008 875.0  
GSVT 0.834611 0.839397 0.829901 691.0  
SB 0.893399 0.889647 0.897192 1553.0  
SR 0.867094 0.881128 0.853514 907.0  
macro avg 0.853829 0.854979 0.852904 4026.0  
micro avg 0.861418 0.861418 0.861418 4026.0  
weighted avg 0.861477 0.861737 0.861418 4026.0

The result of Model Number:Dataset Number:Featuregroup Number:Rescale of 70 : 1 : 1 :  
0

f1-score precision recall support  
AFIB 0.663626 0.664740 0.680074 204.0  
GSVT 0.657387 0.682898 0.634561 300.0  
SB 0.697302 0.659061 0.740539 892.0  
SR 0.604412 0.660191 0.558854 681.0  
macro avg 0.655682 0.666722 0.653507 2077.0  
micro avg 0.659723 0.659723 0.659723 2077.0  
weighted avg 0.657773 0.663432 0.659723 2077.0

The result of Model Number:Dataset Number:Featuregroup Number:Rescale of 70 : 1 : 1 : 1

|              | f1-score | precision | recall   | support |
|--------------|----------|-----------|----------|---------|
| AFIB         | 0.597148 | 0.620352  | 0.575660 | 875.0   |
| GSVT         | 0.641953 | 0.637212  | 0.646850 | 691.0   |
| SB           | 0.705457 | 0.701823  | 0.709135 | 1553.0  |
| SR           | 0.663899 | 0.651239  | 0.677133 | 907.0   |
| macro avg    | 0.652114 | 0.652657  | 0.652194 | 4026.0  |
| micro avg    | 0.662226 | 0.662226  | 0.662226 | 4026.0  |
| weighted avg | 0.661656 | 0.661631  | 0.662226 | 4026.0  |

The result of Model Number:Dataset Number:Featuregroup Number:Rescale of 70 : 1 : 2 : 0

|              | f1-score | precision | recall   | support |
|--------------|----------|-----------|----------|---------|
| AFIB         | 0.683738 | 0.676183  | 0.691477 | 875.0   |
| GSVT         | 0.696057 | 0.700342  | 0.691835 | 691.0   |
| SB           | 0.740819 | 0.739586  | 0.742059 | 1553.0  |
| SR           | 0.722780 | 0.729539  | 0.716164 | 907.0   |
| macro avg    | 0.710848 | 0.711413  | 0.710384 | 4026.0  |
| micro avg    | 0.716612 | 0.716612  | 0.716612 | 4026.0  |
| weighted avg | 0.716667 | 0.716807  | 0.716612 | 4026.0  |

The result of Model Number:Dataset Number:Featuregroup Number:Rescale of 70 : 1 : 2 : 1

|              | f1-score | precision | recall   | support |
|--------------|----------|-----------|----------|---------|
| AFIB         | 0.739567 | 0.746721  | 0.732682 | 204.0   |
| GSVT         | 0.765737 | 0.764227  | 0.767265 | 300.0   |
| SB           | 0.781742 | 0.780357  | 0.783142 | 892.0   |
| SR           | 0.774535 | 0.774910  | 0.774194 | 681.0   |
| macro avg    | 0.765395 | 0.766554  | 0.764321 | 2077.0  |
| micro avg    | 0.772959 | 0.772959  | 0.772959 | 2077.0  |
| weighted avg | 0.772925 | 0.772938  | 0.772959 | 2077.0  |

The result of Model Number:Dataset Number:Featuregroup Number:Rescale of 70 : 1 : 3 : 0

|              | f1-score | precision | recall   | support |
|--------------|----------|-----------|----------|---------|
| AFIB         | 0.791105 | 0.794335  | 0.787925 | 875.0   |
| GSVT         | 0.736671 | 0.769183  | 0.706917 | 691.0   |
| SB           | 0.791141 | 0.716671  | 0.882893 | 1553.0  |
| SR           | 0.596785 | 0.742755  | 0.498966 | 907.0   |
| macro avg    | 0.728925 | 0.755736  | 0.719175 | 4026.0  |
| micro avg    | 0.745556 | 0.745556  | 0.745556 | 4026.0  |
| weighted avg | 0.737998 | 0.748439  | 0.745556 | 4026.0  |

The result of Model Number:Dataset Number:Featuregroup Number:Rescale of 70 : 1 : 3 : 1

|      | f1-score | precision | recall   | support |
|------|----------|-----------|----------|---------|
| AFIB | 0.654514 | 0.698878  | 0.615881 | 204.0   |

GSVT 0.616707 0.635005 0.599666 300.0  
SB 0.644613 0.613668 0.679211 892.0  
SR 0.571975 0.597943 0.548792 681.0  
macro avg 0.621952 0.636374 0.610888 2077.0  
micro avg 0.618740 0.618740 0.618740 2077.0  
weighted avg 0.617738 0.619964 0.618740 2077.0  
The result of Model Number:Dataset Number:Featuregroup Number:Rescale of 70 : 1 : 4 :  
0

f1-score precision recall support

AFIB 0.638593 0.634572 0.719331 204.0  
GSVT 0.778456 0.774452 0.782633 300.0  
SB 0.800621 0.796812 0.804476 892.0  
SR 0.627997 0.630066 0.626320 681.0  
macro avg 0.711417 0.708975 0.733190 2077.0  
micro avg 0.734545 0.734545 0.734545 2077.0  
weighted avg 0.724906 0.722975 0.734545 2077.0  
The result of Model Number:Dataset Number:Featuregroup Number:Rescale of 70 : 1 : 4 :  
1

f1-score precision recall support

AFIB 0.872424 0.880229 0.864865 875.0  
GSVT 0.889087 0.872181 0.906831 691.0  
SB 0.943691 0.935516 0.952014 1553.0  
SR 0.904931 0.925738 0.885080 907.0  
macro avg 0.902533 0.903416 0.902197 4026.0  
micro avg 0.910239 0.910239 0.910239 4026.0  
weighted avg 0.910098 0.910427 0.910239 4026.0  
The result of Model Number:Dataset Number:Featuregroup Number:Rescale of 70 : 1 : 5 :  
0

f1-score precision recall support

AFIB 0.756879 0.760483 0.753342 875.0  
GSVT 0.766229 0.752304 0.780757 691.0  
SB 0.810728 0.807623 0.813859 1553.0  
SR 0.786765 0.800232 0.773756 907.0  
macro avg 0.780150 0.780160 0.780429 4026.0  
micro avg 0.785990 0.785990 0.785990 4026.0  
weighted avg 0.785988 0.786218 0.785990 4026.0  
The result of Model Number:Dataset Number:Featuregroup Number:Rescale of 70 : 1 : 5 :  
1

f1-score precision recall support

AFIB 0.712445 0.713679 0.711225 875.0  
GSVT 0.721083 0.712797 0.729623 691.0  
SB 0.759325 0.750169 0.768711 1553.0  
SR 0.723232 0.745146 0.702587 907.0  
macro avg 0.729021 0.730448 0.728037 4026.0

micro avg 0.734611 0.734611 0.734611 4026.0  
weighted avg 0.734442 0.734693 0.734611 4026.0  
The result of Model Number:Dataset Number:Featuregroup Number:Rescale of 70 : 1 : 6 :  
0

|              | f1-score | precision | recall   | support |
|--------------|----------|-----------|----------|---------|
| AFIB         | 0.935659 | 0.947148  | 0.924592 | 204.0   |
| GSVT         | 0.954505 | 0.950428  | 0.958640 | 300.0   |
| SB           | 0.966059 | 0.963160  | 0.968981 | 892.0   |
| SR           | 0.957928 | 0.960208  | 0.955690 | 681.0   |
| macro avg    | 0.953538 | 0.955236  | 0.951976 | 2077.0  |
| micro avg    | 0.958770 | 0.958770  | 0.958770 | 2077.0  |
| weighted avg | 0.958739 | 0.958780  | 0.958770 | 2077.0  |

The result of Model Number:Dataset Number:Featuregroup Number:Rescale of 70 : 1 : 6 :  
1

|              | f1-score | precision | recall   | support |
|--------------|----------|-----------|----------|---------|
| AFIB         | 0.752912 | 0.777915  | 0.729752 | 204.0   |
| GSVT         | 0.781485 | 0.775216  | 0.787974 | 300.0   |
| SB           | 0.798751 | 0.795469  | 0.802063 | 892.0   |
| SR           | 0.791291 | 0.791175  | 0.791408 | 681.0   |
| macro avg    | 0.781110 | 0.784944  | 0.777799 | 2077.0  |
| micro avg    | 0.789432 | 0.789432  | 0.789432 | 2077.0  |
| weighted avg | 0.789309 | 0.789412  | 0.789432 | 2077.0  |

The result of Model Number:Dataset Number:Featuregroup Number:Rescale of 70 : 1 : 7 :  
0

|              | f1-score | precision | recall   | support |
|--------------|----------|-----------|----------|---------|
| AFIB         | 0.869289 | 0.878555  | 0.860359 | 204.0   |
| GSVT         | 0.885276 | 0.880419  | 0.890284 | 300.0   |
| SB           | 0.905711 | 0.904201  | 0.907231 | 892.0   |
| SR           | 0.898161 | 0.899624  | 0.896714 | 681.0   |
| macro avg    | 0.889609 | 0.890700  | 0.888647 | 2077.0  |
| micro avg    | 0.896731 | 0.896731  | 0.896731 | 2077.0  |
| weighted avg | 0.896706 | 0.896746  | 0.896731 | 2077.0  |

The result of Model Number:Dataset Number:Featuregroup Number:Rescale of 70 : 1 : 7 :  
1

|              | f1-score | precision | recall   | support |
|--------------|----------|-----------|----------|---------|
| AFIB         | 0.728504 | 0.739094  | 0.718543 | 204.0   |
| GSVT         | 0.744570 | 0.734497  | 0.754984 | 300.0   |
| SB           | 0.755776 | 0.747900  | 0.763826 | 892.0   |
| SR           | 0.740797 | 0.753055  | 0.728944 | 681.0   |
| macro avg    | 0.742412 | 0.743637  | 0.741574 | 2077.0  |
| micro avg    | 0.746664 | 0.746664  | 0.746664 | 2077.0  |
| weighted avg | 0.746568 | 0.746789  | 0.746664 | 2077.0  |

The result of Model Number:Dataset Number:Featuregroup Number:Rescale of 70 : 1 : 8 :  
0

|              | f1-score | precision | recall   | support |
|--------------|----------|-----------|----------|---------|
| AFIB         | 0.663868 | 0.655054  | 0.672973 | 875.0   |
| GSVT         | 0.677342 | 0.683763  | 0.671070 | 691.0   |
| SB           | 0.720789 | 0.719084  | 0.722506 | 1553.0  |
| SR           | 0.701235 | 0.708608  | 0.694043 | 907.0   |
| macro avg    | 0.690808 | 0.691628  | 0.690148 | 4026.0  |
| micro avg    | 0.696500 | 0.696500  | 0.696500 | 4026.0  |
| weighted avg | 0.696556 | 0.696746  | 0.696500 | 4026.0  |

The result of Model Number:Dataset Number:Featuregroup Number:Rescale of 70 : 1 : 8 : 1

|              | f1-score | precision | recall   | support |
|--------------|----------|-----------|----------|---------|
| AFIB         | 0.733641 | 0.773549  | 0.697836 | 204.0   |
| GSVT         | 0.770187 | 0.758539  | 0.782230 | 300.0   |
| SB           | 0.788490 | 0.783361  | 0.793699 | 892.0   |
| SR           | 0.778762 | 0.779464  | 0.778080 | 681.0   |
| macro avg    | 0.767770 | 0.773728  | 0.762961 | 2077.0  |
| micro avg    | 0.777506 | 0.777506  | 0.777506 | 2077.0  |
| weighted avg | 0.777270 | 0.777534  | 0.777506 | 2077.0  |

The result of Model Number:Dataset Number:Featuregroup Number:Rescale of 70 : 1 : 9 : 0

|              | f1-score | precision | recall   | support |
|--------------|----------|-----------|----------|---------|
| AFIB         | 0.765102 | 0.860289  | 0.689555 | 204.0   |
| GSVT         | 0.907737 | 0.888354  | 0.928026 | 300.0   |
| SB           | 0.969027 | 0.964087  | 0.974022 | 892.0   |
| SR           | 0.947287 | 0.935291  | 0.959656 | 681.0   |
| macro avg    | 0.897288 | 0.912005  | 0.887815 | 2077.0  |
| micro avg    | 0.934728 | 0.934728  | 0.934728 | 2077.0  |
| weighted avg | 0.933017 | 0.933512  | 0.934728 | 2077.0  |

The result of Model Number:Dataset Number:Featuregroup Number:Rescale of 70 : 1 : 9 : 1

|              | f1-score | precision | recall   | support |
|--------------|----------|-----------|----------|---------|
| AFIB         | 0.856827 | 0.877675  | 0.837159 | 204.0   |
| GSVT         | 0.867598 | 0.855654  | 0.879996 | 300.0   |
| SB           | 0.885117 | 0.876278  | 0.894142 | 892.0   |
| SR           | 0.869663 | 0.881076  | 0.858567 | 681.0   |
| macro avg    | 0.869801 | 0.872671  | 0.867466 | 2077.0  |
| micro avg    | 0.874838 | 0.874838  | 0.874838 | 2077.0  |
| weighted avg | 0.874741 | 0.875009  | 0.874838 | 2077.0  |

The result of Model Number:Dataset Number:Featuregroup Number:Rescale of 70 : 1 : 10 : 0

|      | f1-score | precision | recall   | support |
|------|----------|-----------|----------|---------|
| AFIB | 0.792109 | 0.794540  | 0.789818 | 204.0   |
| GSVT | 0.812917 | 0.810852  | 0.815066 | 300.0   |
| SB   | 0.831077 | 0.830062  | 0.832100 | 892.0   |

SR 0.824275 0.825860 0.822703 681.0  
macro avg 0.815095 0.815328 0.814922 2077.0  
micro avg 0.822406 0.822406 0.822406 2077.0  
weighted avg 0.822397 0.822421 0.822406 2077.0  
The result of Model Number:Dataset Number:Featuregroup Number:Rescale of 70 : 1 :  
10 : 1

f1-score precision recall support  
AFIB 0.748816 0.750263 0.747431 875.0  
GSVT 0.725476 0.722289 0.728735 691.0  
SB 0.758036 0.711963 0.810507 1553.0  
SR 0.610113 0.706943 0.536758 907.0  
macro avg 0.710610 0.722865 0.705858 4026.0  
micro avg 0.721091 0.721091 0.721091 4026.0  
weighted avg 0.717119 0.720928 0.721091 4026.0

The result of Model Number:Dataset Number:Featuregroup Number:Rescale of 71 : 0 : 0 :  
0

f1-score precision recall support  
AFIB 0.861183 0.852520 0.870047 875.0  
GSVT 0.868889 0.876626 0.861352 691.0  
SB 0.919247 0.916425 0.922087 1553.0  
SR 0.901446 0.909336 0.893694 907.0  
macro avg 0.887691 0.888727 0.886795 4026.0  
micro avg 0.893956 0.893956 0.893956 4026.0  
weighted avg 0.893974 0.894108 0.893956 4026.0

The result of Model Number:Dataset Number:Featuregroup Number:Rescale of 71 : 0 : 0 :  
1

f1-score precision recall support  
AFIB 0.655026 0.641978 0.668650 875.0  
GSVT 0.533134 0.495786 0.668268 691.0  
SB 0.432579 0.433324 0.431837 1553.0  
SR 0.701266 0.707441 0.695227 907.0  
macro avg 0.580501 0.569632 0.615995 4026.0  
micro avg 0.583223 0.583223 0.583223 4026.0  
weighted avg 0.558715 0.551148 0.583223 4026.0

The result of Model Number:Dataset Number:Featuregroup Number:Rescale of 71 : 0 : 1 :  
0

f1-score precision recall support  
AFIB 0.650417 0.677573 0.625472 875.0  
GSVT 0.702678 0.699120 0.706357 691.0  
SB 0.770507 0.766171 0.774914 1553.0  
SR 0.721464 0.705444 0.738241 907.0  
macro avg 0.711267 0.712077 0.711246 4026.0  
micro avg 0.722406 0.722406 0.722406 4026.0  
weighted avg 0.721717 0.721726 0.722406 4026.0

The result of Model Number:Dataset Number:Featuregroup Number:Rescale of 71 : 0 : 1 : 1

|              | f1-score | precision | recall   | support |
|--------------|----------|-----------|----------|---------|
| AFIB         | 0.662682 | 0.667147  | 0.658375 | 875.0   |
| GSVT         | 0.674509 | 0.665140  | 0.684269 | 691.0   |
| SB           | 0.718763 | 0.713841  | 0.723759 | 1553.0  |
| SR           | 0.689635 | 0.701548  | 0.678158 | 907.0   |
| macro avg    | 0.686397 | 0.686919  | 0.686140 | 4026.0  |
| micro avg    | 0.692498 | 0.692498  | 0.692498 | 4026.0  |
| weighted avg | 0.692417 | 0.692565  | 0.692498 | 4026.0  |

The result of Model Number:Dataset Number:Featuregroup Number:Rescale of 71 : 0 : 2 : 0

|              | f1-score | precision | recall   | support |
|--------------|----------|-----------|----------|---------|
| AFIB         | 0.914202 | 0.919220  | 0.909298 | 875.0   |
| GSVT         | 0.915481 | 0.903907  | 0.927499 | 691.0   |
| SB           | 0.962787 | 0.958923  | 0.966690 | 1553.0  |
| SR           | 0.942119 | 0.953556  | 0.931011 | 907.0   |
| macro avg    | 0.933647 | 0.933901  | 0.933624 | 4026.0  |
| micro avg    | 0.939452 | 0.939452  | 0.939452 | 4026.0  |
| weighted avg | 0.939452 | 0.939642  | 0.939452 | 4026.0  |

The result of Model Number:Dataset Number:Featuregroup Number:Rescale of 71 : 0 : 2 : 1

|              | f1-score | precision | recall   | support |
|--------------|----------|-----------|----------|---------|
| AFIB         | 0.874715 | 0.883236  | 0.866570 | 204.0   |
| GSVT         | 0.894943 | 0.890834  | 0.899121 | 300.0   |
| SB           | 0.907310 | 0.904189  | 0.910460 | 892.0   |
| SR           | 0.899648 | 0.903138  | 0.896227 | 681.0   |
| macro avg    | 0.894154 | 0.895349  | 0.893095 | 2077.0  |
| micro avg    | 0.899845 | 0.899845  | 0.899845 | 2077.0  |
| weighted avg | 0.899810 | 0.899857  | 0.899845 | 2077.0  |

The result of Model Number:Dataset Number:Featuregroup Number:Rescale of 71 : 0 : 3 : 0

|              | f1-score | precision | recall   | support |
|--------------|----------|-----------|----------|---------|
| AFIB         | 0.826337 | 0.842196  | 0.811112 | 875.0   |
| GSVT         | 0.880849 | 0.882193  | 0.879565 | 691.0   |
| SB           | 0.959132 | 0.954917  | 0.963391 | 1553.0  |
| SR           | 0.906350 | 0.896497  | 0.916515 | 907.0   |
| macro avg    | 0.893167 | 0.893951  | 0.892646 | 4026.0  |
| micro avg    | 0.905347 | 0.905347  | 0.905347 | 4026.0  |
| weighted avg | 0.904944 | 0.904775  | 0.905347 | 4026.0  |

The result of Model Number:Dataset Number:Featuregroup Number:Rescale of 71 : 0 : 3 : 1

|      | f1-score | precision | recall   | support |
|------|----------|-----------|----------|---------|
| AFIB | 0.711319 | 0.725102  | 0.698369 | 204.0   |



GSVT 0.738902 0.732724 0.745321 300.0  
SB 0.752689 0.751179 0.754208 892.0  
SR 0.745512 0.746284 0.744745 681.0  
macro avg 0.737105 0.738822 0.735661 2077.0  
micro avg 0.744337 0.744337 0.744337 2077.0  
weighted avg 0.744281 0.744347 0.744337 2077.0  
The result of Model Number:Dataset Number:Featuregroup Number:Rescale of 71 : 0 : 4 :  
0

f1-score precision recall support

AFIB 0.724238 0.729118 0.719531 875.0  
GSVT 0.737163 0.726924 0.747830 691.0  
SB 0.785528 0.780149 0.790988 1553.0  
SR 0.753695 0.766714 0.741152 907.0  
macro avg 0.750156 0.750726 0.749875 4026.0  
micro avg 0.756823 0.756823 0.756823 4026.0  
weighted avg 0.756735 0.756896 0.756823 4026.0

The result of Model Number:Dataset Number:Featuregroup Number:Rescale of 71 : 0 : 4 :  
1

f1-score precision recall support

AFIB 0.647888 0.648061 0.647828 875.0  
GSVT 0.659170 0.656737 0.661705 691.0  
SB 0.705184 0.703472 0.706907 1553.0  
SR 0.688366 0.693306 0.683514 907.0  
macro avg 0.675152 0.675394 0.674989 4026.0  
micro avg 0.681039 0.681039 0.681039 4026.0  
weighted avg 0.681045 0.681117 0.681039 4026.0

The result of Model Number:Dataset Number:Featuregroup Number:Rescale of 71 : 0 : 5 :  
0

f1-score precision recall support

AFIB 0.824170 0.832198 0.816496 204.0  
GSVT 0.843229 0.839357 0.847165 300.0  
SB 0.854882 0.851941 0.857850 892.0  
SR 0.847662 0.850951 0.844439 681.0  
macro avg 0.842486 0.843612 0.841488 2077.0  
micro avg 0.847848 0.847848 0.847848 2077.0  
weighted avg 0.847815 0.847859 0.847848 2077.0

The result of Model Number:Dataset Number:Featuregroup Number:Rescale of 71 : 0 : 5 :  
1

f1-score precision recall support

AFIB 0.745905 0.746104 0.745836 875.0  
GSVT 0.758894 0.756092 0.761812 691.0  
SB 0.811868 0.809897 0.813852 1553.0  
SR 0.792506 0.798194 0.786921 907.0  
macro avg 0.777293 0.777572 0.777105 4026.0

micro avg 0.784071 0.784071 0.784071 4026.0  
weighted avg 0.784078 0.784161 0.784071 4026.0  
The result of Model Number:Dataset Number:Featuregroup Number:Rescale of 71 : 0 : 6 :  
0

|              | f1-score | precision | recall   | support |
|--------------|----------|-----------|----------|---------|
| AFIB         | 0.650003 | 0.640216  | 0.665506 | 875.0   |
| GSVT         | 0.620635 | 0.618829  | 0.625930 | 691.0   |
| SB           | 0.662759 | 0.617585  | 0.720574 | 1553.0  |
| SR           | 0.490947 | 0.656250  | 0.406808 | 907.0   |
| macro avg    | 0.606086 | 0.633220  | 0.604704 | 4026.0  |
| micro avg    | 0.621674 | 0.621674  | 0.621674 | 4026.0  |
| weighted avg | 0.614050 | 0.631428  | 0.621674 | 4026.0  |

The result of Model Number:Dataset Number:Featuregroup Number:Rescale of 71 : 0 : 6 :  
1

|              | f1-score | precision | recall   | support |
|--------------|----------|-----------|----------|---------|
| AFIB         | 0.770248 | 0.770935  | 0.769641 | 875.0   |
| GSVT         | 0.784357 | 0.786415  | 0.782442 | 691.0   |
| SB           | 0.832605 | 0.827062  | 0.838232 | 1553.0  |
| SR           | 0.816383 | 0.823836  | 0.809092 | 907.0   |
| macro avg    | 0.800898 | 0.802062  | 0.799852 | 4026.0  |
| micro avg    | 0.807184 | 0.807184  | 0.807184 | 4026.0  |
| weighted avg | 0.807117 | 0.807160  | 0.807184 | 4026.0  |

The result of Model Number:Dataset Number:Featuregroup Number:Rescale of 71 : 0 : 7 :  
0

|              | f1-score | precision | recall   | support |
|--------------|----------|-----------|----------|---------|
| AFIB         | 0.923183 | 0.930883  | 0.915927 | 204.0   |
| GSVT         | 0.947571 | 0.943207  | 0.951995 | 300.0   |
| SB           | 0.961861 | 0.958444  | 0.965308 | 892.0   |
| SR           | 0.952977 | 0.957245  | 0.948796 | 681.0   |
| macro avg    | 0.946398 | 0.947445  | 0.945507 | 2077.0  |
| micro avg    | 0.953121 | 0.953121  | 0.953121 | 2077.0  |
| weighted avg | 0.953085 | 0.953143  | 0.953121 | 2077.0  |

The result of Model Number:Dataset Number:Featuregroup Number:Rescale of 71 : 0 : 7 :  
1

|              | f1-score | precision | recall   | support |
|--------------|----------|-----------|----------|---------|
| AFIB         | 0.831519 | 0.834380  | 0.828783 | 875.0   |
| GSVT         | 0.847305 | 0.830401  | 0.865066 | 691.0   |
| SB           | 0.896941 | 0.892090  | 0.901849 | 1553.0  |
| SR           | 0.862249 | 0.882297  | 0.843143 | 907.0   |
| macro avg    | 0.859503 | 0.859792  | 0.859710 | 4026.0  |
| micro avg    | 0.866430 | 0.866430  | 0.866430 | 4026.0  |
| weighted avg | 0.866387 | 0.866753  | 0.866430 | 4026.0  |

The result of Model Number:Dataset Number:Featuregroup Number:Rescale of 71 : 0 : 8 :  
0

f1-score precision recall support  
AFIB 0.746769 0.753282 0.740555 204.0  
GSVT 0.772595 0.771334 0.773879 300.0  
SB 0.789017 0.787093 0.790961 892.0  
SR 0.781784 0.782962 0.780635 681.0  
macro avg 0.772541 0.773668 0.771507 2077.0  
micro avg 0.780157 0.780157 0.780157 2077.0  
weighted avg 0.780124 0.780141 0.780157 2077.0  
The result of Model Number:Dataset Number:Featuregroup Number:Rescale of 71 : 0 : 8 :  
1

f1-score precision recall support  
AFIB 0.896591 0.902994 0.890441 204.0  
GSVT 0.927943 0.927344 0.928560 300.0  
SB 0.946509 0.944409 0.948628 892.0  
SR 0.938048 0.939183 0.936945 681.0  
macro avg 0.927273 0.928482 0.926143 2077.0  
micro avg 0.936184 0.936184 0.936184 2077.0  
weighted avg 0.936150 0.936163 0.936184 2077.0  
The result of Model Number:Dataset Number:Featuregroup Number:Rescale of 71 : 0 : 9 :  
0

f1-score precision recall support  
AFIB 0.812146 0.815184 0.809476 875.0  
GSVT 0.830427 0.838439 0.822734 691.0  
SB 0.883004 0.873742 0.892532 1553.0  
SR 0.852427 0.859929 0.845347 907.0  
macro avg 0.844501 0.846823 0.842522 4026.0  
micro avg 0.851871 0.851871 0.851871 4026.0  
weighted avg 0.851691 0.851844 0.851871 4026.0  
The result of Model Number:Dataset Number:Featuregroup Number:Rescale of 71 : 0 : 9 :  
1

f1-score precision recall support  
AFIB 0.662778 0.712601 0.620157 204.0  
GSVT 0.632071 0.652134 0.613302 300.0  
SB 0.658528 0.625942 0.694700 892.0  
SR 0.582946 0.608002 0.559932 681.0  
macro avg 0.634081 0.649670 0.622023 2077.0  
micro avg 0.631434 0.631434 0.631434 2077.0  
weighted avg 0.630342 0.632355 0.631434 2077.0  
The result of Model Number:Dataset Number:Featuregroup Number:Rescale of 71 : 0 :  
10 : 0

f1-score precision recall support  
AFIB 0.710363 0.719486 0.701503 875.0  
GSVT 0.718221 0.712413 0.724240 691.0  
SB 0.768291 0.765982 0.770617 1553.0

SR 0.749267 0.748952 0.749592 907.0  
macro avg 0.736536 0.736708 0.736488 4026.0  
micro avg 0.742900 0.742900 0.742900 4026.0  
weighted avg 0.742822 0.742846 0.742900 4026.0  
The result of Model Number:Dataset Number:Featuregroup Number:Rescale of 71 : 0 :  
10 : 1

f1-score precision recall support  
AFIB 0.749861 0.739223 0.760828 875.0  
GSVT 0.765288 0.772747 0.757978 691.0  
SB 0.814416 0.811762 0.817089 1553.0  
SR 0.795397 0.805563 0.785493 907.0  
macro avg 0.781241 0.782324 0.780347 4026.0  
micro avg 0.787598 0.787598 0.787598 4026.0  
weighted avg 0.787669 0.787904 0.787598 4026.0  
The result of Model Number:Dataset Number:Featuregroup Number:Rescale of 71 : 1 : 0 :  
0

f1-score precision recall support  
AFIB 0.741493 0.730328 0.759178 875.0  
GSVT 0.707992 0.705931 0.714032 691.0  
SB 0.756044 0.704513 0.821997 1553.0  
SR 0.560049 0.748620 0.464068 907.0  
macro avg 0.691395 0.722348 0.689819 4026.0  
micro avg 0.709177 0.709177 0.709177 4026.0  
weighted avg 0.700480 0.720304 0.709177 4026.0  
The result of Model Number:Dataset Number:Featuregroup Number:Rescale of 71 : 1 : 0 :  
1

f1-score precision recall support  
AFIB 0.758672 0.759032 0.758420 875.0  
GSVT 0.778320 0.771583 0.785202 691.0  
SB 0.831248 0.825191 0.837403 1553.0  
SR 0.795736 0.811555 0.780564 907.0  
macro avg 0.790994 0.791840 0.790397 4026.0  
micro avg 0.798472 0.798472 0.798472 4026.0  
weighted avg 0.798390 0.798539 0.798472 4026.0  
The result of Model Number:Dataset Number:Featuregroup Number:Rescale of 71 : 1 : 1 :  
0

f1-score precision recall support  
AFIB 0.827188 0.849046 0.806509 204.0  
GSVT 0.849873 0.842813 0.857208 300.0  
SB 0.873292 0.870088 0.876523 892.0  
SR 0.859771 0.860812 0.858754 681.0  
macro avg 0.852531 0.855690 0.849749 2077.0  
micro avg 0.861031 0.861031 0.861031 2077.0  
weighted avg 0.860948 0.861040 0.861031 2077.0

The result of Model Number:Dataset Number:Featuregroup Number:Rescale of 71 : 1 : 1 : 1

|              | f1-score | precision | recall   | support |
|--------------|----------|-----------|----------|---------|
| AFIB         | 0.857344 | 0.847870  | 0.867048 | 875.0   |
| GSVT         | 0.872790 | 0.878164  | 0.867497 | 691.0   |
| SB           | 0.928918 | 0.927372  | 0.930474 | 1553.0  |
| SR           | 0.906300 | 0.914774  | 0.898004 | 907.0   |
| macro avg    | 0.891338 | 0.892045  | 0.890755 | 4026.0  |
| micro avg    | 0.898565 | 0.898565  | 0.898565 | 4026.0  |
| weighted avg | 0.898633 | 0.898810  | 0.898565 | 4026.0  |

The result of Model Number:Dataset Number:Featuregroup Number:Rescale of 71 : 1 : 2 : 0

|              | f1-score | precision | recall   | support |
|--------------|----------|-----------|----------|---------|
| AFIB         | 0.913416 | 0.918429  | 0.908516 | 875.0   |
| GSVT         | 0.914694 | 0.903129  | 0.926701 | 691.0   |
| SB           | 0.961958 | 0.958098  | 0.965858 | 1553.0  |
| SR           | 0.941308 | 0.952735  | 0.930211 | 907.0   |
| macro avg    | 0.932844 | 0.933098  | 0.932821 | 4026.0  |
| micro avg    | 0.938644 | 0.938644  | 0.938644 | 4026.0  |
| weighted avg | 0.938644 | 0.938834  | 0.938644 | 4026.0  |

The result of Model Number:Dataset Number:Featuregroup Number:Rescale of 71 : 1 : 2 : 1

|              | f1-score | precision | recall   | support |
|--------------|----------|-----------|----------|---------|
| AFIB         | 0.921597 | 0.929999  | 0.913467 | 204.0   |
| GSVT         | 0.945648 | 0.942551  | 0.948794 | 300.0   |
| SB           | 0.962935 | 0.962293  | 0.963581 | 892.0   |
| SR           | 0.954466 | 0.954192  | 0.954754 | 681.0   |
| macro avg    | 0.946161 | 0.947259  | 0.945149 | 2077.0  |
| micro avg    | 0.953629 | 0.953629  | 0.953629 | 2077.0  |
| weighted avg | 0.953601 | 0.953613  | 0.953629 | 2077.0  |

The result of Model Number:Dataset Number:Featuregroup Number:Rescale of 71 : 1 : 3 : 0

|              | f1-score | precision | recall   | support |
|--------------|----------|-----------|----------|---------|
| AFIB         | 0.677533 | 0.683630  | 0.671757 | 875.0   |
| GSVT         | 0.691335 | 0.677317  | 0.706108 | 691.0   |
| SB           | 0.733165 | 0.725009  | 0.741595 | 1553.0  |
| SR           | 0.704072 | 0.725001  | 0.684483 | 907.0   |
| macro avg    | 0.701526 | 0.702739  | 0.700986 | 4026.0  |
| micro avg    | 0.707460 | 0.707460  | 0.707460 | 4026.0  |
| weighted avg | 0.707340 | 0.707828  | 0.707460 | 4026.0  |

The result of Model Number:Dataset Number:Featuregroup Number:Rescale of 71 : 1 : 3 : 1

|      | f1-score | precision | recall   | support |
|------|----------|-----------|----------|---------|
| AFIB | 0.671155 | 0.676475  | 0.665935 | 875.0   |

GSVT 0.679664 0.676667 0.682710 691.0  
SB 0.722742 0.719885 0.725627 1553.0  
SR 0.704982 0.706974 0.703035 907.0  
macro avg 0.694636 0.695000 0.694327 4026.0  
micro avg 0.700198 0.700198 0.700198 4026.0  
weighted avg 0.700135 0.700124 0.700198 4026.0  
The result of Model Number:Dataset Number:Featuregroup Number:Rescale of 71 : 1 : 4 :  
0

f1-score precision recall support  
AFIB 0.826682 0.851753 0.803080 875.0  
GSVT 0.882495 0.876375 0.888748 691.0  
SB 0.965557 0.961864 0.969286 1553.0  
SR 0.913184 0.899478 0.927368 907.0  
macro avg 0.896980 0.897367 0.897121 4026.0  
micro avg 0.909897 0.909897 0.909897 4026.0  
weighted avg 0.909319 0.909205 0.909897 4026.0  
The result of Model Number:Dataset Number:Featuregroup Number:Rescale of 71 : 1 : 4 :  
1

f1-score precision recall support  
AFIB 0.695376 0.696622 0.694157 875.0  
GSVT 0.665870 0.669367 0.662427 691.0  
SB 0.704328 0.665584 0.747869 1553.0  
SR 0.584948 0.658402 0.526290 907.0  
macro avg 0.662630 0.672494 0.657686 4026.0  
micro avg 0.671612 0.671612 0.671612 4026.0  
weighted avg 0.668887 0.671361 0.671612 4026.0  
The result of Model Number:Dataset Number:Featuregroup Number:Rescale of 71 : 1 : 5 :  
0

f1-score precision recall support  
AFIB 0.814394 0.815496 0.813451 875.0  
GSVT 0.827079 0.826653 0.827535 691.0  
SB 0.863798 0.860707 0.866914 1553.0  
SR 0.843113 0.847839 0.838494 907.0  
macro avg 0.837096 0.837674 0.836598 4026.0  
micro avg 0.842133 0.842133 0.842133 4026.0  
weighted avg 0.842098 0.842137 0.842133 4026.0  
The result of Model Number:Dataset Number:Featuregroup Number:Rescale of 71 : 1 : 5 :  
1

f1-score precision recall support  
AFIB 0.659610 0.660718 0.675959 204.0  
GSVT 0.653409 0.678766 0.630722 300.0  
SB 0.693083 0.655073 0.736058 892.0  
SR 0.600755 0.656196 0.555473 681.0  
macro avg 0.651714 0.662688 0.649553 2077.0

micro avg 0.655731 0.655731 0.655731 2077.0  
weighted avg 0.653792 0.659418 0.655731 2077.0  
The result of Model Number:Dataset Number:Featuregroup Number:Rescale of 71 : 1 : 6 :  
0

|              | f1-score | precision | recall   | support |
|--------------|----------|-----------|----------|---------|
| AFIB         | 0.892312 | 0.894113  | 0.890536 | 204.0   |
| GSVT         | 0.917137 | 0.914410  | 0.919885 | 300.0   |
| SB           | 0.932333 | 0.931502  | 0.933169 | 892.0   |
| SR           | 0.924319 | 0.926095  | 0.922563 | 681.0   |
| macro avg    | 0.916525 | 0.916530  | 0.916538 | 2077.0  |
| micro avg    | 0.923585 | 0.923585  | 0.923585 | 2077.0  |
| weighted avg | 0.923580 | 0.923588  | 0.923585 | 2077.0  |

The result of Model Number:Dataset Number:Featuregroup Number:Rescale of 71 : 1 : 6 :  
1

|              | f1-score | precision | recall   | support |
|--------------|----------|-----------|----------|---------|
| AFIB         | 0.667105 | 0.670753  | 0.663518 | 875.0   |
| GSVT         | 0.663925 | 0.658327  | 0.669686 | 691.0   |
| SB           | 0.698284 | 0.691671  | 0.705027 | 1553.0  |
| SR           | 0.672296 | 0.684836  | 0.660215 | 907.0   |
| macro avg    | 0.675402 | 0.676397  | 0.674612 | 4026.0  |
| micro avg    | 0.679844 | 0.679844  | 0.679844 | 4026.0  |
| weighted avg | 0.679755 | 0.679862  | 0.679844 | 4026.0  |

The result of Model Number:Dataset Number:Featuregroup Number:Rescale of 71 : 1 : 7 :  
0

|              | f1-score | precision | recall   | support |
|--------------|----------|-----------|----------|---------|
| AFIB         | 0.737907 | 0.739386  | 0.736465 | 875.0   |
| GSVT         | 0.739734 | 0.735741  | 0.743791 | 691.0   |
| SB           | 0.773271 | 0.769140  | 0.777452 | 1553.0  |
| SR           | 0.754771 | 0.763722  | 0.746049 | 907.0   |
| macro avg    | 0.751421 | 0.751997  | 0.750939 | 4026.0  |
| micro avg    | 0.755692 | 0.755692  | 0.755692 | 4026.0  |
| weighted avg | 0.755661 | 0.755720  | 0.755692 | 4026.0  |

The result of Model Number:Dataset Number:Featuregroup Number:Rescale of 71 : 1 : 7 :  
1

|              | f1-score | precision | recall   | support |
|--------------|----------|-----------|----------|---------|
| AFIB         | 0.871013 | 0.875582  | 0.866544 | 875.0   |
| GSVT         | 0.889226 | 0.887629  | 0.890892 | 691.0   |
| SB           | 0.965547 | 0.958142  | 0.973069 | 1553.0  |
| SR           | 0.931482 | 0.940805  | 0.922347 | 907.0   |
| macro avg    | 0.914317 | 0.915540  | 0.913213 | 4026.0  |
| micro avg    | 0.924386 | 0.924386  | 0.924386 | 4026.0  |
| weighted avg | 0.924228 | 0.924191  | 0.924386 | 4026.0  |

The result of Model Number:Dataset Number:Featuregroup Number:Rescale of 71 : 1 : 8 :  
0

f1-score precision recall support  
AFIB 0.788955 0.802071 0.776441 204.0  
GSVT 0.804083 0.798371 0.809938 300.0  
SB 0.822734 0.818110 0.827429 892.0  
SR 0.812252 0.817221 0.807369 681.0  
macro avg 0.807006 0.808943 0.805294 2077.0  
micro avg 0.813317 0.813317 0.813317 2077.0  
weighted avg 0.813285 0.813392 0.813317 2077.0  
The result of Model Number:Dataset Number:Featuregroup Number:Rescale of 71 : 1 : 8 :  
1

f1-score precision recall support  
AFIB 0.823600 0.836651 0.811060 204.0  
GSVT 0.844770 0.837581 0.852088 300.0  
SB 0.859355 0.857440 0.861282 892.0  
SR 0.851213 0.853105 0.849345 681.0  
macro avg 0.844734 0.846194 0.843444 2077.0  
micro avg 0.851107 0.851107 0.851107 2077.0  
weighted avg 0.851067 0.851108 0.851107 2077.0  
The result of Model Number:Dataset Number:Featuregroup Number:Rescale of 71 : 1 : 9 :  
0

f1-score precision recall support  
AFIB 0.921172 0.923999 0.918508 204.0  
GSVT 0.945371 0.942968 0.947870 300.0  
SB 0.966489 0.965309 0.967679 892.0  
SR 0.958579 0.960422 0.956751 681.0  
macro avg 0.947903 0.948175 0.947702 2077.0  
micro avg 0.956405 0.956405 0.956405 2077.0  
weighted avg 0.956394 0.956422 0.956405 2077.0  
The result of Model Number:Dataset Number:Featuregroup Number:Rescale of 71 : 1 : 9 :  
1

f1-score precision recall support  
AFIB 0.661808 0.666266 0.657506 875.0  
GSVT 0.673619 0.664262 0.683366 691.0  
SB 0.717814 0.712899 0.722804 1553.0  
SR 0.688725 0.700622 0.677263 907.0  
macro avg 0.685491 0.686012 0.685235 4026.0  
micro avg 0.691584 0.691584 0.691584 4026.0  
weighted avg 0.691503 0.691650 0.691584 4026.0  
The result of Model Number:Dataset Number:Featuregroup Number:Rescale of 71 : 1 :  
10 : 0

f1-score precision recall support  
AFIB 0.712471 0.704516 0.720615 875.0  
GSVT 0.726646 0.733302 0.720121 691.0  
SB 0.775001 0.772478 0.777545 1553.0



SR 0.754910 0.762473 0.747499 907.0  
macro avg 0.742257 0.743192 0.741445 4026.0  
micro avg 0.748547 0.748547 0.748547 4026.0  
weighted avg 0.748586 0.748729 0.748547 4026.0  
The result of Model Number:Dataset Number:Featuregroup Number:Rescale of 71 : 1 : 10 : 1

f1-score precision recall support  
AFIB 0.852474 0.900969 0.809499 204.0  
GSVT 0.900873 0.890953 0.911062 300.0  
SB 0.914274 0.905176 0.923587 892.0  
SR 0.903653 0.906742 0.900727 681.0  
macro avg 0.892818 0.900960 0.886219 2077.0  
micro avg 0.903077 0.903077 0.903077 2077.0  
weighted avg 0.902786 0.903222 0.903077 2077.0

The result of Model Number:Dataset Number:Featuregroup Number:Rescale of 72 : 0 : 0 : 0

f1-score precision recall support  
AFIB 0.913331 0.923778 0.903472 204.0  
GSVT 0.934710 0.929179 0.940322 300.0  
SB 0.897304 0.864159 0.953252 892.0  
SR 0.752696 0.756339 0.749108 681.0  
macro avg 0.874510 0.868364 0.886539 2077.0  
micro avg 0.879561 0.879561 0.879561 2077.0  
weighted avg 0.856868 0.844054 0.879561 2077.0

The result of Model Number:Dataset Number:Featuregroup Number:Rescale of 72 : 0 : 0 : 1

f1-score precision recall support  
AFIB 0.904588 0.915695 0.893888 204.0  
GSVT 0.922808 0.918866 0.926805 300.0  
SB 0.933978 0.931175 0.936803 892.0  
SR 0.926117 0.928321 0.923953 681.0  
macro avg 0.921873 0.923514 0.920362 2077.0  
micro avg 0.926931 0.926931 0.926931 2077.0  
weighted avg 0.926901 0.926941 0.926931 2077.0

The result of Model Number:Dataset Number:Featuregroup Number:Rescale of 72 : 0 : 1 : 0

f1-score precision recall support  
AFIB 0.683277 0.689932 0.676914 204.0  
GSVT 0.699077 0.695867 0.702341 300.0  
SB 0.708738 0.706299 0.711198 892.0  
SR 0.702752 0.705479 0.700080 681.0  
macro avg 0.698461 0.699394 0.697633 2077.0  
micro avg 0.702906 0.702906 0.702906 2077.0  
weighted avg 0.702879 0.702916 0.702906 2077.0

The result of Model Number:Dataset Number:Featuregroup Number:Rescale of 72 : 0 : 1 : 1

|              | f1-score | precision | recall   | support |
|--------------|----------|-----------|----------|---------|
| AFIB         | 0.890089 | 0.891293  | 0.889058 | 875.0   |
| GSVT         | 0.903952 | 0.903487  | 0.904451 | 691.0   |
| SB           | 0.944085 | 0.940706  | 0.947490 | 1553.0  |
| SR           | 0.921477 | 0.926642  | 0.916428 | 907.0   |
| macro avg    | 0.914901 | 0.915532  | 0.914357 | 4026.0  |
| micro avg    | 0.920406 | 0.920406  | 0.920406 | 4026.0  |
| weighted avg | 0.920368 | 0.920410  | 0.920406 | 4026.0  |

The result of Model Number:Dataset Number:Featuregroup Number:Rescale of 72 : 0 : 2 : 0

|              | f1-score | precision | recall   | support |
|--------------|----------|-----------|----------|---------|
| AFIB         | 0.693731 | 0.688924  | 0.698744 | 875.0   |
| GSVT         | 0.704433 | 0.707292  | 0.701711 | 691.0   |
| SB           | 0.764311 | 0.756364  | 0.772431 | 1553.0  |
| SR           | 0.725720 | 0.742607  | 0.709651 | 907.0   |
| macro avg    | 0.722049 | 0.723797  | 0.720634 | 4026.0  |
| micro avg    | 0.730135 | 0.730135  | 0.730135 | 4026.0  |
| weighted avg | 0.730000 | 0.730185  | 0.730135 | 4026.0  |

The result of Model Number:Dataset Number:Featuregroup Number:Rescale of 72 : 0 : 2 : 1

|              | f1-score | precision | recall   | support |
|--------------|----------|-----------|----------|---------|
| AFIB         | 0.645160 | 0.628212  | 0.685549 | 875.0   |
| GSVT         | 0.620638 | 0.587441  | 0.707514 | 691.0   |
| SB           | 0.588087 | 0.584370  | 0.591868 | 1553.0  |
| SR           | 0.571233 | 0.581075  | 0.561878 | 907.0   |
| macro avg    | 0.606279 | 0.595275  | 0.636702 | 4026.0  |
| micro avg    | 0.625321 | 0.625321  | 0.625321 | 4026.0  |
| weighted avg | 0.602281 | 0.593683  | 0.625321 | 4026.0  |

The result of Model Number:Dataset Number:Featuregroup Number:Rescale of 72 : 0 : 3 : 0

|              | f1-score | precision | recall   | support |
|--------------|----------|-----------|----------|---------|
| AFIB         | 0.842349 | 0.846972  | 0.837830 | 875.0   |
| GSVT         | 0.843527 | 0.832863  | 0.854600 | 691.0   |
| SB           | 0.887115 | 0.883555  | 0.890711 | 1553.0  |
| SR           | 0.868071 | 0.878609  | 0.857837 | 907.0   |
| macro avg    | 0.860266 | 0.860500  | 0.860245 | 4026.0  |
| micro avg    | 0.865614 | 0.865614  | 0.865614 | 4026.0  |
| weighted avg | 0.865614 | 0.865789  | 0.865614 | 4026.0  |

The result of Model Number:Dataset Number:Featuregroup Number:Rescale of 72 : 0 : 3 : 1

|      | f1-score | precision | recall   | support |
|------|----------|-----------|----------|---------|
| AFIB | 0.675945 | 0.669608  | 0.682489 | 875.0   |

GSVT 0.640860 0.625457 0.687971 691.0  
SB 0.741036 0.738314 0.743797 1553.0  
SR 0.576364 0.580406 0.572386 907.0  
macro avg 0.658551 0.653446 0.671661 4026.0  
micro avg 0.682274 0.682274 0.682274 4026.0  
weighted avg 0.672597 0.668437 0.682274 4026.0  
The result of Model Number:Dataset Number:Featuregroup Number:Rescale of 72 : 0 : 4 :  
0

f1-score precision recall support

AFIB 0.859187 0.854861 0.863595 875.0  
GSVT 0.875922 0.880163 0.871736 691.0  
SB 0.932910 0.930764 0.935071 1553.0  
SR 0.909556 0.914422 0.904751 907.0  
macro avg 0.894394 0.895052 0.893788 4026.0  
micro avg 0.901836 0.901836 0.901836 4026.0  
weighted avg 0.901845 0.901901 0.901836 4026.0  
The result of Model Number:Dataset Number:Featuregroup Number:Rescale of 72 : 0 : 4 :  
1

f1-score precision recall support

AFIB 0.882433 0.900447 0.865516 204.0  
GSVT 0.914476 0.906531 0.922728 300.0  
SB 0.932058 0.930394 0.933730 892.0  
SR 0.923382 0.923933 0.922838 681.0  
macro avg 0.913087 0.915326 0.911203 2077.0  
micro avg 0.921870 0.921870 0.921870 2077.0  
weighted avg 0.921800 0.921887 0.921870 2077.0  
The result of Model Number:Dataset Number:Featuregroup Number:Rescale of 72 : 0 : 5 :  
0

f1-score precision recall support

AFIB 0.804550 0.795016 0.814383 875.0  
GSVT 0.816001 0.823889 0.808342 691.0  
SB 0.866049 0.862736 0.869395 1553.0  
SR 0.845858 0.855617 0.836344 907.0  
macro avg 0.833115 0.834315 0.832116 4026.0  
micro avg 0.839514 0.839514 0.839514 4026.0  
weighted avg 0.839544 0.839747 0.839514 4026.0  
The result of Model Number:Dataset Number:Featuregroup Number:Rescale of 72 : 0 : 5 :  
1

f1-score precision recall support

AFIB 0.782848 0.792562 0.773632 204.0  
GSVT 0.796885 0.791440 0.802489 300.0  
SB 0.815756 0.814482 0.817035 892.0  
SR 0.809896 0.811210 0.808594 681.0  
macro avg 0.801346 0.802423 0.800437 2077.0

micro avg 0.807903 0.807903 0.807903 2077.0  
weighted avg 0.807877 0.807928 0.807903 2077.0  
The result of Model Number:Dataset Number:Featuregroup Number:Rescale of 72 : 0 : 6 :  
0

|              | f1-score | precision | recall   | support |
|--------------|----------|-----------|----------|---------|
| AFIB         | 0.705505 | 0.711030  | 0.700102 | 875.0   |
| GSVT         | 0.707366 | 0.698338  | 0.716674 | 691.0   |
| SB           | 0.741947 | 0.738971  | 0.744954 | 1553.0  |
| SR           | 0.726272 | 0.733401  | 0.719306 | 907.0   |
| macro avg    | 0.720272 | 0.720435  | 0.720259 | 4026.0  |
| micro avg    | 0.724574 | 0.724574  | 0.724574 | 4026.0  |
| weighted avg | 0.724560 | 0.724669  | 0.724574 | 4026.0  |

The result of Model Number:Dataset Number:Featuregroup Number:Rescale of 72 : 0 : 6 :  
1

|              | f1-score | precision | recall   | support |
|--------------|----------|-----------|----------|---------|
| AFIB         | 0.700475 | 0.707323  | 0.693923 | 875.0   |
| GSVT         | 0.695125 | 0.689851  | 0.700709 | 691.0   |
| SB           | 0.735521 | 0.727953  | 0.743313 | 1553.0  |
| SR           | 0.712174 | 0.723628  | 0.701279 | 907.0   |
| macro avg    | 0.710824 | 0.712189  | 0.709806 | 4026.0  |
| micro avg    | 0.715797 | 0.715797  | 0.715797 | 4026.0  |
| weighted avg | 0.715711 | 0.715955  | 0.715797 | 4026.0  |

The result of Model Number:Dataset Number:Featuregroup Number:Rescale of 72 : 0 : 7 :  
0

|              | f1-score | precision | recall   | support |
|--------------|----------|-----------|----------|---------|
| AFIB         | 0.658734 | 0.661424  | 0.656086 | 875.0   |
| GSVT         | 0.613408 | 0.640481  | 0.588633 | 691.0   |
| SB           | 0.658764 | 0.596755  | 0.735164 | 1553.0  |
| SR           | 0.496929 | 0.618475  | 0.415477 | 907.0   |
| macro avg    | 0.606959 | 0.629284  | 0.598840 | 4026.0  |
| micro avg    | 0.620807 | 0.620807  | 0.620807 | 4026.0  |
| weighted avg | 0.614514 | 0.623208  | 0.620807 | 4026.0  |

The result of Model Number:Dataset Number:Featuregroup Number:Rescale of 72 : 0 : 7 :  
1

|              | f1-score | precision | recall   | support |
|--------------|----------|-----------|----------|---------|
| AFIB         | 0.854040 | 0.874534  | 0.834873 | 204.0   |
| GSVT         | 0.884407 | 0.879281  | 0.889700 | 300.0   |
| SB           | 0.903296 | 0.899982  | 0.906636 | 892.0   |
| SR           | 0.895446 | 0.896110  | 0.894793 | 681.0   |
| macro avg    | 0.884297 | 0.887477  | 0.881501 | 2077.0  |
| micro avg    | 0.893258 | 0.893258  | 0.893258 | 2077.0  |
| weighted avg | 0.893156 | 0.893223  | 0.893258 | 2077.0  |

The result of Model Number:Dataset Number:Featuregroup Number:Rescale of 72 : 0 : 8 :  
0

f1-score precision recall support

|              |          |          |          |        |
|--------------|----------|----------|----------|--------|
| AFIB         | 0.764778 | 0.754536 | 0.775351 | 875.0  |
| GSVT         | 0.781877 | 0.787980 | 0.775882 | 691.0  |
| SB           | 0.830136 | 0.827539 | 0.832754 | 1553.0 |
| SR           | 0.810061 | 0.820800 | 0.799614 | 907.0  |
| macro avg    | 0.796713 | 0.797714 | 0.795900 | 4026.0 |
| micro avg    | 0.803051 | 0.803051 | 0.803051 | 4026.0 |
| weighted avg | 0.803126 | 0.803365 | 0.803051 | 4026.0 |

The result of Model Number:Dataset Number:Featuregroup Number:Rescale of 72 : 0 : 8 : 1

f1-score precision recall support

|              |          |          |          |        |
|--------------|----------|----------|----------|--------|
| AFIB         | 0.827483 | 0.854962 | 0.802028 | 204.0  |
| GSVT         | 0.858886 | 0.851995 | 0.866018 | 300.0  |
| SB           | 0.877862 | 0.874255 | 0.881502 | 892.0  |
| SR           | 0.869663 | 0.869536 | 0.869791 | 681.0  |
| macro avg    | 0.858473 | 0.862687 | 0.854835 | 2077.0 |
| micro avg    | 0.867620 | 0.867620 | 0.867620 | 2077.0 |
| weighted avg | 0.867485 | 0.867597 | 0.867620 | 2077.0 |

The result of Model Number:Dataset Number:Featuregroup Number:Rescale of 72 : 0 : 9 : 0

f1-score precision recall support

|              |          |          |          |        |
|--------------|----------|----------|----------|--------|
| AFIB         | 0.899958 | 0.916151 | 0.884593 | 204.0  |
| GSVT         | 0.920261 | 0.907322 | 0.933727 | 300.0  |
| SB           | 0.934420 | 0.923380 | 0.945733 | 892.0  |
| SR           | 0.915628 | 0.931929 | 0.899897 | 681.0  |
| macro avg    | 0.917567 | 0.919695 | 0.915987 | 2077.0 |
| micro avg    | 0.922965 | 0.922965 | 0.922965 | 2077.0 |
| weighted avg | 0.922829 | 0.923154 | 0.922965 | 2077.0 |

The result of Model Number:Dataset Number:Featuregroup Number:Rescale of 72 : 0 : 9 : 1

f1-score precision recall support

|              |          |          |          |        |
|--------------|----------|----------|----------|--------|
| AFIB         | 0.808022 | 0.806455 | 0.809699 | 875.0  |
| GSVT         | 0.823194 | 0.808791 | 0.838199 | 691.0  |
| SB           | 0.881874 | 0.869361 | 0.894761 | 1553.0 |
| SR           | 0.835367 | 0.872607 | 0.801212 | 907.0  |
| macro avg    | 0.837114 | 0.839304 | 0.835967 | 4026.0 |
| micro avg    | 0.845490 | 0.845490 | 0.845490 | 4026.0 |
| weighted avg | 0.845274 | 0.846025 | 0.845490 | 4026.0 |

The result of Model Number:Dataset Number:Featuregroup Number:Rescale of 72 : 0 : 10 : 0

f1-score precision recall support

|      |          |          |          |        |
|------|----------|----------|----------|--------|
| AFIB | 0.792213 | 0.782869 | 0.801815 | 875.0  |
| GSVT | 0.807780 | 0.814805 | 0.800882 | 691.0  |
| SB   | 0.860894 | 0.857599 | 0.864218 | 1553.0 |

SR 0.840582 0.850745 0.830668 907.0  
macro avg 0.825367 0.826504 0.824396 4026.0  
micro avg 0.832226 0.832226 0.832226 4026.0  
weighted avg 0.832275 0.832468 0.832226 4026.0  
The result of Model Number:Dataset Number:Featuregroup Number:Rescale of 72 : 0 :  
10 : 1

f1-score precision recall support  
AFIB 0.843791 0.833197 0.854903 875.0  
GSVT 0.782871 0.806574 0.763139 691.0  
SB 0.842885 0.780698 0.918066 1553.0  
SR 0.655370 0.802123 0.558848 907.0  
macro avg 0.781229 0.805648 0.773739 4026.0  
micro avg 0.796821 0.796821 0.796821 4026.0  
weighted avg 0.790537 0.801376 0.796821 4026.0  
The result of Model Number:Dataset Number:Featuregroup Number:Rescale of 72 : 1 : 0 :  
0

f1-score precision recall support  
AFIB 0.822180 0.830217 0.814489 875.0  
GSVT 0.815900 0.809709 0.822454 691.0  
SB 0.863314 0.854432 0.872460 1553.0  
SR 0.835912 0.849355 0.823123 907.0  
macro avg 0.834326 0.835928 0.833131 4026.0  
micro avg 0.840163 0.840163 0.840163 4026.0  
weighted avg 0.840063 0.840349 0.840163 4026.0  
The result of Model Number:Dataset Number:Featuregroup Number:Rescale of 72 : 1 : 0 :  
1

f1-score precision recall support  
AFIB 0.800752 0.793670 0.807995 875.0  
GSVT 0.728023 0.705035 0.809940 691.0  
SB 0.656352 0.630188 0.697267 1553.0  
SR 0.676466 0.683465 0.669652 907.0  
macro avg 0.715398 0.703090 0.746213 4026.0  
micro avg 0.734449 0.734449 0.734449 4026.0  
weighted avg 0.704568 0.690568 0.734449 4026.0  
The result of Model Number:Dataset Number:Featuregroup Number:Rescale of 72 : 1 : 1 :  
0

f1-score precision recall support  
AFIB 0.774919 0.756859 0.793988 875.0  
GSVT 0.743895 0.752072 0.735944 691.0  
SB 0.782831 0.732280 0.840896 1553.0  
SR 0.626534 0.752346 0.537106 907.0  
macro avg 0.732045 0.748389 0.726984 4026.0  
micro avg 0.744248 0.744248 0.744248 4026.0  
weighted avg 0.739217 0.745540 0.744248 4026.0

The result of Model Number:Dataset Number:Featuregroup Number:Rescale of 72 : 1 : 1 : 1

|              | f1-score | precision | recall   | support |
|--------------|----------|-----------|----------|---------|
| AFIB         | 0.810537 | 0.812792  | 0.808337 | 875.0   |
| GSVT         | 0.829104 | 0.828874  | 0.829343 | 691.0   |
| SB           | 0.883022 | 0.874723  | 0.891491 | 1553.0  |
| SR           | 0.859625 | 0.872021  | 0.847586 | 907.0   |
| macro avg    | 0.845572 | 0.847103  | 0.844189 | 4026.0  |
| micro avg    | 0.852860 | 0.852860  | 0.852860 | 4026.0  |
| weighted avg | 0.852743 | 0.852785  | 0.852860 | 4026.0  |

The result of Model Number:Dataset Number:Featuregroup Number:Rescale of 72 : 1 : 2 : 0

|              | f1-score | precision | recall   | support |
|--------------|----------|-----------|----------|---------|
| AFIB         | 0.746238 | 0.762630  | 0.730815 | 204.0   |
| GSVT         | 0.770288 | 0.764062  | 0.776721 | 300.0   |
| SB           | 0.786431 | 0.785464  | 0.787402 | 892.0   |
| SR           | 0.779792 | 0.779114  | 0.780477 | 681.0   |
| macro avg    | 0.770687 | 0.772818  | 0.768854 | 2077.0  |
| micro avg    | 0.778031 | 0.778031  | 0.778031 | 2077.0  |
| weighted avg | 0.777975 | 0.778048  | 0.778031 | 2077.0  |

The result of Model Number:Dataset Number:Featuregroup Number:Rescale of 72 : 1 : 2 : 1

|              | f1-score | precision | recall   | support |
|--------------|----------|-----------|----------|---------|
| AFIB         | 0.734191 | 0.731814  | 0.736606 | 875.0   |
| GSVT         | 0.742704 | 0.745012  | 0.740485 | 691.0   |
| SB           | 0.783674 | 0.781968  | 0.785390 | 1553.0  |
| SR           | 0.769222 | 0.772851  | 0.765656 | 907.0   |
| macro avg    | 0.757448 | 0.757911  | 0.757034 | 4026.0  |
| micro avg    | 0.762634 | 0.762634  | 0.762634 | 4026.0  |
| weighted avg | 0.762632 | 0.762671  | 0.762634 | 4026.0  |

The result of Model Number:Dataset Number:Featuregroup Number:Rescale of 72 : 1 : 3 : 0

|              | f1-score | precision | recall   | support |
|--------------|----------|-----------|----------|---------|
| AFIB         | 0.685762 | 0.680307  | 0.691371 | 875.0   |
| GSVT         | 0.658571 | 0.646050  | 0.671643 | 691.0   |
| SB           | 0.691195 | 0.638033  | 0.754032 | 1553.0  |
| SR           | 0.529263 | 0.676740  | 0.434660 | 907.0   |
| macro avg    | 0.641198 | 0.660282  | 0.637927 | 4026.0  |
| micro avg    | 0.654323 | 0.654323  | 0.654323 | 4026.0  |
| weighted avg | 0.647934 | 0.657317  | 0.654323 | 4026.0  |

The result of Model Number:Dataset Number:Featuregroup Number:Rescale of 72 : 1 : 3 : 1

|      | f1-score | precision | recall   | support |
|------|----------|-----------|----------|---------|
| AFIB | 0.798115 | 0.804365  | 0.792003 | 875.0   |

GSVT 0.800220 0.790007 0.810749 691.0  
SB 0.839340 0.835974 0.842742 1553.0  
SR 0.821607 0.829672 0.813728 907.0  
macro avg 0.814820 0.815004 0.814806 4026.0  
micro avg 0.819687 0.819687 0.819687 4026.0  
weighted avg 0.819671 0.819795 0.819687 4026.0  
The result of Model Number:Dataset Number:Featuregroup Number:Rescale of 72 : 1 : 4 :  
0

f1-score precision recall support  
AFIB 0.807393 0.805680 0.809150 875.0  
GSVT 0.820007 0.816076 0.824044 691.0  
SB 0.863054 0.852751 0.873611 1553.0  
SR 0.822946 0.846261 0.800898 907.0  
macro avg 0.828350 0.830192 0.826926 4026.0  
micro avg 0.834713 0.834713 0.834713 4026.0  
weighted avg 0.834532 0.834764 0.834713 4026.0  
The result of Model Number:Dataset Number:Featuregroup Number:Rescale of 72 : 1 : 4 :  
1

f1-score precision recall support  
AFIB 0.734516 0.725155 0.744147 875.0  
GSVT 0.701329 0.706155 0.696587 691.0  
SB 0.742582 0.699671 0.791117 1553.0  
SR 0.605601 0.700664 0.533286 907.0  
macro avg 0.696007 0.707911 0.691284 4026.0  
micro avg 0.706598 0.706598 0.706598 4026.0  
weighted avg 0.702889 0.706546 0.706598 4026.0  
The result of Model Number:Dataset Number:Featuregroup Number:Rescale of 72 : 1 : 5 :  
0

f1-score precision recall support  
AFIB 0.819098 0.795499 0.898708 875.0  
GSVT 0.902756 0.899873 0.905774 691.0  
SB 0.762059 0.750828 0.773693 1553.0  
SR 0.912475 0.930285 0.895448 907.0  
macro avg 0.849097 0.844121 0.868406 4026.0  
micro avg 0.850963 0.850963 0.850963 4026.0  
weighted avg 0.832491 0.826547 0.850963 4026.0  
The result of Model Number:Dataset Number:Featuregroup Number:Rescale of 72 : 1 : 5 :  
1

f1-score precision recall support  
AFIB 0.726564 0.810345 0.658580 204.0  
GSVT 0.856693 0.841782 0.872325 300.0  
SB 0.914684 0.910629 0.918784 892.0  
SR 0.893457 0.881241 0.906044 681.0  
macro avg 0.847850 0.860999 0.838933 2077.0



micro avg 0.882339 0.882339 0.882339 2077.0  
weighted avg 0.880871 0.881199 0.882339 2077.0  
The result of Model Number:Dataset Number:Featuregroup Number:Rescale of 72 : 1 : 6 :  
0

|              | f1-score | precision | recall   | support |
|--------------|----------|-----------|----------|---------|
| AFIB         | 0.699633 | 0.733129  | 0.669228 | 204.0   |
| GSVT         | 0.736902 | 0.729013  | 0.744990 | 300.0   |
| SB           | 0.752554 | 0.748397  | 0.756768 | 892.0   |
| SR           | 0.744053 | 0.743408  | 0.744712 | 681.0   |
| macro avg    | 0.733285 | 0.738487  | 0.728925 | 2077.0  |
| micro avg    | 0.742516 | 0.742516  | 0.742516 | 2077.0  |
| weighted avg | 0.742308 | 0.742462  | 0.742516 | 2077.0  |

The result of Model Number:Dataset Number:Featuregroup Number:Rescale of 72 : 1 : 6 :  
1

|              | f1-score | precision | recall   | support |
|--------------|----------|-----------|----------|---------|
| AFIB         | 0.646140 | 0.641165  | 0.651243 | 875.0   |
| GSVT         | 0.654529 | 0.657568  | 0.651661 | 691.0   |
| SB           | 0.701419 | 0.697688  | 0.705206 | 1553.0  |
| SR           | 0.680753 | 0.690324  | 0.671519 | 907.0   |
| macro avg    | 0.670711 | 0.671686  | 0.669907 | 4026.0  |
| micro avg    | 0.676698 | 0.676698  | 0.676698 | 4026.0  |
| weighted avg | 0.676701 | 0.676859  | 0.676698 | 4026.0  |

The result of Model Number:Dataset Number:Featuregroup Number:Rescale of 72 : 1 : 7 :  
0

|              | f1-score | precision | recall   | support |
|--------------|----------|-----------|----------|---------|
| AFIB         | 0.775811 | 0.767429  | 0.883131 | 204.0   |
| GSVT         | 0.928208 | 0.920976  | 0.935634 | 300.0   |
| SB           | 0.757506 | 0.755922  | 0.759098 | 892.0   |
| SR           | 0.939324 | 0.939061  | 0.939600 | 681.0   |
| macro avg    | 0.850212 | 0.845847  | 0.879366 | 2077.0  |
| micro avg    | 0.855961 | 0.855961  | 0.855961 | 2077.0  |
| weighted avg | 0.843574 | 0.840939  | 0.855961 | 2077.0  |

The result of Model Number:Dataset Number:Featuregroup Number:Rescale of 72 : 1 : 7 :  
1

|              | f1-score | precision | recall   | support |
|--------------|----------|-----------|----------|---------|
| AFIB         | 0.711911 | 0.713349  | 0.710495 | 204.0   |
| GSVT         | 0.731717 | 0.729542  | 0.733910 | 300.0   |
| SB           | 0.743842 | 0.743178  | 0.744508 | 892.0   |
| SR           | 0.737448 | 0.738864  | 0.736047 | 681.0   |
| macro avg    | 0.731229 | 0.731233  | 0.731240 | 2077.0  |
| micro avg    | 0.736862 | 0.736862  | 0.736862 | 2077.0  |
| weighted avg | 0.736858 | 0.736864  | 0.736862 | 2077.0  |

The result of Model Number:Dataset Number:Featuregroup Number:Rescale of 72 : 1 : 8 :  
0

f1-score precision recall support  
AFIB 0.761740 0.768517 0.755121 875.0  
GSVT 0.777728 0.769194 0.786504 691.0  
SB 0.836442 0.829930 0.843065 1553.0  
SR 0.808646 0.820108 0.797503 907.0  
macro avg 0.796139 0.796937 0.795548 4026.0  
micro avg 0.803979 0.803979 0.803979 4026.0  
weighted avg 0.803867 0.803945 0.803979 4026.0  
The result of Model Number:Dataset Number:Featuregroup Number:Rescale of 72 : 1 : 8 :  
1

f1-score precision recall support  
AFIB 0.694700 0.705981 0.683811 875.0  
GSVT 0.738834 0.741149 0.736577 691.0  
SB 0.803814 0.801044 0.806607 1553.0  
SR 0.760977 0.752502 0.769693 907.0  
macro avg 0.749581 0.750169 0.749172 4026.0  
micro avg 0.759583 0.759583 0.759583 4026.0  
weighted avg 0.759296 0.759167 0.759583 4026.0  
The result of Model Number:Dataset Number:Featuregroup Number:Rescale of 72 : 1 : 9 :  
0

f1-score precision recall support  
AFIB 0.814307 0.817632 0.811034 875.0  
GSVT 0.758276 0.791742 0.727650 691.0  
SB 0.814344 0.737690 0.908787 1553.0  
SR 0.614288 0.764539 0.513600 907.0  
macro avg 0.750304 0.777901 0.740268 4026.0  
micro avg 0.767422 0.767422 0.767422 4026.0  
weighted avg 0.759643 0.770390 0.767422 4026.0  
The result of Model Number:Dataset Number:Featuregroup Number:Rescale of 72 : 1 : 9 :  
1

f1-score precision recall support  
AFIB 0.786719 0.784445 0.789078 875.0  
GSVT 0.801300 0.800648 0.802008 691.0  
SB 0.851097 0.847572 0.854658 1553.0  
SR 0.825546 0.834615 0.816716 907.0  
macro avg 0.816165 0.816820 0.815615 4026.0  
micro avg 0.822821 0.822821 0.822821 4026.0  
weighted avg 0.822802 0.822879 0.822821 4026.0  
The result of Model Number:Dataset Number:Featuregroup Number:Rescale of 72 : 1 :  
10 : 0

f1-score precision recall support  
AFIB 0.634776 0.639053 0.630650 875.0  
GSVT 0.646105 0.637131 0.655454 691.0  
SB 0.688495 0.683781 0.693281 1553.0

SR 0.660594 0.672005 0.649601 907.0  
macro avg 0.657493 0.657992 0.657247 4026.0  
micro avg 0.663336 0.663336 0.663336 4026.0  
weighted avg 0.663259 0.663400 0.663336 4026.0  
The result of Model Number:Dataset Number:Featuregroup Number:Rescale of 72 : 1 :  
10 : 1

f1-score precision recall support  
AFIB 0.698861 0.718043 0.680729 204.0  
GSVT 0.714668 0.703688 0.726063 300.0  
SB 0.730370 0.723305 0.737575 892.0  
SR 0.711910 0.720806 0.703236 681.0  
macro avg 0.713952 0.716461 0.711901 2077.0  
micro avg 0.719070 0.719070 0.719070 2077.0  
weighted avg 0.718955 0.719135 0.719070 2077.0

The result of Model Number:Dataset Number:Featuregroup Number:Rescale of 73 : 0 : 0 :  
0

f1-score precision recall support  
AFIB 0.831257 0.843341 0.819891 204.0  
GSVT 0.849590 0.838096 0.861472 300.0  
SB 0.862376 0.853389 0.871561 892.0  
SR 0.845284 0.859272 0.831759 681.0  
macro avg 0.847127 0.848524 0.846171 2077.0  
micro avg 0.851979 0.851979 0.851979 2077.0  
weighted avg 0.851869 0.852122 0.851979 2077.0

The result of Model Number:Dataset Number:Featuregroup Number:Rescale of 73 : 0 : 0 :  
1

f1-score precision recall support  
AFIB 0.895032 0.920220 0.871370 204.0  
GSVT 0.918171 0.911726 0.924881 300.0  
SB 0.943421 0.939646 0.947228 892.0  
SR 0.930881 0.931463 0.930327 681.0  
macro avg 0.921876 0.925764 0.918451 2077.0  
micro avg 0.931008 0.931008 0.931008 2077.0  
weighted avg 0.930909 0.931022 0.931008 2077.0

The result of Model Number:Dataset Number:Featuregroup Number:Rescale of 73 : 0 : 1 :  
0

f1-score precision recall support  
AFIB 0.631933 0.646816 0.617775 875.0  
GSVT 0.666152 0.667834 0.664521 691.0  
SB 0.724452 0.721449 0.727483 1553.0  
SR 0.689320 0.678464 0.700562 907.0  
macro avg 0.677964 0.678641 0.677585 4026.0  
micro avg 0.686768 0.686768 0.686768 4026.0  
weighted avg 0.686423 0.686342 0.686768 4026.0

The result of Model Number:Dataset Number:Featuregroup Number:Rescale of 73 : 0 : 1 : 1

|              | f1-score | precision | recall   | support |
|--------------|----------|-----------|----------|---------|
| AFIB         | 0.887279 | 0.879161  | 0.895587 | 875.0   |
| GSVT         | 0.898648 | 0.906577  | 0.890991 | 691.0   |
| SB           | 0.955234 | 0.950198  | 0.960337 | 1553.0  |
| SR           | 0.933640 | 0.944891  | 0.922738 | 907.0   |
| macro avg    | 0.918700 | 0.920207  | 0.917413 | 4026.0  |
| micro avg    | 0.925892 | 0.925892  | 0.925892 | 4026.0  |
| weighted avg | 0.925888 | 0.926077  | 0.925892 | 4026.0  |

The result of Model Number:Dataset Number:Featuregroup Number:Rescale of 73 : 0 : 2 : 0

|              | f1-score | precision | recall   | support |
|--------------|----------|-----------|----------|---------|
| AFIB         | 0.706704 | 0.725805  | 0.688730 | 204.0   |
| GSVT         | 0.712529 | 0.702040  | 0.723434 | 300.0   |
| SB           | 0.726331 | 0.718604  | 0.734229 | 892.0   |
| SR           | 0.712860 | 0.722655  | 0.703338 | 681.0   |
| macro avg    | 0.714606 | 0.717276  | 0.712433 | 2077.0  |
| micro avg    | 0.718072 | 0.718072  | 0.718072 | 2077.0  |
| weighted avg | 0.717993 | 0.718247  | 0.718072 | 2077.0  |

The result of Model Number:Dataset Number:Featuregroup Number:Rescale of 73 : 0 : 2 : 1

|              | f1-score | precision | recall   | support |
|--------------|----------|-----------|----------|---------|
| AFIB         | 0.663451 | 0.666738  | 0.660266 | 875.0   |
| GSVT         | 0.670056 | 0.671022  | 0.669195 | 691.0   |
| SB           | 0.705325 | 0.702052  | 0.708636 | 1553.0  |
| SR           | 0.692341 | 0.694074  | 0.690654 | 907.0   |
| macro avg    | 0.682793 | 0.683472  | 0.682188 | 4026.0  |
| micro avg    | 0.687303 | 0.687303  | 0.687303 | 4026.0  |
| weighted avg | 0.687246 | 0.687254  | 0.687303 | 4026.0  |

The result of Model Number:Dataset Number:Featuregroup Number:Rescale of 73 : 0 : 3 : 0

|              | f1-score | precision | recall   | support |
|--------------|----------|-----------|----------|---------|
| AFIB         | 0.881221 | 0.897575  | 0.865671 | 204.0   |
| GSVT         | 0.900598 | 0.895876  | 0.905389 | 300.0   |
| SB           | 0.914976 | 0.911724  | 0.918257 | 892.0   |
| SR           | 0.905556 | 0.907188  | 0.903969 | 681.0   |
| macro avg    | 0.900588 | 0.903091  | 0.898322 | 2077.0  |
| micro avg    | 0.906549 | 0.906549  | 0.906549 | 2077.0  |
| weighted avg | 0.906496 | 0.906558  | 0.906549 | 2077.0  |

The result of Model Number:Dataset Number:Featuregroup Number:Rescale of 73 : 0 : 3 : 1

|      | f1-score | precision | recall   | support |
|------|----------|-----------|----------|---------|
| AFIB | 0.719721 | 0.711769  | 0.727867 | 875.0   |

GSVT 0.732689 0.737200 0.728245 691.0  
SB 0.779807 0.778509 0.781112 1553.0  
SR 0.760819 0.767933 0.753855 907.0  
macro avg 0.748259 0.748853 0.747770 4026.0  
micro avg 0.754326 0.754326 0.754326 4026.0  
weighted avg 0.754383 0.754531 0.754326 4026.0  
The result of Model Number:Dataset Number:Featuregroup Number:Rescale of 73 : 0 : 4 :  
0

f1-score precision recall support  
AFIB 0.799726 0.859844 0.748299 204.0  
GSVT 0.762675 0.786883 0.740027 300.0  
SB 0.794599 0.755279 0.838244 892.0  
SR 0.703399 0.733632 0.675630 681.0  
macro avg 0.765100 0.783910 0.750550 2077.0  
micro avg 0.761906 0.761906 0.761906 2077.0  
weighted avg 0.760589 0.763017 0.761906 2077.0  
The result of Model Number:Dataset Number:Featuregroup Number:Rescale of 73 : 0 : 4 :  
1

f1-score precision recall support  
AFIB 0.708819 0.724388 0.694169 204.0  
GSVT 0.731662 0.725748 0.737773 300.0  
SB 0.746996 0.746077 0.747918 892.0  
SR 0.740690 0.740046 0.741340 681.0  
macro avg 0.732042 0.734065 0.730300 2077.0  
micro avg 0.739017 0.739017 0.739017 2077.0  
weighted avg 0.738964 0.739033 0.739017 2077.0  
The result of Model Number:Dataset Number:Featuregroup Number:Rescale of 73 : 0 : 5 :  
0

f1-score precision recall support  
AFIB 0.879263 0.892180 0.866794 204.0  
GSVT 0.901540 0.893876 0.909356 300.0  
SB 0.917121 0.913452 0.920822 892.0  
SR 0.908051 0.912508 0.903648 681.0  
macro avg 0.901494 0.903004 0.900155 2077.0  
micro avg 0.908229 0.908229 0.908229 2077.0  
weighted avg 0.908179 0.908226 0.908229 2077.0  
The result of Model Number:Dataset Number:Featuregroup Number:Rescale of 73 : 0 : 5 :  
1

f1-score precision recall support  
AFIB 0.644781 0.653062 0.636739 875.0  
GSVT 0.651914 0.646642 0.657377 691.0  
SB 0.697361 0.695265 0.699472 1553.0  
SR 0.680093 0.679807 0.680388 907.0  
macro avg 0.668537 0.668694 0.668494 4026.0

micro avg 0.674314 0.674314 0.674314 4026.0  
weighted avg 0.674243 0.674265 0.674314 4026.0  
The result of Model Number:Dataset Number:Featuregroup Number:Rescale of 73 : 0 : 6 :  
0

|              | f1-score | precision | recall   | support |
|--------------|----------|-----------|----------|---------|
| AFIB         | 0.809740 | 0.809341  | 0.810201 | 875.0   |
| GSVT         | 0.827317 | 0.823247  | 0.831480 | 691.0   |
| SB           | 0.865389 | 0.859731  | 0.871127 | 1553.0  |
| SR           | 0.840754 | 0.854449  | 0.827513 | 907.0   |
| macro avg    | 0.835800 | 0.836692  | 0.835080 | 4026.0  |
| micro avg    | 0.841255 | 0.841255  | 0.841255 | 4026.0  |
| weighted avg | 0.841210 | 0.841328  | 0.841255 | 4026.0  |

The result of Model Number:Dataset Number:Featuregroup Number:Rescale of 73 : 0 : 6 :  
1

|              | f1-score | precision | recall   | support |
|--------------|----------|-----------|----------|---------|
| AFIB         | 0.641501 | 0.704390  | 0.589548 | 204.0   |
| GSVT         | 0.752650 | 0.742505  | 0.763196 | 300.0   |
| SB           | 0.799079 | 0.796413  | 0.801765 | 892.0   |
| SR           | 0.778312 | 0.767877  | 0.789054 | 681.0   |
| macro avg    | 0.742885 | 0.752796  | 0.735891 | 2077.0  |
| micro avg    | 0.771183 | 0.771183  | 0.771183 | 2077.0  |
| weighted avg | 0.770086 | 0.770232  | 0.771183 | 2077.0  |

The result of Model Number:Dataset Number:Featuregroup Number:Rescale of 73 : 0 : 7 :  
0

|              | f1-score | precision | recall   | support |
|--------------|----------|-----------|----------|---------|
| AFIB         | 0.905300 | 0.941840  | 0.871561 | 204.0   |
| GSVT         | 0.938989 | 0.923735  | 0.954916 | 300.0   |
| SB           | 0.963281 | 0.955536  | 0.971164 | 892.0   |
| SR           | 0.937365 | 0.944115  | 0.930760 | 681.0   |
| macro avg    | 0.936234 | 0.941307  | 0.932100 | 2077.0  |
| micro avg    | 0.945787 | 0.945787  | 0.945787 | 2077.0  |
| weighted avg | 0.945580 | 0.945853  | 0.945787 | 2077.0  |

The result of Model Number:Dataset Number:Featuregroup Number:Rescale of 73 : 0 : 7 :  
1

|              | f1-score | precision | recall   | support |
|--------------|----------|-----------|----------|---------|
| AFIB         | 0.688320 | 0.682232  | 0.694546 | 875.0   |
| GSVT         | 0.625802 | 0.606042  | 0.696217 | 691.0   |
| SB           | 0.564195 | 0.541705  | 0.599365 | 1553.0  |
| SR           | 0.581484 | 0.587501  | 0.575627 | 907.0   |
| macro avg    | 0.614950 | 0.604370  | 0.641439 | 4026.0  |
| micro avg    | 0.631327 | 0.631327  | 0.631327 | 4026.0  |
| weighted avg | 0.605641 | 0.593606  | 0.631327 | 4026.0  |

The result of Model Number:Dataset Number:Featuregroup Number:Rescale of 73 : 0 : 8 :  
0

f1-score precision recall support  
AFIB 0.750834 0.789625 0.715900 204.0  
GSVT 0.787314 0.779618 0.795180 300.0  
SB 0.801196 0.794750 0.807751 892.0  
SR 0.791300 0.792263 0.790371 681.0  
macro avg 0.782661 0.789064 0.777301 2077.0  
micro avg 0.791215 0.791215 0.791215 2077.0  
weighted avg 0.791000 0.791246 0.791215 2077.0  
The result of Model Number:Dataset Number:Featuregroup Number:Rescale of 73 : 0 : 8 :  
1

f1-score precision recall support  
AFIB 0.738087 0.799702 0.686758 204.0  
GSVT 0.791684 0.781729 0.802218 300.0  
SB 0.811894 0.800520 0.823691 892.0  
SR 0.789747 0.793447 0.786467 681.0  
macro avg 0.782853 0.793850 0.774784 2077.0  
micro avg 0.794935 0.794935 0.794935 2077.0  
weighted avg 0.794464 0.795407 0.794935 2077.0  
The result of Model Number:Dataset Number:Featuregroup Number:Rescale of 73 : 0 : 9 :  
0

f1-score precision recall support  
AFIB 0.828515 0.884674 0.779612 204.0  
GSVT 0.780657 0.803820 0.759086 300.0  
SB 0.815982 0.776811 0.859778 892.0  
SR 0.724034 0.756905 0.694687 681.0  
macro avg 0.787297 0.805552 0.773291 2077.0  
micro avg 0.783231 0.783231 0.783231 2077.0  
weighted avg 0.781963 0.784780 0.783231 2077.0  
The result of Model Number:Dataset Number:Featuregroup Number:Rescale of 73 : 0 : 9 :  
1

f1-score precision recall support  
AFIB 0.647636 0.639997 0.655485 875.0  
GSVT 0.660362 0.666105 0.654723 691.0  
SB 0.703783 0.701089 0.706500 1553.0  
SR 0.687177 0.695486 0.679073 907.0  
macro avg 0.674739 0.675669 0.673945 4026.0  
micro avg 0.680347 0.680347 0.680347 4026.0  
weighted avg 0.680386 0.680545 0.680347 4026.0  
The result of Model Number:Dataset Number:Featuregroup Number:Rescale of 73 : 0 :  
10 : 0

f1-score precision recall support  
AFIB 0.661427 0.657102 0.665867 875.0  
GSVT 0.681086 0.686881 0.675479 691.0  
SB 0.725108 0.723529 0.726696 1553.0

SR 0.707437 0.710277 0.704629 907.0  
macro avg 0.693764 0.694447 0.693168 4026.0  
micro avg 0.699713 0.699713 0.699713 4026.0  
weighted avg 0.699731 0.699816 0.699713 4026.0  
The result of Model Number:Dataset Number:Featuregroup Number:Rescale of 73 : 0 :  
10 : 1

f1-score precision recall support  
AFIB 0.715577 0.729363 0.702641 204.0  
GSVT 0.729015 0.717169 0.741390 300.0  
SB 0.741186 0.732346 0.750243 892.0  
SR 0.727398 0.741035 0.714265 681.0  
macro avg 0.728294 0.729979 0.727135 2077.0  
micro avg 0.732493 0.732493 0.732493 2077.0  
weighted avg 0.732392 0.732710 0.732493 2077.0  
The result of Model Number:Dataset Number:Featuregroup Number:Rescale of 73 : 1 : 0 :  
0

f1-score precision recall support  
AFIB 0.697989 0.699760 0.696251 875.0  
GSVT 0.710306 0.702612 0.718200 691.0  
SB 0.748624 0.740155 0.757299 1553.0  
SR 0.714395 0.733953 0.695881 907.0  
macro avg 0.717828 0.719120 0.716908 4026.0  
micro avg 0.723484 0.723484 0.723484 4026.0  
weighted avg 0.723331 0.723535 0.723484 4026.0  
The result of Model Number:Dataset Number:Featuregroup Number:Rescale of 73 : 1 : 0 :  
1

f1-score precision recall support  
AFIB 0.914063 0.937603 0.891712 204.0  
GSVT 0.838812 0.801473 0.946599 300.0  
SB 0.962360 0.960108 0.964624 892.0  
SR 0.763458 0.763601 0.763324 681.0  
macro avg 0.869673 0.865696 0.891565 2077.0  
micro avg 0.888858 0.888858 0.888858 2077.0  
weighted avg 0.874556 0.870555 0.888858 2077.0  
The result of Model Number:Dataset Number:Featuregroup Number:Rescale of 73 : 1 : 1 :  
0

f1-score precision recall support  
AFIB 0.705533 0.699225 0.711987 875.0  
GSVT 0.716861 0.719697 0.714073 691.0  
SB 0.764327 0.762908 0.765754 1553.0  
SR 0.744959 0.751845 0.738225 907.0  
macro avg 0.732920 0.733419 0.732510 4026.0  
micro avg 0.738996 0.738996 0.738996 4026.0  
weighted avg 0.739039 0.739159 0.738996 4026.0



The result of Model Number:Dataset Number:Featuregroup Number:Rescale of 73 : 1 : 1 : 1

|              | f1-score | precision | recall   | support |
|--------------|----------|-----------|----------|---------|
| AFIB         | 0.801185 | 0.811126  | 0.791753 | 204.0   |
| GSVT         | 0.815551 | 0.809978  | 0.821286 | 300.0   |
| SB           | 0.834864 | 0.833560  | 0.836173 | 892.0   |
| SR           | 0.828867 | 0.830211  | 0.827534 | 681.0   |
| macro avg    | 0.820116 | 0.821219  | 0.819187 | 2077.0  |
| micro avg    | 0.826827 | 0.826827  | 0.826827 | 2077.0  |
| weighted avg | 0.826800 | 0.826852  | 0.826827 | 2077.0  |

The result of Model Number:Dataset Number:Featuregroup Number:Rescale of 73 : 1 : 2 : 0

|              | f1-score | precision | recall   | support |
|--------------|----------|-----------|----------|---------|
| AFIB         | 0.689693 | 0.703058  | 0.677137 | 204.0   |
| GSVT         | 0.716438 | 0.710448  | 0.722662 | 300.0   |
| SB           | 0.729806 | 0.728342  | 0.731279 | 892.0   |
| SR           | 0.722847 | 0.723596  | 0.722103 | 681.0   |
| macro avg    | 0.714696 | 0.716361  | 0.713295 | 2077.0  |
| micro avg    | 0.721708 | 0.721708  | 0.721708 | 2077.0  |
| weighted avg | 0.721654 | 0.721718  | 0.721708 | 2077.0  |

The result of Model Number:Dataset Number:Featuregroup Number:Rescale of 73 : 1 : 2 : 1

|              | f1-score | precision | recall   | support |
|--------------|----------|-----------|----------|---------|
| AFIB         | 0.900075 | 0.929965  | 0.872388 | 204.0   |
| GSVT         | 0.934233 | 0.926738  | 0.941991 | 300.0   |
| SB           | 0.954874 | 0.950951  | 0.958833 | 892.0   |
| SR           | 0.945956 | 0.945817  | 0.946095 | 681.0   |
| macro avg    | 0.933785 | 0.938368  | 0.929827 | 2077.0  |
| micro avg    | 0.943733 | 0.943733  | 0.943733 | 2077.0  |
| weighted avg | 0.943586 | 0.943709  | 0.943733 | 2077.0  |

The result of Model Number:Dataset Number:Featuregroup Number:Rescale of 73 : 1 : 3 : 0

|              | f1-score | precision | recall   | support |
|--------------|----------|-----------|----------|---------|
| AFIB         | 0.839529 | 0.873414  | 0.808242 | 204.0   |
| GSVT         | 0.870771 | 0.856625  | 0.885541 | 300.0   |
| SB           | 0.893298 | 0.886116  | 0.900608 | 892.0   |
| SR           | 0.869265 | 0.875524  | 0.863140 | 681.0   |
| macro avg    | 0.868215 | 0.872920  | 0.864383 | 2077.0  |
| micro avg    | 0.877075 | 0.877075  | 0.877075 | 2077.0  |
| weighted avg | 0.876883 | 0.877136  | 0.877075 | 2077.0  |

The result of Model Number:Dataset Number:Featuregroup Number:Rescale of 73 : 1 : 3 : 1

|      | f1-score | precision | recall   | support |
|------|----------|-----------|----------|---------|
| AFIB | 0.830411 | 0.833268  | 0.827678 | 875.0   |

GSVT 0.846176 0.829294 0.863913 691.0  
SB 0.895745 0.890901 0.900647 1553.0  
SR 0.861100 0.881121 0.842019 907.0  
macro avg 0.858358 0.858646 0.858564 4026.0  
micro avg 0.865275 0.865275 0.865275 4026.0  
weighted avg 0.865233 0.865598 0.865275 4026.0  
The result of Model Number:Dataset Number:Featuregroup Number:Rescale of 73 : 1 : 4 :  
0

f1-score precision recall support  
AFIB 0.714950 0.728089 0.702365 204.0  
GSVT 0.726959 0.722199 0.731803 300.0  
SB 0.739394 0.735784 0.743041 892.0  
SR 0.731752 0.734794 0.728745 681.0  
macro avg 0.728264 0.730216 0.726488 2077.0  
micro avg 0.732735 0.732735 0.732735 2077.0  
weighted avg 0.732692 0.732741 0.732735 2077.0  
The result of Model Number:Dataset Number:Featuregroup Number:Rescale of 73 : 1 : 4 :  
1

f1-score precision recall support  
AFIB 0.665043 0.649544 0.681408 875.0  
GSVT 0.638418 0.645436 0.631594 691.0  
SB 0.671833 0.628450 0.721665 1553.0  
SR 0.537697 0.645671 0.460950 907.0  
macro avg 0.628248 0.642275 0.623904 4026.0  
micro avg 0.638721 0.638721 0.638721 4026.0  
weighted avg 0.634403 0.639829 0.638721 4026.0  
The result of Model Number:Dataset Number:Featuregroup Number:Rescale of 73 : 1 : 5 :  
0

f1-score precision recall support  
AFIB 0.686979 0.709793 0.665847 204.0  
GSVT 0.713050 0.707329 0.718971 300.0  
SB 0.728804 0.725810 0.731826 892.0  
SR 0.721997 0.721891 0.722104 681.0  
macro avg 0.712708 0.716206 0.709687 2077.0  
micro avg 0.720301 0.720301 0.720301 2077.0  
weighted avg 0.720189 0.720282 0.720301 2077.0  
The result of Model Number:Dataset Number:Featuregroup Number:Rescale of 73 : 1 : 5 :  
1

f1-score precision recall support  
AFIB 0.851453 0.874823 0.829362 204.0  
GSVT 0.870711 0.857334 0.884594 300.0  
SB 0.889841 0.881234 0.898620 892.0  
SR 0.867351 0.878189 0.856783 681.0  
macro avg 0.869839 0.872895 0.867340 2077.0

micro avg 0.876074 0.876074 0.876074 2077.0  
weighted avg 0.875934 0.876154 0.876074 2077.0  
The result of Model Number:Dataset Number:Featuregroup Number:Rescale of 73 : 1 : 6 :  
0

|              | f1-score | precision | recall   | support |
|--------------|----------|-----------|----------|---------|
| AFIB         | 0.748458 | 0.745539  | 0.751453 | 875.0   |
| GSVT         | 0.762465 | 0.764073  | 0.760909 | 691.0   |
| SB           | 0.809383 | 0.807365  | 0.811415 | 1553.0  |
| SR           | 0.790712 | 0.796023  | 0.785488 | 907.0   |
| macro avg    | 0.777754 | 0.778250  | 0.777316 | 4026.0  |
| micro avg    | 0.783873 | 0.783873  | 0.783873 | 4026.0  |
| weighted avg | 0.783883 | 0.783942  | 0.783873 | 4026.0  |

The result of Model Number:Dataset Number:Featuregroup Number:Rescale of 73 : 1 : 6 :  
1

|              | f1-score | precision | recall   | support |
|--------------|----------|-----------|----------|---------|
| AFIB         | 0.819886 | 0.826724  | 0.813442 | 204.0   |
| GSVT         | 0.841545 | 0.837669  | 0.845473 | 300.0   |
| SB           | 0.854236 | 0.851201  | 0.857297 | 892.0   |
| SR           | 0.846346 | 0.850136  | 0.842633 | 681.0   |
| macro avg    | 0.840503 | 0.841433  | 0.839711 | 2077.0  |
| micro avg    | 0.846474 | 0.846474  | 0.846474 | 2077.0  |
| weighted avg | 0.846442 | 0.846493  | 0.846474 | 2077.0  |

The result of Model Number:Dataset Number:Featuregroup Number:Rescale of 73 : 1 : 7 :  
0

|              | f1-score | precision | recall   | support |
|--------------|----------|-----------|----------|---------|
| AFIB         | 0.770272 | 0.768779  | 0.771871 | 875.0   |
| GSVT         | 0.784736 | 0.771006  | 0.799039 | 691.0   |
| SB           | 0.840674 | 0.828746  | 0.852959 | 1553.0  |
| SR           | 0.796340 | 0.831840  | 0.763780 | 907.0   |
| macro avg    | 0.798005 | 0.800093  | 0.796912 | 4026.0  |
| micro avg    | 0.805990 | 0.805990  | 0.805990 | 4026.0  |
| weighted avg | 0.805784 | 0.806500  | 0.805990 | 4026.0  |

The result of Model Number:Dataset Number:Featuregroup Number:Rescale of 73 : 1 : 7 :  
1

|              | f1-score | precision | recall   | support |
|--------------|----------|-----------|----------|---------|
| AFIB         | 0.852728 | 0.854255  | 0.851233 | 875.0   |
| GSVT         | 0.816544 | 0.820833  | 0.812322 | 691.0   |
| SB           | 0.863706 | 0.816194  | 0.917099 | 1553.0  |
| SR           | 0.717311 | 0.807387  | 0.645381 | 907.0   |
| macro avg    | 0.812572 | 0.824667  | 0.806509 | 4026.0  |
| micro avg    | 0.823586 | 0.823586  | 0.823586 | 4026.0  |
| weighted avg | 0.820245 | 0.823278  | 0.823586 | 4026.0  |

The result of Model Number:Dataset Number:Featuregroup Number:Rescale of 73 : 1 : 8 :  
0

f1-score precision recall support  
AFIB 0.656682 0.651732 0.745325 204.0  
GSVT 0.796097 0.791384 0.800875 300.0  
SB 0.651097 0.649738 0.652465 892.0  
SR 0.805254 0.803965 0.806557 681.0  
macro avg 0.727283 0.724205 0.751306 2077.0  
micro avg 0.733545 0.733545 0.733545 2077.0  
weighted avg 0.723134 0.720960 0.733545 2077.0  
The result of Model Number:Dataset Number:Featuregroup Number:Rescale of 73 : 1 : 8 :  
1

f1-score precision recall support  
AFIB 0.844021 0.846739 0.841398 875.0  
GSVT 0.855887 0.842298 0.869998 691.0  
SB 0.901816 0.894286 0.909480 1553.0  
SR 0.856484 0.878237 0.835814 907.0  
macro avg 0.864552 0.865390 0.864172 4026.0  
micro avg 0.871311 0.871311 0.871311 4026.0  
weighted avg 0.871159 0.871414 0.871311 4026.0  
The result of Model Number:Dataset Number:Featuregroup Number:Rescale of 73 : 1 : 9 :  
0

f1-score precision recall support  
AFIB 0.771009 0.768872 0.773215 875.0  
GSVT 0.777110 0.780817 0.773516 691.0  
SB 0.813498 0.810898 0.816117 1553.0  
SR 0.800492 0.804359 0.796700 907.0  
macro avg 0.790527 0.791236 0.789887 4026.0  
micro avg 0.795107 0.795107 0.795107 4026.0  
weighted avg 0.795088 0.795128 0.795107 4026.0  
The result of Model Number:Dataset Number:Featuregroup Number:Rescale of 73 : 1 : 9 :  
1

f1-score precision recall support  
AFIB 0.793247 0.801690 0.785419 204.0  
GSVT 0.816559 0.811118 0.822312 300.0  
SB 0.833815 0.833069 0.834562 892.0  
SR 0.826784 0.827887 0.825689 681.0  
macro avg 0.817601 0.818441 0.816996 2077.0  
micro avg 0.825057 0.825057 0.825057 2077.0  
weighted avg 0.825032 0.825118 0.825057 2077.0  
The result of Model Number:Dataset Number:Featuregroup Number:Rescale of 73 : 1 :  
10 : 0

f1-score precision recall support  
AFIB 0.674610 0.678154 0.671143 875.0  
GSVT 0.685995 0.687268 0.684813 691.0  
SB 0.726562 0.721403 0.731800 1553.0

SR 0.712632 0.717023 0.708311 907.0  
macro avg 0.699950 0.700962 0.699017 4026.0  
micro avg 0.705261 0.705261 0.705261 4026.0  
weighted avg 0.705170 0.705158 0.705261 4026.0  
The result of Model Number:Dataset Number:Featuregroup Number:Rescale of 73 : 1 :  
10 : 1

f1-score precision recall support  
AFIB 0.821162 0.822086 0.820390 204.0  
GSVT 0.840015 0.838140 0.841963 300.0  
SB 0.857820 0.856675 0.858973 892.0  
SR 0.851395 0.853540 0.849273 681.0  
macro avg 0.842598 0.842610 0.842650 2077.0  
micro avg 0.849546 0.849546 0.849546 2077.0  
weighted avg 0.849541 0.849572 0.849546 2077.0

The result of Model Number:Dataset Number:Featuregroup Number:Rescale of 74 : 0 : 0 :  
0

f1-score precision recall support  
AFIB 0.634351 0.634653 0.634140 875.0  
GSVT 0.650779 0.645146 0.656534 691.0  
SB 0.695035 0.689970 0.700181 1553.0  
SR 0.665342 0.678568 0.652656 907.0  
macro avg 0.661377 0.662084 0.660878 4026.0  
micro avg 0.667630 0.667630 0.667630 4026.0  
weighted avg 0.667561 0.667686 0.667630 4026.0

The result of Model Number:Dataset Number:Featuregroup Number:Rescale of 74 : 0 : 0 :  
1

f1-score precision recall support  
AFIB 0.628321 0.623968 0.632861 875.0  
GSVT 0.638014 0.640603 0.635549 691.0  
SB 0.692247 0.685048 0.699601 1553.0  
SR 0.657294 0.672589 0.642740 907.0  
macro avg 0.653969 0.655552 0.652688 4026.0  
micro avg 0.661293 0.661293 0.661293 4026.0  
weighted avg 0.661171 0.661338 0.661293 4026.0

The result of Model Number:Dataset Number:Featuregroup Number:Rescale of 74 : 0 : 1 :  
0

f1-score precision recall support  
AFIB 0.680854 0.689303 0.672839 204.0  
GSVT 0.693063 0.688327 0.697936 300.0  
SB 0.709475 0.708367 0.710587 892.0  
SR 0.704378 0.705521 0.703246 681.0  
macro avg 0.696943 0.697879 0.696152 2077.0  
micro avg 0.702646 0.702646 0.702646 2077.0  
weighted avg 0.702622 0.702667 0.702646 2077.0

The result of Model Number:Dataset Number:Featuregroup Number:Rescale of 74 : 0 : 1 :  
1

|              | f1-score | precision | recall   | support |
|--------------|----------|-----------|----------|---------|
| AFIB         | 0.743308 | 0.767450  | 0.720784 | 204.0   |
| GSVT         | 0.763829 | 0.754090  | 0.773977 | 300.0   |
| SB           | 0.785379 | 0.782417  | 0.788372 | 892.0   |
| SR           | 0.774394 | 0.775797  | 0.773027 | 681.0   |
| macro avg    | 0.766728 | 0.769939  | 0.764040 | 2077.0  |
| micro avg    | 0.774623 | 0.774623  | 0.774623 | 2077.0  |
| weighted avg | 0.774533 | 0.774685  | 0.774623 | 2077.0  |

The result of Model Number:Dataset Number:Featuregroup Number:Rescale of 74 : 0 : 2 :  
0

|              | f1-score | precision | recall   | support |
|--------------|----------|-----------|----------|---------|
| AFIB         | 0.806722 | 0.815321  | 0.798434 | 204.0   |
| GSVT         | 0.821558 | 0.817051  | 0.826206 | 300.0   |
| SB           | 0.840522 | 0.839121  | 0.841933 | 892.0   |
| SR           | 0.833516 | 0.834873  | 0.832173 | 681.0   |
| macro avg    | 0.825579 | 0.826592  | 0.824687 | 2077.0  |
| micro avg    | 0.832189 | 0.832189  | 0.832189 | 2077.0  |
| weighted avg | 0.832166 | 0.832203  | 0.832189 | 2077.0  |

The result of Model Number:Dataset Number:Featuregroup Number:Rescale of 74 : 0 : 2 :  
1

|              | f1-score | precision | recall   | support |
|--------------|----------|-----------|----------|---------|
| AFIB         | 0.730810 | 0.742391  | 0.719682 | 204.0   |
| GSVT         | 0.749594 | 0.743215  | 0.756088 | 300.0   |
| SB           | 0.762536 | 0.760837  | 0.764246 | 892.0   |
| SR           | 0.755311 | 0.756990  | 0.753654 | 681.0   |
| macro avg    | 0.749563 | 0.750858  | 0.748418 | 2077.0  |
| micro avg    | 0.755218 | 0.755218  | 0.755218 | 2077.0  |
| weighted avg | 0.755182 | 0.755219  | 0.755218 | 2077.0  |

The result of Model Number:Dataset Number:Featuregroup Number:Rescale of 74 : 0 : 3 :  
0

|              | f1-score | precision | recall   | support |
|--------------|----------|-----------|----------|---------|
| AFIB         | 0.725531 | 0.735342  | 0.716282 | 204.0   |
| GSVT         | 0.753089 | 0.751867  | 0.754342 | 300.0   |
| SB           | 0.769444 | 0.768419  | 0.770478 | 892.0   |
| SR           | 0.761579 | 0.760603  | 0.762584 | 681.0   |
| macro avg    | 0.752411 | 0.754058  | 0.750922 | 2077.0  |
| micro avg    | 0.760236 | 0.760236  | 0.760236 | 2077.0  |
| weighted avg | 0.760190 | 0.760217  | 0.760236 | 2077.0  |

The result of Model Number:Dataset Number:Featuregroup Number:Rescale of 74 : 0 : 3 :  
1

|      | f1-score | precision | recall   | support |
|------|----------|-----------|----------|---------|
| AFIB | 0.688432 | 0.690142  | 0.686777 | 875.0   |

GSVT 0.700288 0.702392 0.698285 691.0  
SB 0.742879 0.737837 0.747996 1553.0  
SR 0.728743 0.734153 0.723440 907.0  
macro avg 0.715086 0.716131 0.714125 4026.0  
micro avg 0.720627 0.720627 0.720627 4026.0  
weighted avg 0.720551 0.720557 0.720627 4026.0  
The result of Model Number:Dataset Number:Featuregroup Number:Rescale of 74 : 0 : 4 :  
0

f1-score precision recall support  
AFIB 0.666763 0.710206 0.628623 204.0  
GSVT 0.695972 0.678865 0.714059 300.0  
SB 0.716384 0.707181 0.725854 892.0  
SR 0.697776 0.706108 0.689685 681.0  
macro avg 0.694224 0.700590 0.689555 2077.0  
micro avg 0.702741 0.702741 0.702741 2077.0  
weighted avg 0.702461 0.703037 0.702741 2077.0  
The result of Model Number:Dataset Number:Featuregroup Number:Rescale of 74 : 0 : 4 :  
1

f1-score precision recall support  
AFIB 0.901865 0.910589 0.893469 204.0  
GSVT 0.933778 0.931937 0.935641 300.0  
SB 0.953295 0.951607 0.955002 892.0  
SR 0.944507 0.944964 0.944090 681.0  
macro avg 0.933361 0.934774 0.932051 2077.0  
micro avg 0.942584 0.942584 0.942584 2077.0  
weighted avg 0.942543 0.942559 0.942584 2077.0  
The result of Model Number:Dataset Number:Featuregroup Number:Rescale of 74 : 0 : 5 :  
0

f1-score precision recall support  
AFIB 0.731726 0.746338 0.717786 204.0  
GSVT 0.739943 0.730698 0.749538 300.0  
SB 0.754070 0.746860 0.761422 892.0  
SR 0.740376 0.750088 0.730932 681.0  
macro avg 0.741529 0.743496 0.739919 2077.0  
micro avg 0.745423 0.745423 0.745423 2077.0  
weighted avg 0.745345 0.745533 0.745423 2077.0  
The result of Model Number:Dataset Number:Featuregroup Number:Rescale of 74 : 0 : 5 :  
1

f1-score precision recall support  
AFIB 0.664564 0.663203 0.666413 875.0  
GSVT 0.673629 0.666558 0.680973 691.0  
SB 0.710453 0.700860 0.720451 1553.0  
SR 0.675882 0.701657 0.652087 907.0  
macro avg 0.681132 0.683069 0.679981 4026.0

micro avg 0.686529 0.686529 0.686529 4026.0  
weighted avg 0.686371 0.686968 0.686529 4026.0  
The result of Model Number:Dataset Number:Featuregroup Number:Rescale of 74 : 0 : 6 :  
0

|              | f1-score | precision | recall   | support |
|--------------|----------|-----------|----------|---------|
| AFIB         | 0.664075 | 0.665406  | 0.662777 | 875.0   |
| GSVT         | 0.665719 | 0.662125  | 0.669370 | 691.0   |
| SB           | 0.695900 | 0.692182  | 0.699663 | 1553.0  |
| SR           | 0.679252 | 0.687307  | 0.671402 | 907.0   |
| macro avg    | 0.676236 | 0.676755  | 0.675803 | 4026.0  |
| micro avg    | 0.680080 | 0.680080  | 0.680080 | 4026.0  |
| weighted avg | 0.680053 | 0.680106  | 0.680080 | 4026.0  |

The result of Model Number:Dataset Number:Featuregroup Number:Rescale of 74 : 0 : 6 :  
1

|              | f1-score | precision | recall   | support |
|--------------|----------|-----------|----------|---------|
| AFIB         | 0.632005 | 0.700272  | 0.575982 | 204.0   |
| GSVT         | 0.732629 | 0.720714  | 0.745060 | 300.0   |
| SB           | 0.781304 | 0.777747  | 0.784895 | 892.0   |
| SR           | 0.762426 | 0.752724  | 0.772392 | 681.0   |
| macro avg    | 0.727091 | 0.737864  | 0.719582 | 2077.0  |
| micro avg    | 0.754523 | 0.754523  | 0.754523 | 2077.0  |
| weighted avg | 0.753420 | 0.753695  | 0.754523 | 2077.0  |

The result of Model Number:Dataset Number:Featuregroup Number:Rescale of 74 : 0 : 7 :  
0

|              | f1-score | precision | recall   | support |
|--------------|----------|-----------|----------|---------|
| AFIB         | 0.703216 | 0.758025  | 0.656125 | 204.0   |
| GSVT         | 0.724660 | 0.736927  | 0.712826 | 300.0   |
| SB           | 0.768004 | 0.760935  | 0.775228 | 892.0   |
| SR           | 0.737436 | 0.726742  | 0.748483 | 681.0   |
| macro avg    | 0.733329 | 0.745657  | 0.723165 | 2077.0  |
| micro avg    | 0.745748 | 0.745748  | 0.745748 | 2077.0  |
| weighted avg | 0.745357 | 0.745971  | 0.745748 | 2077.0  |

The result of Model Number:Dataset Number:Featuregroup Number:Rescale of 74 : 0 : 7 :  
1

|              | f1-score | precision | recall   | support |
|--------------|----------|-----------|----------|---------|
| AFIB         | 0.801353 | 0.820389  | 0.783255 | 204.0   |
| GSVT         | 0.827676 | 0.819915  | 0.835671 | 300.0   |
| SB           | 0.845451 | 0.844505  | 0.846399 | 892.0   |
| SR           | 0.837290 | 0.836449  | 0.838147 | 681.0   |
| macro avg    | 0.827943 | 0.830315  | 0.825868 | 2077.0  |
| micro avg    | 0.835942 | 0.835942  | 0.835942 | 2077.0  |
| weighted avg | 0.835877 | 0.835943  | 0.835942 | 2077.0  |

The result of Model Number:Dataset Number:Featuregroup Number:Rescale of 74 : 0 : 8 :  
0



f1-score precision recall support  
AFIB 0.808998 0.861709 0.762722 204.0  
GSVT 0.844439 0.823683 0.866383 300.0  
SB 0.869204 0.858039 0.880695 892.0  
SR 0.846628 0.856737 0.836811 681.0  
macro avg 0.842317 0.850042 0.836653 2077.0  
micro avg 0.852652 0.852652 0.852652 2077.0  
weighted avg 0.852312 0.853010 0.852652 2077.0  
The result of Model Number:Dataset Number:Featuregroup Number:Rescale of 74 : 0 : 8 :  
1

f1-score precision recall support  
AFIB 0.669667 0.671367 0.668000 875.0  
GSVT 0.681484 0.674102 0.689058 691.0  
SB 0.718247 0.710122 0.726571 1553.0  
SR 0.685408 0.704172 0.667645 907.0  
macro avg 0.688702 0.689941 0.687819 4026.0  
micro avg 0.694128 0.694128 0.694128 4026.0  
weighted avg 0.693981 0.694177 0.694128 4026.0  
The result of Model Number:Dataset Number:Featuregroup Number:Rescale of 74 : 0 : 9 :  
0

f1-score precision recall support  
AFIB 0.809921 0.812295 0.807622 875.0  
GSVT 0.823322 0.812748 0.834282 691.0  
SB 0.871350 0.869232 0.873482 1553.0  
SR 0.849286 0.859365 0.839450 907.0  
macro avg 0.838470 0.838410 0.838709 4026.0  
micro avg 0.844773 0.844773 0.844773 4026.0  
weighted avg 0.844785 0.844940 0.844773 4026.0  
The result of Model Number:Dataset Number:Featuregroup Number:Rescale of 74 : 0 : 9 :  
1

f1-score precision recall support  
AFIB 0.796725 0.808431 0.785428 204.0  
GSVT 0.816912 0.809967 0.823994 300.0  
SB 0.831031 0.827706 0.834384 892.0  
SR 0.822812 0.826850 0.818822 681.0  
macro avg 0.816870 0.818238 0.815657 2077.0  
micro avg 0.822972 0.822972 0.822972 2077.0  
weighted avg 0.822927 0.822970 0.822972 2077.0  
The result of Model Number:Dataset Number:Featuregroup Number:Rescale of 74 : 0 :  
10 : 0

f1-score precision recall support  
AFIB 0.689219 0.689342 0.689126 875.0  
GSVT 0.696511 0.698864 0.694218 691.0  
SB 0.731649 0.729126 0.734193 1553.0

SR 0.717755 0.720176 0.715377 907.0  
macro avg 0.708783 0.709377 0.708228 4026.0  
micro avg 0.713298 0.713298 0.713298 4026.0  
weighted avg 0.713266 0.713269 0.713298 4026.0  
The result of Model Number:Dataset Number:Featuregroup Number:Rescale of 74 : 0 :  
10 : 1

f1-score precision recall support  
AFIB 0.680414 0.681593 0.679249 875.0  
GSVT 0.688664 0.680750 0.696820 691.0  
SB 0.725187 0.716442 0.734150 1553.0  
SR 0.690716 0.711645 0.670999 907.0  
macro avg 0.696245 0.697608 0.695305 4026.0  
micro avg 0.701584 0.701584 0.701584 4026.0  
weighted avg 0.701422 0.701661 0.701584 4026.0  
The result of Model Number:Dataset Number:Featuregroup Number:Rescale of 74 : 1 : 0 :  
0

f1-score precision recall support  
AFIB 0.788243 0.766380 0.813870 875.0  
GSVT 0.798533 0.832168 0.772424 691.0  
SB 0.877216 0.876773 0.877671 1553.0  
SR 0.855209 0.860561 0.849929 907.0  
macro avg 0.829800 0.833971 0.828474 4026.0  
micro avg 0.839491 0.839491 0.839491 4026.0  
weighted avg 0.839416 0.841473 0.839491 4026.0  
The result of Model Number:Dataset Number:Featuregroup Number:Rescale of 74 : 1 : 0 :  
1

f1-score precision recall support  
AFIB 0.695443 0.708790 0.682630 875.0  
GSVT 0.741320 0.742451 0.740239 691.0  
SB 0.807203 0.803655 0.810787 1553.0  
SR 0.762782 0.754490 0.771336 907.0  
macro avg 0.751687 0.752347 0.751248 4026.0  
micro avg 0.761938 0.761938 0.761938 4026.0  
weighted avg 0.761598 0.761456 0.761938 4026.0  
The result of Model Number:Dataset Number:Featuregroup Number:Rescale of 74 : 1 : 1 :  
0

f1-score precision recall support  
AFIB 0.858116 0.860749 0.855634 204.0  
GSVT 0.880658 0.878420 0.882986 300.0  
SB 0.900331 0.899231 0.901439 892.0  
SR 0.892962 0.894679 0.891259 681.0  
macro avg 0.883017 0.883270 0.882830 2077.0  
micro avg 0.890937 0.890937 0.890937 2077.0  
weighted avg 0.890927 0.890953 0.890937 2077.0

The result of Model Number:Dataset Number:Featuregroup Number:Rescale of 74 : 1 : 1 : 1

|              | f1-score | precision | recall   | support |
|--------------|----------|-----------|----------|---------|
| AFIB         | 0.798306 | 0.812957  | 0.784558 | 204.0   |
| GSVT         | 0.828611 | 0.821948  | 0.835534 | 300.0   |
| SB           | 0.843982 | 0.842475  | 0.845496 | 892.0   |
| SR           | 0.835625 | 0.836369  | 0.834887 | 681.0   |
| macro avg    | 0.826631 | 0.828437  | 0.825119 | 2077.0  |
| micro avg    | 0.834593 | 0.834593  | 0.834593 | 2077.0  |
| weighted avg | 0.834535 | 0.834609  | 0.834593 | 2077.0  |

The result of Model Number:Dataset Number:Featuregroup Number:Rescale of 74 : 1 : 2 : 0

|              | f1-score | precision | recall   | support |
|--------------|----------|-----------|----------|---------|
| AFIB         | 0.640337 | 0.710643  | 0.582844 | 204.0   |
| GSVT         | 0.747680 | 0.738333  | 0.757414 | 300.0   |
| SB           | 0.795495 | 0.791436  | 0.799597 | 892.0   |
| SR           | 0.776860 | 0.765998  | 0.788037 | 681.0   |
| macro avg    | 0.740093 | 0.751603  | 0.731973 | 2077.0  |
| micro avg    | 0.768424 | 0.768424  | 0.768424 | 2077.0  |
| weighted avg | 0.767239 | 0.767490  | 0.768424 | 2077.0  |

The result of Model Number:Dataset Number:Featuregroup Number:Rescale of 74 : 1 : 2 : 1

|              | f1-score | precision | recall   | support |
|--------------|----------|-----------|----------|---------|
| AFIB         | 0.776623 | 0.800176  | 0.754450 | 875.0   |
| GSVT         | 0.829056 | 0.823307  | 0.834931 | 691.0   |
| SB           | 0.907089 | 0.903619  | 0.910591 | 1553.0  |
| SR           | 0.857887 | 0.845011  | 0.871212 | 907.0   |
| macro avg    | 0.842664 | 0.843028  | 0.842796 | 4026.0  |
| micro avg    | 0.854799 | 0.854799  | 0.854799 | 4026.0  |
| weighted avg | 0.854256 | 0.854149  | 0.854799 | 4026.0  |

The result of Model Number:Dataset Number:Featuregroup Number:Rescale of 74 : 1 : 3 : 0

|              | f1-score | precision | recall   | support |
|--------------|----------|-----------|----------|---------|
| AFIB         | 0.690583 | 0.700770  | 0.680764 | 204.0   |
| GSVT         | 0.707536 | 0.704759  | 0.710358 | 300.0   |
| SB           | 0.723250 | 0.721800  | 0.724709 | 892.0   |
| SR           | 0.718120 | 0.718228  | 0.718018 | 681.0   |
| macro avg    | 0.709873 | 0.711389  | 0.708462 | 2077.0  |
| micro avg    | 0.716126 | 0.716126  | 0.716126 | 2077.0  |
| weighted avg | 0.716090 | 0.716102  | 0.716126 | 2077.0  |

The result of Model Number:Dataset Number:Featuregroup Number:Rescale of 74 : 1 : 3 : 1

|      | f1-score | precision | recall   | support |
|------|----------|-----------|----------|---------|
| AFIB | 0.759708 | 0.777767  | 0.742553 | 204.0   |

GSVT 0.779431 0.776423 0.782543 300.0  
SB 0.798745 0.796962 0.800535 892.0  
SR 0.788696 0.787109 0.790317 681.0  
macro avg 0.781645 0.784565 0.778987 2077.0  
micro avg 0.788891 0.788891 0.788891 2077.0  
weighted avg 0.788826 0.788880 0.788891 2077.0  
The result of Model Number:Dataset Number:Featuregroup Number:Rescale of 74 : 1 : 4 :  
0

f1-score precision recall support  
AFIB 0.922107 0.931059 0.913897 204.0  
GSVT 0.949748 0.945259 0.954532 300.0  
SB 0.968981 0.967900 0.970067 892.0  
SR 0.960455 0.961450 0.959467 681.0  
macro avg 0.950323 0.951417 0.949491 2077.0  
micro avg 0.958831 0.958831 0.958831 2077.0  
weighted avg 0.958804 0.958896 0.958831 2077.0  
The result of Model Number:Dataset Number:Featuregroup Number:Rescale of 74 : 1 : 4 :  
1

f1-score precision recall support  
AFIB 0.736795 0.743922 0.729936 204.0  
GSVT 0.762867 0.761363 0.764389 300.0  
SB 0.778812 0.777433 0.780207 892.0  
SR 0.771632 0.772006 0.771292 681.0  
macro avg 0.762527 0.763681 0.761456 2077.0  
micro avg 0.770062 0.770062 0.770062 2077.0  
weighted avg 0.770028 0.770041 0.770062 2077.0  
The result of Model Number:Dataset Number:Featuregroup Number:Rescale of 74 : 1 : 5 :  
0

f1-score precision recall support  
AFIB 0.770686 0.797441 0.745772 204.0  
GSVT 0.785463 0.776865 0.794351 300.0  
SB 0.806373 0.800583 0.812249 892.0  
SR 0.791972 0.795866 0.788130 681.0  
macro avg 0.788624 0.792689 0.785125 2077.0  
micro avg 0.795226 0.795226 0.795226 2077.0  
weighted avg 0.795126 0.795302 0.795226 2077.0  
The result of Model Number:Dataset Number:Featuregroup Number:Rescale of 74 : 1 : 5 :  
1

f1-score precision recall support  
AFIB 0.740490 0.741733 0.758843 204.0  
GSVT 0.733528 0.761994 0.708059 300.0  
SB 0.778066 0.735396 0.826312 892.0  
SR 0.674417 0.736657 0.623583 681.0  
macro avg 0.731625 0.743945 0.729199 2077.0

micro avg 0.736135 0.736135 0.736135 2077.0  
weighted avg 0.733958 0.740274 0.736135 2077.0  
The result of Model Number:Dataset Number:Featuregroup Number:Rescale of 74 : 1 : 6 :  
0

f1-score precision recall support  
AFIB 0.658840 0.674356 0.644079 875.0  
GSVT 0.694515 0.696269 0.692816 691.0  
SB 0.755298 0.752167 0.758458 1553.0  
SR 0.718671 0.707352 0.730391 907.0  
macro avg 0.706831 0.707536 0.706436 4026.0  
micro avg 0.716010 0.716010 0.716010 4026.0  
weighted avg 0.715650 0.715566 0.716010 4026.0

The result of Model Number:Dataset Number:Featuregroup Number:Rescale of 74 : 1 : 6 :  
1

f1-score precision recall support  
AFIB 0.746414 0.736045 0.757149 875.0  
GSVT 0.773087 0.783400 0.763142 691.0  
SB 0.821269 0.819586 0.822962 1553.0  
SR 0.799894 0.806074 0.793808 907.0  
macro avg 0.785166 0.786277 0.784265 4026.0  
micro avg 0.791823 0.791823 0.791823 4026.0  
weighted avg 0.791915 0.792175 0.791823 4026.0

The result of Model Number:Dataset Number:Featuregroup Number:Rescale of 74 : 1 : 7 :  
0

f1-score precision recall support  
AFIB 0.564705 0.625702 0.514647 204.0  
GSVT 0.654613 0.643967 0.665721 300.0  
SB 0.698105 0.694926 0.701313 892.0  
SR 0.681237 0.672568 0.690142 681.0  
macro avg 0.649665 0.659291 0.642956 2077.0  
micro avg 0.674175 0.674175 0.674175 2077.0  
weighted avg 0.673190 0.673436 0.674175 2077.0

The result of Model Number:Dataset Number:Featuregroup Number:Rescale of 74 : 1 : 7 :  
1

f1-score precision recall support  
AFIB 0.849094 0.832179 0.866754 875.0  
GSVT 0.691087 0.642674 0.866258 691.0  
SB 0.560741 0.561707 0.559779 1553.0  
SR 0.909033 0.917037 0.901205 907.0  
macro avg 0.752489 0.738400 0.798499 4026.0  
micro avg 0.756017 0.756017 0.756017 4026.0  
weighted avg 0.724248 0.714438 0.756017 4026.0

The result of Model Number:Dataset Number:Featuregroup Number:Rescale of 74 : 1 : 8 :  
0

f1-score precision recall support  
AFIB 0.683389 0.693429 0.673698 204.0  
GSVT 0.700704 0.694746 0.706778 300.0  
SB 0.712814 0.709962 0.715690 892.0  
SR 0.705764 0.709228 0.702342 681.0  
macro avg 0.700667 0.701841 0.699627 2077.0  
micro avg 0.705902 0.705902 0.705902 2077.0  
weighted avg 0.705863 0.705900 0.705902 2077.0  
The result of Model Number:Dataset Number:Featuregroup Number:Rescale of 74 : 1 : 8 :  
1

f1-score precision recall support  
AFIB 0.831263 0.829163 0.833503 875.0  
GSVT 0.847481 0.842821 0.852238 691.0  
SB 0.887379 0.882029 0.892807 1553.0  
SR 0.861215 0.876759 0.846229 907.0  
macro avg 0.856835 0.857693 0.856194 4026.0  
micro avg 0.862461 0.862461 0.862461 4026.0  
weighted avg 0.862441 0.862623 0.862461 4026.0  
The result of Model Number:Dataset Number:Featuregroup Number:Rescale of 74 : 1 : 9 :  
0

f1-score precision recall support  
AFIB 0.700213 0.713782 0.687465 204.0  
GSVT 0.727366 0.721284 0.733685 300.0  
SB 0.740938 0.739451 0.742433 892.0  
SR 0.733873 0.734633 0.733117 681.0  
macro avg 0.725597 0.727287 0.724175 2077.0  
micro avg 0.732716 0.732716 0.732716 2077.0  
weighted avg 0.732661 0.732726 0.732716 2077.0  
The result of Model Number:Dataset Number:Featuregroup Number:Rescale of 74 : 1 : 9 :  
1

f1-score precision recall support  
AFIB 0.923607 0.925061 0.922277 204.0  
GSVT 0.945944 0.944468 0.947504 300.0  
SB 0.965458 0.964280 0.966646 892.0  
SR 0.958696 0.960536 0.956868 681.0  
macro avg 0.948426 0.948586 0.948323 2077.0  
micro avg 0.956317 0.956317 0.956317 2077.0  
weighted avg 0.956312 0.956339 0.956317 2077.0  
The result of Model Number:Dataset Number:Featuregroup Number:Rescale of 74 : 1 :  
10 : 0

f1-score precision recall support  
AFIB 0.836906 0.831434 0.842525 875.0  
GSVT 0.861781 0.869113 0.854686 691.0  
SB 0.917482 0.915484 0.919491 1553.0

SR 0.895123 0.898716 0.891570 907.0  
macro avg 0.877823 0.878687 0.877068 4026.0  
micro avg 0.885350 0.885350 0.885350 4026.0  
weighted avg 0.885373 0.885480 0.885350 4026.0  
The result of Model Number:Dataset Number:Featuregroup Number:Rescale of 74 : 1 : 10 : 1

f1-score precision recall support  
AFIB 0.820463 0.865433 0.780480 204.0  
GSVT 0.781255 0.808646 0.755755 300.0  
SB 0.803597 0.772603 0.837195 892.0  
SR 0.715223 0.734627 0.696858 681.0  
macro avg 0.780134 0.795327 0.767572 2077.0  
micro avg 0.773848 0.773848 0.773848 2077.0  
weighted avg 0.773051 0.774475 0.773848 2077.0

The result of Model Number:Dataset Number:Featuregroup Number:Rescale of 75 : 0 : 0 : 0

f1-score precision recall support  
AFIB 0.694514 0.700020 0.689113 875.0  
GSVT 0.703319 0.700219 0.706472 691.0  
SB 0.747897 0.744941 0.750883 1553.0  
SR 0.729519 0.731580 0.727505 907.0  
macro avg 0.718813 0.719190 0.718493 4026.0  
micro avg 0.724569 0.724569 0.724569 4026.0  
weighted avg 0.724504 0.724492 0.724569 4026.0

The result of Model Number:Dataset Number:Featuregroup Number:Rescale of 75 : 0 : 0 : 1

f1-score precision recall support  
AFIB 0.762776 0.748517 0.777670 875.0  
GSVT 0.789495 0.801959 0.777511 691.0  
SB 0.839594 0.838094 0.841107 1553.0  
SR 0.818253 0.826922 0.809769 907.0  
macro avg 0.802529 0.803873 0.801514 4026.0  
micro avg 0.809345 0.809345 0.809345 4026.0  
weighted avg 0.809492 0.809907 0.809345 4026.0

The result of Model Number:Dataset Number:Featuregroup Number:Rescale of 75 : 0 : 1 : 0

f1-score precision recall support  
AFIB 0.724837 0.718356 0.731467 875.0  
GSVT 0.736474 0.739388 0.733610 691.0  
SB 0.785239 0.783782 0.786705 1553.0  
SR 0.765341 0.772416 0.758423 907.0  
macro avg 0.752973 0.753485 0.752551 4026.0  
micro avg 0.759215 0.759215 0.759215 4026.0  
weighted avg 0.759259 0.759382 0.759215 4026.0

The result of Model Number:Dataset Number:Featuregroup Number:Rescale of 75 : 0 : 1 :  
1

|              | f1-score | precision | recall   | support |
|--------------|----------|-----------|----------|---------|
| AFIB         | 0.776239 | 0.764638  | 0.788228 | 875.0   |
| GSVT         | 0.791122 | 0.797888  | 0.784483 | 691.0   |
| SB           | 0.845296 | 0.842385  | 0.848233 | 1553.0  |
| SR           | 0.820555 | 0.832793  | 0.808699 | 907.0   |
| macro avg    | 0.808303 | 0.809426  | 0.807410 | 4026.0  |
| micro avg    | 0.815343 | 0.815343  | 0.815343 | 4026.0  |
| weighted avg | 0.815416 | 0.815690  | 0.815343 | 4026.0  |

The result of Model Number:Dataset Number:Featuregroup Number:Rescale of 75 : 0 : 2 :  
0

|              | f1-score | precision | recall   | support |
|--------------|----------|-----------|----------|---------|
| AFIB         | 0.657649 | 0.712549  | 0.611914 | 204.0   |
| GSVT         | 0.705405 | 0.696535  | 0.714791 | 300.0   |
| SB           | 0.723413 | 0.713278  | 0.733924 | 892.0   |
| SR           | 0.703679 | 0.706976  | 0.700756 | 681.0   |
| macro avg    | 0.697536 | 0.707334  | 0.690346 | 2077.0  |
| micro avg    | 0.708302 | 0.708302  | 0.708302 | 2077.0  |
| weighted avg | 0.707882 | 0.708722  | 0.708302 | 2077.0  |

The result of Model Number:Dataset Number:Featuregroup Number:Rescale of 75 : 0 : 2 :  
1

|              | f1-score | precision | recall   | support |
|--------------|----------|-----------|----------|---------|
| AFIB         | 0.757946 | 0.769956  | 0.746405 | 204.0   |
| GSVT         | 0.777428 | 0.770812  | 0.784162 | 300.0   |
| SB           | 0.790850 | 0.789088  | 0.792623 | 892.0   |
| SR           | 0.783357 | 0.785098  | 0.781639 | 681.0   |
| macro avg    | 0.777395 | 0.778739  | 0.776207 | 2077.0  |
| micro avg    | 0.783260 | 0.783260  | 0.783260 | 2077.0  |
| weighted avg | 0.783223 | 0.783261  | 0.783260 | 2077.0  |

The result of Model Number:Dataset Number:Featuregroup Number:Rescale of 75 : 0 : 3 :  
0

|              | f1-score | precision | recall   | support |
|--------------|----------|-----------|----------|---------|
| AFIB         | 0.750104 | 0.758684  | 0.742007 | 204.0   |
| GSVT         | 0.767662 | 0.763119  | 0.772271 | 300.0   |
| SB           | 0.736941 | 0.709720  | 0.782891 | 892.0   |
| SR           | 0.618177 | 0.621169  | 0.615230 | 681.0   |
| macro avg    | 0.718221 | 0.713173  | 0.728100 | 2077.0  |
| micro avg    | 0.722369 | 0.722369  | 0.722369 | 2077.0  |
| weighted avg | 0.703731 | 0.693208  | 0.722369 | 2077.0  |

The result of Model Number:Dataset Number:Featuregroup Number:Rescale of 75 : 0 : 3 :  
1

|      | f1-score | precision | recall   | support |
|------|----------|-----------|----------|---------|
| AFIB | 0.848957 | 0.839478  | 0.858662 | 875.0   |



GSVT 0.865848 0.873778 0.858073 691.0  
SB 0.923466 0.920459 0.926497 1553.0  
SR 0.899526 0.908538 0.890695 907.0  
macro avg 0.884449 0.885563 0.883482 4026.0  
micro avg 0.891944 0.891944 0.891944 4026.0  
weighted avg 0.891990 0.892161 0.891944 4026.0  
The result of Model Number:Dataset Number:Featuregroup Number:Rescale of 75 : 0 : 4 :  
0

f1-score precision recall support  
AFIB 0.830638 0.838729 0.822903 204.0  
GSVT 0.849846 0.845944 0.853813 300.0  
SB 0.861590 0.858626 0.864581 892.0  
SR 0.854314 0.857628 0.851065 681.0  
macro avg 0.849097 0.850232 0.848091 2077.0  
micro avg 0.854501 0.854501 0.854501 2077.0  
weighted avg 0.854468 0.854513 0.854501 2077.0  
The result of Model Number:Dataset Number:Featuregroup Number:Rescale of 75 : 0 : 4 :  
1

f1-score precision recall support  
AFIB 0.730226 0.821074 0.658122 204.0  
GSVT 0.866359 0.847859 0.885723 300.0  
SB 0.924855 0.920140 0.929622 892.0  
SR 0.904106 0.892657 0.915911 681.0  
macro avg 0.856386 0.870432 0.847345 2077.0  
micro avg 0.892120 0.892120 0.892120 2077.0  
weighted avg 0.890486 0.890959 0.892120 2077.0  
The result of Model Number:Dataset Number:Featuregroup Number:Rescale of 75 : 0 : 5 :  
0

f1-score precision recall support  
AFIB 0.673511 0.674678 0.672358 875.0  
GSVT 0.681677 0.673844 0.689751 691.0  
SB 0.717830 0.709174 0.726702 1553.0  
SR 0.683709 0.704426 0.664192 907.0  
macro avg 0.689182 0.690531 0.688251 4026.0  
micro avg 0.694466 0.694466 0.694466 4026.0  
weighted avg 0.694306 0.694543 0.694466 4026.0  
The result of Model Number:Dataset Number:Featuregroup Number:Rescale of 75 : 0 : 5 :  
1

f1-score precision recall support  
AFIB 0.757774 0.771408 0.744836 204.0  
GSVT 0.774869 0.763974 0.786208 300.0  
SB 0.786791 0.777496 0.796317 892.0  
SR 0.770968 0.784694 0.757722 681.0  
macro avg 0.772600 0.774393 0.771271 2077.0

micro avg 0.777146 0.777146 0.777146 2077.0  
weighted avg 0.777031 0.777305 0.777146 2077.0  
The result of Model Number:Dataset Number:Featuregroup Number:Rescale of 75 : 0 : 6 :  
0

|              | f1-score | precision | recall   | support |
|--------------|----------|-----------|----------|---------|
| AFIB         | 0.679719 | 0.683776  | 0.675728 | 204.0   |
| GSVT         | 0.696420 | 0.693430  | 0.699437 | 300.0   |
| SB           | 0.708347 | 0.707321  | 0.709378 | 892.0   |
| SR           | 0.701870 | 0.703320  | 0.700430 | 681.0   |
| macro avg    | 0.696589 | 0.696962  | 0.696243 | 2077.0  |
| micro avg    | 0.701703 | 0.701703  | 0.701703 | 2077.0  |
| weighted avg | 0.701689 | 0.701690  | 0.701703 | 2077.0  |

The result of Model Number:Dataset Number:Featuregroup Number:Rescale of 75 : 0 : 6 :  
1

|              | f1-score | precision | recall   | support |
|--------------|----------|-----------|----------|---------|
| AFIB         | 0.865785 | 0.857864  | 0.873892 | 875.0   |
| GSVT         | 0.876879 | 0.884615  | 0.869407 | 691.0   |
| SB           | 0.932094 | 0.927180  | 0.937074 | 1553.0  |
| SR           | 0.911023 | 0.922002  | 0.900386 | 907.0   |
| macro avg    | 0.896445 | 0.897915  | 0.895190 | 4026.0  |
| micro avg    | 0.903463 | 0.903463  | 0.903463 | 4026.0  |
| weighted avg | 0.903459 | 0.903643  | 0.903463 | 4026.0  |

The result of Model Number:Dataset Number:Featuregroup Number:Rescale of 75 : 0 : 7 :  
0

|              | f1-score | precision | recall   | support |
|--------------|----------|-----------|----------|---------|
| AFIB         | 0.749682 | 0.748092  | 0.751314 | 875.0   |
| GSVT         | 0.761395 | 0.757745  | 0.765143 | 691.0   |
| SB           | 0.801365 | 0.791798  | 0.811167 | 1553.0  |
| SR           | 0.764124 | 0.785772  | 0.743652 | 907.0   |
| macro avg    | 0.769141 | 0.770852  | 0.767819 | 4026.0  |
| micro avg    | 0.775050 | 0.775050  | 0.775050 | 4026.0  |
| weighted avg | 0.774882 | 0.775097  | 0.775050 | 4026.0  |

The result of Model Number:Dataset Number:Featuregroup Number:Rescale of 75 : 0 : 7 :  
1

|              | f1-score | precision | recall   | support |
|--------------|----------|-----------|----------|---------|
| AFIB         | 0.692668 | 0.683074  | 0.702563 | 875.0   |
| GSVT         | 0.708031 | 0.713761  | 0.702396 | 691.0   |
| SB           | 0.751566 | 0.749407  | 0.753743 | 1553.0  |
| SR           | 0.733283 | 0.742827  | 0.723988 | 907.0   |
| macro avg    | 0.721387 | 0.722267  | 0.720673 | 4026.0  |
| micro avg    | 0.727103 | 0.727103  | 0.727103 | 4026.0  |
| weighted avg | 0.727174 | 0.727390  | 0.727103 | 4026.0  |

The result of Model Number:Dataset Number:Featuregroup Number:Rescale of 75 : 0 : 8 :  
0

f1-score precision recall support  
AFIB 0.678905 0.652951 0.721611 875.0  
GSVT 0.703461 0.679183 0.736391 691.0  
SB 0.783786 0.769951 0.798988 1553.0  
SR 0.663849 0.798240 0.573144 907.0  
macro avg 0.707500 0.725081 0.707534 4026.0  
micro avg 0.720548 0.720548 0.720548 4026.0  
weighted avg 0.720185 0.735317 0.720548 4026.0  
The result of Model Number:Dataset Number:Featuregroup Number:Rescale of 75 : 0 : 8 :  
1

f1-score precision recall support  
AFIB 0.706103 0.779959 0.645231 204.0  
GSVT 0.830682 0.819714 0.842036 300.0  
SB 0.880934 0.877511 0.884390 892.0  
SR 0.859766 0.847513 0.872388 681.0  
macro avg 0.819371 0.831174 0.811011 2077.0  
micro avg 0.850848 0.850848 0.850848 2077.0  
weighted avg 0.849564 0.849746 0.850848 2077.0  
The result of Model Number:Dataset Number:Featuregroup Number:Rescale of 75 : 0 : 9 :  
0

f1-score precision recall support  
AFIB 0.860122 0.875598 0.845438 204.0  
GSVT 0.879527 0.867160 0.892397 300.0  
SB 0.893060 0.882508 0.903871 892.0  
SR 0.875099 0.890679 0.860064 681.0  
macro avg 0.876952 0.878986 0.875442 2077.0  
micro avg 0.882111 0.882111 0.882111 2077.0  
weighted avg 0.881981 0.882291 0.882111 2077.0  
The result of Model Number:Dataset Number:Featuregroup Number:Rescale of 75 : 0 : 9 :  
1

f1-score precision recall support  
AFIB 0.669894 0.663969 0.675953 875.0  
GSVT 0.609050 0.589818 0.677580 691.0  
SB 0.549091 0.527203 0.583320 1553.0  
SR 0.565918 0.571774 0.560218 907.0  
macro avg 0.598488 0.588191 0.624268 4026.0  
micro avg 0.614426 0.614426 0.614426 4026.0  
weighted avg 0.589428 0.577716 0.614426 4026.0  
The result of Model Number:Dataset Number:Featuregroup Number:Rescale of 75 : 0 :  
10 : 0

f1-score precision recall support  
AFIB 0.859021 0.867804 0.850486 875.0  
GSVT 0.858763 0.845496 0.872554 691.0  
SB 0.905880 0.900471 0.911363 1553.0

SR 0.881903 0.893707 0.870433 907.0  
macro avg 0.876392 0.876870 0.876209 4026.0  
micro avg 0.882250 0.882250 0.882250 4026.0  
weighted avg 0.882207 0.882412 0.882250 4026.0  
The result of Model Number:Dataset Number:Featuregroup Number:Rescale of 75 : 0 :  
10 : 1

f1-score precision recall support  
AFIB 0.856588 0.850799 0.862573 875.0  
GSVT 0.877486 0.877836 0.877250 691.0  
SB 0.932150 0.929772 0.934551 1553.0  
SR 0.906769 0.916900 0.896872 907.0  
macro avg 0.893249 0.893827 0.892812 4026.0  
micro avg 0.900584 0.900584 0.900584 4026.0  
weighted avg 0.900628 0.900794 0.900584 4026.0  
The result of Model Number:Dataset Number:Featuregroup Number:Rescale of 75 : 1 : 0 :  
0

f1-score precision recall support  
AFIB 0.788276 0.792030 0.784593 875.0  
GSVT 0.798014 0.783512 0.813146 691.0  
SB 0.844359 0.841126 0.847620 1553.0  
SR 0.819402 0.833428 0.805854 907.0  
macro avg 0.812513 0.812524 0.812803 4026.0  
micro avg 0.818596 0.818596 0.818596 4026.0  
weighted avg 0.818594 0.818833 0.818596 4026.0  
The result of Model Number:Dataset Number:Featuregroup Number:Rescale of 75 : 1 : 0 :  
1

f1-score precision recall support  
AFIB 0.744235 0.786572 0.706716 204.0  
GSVT 0.786489 0.777828 0.795384 300.0  
SB 0.798188 0.790246 0.806318 892.0  
SR 0.788915 0.791612 0.786361 681.0  
macro avg 0.779457 0.786565 0.773695 2077.0  
micro avg 0.788413 0.788413 0.788413 2077.0  
weighted avg 0.788159 0.788539 0.788413 2077.0  
The result of Model Number:Dataset Number:Featuregroup Number:Rescale of 75 : 1 : 1 :  
0

f1-score precision recall support  
AFIB 0.678806 0.682039 0.675634 875.0  
GSVT 0.687192 0.674703 0.700222 691.0  
SB 0.727101 0.724317 0.729909 1553.0  
SR 0.705609 0.717687 0.693943 907.0  
macro avg 0.699677 0.699686 0.699927 4026.0  
micro avg 0.704915 0.704915 0.704915 4026.0  
weighted avg 0.704913 0.705119 0.704915 4026.0

The result of Model Number:Dataset Number:Featuregroup Number:Rescale of 75 : 1 : 1 :  
1

|              | f1-score | precision | recall   | support |
|--------------|----------|-----------|----------|---------|
| AFIB         | 0.773698 | 0.775248  | 0.772186 | 875.0   |
| GSVT         | 0.775614 | 0.771426  | 0.779867 | 691.0   |
| SB           | 0.810777 | 0.806445  | 0.815161 | 1553.0  |
| SR           | 0.791380 | 0.800765  | 0.782235 | 907.0   |
| macro avg    | 0.787867 | 0.788471  | 0.787362 | 4026.0  |
| micro avg    | 0.792345 | 0.792345  | 0.792345 | 4026.0  |
| weighted avg | 0.792313 | 0.792375  | 0.792345 | 4026.0  |

The result of Model Number:Dataset Number:Featuregroup Number:Rescale of 75 : 1 : 2 :  
0

|              | f1-score | precision | recall   | support |
|--------------|----------|-----------|----------|---------|
| AFIB         | 0.679496 | 0.680673  | 0.678333 | 875.0   |
| GSVT         | 0.687735 | 0.679832  | 0.695880 | 691.0   |
| SB           | 0.724209 | 0.715476  | 0.733160 | 1553.0  |
| SR           | 0.689785 | 0.710685  | 0.670094 | 907.0   |
| macro avg    | 0.695306 | 0.696667  | 0.694367 | 4026.0  |
| micro avg    | 0.700638 | 0.700638  | 0.700638 | 4026.0  |
| weighted avg | 0.700476 | 0.700715  | 0.700638 | 4026.0  |

The result of Model Number:Dataset Number:Featuregroup Number:Rescale of 75 : 1 : 2 :  
1

|              | f1-score | precision | recall   | support |
|--------------|----------|-----------|----------|---------|
| AFIB         | 0.895454 | 0.906955  | 0.884286 | 875.0   |
| GSVT         | 0.905360 | 0.898039  | 0.912947 | 691.0   |
| SB           | 0.968476 | 0.965565  | 0.971408 | 1553.0  |
| SR           | 0.944495 | 0.944098  | 0.944905 | 907.0   |
| macro avg    | 0.928446 | 0.928664  | 0.928387 | 4026.0  |
| micro avg    | 0.936469 | 0.936469  | 0.936469 | 4026.0  |
| weighted avg | 0.936370 | 0.936401  | 0.936469 | 4026.0  |

The result of Model Number:Dataset Number:Featuregroup Number:Rescale of 75 : 1 : 3 :  
0

|              | f1-score | precision | recall   | support |
|--------------|----------|-----------|----------|---------|
| AFIB         | 0.890001 | 0.927450  | 0.855538 | 204.0   |
| GSVT         | 0.919861 | 0.905781  | 0.934525 | 300.0   |
| SB           | 0.942048 | 0.935291  | 0.948914 | 892.0   |
| SR           | 0.917598 | 0.922264  | 0.913014 | 681.0   |
| macro avg    | 0.917377 | 0.922697  | 0.912998 | 2077.0  |
| micro avg    | 0.925894 | 0.925894  | 0.925894 | 2077.0  |
| weighted avg | 0.925715 | 0.925987  | 0.925894 | 2077.0  |

The result of Model Number:Dataset Number:Featuregroup Number:Rescale of 75 : 1 : 3 :  
1

|      | f1-score | precision | recall   | support |
|------|----------|-----------|----------|---------|
| AFIB | 0.689108 | 0.692890  | 0.685411 | 875.0   |

GSVT 0.690072 0.681347 0.699131 691.0  
SB 0.725730 0.722818 0.728672 1553.0  
SR 0.710151 0.718772 0.701778 907.0  
macro avg 0.703765 0.703957 0.703748 4026.0  
micro avg 0.708141 0.708141 0.708141 4026.0  
weighted avg 0.708141 0.708284 0.708141 4026.0  
The result of Model Number:Dataset Number:Featuregroup Number:Rescale of 75 : 1 : 4 :  
0

f1-score precision recall support

AFIB 0.688378 0.685579 0.691218 875.0  
GSVT 0.698440 0.702663 0.694295 691.0  
SB 0.736637 0.735740 0.737538 1553.0  
SR 0.721269 0.722412 0.720151 907.0  
macro avg 0.711181 0.711598 0.710801 4026.0  
micro avg 0.716132 0.716132 0.716132 4026.0  
weighted avg 0.716130 0.716158 0.716132 4026.0  
The result of Model Number:Dataset Number:Featuregroup Number:Rescale of 75 : 1 : 4 :  
1

f1-score precision recall support

AFIB 0.833623 0.822902 0.844687 875.0  
GSVT 0.850593 0.857635 0.843700 691.0  
SB 0.909455 0.905407 0.913550 1553.0  
SR 0.883574 0.896642 0.870902 907.0  
macro avg 0.869311 0.870646 0.868210 4026.0  
micro avg 0.876987 0.876987 0.876987 4026.0  
weighted avg 0.877040 0.877302 0.876987 4026.0  
The result of Model Number:Dataset Number:Featuregroup Number:Rescale of 75 : 1 : 5 :  
0

f1-score precision recall support

AFIB 0.795751 0.793546 0.798029 875.0  
GSVT 0.802049 0.805874 0.798339 691.0  
SB 0.839604 0.836921 0.842307 1553.0  
SR 0.826181 0.830172 0.822267 907.0  
macro avg 0.815896 0.816628 0.815236 4026.0  
micro avg 0.820623 0.820623 0.820623 4026.0  
weighted avg 0.820603 0.820645 0.820623 4026.0  
The result of Model Number:Dataset Number:Featuregroup Number:Rescale of 75 : 1 : 5 :  
1

f1-score precision recall support

AFIB 0.722798 0.704301 0.742359 875.0  
GSVT 0.683267 0.721993 0.648643 691.0  
SB 0.724502 0.666716 0.793274 1553.0  
SR 0.578755 0.702974 0.491948 907.0  
macro avg 0.677330 0.698996 0.669056 4026.0

micro avg 0.689500 0.689500 0.689500 4026.0  
weighted avg 0.684220 0.692541 0.689500 4026.0  
The result of Model Number:Dataset Number:Featuregroup Number:Rescale of 75 : 1 : 6 :  
0

|              | f1-score | precision | recall   | support |
|--------------|----------|-----------|----------|---------|
| AFIB         | 0.821913 | 0.841911  | 0.803045 | 204.0   |
| GSVT         | 0.832245 | 0.820788  | 0.844137 | 300.0   |
| SB           | 0.849049 | 0.840571  | 0.857707 | 892.0   |
| SR           | 0.834225 | 0.845173  | 0.823582 | 681.0   |
| macro avg    | 0.834358 | 0.837111  | 0.832118 | 2077.0  |
| micro avg    | 0.839189 | 0.839189  | 0.839189 | 2077.0  |
| weighted avg | 0.839096 | 0.839354  | 0.839189 | 2077.0  |

The result of Model Number:Dataset Number:Featuregroup Number:Rescale of 75 : 1 : 6 :  
1

|              | f1-score | precision | recall   | support |
|--------------|----------|-----------|----------|---------|
| AFIB         | 0.738831 | 0.748321  | 0.729616 | 875.0   |
| GSVT         | 0.747005 | 0.740964  | 0.753265 | 691.0   |
| SB           | 0.799082 | 0.796679  | 0.801501 | 1553.0  |
| SR           | 0.779295 | 0.778967  | 0.779633 | 907.0   |
| macro avg    | 0.766053 | 0.766233  | 0.766004 | 4026.0  |
| micro avg    | 0.772672 | 0.772672  | 0.772672 | 4026.0  |
| weighted avg | 0.772591 | 0.772616  | 0.772672 | 4026.0  |

The result of Model Number:Dataset Number:Featuregroup Number:Rescale of 75 : 1 : 7 :  
0

|              | f1-score | precision | recall   | support |
|--------------|----------|-----------|----------|---------|
| AFIB         | 0.796665 | 0.790571  | 0.802958 | 875.0   |
| GSVT         | 0.814995 | 0.819452  | 0.810634 | 691.0   |
| SB           | 0.863014 | 0.862409  | 0.863625 | 1553.0  |
| SR           | 0.840091 | 0.844166  | 0.836098 | 907.0   |
| macro avg    | 0.828691 | 0.829149  | 0.828329 | 4026.0  |
| micro avg    | 0.835144 | 0.835144  | 0.835144 | 4026.0  |
| weighted avg | 0.835188 | 0.835313  | 0.835144 | 4026.0  |

The result of Model Number:Dataset Number:Featuregroup Number:Rescale of 75 : 1 : 7 :  
1

|              | f1-score | precision | recall   | support |
|--------------|----------|-----------|----------|---------|
| AFIB         | 0.808182 | 0.813839  | 0.802633 | 204.0   |
| GSVT         | 0.826986 | 0.822909  | 0.831116 | 300.0   |
| SB           | 0.843422 | 0.842019  | 0.844841 | 892.0   |
| SR           | 0.835028 | 0.837010  | 0.833065 | 681.0   |
| macro avg    | 0.828405 | 0.828944  | 0.827914 | 2077.0  |
| micro avg    | 0.834852 | 0.834852  | 0.834852 | 2077.0  |
| weighted avg | 0.834835 | 0.834848  | 0.834852 | 2077.0  |

The result of Model Number:Dataset Number:Featuregroup Number:Rescale of 75 : 1 : 8 :  
0

f1-score precision recall support  
AFIB 0.834462 0.836170 0.832852 204.0  
GSVT 0.852816 0.849501 0.856216 300.0  
SB 0.871748 0.870585 0.872919 892.0  
SR 0.865345 0.867903 0.862804 681.0  
macro avg 0.856093 0.856040 0.856198 2077.0  
micro avg 0.863255 0.863255 0.863255 2077.0  
weighted avg 0.863252 0.863280 0.863255 2077.0  
The result of Model Number:Dataset Number:Featuregroup Number:Rescale of 75 : 1 : 8 :  
1

f1-score precision recall support  
AFIB 0.923250 0.936814 0.910159 204.0  
GSVT 0.946643 0.938595 0.954849 300.0  
SB 0.963003 0.959151 0.966890 892.0  
SR 0.953479 0.958159 0.948856 681.0  
macro avg 0.946594 0.948180 0.945188 2077.0  
micro avg 0.953666 0.953666 0.953666 2077.0  
weighted avg 0.953613 0.953663 0.953666 2077.0  
The result of Model Number:Dataset Number:Featuregroup Number:Rescale of 75 : 1 : 9 :  
0

f1-score precision recall support  
AFIB 0.671985 0.674499 0.669776 875.0  
GSVT 0.687112 0.693740 0.680746 691.0  
SB 0.730615 0.722951 0.738498 1553.0  
SR 0.705314 0.711522 0.699457 907.0  
macro avg 0.698756 0.700678 0.697119 4026.0  
micro avg 0.704855 0.704855 0.704855 4026.0  
weighted avg 0.704706 0.704832 0.704855 4026.0  
The result of Model Number:Dataset Number:Featuregroup Number:Rescale of 75 : 1 : 9 :  
1

f1-score precision recall support  
AFIB 0.692789 0.719709 0.667859 875.0  
GSVT 0.744770 0.739270 0.750451 691.0  
SB 0.818445 0.814228 0.822712 1553.0  
SR 0.770232 0.755544 0.785584 907.0  
macro avg 0.756559 0.757188 0.756652 4026.0  
micro avg 0.768290 0.768290 0.768290 4026.0  
weighted avg 0.767628 0.767600 0.768290 4026.0  
The result of Model Number:Dataset Number:Featuregroup Number:Rescale of 75 : 1 :  
10 : 0

f1-score precision recall support  
AFIB 0.822273 0.817355 0.827363 875.0  
GSVT 0.829007 0.833483 0.824699 691.0  
SB 0.878624 0.876055 0.881220 1553.0



SR 0.858770 0.864938 0.852705 907.0  
macro avg 0.847169 0.847958 0.846497 4026.0  
micro avg 0.853390 0.853390 0.853390 4026.0  
weighted avg 0.853388 0.853486 0.853390 4026.0  
The result of Model Number:Dataset Number:Featuregroup Number:Rescale of 75 : 1 :  
10 : 1

f1-score precision recall support  
AFIB 0.891102 0.903152 0.879742 204.0  
GSVT 0.924949 0.923448 0.926488 300.0  
SB 0.945036 0.943777 0.946306 892.0  
SR 0.935376 0.934178 0.936611 681.0  
macro avg 0.924116 0.926139 0.922287 2077.0  
micro avg 0.933727 0.933727 0.933727 2077.0  
weighted avg 0.933670 0.933703 0.933727 2077.0

The result of Model Number:Dataset Number:Featuregroup Number:Rescale of 76 : 0 : 0 :  
0

f1-score precision recall support  
AFIB 0.836868 0.878681 0.799274 204.0  
GSVT 0.862098 0.846121 0.878990 300.0  
SB 0.881827 0.872938 0.890917 892.0  
SR 0.857370 0.865029 0.849924 681.0  
macro avg 0.859541 0.865692 0.854776 2077.0  
micro avg 0.866753 0.866753 0.866753 2077.0  
weighted avg 0.866543 0.867035 0.866753 2077.0

The result of Model Number:Dataset Number:Featuregroup Number:Rescale of 76 : 0 : 0 :  
1

f1-score precision recall support  
AFIB 0.677273 0.682109 0.672627 204.0  
GSVT 0.700955 0.700503 0.701421 300.0  
SB 0.714980 0.713394 0.716581 892.0  
SR 0.708589 0.709446 0.707755 681.0  
macro avg 0.700449 0.701363 0.699596 2077.0  
micro avg 0.707180 0.707180 0.707180 2077.0  
weighted avg 0.707155 0.707165 0.707180 2077.0

The result of Model Number:Dataset Number:Featuregroup Number:Rescale of 76 : 0 : 1 :  
0

f1-score precision recall support  
AFIB 0.740801 0.757150 0.725198 204.0  
GSVT 0.756991 0.744438 0.770065 300.0  
SB 0.771537 0.765502 0.777676 892.0  
SR 0.752813 0.761873 0.743966 681.0  
macro avg 0.755535 0.757241 0.754226 2077.0  
micro avg 0.760370 0.760370 0.760370 2077.0  
weighted avg 0.760278 0.760449 0.760370 2077.0

The result of Model Number:Dataset Number:Featuregroup Number:Rescale of 76 : 0 : 1 :  
1

|              | f1-score | precision | recall   | support |
|--------------|----------|-----------|----------|---------|
| AFIB         | 0.688060 | 0.693054  | 0.683188 | 875.0   |
| GSVT         | 0.703153 | 0.696618  | 0.709866 | 691.0   |
| SB           | 0.755684 | 0.751122  | 0.760306 | 1553.0  |
| SR           | 0.730917 | 0.739079  | 0.722937 | 907.0   |
| macro avg    | 0.719454 | 0.719968  | 0.719074 | 4026.0  |
| micro avg    | 0.726469 | 0.726469  | 0.726469 | 4026.0  |
| weighted avg | 0.726391 | 0.726434  | 0.726469 | 4026.0  |

The result of Model Number:Dataset Number:Featuregroup Number:Rescale of 76 : 0 : 2 :  
0

|              | f1-score | precision | recall   | support |
|--------------|----------|-----------|----------|---------|
| AFIB         | 0.686577 | 0.696296  | 0.677689 | 204.0   |
| GSVT         | 0.700831 | 0.687928  | 0.714357 | 300.0   |
| SB           | 0.715769 | 0.707855  | 0.723873 | 892.0   |
| SR           | 0.700726 | 0.714998  | 0.687055 | 681.0   |
| macro avg    | 0.700976 | 0.701769  | 0.700744 | 2077.0  |
| micro avg    | 0.705891 | 0.705891  | 0.705891 | 2077.0  |
| weighted avg | 0.705812 | 0.706183  | 0.705891 | 2077.0  |

The result of Model Number:Dataset Number:Featuregroup Number:Rescale of 76 : 0 : 2 :  
1

|              | f1-score | precision | recall   | support |
|--------------|----------|-----------|----------|---------|
| AFIB         | 0.741892 | 0.748037  | 0.835640 | 204.0   |
| GSVT         | 0.804532 | 0.770097  | 0.907701 | 300.0   |
| SB           | 0.734568 | 0.732015  | 0.737141 | 892.0   |
| SR           | 0.727264 | 0.727401  | 0.727132 | 681.0   |
| macro avg    | 0.752064 | 0.744388  | 0.801903 | 2077.0  |
| micro avg    | 0.768169 | 0.768169  | 0.768169 | 2077.0  |
| weighted avg | 0.742998 | 0.737577  | 0.768169 | 2077.0  |

The result of Model Number:Dataset Number:Featuregroup Number:Rescale of 76 : 0 : 3 :  
0

|              | f1-score | precision | recall   | support |
|--------------|----------|-----------|----------|---------|
| AFIB         | 0.891695 | 0.893520  | 0.889974 | 204.0   |
| GSVT         | 0.911308 | 0.907765  | 0.914941 | 300.0   |
| SB           | 0.931538 | 0.930295  | 0.932789 | 892.0   |
| SR           | 0.924696 | 0.927429  | 0.921981 | 681.0   |
| macro avg    | 0.914809 | 0.914752  | 0.914922 | 2077.0  |
| micro avg    | 0.922462 | 0.922462  | 0.922462 | 2077.0  |
| weighted avg | 0.922459 | 0.922489  | 0.922462 | 2077.0  |

The result of Model Number:Dataset Number:Featuregroup Number:Rescale of 76 : 0 : 3 :  
1

|      | f1-score | precision | recall   | support |
|------|----------|-----------|----------|---------|
| AFIB | 0.776985 | 0.781234  | 0.772808 | 875.0   |

GSVT 0.773282 0.766762 0.779992 691.0  
SB 0.813300 0.805598 0.821154 1553.0  
SR 0.783031 0.797638 0.768961 907.0  
macro avg 0.786650 0.787808 0.785729 4026.0  
micro avg 0.791823 0.791823 0.791823 4026.0  
weighted avg 0.791720 0.791844 0.791823 4026.0  
The result of Model Number:Dataset Number:Featuregroup Number:Rescale of 76 : 0 : 4 :  
0

f1-score precision recall support  
AFIB 0.777546 0.768332 0.787048 875.0  
GSVT 0.788612 0.796236 0.781211 691.0  
SB 0.836981 0.833779 0.840214 1553.0  
SR 0.817468 0.826899 0.808272 907.0  
macro avg 0.805152 0.806311 0.804186 4026.0  
micro avg 0.811336 0.811336 0.811336 4026.0  
weighted avg 0.811366 0.811561 0.811336 4026.0  
The result of Model Number:Dataset Number:Featuregroup Number:Rescale of 76 : 0 : 4 :  
1

f1-score precision recall support  
AFIB 0.887408 0.878482 0.896542 875.0  
GSVT 0.895349 0.903321 0.887583 691.0  
SB 0.947240 0.944333 0.950167 1553.0  
SR 0.928897 0.937028 0.920909 907.0  
macro avg 0.914723 0.915791 0.913800 4026.0  
micro avg 0.921179 0.921179 0.921179 4026.0  
weighted avg 0.921198 0.921336 0.921179 4026.0  
The result of Model Number:Dataset Number:Featuregroup Number:Rescale of 76 : 0 : 5 :  
0

f1-score precision recall support  
AFIB 0.697022 0.692633 0.785147 204.0  
GSVT 0.849681 0.845311 0.854240 300.0  
SB 0.873874 0.869716 0.878082 892.0  
SR 0.685456 0.687714 0.683626 681.0  
macro avg 0.776508 0.773843 0.800274 2077.0  
micro avg 0.801752 0.801752 0.801752 2077.0  
weighted avg 0.791232 0.789124 0.801752 2077.0  
The result of Model Number:Dataset Number:Featuregroup Number:Rescale of 76 : 0 : 5 :  
1

f1-score precision recall support  
AFIB 0.727020 0.754066 0.702173 204.0  
GSVT 0.674647 0.705954 0.646062 300.0  
SB 0.706720 0.664094 0.755206 892.0  
SR 0.620636 0.663758 0.582848 681.0  
macro avg 0.682256 0.696968 0.671572 2077.0

micro avg 0.677720 0.677720 0.677720 2077.0  
weighted avg 0.675856 0.678867 0.677720 2077.0  
The result of Model Number:Dataset Number:Featuregroup Number:Rescale of 76 : 0 : 6 :  
0

|              | f1-score | precision | recall   | support |
|--------------|----------|-----------|----------|---------|
| AFIB         | 0.770874 | 0.783090  | 0.759136 | 204.0   |
| GSVT         | 0.790689 | 0.783960  | 0.797538 | 300.0   |
| SB           | 0.804340 | 0.802547  | 0.806144 | 892.0   |
| SR           | 0.796719 | 0.798490  | 0.794971 | 681.0   |
| macro avg    | 0.790656 | 0.792022  | 0.789447 | 2077.0  |
| micro avg    | 0.796620 | 0.796620  | 0.796620 | 2077.0  |
| weighted avg | 0.796583 | 0.796621  | 0.796620 | 2077.0  |

The result of Model Number:Dataset Number:Featuregroup Number:Rescale of 76 : 0 : 6 :  
1

|              | f1-score | precision | recall   | support |
|--------------|----------|-----------|----------|---------|
| AFIB         | 0.872507 | 0.894976  | 0.851173 | 204.0   |
| GSVT         | 0.800677 | 0.765036  | 0.903564 | 300.0   |
| SB           | 0.918608 | 0.916459  | 0.920769 | 892.0   |
| SR           | 0.728749 | 0.728886  | 0.728621 | 681.0   |
| macro avg    | 0.830135 | 0.826339  | 0.851032 | 2077.0  |
| micro avg    | 0.848448 | 0.848448  | 0.848448 | 2077.0  |
| weighted avg | 0.834796 | 0.830977  | 0.848448 | 2077.0  |

The result of Model Number:Dataset Number:Featuregroup Number:Rescale of 76 : 0 : 7 :  
0

|              | f1-score | precision | recall   | support |
|--------------|----------|-----------|----------|---------|
| AFIB         | 0.744838 | 0.825292  | 0.678813 | 204.0   |
| GSVT         | 0.863426 | 0.849384  | 0.878077 | 300.0   |
| SB           | 0.920791 | 0.916599  | 0.925023 | 892.0   |
| SR           | 0.898542 | 0.887108  | 0.910288 | 681.0   |
| macro avg    | 0.856899 | 0.869596  | 0.848050 | 2077.0  |
| micro avg    | 0.889228 | 0.889228  | 0.889228 | 2077.0  |
| weighted avg | 0.887929 | 0.888253  | 0.889228 | 2077.0  |

The result of Model Number:Dataset Number:Featuregroup Number:Rescale of 76 : 0 : 7 :  
1

|              | f1-score | precision | recall   | support |
|--------------|----------|-----------|----------|---------|
| AFIB         | 0.765329 | 0.774083  | 0.757067 | 204.0   |
| GSVT         | 0.783243 | 0.778608  | 0.787946 | 300.0   |
| SB           | 0.751899 | 0.724125  | 0.798781 | 892.0   |
| SR           | 0.630725 | 0.633777  | 0.627717 | 681.0   |
| macro avg    | 0.732799 | 0.727648  | 0.742878 | 2077.0  |
| micro avg    | 0.737031 | 0.737031  | 0.737031 | 2077.0  |
| weighted avg | 0.718015 | 0.707278  | 0.737031 | 2077.0  |

The result of Model Number:Dataset Number:Featuregroup Number:Rescale of 76 : 0 : 8 :  
0

f1-score precision recall support  
AFIB 0.784972 0.792646 0.777629 875.0  
GSVT 0.778976 0.773066 0.785234 691.0  
SB 0.824246 0.815765 0.832977 1553.0  
SR 0.798083 0.810918 0.785873 907.0  
macro avg 0.796569 0.798099 0.795428 4026.0  
micro avg 0.802142 0.802142 0.802142 4026.0  
weighted avg 0.802046 0.802320 0.802142 4026.0  
The result of Model Number:Dataset Number:Featuregroup Number:Rescale of 76 : 0 : 8 :  
1

f1-score precision recall support  
AFIB 0.871248 0.868833 0.873741 875.0  
GSVT 0.878142 0.882330 0.874081 691.0  
SB 0.919261 0.916323 0.922220 1553.0  
SR 0.904564 0.908933 0.900279 907.0  
macro avg 0.893304 0.894105 0.892580 4026.0  
micro avg 0.898478 0.898478 0.898478 4026.0  
weighted avg 0.898457 0.898503 0.898478 4026.0  
The result of Model Number:Dataset Number:Featuregroup Number:Rescale of 76 : 0 : 9 :  
0

f1-score precision recall support  
AFIB 0.629988 0.613438 0.669427 875.0  
GSVT 0.606042 0.573627 0.690876 691.0  
SB 0.574256 0.570627 0.577949 1553.0  
SR 0.557799 0.567410 0.548664 907.0  
macro avg 0.592021 0.581275 0.621729 4026.0  
micro avg 0.610615 0.610615 0.610615 4026.0  
weighted avg 0.588117 0.579722 0.610615 4026.0  
The result of Model Number:Dataset Number:Featuregroup Number:Rescale of 76 : 0 : 9 :  
1

f1-score precision recall support  
AFIB 0.798605 0.832208 0.767681 204.0  
GSVT 0.825399 0.812765 0.838557 300.0  
SB 0.845307 0.839244 0.851468 892.0  
SR 0.823368 0.827555 0.819254 681.0  
macro avg 0.823170 0.827943 0.819240 2077.0  
micro avg 0.830812 0.830812 0.830812 2077.0  
weighted avg 0.830651 0.830896 0.830812 2077.0  
The result of Model Number:Dataset Number:Featuregroup Number:Rescale of 76 : 0 :  
10 : 0

f1-score precision recall support  
AFIB 0.663345 0.733485 0.605793 204.0  
GSVT 0.763264 0.754431 0.772453 300.0  
SB 0.806983 0.803665 0.810331 892.0

SR 0.789653 0.777957 0.801715 681.0  
macro avg 0.755811 0.767384 0.747573 2077.0  
micro avg 0.781945 0.781945 0.781945 2077.0  
weighted avg 0.780878 0.781232 0.781945 2077.0  
The result of Model Number:Dataset Number:Featuregroup Number:Rescale of 76 : 0 :  
10 : 1

f1-score precision recall support  
AFIB 0.804775 0.793596 0.816350 875.0  
GSVT 0.833533 0.844653 0.822811 691.0  
SB 0.885483 0.883669 0.887308 1553.0  
SR 0.862437 0.869101 0.855875 907.0  
macro avg 0.846557 0.847755 0.845586 4026.0  
micro avg 0.853735 0.853735 0.853735 4026.0  
weighted avg 0.853834 0.854114 0.853735 4026.0

The result of Model Number:Dataset Number:Featuregroup Number:Rescale of 76 : 1 : 0 :  
0

f1-score precision recall support  
AFIB 0.895497 0.896709 0.894460 875.0  
GSVT 0.909445 0.908978 0.909947 691.0  
SB 0.949821 0.946423 0.953247 1553.0  
SR 0.927076 0.932272 0.921997 907.0  
macro avg 0.920460 0.921095 0.919913 4026.0  
micro avg 0.925999 0.925999 0.925999 4026.0  
weighted avg 0.925961 0.926003 0.925999 4026.0

The result of Model Number:Dataset Number:Featuregroup Number:Rescale of 76 : 1 : 0 :  
1

f1-score precision recall support  
AFIB 0.735627 0.750007 0.721918 204.0  
GSVT 0.755841 0.750395 0.761392 300.0  
SB 0.769368 0.766374 0.772387 892.0  
SR 0.760959 0.763112 0.758834 681.0  
macro avg 0.755449 0.757472 0.753633 2077.0  
micro avg 0.761398 0.761398 0.761398 2077.0  
weighted avg 0.761343 0.761389 0.761398 2077.0

The result of Model Number:Dataset Number:Featuregroup Number:Rescale of 76 : 1 : 1 :  
0

f1-score precision recall support  
AFIB 0.650226 0.642966 0.657658 875.0  
GSVT 0.663162 0.669236 0.657208 691.0  
SB 0.707293 0.704990 0.709614 1553.0  
SR 0.688957 0.695859 0.682193 907.0  
macro avg 0.677410 0.678263 0.676668 4026.0  
micro avg 0.683150 0.683150 0.683150 4026.0  
weighted avg 0.683185 0.683316 0.683150 4026.0

The result of Model Number:Dataset Number:Featuregroup Number:Rescale of 76 : 1 : 1 : 1

|              | f1-score | precision | recall   | support |
|--------------|----------|-----------|----------|---------|
| AFIB         | 0.899050 | 0.930262  | 0.869986 | 204.0   |
| GSVT         | 0.916289 | 0.906258  | 0.926657 | 300.0   |
| SB           | 0.940681 | 0.933927  | 0.947536 | 892.0   |
| SR           | 0.923881 | 0.928424  | 0.919399 | 681.0   |
| macro avg    | 0.919975 | 0.924718  | 0.915895 | 2077.0  |
| micro avg    | 0.927678 | 0.927678  | 0.927678 | 2077.0  |
| weighted avg | 0.927561 | 0.927766  | 0.927678 | 2077.0  |

The result of Model Number:Dataset Number:Featuregroup Number:Rescale of 76 : 1 : 2 : 0

|              | f1-score | precision | recall   | support |
|--------------|----------|-----------|----------|---------|
| AFIB         | 0.842666 | 0.859494  | 0.826613 | 204.0   |
| GSVT         | 0.852129 | 0.841482  | 0.863178 | 300.0   |
| SB           | 0.868398 | 0.860095  | 0.876865 | 892.0   |
| SR           | 0.852628 | 0.863813  | 0.841752 | 681.0   |
| macro avg    | 0.853955 | 0.856221  | 0.852102 | 2077.0  |
| micro avg    | 0.858439 | 0.858439  | 0.858439 | 2077.0  |
| weighted avg | 0.858350 | 0.858566  | 0.858439 | 2077.0  |

The result of Model Number:Dataset Number:Featuregroup Number:Rescale of 76 : 1 : 2 : 1

|              | f1-score | precision | recall   | support |
|--------------|----------|-----------|----------|---------|
| AFIB         | 0.858405 | 0.874943  | 0.842887 | 204.0   |
| GSVT         | 0.874525 | 0.860315  | 0.889370 | 300.0   |
| SB           | 0.889125 | 0.878521  | 0.899990 | 892.0   |
| SR           | 0.872585 | 0.888945  | 0.856831 | 681.0   |
| macro avg    | 0.873660 | 0.875681  | 0.872270 | 2077.0  |
| micro avg    | 0.878697 | 0.878697  | 0.878697 | 2077.0  |
| weighted avg | 0.878576 | 0.878958  | 0.878697 | 2077.0  |

The result of Model Number:Dataset Number:Featuregroup Number:Rescale of 76 : 1 : 3 : 0

|              | f1-score | precision | recall   | support |
|--------------|----------|-----------|----------|---------|
| AFIB         | 0.701934 | 0.693744  | 0.712149 | 875.0   |
| GSVT         | 0.722247 | 0.713493  | 0.731801 | 691.0   |
| SB           | 0.733134 | 0.704834  | 0.774643 | 1553.0  |
| SR           | 0.582146 | 0.612854  | 0.554404 | 907.0   |
| macro avg    | 0.684865 | 0.681231  | 0.693249 | 4026.0  |
| micro avg    | 0.704091 | 0.704091  | 0.704091 | 4026.0  |
| weighted avg | 0.690469 | 0.683188  | 0.704091 | 4026.0  |

The result of Model Number:Dataset Number:Featuregroup Number:Rescale of 76 : 1 : 3 : 1

|      | f1-score | precision | recall   | support |
|------|----------|-----------|----------|---------|
| AFIB | 0.689803 | 0.689182  | 0.690492 | 875.0   |

GSVT 0.701754 0.695328 0.708354 691.0  
SB 0.736407 0.729932 0.742998 1553.0  
SR 0.701737 0.719086 0.685268 907.0  
macro avg 0.707425 0.708382 0.706778 4026.0  
micro avg 0.712634 0.712634 0.712634 4026.0  
weighted avg 0.712520 0.712693 0.712634 4026.0  
The result of Model Number:Dataset Number:Featuregroup Number:Rescale of 76 : 1 : 4 :  
0

f1-score precision recall support

AFIB 0.727582 0.727224 0.727996 875.0  
GSVT 0.743376 0.739718 0.747117 691.0  
SB 0.777584 0.772501 0.782741 1553.0  
SR 0.755449 0.767754 0.743552 907.0  
macro avg 0.750998 0.751799 0.750351 4026.0  
micro avg 0.755900 0.755900 0.755900 4026.0  
weighted avg 0.755859 0.755965 0.755900 4026.0

The result of Model Number:Dataset Number:Featuregroup Number:Rescale of 76 : 1 : 4 :  
1

f1-score precision recall support

AFIB 0.686713 0.765898 0.622457 204.0  
GSVT 0.809704 0.795611 0.824478 300.0  
SB 0.864514 0.860682 0.868389 892.0  
SR 0.844452 0.832906 0.856348 681.0  
macro avg 0.801346 0.813774 0.792918 2077.0  
micro avg 0.833944 0.833944 0.833944 2077.0  
weighted avg 0.832556 0.832866 0.833944 2077.0

The result of Model Number:Dataset Number:Featuregroup Number:Rescale of 76 : 1 : 5 :  
0

f1-score precision recall support

AFIB 0.863207 0.883727 0.843715 204.0  
GSVT 0.885617 0.882199 0.889154 300.0  
SB 0.907562 0.905537 0.909597 892.0  
SR 0.896144 0.894341 0.897986 681.0  
macro avg 0.888133 0.891451 0.885113 2077.0  
micro avg 0.896367 0.896367 0.896367 2077.0  
weighted avg 0.896292 0.896353 0.896367 2077.0

The result of Model Number:Dataset Number:Featuregroup Number:Rescale of 76 : 1 : 5 :  
1

f1-score precision recall support

AFIB 0.705184 0.710219 0.700346 204.0  
GSVT 0.729842 0.729371 0.730327 300.0  
SB 0.744445 0.742793 0.746111 892.0  
SR 0.737790 0.738683 0.736922 681.0  
macro avg 0.729315 0.730266 0.728427 2077.0



micro avg 0.736323 0.736323 0.736323 2077.0  
weighted avg 0.736297 0.736307 0.736323 2077.0  
The result of Model Number:Dataset Number:Featuregroup Number:Rescale of 76 : 1 : 6 :  
0

|              | f1-score | precision | recall   | support |
|--------------|----------|-----------|----------|---------|
| AFIB         | 0.744924 | 0.724262  | 0.769143 | 875.0   |
| GSVT         | 0.754648 | 0.786435  | 0.729974 | 691.0   |
| SB           | 0.829007 | 0.828588  | 0.829437 | 1553.0  |
| SR           | 0.808210 | 0.813267  | 0.803220 | 907.0   |
| macro avg    | 0.784197 | 0.788138  | 0.782944 | 4026.0  |
| micro avg    | 0.793355 | 0.793355  | 0.793355 | 4026.0  |
| weighted avg | 0.793285 | 0.795228  | 0.793355 | 4026.0  |

The result of Model Number:Dataset Number:Featuregroup Number:Rescale of 76 : 1 : 6 :  
1

|              | f1-score | precision | recall   | support |
|--------------|----------|-----------|----------|---------|
| AFIB         | 0.856694 | 0.854320  | 0.859146 | 875.0   |
| GSVT         | 0.863474 | 0.867592  | 0.859480 | 691.0   |
| SB           | 0.903905 | 0.901017  | 0.906815 | 1553.0  |
| SR           | 0.889454 | 0.893750  | 0.885240 | 907.0   |
| macro avg    | 0.878382 | 0.879170  | 0.877670 | 4026.0  |
| micro avg    | 0.883470 | 0.883470  | 0.883470 | 4026.0  |
| weighted avg | 0.883449 | 0.883494  | 0.883470 | 4026.0  |

The result of Model Number:Dataset Number:Featuregroup Number:Rescale of 76 : 1 : 7 :  
0

|              | f1-score | precision | recall   | support |
|--------------|----------|-----------|----------|---------|
| AFIB         | 0.664870 | 0.649232  | 0.699962 | 875.0   |
| GSVT         | 0.638880 | 0.632989  | 0.653438 | 691.0   |
| SB           | 0.692908 | 0.644119  | 0.750492 | 1553.0  |
| SR           | 0.432037 | 0.541844  | 0.359792 | 907.0   |
| macro avg    | 0.607174 | 0.617046  | 0.615921 | 4026.0  |
| micro avg    | 0.634833 | 0.634833  | 0.634833 | 4026.0  |
| weighted avg | 0.618771 | 0.620279  | 0.634833 | 4026.0  |

The result of Model Number:Dataset Number:Featuregroup Number:Rescale of 76 : 1 : 7 :  
1

|              | f1-score | precision | recall   | support |
|--------------|----------|-----------|----------|---------|
| AFIB         | 0.770671 | 0.781873  | 0.760133 | 204.0   |
| GSVT         | 0.787667 | 0.777011  | 0.798683 | 300.0   |
| SB           | 0.799522 | 0.791189  | 0.808037 | 892.0   |
| SR           | 0.783675 | 0.796643  | 0.771136 | 681.0   |
| macro avg    | 0.785384 | 0.786679  | 0.784497 | 2077.0  |
| micro avg    | 0.789882 | 0.789882  | 0.789882 | 2077.0  |
| weighted avg | 0.789780 | 0.790014  | 0.789882 | 2077.0  |

The result of Model Number:Dataset Number:Featuregroup Number:Rescale of 76 : 1 : 8 :  
0

|              | f1-score | precision | recall   | support |
|--------------|----------|-----------|----------|---------|
| AFIB         | 0.903287 | 0.910226  | 0.896659 | 204.0   |
| GSVT         | 0.935097 | 0.934200  | 0.936025 | 300.0   |
| SB           | 0.954228 | 0.952005  | 0.956470 | 892.0   |
| SR           | 0.945446 | 0.946720  | 0.944196 | 681.0   |
| macro avg    | 0.934514 | 0.935788  | 0.933338 | 2077.0  |
| micro avg    | 0.943618 | 0.943618  | 0.943618 | 2077.0  |
| weighted avg | 0.943582 | 0.943597  | 0.943618 | 2077.0  |

The result of Model Number:Dataset Number:Featuregroup Number:Rescale of 76 : 1 : 8 : 1

|              | f1-score | precision | recall   | support |
|--------------|----------|-----------|----------|---------|
| AFIB         | 0.677730 | 0.668115  | 0.687642 | 875.0   |
| GSVT         | 0.691673 | 0.698414  | 0.685066 | 691.0   |
| SB           | 0.736075 | 0.733676  | 0.738491 | 1553.0  |
| SR           | 0.718885 | 0.728073  | 0.709934 | 907.0   |
| macro avg    | 0.706091 | 0.707070  | 0.705283 | 4026.0  |
| micro avg    | 0.711837 | 0.711837  | 0.711837 | 4026.0  |
| weighted avg | 0.711901 | 0.712113  | 0.711837 | 4026.0  |

The result of Model Number:Dataset Number:Featuregroup Number:Rescale of 76 : 1 : 9 : 0

|              | f1-score | precision | recall   | support |
|--------------|----------|-----------|----------|---------|
| AFIB         | 0.705785 | 0.716968  | 0.695038 | 204.0   |
| GSVT         | 0.723926 | 0.717765  | 0.730197 | 300.0   |
| SB           | 0.736424 | 0.734783  | 0.738076 | 892.0   |
| SR           | 0.729447 | 0.731068  | 0.727847 | 681.0   |
| macro avg    | 0.723895 | 0.725146  | 0.722789 | 2077.0  |
| micro avg    | 0.729357 | 0.729357  | 0.729357 | 2077.0  |
| weighted avg | 0.729322 | 0.729357  | 0.729357 | 2077.0  |

The result of Model Number:Dataset Number:Featuregroup Number:Rescale of 76 : 1 : 9 : 1

|              | f1-score | precision | recall   | support |
|--------------|----------|-----------|----------|---------|
| AFIB         | 0.888759 | 0.885293  | 0.892316 | 875.0   |
| GSVT         | 0.905393 | 0.907302  | 0.903545 | 691.0   |
| SB           | 0.961105 | 0.958709  | 0.963517 | 1553.0  |
| SR           | 0.938934 | 0.945240  | 0.932731 | 907.0   |
| macro avg    | 0.923548 | 0.924136  | 0.923027 | 4026.0  |
| micro avg    | 0.930813 | 0.930813  | 0.930813 | 4026.0  |
| weighted avg | 0.930825 | 0.930895  | 0.930813 | 4026.0  |

The result of Model Number:Dataset Number:Featuregroup Number:Rescale of 76 : 1 : 10 : 0

|      | f1-score | precision | recall   | support |
|------|----------|-----------|----------|---------|
| AFIB | 0.836100 | 0.822987  | 0.849728 | 875.0   |
| GSVT | 0.805637 | 0.828733  | 0.783887 | 691.0   |
| SB   | 0.846591 | 0.803676  | 0.894395 | 1553.0  |

SR 0.687850 0.765437 0.624652 907.0  
macro avg 0.794045 0.805208 0.788166 4026.0  
micro avg 0.804951 0.804951 0.804951 4026.0  
weighted avg 0.801520 0.803559 0.804951 4026.0  
The result of Model Number:Dataset Number:Featuregroup Number:Rescale of 76 : 1 :  
10 : 1

f1-score precision recall support  
AFIB 0.894337 0.901426 0.887381 875.0  
GSVT 0.905675 0.901682 0.909734 691.0  
SB 0.963079 0.959271 0.966923 1553.0  
SR 0.939413 0.942067 0.936819 907.0  
macro avg 0.925626 0.926112 0.925214 4026.0  
micro avg 0.933038 0.933038 0.933038 4026.0  
weighted avg 0.932955 0.932939 0.933038 4026.0  
The result of Model Number:Dataset Number:Featuregroup Number:Rescale of 77 : 0 : 0 :  
0

f1-score precision recall support  
AFIB 0.800967 0.831468 0.772800 204.0  
GSVT 0.826486 0.818156 0.835024 300.0  
SB 0.843028 0.838832 0.847279 892.0  
SR 0.832845 0.833369 0.832349 681.0  
macro avg 0.825832 0.830456 0.821863 2077.0  
micro avg 0.833299 0.833299 0.833299 2077.0  
weighted avg 0.833169 0.833331 0.833299 2077.0  
The result of Model Number:Dataset Number:Featuregroup Number:Rescale of 77 : 0 : 0 :  
1

f1-score precision recall support  
AFIB 0.911588 0.913680 0.909605 875.0  
GSVT 0.914766 0.912187 0.917390 691.0  
SB 0.960032 0.952082 0.968129 1553.0  
SR 0.931232 0.945207 0.917703 907.0  
macro avg 0.929404 0.930789 0.928207 4026.0  
micro avg 0.935341 0.935341 0.935341 4026.0  
weighted avg 0.935246 0.935340 0.935341 4026.0  
The result of Model Number:Dataset Number:Featuregroup Number:Rescale of 77 : 0 : 1 :  
0

f1-score precision recall support  
AFIB 0.895017 0.896426 0.893728 204.0  
GSVT 0.916663 0.915232 0.918175 300.0  
SB 0.935573 0.934431 0.936724 892.0  
SR 0.929021 0.930804 0.927249 681.0  
macro avg 0.919068 0.919223 0.918969 2077.0  
micro avg 0.926715 0.926715 0.926715 2077.0  
weighted avg 0.926710 0.926736 0.926715 2077.0

The result of Model Number:Dataset Number:Featuregroup Number:Rescale of 77 : 0 : 1 :  
1

|              | f1-score | precision | recall   | support |
|--------------|----------|-----------|----------|---------|
| AFIB         | 0.843580 | 0.821419  | 0.896390 | 875.0   |
| GSVT         | 0.811516 | 0.768110  | 0.925111 | 691.0   |
| SB           | 0.768953 | 0.764094  | 0.773898 | 1553.0  |
| SR           | 0.746916 | 0.759786  | 0.734684 | 907.0   |
| macro avg    | 0.792741 | 0.778352  | 0.832521 | 4026.0  |
| micro avg    | 0.817639 | 0.817639  | 0.817639 | 4026.0  |
| weighted avg | 0.787513 | 0.776271  | 0.817639 | 4026.0  |

The result of Model Number:Dataset Number:Featuregroup Number:Rescale of 77 : 0 : 2 :  
0

|              | f1-score | precision | recall   | support |
|--------------|----------|-----------|----------|---------|
| AFIB         | 0.811316 | 0.820144  | 0.802912 | 204.0   |
| GSVT         | 0.838772 | 0.835274  | 0.842435 | 300.0   |
| SB           | 0.855960 | 0.855194  | 0.856727 | 892.0   |
| SR           | 0.847871 | 0.847878  | 0.847871 | 681.0   |
| macro avg    | 0.838480 | 0.839623  | 0.837486 | 2077.0  |
| micro avg    | 0.846473 | 0.846473  | 0.846473 | 2077.0  |
| weighted avg | 0.846440 | 0.846476  | 0.846473 | 2077.0  |

The result of Model Number:Dataset Number:Featuregroup Number:Rescale of 77 : 0 : 2 :  
1

|              | f1-score | precision | recall   | support |
|--------------|----------|-----------|----------|---------|
| AFIB         | 0.756293 | 0.780861  | 0.733368 | 204.0   |
| GSVT         | 0.770631 | 0.763732  | 0.777808 | 300.0   |
| SB           | 0.788955 | 0.783548  | 0.794439 | 892.0   |
| SR           | 0.776088 | 0.779363  | 0.772887 | 681.0   |
| macro avg    | 0.772992 | 0.776876  | 0.769625 | 2077.0  |
| micro avg    | 0.778972 | 0.778972  | 0.778972 | 2077.0  |
| weighted avg | 0.778882 | 0.779049  | 0.778972 | 2077.0  |

The result of Model Number:Dataset Number:Featuregroup Number:Rescale of 77 : 0 : 3 :  
0

|              | f1-score | precision | recall   | support |
|--------------|----------|-----------|----------|---------|
| AFIB         | 0.812819 | 0.820050  | 0.805756 | 875.0   |
| GSVT         | 0.829879 | 0.820772  | 0.839244 | 691.0   |
| SB           | 0.892530 | 0.885581  | 0.899597 | 1553.0  |
| SR           | 0.862870 | 0.875101  | 0.850980 | 907.0   |
| macro avg    | 0.849525 | 0.850376  | 0.848894 | 4026.0  |
| micro avg    | 0.857891 | 0.857891  | 0.857891 | 4026.0  |
| weighted avg | 0.857771 | 0.857854  | 0.857891 | 4026.0  |

The result of Model Number:Dataset Number:Featuregroup Number:Rescale of 77 : 0 : 3 :  
1

|      | f1-score | precision | recall   | support |
|------|----------|-----------|----------|---------|
| AFIB | 0.764175 | 0.787797  | 0.742595 | 204.0   |

GSVT 0.713348 0.728856 0.699012 300.0  
SB 0.752401 0.719009 0.789085 892.0  
SR 0.677455 0.712267 0.645983 681.0  
macro avg 0.726845 0.736982 0.719169 2077.0  
micro avg 0.724589 0.724589 0.724589 2077.0  
weighted avg 0.723344 0.724977 0.724589 2077.0  
The result of Model Number:Dataset Number:Featuregroup Number:Rescale of 77 : 0 : 4 :  
0

f1-score precision recall support

AFIB 0.764900 0.814738 0.721147 204.0  
GSVT 0.798409 0.778784 0.819157 300.0  
SB 0.821824 0.811267 0.832688 892.0  
SR 0.800478 0.810036 0.791196 681.0  
macro avg 0.796403 0.803706 0.791047 2077.0  
micro avg 0.806174 0.806174 0.806174 2077.0  
weighted avg 0.805852 0.806513 0.806174 2077.0  
The result of Model Number:Dataset Number:Featuregroup Number:Rescale of 77 : 0 : 4 :  
1

f1-score precision recall support

AFIB 0.693402 0.692287 0.694805 875.0  
GSVT 0.709570 0.705871 0.713348 691.0  
SB 0.741892 0.735606 0.748291 1553.0  
SR 0.713571 0.729435 0.698623 907.0  
macro avg 0.714609 0.715800 0.713767 4026.0  
micro avg 0.719480 0.719480 0.719480 4026.0  
weighted avg 0.719425 0.719697 0.719480 4026.0  
The result of Model Number:Dataset Number:Featuregroup Number:Rescale of 77 : 0 : 5 :  
0

f1-score precision recall support

AFIB 0.705221 0.678260 0.749581 875.0  
GSVT 0.730728 0.705509 0.764935 691.0  
SB 0.814167 0.799795 0.829958 1553.0  
SR 0.689581 0.829181 0.595360 907.0  
macro avg 0.734924 0.753186 0.734959 4026.0  
micro avg 0.748477 0.748477 0.748477 4026.0  
weighted avg 0.748100 0.763819 0.748477 4026.0  
The result of Model Number:Dataset Number:Featuregroup Number:Rescale of 77 : 0 : 5 :  
1

f1-score precision recall support

AFIB 0.864703 0.882049 0.848198 204.0  
GSVT 0.884743 0.875547 0.894182 300.0  
SB 0.901106 0.897601 0.904641 892.0  
SR 0.891637 0.895357 0.887968 681.0  
macro avg 0.885547 0.887638 0.883747 2077.0

micro avg 0.892120 0.892120 0.892120 2077.0  
weighted avg 0.892062 0.892152 0.892120 2077.0  
The result of Model Number:Dataset Number:Featuregroup Number:Rescale of 77 : 0 : 6 :  
0

|              | f1-score | precision | recall   | support |
|--------------|----------|-----------|----------|---------|
| AFIB         | 0.771072 | 0.765260  | 0.875157 | 204.0   |
| GSVT         | 0.934773 | 0.929238  | 0.940384 | 300.0   |
| SB           | 0.764514 | 0.762919  | 0.766121 | 892.0   |
| SR           | 0.945525 | 0.944012  | 0.947055 | 681.0   |
| macro avg    | 0.853971 | 0.850357  | 0.882179 | 2077.0  |
| micro avg    | 0.861324 | 0.861324  | 0.861324 | 2077.0  |
| weighted avg | 0.849100 | 0.846548  | 0.861324 | 2077.0  |

The result of Model Number:Dataset Number:Featuregroup Number:Rescale of 77 : 0 : 6 :  
1

|              | f1-score | precision | recall   | support |
|--------------|----------|-----------|----------|---------|
| AFIB         | 0.734249 | 0.809720  | 0.672098 | 204.0   |
| GSVT         | 0.873735 | 0.861927  | 0.885957 | 300.0   |
| SB           | 0.930465 | 0.926744  | 0.934220 | 892.0   |
| SR           | 0.905211 | 0.892974  | 0.917826 | 681.0   |
| macro avg    | 0.860915 | 0.872841  | 0.852525 | 2077.0  |
| micro avg    | 0.896128 | 0.896128  | 0.896128 | 2077.0  |
| weighted avg | 0.894719 | 0.894816  | 0.896128 | 2077.0  |

The result of Model Number:Dataset Number:Featuregroup Number:Rescale of 77 : 0 : 7 :  
0

|              | f1-score | precision | recall   | support |
|--------------|----------|-----------|----------|---------|
| AFIB         | 0.824931 | 0.844359  | 0.806449 | 875.0   |
| GSVT         | 0.869600 | 0.871796  | 0.867472 | 691.0   |
| SB           | 0.945706 | 0.941785  | 0.949662 | 1553.0  |
| SR           | 0.899845 | 0.885673  | 0.914520 | 907.0   |
| macro avg    | 0.885020 | 0.885903  | 0.884526 | 4026.0  |
| micro avg    | 0.896513 | 0.896513  | 0.896513 | 4026.0  |
| weighted avg | 0.896063 | 0.895957  | 0.896513 | 4026.0  |

The result of Model Number:Dataset Number:Featuregroup Number:Rescale of 77 : 0 : 7 :  
1

|              | f1-score | precision | recall   | support |
|--------------|----------|-----------|----------|---------|
| AFIB         | 0.686195 | 0.692425  | 0.680428 | 204.0   |
| GSVT         | 0.708874 | 0.704590  | 0.713396 | 300.0   |
| SB           | 0.723704 | 0.722735  | 0.724678 | 892.0   |
| SR           | 0.717008 | 0.718495  | 0.715533 | 681.0   |
| macro avg    | 0.708945 | 0.709561  | 0.708509 | 2077.0  |
| micro avg    | 0.715704 | 0.715704  | 0.715704 | 2077.0  |
| weighted avg | 0.715683 | 0.715747  | 0.715704 | 2077.0  |

The result of Model Number:Dataset Number:Featuregroup Number:Rescale of 77 : 0 : 8 :  
0

f1-score precision recall support  
AFIB 0.672879 0.668217 0.677741 875.0  
GSVT 0.683260 0.686032 0.680620 691.0  
SB 0.741338 0.733629 0.749214 1553.0  
SR 0.703907 0.720286 0.688321 907.0  
macro avg 0.700346 0.702041 0.698974 4026.0  
micro avg 0.708189 0.708189 0.708189 4026.0  
weighted avg 0.708058 0.708238 0.708189 4026.0  
The result of Model Number:Dataset Number:Featuregroup Number:Rescale of 77 : 0 : 8 :  
1

f1-score precision recall support  
AFIB 0.681772 0.680676 0.683151 875.0  
GSVT 0.697669 0.694032 0.701384 691.0  
SB 0.729449 0.723269 0.735741 1553.0  
SR 0.701603 0.717200 0.686905 907.0  
macro avg 0.702623 0.703794 0.701795 4026.0  
micro avg 0.707412 0.707412 0.707412 4026.0  
weighted avg 0.707359 0.707626 0.707412 4026.0  
The result of Model Number:Dataset Number:Featuregroup Number:Rescale of 77 : 0 : 9 :  
0

f1-score precision recall support  
AFIB 0.730601 0.715847 0.746035 875.0  
GSVT 0.754824 0.766825 0.743355 691.0  
SB 0.803144 0.803099 0.803195 1553.0  
SR 0.783671 0.790812 0.776671 907.0  
macro avg 0.768060 0.769146 0.767314 4026.0  
micro avg 0.774526 0.774526 0.774526 4026.0  
weighted avg 0.774697 0.775142 0.774526 4026.0  
The result of Model Number:Dataset Number:Featuregroup Number:Rescale of 77 : 0 : 9 :  
1

f1-score precision recall support  
AFIB 0.730595 0.730404 0.730857 875.0  
GSVT 0.745857 0.743037 0.748779 691.0  
SB 0.794078 0.790492 0.797707 1553.0  
SR 0.767316 0.776082 0.758774 907.0  
macro avg 0.759462 0.760004 0.759029 4026.0  
micro avg 0.766010 0.766010 0.766010 4026.0  
weighted avg 0.765975 0.766042 0.766010 4026.0  
The result of Model Number:Dataset Number:Featuregroup Number:Rescale of 77 : 0 :  
10 : 0

f1-score precision recall support  
AFIB 0.801022 0.784845 0.817944 875.0  
GSVT 0.827580 0.840738 0.815005 691.0  
SB 0.880557 0.880508 0.880613 1553.0

SR 0.859208 0.867037 0.851533 907.0  
macro avg 0.842092 0.843282 0.841274 4026.0  
micro avg 0.849181 0.849181 0.849181 4026.0  
weighted avg 0.849369 0.849856 0.849181 4026.0  
The result of Model Number:Dataset Number:Featuregroup Number:Rescale of 77 : 0 :

10 : 1

f1-score precision recall support

AFIB 0.862888 0.864868 0.861011 875.0  
GSVT 0.865896 0.863455 0.868380 691.0  
SB 0.908744 0.901219 0.916408 1553.0  
SR 0.881482 0.894711 0.868676 907.0  
macro avg 0.879753 0.881063 0.878619 4026.0  
micro avg 0.885372 0.885372 0.885372 4026.0  
weighted avg 0.885282 0.885371 0.885372 4026.0

The result of Model Number:Dataset Number:Featuregroup Number:Rescale of 77 : 1 : 0 :  
0

f1-score precision recall support

AFIB 0.686223 0.671559 0.701581 875.0  
GSVT 0.710627 0.721494 0.700146 691.0  
SB 0.757527 0.757627 0.757430 1553.0  
SR 0.738011 0.745654 0.730526 907.0  
macro avg 0.723097 0.724083 0.722421 4026.0  
micro avg 0.729399 0.729399 0.729399 4026.0  
weighted avg 0.729584 0.730022 0.729399 4026.0

The result of Model Number:Dataset Number:Featuregroup Number:Rescale of 77 : 1 : 0 :  
1

f1-score precision recall support

AFIB 0.614192 0.619279 0.691803 204.0  
GSVT 0.666050 0.637542 0.751460 300.0  
SB 0.608128 0.606015 0.610258 892.0  
SR 0.602082 0.602195 0.601972 681.0  
macro avg 0.622613 0.616258 0.663873 2077.0  
micro avg 0.635946 0.635946 0.635946 2077.0  
weighted avg 0.615107 0.610619 0.635946 2077.0

The result of Model Number:Dataset Number:Featuregroup Number:Rescale of 77 : 1 : 1 :  
0

f1-score precision recall support

AFIB 0.855371 0.857542 0.853242 875.0  
GSVT 0.870466 0.861037 0.880140 691.0  
SB 0.917423 0.907045 0.928055 1553.0  
SR 0.875477 0.899445 0.852788 907.0  
macro avg 0.879684 0.881267 0.878556 4026.0  
micro avg 0.886615 0.886615 0.886615 4026.0  
weighted avg 0.886428 0.886678 0.886615 4026.0



The result of Model Number:Dataset Number:Featuregroup Number:Rescale of 77 : 1 : 1 : 1

|              | f1-score | precision | recall   | support |
|--------------|----------|-----------|----------|---------|
| AFIB         | 0.793727 | 0.805388  | 0.782471 | 204.0   |
| GSVT         | 0.813837 | 0.806918  | 0.820893 | 300.0   |
| SB           | 0.827903 | 0.824590  | 0.831244 | 892.0   |
| SR           | 0.819715 | 0.823738  | 0.815740 | 681.0   |
| macro avg    | 0.813795 | 0.815159  | 0.812587 | 2077.0  |
| micro avg    | 0.819875 | 0.819875  | 0.819875 | 2077.0  |
| weighted avg | 0.819830 | 0.819872  | 0.819875 | 2077.0  |

The result of Model Number:Dataset Number:Featuregroup Number:Rescale of 77 : 1 : 2 : 0

|              | f1-score | precision | recall   | support |
|--------------|----------|-----------|----------|---------|
| AFIB         | 0.786758 | 0.774162  | 0.885262 | 204.0   |
| GSVT         | 0.921086 | 0.910398  | 0.932364 | 300.0   |
| SB           | 0.951927 | 0.948333  | 0.955556 | 892.0   |
| SR           | 0.746899 | 0.750761  | 0.743204 | 681.0   |
| macro avg    | 0.851668 | 0.845914  | 0.879096 | 2077.0  |
| micro avg    | 0.875677 | 0.875677  | 0.875677 | 2077.0  |
| weighted avg | 0.864026 | 0.860968  | 0.875677 | 2077.0  |

The result of Model Number:Dataset Number:Featuregroup Number:Rescale of 77 : 1 : 2 : 1

|              | f1-score | precision | recall   | support |
|--------------|----------|-----------|----------|---------|
| AFIB         | 0.848508 | 0.853165  | 0.843956 | 875.0   |
| GSVT         | 0.849695 | 0.838952  | 0.860849 | 691.0   |
| SB           | 0.893601 | 0.890015  | 0.897223 | 1553.0  |
| SR           | 0.874418 | 0.885033  | 0.864109 | 907.0   |
| macro avg    | 0.866555 | 0.866791  | 0.866534 | 4026.0  |
| micro avg    | 0.871943 | 0.871943  | 0.871943 | 4026.0  |
| weighted avg | 0.871943 | 0.872120  | 0.871943 | 4026.0  |

The result of Model Number:Dataset Number:Featuregroup Number:Rescale of 77 : 1 : 3 : 0

|              | f1-score | precision | recall   | support |
|--------------|----------|-----------|----------|---------|
| AFIB         | 0.903374 | 0.911706  | 0.895411 | 204.0   |
| GSVT         | 0.936401 | 0.936434  | 0.936392 | 300.0   |
| SB           | 0.956011 | 0.954313  | 0.957724 | 892.0   |
| SR           | 0.945865 | 0.945612  | 0.946142 | 681.0   |
| macro avg    | 0.935413 | 0.937016  | 0.933917 | 2077.0  |
| micro avg    | 0.944725 | 0.944725  | 0.944725 | 2077.0  |
| weighted avg | 0.944682 | 0.944693  | 0.944725 | 2077.0  |

The result of Model Number:Dataset Number:Featuregroup Number:Rescale of 77 : 1 : 3 : 1

|      | f1-score | precision | recall   | support |
|------|----------|-----------|----------|---------|
| AFIB | 0.634933 | 0.637525  | 0.632381 | 875.0   |

GSVT 0.591245 0.617339 0.567365 691.0  
SB 0.634962 0.575193 0.708601 1553.0  
SR 0.478974 0.596128 0.400465 907.0  
macro avg 0.585028 0.606546 0.577203 4026.0  
micro avg 0.598376 0.598376 0.598376 4026.0  
weighted avg 0.592310 0.600690 0.598376 4026.0  
The result of Model Number:Dataset Number:Featuregroup Number:Rescale of 77 : 1 : 4 :  
0

f1-score precision recall support  
AFIB 0.724756 0.728719 0.720860 875.0  
GSVT 0.721302 0.715220 0.727561 691.0  
SB 0.758630 0.751445 0.765956 1553.0  
SR 0.730396 0.744020 0.717271 907.0  
macro avg 0.733771 0.734851 0.732912 4026.0  
micro avg 0.738597 0.738597 0.738597 4026.0  
weighted avg 0.738500 0.738616 0.738597 4026.0  
The result of Model Number:Dataset Number:Featuregroup Number:Rescale of 77 : 1 : 4 :  
1

f1-score precision recall support  
AFIB 0.772480 0.779493 0.765988 204.0  
GSVT 0.798011 0.793188 0.803101 300.0  
SB 0.814706 0.813614 0.815801 892.0  
SR 0.807168 0.808841 0.805506 681.0  
macro avg 0.798091 0.798784 0.797599 2077.0  
micro avg 0.805699 0.805699 0.805699 2077.0  
weighted avg 0.805675 0.805747 0.805699 2077.0  
The result of Model Number:Dataset Number:Featuregroup Number:Rescale of 77 : 1 : 5 :  
0

f1-score precision recall support  
AFIB 0.891992 0.894325 0.889846 204.0  
GSVT 0.912117 0.908586 0.915752 300.0  
SB 0.932573 0.931329 0.933826 892.0  
SR 0.925104 0.927703 0.922523 681.0  
macro avg 0.915446 0.915486 0.915487 2077.0  
micro avg 0.923190 0.923190 0.923190 2077.0  
weighted avg 0.923184 0.923221 0.923190 2077.0  
The result of Model Number:Dataset Number:Featuregroup Number:Rescale of 77 : 1 : 5 :  
1

f1-score precision recall support  
AFIB 0.898860 0.923531 0.875539 204.0  
GSVT 0.919190 0.905068 0.933846 300.0  
SB 0.939385 0.930299 0.948653 892.0  
SR 0.915643 0.927085 0.904487 681.0  
macro avg 0.918269 0.921496 0.915631 2077.0

micro avg 0.924852 0.924852 0.924852 2077.0  
weighted avg 0.924703 0.924936 0.924852 2077.0  
The result of Model Number:Dataset Number:Featuregroup Number:Rescale of 77 : 1 : 6 :  
0

|              | f1-score | precision | recall   | support |
|--------------|----------|-----------|----------|---------|
| AFIB         | 0.807527 | 0.813928  | 0.801246 | 875.0   |
| GSVT         | 0.817764 | 0.814159  | 0.821429 | 691.0   |
| SB           | 0.869596 | 0.866158  | 0.873068 | 1553.0  |
| SR           | 0.848227 | 0.850624  | 0.845885 | 907.0   |
| macro avg    | 0.835779 | 0.836217  | 0.835407 | 4026.0  |
| micro avg    | 0.842471 | 0.842471  | 0.842471 | 4026.0  |
| weighted avg | 0.842396 | 0.842382  | 0.842471 | 4026.0  |

The result of Model Number:Dataset Number:Featuregroup Number:Rescale of 77 : 1 : 6 :  
1

|              | f1-score | precision | recall   | support |
|--------------|----------|-----------|----------|---------|
| AFIB         | 0.691004 | 0.706023  | 0.676800 | 204.0   |
| GSVT         | 0.719528 | 0.715284  | 0.723843 | 300.0   |
| SB           | 0.734987 | 0.733357  | 0.736632 | 892.0   |
| SR           | 0.727619 | 0.727208  | 0.728048 | 681.0   |
| macro avg    | 0.718284 | 0.720468  | 0.716331 | 2077.0  |
| micro avg    | 0.726094 | 0.726094  | 0.726094 | 2077.0  |
| weighted avg | 0.726018 | 0.726046  | 0.726094 | 2077.0  |

The result of Model Number:Dataset Number:Featuregroup Number:Rescale of 77 : 1 : 7 :  
0

|              | f1-score | precision | recall   | support |
|--------------|----------|-----------|----------|---------|
| AFIB         | 0.780572 | 0.784440  | 0.776825 | 875.0   |
| GSVT         | 0.788344 | 0.789480  | 0.787331 | 691.0   |
| SB           | 0.829838 | 0.825988  | 0.833734 | 1553.0  |
| SR           | 0.814562 | 0.816602  | 0.812577 | 907.0   |
| macro avg    | 0.803329 | 0.804128  | 0.802617 | 4026.0  |
| micro avg    | 0.808635 | 0.808635  | 0.808635 | 4026.0  |
| weighted avg | 0.808568 | 0.808578  | 0.808635 | 4026.0  |

The result of Model Number:Dataset Number:Featuregroup Number:Rescale of 77 : 1 : 7 :  
1

|              | f1-score | precision | recall   | support |
|--------------|----------|-----------|----------|---------|
| AFIB         | 0.777534 | 0.779507  | 0.775598 | 875.0   |
| GSVT         | 0.791254 | 0.782683  | 0.800048 | 691.0   |
| SB           | 0.833939 | 0.824505  | 0.843603 | 1553.0  |
| SR           | 0.795809 | 0.817597  | 0.775186 | 907.0   |
| macro avg    | 0.799634 | 0.801073  | 0.798609 | 4026.0  |
| micro avg    | 0.805934 | 0.805934  | 0.805934 | 4026.0  |
| weighted avg | 0.805764 | 0.805991  | 0.805934 | 4026.0  |

The result of Model Number:Dataset Number:Featuregroup Number:Rescale of 77 : 1 : 8 :  
0

f1-score precision recall support  
AFIB 0.771312 0.808705 0.737310 204.0  
GSVT 0.803435 0.792937 0.814378 300.0  
SB 0.825075 0.818801 0.831457 892.0  
SR 0.802102 0.804499 0.799755 681.0  
macro avg 0.800481 0.806235 0.795725 2077.0  
micro avg 0.809349 0.809349 0.809349 2077.0  
weighted avg 0.809136 0.809384 0.809349 2077.0  
The result of Model Number:Dataset Number:Featuregroup Number:Rescale of 77 : 1 : 8 :  
1

f1-score precision recall support  
AFIB 0.816180 0.792666 0.895507 875.0  
GSVT 0.899540 0.896667 0.902548 691.0  
SB 0.759345 0.748154 0.770937 1553.0  
SR 0.909224 0.926971 0.892259 907.0  
macro avg 0.846072 0.841114 0.865313 4026.0  
micro avg 0.847932 0.847932 0.847932 4026.0  
weighted avg 0.829525 0.823603 0.847932 4026.0  
The result of Model Number:Dataset Number:Featuregroup Number:Rescale of 77 : 1 : 9 :  
0

f1-score precision recall support  
AFIB 0.908147 0.918238 0.898741 204.0  
GSVT 0.936278 0.930948 0.941941 300.0  
SB 0.954904 0.953624 0.956188 892.0  
SR 0.946780 0.948049 0.945528 681.0  
macro avg 0.936527 0.937715 0.935600 2077.0  
micro avg 0.944993 0.944993 0.944993 2077.0  
weighted avg 0.944958 0.945045 0.944993 2077.0  
The result of Model Number:Dataset Number:Featuregroup Number:Rescale of 77 : 1 : 9 :  
1

f1-score precision recall support  
AFIB 0.800485 0.791547 0.809635 875.0  
GSVT 0.816411 0.823889 0.809080 691.0  
SB 0.870740 0.867904 0.873598 1553.0  
SR 0.848167 0.856664 0.839840 907.0  
macro avg 0.833951 0.835001 0.833038 4026.0  
micro avg 0.841018 0.841018 0.841018 4026.0  
weighted avg 0.841061 0.841222 0.841018 4026.0  
The result of Model Number:Dataset Number:Featuregroup Number:Rescale of 77 : 1 :  
10 : 0

f1-score precision recall support  
AFIB 0.792084 0.791136 0.793168 875.0  
GSVT 0.807524 0.810302 0.804848 691.0  
SB 0.855288 0.850019 0.860629 1553.0

SR 0.837883 0.846066 0.829949 907.0  
macro avg 0.823195 0.824381 0.822149 4026.0  
micro avg 0.829482 0.829482 0.829482 4026.0  
weighted avg 0.829432 0.829514 0.829482 4026.0  
The result of Model Number:Dataset Number:Featuregroup Number:Rescale of 77 : 1 :  
10 : 1

f1-score precision recall support  
AFIB 0.838291 0.857248 0.820180 875.0  
GSVT 0.888779 0.892562 0.885081 691.0  
SB 0.965030 0.960482 0.969627 1553.0  
SR 0.914353 0.900328 0.928860 907.0  
macro avg 0.901614 0.902655 0.900937 4026.0  
micro avg 0.913452 0.913452 0.913452 4026.0  
weighted avg 0.912981 0.912836 0.913452 4026.0

The result of Model Number:Dataset Number:Featuregroup Number:Rescale of 78 : 0 : 0 :  
0

f1-score precision recall support  
AFIB 0.713348 0.729091 0.698324 204.0  
GSVT 0.728938 0.716850 0.741528 300.0  
SB 0.742945 0.737134 0.748857 892.0  
SR 0.724915 0.733640 0.716396 681.0  
macro avg 0.727536 0.729179 0.726276 2077.0  
micro avg 0.732192 0.732192 0.732192 2077.0  
weighted avg 0.732103 0.732269 0.732192 2077.0

The result of Model Number:Dataset Number:Featuregroup Number:Rescale of 78 : 0 : 0 :  
1

f1-score precision recall support  
AFIB 0.793569 0.795583 0.791593 875.0  
GSVT 0.807572 0.798825 0.816548 691.0  
SB 0.851137 0.841509 0.861001 1553.0  
SR 0.812221 0.834458 0.791172 907.0  
macro avg 0.816125 0.817594 0.815079 4026.0  
micro avg 0.822555 0.822555 0.822555 4026.0  
weighted avg 0.822381 0.822613 0.822555 4026.0

The result of Model Number:Dataset Number:Featuregroup Number:Rescale of 78 : 0 : 1 :  
0

f1-score precision recall support  
AFIB 0.805438 0.825525 0.786366 875.0  
GSVT 0.856846 0.860130 0.853626 691.0  
SB 0.927892 0.923399 0.932431 1553.0  
SR 0.879229 0.864574 0.894446 907.0  
macro avg 0.867351 0.868407 0.866717 4026.0  
micro avg 0.878602 0.878602 0.878602 4026.0  
weighted avg 0.878121 0.878016 0.878602 4026.0

The result of Model Number:Dataset Number:Featuregroup Number:Rescale of 78 : 0 : 1 :  
1

|              | f1-score | precision | recall   | support |
|--------------|----------|-----------|----------|---------|
| AFIB         | 0.704987 | 0.763839  | 0.655960 | 204.0   |
| GSVT         | 0.756180 | 0.746671  | 0.766242 | 300.0   |
| SB           | 0.775484 | 0.764620  | 0.786752 | 892.0   |
| SR           | 0.754330 | 0.757864  | 0.751197 | 681.0   |
| macro avg    | 0.747745 | 0.758249  | 0.740038 | 2077.0  |
| micro avg    | 0.759286 | 0.759286  | 0.759286 | 2077.0  |
| weighted avg | 0.758836 | 0.759736  | 0.759286 | 2077.0  |

The result of Model Number:Dataset Number:Featuregroup Number:Rescale of 78 : 0 : 2 :  
0

|              | f1-score | precision | recall   | support |
|--------------|----------|-----------|----------|---------|
| AFIB         | 0.788833 | 0.789720  | 0.788091 | 204.0   |
| GSVT         | 0.806944 | 0.805142  | 0.808815 | 300.0   |
| SB           | 0.824048 | 0.822948  | 0.825155 | 892.0   |
| SR           | 0.817876 | 0.819936  | 0.815837 | 681.0   |
| macro avg    | 0.809425 | 0.809436  | 0.809474 | 2077.0  |
| micro avg    | 0.816099 | 0.816099  | 0.816099 | 2077.0  |
| weighted avg | 0.816095 | 0.816125  | 0.816099 | 2077.0  |

The result of Model Number:Dataset Number:Featuregroup Number:Rescale of 78 : 0 : 2 :  
1

|              | f1-score | precision | recall   | support |
|--------------|----------|-----------|----------|---------|
| AFIB         | 0.859881 | 0.852993  | 0.866981 | 875.0   |
| GSVT         | 0.883628 | 0.885136  | 0.882229 | 691.0   |
| SB           | 0.936786 | 0.934275  | 0.939318 | 1553.0  |
| SR           | 0.911190 | 0.921797  | 0.900844 | 907.0   |
| macro avg    | 0.897871 | 0.898550  | 0.897343 | 4026.0  |
| micro avg    | 0.905130 | 0.905130  | 0.905130 | 4026.0  |
| weighted avg | 0.905181 | 0.905364  | 0.905130 | 4026.0  |

The result of Model Number:Dataset Number:Featuregroup Number:Rescale of 78 : 0 : 3 :  
0

|              | f1-score | precision | recall   | support |
|--------------|----------|-----------|----------|---------|
| AFIB         | 0.862788 | 0.852722  | 0.875345 | 875.0   |
| GSVT         | 0.887757 | 0.876996  | 0.899500 | 691.0   |
| SB           | 0.901138 | 0.866354  | 0.952160 | 1553.0  |
| SR           | 0.715550 | 0.753295  | 0.681451 | 907.0   |
| macro avg    | 0.841808 | 0.837342  | 0.852114 | 4026.0  |
| micro avg    | 0.865440 | 0.865440  | 0.865440 | 4026.0  |
| weighted avg | 0.848696 | 0.839747  | 0.865440 | 4026.0  |

The result of Model Number:Dataset Number:Featuregroup Number:Rescale of 78 : 0 : 3 :  
1

|      | f1-score | precision | recall   | support |
|------|----------|-----------|----------|---------|
| AFIB | 0.662955 | 0.663546  | 0.662432 | 875.0   |

GSVT 0.675098 0.676869 0.673450 691.0  
SB 0.716626 0.711854 0.721469 1553.0  
SR 0.702663 0.709078 0.696388 907.0  
macro avg 0.689335 0.690337 0.688435 4026.0  
micro avg 0.694746 0.694746 0.694746 4026.0  
weighted avg 0.694688 0.694725 0.694746 4026.0  
The result of Model Number:Dataset Number:Featuregroup Number:Rescale of 78 : 0 : 4 :  
0

f1-score precision recall support

AFIB 0.781303 0.790439 0.772521 204.0  
GSVT 0.704739 0.677833 0.804097 300.0  
SB 0.653854 0.652313 0.655408 892.0  
SR 0.811866 0.813426 0.810317 681.0  
macro avg 0.737940 0.733503 0.760586 2077.0  
micro avg 0.739178 0.739178 0.739178 2077.0  
weighted avg 0.725530 0.722391 0.739178 2077.0

The result of Model Number:Dataset Number:Featuregroup Number:Rescale of 78 : 0 : 4 :  
1

f1-score precision recall support

AFIB 0.751764 0.753110 0.750446 875.0  
GSVT 0.719864 0.723646 0.716142 691.0  
SB 0.761442 0.719555 0.808513 1553.0  
SR 0.632381 0.711791 0.568967 907.0  
macro avg 0.716363 0.727026 0.711017 4026.0  
micro avg 0.726073 0.726073 0.726073 4026.0  
weighted avg 0.723127 0.725801 0.726073 4026.0

The result of Model Number:Dataset Number:Featuregroup Number:Rescale of 78 : 0 : 5 :  
0

f1-score precision recall support

AFIB 0.725690 0.739752 0.712478 204.0  
GSVT 0.753830 0.747527 0.760379 300.0  
SB 0.767896 0.766355 0.769445 892.0  
SR 0.760574 0.761362 0.759791 681.0  
macro avg 0.751997 0.753749 0.750523 2077.0  
micro avg 0.759375 0.759375 0.759375 2077.0  
weighted avg 0.759318 0.759385 0.759375 2077.0

The result of Model Number:Dataset Number:Featuregroup Number:Rescale of 78 : 0 : 5 :  
1

f1-score precision recall support

AFIB 0.741986 0.735109 0.749034 875.0  
GSVT 0.755311 0.759412 0.751266 691.0  
SB 0.800295 0.798450 0.802149 1553.0  
SR 0.781649 0.788862 0.774591 907.0  
macro avg 0.769810 0.770458 0.769260 4026.0

micro avg 0.775663 0.775663 0.775663 4026.0  
weighted avg 0.775700 0.775823 0.775663 4026.0  
The result of Model Number:Dataset Number:Featuregroup Number:Rescale of 78 : 0 : 6 :  
0

|              | f1-score | precision | recall   | support |
|--------------|----------|-----------|----------|---------|
| AFIB         | 0.855400 | 0.842284  | 0.869073 | 875.0   |
| GSVT         | 0.884895 | 0.893569  | 0.876563 | 691.0   |
| SB           | 0.941765 | 0.939565  | 0.944005 | 1553.0  |
| SR           | 0.918239 | 0.929882  | 0.906904 | 907.0   |
| macro avg    | 0.900075 | 0.901325  | 0.899136 | 4026.0  |
| micro avg    | 0.907786 | 0.907786  | 0.907786 | 4026.0  |
| weighted avg | 0.907934 | 0.908346  | 0.907786 | 4026.0  |

The result of Model Number:Dataset Number:Featuregroup Number:Rescale of 78 : 0 : 6 :  
1

|              | f1-score | precision | recall   | support |
|--------------|----------|-----------|----------|---------|
| AFIB         | 0.871928 | 0.879200  | 0.865075 | 204.0   |
| GSVT         | 0.894961 | 0.890840  | 0.899140 | 300.0   |
| SB           | 0.908458 | 0.905231  | 0.911714 | 892.0   |
| SR           | 0.900068 | 0.904099  | 0.896119 | 681.0   |
| macro avg    | 0.893854 | 0.894842  | 0.893012 | 2077.0  |
| micro avg    | 0.900204 | 0.900204  | 0.900204 | 2077.0  |
| weighted avg | 0.900170 | 0.900224  | 0.900204 | 2077.0  |

The result of Model Number:Dataset Number:Featuregroup Number:Rescale of 78 : 0 : 7 :  
0

|              | f1-score | precision | recall   | support |
|--------------|----------|-----------|----------|---------|
| AFIB         | 0.677712 | 0.675069  | 0.680424 | 875.0   |
| GSVT         | 0.690395 | 0.691851  | 0.688986 | 691.0   |
| SB           | 0.732878 | 0.731051  | 0.734718 | 1553.0  |
| SR           | 0.715972 | 0.720781  | 0.711242 | 907.0   |
| macro avg    | 0.704239 | 0.704688  | 0.703842 | 4026.0  |
| micro avg    | 0.709780 | 0.709780  | 0.709780 | 4026.0  |
| weighted avg | 0.709788 | 0.709842  | 0.709780 | 4026.0  |

The result of Model Number:Dataset Number:Featuregroup Number:Rescale of 78 : 0 : 7 :  
1

|              | f1-score | precision | recall   | support |
|--------------|----------|-----------|----------|---------|
| AFIB         | 0.744142 | 0.749008  | 0.739385 | 204.0   |
| GSVT         | 0.762786 | 0.761029  | 0.764561 | 300.0   |
| SB           | 0.776402 | 0.775282  | 0.777532 | 892.0   |
| SR           | 0.770283 | 0.771088  | 0.769494 | 681.0   |
| macro avg    | 0.763404 | 0.764102  | 0.762743 | 2077.0  |
| micro avg    | 0.769276 | 0.769276  | 0.769276 | 2077.0  |
| weighted avg | 0.769261 | 0.769268  | 0.769276 | 2077.0  |

The result of Model Number:Dataset Number:Featuregroup Number:Rescale of 78 : 0 : 8 :  
0



f1-score precision recall support  
AFIB 0.705259 0.707897 0.702941 875.0  
GSVT 0.721134 0.728091 0.714454 691.0  
SB 0.766791 0.758749 0.775065 1553.0  
SR 0.740238 0.746753 0.734091 907.0  
macro avg 0.733356 0.735373 0.731638 4026.0  
micro avg 0.739756 0.739756 0.739756 4026.0  
weighted avg 0.739600 0.739733 0.739756 4026.0  
The result of Model Number:Dataset Number:Featuregroup Number:Rescale of 78 : 0 : 8 :  
1

f1-score precision recall support  
AFIB 0.773864 0.759398 0.788975 875.0  
GSVT 0.800971 0.813616 0.788813 691.0  
SB 0.851799 0.850277 0.853334 1553.0  
SR 0.830148 0.838943 0.821540 907.0  
macro avg 0.814195 0.815558 0.813166 4026.0  
micro avg 0.821110 0.821110 0.821110 4026.0  
weighted avg 0.821259 0.821680 0.821110 4026.0  
The result of Model Number:Dataset Number:Featuregroup Number:Rescale of 78 : 0 : 9 :  
0

f1-score precision recall support  
AFIB 0.597132 0.609681 0.585113 875.0  
GSVT 0.635876 0.638060 0.633738 691.0  
SB 0.692796 0.689531 0.696095 1553.0  
SR 0.655809 0.647075 0.664836 907.0  
macro avg 0.645403 0.646087 0.644945 4026.0  
micro avg 0.654230 0.654230 0.654230 4026.0  
weighted avg 0.653902 0.653778 0.654230 4026.0  
The result of Model Number:Dataset Number:Featuregroup Number:Rescale of 78 : 0 : 9 :  
1

f1-score precision recall support  
AFIB 0.737757 0.746384 0.729465 204.0  
GSVT 0.665461 0.640054 0.759281 300.0  
SB 0.617411 0.615956 0.618879 892.0  
SR 0.766616 0.768090 0.765154 681.0  
macro avg 0.696811 0.692621 0.718195 2077.0  
micro avg 0.697980 0.697980 0.697980 2077.0  
weighted avg 0.685093 0.682129 0.697980 2077.0  
The result of Model Number:Dataset Number:Featuregroup Number:Rescale of 78 : 0 :  
10 : 0

f1-score precision recall support  
AFIB 0.878680 0.885057 0.872457 875.0  
GSVT 0.897954 0.889608 0.906526 691.0  
SB 0.965037 0.959211 0.970941 1553.0

SR 0.933409 0.943832 0.923218 907.0  
macro avg 0.918770 0.919427 0.918285 4026.0  
micro avg 0.927729 0.927729 0.927729 4026.0  
weighted avg 0.927630 0.927684 0.927729 4026.0  
The result of Model Number:Dataset Number:Featuregroup Number:Rescale of 78 : 0 :  
10 : 1

f1-score precision recall support  
AFIB 0.759674 0.748994 0.770701 875.0  
GSVT 0.776030 0.781853 0.770314 691.0  
SB 0.825219 0.822794 0.827662 1553.0  
SR 0.804892 0.816027 0.794070 907.0  
macro avg 0.791454 0.792417 0.790687 4026.0  
micro avg 0.797871 0.797871 0.797871 4026.0  
weighted avg 0.797952 0.798203 0.797871 4026.0  
The result of Model Number:Dataset Number:Featuregroup Number:Rescale of 78 : 1 : 0 :  
0

f1-score precision recall support  
AFIB 0.798002 0.816187 0.780736 875.0  
GSVT 0.849176 0.850854 0.847788 691.0  
SB 0.929055 0.923970 0.934199 1553.0  
SR 0.878096 0.867445 0.889135 907.0  
macro avg 0.863582 0.864614 0.862965 4026.0  
micro avg 0.875862 0.875862 0.875862 4026.0  
weighted avg 0.875382 0.875261 0.875862 4026.0  
The result of Model Number:Dataset Number:Featuregroup Number:Rescale of 78 : 1 : 0 :  
1

f1-score precision recall support  
AFIB 0.919865 0.936747 0.904024 204.0  
GSVT 0.954784 0.947107 0.962762 300.0  
SB 0.972496 0.970760 0.974240 892.0  
SR 0.962867 0.963724 0.962016 681.0  
macro avg 0.952503 0.954585 0.950761 2077.0  
micro avg 0.961678 0.961678 0.961678 2077.0  
weighted avg 0.961611 0.961696 0.961678 2077.0  
The result of Model Number:Dataset Number:Featuregroup Number:Rescale of 78 : 1 : 1 :  
0

f1-score precision recall support  
AFIB 0.851352 0.864259 0.838846 204.0  
GSVT 0.865041 0.857749 0.872504 300.0  
SB 0.884229 0.881377 0.887103 892.0  
SR 0.874737 0.877987 0.871536 681.0  
macro avg 0.868840 0.870343 0.867497 2077.0  
micro avg 0.875150 0.875150 0.875150 2077.0  
weighted avg 0.875116 0.875171 0.875150 2077.0

The result of Model Number:Dataset Number:Featuregroup Number:Rescale of 78 : 1 : 1 : 1

|              | f1-score | precision | recall   | support |
|--------------|----------|-----------|----------|---------|
| AFIB         | 0.772672 | 0.780147  | 0.765480 | 204.0   |
| GSVT         | 0.800014 | 0.798437  | 0.801610 | 300.0   |
| SB           | 0.816736 | 0.815289  | 0.818198 | 892.0   |
| SR           | 0.809206 | 0.809598  | 0.808849 | 681.0   |
| macro avg    | 0.799657 | 0.800867  | 0.798534 | 2077.0  |
| micro avg    | 0.807559 | 0.807559  | 0.807559 | 2077.0  |
| weighted avg | 0.807524 | 0.807537  | 0.807559 | 2077.0  |

The result of Model Number:Dataset Number:Featuregroup Number:Rescale of 78 : 1 : 2 : 0

|              | f1-score | precision | recall   | support |
|--------------|----------|-----------|----------|---------|
| AFIB         | 0.760388 | 0.754572  | 0.766395 | 875.0   |
| GSVT         | 0.777884 | 0.782137  | 0.773722 | 691.0   |
| SB           | 0.823716 | 0.823139  | 0.824300 | 1553.0  |
| SR           | 0.801837 | 0.805726  | 0.798026 | 907.0   |
| macro avg    | 0.790956 | 0.791393  | 0.790611 | 4026.0  |
| micro avg    | 0.797115 | 0.797115  | 0.797115 | 4026.0  |
| weighted avg | 0.797157 | 0.797277  | 0.797115 | 4026.0  |

The result of Model Number:Dataset Number:Featuregroup Number:Rescale of 78 : 1 : 2 : 1

|              | f1-score | precision | recall   | support |
|--------------|----------|-----------|----------|---------|
| AFIB         | 0.819802 | 0.825325  | 0.814473 | 875.0   |
| GSVT         | 0.834432 | 0.822842  | 0.846507 | 691.0   |
| SB           | 0.889178 | 0.883090  | 0.895359 | 1553.0  |
| SR           | 0.853145 | 0.867882  | 0.838947 | 907.0   |
| macro avg    | 0.849139 | 0.849785  | 0.848821 | 4026.0  |
| micro avg    | 0.856686 | 0.856686  | 0.856686 | 4026.0  |
| weighted avg | 0.856586 | 0.856769  | 0.856686 | 4026.0  |

The result of Model Number:Dataset Number:Featuregroup Number:Rescale of 78 : 1 : 3 : 0

|              | f1-score | precision | recall   | support |
|--------------|----------|-----------|----------|---------|
| AFIB         | 0.761532 | 0.762211  | 0.760932 | 875.0   |
| GSVT         | 0.775481 | 0.777515  | 0.773587 | 691.0   |
| SB           | 0.823184 | 0.817703  | 0.828747 | 1553.0  |
| SR           | 0.807144 | 0.814514  | 0.799937 | 907.0   |
| macro avg    | 0.791835 | 0.792986  | 0.790801 | 4026.0  |
| micro avg    | 0.798050 | 0.798050  | 0.798050 | 4026.0  |
| weighted avg | 0.797983 | 0.798026  | 0.798050 | 4026.0  |

The result of Model Number:Dataset Number:Featuregroup Number:Rescale of 78 : 1 : 3 : 1

|      | f1-score | precision | recall   | support |
|------|----------|-----------|----------|---------|
| AFIB | 0.766179 | 0.776019  | 0.756623 | 875.0   |

GSVT 0.774655 0.768390 0.781146 691.0  
SB 0.828659 0.826168 0.831168 1553.0  
SR 0.808140 0.807800 0.808490 907.0  
macro avg 0.794408 0.794594 0.794357 4026.0  
micro avg 0.801272 0.801272 0.801272 4026.0  
weighted avg 0.801188 0.801214 0.801272 4026.0  
The result of Model Number:Dataset Number:Featuregroup Number:Rescale of 78 : 1 : 4 :  
0

f1-score precision recall support  
AFIB 0.793837 0.797600 0.790114 875.0  
GSVT 0.803684 0.799892 0.807530 691.0  
SB 0.847699 0.845910 0.849501 1553.0  
SR 0.831635 0.833964 0.829339 907.0  
macro avg 0.819214 0.819341 0.819121 4026.0  
micro avg 0.824848 0.824848 0.824848 4026.0  
weighted avg 0.824819 0.824821 0.824848 4026.0  
The result of Model Number:Dataset Number:Featuregroup Number:Rescale of 78 : 1 : 4 :  
1

f1-score precision recall support  
AFIB 0.747353 0.754247 0.740766 204.0  
GSVT 0.774676 0.774704 0.774669 300.0  
SB 0.790900 0.789495 0.792317 892.0  
SR 0.782506 0.782297 0.782735 681.0  
macro avg 0.773859 0.775186 0.772622 2077.0  
micro avg 0.781563 0.781563 0.781563 2077.0  
weighted avg 0.781528 0.781537 0.781563 2077.0  
The result of Model Number:Dataset Number:Featuregroup Number:Rescale of 78 : 1 : 5 :  
0

f1-score precision recall support  
AFIB 0.853611 0.853387 0.853916 875.0  
GSVT 0.871442 0.868147 0.874856 691.0  
SB 0.927782 0.923593 0.932023 1553.0  
SR 0.896514 0.906757 0.886534 907.0  
macro avg 0.887337 0.887971 0.886832 4026.0  
micro avg 0.894988 0.894988 0.894988 4026.0  
weighted avg 0.894948 0.895025 0.894988 4026.0  
The result of Model Number:Dataset Number:Featuregroup Number:Rescale of 78 : 1 : 5 :  
1

f1-score precision recall support  
AFIB 0.730844 0.744848 0.717544 204.0  
GSVT 0.754085 0.750201 0.758080 300.0  
SB 0.772734 0.771531 0.773947 892.0  
SR 0.765120 0.764360 0.765906 681.0  
macro avg 0.755696 0.757735 0.753869 2077.0

micro avg 0.763479 0.763479 0.763479 2077.0  
weighted avg 0.763430 0.763478 0.763479 2077.0  
The result of Model Number:Dataset Number:Featuregroup Number:Rescale of 78 : 1 : 6 :  
0

|              | f1-score | precision | recall   | support |
|--------------|----------|-----------|----------|---------|
| AFIB         | 0.883757 | 0.881525  | 0.886139 | 875.0   |
| GSVT         | 0.900999 | 0.896045  | 0.906056 | 691.0   |
| SB           | 0.943417 | 0.937729  | 0.949187 | 1553.0  |
| SR           | 0.915601 | 0.932126  | 0.899668 | 907.0   |
| macro avg    | 0.910943 | 0.911856  | 0.910263 | 4026.0  |
| micro avg    | 0.916926 | 0.916926  | 0.916926 | 4026.0  |
| weighted avg | 0.916904 | 0.917097  | 0.916926 | 4026.0  |

The result of Model Number:Dataset Number:Featuregroup Number:Rescale of 78 : 1 : 6 :  
1

|              | f1-score | precision | recall   | support |
|--------------|----------|-----------|----------|---------|
| AFIB         | 0.705951 | 0.716213  | 0.696299 | 204.0   |
| GSVT         | 0.721520 | 0.711759  | 0.731611 | 300.0   |
| SB           | 0.732379 | 0.724747  | 0.740180 | 892.0   |
| SR           | 0.717864 | 0.729743  | 0.706377 | 681.0   |
| macro avg    | 0.719429 | 0.720615  | 0.718617 | 2077.0  |
| micro avg    | 0.723549 | 0.723549  | 0.723549 | 2077.0  |
| weighted avg | 0.723456 | 0.723671  | 0.723549 | 2077.0  |

The result of Model Number:Dataset Number:Featuregroup Number:Rescale of 78 : 1 : 7 :  
0

|              | f1-score | precision | recall   | support |
|--------------|----------|-----------|----------|---------|
| AFIB         | 0.773877 | 0.779494  | 0.768396 | 875.0   |
| GSVT         | 0.790852 | 0.783502  | 0.798402 | 691.0   |
| SB           | 0.849934 | 0.844803  | 0.855133 | 1553.0  |
| SR           | 0.822079 | 0.831258  | 0.813103 | 907.0   |
| macro avg    | 0.809186 | 0.809764  | 0.808759 | 4026.0  |
| micro avg    | 0.817076 | 0.817076  | 0.817076 | 4026.0  |
| weighted avg | 0.816988 | 0.817036  | 0.817076 | 4026.0  |

The result of Model Number:Dataset Number:Featuregroup Number:Rescale of 78 : 1 : 7 :  
1

|              | f1-score | precision | recall   | support |
|--------------|----------|-----------|----------|---------|
| AFIB         | 0.719258 | 0.732476  | 0.706597 | 204.0   |
| GSVT         | 0.731340 | 0.726550  | 0.736212 | 300.0   |
| SB           | 0.743850 | 0.740218  | 0.747519 | 892.0   |
| SR           | 0.736161 | 0.739222  | 0.733136 | 681.0   |
| macro avg    | 0.732652 | 0.734617  | 0.730866 | 2077.0  |
| micro avg    | 0.737151 | 0.737151  | 0.737151 | 2077.0  |
| weighted avg | 0.737107 | 0.737157  | 0.737151 | 2077.0  |

The result of Model Number:Dataset Number:Featuregroup Number:Rescale of 78 : 1 : 8 :  
0

f1-score precision recall support  
AFIB 0.560530 0.619159 0.512208 204.0  
GSVT 0.659425 0.650718 0.668438 300.0  
SB 0.699317 0.696600 0.702061 892.0  
SR 0.682513 0.672786 0.692533 681.0  
macro avg 0.650446 0.659816 0.643810 2077.0  
micro avg 0.675433 0.675433 0.675433 2077.0  
weighted avg 0.674414 0.674558 0.675433 2077.0  
The result of Model Number:Dataset Number:Featuregroup Number:Rescale of 78 : 1 : 8 :  
1

f1-score precision recall support  
AFIB 0.860480 0.857993 0.863061 875.0  
GSVT 0.876428 0.875715 0.877203 691.0  
SB 0.930894 0.927038 0.934789 1553.0  
SR 0.902947 0.912867 0.893290 907.0  
macro avg 0.892687 0.893403 0.892086 4026.0  
micro avg 0.899967 0.899967 0.899967 4026.0  
weighted avg 0.899946 0.900031 0.899967 4026.0  
The result of Model Number:Dataset Number:Featuregroup Number:Rescale of 78 : 1 : 9 :  
0

f1-score precision recall support  
AFIB 0.527557 0.574691 0.557112 204.0  
GSVT 0.716569 0.704855 0.728925 300.0  
SB 0.610021 0.605375 0.614785 892.0  
SR 0.745956 0.737516 0.754614 681.0  
macro avg 0.650026 0.655609 0.663859 2077.0  
micro avg 0.671453 0.671453 0.671453 2077.0  
weighted avg 0.661881 0.660056 0.671453 2077.0  
The result of Model Number:Dataset Number:Featuregroup Number:Rescale of 78 : 1 : 9 :  
1

f1-score precision recall support  
AFIB 0.864732 0.887582 0.843113 204.0  
GSVT 0.888446 0.881066 0.896114 300.0  
SB 0.912928 0.909578 0.916305 892.0  
SR 0.898793 0.899882 0.897730 681.0  
macro avg 0.891225 0.894527 0.888316 2077.0  
micro avg 0.900110 0.900110 0.900110 2077.0  
weighted avg 0.900024 0.900120 0.900110 2077.0  
The result of Model Number:Dataset Number:Featuregroup Number:Rescale of 78 : 1 :  
10 : 0

f1-score precision recall support  
AFIB 0.880240 0.880010 0.880556 875.0  
GSVT 0.898628 0.895231 0.902148 691.0  
SB 0.956725 0.952406 0.961099 1553.0

SR 0.924482 0.935044 0.914191 907.0  
macro avg 0.915019 0.915673 0.914499 4026.0  
micro avg 0.922908 0.922908 0.922908 4026.0  
weighted avg 0.922867 0.922947 0.922908 4026.0  
The result of Model Number:Dataset Number:Featuregroup Number:Rescale of 78 : 1 : 10 : 1

f1-score precision recall support  
AFIB 0.763102 0.778410 0.748536 204.0  
GSVT 0.780787 0.772671 0.789117 300.0  
SB 0.795227 0.792134 0.798347 892.0  
SR 0.786871 0.790154 0.783633 681.0  
macro avg 0.781497 0.783342 0.779908 2077.0  
micro avg 0.787297 0.787297 0.787297 2077.0  
weighted avg 0.787246 0.787326 0.787297 2077.0

The result of Model Number:Dataset Number:Featuregroup Number:Rescale of 79 : 0 : 0 : 0

f1-score precision recall support  
AFIB 0.798385 0.800411 0.796397 875.0  
GSVT 0.812473 0.803672 0.821503 691.0  
SB 0.856302 0.846616 0.866226 1553.0  
SR 0.817150 0.839522 0.795974 907.0  
macro avg 0.821078 0.822555 0.820025 4026.0  
micro avg 0.827547 0.827547 0.827547 4026.0  
weighted avg 0.827372 0.827605 0.827547 4026.0

The result of Model Number:Dataset Number:Featuregroup Number:Rescale of 79 : 0 : 0 : 1

f1-score precision recall support  
AFIB 0.651577 0.710589 0.602700 204.0  
GSVT 0.756274 0.747632 0.765350 300.0  
SB 0.801983 0.799930 0.804051 892.0  
SR 0.782348 0.771753 0.793259 681.0  
macro avg 0.748045 0.757476 0.741340 2077.0  
micro avg 0.775146 0.775146 0.775146 2077.0  
weighted avg 0.774170 0.774363 0.775146 2077.0

The result of Model Number:Dataset Number:Featuregroup Number:Rescale of 79 : 0 : 1 : 0

f1-score precision recall support  
AFIB 0.775024 0.775575 0.774489 875.0  
GSVT 0.785468 0.787017 0.783992 691.0  
SB 0.834299 0.831526 0.837092 1553.0  
SR 0.814695 0.817723 0.811716 907.0  
macro avg 0.802371 0.802960 0.801822 4026.0  
micro avg 0.808656 0.808656 0.808656 4026.0  
weighted avg 0.808619 0.808617 0.808656 4026.0

The result of Model Number:Dataset Number:Featuregroup Number:Rescale of 79 : 0 : 1 :  
1

|              | f1-score | precision | recall   | support |
|--------------|----------|-----------|----------|---------|
| AFIB         | 0.712198 | 0.724564  | 0.700338 | 204.0   |
| GSVT         | 0.726232 | 0.724083  | 0.728410 | 300.0   |
| SB           | 0.734796 | 0.732182  | 0.737432 | 892.0   |
| SR           | 0.728822 | 0.729583  | 0.728079 | 681.0   |
| macro avg    | 0.725512 | 0.727603  | 0.723565 | 2077.0  |
| micro avg    | 0.729419 | 0.729419  | 0.729419 | 2077.0  |
| weighted avg | 0.729381 | 0.729412  | 0.729419 | 2077.0  |

The result of Model Number:Dataset Number:Featuregroup Number:Rescale of 79 : 0 : 2 :  
0

|              | f1-score | precision | recall   | support |
|--------------|----------|-----------|----------|---------|
| AFIB         | 0.897317 | 0.916820  | 0.878873 | 204.0   |
| GSVT         | 0.934358 | 0.928846  | 0.939961 | 300.0   |
| SB           | 0.954432 | 0.952315  | 0.956569 | 892.0   |
| SR           | 0.944864 | 0.944331  | 0.945421 | 681.0   |
| macro avg    | 0.932743 | 0.935578  | 0.930206 | 2077.0  |
| micro avg    | 0.942884 | 0.942884  | 0.942884 | 2077.0  |
| weighted avg | 0.942786 | 0.942821  | 0.942884 | 2077.0  |

The result of Model Number:Dataset Number:Featuregroup Number:Rescale of 79 : 0 : 2 :  
1

|              | f1-score | precision | recall   | support |
|--------------|----------|-----------|----------|---------|
| AFIB         | 0.801596 | 0.829424  | 0.775682 | 204.0   |
| GSVT         | 0.816966 | 0.808022  | 0.826210 | 300.0   |
| SB           | 0.838714 | 0.832692  | 0.844826 | 892.0   |
| SR           | 0.823735 | 0.827786  | 0.819739 | 681.0   |
| macro avg    | 0.820253 | 0.824481  | 0.816614 | 2077.0  |
| micro avg    | 0.827120 | 0.827120  | 0.827120 | 2077.0  |
| weighted avg | 0.827016 | 0.827199  | 0.827120 | 2077.0  |

The result of Model Number:Dataset Number:Featuregroup Number:Rescale of 79 : 0 : 3 :  
0

|              | f1-score | precision | recall   | support |
|--------------|----------|-----------|----------|---------|
| AFIB         | 0.889349 | 0.912632  | 0.867630 | 204.0   |
| GSVT         | 0.836816 | 0.861137  | 0.814287 | 300.0   |
| SB           | 0.883020 | 0.851931  | 0.916480 | 892.0   |
| SR           | 0.800350 | 0.826414  | 0.776040 | 681.0   |
| macro avg    | 0.852384 | 0.863028  | 0.843609 | 2077.0  |
| micro avg    | 0.850874 | 0.850874  | 0.850874 | 2077.0  |
| weighted avg | 0.849862 | 0.850856  | 0.850874 | 2077.0  |

The result of Model Number:Dataset Number:Featuregroup Number:Rescale of 79 : 0 : 3 :  
1

|      | f1-score | precision | recall   | support |
|------|----------|-----------|----------|---------|
| AFIB | 0.873633 | 0.883341  | 0.864585 | 204.0   |



GSVT 0.900695 0.895567 0.906143 300.0  
SB 0.918613 0.917382 0.919848 892.0  
SR 0.910798 0.912018 0.909593 681.0  
macro avg 0.900935 0.902077 0.900042 2077.0  
micro avg 0.909078 0.909078 0.909078 2077.0  
weighted avg 0.909045 0.909129 0.909078 2077.0  
The result of Model Number:Dataset Number:Featuregroup Number:Rescale of 79 : 0 : 4 :  
0

f1-score precision recall support  
AFIB 0.624817 0.640400 0.610022 875.0  
GSVT 0.664696 0.667244 0.662198 691.0  
SB 0.719810 0.716325 0.723331 1553.0  
SR 0.682060 0.670691 0.693864 907.0  
macro avg 0.672846 0.673665 0.672354 4026.0  
micro avg 0.681574 0.681574 0.681574 4026.0  
weighted avg 0.681200 0.681119 0.681574 4026.0  
The result of Model Number:Dataset Number:Featuregroup Number:Rescale of 79 : 0 : 4 :  
1

f1-score precision recall support  
AFIB 0.795242 0.792943 0.797627 875.0  
GSVT 0.809981 0.809323 0.810698 691.0  
SB 0.860318 0.856754 0.863918 1553.0  
SR 0.834490 0.843658 0.825565 907.0  
macro avg 0.825008 0.825669 0.824452 4026.0  
micro avg 0.831736 0.831736 0.831736 4026.0  
weighted avg 0.831716 0.831794 0.831736 4026.0  
The result of Model Number:Dataset Number:Featuregroup Number:Rescale of 79 : 0 : 5 :  
0

f1-score precision recall support  
AFIB 0.728006 0.719512 0.738601 875.0  
GSVT 0.749074 0.739994 0.758983 691.0  
SB 0.760365 0.731015 0.803416 1553.0  
SR 0.603769 0.635617 0.574996 907.0  
macro avg 0.710304 0.706535 0.718999 4026.0  
micro avg 0.730243 0.730243 0.730243 4026.0  
weighted avg 0.716115 0.708564 0.730243 4026.0  
The result of Model Number:Dataset Number:Featuregroup Number:Rescale of 79 : 0 : 5 :  
1

f1-score precision recall support  
AFIB 0.744337 0.732663 0.756469 875.0  
GSVT 0.717217 0.737779 0.697854 691.0  
SB 0.753676 0.715472 0.796234 1553.0  
SR 0.612358 0.681430 0.556095 907.0  
macro avg 0.706897 0.716836 0.701663 4026.0

micro avg 0.716607 0.716607 0.716607 4026.0  
weighted avg 0.713552 0.715367 0.716607 4026.0  
The result of Model Number:Dataset Number:Featuregroup Number:Rescale of 79 : 0 : 6 :  
0

|              | f1-score | precision | recall   | support |
|--------------|----------|-----------|----------|---------|
| AFIB         | 0.837965 | 0.858863  | 0.818123 | 875.0   |
| GSVT         | 0.891448 | 0.894866  | 0.888098 | 691.0   |
| SB           | 0.965364 | 0.960690  | 0.970086 | 1553.0  |
| SR           | 0.914735 | 0.899489  | 0.930567 | 907.0   |
| macro avg    | 0.902378 | 0.903477  | 0.901719 | 4026.0  |
| micro avg    | 0.914084 | 0.914084  | 0.914084 | 4026.0  |
| weighted avg | 0.913583 | 0.913474  | 0.914084 | 4026.0  |

The result of Model Number:Dataset Number:Featuregroup Number:Rescale of 79 : 0 : 6 :  
1

|              | f1-score | precision | recall   | support |
|--------------|----------|-----------|----------|---------|
| AFIB         | 0.690088 | 0.721250  | 0.661733 | 204.0   |
| GSVT         | 0.714090 | 0.706071  | 0.722425 | 300.0   |
| SB           | 0.686928 | 0.656980  | 0.735023 | 892.0   |
| SR           | 0.572306 | 0.577185  | 0.567605 | 681.0   |
| macro avg    | 0.665853 | 0.665371  | 0.671697 | 2077.0  |
| micro avg    | 0.671113 | 0.671113  | 0.671113 | 2077.0  |
| weighted avg | 0.653580 | 0.644220  | 0.671113 | 2077.0  |

The result of Model Number:Dataset Number:Featuregroup Number:Rescale of 79 : 0 : 7 :  
0

|              | f1-score | precision | recall   | support |
|--------------|----------|-----------|----------|---------|
| AFIB         | 0.853665 | 0.844134  | 0.863424 | 875.0   |
| GSVT         | 0.870649 | 0.878624  | 0.862832 | 691.0   |
| SB           | 0.928588 | 0.925564  | 0.931635 | 1553.0  |
| SR           | 0.904515 | 0.913576  | 0.895635 | 907.0   |
| macro avg    | 0.889354 | 0.890474  | 0.888381 | 4026.0  |
| micro avg    | 0.896891 | 0.896891  | 0.896891 | 4026.0  |
| weighted avg | 0.896937 | 0.897109  | 0.896891 | 4026.0  |

The result of Model Number:Dataset Number:Featuregroup Number:Rescale of 79 : 0 : 7 :  
1

|              | f1-score | precision | recall   | support |
|--------------|----------|-----------|----------|---------|
| AFIB         | 0.802082 | 0.805884  | 0.798320 | 875.0   |
| GSVT         | 0.812032 | 0.808201  | 0.815918 | 691.0   |
| SB           | 0.856504 | 0.854696  | 0.858324 | 1553.0  |
| SR           | 0.840273 | 0.842626  | 0.837953 | 907.0   |
| macro avg    | 0.827723 | 0.827852  | 0.827629 | 4026.0  |
| micro avg    | 0.833415 | 0.833415  | 0.833415 | 4026.0  |
| weighted avg | 0.833386 | 0.833388  | 0.833415 | 4026.0  |

The result of Model Number:Dataset Number:Featuregroup Number:Rescale of 79 : 0 : 8 :  
0

f1-score precision recall support  
AFIB 0.778284 0.795884 0.761469 875.0  
GSVT 0.825158 0.828670 0.821725 691.0  
SB 0.895950 0.891728 0.900218 1553.0  
SR 0.848901 0.835879 0.862370 907.0  
macro avg 0.837073 0.838040 0.836445 4026.0  
micro avg 0.848064 0.848064 0.848064 4026.0  
weighted avg 0.847627 0.847493 0.848064 4026.0  
The result of Model Number:Dataset Number:Featuregroup Number:Rescale of 79 : 0 : 8 :  
1

f1-score precision recall support  
AFIB 0.772261 0.783652 0.761279 204.0  
GSVT 0.791219 0.788113 0.794374 300.0  
SB 0.808791 0.807169 0.810423 892.0  
SR 0.803054 0.803175 0.802941 681.0  
macro avg 0.793831 0.795527 0.792254 2077.0  
micro avg 0.800825 0.800825 0.800825 2077.0  
weighted avg 0.800784 0.800797 0.800825 2077.0  
The result of Model Number:Dataset Number:Featuregroup Number:Rescale of 79 : 0 : 9 :  
0

f1-score precision recall support  
AFIB 0.668371 0.675643 0.661448 204.0  
GSVT 0.690989 0.688108 0.694007 300.0  
SB 0.705149 0.704518 0.705781 892.0  
SR 0.698485 0.698491 0.698485 681.0  
macro avg 0.690748 0.691690 0.689930 2077.0  
micro avg 0.697334 0.697334 0.697334 2077.0  
weighted avg 0.697306 0.697336 0.697334 2077.0  
The result of Model Number:Dataset Number:Featuregroup Number:Rescale of 79 : 0 : 9 :  
1

f1-score precision recall support  
AFIB 0.735960 0.737279 0.734670 875.0  
GSVT 0.704731 0.708433 0.701088 691.0  
SB 0.745435 0.704429 0.791517 1553.0  
SR 0.619087 0.696828 0.557006 907.0  
macro avg 0.701303 0.711742 0.696070 4026.0  
micro avg 0.710809 0.710809 0.710809 4026.0  
weighted avg 0.707925 0.710543 0.710809 4026.0  
The result of Model Number:Dataset Number:Featuregroup Number:Rescale of 79 : 0 :  
10 : 0

f1-score precision recall support  
AFIB 0.843845 0.852065 0.835988 204.0  
GSVT 0.863359 0.859395 0.867389 300.0  
SB 0.875290 0.872279 0.878329 892.0

SR 0.867898 0.871265 0.864598 681.0  
macro avg 0.862598 0.863751 0.861576 2077.0  
micro avg 0.868088 0.868088 0.868088 2077.0  
weighted avg 0.868055 0.868100 0.868088 2077.0  
The result of Model Number:Dataset Number:Featuregroup Number:Rescale of 79 : 0 :  
10 : 1

f1-score precision recall support  
AFIB 0.671552 0.700638 0.644977 204.0  
GSVT 0.627785 0.633644 0.622349 300.0  
SB 0.650745 0.618751 0.686273 892.0  
SR 0.579990 0.616592 0.547677 681.0  
macro avg 0.632518 0.642406 0.625319 2077.0  
micro avg 0.627542 0.627542 0.627542 2077.0  
weighted avg 0.626273 0.628237 0.627542 2077.0

The result of Model Number:Dataset Number:Featuregroup Number:Rescale of 79 : 1 : 0 :  
0

f1-score precision recall support  
AFIB 0.740187 0.725442 0.755582 875.0  
GSVT 0.602447 0.560243 0.755149 691.0  
SB 0.488819 0.489661 0.487980 1553.0  
SR 0.792438 0.799416 0.785614 907.0  
macro avg 0.655973 0.643690 0.696081 4026.0  
micro avg 0.659048 0.659048 0.659048 4026.0  
weighted avg 0.631354 0.622803 0.659048 4026.0

The result of Model Number:Dataset Number:Featuregroup Number:Rescale of 79 : 1 : 0 :  
1

f1-score precision recall support  
AFIB 0.808187 0.816033 0.800991 204.0  
GSVT 0.832413 0.828478 0.836605 300.0  
SB 0.849269 0.848322 0.850221 892.0  
SR 0.841797 0.842669 0.840931 681.0  
macro avg 0.832916 0.833875 0.832187 2077.0  
micro avg 0.840373 0.840373 0.840373 2077.0  
weighted avg 0.840349 0.840431 0.840373 2077.0

The result of Model Number:Dataset Number:Featuregroup Number:Rescale of 79 : 1 : 1 :  
0

f1-score precision recall support  
AFIB 0.816149 0.784948 0.867487 875.0  
GSVT 0.845668 0.816482 0.885256 691.0  
SB 0.942232 0.925600 0.960507 1553.0  
SR 0.798049 0.959608 0.689007 907.0  
macro avg 0.850524 0.871659 0.850564 4026.0  
micro avg 0.866210 0.866210 0.866210 4026.0  
weighted avg 0.865773 0.883964 0.866210 4026.0

The result of Model Number:Dataset Number:Featuregroup Number:Rescale of 79 : 1 : 1 : 1

|              | f1-score | precision | recall   | support |
|--------------|----------|-----------|----------|---------|
| AFIB         | 0.765324 | 0.776927  | 0.754082 | 204.0   |
| GSVT         | 0.777630 | 0.771075  | 0.784339 | 300.0   |
| SB           | 0.794879 | 0.792315  | 0.797462 | 892.0   |
| SR           | 0.786346 | 0.789267  | 0.783469 | 681.0   |
| macro avg    | 0.781045 | 0.782396  | 0.779838 | 2077.0  |
| micro avg    | 0.786718 | 0.786718  | 0.786718 | 2077.0  |
| weighted avg | 0.786687 | 0.786736  | 0.786718 | 2077.0  |

The result of Model Number:Dataset Number:Featuregroup Number:Rescale of 79 : 1 : 2 : 0

|              | f1-score | precision | recall   | support |
|--------------|----------|-----------|----------|---------|
| AFIB         | 0.797942 | 0.807068  | 0.789328 | 204.0   |
| GSVT         | 0.816619 | 0.811787  | 0.821523 | 300.0   |
| SB           | 0.783939 | 0.754982  | 0.832819 | 892.0   |
| SR           | 0.657601 | 0.660784  | 0.654466 | 681.0   |
| macro avg    | 0.764025 | 0.758655  | 0.774534 | 2077.0  |
| micro avg    | 0.768438 | 0.768438  | 0.768438 | 2077.0  |
| weighted avg | 0.748612 | 0.737417  | 0.768438 | 2077.0  |

The result of Model Number:Dataset Number:Featuregroup Number:Rescale of 79 : 1 : 2 : 1

|              | f1-score | precision | recall   | support |
|--------------|----------|-----------|----------|---------|
| AFIB         | 0.694961 | 0.701296  | 0.688830 | 204.0   |
| GSVT         | 0.713097 | 0.710762  | 0.715469 | 300.0   |
| SB           | 0.726133 | 0.725649  | 0.726620 | 892.0   |
| SR           | 0.719746 | 0.719540  | 0.719964 | 681.0   |
| macro avg    | 0.713484 | 0.714311  | 0.712721 | 2077.0  |
| micro avg    | 0.719115 | 0.719115  | 0.719115 | 2077.0  |
| weighted avg | 0.719094 | 0.719103  | 0.719115 | 2077.0  |

The result of Model Number:Dataset Number:Featuregroup Number:Rescale of 79 : 1 : 3 : 0

|              | f1-score | precision | recall   | support |
|--------------|----------|-----------|----------|---------|
| AFIB         | 0.900456 | 0.946976  | 0.858560 | 204.0   |
| GSVT         | 0.944205 | 0.934976  | 0.953639 | 300.0   |
| SB           | 0.960853 | 0.953124  | 0.968715 | 892.0   |
| SR           | 0.948985 | 0.950140  | 0.947871 | 681.0   |
| macro avg    | 0.938625 | 0.946304  | 0.932196 | 2077.0  |
| micro avg    | 0.948884 | 0.948884  | 0.948884 | 2077.0  |
| weighted avg | 0.948625 | 0.948920  | 0.948884 | 2077.0  |

The result of Model Number:Dataset Number:Featuregroup Number:Rescale of 79 : 1 : 3 : 1

|      | f1-score | precision | recall   | support |
|------|----------|-----------|----------|---------|
| AFIB | 0.694195 | 0.715576  | 0.674193 | 204.0   |

GSVT 0.711904 0.703190 0.720916 300.0  
SB 0.731241 0.726896 0.735662 892.0  
SR 0.718915 0.722461 0.715432 681.0  
macro avg 0.714064 0.717031 0.711551 2077.0  
micro avg 0.720862 0.720862 0.720862 2077.0  
weighted avg 0.720768 0.720906 0.720862 2077.0  
The result of Model Number:Dataset Number:Featuregroup Number:Rescale of 79 : 1 : 4 :  
0

f1-score precision recall support  
AFIB 0.662411 0.665456 0.659426 875.0  
GSVT 0.634877 0.638702 0.631119 691.0  
SB 0.681009 0.650654 0.714370 1553.0  
SR 0.582412 0.634032 0.538682 907.0  
macro avg 0.640177 0.647211 0.635899 4026.0  
micro avg 0.648560 0.648560 0.648560 4026.0  
weighted avg 0.646837 0.648075 0.648560 4026.0  
The result of Model Number:Dataset Number:Featuregroup Number:Rescale of 79 : 1 : 4 :  
1

f1-score precision recall support  
AFIB 0.917550 0.922783 0.912528 204.0  
GSVT 0.936429 0.929675 0.943292 300.0  
SB 0.955342 0.951852 0.958874 892.0  
SR 0.945181 0.951387 0.939080 681.0  
macro avg 0.938626 0.938924 0.938443 2077.0  
micro avg 0.945581 0.945581 0.945581 2077.0  
weighted avg 0.945567 0.945641 0.945581 2077.0  
The result of Model Number:Dataset Number:Featuregroup Number:Rescale of 79 : 1 : 5 :  
0

f1-score precision recall support  
AFIB 0.832634 0.830227 0.835132 875.0  
GSVT 0.848066 0.847377 0.848816 691.0  
SB 0.900770 0.897039 0.904539 1553.0  
SR 0.873727 0.883326 0.864382 907.0  
macro avg 0.863799 0.864492 0.863217 4026.0  
micro avg 0.870843 0.870843 0.870843 4026.0  
weighted avg 0.870823 0.870905 0.870843 4026.0  
The result of Model Number:Dataset Number:Featuregroup Number:Rescale of 79 : 1 : 5 :  
1

f1-score precision recall support  
AFIB 0.722890 0.745236 0.702476 204.0  
GSVT 0.674809 0.689479 0.661248 300.0  
SB 0.711753 0.680164 0.746454 892.0  
SR 0.640855 0.673786 0.611084 681.0  
macro avg 0.687577 0.697166 0.680316 2077.0

micro avg 0.685443 0.685443 0.685443 2077.0  
weighted avg 0.684265 0.685810 0.685443 2077.0  
The result of Model Number:Dataset Number:Featuregroup Number:Rescale of 79 : 1 : 6 :  
0

|              | f1-score | precision | recall   | support |
|--------------|----------|-----------|----------|---------|
| AFIB         | 0.806309 | 0.830762  | 0.783289 | 875.0   |
| GSVT         | 0.860747 | 0.854777  | 0.866846 | 691.0   |
| SB           | 0.941762 | 0.938159  | 0.945398 | 1553.0  |
| SR           | 0.890679 | 0.877311  | 0.904513 | 907.0   |
| macro avg    | 0.874874 | 0.875252  | 0.875012 | 4026.0  |
| micro avg    | 0.887473 | 0.887473  | 0.887473 | 4026.0  |
| weighted avg | 0.886910 | 0.886798  | 0.887473 | 4026.0  |

The result of Model Number:Dataset Number:Featuregroup Number:Rescale of 79 : 1 : 6 :  
1

|              | f1-score | precision | recall   | support |
|--------------|----------|-----------|----------|---------|
| AFIB         | 0.782224 | 0.822636  | 0.745829 | 204.0   |
| GSVT         | 0.820229 | 0.812211  | 0.828424 | 300.0   |
| SB           | 0.834691 | 0.827976  | 0.841521 | 892.0   |
| SR           | 0.824381 | 0.825385  | 0.823414 | 681.0   |
| macro avg    | 0.815381 | 0.822052  | 0.809797 | 2077.0  |
| micro avg    | 0.824293 | 0.824293  | 0.824293 | 2077.0  |
| weighted avg | 0.824069 | 0.824325  | 0.824293 | 2077.0  |

The result of Model Number:Dataset Number:Featuregroup Number:Rescale of 79 : 1 : 7 :  
0

|              | f1-score | precision | recall   | support |
|--------------|----------|-----------|----------|---------|
| AFIB         | 0.825032 | 0.821814  | 0.828333 | 875.0   |
| GSVT         | 0.840473 | 0.842245  | 0.838757 | 691.0   |
| SB           | 0.892190 | 0.889966  | 0.894430 | 1553.0  |
| SR           | 0.871609 | 0.877463  | 0.865850 | 907.0   |
| macro avg    | 0.857326 | 0.857872  | 0.856843 | 4026.0  |
| micro avg    | 0.864071 | 0.864071  | 0.864071 | 4026.0  |
| weighted avg | 0.864081 | 0.864147  | 0.864071 | 4026.0  |

The result of Model Number:Dataset Number:Featuregroup Number:Rescale of 79 : 1 : 7 :  
1

|              | f1-score | precision | recall   | support |
|--------------|----------|-----------|----------|---------|
| AFIB         | 0.676755 | 0.657985  | 0.698758 | 875.0   |
| GSVT         | 0.685590 | 0.714468  | 0.663174 | 691.0   |
| SB           | 0.753144 | 0.752764  | 0.753535 | 1553.0  |
| SR           | 0.734250 | 0.738845  | 0.729717 | 907.0   |
| macro avg    | 0.712435 | 0.716015  | 0.711296 | 4026.0  |
| micro avg    | 0.720755 | 0.720755  | 0.720755 | 4026.0  |
| weighted avg | 0.720691 | 0.722456  | 0.720755 | 4026.0  |

The result of Model Number:Dataset Number:Featuregroup Number:Rescale of 79 : 1 : 8 :  
0

f1-score precision recall support  
AFIB 0.789883 0.806520 0.774044 204.0  
GSVT 0.814442 0.807001 0.822040 300.0  
SB 0.827743 0.825898 0.829599 892.0  
SR 0.817906 0.818761 0.817062 681.0  
macro avg 0.812494 0.814545 0.810686 2077.0  
micro avg 0.818940 0.818940 0.818940 2077.0  
weighted avg 0.818878 0.818925 0.818940 2077.0  
The result of Model Number:Dataset Number:Featuregroup Number:Rescale of 79 : 1 : 8 :  
1

f1-score precision recall support  
AFIB 0.849654 0.877870 0.823518 204.0  
GSVT 0.881899 0.874823 0.889222 300.0  
SB 0.901383 0.897680 0.905120 892.0  
SR 0.892965 0.892834 0.893096 681.0  
macro avg 0.881475 0.885802 0.877739 2077.0  
micro avg 0.890867 0.890867 0.890867 2077.0  
weighted avg 0.890728 0.890844 0.890867 2077.0  
The result of Model Number:Dataset Number:Featuregroup Number:Rescale of 79 : 1 : 9 :  
0

f1-score precision recall support  
AFIB 0.802923 0.837697 0.771148 204.0  
GSVT 0.750593 0.757598 0.744093 300.0  
SB 0.778044 0.739792 0.820523 892.0  
SR 0.693448 0.737211 0.654815 681.0  
macro avg 0.756252 0.768075 0.747645 2077.0  
micro avg 0.750302 0.750302 0.750302 2077.0  
weighted avg 0.748786 0.751134 0.750302 2077.0  
The result of Model Number:Dataset Number:Featuregroup Number:Rescale of 79 : 1 : 9 :  
1

f1-score precision recall support  
AFIB 0.835233 0.824570 0.846225 875.0  
GSVT 0.849894 0.854768 0.845098 691.0  
SB 0.909759 0.905938 0.913621 1553.0  
SR 0.882971 0.897263 0.869143 907.0  
macro avg 0.869464 0.870635 0.868522 4026.0  
micro avg 0.877192 0.877192 0.877192 4026.0  
weighted avg 0.877252 0.877517 0.877192 4026.0  
The result of Model Number:Dataset Number:Featuregroup Number:Rescale of 79 : 1 :  
10 : 0

f1-score precision recall support  
AFIB 0.768444 0.768397 0.768538 875.0  
GSVT 0.770107 0.765943 0.774329 691.0  
SB 0.806898 0.801529 0.812349 1553.0



SR 0.785472 0.798359 0.773023 907.0  
macro avg 0.782730 0.783557 0.782060 4026.0  
micro avg 0.787442 0.787442 0.787442 4026.0  
weighted avg 0.787399 0.787506 0.787442 4026.0  
The result of Model Number:Dataset Number:Featuregroup Number:Rescale of 79 : 1 :  
10 : 1

f1-score precision recall support  
AFIB 0.815171 0.807713 0.822804 875.0  
GSVT 0.825616 0.832900 0.818581 691.0  
SB 0.877603 0.872976 0.882292 1553.0  
SR 0.857764 0.868101 0.847748 907.0  
macro avg 0.844038 0.845423 0.842856 4026.0  
micro avg 0.850646 0.850646 0.850646 4026.0  
weighted avg 0.850642 0.850815 0.850646 4026.0

The result of Model Number:Dataset Number:Featuregroup Number:Rescale of 80 : 0 : 0 :  
0

f1-score precision recall support  
AFIB 0.863580 0.926000 0.809639 204.0  
GSVT 0.817990 0.822415 0.813947 300.0  
SB 0.854407 0.803174 0.912641 892.0  
SR 0.750233 0.809670 0.699022 681.0  
macro avg 0.821553 0.840315 0.808812 2077.0  
micro avg 0.818228 0.818228 0.818228 2077.0  
weighted avg 0.815892 0.820147 0.818228 2077.0

The result of Model Number:Dataset Number:Featuregroup Number:Rescale of 80 : 0 : 0 :  
1

f1-score precision recall support  
AFIB 0.662245 0.663356 0.678659 204.0  
GSVT 0.656019 0.681476 0.633241 300.0  
SB 0.695851 0.657690 0.738998 892.0  
SR 0.603154 0.658817 0.557691 681.0  
macro avg 0.654317 0.665335 0.652147 2077.0  
micro avg 0.658350 0.658350 0.658350 2077.0  
weighted avg 0.656404 0.662051 0.658350 2077.0

The result of Model Number:Dataset Number:Featuregroup Number:Rescale of 80 : 0 : 1 :  
0

f1-score precision recall support  
AFIB 0.824454 0.867863 0.785401 204.0  
GSVT 0.865854 0.858270 0.873612 300.0  
SB 0.888321 0.882838 0.893890 892.0  
SR 0.876202 0.874425 0.878007 681.0  
macro avg 0.863708 0.870849 0.857728 2077.0  
micro avg 0.875098 0.875098 0.875098 2077.0  
weighted avg 0.874830 0.875060 0.875098 2077.0

The result of Model Number:Dataset Number:Featuregroup Number:Rescale of 80 : 0 : 1 : 1

|              | f1-score | precision | recall   | support |
|--------------|----------|-----------|----------|---------|
| AFIB         | 0.854266 | 0.857018  | 0.851612 | 875.0   |
| GSVT         | 0.866276 | 0.852523  | 0.880559 | 691.0   |
| SB           | 0.912763 | 0.905142  | 0.920520 | 1553.0  |
| SR           | 0.866881 | 0.888897  | 0.845960 | 907.0   |
| macro avg    | 0.875046 | 0.875895  | 0.874663 | 4026.0  |
| micro avg    | 0.881888 | 0.881888  | 0.881888 | 4026.0  |
| weighted avg | 0.881734 | 0.881992  | 0.881888 | 4026.0  |

The result of Model Number:Dataset Number:Featuregroup Number:Rescale of 80 : 0 : 2 : 0

|              | f1-score | precision | recall   | support |
|--------------|----------|-----------|----------|---------|
| AFIB         | 0.743664 | 0.757553  | 0.823349 | 204.0   |
| GSVT         | 0.893063 | 0.874971  | 0.912370 | 300.0   |
| SB           | 0.734675 | 0.727812  | 0.741679 | 892.0   |
| SR           | 0.894202 | 0.901672  | 0.886979 | 681.0   |
| macro avg    | 0.816401 | 0.815502  | 0.841094 | 2077.0  |
| micro avg    | 0.821995 | 0.821995  | 0.821995 | 2077.0  |
| weighted avg | 0.810741 | 0.808993  | 0.821995 | 2077.0  |

The result of Model Number:Dataset Number:Featuregroup Number:Rescale of 80 : 0 : 2 : 1

|              | f1-score | precision | recall   | support |
|--------------|----------|-----------|----------|---------|
| AFIB         | 0.874511 | 0.874081  | 0.875009 | 875.0   |
| GSVT         | 0.893495 | 0.889098  | 0.897991 | 691.0   |
| SB           | 0.934611 | 0.928502  | 0.940809 | 1553.0  |
| SR           | 0.908006 | 0.922796  | 0.893707 | 907.0   |
| macro avg    | 0.902656 | 0.903619  | 0.901879 | 4026.0  |
| micro avg    | 0.908547 | 0.908547  | 0.908547 | 4026.0  |
| weighted avg | 0.908498 | 0.908626  | 0.908547 | 4026.0  |

The result of Model Number:Dataset Number:Featuregroup Number:Rescale of 80 : 0 : 3 : 0

|              | f1-score | precision | recall   | support |
|--------------|----------|-----------|----------|---------|
| AFIB         | 0.739391 | 0.746006  | 0.732985 | 875.0   |
| GSVT         | 0.753513 | 0.739185  | 0.768552 | 691.0   |
| SB           | 0.799791 | 0.792862  | 0.806845 | 1553.0  |
| SR           | 0.766941 | 0.784575  | 0.750117 | 907.0   |
| macro avg    | 0.764909 | 0.765657  | 0.764624 | 4026.0  |
| micro avg    | 0.771440 | 0.771440  | 0.771440 | 4026.0  |
| weighted avg | 0.771320 | 0.771599  | 0.771440 | 4026.0  |

The result of Model Number:Dataset Number:Featuregroup Number:Rescale of 80 : 0 : 3 : 1

|      | f1-score | precision | recall   | support |
|------|----------|-----------|----------|---------|
| AFIB | 0.722533 | 0.726846  | 0.718291 | 204.0   |

GSVT 0.740287 0.737108 0.743494 300.0  
SB 0.752965 0.751874 0.754061 892.0  
SR 0.746080 0.747621 0.744549 681.0  
macro avg 0.740466 0.740862 0.740099 2077.0  
micro avg 0.745903 0.745903 0.745903 2077.0  
weighted avg 0.745887 0.745889 0.745903 2077.0  
The result of Model Number:Dataset Number:Featuregroup Number:Rescale of 80 : 0 : 4 :  
0

f1-score precision recall support  
AFIB 0.871232 0.869830 0.872994 875.0  
GSVT 0.891545 0.886898 0.896293 691.0  
SB 0.932157 0.924260 0.940198 1553.0  
SR 0.896573 0.916505 0.877791 907.0  
macro avg 0.897877 0.899373 0.896819 4026.0  
micro avg 0.903997 0.903997 0.903997 4026.0  
weighted avg 0.903929 0.904270 0.903997 4026.0  
The result of Model Number:Dataset Number:Featuregroup Number:Rescale of 80 : 0 : 4 :  
1

f1-score precision recall support  
AFIB 0.882310 0.922152 0.846056 204.0  
GSVT 0.912998 0.902744 0.923653 300.0  
SB 0.878270 0.839979 0.939761 892.0  
SR 0.731719 0.737958 0.725709 681.0  
macro avg 0.851324 0.850708 0.858795 2077.0  
micro avg 0.858048 0.858048 0.858048 2077.0  
weighted avg 0.835632 0.823665 0.858048 2077.0  
The result of Model Number:Dataset Number:Featuregroup Number:Rescale of 80 : 0 : 5 :  
0

f1-score precision recall support  
AFIB 0.838686 0.846189 0.831420 875.0  
GSVT 0.854704 0.838452 0.871763 691.0  
SB 0.907197 0.899338 0.915198 1553.0  
SR 0.869936 0.889938 0.850852 907.0  
macro avg 0.867631 0.868479 0.867308 4026.0  
micro avg 0.875039 0.875039 0.875039 4026.0  
weighted avg 0.874903 0.875219 0.875039 4026.0  
The result of Model Number:Dataset Number:Featuregroup Number:Rescale of 80 : 0 : 5 :  
1

f1-score precision recall support  
AFIB 0.759339 0.763871 0.754880 204.0  
GSVT 0.777997 0.774656 0.781367 300.0  
SB 0.791321 0.790175 0.792473 892.0  
SR 0.784085 0.785705 0.782476 681.0  
macro avg 0.778185 0.778602 0.777799 2077.0

micro avg 0.783899 0.783899 0.783899 2077.0  
weighted avg 0.783883 0.783884 0.783899 2077.0  
The result of Model Number:Dataset Number:Featuregroup Number:Rescale of 80 : 0 : 6 :  
0

|              | f1-score | precision | recall   | support |
|--------------|----------|-----------|----------|---------|
| AFIB         | 0.893093 | 0.886262  | 0.900149 | 875.0   |
| GSVT         | 0.913643 | 0.918639  | 0.908754 | 691.0   |
| SB           | 0.967474 | 0.966796  | 0.968159 | 1553.0  |
| SR           | 0.941776 | 0.946344  | 0.937300 | 907.0   |
| macro avg    | 0.928996 | 0.929510  | 0.928591 | 4026.0  |
| micro avg    | 0.936230 | 0.936230  | 0.936230 | 4026.0  |
| weighted avg | 0.936280 | 0.936420  | 0.936230 | 4026.0  |

The result of Model Number:Dataset Number:Featuregroup Number:Rescale of 80 : 0 : 6 :  
1

|              | f1-score | precision | recall   | support |
|--------------|----------|-----------|----------|---------|
| AFIB         | 0.786113 | 0.802160  | 0.771042 | 204.0   |
| GSVT         | 0.814658 | 0.807580  | 0.822009 | 300.0   |
| SB           | 0.830321 | 0.828838  | 0.831810 | 892.0   |
| SR           | 0.822592 | 0.823083  | 0.822107 | 681.0   |
| macro avg    | 0.813421 | 0.815415  | 0.811742 | 2077.0  |
| micro avg    | 0.821245 | 0.821245  | 0.821245 | 2077.0  |
| weighted avg | 0.821182 | 0.821260  | 0.821245 | 2077.0  |

The result of Model Number:Dataset Number:Featuregroup Number:Rescale of 80 : 0 : 7 :  
0

|              | f1-score | precision | recall   | support |
|--------------|----------|-----------|----------|---------|
| AFIB         | 0.765046 | 0.754193  | 0.776236 | 875.0   |
| GSVT         | 0.780786 | 0.788396  | 0.773328 | 691.0   |
| SB           | 0.830909 | 0.828201  | 0.833636 | 1553.0  |
| SR           | 0.811504 | 0.821876  | 0.801400 | 907.0   |
| macro avg    | 0.797062 | 0.798167  | 0.796150 | 4026.0  |
| micro avg    | 0.803548 | 0.803548  | 0.803548 | 4026.0  |
| weighted avg | 0.803620 | 0.803860  | 0.803548 | 4026.0  |

The result of Model Number:Dataset Number:Featuregroup Number:Rescale of 80 : 0 : 7 :  
1

|              | f1-score | precision | recall   | support |
|--------------|----------|-----------|----------|---------|
| AFIB         | 0.640085 | 0.709058  | 0.583854 | 204.0   |
| GSVT         | 0.754493 | 0.743917  | 0.765568 | 300.0   |
| SB           | 0.801089 | 0.798509  | 0.803693 | 892.0   |
| SR           | 0.780579 | 0.768706  | 0.792844 | 681.0   |
| macro avg    | 0.744061 | 0.755047  | 0.736490 | 2077.0  |
| micro avg    | 0.773037 | 0.773037  | 0.773037 | 2077.0  |
| weighted avg | 0.771820 | 0.772066  | 0.773037 | 2077.0  |

The result of Model Number:Dataset Number:Featuregroup Number:Rescale of 80 : 0 : 8 :  
0

f1-score precision recall support  
AFIB 0.714205 0.729038 0.700127 875.0  
GSVT 0.696492 0.672301 0.753346 691.0  
SB 0.820925 0.817223 0.824674 1553.0  
SR 0.624106 0.614030 0.634574 907.0  
macro avg 0.713932 0.708148 0.728180 4026.0  
micro avg 0.742536 0.742536 0.742536 4026.0  
weighted avg 0.732033 0.727407 0.742536 4026.0  
The result of Model Number:Dataset Number:Featuregroup Number:Rescale of 80 : 0 : 8 :  
1

f1-score precision recall support  
AFIB 0.680355 0.671243 0.689761 875.0  
GSVT 0.695567 0.700996 0.690233 691.0  
SB 0.738498 0.736187 0.740827 1553.0  
SR 0.720639 0.730193 0.711345 907.0  
macro avg 0.708765 0.709655 0.708041 4026.0  
micro avg 0.714403 0.714403 0.714403 4026.0  
weighted avg 0.714469 0.714682 0.714403 4026.0  
The result of Model Number:Dataset Number:Featuregroup Number:Rescale of 80 : 0 : 9 :  
0

f1-score precision recall support  
AFIB 0.883960 0.926282 0.845545 204.0  
GSVT 0.931048 0.921081 0.941267 300.0  
SB 0.950824 0.945572 0.956148 892.0  
SR 0.940083 0.939268 0.940916 681.0  
macro avg 0.926479 0.933051 0.920969 2077.0  
micro avg 0.938141 0.938141 0.938141 2077.0  
weighted avg 0.937879 0.938073 0.938141 2077.0  
The result of Model Number:Dataset Number:Featuregroup Number:Rescale of 80 : 0 : 9 :  
1

f1-score precision recall support  
AFIB 0.871271 0.877368 0.865289 204.0  
GSVT 0.891542 0.887146 0.895995 300.0  
SB 0.909262 0.907748 0.910791 892.0  
SR 0.900212 0.902349 0.898096 681.0  
macro avg 0.893072 0.893653 0.892542 2077.0  
micro avg 0.900022 0.900022 0.900022 2077.0  
weighted avg 0.900004 0.900018 0.900022 2077.0  
The result of Model Number:Dataset Number:Featuregroup Number:Rescale of 80 : 0 :  
10 : 0

f1-score precision recall support  
AFIB 0.847182 0.850043 0.844371 875.0  
GSVT 0.844945 0.838993 0.851058 691.0  
SB 0.889037 0.880786 0.897451 1553.0

SR 0.855238 0.871720 0.839410 907.0  
macro avg 0.859101 0.860386 0.858073 4026.0  
micro avg 0.864876 0.864876 0.864876 4026.0  
weighted avg 0.864758 0.864889 0.864876 4026.0  
The result of Model Number:Dataset Number:Featuregroup Number:Rescale of 80 : 0 :  
10 : 1

f1-score precision recall support  
AFIB 0.672592 0.677859 0.667441 875.0  
GSVT 0.674366 0.665759 0.683240 691.0  
SB 0.707334 0.704497 0.710201 1553.0  
SR 0.692390 0.699186 0.685750 907.0  
macro avg 0.686670 0.686825 0.686658 4026.0  
micro avg 0.690772 0.690772 0.690772 4026.0  
weighted avg 0.690758 0.690862 0.690772 4026.0  
The result of Model Number:Dataset Number:Featuregroup Number:Rescale of 80 : 1 : 0 :  
0

f1-score precision recall support  
AFIB 0.732484 0.739162 0.726022 204.0  
GSVT 0.751599 0.749138 0.754100 300.0  
SB 0.765339 0.764829 0.765853 892.0  
SR 0.758608 0.758390 0.758837 681.0  
macro avg 0.752008 0.752880 0.751203 2077.0  
micro avg 0.757943 0.757943 0.757943 2077.0  
weighted avg 0.757921 0.757931 0.757943 2077.0  
The result of Model Number:Dataset Number:Featuregroup Number:Rescale of 80 : 1 : 0 :  
1

f1-score precision recall support  
AFIB 0.649421 0.693440 0.611089 204.0  
GSVT 0.611908 0.630063 0.595000 300.0  
SB 0.639597 0.608893 0.673926 892.0  
SR 0.567524 0.593290 0.544522 681.0  
macro avg 0.617112 0.631422 0.606134 2077.0  
micro avg 0.613925 0.613925 0.613925 2077.0  
weighted avg 0.612931 0.615139 0.613925 2077.0  
The result of Model Number:Dataset Number:Featuregroup Number:Rescale of 80 : 1 : 1 :  
0

f1-score precision recall support  
AFIB 0.698114 0.678751 0.720811 875.0  
GSVT 0.707228 0.737017 0.684104 691.0  
SB 0.776914 0.776521 0.777317 1553.0  
SR 0.757423 0.762163 0.752747 907.0  
macro avg 0.734920 0.738613 0.733745 4026.0  
micro avg 0.743502 0.743502 0.743502 4026.0  
weighted avg 0.743436 0.745257 0.743502 4026.0

The result of Model Number:Dataset Number:Featuregroup Number:Rescale of 80 : 1 : 1 : 1

|              | f1-score | precision | recall   | support |
|--------------|----------|-----------|----------|---------|
| AFIB         | 0.692889 | 0.707033  | 0.679606 | 204.0   |
| GSVT         | 0.718049 | 0.711810  | 0.724529 | 300.0   |
| SB           | 0.731854 | 0.730548  | 0.733167 | 892.0   |
| SR           | 0.725042 | 0.725475  | 0.724615 | 681.0   |
| macro avg    | 0.716959 | 0.718716  | 0.715479 | 2077.0  |
| micro avg    | 0.723854 | 0.723854  | 0.723854 | 2077.0  |
| weighted avg | 0.723800 | 0.723868  | 0.723854 | 2077.0  |

The result of Model Number:Dataset Number:Featuregroup Number:Rescale of 80 : 1 : 2 : 0

|              | f1-score | precision | recall   | support |
|--------------|----------|-----------|----------|---------|
| AFIB         | 0.666496 | 0.660075  | 0.673146 | 875.0   |
| GSVT         | 0.683958 | 0.685915  | 0.682084 | 691.0   |
| SB           | 0.727165 | 0.725493  | 0.728850 | 1553.0  |
| SR           | 0.706710 | 0.715025  | 0.698601 | 907.0   |
| macro avg    | 0.696082 | 0.696627  | 0.695670 | 4026.0  |
| micro avg    | 0.701902 | 0.701902  | 0.701902 | 4026.0  |
| weighted avg | 0.701955 | 0.702124  | 0.701902 | 4026.0  |

The result of Model Number:Dataset Number:Featuregroup Number:Rescale of 80 : 1 : 2 : 1

|              | f1-score | precision | recall   | support |
|--------------|----------|-----------|----------|---------|
| AFIB         | 0.661190 | 0.661307  | 0.661100 | 875.0   |
| GSVT         | 0.668185 | 0.670442  | 0.665985 | 691.0   |
| SB           | 0.701894 | 0.699474  | 0.704334 | 1553.0  |
| SR           | 0.688565 | 0.690888  | 0.686284 | 907.0   |
| macro avg    | 0.679958 | 0.680528  | 0.679426 | 4026.0  |
| micro avg    | 0.684289 | 0.684289  | 0.684289 | 4026.0  |
| weighted avg | 0.684259 | 0.684262  | 0.684289 | 4026.0  |

The result of Model Number:Dataset Number:Featuregroup Number:Rescale of 80 : 1 : 3 : 0

|              | f1-score | precision | recall   | support |
|--------------|----------|-----------|----------|---------|
| AFIB         | 0.701708 | 0.714813  | 0.776898 | 204.0   |
| GSVT         | 0.842678 | 0.825607  | 0.860896 | 300.0   |
| SB           | 0.693226 | 0.686750  | 0.699834 | 892.0   |
| SR           | 0.843753 | 0.850801  | 0.836937 | 681.0   |
| macro avg    | 0.770341 | 0.769493  | 0.793641 | 2077.0  |
| micro avg    | 0.775620 | 0.775620  | 0.775620 | 2077.0  |
| weighted avg | 0.765000 | 0.763351  | 0.775620 | 2077.0  |

The result of Model Number:Dataset Number:Featuregroup Number:Rescale of 80 : 1 : 3 : 1

|      | f1-score | precision | recall   | support |
|------|----------|-----------|----------|---------|
| AFIB | 0.498490 | 0.543027  | 0.526416 | 204.0   |

GSVT 0.677087 0.666019 0.688763 300.0  
SB 0.576410 0.572020 0.580912 892.0  
SR 0.704856 0.696881 0.713037 681.0  
macro avg 0.614211 0.619487 0.627282 2077.0  
micro avg 0.634458 0.634458 0.634458 2077.0  
weighted avg 0.625413 0.623688 0.634458 2077.0  
The result of Model Number:Dataset Number:Featuregroup Number:Rescale of 80 : 1 : 4 :  
0

f1-score precision recall support  
AFIB 0.806800 0.812928 0.800833 204.0  
GSVT 0.823317 0.815276 0.831537 300.0  
SB 0.842522 0.840368 0.844694 892.0  
SR 0.833585 0.838294 0.828939 681.0  
macro avg 0.826556 0.826716 0.826501 2077.0  
micro avg 0.833320 0.833320 0.833320 2077.0  
weighted avg 0.833309 0.833369 0.833320 2077.0  
The result of Model Number:Dataset Number:Featuregroup Number:Rescale of 80 : 1 : 4 :  
1

f1-score precision recall support  
AFIB 0.932793 0.933842 0.931916 204.0  
GSVT 0.954209 0.952079 0.956422 300.0  
SB 0.974434 0.973133 0.975744 892.0  
SR 0.967136 0.969572 0.964725 681.0  
macro avg 0.957143 0.957156 0.957201 2077.0  
micro avg 0.965035 0.965035 0.965035 2077.0  
weighted avg 0.965030 0.965065 0.965035 2077.0  
The result of Model Number:Dataset Number:Featuregroup Number:Rescale of 80 : 1 : 5 :  
0

f1-score precision recall support  
AFIB 0.762377 0.763905 0.760888 875.0  
GSVT 0.764265 0.760139 0.768457 691.0  
SB 0.798914 0.794646 0.803233 1553.0  
SR 0.779801 0.789048 0.770790 907.0  
macro avg 0.776339 0.776935 0.775842 4026.0  
micro avg 0.780752 0.780752 0.780752 4026.0  
weighted avg 0.780720 0.780781 0.780752 4026.0  
The result of Model Number:Dataset Number:Featuregroup Number:Rescale of 80 : 1 : 5 :  
1

f1-score precision recall support  
AFIB 0.690553 0.708801 0.673289 204.0  
GSVT 0.709491 0.703597 0.715615 300.0  
SB 0.729042 0.726366 0.731739 892.0  
SR 0.717754 0.718623 0.716905 681.0  
macro avg 0.711710 0.714347 0.709387 2077.0



micro avg 0.718805 0.718805 0.718805 2077.0  
weighted avg 0.718737 0.718814 0.718805 2077.0  
The result of Model Number:Dataset Number:Featuregroup Number:Rescale of 80 : 1 : 6 :  
0

|              | f1-score | precision | recall   | support |
|--------------|----------|-----------|----------|---------|
| AFIB         | 0.786567 | 0.792225  | 0.780991 | 875.0   |
| GSVT         | 0.785314 | 0.780612  | 0.790086 | 691.0   |
| SB           | 0.828391 | 0.819213  | 0.837779 | 1553.0  |
| SR           | 0.794905 | 0.809087  | 0.781238 | 907.0   |
| macro avg    | 0.798794 | 0.800284  | 0.797524 | 4026.0  |
| micro avg    | 0.804513 | 0.804513  | 0.804513 | 4026.0  |
| weighted avg | 0.804364 | 0.804441  | 0.804513 | 4026.0  |

The result of Model Number:Dataset Number:Featuregroup Number:Rescale of 80 : 1 : 6 :  
1

|              | f1-score | precision | recall   | support |
|--------------|----------|-----------|----------|---------|
| AFIB         | 0.842243 | 0.852090  | 0.832782 | 204.0   |
| GSVT         | 0.865413 | 0.861433  | 0.869452 | 300.0   |
| SB           | 0.877665 | 0.874936  | 0.880418 | 892.0   |
| SR           | 0.870107 | 0.872573  | 0.867692 | 681.0   |
| macro avg    | 0.863857 | 0.865258  | 0.862586 | 2077.0  |
| micro avg    | 0.869983 | 0.869983  | 0.869983 | 2077.0  |
| weighted avg | 0.869938 | 0.869967  | 0.869983 | 2077.0  |

The result of Model Number:Dataset Number:Featuregroup Number:Rescale of 80 : 1 : 7 :  
0

|              | f1-score | precision | recall   | support |
|--------------|----------|-----------|----------|---------|
| AFIB         | 0.764208 | 0.766788  | 0.761672 | 875.0   |
| GSVT         | 0.762189 | 0.756821  | 0.767704 | 691.0   |
| SB           | 0.801963 | 0.794520  | 0.809553 | 1553.0  |
| SR           | 0.771475 | 0.786342  | 0.757197 | 907.0   |
| macro avg    | 0.774959 | 0.776118  | 0.774031 | 4026.0  |
| micro avg    | 0.780169 | 0.780169  | 0.780169 | 4026.0  |
| weighted avg | 0.780062 | 0.780180  | 0.780169 | 4026.0  |

The result of Model Number:Dataset Number:Featuregroup Number:Rescale of 80 : 1 : 7 :  
1

|              | f1-score | precision | recall   | support |
|--------------|----------|-----------|----------|---------|
| AFIB         | 0.751519 | 0.766082  | 0.737837 | 204.0   |
| GSVT         | 0.780661 | 0.774134  | 0.787444 | 300.0   |
| SB           | 0.795228 | 0.793632  | 0.796832 | 892.0   |
| SR           | 0.787645 | 0.788461  | 0.786834 | 681.0   |
| macro avg    | 0.778763 | 0.780577  | 0.777237 | 2077.0  |
| micro avg    | 0.786404 | 0.786404  | 0.786404 | 2077.0  |
| weighted avg | 0.786345 | 0.786414  | 0.786404 | 2077.0  |

The result of Model Number:Dataset Number:Featuregroup Number:Rescale of 80 : 1 : 8 :  
0

f1-score precision recall support  
AFIB 0.852646 0.844432 0.861154 875.0  
GSVT 0.874986 0.877489 0.872588 691.0  
SB 0.930260 0.928121 0.932416 1553.0  
SR 0.904092 0.914730 0.893718 907.0  
macro avg 0.890496 0.891193 0.889969 4026.0  
micro avg 0.897941 0.897941 0.897941 4026.0  
weighted avg 0.898009 0.898225 0.897941 4026.0  
The result of Model Number:Dataset Number:Featuregroup Number:Rescale of 80 : 1 : 8 :  
1

f1-score precision recall support  
AFIB 0.860577 0.889155 0.834105 204.0  
GSVT 0.893236 0.886070 0.900653 300.0  
SB 0.912971 0.909220 0.916756 892.0  
SR 0.904444 0.904312 0.904578 681.0  
macro avg 0.892807 0.897189 0.889023 2077.0  
micro avg 0.902319 0.902319 0.902319 2077.0  
weighted avg 0.902179 0.902296 0.902319 2077.0  
The result of Model Number:Dataset Number:Featuregroup Number:Rescale of 80 : 1 : 9 :  
0

f1-score precision recall support  
AFIB 0.727659 0.729466 0.725910 875.0  
GSVT 0.740190 0.742414 0.738073 691.0  
SB 0.785208 0.779879 0.790617 1553.0  
SR 0.770267 0.775985 0.764662 907.0  
macro avg 0.755831 0.756936 0.754815 4026.0  
micro avg 0.761688 0.761688 0.761688 4026.0  
weighted avg 0.761608 0.761615 0.761688 4026.0  
The result of Model Number:Dataset Number:Featuregroup Number:Rescale of 80 : 1 : 9 :  
1

f1-score precision recall support  
AFIB 0.669872 0.666499 0.673309 875.0  
GSVT 0.682920 0.686226 0.679656 691.0  
SB 0.727351 0.725677 0.729036 1553.0  
SR 0.709143 0.712937 0.705396 907.0  
macro avg 0.697322 0.697835 0.696849 4026.0  
micro avg 0.703123 0.703123 0.703123 4026.0  
weighted avg 0.703131 0.703174 0.703123 4026.0  
The result of Model Number:Dataset Number:Featuregroup Number:Rescale of 80 : 1 :  
10 : 0

f1-score precision recall support  
AFIB 0.761854 0.790196 0.735816 204.0  
GSVT 0.706972 0.739778 0.677017 300.0  
SB 0.740581 0.695913 0.791390 892.0

SR 0.650373 0.695560 0.610775 681.0  
macro avg 0.714945 0.730362 0.703749 2077.0  
micro avg 0.710192 0.710192 0.710192 2077.0  
weighted avg 0.708239 0.711393 0.710192 2077.0  
The result of Model Number:Dataset Number:Featuregroup Number:Rescale of 80 : 1 :

10 : 1

f1-score precision recall support

AFIB 0.839326 0.845979 0.832798 875.0  
GSVT 0.849967 0.846219 0.853776 691.0  
SB 0.903839 0.900266 0.907448 1553.0  
SR 0.881629 0.884120 0.879195 907.0  
macro avg 0.868690 0.869146 0.868304 4026.0  
micro avg 0.875646 0.875646 0.875646 4026.0  
weighted avg 0.875568 0.875554 0.875646 4026.0

The result of Model Number:Dataset Number:Featuregroup Number:Rescale of 81 : 0 : 0 : 0

f1-score precision recall support

AFIB 0.838438 0.850756 0.826549 204.0  
GSVT 0.859682 0.852373 0.867135 300.0  
SB 0.874540 0.871041 0.878069 892.0  
SR 0.865890 0.870140 0.861692 681.0  
macro avg 0.859638 0.861078 0.858361 2077.0  
micro avg 0.866060 0.866060 0.866060 2077.0  
weighted avg 0.866012 0.866057 0.866060 2077.0

The result of Model Number:Dataset Number:Featuregroup Number:Rescale of 81 : 0 : 0 : 1

f1-score precision recall support

AFIB 0.826267 0.805123 0.848628 875.0  
GSVT 0.781078 0.825347 0.741497 691.0  
SB 0.828216 0.762158 0.906832 1553.0  
SR 0.661605 0.803606 0.562372 907.0  
macro avg 0.774291 0.799058 0.764832 4026.0  
micro avg 0.788203 0.788203 0.788203 4026.0  
weighted avg 0.782167 0.791679 0.788203 4026.0

The result of Model Number:Dataset Number:Featuregroup Number:Rescale of 81 : 0 : 1 : 0

f1-score precision recall support

AFIB 0.854368 0.847833 0.861118 875.0  
GSVT 0.874026 0.878806 0.869350 691.0  
SB 0.925523 0.924875 0.926179 1553.0  
SR 0.900940 0.905310 0.896658 907.0  
macro avg 0.888714 0.889206 0.888326 4026.0  
micro avg 0.895634 0.895634 0.895634 4026.0  
weighted avg 0.895682 0.895816 0.895634 4026.0

The result of Model Number:Dataset Number:Featuregroup Number:Rescale of 81 : 0 : 1 : 1

|              | f1-score | precision | recall   | support |
|--------------|----------|-----------|----------|---------|
| AFIB         | 0.799160 | 0.788091  | 0.810577 | 875.0   |
| GSVT         | 0.816885 | 0.823496  | 0.810384 | 691.0   |
| SB           | 0.867114 | 0.864622  | 0.869625 | 1553.0  |
| SR           | 0.846020 | 0.857031  | 0.835296 | 907.0   |
| macro avg    | 0.832295 | 0.833310  | 0.831470 | 4026.0  |
| micro avg    | 0.838890 | 0.838890  | 0.838890 | 4026.0  |
| weighted avg | 0.838972 | 0.839220  | 0.838890 | 4026.0  |

The result of Model Number:Dataset Number:Featuregroup Number:Rescale of 81 : 0 : 2 : 0

|              | f1-score | precision | recall   | support |
|--------------|----------|-----------|----------|---------|
| AFIB         | 0.820657 | 0.833662  | 0.808161 | 204.0   |
| GSVT         | 0.841751 | 0.834588  | 0.849043 | 300.0   |
| SB           | 0.856284 | 0.854376  | 0.858204 | 892.0   |
| SR           | 0.848171 | 0.850056  | 0.846310 | 681.0   |
| macro avg    | 0.841716 | 0.843170  | 0.840430 | 2077.0  |
| micro avg    | 0.848066 | 0.848066  | 0.848066 | 2077.0  |
| weighted avg | 0.848026 | 0.848067  | 0.848066 | 2077.0  |

The result of Model Number:Dataset Number:Featuregroup Number:Rescale of 81 : 0 : 2 : 1

|              | f1-score | precision | recall   | support |
|--------------|----------|-----------|----------|---------|
| AFIB         | 0.668813 | 0.684054  | 0.654343 | 875.0   |
| GSVT         | 0.711702 | 0.713109  | 0.710539 | 691.0   |
| SB           | 0.778650 | 0.774388  | 0.782961 | 1553.0  |
| SR           | 0.735941 | 0.727014  | 0.745192 | 907.0   |
| macro avg    | 0.723776 | 0.724641  | 0.723259 | 4026.0  |
| micro avg    | 0.734069 | 0.734069  | 0.734069 | 4026.0  |
| weighted avg | 0.733666 | 0.733565  | 0.734069 | 4026.0  |

The result of Model Number:Dataset Number:Featuregroup Number:Rescale of 81 : 0 : 3 : 0

|              | f1-score | precision | recall   | support |
|--------------|----------|-----------|----------|---------|
| AFIB         | 0.867418 | 0.873714  | 0.861275 | 875.0   |
| GSVT         | 0.886446 | 0.878207  | 0.894908 | 691.0   |
| SB           | 0.952670 | 0.946918  | 0.958497 | 1553.0  |
| SR           | 0.921447 | 0.931736  | 0.911386 | 907.0   |
| macro avg    | 0.906995 | 0.907644  | 0.906517 | 4026.0  |
| micro avg    | 0.915840 | 0.915840  | 0.915840 | 4026.0  |
| weighted avg | 0.915741 | 0.915795  | 0.915840 | 4026.0  |

The result of Model Number:Dataset Number:Featuregroup Number:Rescale of 81 : 0 : 3 : 1

|      | f1-score | precision | recall   | support |
|------|----------|-----------|----------|---------|
| AFIB | 0.842481 | 0.869845  | 0.816952 | 204.0   |

GSVT 0.865741 0.854702 0.877243 300.0  
SB 0.890166 0.886809 0.893558 892.0  
SR 0.877716 0.879305 0.876166 681.0  
macro avg 0.869026 0.872665 0.865980 2077.0  
micro avg 0.877975 0.877975 0.877975 2077.0  
weighted avg 0.877872 0.878045 0.877975 2077.0  
The result of Model Number:Dataset Number:Featuregroup Number:Rescale of 81 : 0 : 4 :  
0

f1-score precision recall support  
AFIB 0.838255 0.923392 0.768297 204.0  
GSVT 0.774124 0.827655 0.727459 300.0  
SB 0.842791 0.787482 0.906470 892.0  
SR 0.729450 0.767794 0.694953 681.0  
macro avg 0.796155 0.826581 0.774295 2077.0  
micro avg 0.797691 0.797691 0.797691 2077.0  
weighted avg 0.795266 0.800178 0.797691 2077.0  
The result of Model Number:Dataset Number:Featuregroup Number:Rescale of 81 : 0 : 4 :  
1

f1-score precision recall support  
AFIB 0.923662 0.932083 0.915514 204.0  
GSVT 0.947767 0.944663 0.950920 300.0  
SB 0.965093 0.964449 0.965740 892.0  
SR 0.956605 0.956330 0.956894 681.0  
macro avg 0.948282 0.949381 0.947267 2077.0  
micro avg 0.955766 0.955766 0.955766 2077.0  
weighted avg 0.955738 0.955750 0.955766 2077.0  
The result of Model Number:Dataset Number:Featuregroup Number:Rescale of 81 : 0 : 5 :  
0

f1-score precision recall support  
AFIB 0.817356 0.809342 0.873917 204.0  
GSVT 0.732885 0.724737 0.741402 300.0  
SB 0.941803 0.934945 0.948769 892.0  
SR 0.926008 0.932422 0.919758 681.0  
macro avg 0.854513 0.850361 0.870962 2077.0  
micro avg 0.901953 0.901953 0.901953 2077.0  
weighted avg 0.894225 0.891419 0.901953 2077.0  
The result of Model Number:Dataset Number:Featuregroup Number:Rescale of 81 : 0 : 5 :  
1

f1-score precision recall support  
AFIB 0.846024 0.840492 0.851704 875.0  
GSVT 0.871170 0.878582 0.863998 691.0  
SB 0.927478 0.925458 0.929509 1553.0  
SR 0.904875 0.908508 0.901284 907.0  
macro avg 0.887387 0.888260 0.886623 4026.0

micro avg 0.894996 0.894996 0.894996 4026.0  
weighted avg 0.895018 0.895127 0.894996 4026.0  
The result of Model Number:Dataset Number:Featuregroup Number:Rescale of 81 : 0 : 6 :  
0

|              | f1-score | precision | recall   | support |
|--------------|----------|-----------|----------|---------|
| AFIB         | 0.784631 | 0.783109  | 0.786259 | 875.0   |
| GSVT         | 0.799364 | 0.785378  | 0.813934 | 691.0   |
| SB           | 0.856345 | 0.844195  | 0.868859 | 1553.0  |
| SR           | 0.811185 | 0.847346  | 0.778018 | 907.0   |
| macro avg    | 0.812881 | 0.815007  | 0.811768 | 4026.0  |
| micro avg    | 0.821015 | 0.821015  | 0.821015 | 4026.0  |
| weighted avg | 0.820805 | 0.821534  | 0.821015 | 4026.0  |

The result of Model Number:Dataset Number:Featuregroup Number:Rescale of 81 : 0 : 6 :  
1

|              | f1-score | precision | recall   | support |
|--------------|----------|-----------|----------|---------|
| AFIB         | 0.704693 | 0.695449  | 0.714218 | 875.0   |
| GSVT         | 0.715482 | 0.723435  | 0.707714 | 691.0   |
| SB           | 0.758860 | 0.757070  | 0.760665 | 1553.0  |
| SR           | 0.739861 | 0.746520  | 0.733330 | 907.0   |
| macro avg    | 0.729724 | 0.730618  | 0.728982 | 4026.0  |
| micro avg    | 0.735324 | 0.735324  | 0.735324 | 4026.0  |
| weighted avg | 0.735362 | 0.735528  | 0.735324 | 4026.0  |

The result of Model Number:Dataset Number:Featuregroup Number:Rescale of 81 : 0 : 7 :  
0

|              | f1-score | precision | recall   | support |
|--------------|----------|-----------|----------|---------|
| AFIB         | 0.737963 | 0.747529  | 0.728835 | 204.0   |
| GSVT         | 0.766518 | 0.766022  | 0.767037 | 300.0   |
| SB           | 0.782669 | 0.781016  | 0.784334 | 892.0   |
| SR           | 0.774797 | 0.774357  | 0.775254 | 681.0   |
| macro avg    | 0.765487 | 0.767231  | 0.763865 | 2077.0  |
| micro avg    | 0.773407 | 0.773407  | 0.773407 | 2077.0  |
| weighted avg | 0.773364 | 0.773378  | 0.773407 | 2077.0  |

The result of Model Number:Dataset Number:Featuregroup Number:Rescale of 81 : 0 : 7 :  
1

|              | f1-score | precision | recall   | support |
|--------------|----------|-----------|----------|---------|
| AFIB         | 0.702429 | 0.724142  | 0.682593 | 204.0   |
| GSVT         | 0.655709 | 0.669964  | 0.642531 | 300.0   |
| SB           | 0.691607 | 0.660912  | 0.725326 | 892.0   |
| SR           | 0.622716 | 0.654715  | 0.593787 | 681.0   |
| macro avg    | 0.668115 | 0.677433  | 0.661059 | 2077.0  |
| micro avg    | 0.666042 | 0.666042  | 0.666042 | 2077.0  |
| weighted avg | 0.664897 | 0.666398  | 0.666042 | 2077.0  |

The result of Model Number:Dataset Number:Featuregroup Number:Rescale of 81 : 0 : 8 :  
0

f1-score precision recall support  
AFIB 0.773442 0.743873 0.822094 875.0  
GSVT 0.801417 0.773758 0.838933 691.0  
SB 0.892927 0.877166 0.910246 1553.0  
SR 0.756289 0.909394 0.652953 907.0  
macro avg 0.806019 0.826048 0.806056 4026.0  
micro avg 0.820883 0.820883 0.820883 4026.0  
weighted avg 0.820469 0.837708 0.820883 4026.0  
The result of Model Number:Dataset Number:Featuregroup Number:Rescale of 81 : 0 : 8 :  
1

f1-score precision recall support  
AFIB 0.742597 0.759519 0.726530 875.0  
GSVT 0.790218 0.791780 0.788926 691.0  
SB 0.864551 0.859819 0.869338 1553.0  
SR 0.817131 0.807219 0.827403 907.0  
macro avg 0.803624 0.804584 0.803049 4026.0  
micro avg 0.815052 0.815052 0.815052 4026.0  
weighted avg 0.814605 0.814492 0.815052 4026.0  
The result of Model Number:Dataset Number:Featuregroup Number:Rescale of 81 : 0 : 9 :  
0

f1-score precision recall support  
AFIB 0.823517 0.852106 0.796895 204.0  
GSVT 0.839307 0.830119 0.848804 300.0  
SB 0.861650 0.855463 0.867929 892.0  
SR 0.846262 0.850423 0.842156 681.0  
macro avg 0.842684 0.847028 0.838946 2077.0  
micro avg 0.849739 0.849739 0.849739 2077.0  
weighted avg 0.849632 0.849820 0.849739 2077.0  
The result of Model Number:Dataset Number:Featuregroup Number:Rescale of 81 : 0 : 9 :  
1

f1-score precision recall support  
AFIB 0.606777 0.611802 0.683451 204.0  
GSVT 0.658008 0.629845 0.742387 300.0  
SB 0.600786 0.598698 0.602890 892.0  
SR 0.594812 0.594925 0.594704 681.0  
macro avg 0.615096 0.608817 0.655858 2077.0  
micro avg 0.628268 0.628268 0.628268 2077.0  
weighted avg 0.607681 0.603247 0.628268 2077.0  
The result of Model Number:Dataset Number:Featuregroup Number:Rescale of 81 : 0 :  
10 : 0

f1-score precision recall support  
AFIB 0.736627 0.716196 0.760576 875.0  
GSVT 0.746243 0.777676 0.721844 691.0  
SB 0.819774 0.819360 0.820199 1553.0

SR 0.799208 0.804209 0.794274 907.0  
macro avg 0.775463 0.779360 0.774223 4026.0  
micro avg 0.784519 0.784519 0.784519 4026.0  
weighted avg 0.784449 0.786371 0.784519 4026.0  
The result of Model Number:Dataset Number:Featuregroup Number:Rescale of 81 : 0 :

10 : 1

f1-score precision recall support

AFIB 0.858017 0.867150 0.849550 204.0  
GSVT 0.883233 0.877348 0.889456 300.0  
SB 0.901897 0.901091 0.902706 892.0  
SR 0.894293 0.895486 0.893108 681.0  
macro avg 0.884360 0.885269 0.883705 2077.0  
micro avg 0.892424 0.892424 0.892424 2077.0  
weighted avg 0.892398 0.892490 0.892424 2077.0

The result of Model Number:Dataset Number:Featuregroup Number:Rescale of 81 : 1 : 0 :  
0

f1-score precision recall support

AFIB 0.597243 0.622178 0.574337 875.0  
GSVT 0.645231 0.641964 0.648609 691.0  
SB 0.707515 0.703533 0.711561 1553.0  
SR 0.662481 0.647771 0.677887 907.0  
macro avg 0.653117 0.653862 0.653099 4026.0  
micro avg 0.663346 0.663346 0.663346 4026.0  
weighted avg 0.662713 0.662722 0.663346 4026.0

The result of Model Number:Dataset Number:Featuregroup Number:Rescale of 81 : 1 : 0 :  
1

f1-score precision recall support

AFIB 0.781577 0.780062 0.783200 875.0  
GSVT 0.796253 0.782322 0.810767 691.0  
SB 0.853013 0.840910 0.865478 1553.0  
SR 0.808028 0.844049 0.774990 907.0  
macro avg 0.809718 0.811836 0.808609 4026.0  
micro avg 0.817820 0.817820 0.817820 4026.0  
weighted avg 0.817611 0.818337 0.817820 4026.0

The result of Model Number:Dataset Number:Featuregroup Number:Rescale of 81 : 1 : 1 :  
0

f1-score precision recall support

AFIB 0.886531 0.906251 0.867840 204.0  
GSVT 0.924302 0.918558 0.930154 300.0  
SB 0.944366 0.942377 0.946375 892.0  
SR 0.934308 0.933647 0.934999 681.0  
macro avg 0.922377 0.925208 0.919842 2077.0  
micro avg 0.932589 0.932589 0.932589 2077.0  
weighted avg 0.932490 0.932526 0.932589 2077.0



The result of Model Number:Dataset Number:Featuregroup Number:Rescale of 81 : 1 : 1 : 1

|              | f1-score | precision | recall   | support |
|--------------|----------|-----------|----------|---------|
| AFIB         | 0.599574 | 0.613237  | 0.586602 | 875.0   |
| GSVT         | 0.638023 | 0.639284  | 0.636980 | 691.0   |
| SB           | 0.698040 | 0.694219  | 0.701905 | 1553.0  |
| SR           | 0.659753 | 0.651750  | 0.668046 | 907.0   |
| macro avg    | 0.648847 | 0.649623  | 0.648383 | 4026.0  |
| micro avg    | 0.658074 | 0.658074  | 0.658074 | 4026.0  |
| weighted avg | 0.657713 | 0.657622  | 0.658074 | 4026.0  |

The result of Model Number:Dataset Number:Featuregroup Number:Rescale of 81 : 1 : 2 : 0

|              | f1-score | precision | recall   | support |
|--------------|----------|-----------|----------|---------|
| AFIB         | 0.871900 | 0.886395  | 0.858071 | 204.0   |
| GSVT         | 0.888619 | 0.882306  | 0.895089 | 300.0   |
| SB           | 0.909230 | 0.904120  | 0.914419 | 892.0   |
| SR           | 0.897646 | 0.903138  | 0.892250 | 681.0   |
| macro avg    | 0.891849 | 0.893990  | 0.889957 | 2077.0  |
| micro avg    | 0.898824 | 0.898824  | 0.898824 | 2077.0  |
| weighted avg | 0.898788 | 0.898906  | 0.898824 | 2077.0  |

The result of Model Number:Dataset Number:Featuregroup Number:Rescale of 81 : 1 : 2 : 1

|              | f1-score | precision | recall   | support |
|--------------|----------|-----------|----------|---------|
| AFIB         | 0.848505 | 0.854563  | 0.842684 | 204.0   |
| GSVT         | 0.878174 | 0.877608  | 0.878758 | 300.0   |
| SB           | 0.895745 | 0.893757  | 0.897750 | 892.0   |
| SR           | 0.887738 | 0.888812  | 0.886694 | 681.0   |
| macro avg    | 0.877541 | 0.878685  | 0.876472 | 2077.0  |
| micro avg    | 0.885973 | 0.885973  | 0.885973 | 2077.0  |
| weighted avg | 0.885942 | 0.885954  | 0.885973 | 2077.0  |

The result of Model Number:Dataset Number:Featuregroup Number:Rescale of 81 : 1 : 3 : 0

|              | f1-score | precision | recall   | support |
|--------------|----------|-----------|----------|---------|
| AFIB         | 0.742939 | 0.744784  | 0.741153 | 875.0   |
| GSVT         | 0.755733 | 0.758003  | 0.753572 | 691.0   |
| SB           | 0.801697 | 0.796255  | 0.807219 | 1553.0  |
| SR           | 0.786441 | 0.792279  | 0.780719 | 907.0   |
| macro avg    | 0.771702 | 0.772830  | 0.770665 | 4026.0  |
| micro avg    | 0.777682 | 0.777682  | 0.777682 | 4026.0  |
| weighted avg | 0.777600 | 0.777607  | 0.777682 | 4026.0  |

The result of Model Number:Dataset Number:Featuregroup Number:Rescale of 81 : 1 : 3 : 1

|      | f1-score | precision | recall   | support |
|------|----------|-----------|----------|---------|
| AFIB | 0.698943 | 0.697812  | 0.700140 | 875.0   |

GSVT 0.705347 0.708152 0.702600 691.0  
SB 0.740737 0.738045 0.743455 1553.0  
SR 0.728621 0.732307 0.725013 907.0  
macro avg 0.718412 0.719079 0.717802 4026.0  
micro avg 0.722874 0.722874 0.722874 4026.0  
weighted avg 0.722850 0.722877 0.722874 4026.0  
The result of Model Number:Dataset Number:Featuregroup Number:Rescale of 81 : 1 : 4 :  
0

f1-score precision recall support  
AFIB 0.658900 0.717769 0.695813 204.0  
GSVT 0.894969 0.880339 0.910402 300.0  
SB 0.761895 0.756091 0.767844 892.0  
SR 0.931673 0.921131 0.942486 681.0  
macro avg 0.811859 0.818832 0.829136 2077.0  
micro avg 0.838621 0.838621 0.838621 2077.0  
weighted avg 0.826666 0.824386 0.838621 2077.0  
The result of Model Number:Dataset Number:Featuregroup Number:Rescale of 81 : 1 : 4 :  
1

f1-score precision recall support  
AFIB 0.817321 0.853646 0.784075 204.0  
GSVT 0.851381 0.844697 0.858190 300.0  
SB 0.864386 0.857718 0.871166 892.0  
SR 0.854823 0.856234 0.853446 681.0  
macro avg 0.846978 0.853074 0.841719 2077.0  
micro avg 0.854928 0.854928 0.854928 2077.0  
weighted avg 0.854749 0.854951 0.854928 2077.0  
The result of Model Number:Dataset Number:Featuregroup Number:Rescale of 81 : 1 : 5 :  
0

f1-score precision recall support  
AFIB 0.911455 0.931265 0.892720 204.0  
GSVT 0.949079 0.943480 0.954770 300.0  
SB 0.969469 0.967319 0.971640 892.0  
SR 0.959750 0.959209 0.960316 681.0  
macro avg 0.947438 0.950318 0.944862 2077.0  
micro avg 0.957739 0.957739 0.957739 2077.0  
weighted avg 0.957639 0.957675 0.957739 2077.0  
The result of Model Number:Dataset Number:Featuregroup Number:Rescale of 81 : 1 : 5 :  
1

f1-score precision recall support  
AFIB 0.794638 0.822427 0.769032 204.0  
GSVT 0.828197 0.823148 0.833421 300.0  
SB 0.845203 0.841731 0.848708 892.0  
SR 0.837389 0.836168 0.838619 681.0  
macro avg 0.826357 0.830869 0.822445 2077.0

micro avg 0.835366 0.835366 0.835366 2077.0  
weighted avg 0.835218 0.835327 0.835366 2077.0  
The result of Model Number:Dataset Number:Featuregroup Number:Rescale of 81 : 1 : 6 :  
0

|              | f1-score | precision | recall   | support |
|--------------|----------|-----------|----------|---------|
| AFIB         | 0.898089 | 0.898035  | 0.898199 | 875.0   |
| GSVT         | 0.900033 | 0.895167  | 0.904967 | 691.0   |
| SB           | 0.943031 | 0.936756  | 0.949402 | 1553.0  |
| SR           | 0.917990 | 0.933052  | 0.903441 | 907.0   |
| macro avg    | 0.914786 | 0.915752  | 0.914003 | 4026.0  |
| micro avg    | 0.920293 | 0.920293  | 0.920293 | 4026.0  |
| weighted avg | 0.920242 | 0.920368  | 0.920293 | 4026.0  |

The result of Model Number:Dataset Number:Featuregroup Number:Rescale of 81 : 1 : 6 :  
1

|              | f1-score | precision | recall   | support |
|--------------|----------|-----------|----------|---------|
| AFIB         | 0.779686 | 0.778984  | 0.780465 | 875.0   |
| GSVT         | 0.793194 | 0.785931  | 0.800654 | 691.0   |
| SB           | 0.832362 | 0.825044  | 0.839812 | 1553.0  |
| SR           | 0.793175 | 0.812784  | 0.774560 | 907.0   |
| macro avg    | 0.799604 | 0.800686  | 0.798873 | 4026.0  |
| micro avg    | 0.805492 | 0.805492  | 0.805492 | 4026.0  |
| weighted avg | 0.805363 | 0.805558  | 0.805492 | 4026.0  |

The result of Model Number:Dataset Number:Featuregroup Number:Rescale of 81 : 1 : 7 :  
0

|              | f1-score | precision | recall   | support |
|--------------|----------|-----------|----------|---------|
| AFIB         | 0.809690 | 0.805157  | 0.814314 | 875.0   |
| GSVT         | 0.816283 | 0.821100  | 0.811574 | 691.0   |
| SB           | 0.859888 | 0.857196  | 0.862599 | 1553.0  |
| SR           | 0.842864 | 0.848440  | 0.837381 | 907.0   |
| macro avg    | 0.832181 | 0.832973  | 0.831467 | 4026.0  |
| micro avg    | 0.837666 | 0.837666  | 0.837666 | 4026.0  |
| weighted avg | 0.837659 | 0.837718  | 0.837666 | 4026.0  |

The result of Model Number:Dataset Number:Featuregroup Number:Rescale of 81 : 1 : 7 :  
1

|              | f1-score | precision | recall   | support |
|--------------|----------|-----------|----------|---------|
| AFIB         | 0.766693 | 0.770327  | 0.763097 | 875.0   |
| GSVT         | 0.776204 | 0.772542  | 0.779918 | 691.0   |
| SB           | 0.818714 | 0.816985  | 0.820453 | 1553.0  |
| SR           | 0.803199 | 0.805448  | 0.800981 | 907.0   |
| macro avg    | 0.791202 | 0.791326  | 0.791113 | 4026.0  |
| micro avg    | 0.796644 | 0.796644  | 0.796644 | 4026.0  |
| weighted avg | 0.796616 | 0.796618  | 0.796644 | 4026.0  |

The result of Model Number:Dataset Number:Featuregroup Number:Rescale of 81 : 1 : 8 :  
0

f1-score precision recall support  
AFIB 0.758341 0.740505 0.798367 875.0  
GSVT 0.728697 0.721979 0.745302 691.0  
SB 0.790321 0.734673 0.856000 1553.0  
SR 0.492775 0.618019 0.410373 907.0  
macro avg 0.692533 0.703794 0.702511 4026.0  
micro avg 0.724081 0.724081 0.724081 4026.0  
weighted avg 0.705761 0.707481 0.724081 4026.0  
The result of Model Number:Dataset Number:Featuregroup Number:Rescale of 81 : 1 : 8 :  
1

f1-score precision recall support  
AFIB 0.638554 0.634533 0.719287 204.0  
GSVT 0.778408 0.774404 0.782584 300.0  
SB 0.800571 0.796762 0.804426 892.0  
SR 0.627958 0.630027 0.626281 681.0  
macro avg 0.711373 0.708931 0.733144 2077.0  
micro avg 0.734499 0.734499 0.734499 2077.0  
weighted avg 0.724861 0.722930 0.734499 2077.0  
The result of Model Number:Dataset Number:Featuregroup Number:Rescale of 81 : 1 : 9 :  
0

f1-score precision recall support  
AFIB 0.705103 0.708802 0.701485 875.0  
GSVT 0.719847 0.718554 0.721196 691.0  
SB 0.781631 0.775636 0.787720 1553.0  
SR 0.754054 0.761601 0.746659 907.0  
macro avg 0.740159 0.741148 0.739265 4026.0  
micro avg 0.748310 0.748310 0.748310 4026.0  
weighted avg 0.748182 0.748152 0.748310 4026.0  
The result of Model Number:Dataset Number:Featuregroup Number:Rescale of 81 : 1 : 9 :  
1

f1-score precision recall support  
AFIB 0.679032 0.683096 0.675051 204.0  
GSVT 0.697121 0.695049 0.699210 300.0  
SB 0.707796 0.706929 0.708668 892.0  
SR 0.702636 0.703465 0.701815 681.0  
macro avg 0.696646 0.697135 0.696186 2077.0  
micro avg 0.701753 0.701753 0.701753 2077.0  
weighted avg 0.701737 0.701736 0.701753 2077.0  
The result of Model Number:Dataset Number:Featuregroup Number:Rescale of 81 : 1 :  
10 : 0

f1-score precision recall support  
AFIB 0.655458 0.635867 0.698889 875.0  
GSVT 0.561303 0.549011 0.574365 691.0  
SB 0.744501 0.738435 0.750865 1553.0

SR 0.698449 0.727774 0.672708 907.0  
macro avg 0.664928 0.662772 0.674207 4026.0  
micro avg 0.691668 0.691668 0.691668 4026.0  
weighted avg 0.683331 0.681230 0.691668 4026.0  
The result of Model Number:Dataset Number:Featuregroup Number:Rescale of 81 : 1 :

10 : 1

f1-score precision recall support

AFIB 0.709986 0.724290 0.696691 204.0  
GSVT 0.732767 0.726882 0.738890 300.0  
SB 0.748631 0.747877 0.749386 892.0  
SR 0.741807 0.741381 0.742242 681.0  
macro avg 0.733298 0.735107 0.731802 2077.0  
micro avg 0.740352 0.740352 0.740352 2077.0  
weighted avg 0.740306 0.740398 0.740352 2077.0

The result of Model Number:Dataset Number:Featuregroup Number:Rescale of 82 : 0 : 0 :  
0

f1-score precision recall support

AFIB 0.639876 0.652156 0.628086 875.0  
GSVT 0.682087 0.683128 0.681093 691.0  
SB 0.742706 0.739442 0.746004 1553.0  
SR 0.701834 0.694204 0.709705 907.0  
macro avg 0.691626 0.692233 0.691222 4026.0  
micro avg 0.701057 0.701057 0.701057 4026.0  
weighted avg 0.700745 0.700615 0.701057 4026.0

The result of Model Number:Dataset Number:Featuregroup Number:Rescale of 82 : 0 : 0 :  
1

f1-score precision recall support

AFIB 0.699826 0.692093 0.707747 875.0  
GSVT 0.712435 0.716822 0.708114 691.0  
SB 0.758251 0.756989 0.759520 1553.0  
SR 0.739788 0.746705 0.733016 907.0  
macro avg 0.727575 0.728152 0.727099 4026.0  
micro avg 0.733474 0.733474 0.733474 4026.0  
weighted avg 0.733530 0.733674 0.733474 4026.0

The result of Model Number:Dataset Number:Featuregroup Number:Rescale of 82 : 0 : 1 :  
0

f1-score precision recall support

AFIB 0.755237 0.749422 0.761201 875.0  
GSVT 0.765042 0.768594 0.761690 691.0  
SB 0.819850 0.815488 0.824275 1553.0  
SR 0.795694 0.806881 0.784901 907.0  
macro avg 0.783956 0.785096 0.783017 4026.0  
micro avg 0.790955 0.790955 0.790955 4026.0  
weighted avg 0.790958 0.791142 0.790955 4026.0

The result of Model Number:Dataset Number:Featuregroup Number:Rescale of 82 : 0 : 1 : 1

|              | f1-score | precision | recall   | support |
|--------------|----------|-----------|----------|---------|
| AFIB         | 0.805771 | 0.800325  | 0.811401 | 875.0   |
| GSVT         | 0.825429 | 0.825758  | 0.825207 | 691.0   |
| SB           | 0.876850 | 0.874613  | 0.879109 | 1553.0  |
| SR           | 0.852975 | 0.862505  | 0.843665 | 907.0   |
| macro avg    | 0.840256 | 0.840800  | 0.839845 | 4026.0  |
| micro avg    | 0.847157 | 0.847157  | 0.847157 | 4026.0  |
| weighted avg | 0.847198 | 0.847355  | 0.847157 | 4026.0  |

The result of Model Number:Dataset Number:Featuregroup Number:Rescale of 82 : 0 : 2 : 0

|              | f1-score | precision | recall   | support |
|--------------|----------|-----------|----------|---------|
| AFIB         | 0.811418 | 0.790654  | 0.833377 | 875.0   |
| GSVT         | 0.767040 | 0.810514  | 0.728171 | 691.0   |
| SB           | 0.813331 | 0.748460  | 0.890535 | 1553.0  |
| SR           | 0.649714 | 0.789163  | 0.552265 | 907.0   |
| macro avg    | 0.760376 | 0.784698  | 0.751087 | 4026.0  |
| micro avg    | 0.774038 | 0.774038  | 0.774038 | 4026.0  |
| weighted avg | 0.768110 | 0.777451  | 0.774038 | 4026.0  |

The result of Model Number:Dataset Number:Featuregroup Number:Rescale of 82 : 0 : 2 : 1

|              | f1-score | precision | recall   | support |
|--------------|----------|-----------|----------|---------|
| AFIB         | 0.681618 | 0.706782  | 0.658247 | 204.0   |
| GSVT         | 0.696187 | 0.689041  | 0.703589 | 300.0   |
| SB           | 0.715254 | 0.711919  | 0.718622 | 892.0   |
| SR           | 0.704102 | 0.704543  | 0.703685 | 681.0   |
| macro avg    | 0.699290 | 0.703071  | 0.696036 | 2077.0  |
| micro avg    | 0.705623 | 0.705623  | 0.705623 | 2077.0  |
| weighted avg | 0.705540 | 0.705692  | 0.705623 | 2077.0  |

The result of Model Number:Dataset Number:Featuregroup Number:Rescale of 82 : 0 : 3 : 0

|              | f1-score | precision | recall   | support |
|--------------|----------|-----------|----------|---------|
| AFIB         | 0.811655 | 0.799433  | 0.831013 | 875.0   |
| GSVT         | 0.774984 | 0.772728  | 0.781595 | 691.0   |
| SB           | 0.827583 | 0.771175  | 0.899776 | 1553.0  |
| SR           | 0.613042 | 0.819455  | 0.507979 | 907.0   |
| macro avg    | 0.756816 | 0.790698  | 0.755091 | 4026.0  |
| micro avg    | 0.776281 | 0.776281  | 0.776281 | 4026.0  |
| weighted avg | 0.766760 | 0.788460  | 0.776281 | 4026.0  |

The result of Model Number:Dataset Number:Featuregroup Number:Rescale of 82 : 0 : 3 : 1

|      | f1-score | precision | recall   | support |
|------|----------|-----------|----------|---------|
| AFIB | 0.761403 | 0.758307  | 0.764544 | 875.0   |

GSVT 0.772533 0.777203 0.767948 691.0  
SB 0.814781 0.813789 0.815778 1553.0  
SR 0.797783 0.799047 0.796547 907.0  
macro avg 0.786625 0.787086 0.786204 4026.0  
micro avg 0.792101 0.792101 0.792101 4026.0  
weighted avg 0.792099 0.792130 0.792101 4026.0  
The result of Model Number:Dataset Number:Featuregroup Number:Rescale of 82 : 0 : 4 :  
0

f1-score precision recall support

AFIB 0.724245 0.727574 0.720982 875.0  
GSVT 0.694141 0.698323 0.690032 691.0  
SB 0.744580 0.711391 0.781055 1553.0  
SR 0.636779 0.693217 0.588967 907.0  
macro avg 0.699936 0.707626 0.695259 4026.0  
micro avg 0.709101 0.709101 0.709101 4026.0  
weighted avg 0.707217 0.708571 0.709101 4026.0  
The result of Model Number:Dataset Number:Featuregroup Number:Rescale of 82 : 0 : 4 :  
1

f1-score precision recall support

AFIB 0.855184 0.863928 0.846687 875.0  
GSVT 0.854927 0.841719 0.868656 691.0  
SB 0.901833 0.896448 0.907292 1553.0  
SR 0.877964 0.889715 0.866545 907.0  
macro avg 0.872477 0.872953 0.872295 4026.0  
micro avg 0.878309 0.878309 0.878309 4026.0  
weighted avg 0.878266 0.878470 0.878309 4026.0  
The result of Model Number:Dataset Number:Featuregroup Number:Rescale of 82 : 0 : 5 :  
0

f1-score precision recall support

AFIB 0.742720 0.740573 0.744948 875.0  
GSVT 0.756485 0.755870 0.757154 691.0  
SB 0.803497 0.800169 0.806860 1553.0  
SR 0.779375 0.787938 0.771039 907.0  
macro avg 0.770520 0.771137 0.770000 4026.0  
micro avg 0.776803 0.776803 0.776803 4026.0  
weighted avg 0.776785 0.776858 0.776803 4026.0  
The result of Model Number:Dataset Number:Featuregroup Number:Rescale of 82 : 0 : 5 :  
1

f1-score precision recall support

AFIB 0.770975 0.782347 0.760012 204.0  
GSVT 0.789901 0.786801 0.793051 300.0  
SB 0.807444 0.805825 0.809073 892.0  
SR 0.801717 0.801838 0.801603 681.0  
macro avg 0.792509 0.794203 0.790935 2077.0

micro avg 0.799491 0.799491 0.799491 2077.0  
weighted avg 0.799450 0.799464 0.799491 2077.0  
The result of Model Number:Dataset Number:Featuregroup Number:Rescale of 82 : 0 : 6 :  
0

|              | f1-score | precision | recall   | support |
|--------------|----------|-----------|----------|---------|
| AFIB         | 0.754402 | 0.837232  | 0.686667 | 204.0   |
| GSVT         | 0.880867 | 0.869854  | 0.892334 | 300.0   |
| SB           | 0.937199 | 0.932416  | 0.942031 | 892.0   |
| SR           | 0.915244 | 0.902448  | 0.928412 | 681.0   |
| macro avg    | 0.871928 | 0.885488  | 0.862361 | 2077.0  |
| micro avg    | 0.905306 | 0.905306  | 0.905306 | 2077.0  |
| weighted avg | 0.903909 | 0.904205  | 0.905306 | 2077.0  |

The result of Model Number:Dataset Number:Featuregroup Number:Rescale of 82 : 0 : 6 :  
1

|              | f1-score | precision | recall   | support |
|--------------|----------|-----------|----------|---------|
| AFIB         | 0.676613 | 0.679692  | 0.673603 | 875.0   |
| GSVT         | 0.679901 | 0.673124  | 0.686873 | 691.0   |
| SB           | 0.716616 | 0.708808  | 0.724600 | 1553.0  |
| SR           | 0.685366 | 0.701592  | 0.669877 | 907.0   |
| macro avg    | 0.689624 | 0.690804  | 0.688738 | 4026.0  |
| micro avg    | 0.694713 | 0.694713  | 0.694713 | 4026.0  |
| weighted avg | 0.694580 | 0.694729  | 0.694713 | 4026.0  |

The result of Model Number:Dataset Number:Featuregroup Number:Rescale of 82 : 0 : 7 :  
0

|              | f1-score | precision | recall   | support |
|--------------|----------|-----------|----------|---------|
| AFIB         | 0.880998 | 0.881784  | 0.880304 | 875.0   |
| GSVT         | 0.897135 | 0.899489  | 0.894945 | 691.0   |
| SB           | 0.952321 | 0.945980  | 0.958757 | 1553.0  |
| SR           | 0.933766 | 0.942291  | 0.925427 | 907.0   |
| macro avg    | 0.916055 | 0.917386  | 0.914858 | 4026.0  |
| micro avg    | 0.923245 | 0.923245  | 0.923245 | 4026.0  |
| weighted avg | 0.923168 | 0.923217  | 0.923245 | 4026.0  |

The result of Model Number:Dataset Number:Featuregroup Number:Rescale of 82 : 0 : 7 :  
1

|              | f1-score | precision | recall   | support |
|--------------|----------|-----------|----------|---------|
| AFIB         | 0.679683 | 0.697644  | 0.662691 | 204.0   |
| GSVT         | 0.698323 | 0.692522  | 0.704350 | 300.0   |
| SB           | 0.717566 | 0.714933  | 0.720220 | 892.0   |
| SR           | 0.706455 | 0.707311  | 0.705620 | 681.0   |
| macro avg    | 0.700507 | 0.703102  | 0.698220 | 2077.0  |
| micro avg    | 0.707491 | 0.707491  | 0.707491 | 2077.0  |
| weighted avg | 0.707423 | 0.707499  | 0.707491 | 2077.0  |

The result of Model Number:Dataset Number:Featuregroup Number:Rescale of 82 : 0 : 8 :  
0



f1-score precision recall support  
AFIB 0.832991 0.831376 0.834720 875.0  
GSVT 0.848632 0.833784 0.864100 691.0  
SB 0.909125 0.896226 0.922410 1553.0  
SR 0.861181 0.899572 0.825970 907.0  
macro avg 0.862982 0.865239 0.861800 4026.0  
micro avg 0.871617 0.871617 0.871617 4026.0  
weighted avg 0.871394 0.872168 0.871617 4026.0  
The result of Model Number:Dataset Number:Featuregroup Number:Rescale of 82 : 0 : 8 :  
1

f1-score precision recall support  
AFIB 0.671589 0.663157 0.680433 875.0  
GSVT 0.623101 0.641967 0.607396 691.0  
SB 0.670867 0.621372 0.730705 1553.0  
SR 0.521621 0.638424 0.444797 907.0  
macro avg 0.621795 0.641230 0.615833 4026.0  
micro avg 0.634204 0.634204 0.634204 4026.0  
weighted avg 0.629203 0.637830 0.634204 4026.0  
The result of Model Number:Dataset Number:Featuregroup Number:Rescale of 82 : 0 : 9 :  
0

f1-score precision recall support  
AFIB 0.820997 0.826859 0.815364 204.0  
GSVT 0.849705 0.849157 0.850270 300.0  
SB 0.866706 0.864782 0.868646 892.0  
SR 0.858958 0.859997 0.857948 681.0  
macro avg 0.849091 0.850199 0.848057 2077.0  
micro avg 0.857251 0.857251 0.857251 2077.0  
weighted avg 0.857220 0.857232 0.857251 2077.0  
The result of Model Number:Dataset Number:Featuregroup Number:Rescale of 82 : 0 : 9 :  
1

f1-score precision recall support  
AFIB 0.860723 0.854096 0.867520 875.0  
GSVT 0.871898 0.875946 0.868078 691.0  
SB 0.934361 0.929390 0.939405 1553.0  
SR 0.906831 0.919581 0.894530 907.0  
macro avg 0.893453 0.894753 0.892383 4026.0  
micro avg 0.901430 0.901430 0.901430 4026.0  
weighted avg 0.901434 0.901643 0.901430 4026.0  
The result of Model Number:Dataset Number:Featuregroup Number:Rescale of 82 : 0 :  
10 : 0

f1-score precision recall support  
AFIB 0.798536 0.798487 0.798634 875.0  
GSVT 0.800264 0.795937 0.804652 691.0  
SB 0.838496 0.832916 0.844161 1553.0

SR 0.816231 0.829623 0.803294 907.0  
macro avg 0.813382 0.814241 0.812685 4026.0  
micro avg 0.818278 0.818278 0.818278 4026.0  
weighted avg 0.818233 0.818345 0.818278 4026.0  
The result of Model Number:Dataset Number:Featuregroup Number:Rescale of 82 : 0 :  
10 : 1

f1-score precision recall support  
AFIB 0.858490 0.875711 0.842103 204.0  
GSVT 0.878385 0.869255 0.887756 300.0  
SB 0.894631 0.891150 0.898141 892.0  
SR 0.885230 0.888923 0.881587 681.0  
macro avg 0.879184 0.881260 0.877397 2077.0  
micro avg 0.885709 0.885709 0.885709 2077.0  
weighted avg 0.885652 0.885741 0.885709 2077.0  
The result of Model Number:Dataset Number:Featuregroup Number:Rescale of 82 : 1 : 0 :  
0

f1-score precision recall support  
AFIB 0.854421 0.854827 0.854137 875.0  
GSVT 0.876549 0.868962 0.884300 691.0  
SB 0.936157 0.929335 0.943089 1553.0  
SR 0.896163 0.913978 0.879076 907.0  
macro avg 0.890823 0.891776 0.890150 4026.0  
micro avg 0.899245 0.899245 0.899245 4026.0  
weighted avg 0.899152 0.899320 0.899245 4026.0  
The result of Model Number:Dataset Number:Featuregroup Number:Rescale of 82 : 1 : 0 :  
1

f1-score precision recall support  
AFIB 0.793507 0.805537 0.781850 204.0  
GSVT 0.806266 0.799469 0.813222 300.0  
SB 0.824150 0.821492 0.826828 892.0  
SR 0.815303 0.818332 0.812319 681.0  
macro avg 0.809807 0.811207 0.808555 2077.0  
micro avg 0.815688 0.815688 0.815688 2077.0  
weighted avg 0.815657 0.815708 0.815688 2077.0  
The result of Model Number:Dataset Number:Featuregroup Number:Rescale of 82 : 1 : 1 :  
0

f1-score precision recall support  
AFIB 0.664181 0.688806 0.641351 204.0  
GSVT 0.684079 0.675526 0.692939 300.0  
SB 0.701426 0.695026 0.707951 892.0  
SR 0.682985 0.688285 0.677772 681.0  
macro avg 0.683168 0.686911 0.680003 2077.0  
micro avg 0.689346 0.689346 0.689346 2077.0  
weighted avg 0.689216 0.689388 0.689346 2077.0

The result of Model Number:Dataset Number:Featuregroup Number:Rescale of 82 : 1 : 1 : 1

|              | f1-score | precision | recall   | support |
|--------------|----------|-----------|----------|---------|
| AFIB         | 0.868784 | 0.858648  | 0.881428 | 875.0   |
| GSVT         | 0.893926 | 0.883091  | 0.905751 | 691.0   |
| SB           | 0.907400 | 0.872374  | 0.958777 | 1553.0  |
| SR           | 0.720523 | 0.758530  | 0.686186 | 907.0   |
| macro avg    | 0.847658 | 0.843161  | 0.858035 | 4026.0  |
| micro avg    | 0.871454 | 0.871454  | 0.871454 | 4026.0  |
| weighted avg | 0.854594 | 0.845583  | 0.871454 | 4026.0  |

The result of Model Number:Dataset Number:Featuregroup Number:Rescale of 82 : 1 : 2 : 0

|              | f1-score | precision | recall   | support |
|--------------|----------|-----------|----------|---------|
| AFIB         | 0.695424 | 0.701489  | 0.689636 | 204.0   |
| GSVT         | 0.719474 | 0.718299  | 0.720670 | 300.0   |
| SB           | 0.734767 | 0.732974  | 0.736576 | 892.0   |
| SR           | 0.728030 | 0.729128  | 0.726961 | 681.0   |
| macro avg    | 0.719424 | 0.720472  | 0.718461 | 2077.0  |
| micro avg    | 0.726516 | 0.726516  | 0.726516 | 2077.0  |
| weighted avg | 0.726485 | 0.726501  | 0.726516 | 2077.0  |

The result of Model Number:Dataset Number:Featuregroup Number:Rescale of 82 : 1 : 2 : 1

|              | f1-score | precision | recall   | support |
|--------------|----------|-----------|----------|---------|
| AFIB         | 0.675703 | 0.677009  | 0.674453 | 875.0   |
| GSVT         | 0.654642 | 0.651767  | 0.657583 | 691.0   |
| SB           | 0.684023 | 0.642448  | 0.731370 | 1553.0  |
| SR           | 0.550543 | 0.637919  | 0.484350 | 907.0   |
| macro avg    | 0.641228 | 0.652286  | 0.636939 | 4026.0  |
| micro avg    | 0.650685 | 0.650685  | 0.650685 | 4026.0  |
| weighted avg | 0.647101 | 0.650538  | 0.650685 | 4026.0  |

The result of Model Number:Dataset Number:Featuregroup Number:Rescale of 82 : 1 : 3 : 0

|              | f1-score | precision | recall   | support |
|--------------|----------|-----------|----------|---------|
| AFIB         | 0.694870 | 0.696803  | 0.692984 | 875.0   |
| GSVT         | 0.710787 | 0.710590  | 0.710992 | 691.0   |
| SB           | 0.757011 | 0.749896  | 0.764271 | 1553.0  |
| SR           | 0.736952 | 0.747580  | 0.726631 | 907.0   |
| macro avg    | 0.724905 | 0.726217  | 0.723719 | 4026.0  |
| micro avg    | 0.731153 | 0.731153  | 0.731153 | 4026.0  |
| weighted avg | 0.731053 | 0.731089  | 0.731153 | 4026.0  |

The result of Model Number:Dataset Number:Featuregroup Number:Rescale of 82 : 1 : 3 : 1

|      | f1-score | precision | recall   | support |
|------|----------|-----------|----------|---------|
| AFIB | 0.679003 | 0.682716  | 0.675353 | 875.0   |

GSVT 0.675767 0.670069 0.681631 691.0  
SB 0.710738 0.704007 0.717602 1553.0  
SR 0.684287 0.697051 0.671991 907.0  
macro avg 0.687449 0.688461 0.686644 4026.0  
micro avg 0.691970 0.691970 0.691970 4026.0  
weighted avg 0.691880 0.691988 0.691970 4026.0  
The result of Model Number:Dataset Number:Featuregroup Number:Rescale of 82 : 1 : 4 :  
0

f1-score precision recall support  
AFIB 0.789550 0.809241 0.770855 875.0  
GSVT 0.839943 0.843163 0.836787 691.0  
SB 0.909588 0.905184 0.914038 1553.0  
SR 0.861885 0.847519 0.876802 907.0  
macro avg 0.850242 0.851277 0.849620 4026.0  
micro avg 0.861271 0.861271 0.861271 4026.0  
weighted avg 0.860799 0.860696 0.861271 4026.0  
The result of Model Number:Dataset Number:Featuregroup Number:Rescale of 82 : 1 : 4 :  
1

f1-score precision recall support  
AFIB 0.862693 0.877671 0.848327 204.0  
GSVT 0.879693 0.877090 0.882330 300.0  
SB 0.890066 0.886900 0.893259 892.0  
SR 0.882830 0.883751 0.881930 681.0  
macro avg 0.878820 0.881353 0.876461 2077.0  
micro avg 0.883553 0.883553 0.883553 2077.0  
weighted avg 0.883507 0.883544 0.883553 2077.0  
The result of Model Number:Dataset Number:Featuregroup Number:Rescale of 82 : 1 : 5 :  
0

f1-score precision recall support  
AFIB 0.810675 0.805374 0.816117 875.0  
GSVT 0.834770 0.841873 0.827898 691.0  
SB 0.888725 0.886790 0.890671 1553.0  
SR 0.867067 0.870548 0.863626 907.0  
macro avg 0.850309 0.851146 0.849578 4026.0  
micro avg 0.857601 0.857601 0.857601 4026.0  
weighted avg 0.857622 0.857727 0.857601 4026.0  
The result of Model Number:Dataset Number:Featuregroup Number:Rescale of 82 : 1 : 5 :  
1

f1-score precision recall support  
AFIB 0.564179 0.614585 0.595785 204.0  
GSVT 0.766311 0.753785 0.779526 300.0  
SB 0.652368 0.647399 0.657462 892.0  
SR 0.797739 0.788713 0.806998 681.0  
macro avg 0.695149 0.701120 0.709943 2077.0

micro avg 0.718065 0.718065 0.718065 2077.0  
weighted avg 0.707828 0.705876 0.718065 2077.0  
The result of Model Number:Dataset Number:Featuregroup Number:Rescale of 82 : 1 : 6 :  
0

|              | f1-score | precision | recall   | support |
|--------------|----------|-----------|----------|---------|
| AFIB         | 0.858499 | 0.868536  | 0.848856 | 204.0   |
| GSVT         | 0.882116 | 0.878060  | 0.886233 | 300.0   |
| SB           | 0.894605 | 0.891823  | 0.897411 | 892.0   |
| SR           | 0.886900 | 0.889414  | 0.884439 | 681.0   |
| macro avg    | 0.880530 | 0.881958  | 0.879235 | 2077.0  |
| micro avg    | 0.886774 | 0.886774  | 0.886774 | 2077.0  |
| weighted avg | 0.886729 | 0.886758  | 0.886774 | 2077.0  |

The result of Model Number:Dataset Number:Featuregroup Number:Rescale of 82 : 1 : 6 :  
1

|              | f1-score | precision | recall   | support |
|--------------|----------|-----------|----------|---------|
| AFIB         | 0.585041 | 0.645176  | 0.535519 | 204.0   |
| GSVT         | 0.696181 | 0.686773  | 0.705920 | 300.0   |
| SB           | 0.741384 | 0.738419  | 0.744375 | 892.0   |
| SR           | 0.721261 | 0.711511  | 0.731313 | 681.0   |
| macro avg    | 0.685967 | 0.695470  | 0.679282 | 2077.0  |
| micro avg    | 0.714025 | 0.714025  | 0.714025 | 2077.0  |
| weighted avg | 0.712901 | 0.712979  | 0.714025 | 2077.0  |

The result of Model Number:Dataset Number:Featuregroup Number:Rescale of 82 : 1 : 7 :  
0

|              | f1-score | precision | recall   | support |
|--------------|----------|-----------|----------|---------|
| AFIB         | 0.826773 | 0.866466  | 0.790722 | 204.0   |
| GSVT         | 0.862734 | 0.855408  | 0.870210 | 300.0   |
| SB           | 0.876292 | 0.869910  | 0.882774 | 892.0   |
| SR           | 0.867075 | 0.867476  | 0.866699 | 681.0   |
| macro avg    | 0.858218 | 0.864815  | 0.852601 | 2077.0  |
| micro avg    | 0.866647 | 0.866647  | 0.866647 | 2077.0  |
| weighted avg | 0.866448 | 0.866679  | 0.866647 | 2077.0  |

The result of Model Number:Dataset Number:Featuregroup Number:Rescale of 82 : 1 : 7 :  
1

|              | f1-score | precision | recall   | support |
|--------------|----------|-----------|----------|---------|
| AFIB         | 0.822404 | 0.815131  | 0.829843 | 875.0   |
| GSVT         | 0.747708 | 0.724098  | 0.831840 | 691.0   |
| SB           | 0.674099 | 0.647228  | 0.716121 | 1553.0  |
| SR           | 0.694757 | 0.701946  | 0.687759 | 907.0   |
| macro avg    | 0.734742 | 0.722101  | 0.766391 | 4026.0  |
| micro avg    | 0.754309 | 0.754309  | 0.754309 | 4026.0  |
| weighted avg | 0.723619 | 0.709240  | 0.754309 | 4026.0  |

The result of Model Number:Dataset Number:Featuregroup Number:Rescale of 82 : 1 : 8 :  
0

f1-score precision recall support  
AFIB 0.852612 0.873072 0.833477 204.0  
GSVT 0.882929 0.877811 0.888213 300.0  
SB 0.901786 0.898478 0.905121 892.0  
SR 0.893949 0.894612 0.893297 681.0  
macro avg 0.882819 0.885993 0.880027 2077.0  
micro avg 0.891765 0.891765 0.891765 2077.0  
weighted avg 0.891663 0.891730 0.891765 2077.0  
The result of Model Number:Dataset Number:Featuregroup Number:Rescale of 82 : 1 : 8 :  
1

f1-score precision recall support  
AFIB 0.643984 0.701520 0.680061 204.0  
GSVT 0.874709 0.860410 0.889793 300.0  
SB 0.744647 0.738975 0.750462 892.0  
SR 0.910582 0.900279 0.921151 681.0  
macro avg 0.793480 0.800296 0.810367 2077.0  
micro avg 0.819637 0.819637 0.819637 2077.0  
weighted avg 0.807952 0.805724 0.819637 2077.0  
The result of Model Number:Dataset Number:Featuregroup Number:Rescale of 82 : 1 : 9 :  
0

f1-score precision recall support  
AFIB 0.759402 0.833850 0.697900 204.0  
GSVT 0.890979 0.878970 0.903464 300.0  
SB 0.945941 0.942786 0.949122 892.0  
SR 0.921358 0.909005 0.934074 681.0  
macro avg 0.879420 0.891153 0.871140 2077.0  
micro avg 0.912919 0.912919 0.912919 2077.0  
weighted avg 0.911621 0.911793 0.912919 2077.0  
The result of Model Number:Dataset Number:Featuregroup Number:Rescale of 82 : 1 : 9 :  
1

f1-score precision recall support  
AFIB 0.709564 0.738204 0.683120 204.0  
GSVT 0.735969 0.724014 0.748453 300.0  
SB 0.755009 0.748939 0.761188 892.0  
SR 0.734696 0.739987 0.729520 681.0  
macro avg 0.733810 0.737786 0.730570 2077.0  
micro avg 0.741297 0.741297 0.741297 2077.0  
weighted avg 0.741135 0.741349 0.741297 2077.0  
The result of Model Number:Dataset Number:Featuregroup Number:Rescale of 82 : 1 :  
10 : 0

f1-score precision recall support  
AFIB 0.765251 0.764550 0.766045 875.0  
GSVT 0.780936 0.779422 0.782539 691.0  
SB 0.828675 0.826830 0.830542 1553.0

SR 0.806057 0.811316 0.800896 907.0  
macro avg 0.795230 0.795529 0.795005 4026.0  
micro avg 0.801606 0.801606 0.801606 4026.0  
weighted avg 0.801602 0.801662 0.801606 4026.0  
The result of Model Number:Dataset Number:Featuregroup Number:Rescale of 82 : 1 : 10 : 1

f1-score precision recall support  
AFIB 0.626580 0.690218 0.574288 204.0  
GSVT 0.578643 0.618657 0.543762 300.0  
SB 0.629971 0.588628 0.677570 892.0  
SR 0.545250 0.573912 0.519465 681.0  
macro avg 0.595111 0.617854 0.578771 2077.0  
micro avg 0.596259 0.596259 0.596259 2077.0  
weighted avg 0.594446 0.598118 0.596259 2077.0

The result of Model Number:Dataset Number:Featuregroup Number:Rescale of 83 : 0 : 0 : 0

f1-score precision recall support  
AFIB 0.861904 0.866300 0.857579 875.0  
GSVT 0.873798 0.869252 0.878468 691.0  
SB 0.915877 0.915059 0.916704 1553.0  
SR 0.899012 0.899746 0.898318 907.0  
macro avg 0.887648 0.887589 0.887767 4026.0  
micro avg 0.893149 0.893149 0.893149 4026.0  
weighted avg 0.893125 0.893150 0.893149 4026.0

The result of Model Number:Dataset Number:Featuregroup Number:Rescale of 83 : 0 : 0 : 1

f1-score precision recall support  
AFIB 0.869831 0.904939 0.837414 204.0  
GSVT 0.902200 0.887544 0.917503 300.0  
SB 0.925540 0.918099 0.933114 892.0  
SR 0.900640 0.907125 0.894294 681.0  
macro avg 0.899553 0.904427 0.895581 2077.0  
micro avg 0.908732 0.908732 0.908732 2077.0  
weighted avg 0.908533 0.908795 0.908732 2077.0

The result of Model Number:Dataset Number:Featuregroup Number:Rescale of 83 : 0 : 1 : 0

f1-score precision recall support  
AFIB 0.727072 0.787767 0.676509 204.0  
GSVT 0.779869 0.770062 0.790246 300.0  
SB 0.799778 0.788573 0.811398 892.0  
SR 0.777961 0.781606 0.774730 681.0  
macro avg 0.771170 0.782002 0.763221 2077.0  
micro avg 0.783072 0.783072 0.783072 2077.0  
weighted avg 0.782608 0.783536 0.783072 2077.0

The result of Model Number:Dataset Number:Featuregroup Number:Rescale of 83 : 0 : 1 :  
1

|              | f1-score | precision | recall   | support |
|--------------|----------|-----------|----------|---------|
| AFIB         | 0.672580 | 0.675783  | 0.669437 | 875.0   |
| GSVT         | 0.680889 | 0.668515  | 0.693799 | 691.0   |
| SB           | 0.720432 | 0.717673  | 0.723214 | 1553.0  |
| SR           | 0.699138 | 0.711104  | 0.687578 | 907.0   |
| macro avg    | 0.693259 | 0.693269  | 0.693507 | 4026.0  |
| micro avg    | 0.698449 | 0.698449  | 0.698449 | 4026.0  |
| weighted avg | 0.698447 | 0.698652  | 0.698449 | 4026.0  |

The result of Model Number:Dataset Number:Featuregroup Number:Rescale of 83 : 0 : 2 :  
0

|              | f1-score | precision | recall   | support |
|--------------|----------|-----------|----------|---------|
| AFIB         | 0.775864 | 0.792138  | 0.760266 | 204.0   |
| GSVT         | 0.793862 | 0.789165  | 0.798624 | 300.0   |
| SB           | 0.813216 | 0.811312  | 0.815130 | 892.0   |
| SR           | 0.806347 | 0.806115  | 0.806586 | 681.0   |
| macro avg    | 0.797322 | 0.799683  | 0.795152 | 2077.0  |
| micro avg    | 0.804556 | 0.804556  | 0.804556 | 2077.0  |
| weighted avg | 0.804500 | 0.804526  | 0.804556 | 2077.0  |

The result of Model Number:Dataset Number:Featuregroup Number:Rescale of 83 : 0 : 2 :  
1

|              | f1-score | precision | recall   | support |
|--------------|----------|-----------|----------|---------|
| AFIB         | 0.821042 | 0.808771  | 0.833722 | 875.0   |
| GSVT         | 0.836784 | 0.843941  | 0.829761 | 691.0   |
| SB           | 0.894085 | 0.891006  | 0.897190 | 1553.0  |
| SR           | 0.867915 | 0.880860  | 0.855375 | 907.0   |
| macro avg    | 0.854957 | 0.856144  | 0.854012 | 4026.0  |
| micro avg    | 0.862403 | 0.862403  | 0.862403 | 4026.0  |
| weighted avg | 0.862479 | 0.862769  | 0.862403 | 4026.0  |

The result of Model Number:Dataset Number:Featuregroup Number:Rescale of 83 : 0 : 3 :  
0

|              | f1-score | precision | recall   | support |
|--------------|----------|-----------|----------|---------|
| AFIB         | 0.720960 | 0.781146  | 0.670823 | 204.0   |
| GSVT         | 0.773314 | 0.763590  | 0.783604 | 300.0   |
| SB           | 0.793055 | 0.781945  | 0.804578 | 892.0   |
| SR           | 0.771422 | 0.775036  | 0.768218 | 681.0   |
| macro avg    | 0.764688 | 0.775429  | 0.756806 | 2077.0  |
| micro avg    | 0.776490 | 0.776490  | 0.776490 | 2077.0  |
| weighted avg | 0.776030 | 0.776950  | 0.776490 | 2077.0  |

The result of Model Number:Dataset Number:Featuregroup Number:Rescale of 83 : 0 : 3 :  
1

|      | f1-score | precision | recall   | support |
|------|----------|-----------|----------|---------|
| AFIB | 0.857322 | 0.876242  | 0.839265 | 204.0   |



GSVT 0.876058 0.861530 0.891189 300.0  
SB 0.892892 0.885908 0.899997 892.0  
SR 0.871222 0.881708 0.860985 681.0  
macro avg 0.874373 0.876347 0.872859 2077.0  
micro avg 0.879968 0.879968 0.879968 2077.0  
weighted avg 0.879862 0.880061 0.879968 2077.0  
The result of Model Number:Dataset Number:Featuregroup Number:Rescale of 83 : 0 : 4 :  
0

f1-score precision recall support  
AFIB 0.884972 0.922900 0.850374 204.0  
GSVT 0.914710 0.900890 0.929019 300.0  
SB 0.932853 0.923627 0.942267 892.0  
SR 0.907579 0.915344 0.899979 681.0  
macro avg 0.910028 0.915690 0.905410 2077.0  
micro avg 0.917463 0.917463 0.917463 2077.0  
weighted avg 0.917243 0.917556 0.917463 2077.0  
The result of Model Number:Dataset Number:Featuregroup Number:Rescale of 83 : 0 : 4 :  
1

f1-score precision recall support  
AFIB 0.775822 0.813070 0.741993 204.0  
GSVT 0.809568 0.802693 0.816583 300.0  
SB 0.822290 0.816301 0.828372 892.0  
SR 0.813640 0.814017 0.813288 681.0  
macro avg 0.805330 0.811520 0.800059 2077.0  
micro avg 0.813239 0.813239 0.813239 2077.0  
weighted avg 0.813052 0.813270 0.813239 2077.0  
The result of Model Number:Dataset Number:Featuregroup Number:Rescale of 83 : 0 : 5 :  
0

f1-score precision recall support  
AFIB 0.806399 0.787604 0.826242 875.0  
GSVT 0.774114 0.782624 0.765840 691.0  
SB 0.814632 0.762028 0.875055 1553.0  
SR 0.651985 0.782909 0.558925 907.0  
macro avg 0.761783 0.778791 0.756516 4026.0  
micro avg 0.774482 0.774482 0.774482 4026.0  
weighted avg 0.769246 0.775826 0.774482 4026.0  
The result of Model Number:Dataset Number:Featuregroup Number:Rescale of 83 : 0 : 5 :  
1

f1-score precision recall support  
AFIB 0.671284 0.674025 0.668586 875.0  
GSVT 0.625095 0.652682 0.599847 691.0  
SB 0.671315 0.608124 0.749170 1553.0  
SR 0.506396 0.630257 0.423392 907.0  
macro avg 0.618522 0.641272 0.610249 4026.0

micro avg 0.632634 0.632634 0.632634 4026.0  
weighted avg 0.626221 0.635081 0.632634 4026.0  
The result of Model Number:Dataset Number:Featuregroup Number:Rescale of 83 : 0 : 6 :  
0

|              | f1-score | precision | recall   | support |
|--------------|----------|-----------|----------|---------|
| AFIB         | 0.675453 | 0.691510  | 0.660201 | 204.0   |
| GSVT         | 0.692989 | 0.690314  | 0.695756 | 300.0   |
| SB           | 0.710161 | 0.708576  | 0.711753 | 892.0   |
| SR           | 0.701226 | 0.699815  | 0.702668 | 681.0   |
| macro avg    | 0.694957 | 0.697554  | 0.692594 | 2077.0  |
| micro avg    | 0.701400 | 0.701400  | 0.701400 | 2077.0  |
| weighted avg | 0.701342 | 0.701390  | 0.701400 | 2077.0  |

The result of Model Number:Dataset Number:Featuregroup Number:Rescale of 83 : 0 : 6 :  
1

|              | f1-score | precision | recall   | support |
|--------------|----------|-----------|----------|---------|
| AFIB         | 0.899596 | 0.907797  | 0.891659 | 204.0   |
| GSVT         | 0.923072 | 0.920050  | 0.926143 | 300.0   |
| SB           | 0.939947 | 0.939320  | 0.940577 | 892.0   |
| SR           | 0.931680 | 0.931412  | 0.931961 | 681.0   |
| macro avg    | 0.923574 | 0.924645  | 0.922585 | 2077.0  |
| micro avg    | 0.930863 | 0.930863  | 0.930863 | 2077.0  |
| weighted avg | 0.930836 | 0.930848  | 0.930863 | 2077.0  |

The result of Model Number:Dataset Number:Featuregroup Number:Rescale of 83 : 0 : 7 :  
0

|              | f1-score | precision | recall   | support |
|--------------|----------|-----------|----------|---------|
| AFIB         | 0.865668 | 0.868906  | 0.862822 | 875.0   |
| GSVT         | 0.885153 | 0.893693  | 0.876953 | 691.0   |
| SB           | 0.941195 | 0.931323  | 0.951351 | 1553.0  |
| SR           | 0.908603 | 0.916599  | 0.901057 | 907.0   |
| macro avg    | 0.900155 | 0.902630  | 0.898046 | 4026.0  |
| micro avg    | 0.908010 | 0.908010  | 0.908010 | 4026.0  |
| weighted avg | 0.907819 | 0.907982  | 0.908010 | 4026.0  |

The result of Model Number:Dataset Number:Featuregroup Number:Rescale of 83 : 0 : 7 :  
1

|              | f1-score | precision | recall   | support |
|--------------|----------|-----------|----------|---------|
| AFIB         | 0.778541 | 0.779594  | 0.777639 | 875.0   |
| GSVT         | 0.790666 | 0.790260  | 0.791103 | 691.0   |
| SB           | 0.825769 | 0.822815  | 0.828748 | 1553.0  |
| SR           | 0.805995 | 0.810513  | 0.801579 | 907.0   |
| macro avg    | 0.800243 | 0.800795  | 0.799767 | 4026.0  |
| micro avg    | 0.805058 | 0.805058  | 0.805058 | 4026.0  |
| weighted avg | 0.805025 | 0.805062  | 0.805058 | 4026.0  |

The result of Model Number:Dataset Number:Featuregroup Number:Rescale of 83 : 0 : 8 :  
0

f1-score precision recall support  
AFIB 0.780313 0.785976 0.774786 875.0  
GSVT 0.797429 0.790017 0.805041 691.0  
SB 0.857003 0.851829 0.862245 1553.0  
SR 0.828915 0.838171 0.819865 907.0  
macro avg 0.815915 0.816498 0.815485 4026.0  
micro avg 0.823871 0.823871 0.823871 4026.0  
weighted avg 0.823783 0.823831 0.823871 4026.0  
The result of Model Number:Dataset Number:Featuregroup Number:Rescale of 83 : 0 : 8 :  
1

f1-score precision recall support  
AFIB 0.576471 0.635724 0.527675 204.0  
GSVT 0.685983 0.676713 0.695579 300.0  
SB 0.730523 0.727602 0.733471 892.0  
SR 0.710696 0.701089 0.720600 681.0  
macro avg 0.675918 0.685282 0.669331 2077.0  
micro avg 0.703565 0.703565 0.703565 2077.0  
weighted avg 0.702458 0.702534 0.703565 2077.0  
The result of Model Number:Dataset Number:Featuregroup Number:Rescale of 83 : 0 : 9 :  
0

f1-score precision recall support  
AFIB 0.888832 0.888032 0.889720 875.0  
GSVT 0.904230 0.895951 0.912735 691.0  
SB 0.948882 0.940539 0.957375 1553.0  
SR 0.904210 0.926563 0.882988 907.0  
macro avg 0.911539 0.912771 0.910704 4026.0  
micro avg 0.918251 0.918251 0.918251 4026.0  
weighted avg 0.918103 0.918326 0.918251 4026.0  
The result of Model Number:Dataset Number:Featuregroup Number:Rescale of 83 : 0 : 9 :  
1

f1-score precision recall support  
AFIB 0.653952 0.646203 0.661944 875.0  
GSVT 0.663260 0.669672 0.657034 691.0  
SB 0.703940 0.701246 0.706659 1553.0  
SR 0.687528 0.695460 0.679795 907.0  
macro avg 0.677170 0.678145 0.676358 4026.0  
micro avg 0.682371 0.682371 0.682371 4026.0  
weighted avg 0.682396 0.682561 0.682371 4026.0  
The result of Model Number:Dataset Number:Featuregroup Number:Rescale of 83 : 0 :  
10 : 0

f1-score precision recall support  
AFIB 0.755166 0.832788 0.691244 204.0  
GSVT 0.898626 0.886481 0.911196 300.0  
SB 0.956972 0.953145 0.960834 892.0

SR 0.930998 0.918413 0.943973 681.0  
macro avg 0.885440 0.897707 0.876812 2077.0  
micro avg 0.921657 0.921657 0.921657 2077.0  
weighted avg 0.920207 0.920307 0.921657 2077.0  
The result of Model Number:Dataset Number:Featuregroup Number:Rescale of 83 : 0 :  
10 : 1

f1-score precision recall support  
AFIB 0.911765 0.930890 0.893435 204.0  
GSVT 0.932916 0.927396 0.938511 300.0  
SB 0.955660 0.953422 0.957909 892.0  
SR 0.947588 0.947315 0.947869 681.0  
macro avg 0.936982 0.939756 0.934431 2077.0  
micro avg 0.945483 0.945483 0.945483 2077.0  
weighted avg 0.945417 0.945447 0.945483 2077.0  
The result of Model Number:Dataset Number:Featuregroup Number:Rescale of 83 : 1 : 0 :  
0

f1-score precision recall support  
AFIB 0.871550 0.884354 0.859191 204.0  
GSVT 0.893632 0.886035 0.901379 300.0  
SB 0.909077 0.905440 0.912745 892.0  
SR 0.900086 0.904504 0.895721 681.0  
macro avg 0.893586 0.895083 0.892259 2077.0  
micro avg 0.900262 0.900262 0.900262 2077.0  
weighted avg 0.900212 0.900259 0.900262 2077.0  
The result of Model Number:Dataset Number:Featuregroup Number:Rescale of 83 : 1 : 0 :  
1

f1-score precision recall support  
AFIB 0.687352 0.689673 0.685071 875.0  
GSVT 0.685537 0.680708 0.690497 691.0  
SB 0.721311 0.714617 0.728137 1553.0  
SR 0.693888 0.707261 0.681047 907.0  
macro avg 0.697022 0.698065 0.696188 4026.0  
micro avg 0.701708 0.701708 0.701708 4026.0  
weighted avg 0.701613 0.701718 0.701708 4026.0  
The result of Model Number:Dataset Number:Featuregroup Number:Rescale of 83 : 1 : 1 :  
0

f1-score precision recall support  
AFIB 0.792384 0.817331 0.769108 204.0  
GSVT 0.752807 0.768887 0.737511 300.0  
SB 0.777289 0.750090 0.806564 892.0  
SR 0.709862 0.733853 0.687440 681.0  
macro avg 0.758085 0.767540 0.750156 2077.0  
micro avg 0.753853 0.753853 0.753853 2077.0  
weighted avg 0.753128 0.754086 0.753853 2077.0

The result of Model Number:Dataset Number:Featuregroup Number:Rescale of 83 : 1 : 1 : 1

|              | f1-score | precision | recall   | support |
|--------------|----------|-----------|----------|---------|
| AFIB         | 0.651283 | 0.650556  | 0.652032 | 875.0   |
| GSVT         | 0.663197 | 0.654902  | 0.671724 | 691.0   |
| SB           | 0.696684 | 0.691084  | 0.702382 | 1553.0  |
| SR           | 0.665602 | 0.683066  | 0.649019 | 907.0   |
| macro avg    | 0.669192 | 0.669902  | 0.668789 | 4026.0  |
| micro avg    | 0.674155 | 0.674155  | 0.674155 | 4026.0  |
| weighted avg | 0.674067 | 0.674259  | 0.674155 | 4026.0  |

The result of Model Number:Dataset Number:Featuregroup Number:Rescale of 83 : 1 : 2 : 0

|              | f1-score | precision | recall   | support |
|--------------|----------|-----------|----------|---------|
| AFIB         | 0.792113 | 0.799856  | 0.784703 | 875.0   |
| GSVT         | 0.786062 | 0.780098  | 0.792377 | 691.0   |
| SB           | 0.831743 | 0.823186  | 0.840554 | 1553.0  |
| SR           | 0.805342 | 0.818294  | 0.793022 | 907.0   |
| macro avg    | 0.803815 | 0.805359  | 0.802664 | 4026.0  |
| micro avg    | 0.809438 | 0.809438  | 0.809438 | 4026.0  |
| weighted avg | 0.809342 | 0.809618  | 0.809438 | 4026.0  |

The result of Model Number:Dataset Number:Featuregroup Number:Rescale of 83 : 1 : 2 : 1

|              | f1-score | precision | recall   | support |
|--------------|----------|-----------|----------|---------|
| AFIB         | 0.857686 | 0.861590  | 0.853871 | 875.0   |
| GSVT         | 0.861854 | 0.853264  | 0.870693 | 691.0   |
| SB           | 0.908396 | 0.898497  | 0.918515 | 1553.0  |
| SR           | 0.868782 | 0.889350  | 0.849148 | 907.0   |
| macro avg    | 0.874180 | 0.875675  | 0.873057 | 4026.0  |
| micro avg    | 0.880630 | 0.880630  | 0.880630 | 4026.0  |
| weighted avg | 0.880462 | 0.880651  | 0.880630 | 4026.0  |

The result of Model Number:Dataset Number:Featuregroup Number:Rescale of 83 : 1 : 3 : 0

|              | f1-score | precision | recall   | support |
|--------------|----------|-----------|----------|---------|
| AFIB         | 0.660468 | 0.732985  | 0.601167 | 204.0   |
| GSVT         | 0.771186 | 0.761545  | 0.781226 | 300.0   |
| SB           | 0.820504 | 0.816317  | 0.824735 | 892.0   |
| SR           | 0.801283 | 0.790080  | 0.812811 | 681.0   |
| macro avg    | 0.763360 | 0.775232  | 0.754985 | 2077.0  |
| micro avg    | 0.792583 | 0.792583  | 0.792583 | 2077.0  |
| weighted avg | 0.791360 | 0.791619  | 0.792583 | 2077.0  |

The result of Model Number:Dataset Number:Featuregroup Number:Rescale of 83 : 1 : 3 : 1

|      | f1-score | precision | recall   | support |
|------|----------|-----------|----------|---------|
| AFIB | 0.794167 | 0.781711  | 0.807112 | 875.0   |

GSVT 0.765232 0.787170 0.744573 691.0  
SB 0.804132 0.763370 0.849539 1553.0  
SR 0.653352 0.727048 0.593323 907.0  
macro avg 0.754221 0.764825 0.748637 4026.0  
micro avg 0.764580 0.764580 0.764580 4026.0  
weighted avg 0.761321 0.763258 0.764580 4026.0  
The result of Model Number:Dataset Number:Featuregroup Number:Rescale of 83 : 1 : 4 :  
0

f1-score precision recall support  
AFIB 0.671839 0.677442 0.666558 204.0  
GSVT 0.689587 0.686411 0.692806 300.0  
SB 0.699986 0.697500 0.702495 892.0  
SR 0.693521 0.696627 0.690478 681.0  
macro avg 0.688733 0.689495 0.688085 2077.0  
micro avg 0.693626 0.693626 0.693626 2077.0  
weighted avg 0.693600 0.693642 0.693626 2077.0  
The result of Model Number:Dataset Number:Featuregroup Number:Rescale of 83 : 1 : 4 :  
1

f1-score precision recall support  
AFIB 0.694023 0.698699 0.689512 875.0  
GSVT 0.706409 0.696597 0.716631 691.0  
SB 0.752756 0.747601 0.757989 1553.0  
SR 0.722251 0.734727 0.710231 907.0  
macro avg 0.718860 0.719406 0.718591 4026.0  
micro avg 0.725249 0.725249 0.725249 4026.0  
weighted avg 0.725164 0.725319 0.725249 4026.0  
The result of Model Number:Dataset Number:Featuregroup Number:Rescale of 83 : 1 : 5 :  
0

f1-score precision recall support  
AFIB 0.706782 0.720574 0.693631 204.0  
GSVT 0.724398 0.715050 0.734041 300.0  
SB 0.736727 0.729444 0.744161 892.0  
SR 0.721328 0.731350 0.711582 681.0  
macro avg 0.722309 0.724105 0.720854 2077.0  
micro avg 0.727054 0.727054 0.727054 2077.0  
weighted avg 0.726956 0.727119 0.727054 2077.0  
The result of Model Number:Dataset Number:Featuregroup Number:Rescale of 83 : 1 : 5 :  
1

f1-score precision recall support  
AFIB 0.913776 0.923719 0.904311 204.0  
GSVT 0.944699 0.940759 0.948825 300.0  
SB 0.964058 0.963195 0.964922 892.0  
SR 0.954947 0.954955 0.954947 681.0  
macro avg 0.944370 0.945657 0.943251 2077.0

micro avg 0.953373 0.953373 0.953373 2077.0  
weighted avg 0.953336 0.953376 0.953373 2077.0  
The result of Model Number:Dataset Number:Featuregroup Number:Rescale of 83 : 1 : 6 :  
0

|              | f1-score | precision | recall   | support |
|--------------|----------|-----------|----------|---------|
| AFIB         | 0.684548 | 0.686860  | 0.682276 | 875.0   |
| GSVT         | 0.682740 | 0.677931  | 0.687680 | 691.0   |
| SB           | 0.718368 | 0.711701  | 0.725166 | 1553.0  |
| SR           | 0.691057 | 0.704375  | 0.678268 | 907.0   |
| macro avg    | 0.694178 | 0.695217  | 0.693348 | 4026.0  |
| micro avg    | 0.698845 | 0.698845  | 0.698845 | 4026.0  |
| weighted avg | 0.698750 | 0.698855  | 0.698845 | 4026.0  |

The result of Model Number:Dataset Number:Featuregroup Number:Rescale of 83 : 1 : 6 :  
1

|              | f1-score | precision | recall   | support |
|--------------|----------|-----------|----------|---------|
| AFIB         | 0.667579 | 0.684203  | 0.651776 | 875.0   |
| GSVT         | 0.705345 | 0.708340  | 0.702405 | 691.0   |
| SB           | 0.765075 | 0.762147  | 0.768029 | 1553.0  |
| SR           | 0.727754 | 0.714193  | 0.741879 | 907.0   |
| macro avg    | 0.716438 | 0.717221  | 0.716022 | 4026.0  |
| micro avg    | 0.725609 | 0.725609  | 0.725609 | 4026.0  |
| weighted avg | 0.725226 | 0.725168  | 0.725609 | 4026.0  |

The result of Model Number:Dataset Number:Featuregroup Number:Rescale of 83 : 1 : 7 :  
0

|              | f1-score | precision | recall   | support |
|--------------|----------|-----------|----------|---------|
| AFIB         | 0.674148 | 0.730426  | 0.627266 | 204.0   |
| GSVT         | 0.723102 | 0.714009  | 0.732724 | 300.0   |
| SB           | 0.741562 | 0.731173  | 0.752337 | 892.0   |
| SR           | 0.721333 | 0.724712  | 0.718337 | 681.0   |
| macro avg    | 0.715036 | 0.725080  | 0.707666 | 2077.0  |
| micro avg    | 0.726072 | 0.726072  | 0.726072 | 2077.0  |
| weighted avg | 0.725642 | 0.726502  | 0.726072 | 2077.0  |

The result of Model Number:Dataset Number:Featuregroup Number:Rescale of 83 : 1 : 7 :  
1

|              | f1-score | precision | recall   | support |
|--------------|----------|-----------|----------|---------|
| AFIB         | 0.803752 | 0.839026  | 0.771526 | 204.0   |
| GSVT         | 0.748240 | 0.753628  | 0.743237 | 300.0   |
| SB           | 0.775984 | 0.737017  | 0.819305 | 892.0   |
| SR           | 0.688420 | 0.733872  | 0.648414 | 681.0   |
| macro avg    | 0.754099 | 0.765886  | 0.745621 | 2077.0  |
| micro avg    | 0.747594 | 0.747594  | 0.747594 | 2077.0  |
| weighted avg | 0.745994 | 0.748404  | 0.747594 | 2077.0  |

The result of Model Number:Dataset Number:Featuregroup Number:Rescale of 83 : 1 : 8 :  
0

f1-score precision recall support  
AFIB 0.671752 0.680836 0.663189 204.0  
GSVT 0.697268 0.696136 0.698428 300.0  
SB 0.712410 0.711461 0.713368 892.0  
SR 0.705128 0.704225 0.706059 681.0  
macro avg 0.696640 0.698165 0.695261 2077.0  
micro avg 0.703885 0.703885 0.703885 2077.0  
weighted avg 0.703842 0.703867 0.703885 2077.0  
The result of Model Number:Dataset Number:Featuregroup Number:Rescale of 83 : 1 : 8 :  
1

f1-score precision recall support  
AFIB 0.877610 0.883523 0.871906 875.0  
GSVT 0.893273 0.880865 0.906198 691.0  
SB 0.951879 0.945361 0.958496 1553.0  
SR 0.913305 0.929081 0.898105 907.0  
macro avg 0.909017 0.909707 0.908676 4026.0  
micro avg 0.917095 0.917095 0.917095 4026.0  
weighted avg 0.916989 0.917184 0.917095 4026.0  
The result of Model Number:Dataset Number:Featuregroup Number:Rescale of 83 : 1 : 9 :  
0

f1-score precision recall support  
AFIB 0.725274 0.724407 0.726267 875.0  
GSVT 0.739412 0.741956 0.736962 691.0  
SB 0.783148 0.778323 0.788039 1553.0  
SR 0.767211 0.774704 0.759946 907.0  
macro avg 0.753761 0.754847 0.752803 4026.0  
micro avg 0.759518 0.759518 0.759518 4026.0  
weighted avg 0.759473 0.759548 0.759518 4026.0  
The result of Model Number:Dataset Number:Featuregroup Number:Rescale of 83 : 1 : 9 :  
1

f1-score precision recall support  
AFIB 0.671670 0.693975 0.651009 204.0  
GSVT 0.697160 0.691567 0.702949 300.0  
SB 0.712563 0.709635 0.715517 892.0  
SR 0.705908 0.705805 0.706012 681.0  
macro avg 0.696825 0.700246 0.693872 2077.0  
micro avg 0.704250 0.704250 0.704250 2077.0  
weighted avg 0.704140 0.704232 0.704250 2077.0  
The result of Model Number:Dataset Number:Featuregroup Number:Rescale of 83 : 1 :  
10 : 0

f1-score precision recall support  
AFIB 0.900199 0.911252 0.889551 204.0  
GSVT 0.918330 0.914408 0.922308 300.0  
SB 0.929447 0.926657 0.932258 892.0



SR 0.921624 0.923817 0.919470 681.0  
macro avg 0.917400 0.919034 0.915897 2077.0  
micro avg 0.922433 0.922433 0.922433 2077.0  
weighted avg 0.922403 0.922444 0.922433 2077.0  
The result of Model Number:Dataset Number:Featuregroup Number:Rescale of 83 : 1 :  
10 : 1

f1-score precision recall support  
AFIB 0.538868 0.587013 0.569057 204.0  
GSVT 0.731933 0.719968 0.744554 300.0  
SB 0.623101 0.618355 0.627966 892.0  
SR 0.761950 0.753329 0.770794 681.0  
macro avg 0.663963 0.669666 0.678093 2077.0  
micro avg 0.685850 0.685850 0.685850 2077.0  
weighted avg 0.676073 0.674208 0.685850 2077.0

The result of Model Number:Dataset Number:Featuregroup Number:Rescale of 84 : 0 : 0 :  
0

f1-score precision recall support  
AFIB 0.773949 0.789077 0.759525 204.0  
GSVT 0.795215 0.789486 0.801056 300.0  
SB 0.809447 0.806298 0.812624 892.0  
SR 0.800600 0.802865 0.798364 681.0  
macro avg 0.794803 0.796932 0.792892 2077.0  
micro avg 0.801062 0.801062 0.801062 2077.0  
weighted avg 0.801004 0.801053 0.801062 2077.0

The result of Model Number:Dataset Number:Featuregroup Number:Rescale of 84 : 0 : 0 :  
1

f1-score precision recall support  
AFIB 0.622514 0.688337 0.568504 204.0  
GSVT 0.716283 0.707994 0.724906 300.0  
SB 0.757311 0.754197 0.760452 892.0  
SR 0.741047 0.730071 0.752367 681.0  
macro avg 0.709289 0.720150 0.701557 2077.0  
micro avg 0.733814 0.733814 0.733814 2077.0  
weighted avg 0.732813 0.733144 0.733814 2077.0

The result of Model Number:Dataset Number:Featuregroup Number:Rescale of 84 : 0 : 1 :  
0

f1-score precision recall support  
AFIB 0.818880 0.843898 0.795394 875.0  
GSVT 0.869007 0.866064 0.872047 691.0  
SB 0.949602 0.945788 0.953453 1553.0  
SR 0.899380 0.883780 0.915628 907.0  
macro avg 0.884217 0.884882 0.884130 4026.0  
micro avg 0.896607 0.896607 0.896607 4026.0  
weighted avg 0.896044 0.895991 0.896607 4026.0

The result of Model Number:Dataset Number:Featuregroup Number:Rescale of 84 : 0 : 1 : 1

|              | f1-score | precision | recall   | support |
|--------------|----------|-----------|----------|---------|
| AFIB         | 0.811104 | 0.827950  | 0.795116 | 875.0   |
| GSVT         | 0.790987 | 0.763515  | 0.855555 | 691.0   |
| SB           | 0.932302 | 0.928098  | 0.936560 | 1553.0  |
| SR           | 0.708780 | 0.697337  | 0.720669 | 907.0   |
| macro avg    | 0.810793 | 0.804225  | 0.826975 | 4026.0  |
| micro avg    | 0.843279 | 0.843279  | 0.843279 | 4026.0  |
| weighted avg | 0.831350 | 0.826097  | 0.843279 | 4026.0  |

The result of Model Number:Dataset Number:Featuregroup Number:Rescale of 84 : 0 : 2 : 0

|              | f1-score | precision | recall   | support |
|--------------|----------|-----------|----------|---------|
| AFIB         | 0.760174 | 0.750082  | 0.770600 | 875.0   |
| GSVT         | 0.775603 | 0.782956  | 0.768421 | 691.0   |
| SB           | 0.825353 | 0.823401  | 0.827318 | 1553.0  |
| SR           | 0.802962 | 0.811405  | 0.794726 | 907.0   |
| macro avg    | 0.791023 | 0.791961  | 0.790266 | 4026.0  |
| micro avg    | 0.797540 | 0.797540  | 0.797540 | 4026.0  |
| weighted avg | 0.797604 | 0.797822  | 0.797540 | 4026.0  |

The result of Model Number:Dataset Number:Featuregroup Number:Rescale of 84 : 0 : 2 : 1

|              | f1-score | precision | recall   | support |
|--------------|----------|-----------|----------|---------|
| AFIB         | 0.717001 | 0.717129  | 0.716904 | 875.0   |
| GSVT         | 0.724587 | 0.727034  | 0.722201 | 691.0   |
| SB           | 0.761141 | 0.758517  | 0.763787 | 1553.0  |
| SR           | 0.746687 | 0.749206  | 0.744213 | 907.0   |
| macro avg    | 0.737354 | 0.737971  | 0.736776 | 4026.0  |
| micro avg    | 0.742050 | 0.742050  | 0.742050 | 4026.0  |
| weighted avg | 0.742017 | 0.742020  | 0.742050 | 4026.0  |

The result of Model Number:Dataset Number:Featuregroup Number:Rescale of 84 : 0 : 3 : 0

|              | f1-score | precision | recall   | support |
|--------------|----------|-----------|----------|---------|
| AFIB         | 0.744662 | 0.737761  | 0.751736 | 875.0   |
| GSVT         | 0.758036 | 0.762152  | 0.753976 | 691.0   |
| SB           | 0.803182 | 0.801330  | 0.805043 | 1553.0  |
| SR           | 0.784468 | 0.791708  | 0.777385 | 907.0   |
| macro avg    | 0.772587 | 0.773238  | 0.772035 | 4026.0  |
| micro avg    | 0.778461 | 0.778461  | 0.778461 | 4026.0  |
| weighted avg | 0.778499 | 0.778622  | 0.778461 | 4026.0  |

The result of Model Number:Dataset Number:Featuregroup Number:Rescale of 84 : 0 : 3 : 1

|      | f1-score | precision | recall   | support |
|------|----------|-----------|----------|---------|
| AFIB | 0.711827 | 0.735466  | 0.689931 | 204.0   |

GSVT 0.738841 0.732914 0.744976 300.0  
SB 0.755165 0.752062 0.758296 892.0  
SR 0.748112 0.748002 0.748223 681.0  
macro avg 0.738486 0.742111 0.735356 2077.0  
micro avg 0.746355 0.746355 0.746355 2077.0  
weighted avg 0.746238 0.746335 0.746355 2077.0  
The result of Model Number:Dataset Number:Featuregroup Number:Rescale of 84 : 0 : 4 :  
0

f1-score precision recall support

AFIB 0.848835 0.837700 0.860308 875.0  
GSVT 0.861830 0.871410 0.852474 691.0  
SB 0.914082 0.911925 0.916255 1553.0  
SR 0.891196 0.899217 0.883330 907.0  
macro avg 0.878986 0.880063 0.878092 4026.0  
micro avg 0.885731 0.885731 0.885731 4026.0  
weighted avg 0.885777 0.885976 0.885731 4026.0  
The result of Model Number:Dataset Number:Featuregroup Number:Rescale of 84 : 0 : 4 :  
1

f1-score precision recall support

AFIB 0.845089 0.881690 0.811646 204.0  
GSVT 0.790012 0.797384 0.783171 300.0  
SB 0.818904 0.778643 0.863614 892.0  
SR 0.729866 0.775926 0.689203 681.0  
macro avg 0.795968 0.808411 0.786909 2077.0  
micro avg 0.789705 0.789705 0.789705 2077.0  
weighted avg 0.788109 0.790580 0.789705 2077.0  
The result of Model Number:Dataset Number:Featuregroup Number:Rescale of 84 : 0 : 5 :  
0

f1-score precision recall support

AFIB 0.819774 0.821954 0.817655 875.0  
GSVT 0.835538 0.829652 0.841557 691.0  
SB 0.883262 0.874256 0.892473 1553.0  
SR 0.842887 0.861246 0.825324 907.0  
macro avg 0.845365 0.846777 0.844252 4026.0  
micro avg 0.852345 0.852345 0.852345 4026.0  
weighted avg 0.852176 0.852302 0.852345 4026.0  
The result of Model Number:Dataset Number:Featuregroup Number:Rescale of 84 : 0 : 5 :  
1

f1-score precision recall support

AFIB 0.721934 0.733003 0.711312 204.0  
GSVT 0.739052 0.732781 0.745461 300.0  
SB 0.751908 0.749481 0.754352 892.0  
SR 0.744181 0.746944 0.741448 681.0  
macro avg 0.739269 0.740552 0.738144 2077.0

micro avg 0.744610 0.744610 0.744610 2077.0  
weighted avg 0.744573 0.744619 0.744610 2077.0  
The result of Model Number:Dataset Number:Featuregroup Number:Rescale of 84 : 0 : 6 :  
0

|              | f1-score | precision | recall   | support |
|--------------|----------|-----------|----------|---------|
| AFIB         | 0.906105 | 0.940609  | 0.874240 | 204.0   |
| GSVT         | 0.934974 | 0.925550  | 0.944632 | 300.0   |
| SB           | 0.953688 | 0.948940  | 0.958497 | 892.0   |
| SR           | 0.942168 | 0.942761  | 0.941607 | 681.0   |
| macro avg    | 0.934233 | 0.939465  | 0.929744 | 2077.0  |
| micro avg    | 0.942681 | 0.942681  | 0.942681 | 2077.0  |
| weighted avg | 0.942534 | 0.942717  | 0.942681 | 2077.0  |

The result of Model Number:Dataset Number:Featuregroup Number:Rescale of 84 : 0 : 6 :  
1

|              | f1-score | precision | recall   | support |
|--------------|----------|-----------|----------|---------|
| AFIB         | 0.669017 | 0.684146  | 0.654563 | 875.0   |
| GSVT         | 0.709310 | 0.712329  | 0.706358 | 691.0   |
| SB           | 0.770163 | 0.766534  | 0.773832 | 1553.0  |
| SR           | 0.729719 | 0.718526  | 0.741297 | 907.0   |
| macro avg    | 0.719552 | 0.720383  | 0.719013 | 4026.0  |
| micro avg    | 0.729000 | 0.729000  | 0.729000 | 4026.0  |
| weighted avg | 0.728624 | 0.728509  | 0.729000 | 4026.0  |

The result of Model Number:Dataset Number:Featuregroup Number:Rescale of 84 : 0 : 7 :  
0

|              | f1-score | precision | recall   | support |
|--------------|----------|-----------|----------|---------|
| AFIB         | 0.735872 | 0.741635  | 0.730236 | 875.0   |
| GSVT         | 0.737812 | 0.728396  | 0.747521 | 691.0   |
| SB           | 0.773882 | 0.770778  | 0.777019 | 1553.0  |
| SR           | 0.757532 | 0.764968  | 0.750267 | 907.0   |
| macro avg    | 0.751274 | 0.751444  | 0.751261 | 4026.0  |
| micro avg    | 0.755762 | 0.755762  | 0.755762 | 4026.0  |
| weighted avg | 0.755747 | 0.755861  | 0.755762 | 4026.0  |

The result of Model Number:Dataset Number:Featuregroup Number:Rescale of 84 : 0 : 7 :  
1

|              | f1-score | precision | recall   | support |
|--------------|----------|-----------|----------|---------|
| AFIB         | 0.777343 | 0.789262  | 0.765907 | 204.0   |
| GSVT         | 0.795775 | 0.789023  | 0.802677 | 300.0   |
| SB           | 0.809618 | 0.807005  | 0.812250 | 892.0   |
| SR           | 0.801299 | 0.804273  | 0.798356 | 681.0   |
| macro avg    | 0.796009 | 0.797391  | 0.794797 | 2077.0  |
| micro avg    | 0.801760 | 0.801760  | 0.801760 | 2077.0  |
| weighted avg | 0.801721 | 0.801769  | 0.801760 | 2077.0  |

The result of Model Number:Dataset Number:Featuregroup Number:Rescale of 84 : 0 : 8 :  
0

f1-score precision recall support  
AFIB 0.716359 0.772192 0.668388 204.0  
GSVT 0.738204 0.750701 0.726149 300.0  
SB 0.782358 0.775157 0.789717 892.0  
SR 0.751219 0.740325 0.762473 681.0  
macro avg 0.747035 0.759594 0.736682 2077.0  
micro avg 0.759686 0.759686 0.759686 2077.0  
weighted avg 0.759288 0.759913 0.759686 2077.0  
The result of Model Number:Dataset Number:Featuregroup Number:Rescale of 84 : 0 : 8 :  
1

f1-score precision recall support  
AFIB 0.910547 0.910492 0.910659 875.0  
GSVT 0.912518 0.907585 0.917521 691.0  
SB 0.956113 0.949751 0.962573 1553.0  
SR 0.930724 0.945995 0.915974 907.0  
macro avg 0.927476 0.928456 0.926682 4026.0  
micro avg 0.933059 0.933059 0.933059 4026.0  
weighted avg 0.933008 0.933135 0.933059 4026.0  
The result of Model Number:Dataset Number:Featuregroup Number:Rescale of 84 : 0 : 9 :  
0

f1-score precision recall support  
AFIB 0.783864 0.793932 0.774087 875.0  
GSVT 0.792536 0.786127 0.799177 691.0  
SB 0.847787 0.845238 0.850353 1553.0  
SR 0.826794 0.826446 0.827152 907.0  
macro avg 0.812745 0.812936 0.812693 4026.0  
micro avg 0.819767 0.819767 0.819767 4026.0  
weighted avg 0.819682 0.819708 0.819767 4026.0  
The result of Model Number:Dataset Number:Featuregroup Number:Rescale of 84 : 0 : 9 :  
1

f1-score precision recall support  
AFIB 0.682197 0.714950 0.652450 204.0  
GSVT 0.711870 0.705825 0.718039 300.0  
SB 0.723057 0.717791 0.728405 892.0  
SR 0.715451 0.715783 0.715141 681.0  
macro avg 0.708144 0.713587 0.703509 2077.0  
micro avg 0.715099 0.715099 0.715099 2077.0  
weighted avg 0.714934 0.715125 0.715099 2077.0  
The result of Model Number:Dataset Number:Featuregroup Number:Rescale of 84 : 0 :  
10 : 0

f1-score precision recall support  
AFIB 0.846699 0.863758 0.830844 204.0  
GSVT 0.873867 0.866849 0.881169 300.0  
SB 0.892786 0.891887 0.893687 892.0

SR 0.884648 0.884140 0.885166 681.0  
macro avg 0.874500 0.876659 0.872717 2077.0  
micro avg 0.882913 0.882913 0.882913 2077.0  
weighted avg 0.882858 0.882968 0.882913 2077.0  
The result of Model Number:Dataset Number:Featuregroup Number:Rescale of 84 : 0 :

10 : 1

f1-score precision recall support

AFIB 0.763124 0.751718 0.774910 875.0  
GSVT 0.777756 0.784407 0.771228 691.0  
SB 0.831014 0.828153 0.833901 1553.0  
SR 0.806691 0.818722 0.795035 907.0  
macro avg 0.794646 0.795750 0.793769 4026.0  
micro avg 0.801567 0.801567 0.801567 4026.0  
weighted avg 0.801638 0.801908 0.801567 4026.0

The result of Model Number:Dataset Number:Featuregroup Number:Rescale of 84 : 1 : 0 :  
0

f1-score precision recall support

AFIB 0.769646 0.793160 0.747572 875.0  
GSVT 0.816760 0.813993 0.819617 691.0  
SB 0.892509 0.888924 0.896128 1553.0  
SR 0.845306 0.830644 0.860578 907.0  
macro avg 0.831055 0.831680 0.830974 4026.0  
micro avg 0.842701 0.842701 0.842701 4026.0  
weighted avg 0.842171 0.842121 0.842701 4026.0

The result of Model Number:Dataset Number:Featuregroup Number:Rescale of 84 : 1 : 0 :  
1

f1-score precision recall support

AFIB 0.770040 0.781399 0.759090 204.0  
GSVT 0.788943 0.785846 0.792090 300.0  
SB 0.806465 0.804848 0.808092 892.0  
SR 0.800745 0.800865 0.800631 681.0  
macro avg 0.791548 0.793240 0.789976 2077.0  
micro avg 0.798521 0.798521 0.798521 2077.0  
weighted avg 0.798481 0.798494 0.798521 2077.0

The result of Model Number:Dataset Number:Featuregroup Number:Rescale of 84 : 1 : 1 :  
0

f1-score precision recall support

AFIB 0.680702 0.685873 0.675668 204.0  
GSVT 0.694638 0.687854 0.701573 300.0  
SB 0.710842 0.709024 0.712674 892.0  
SR 0.703301 0.707274 0.699381 681.0  
macro avg 0.697371 0.697506 0.697324 2077.0  
micro avg 0.703078 0.703078 0.703078 2077.0  
weighted avg 0.703069 0.703119 0.703078 2077.0

The result of Model Number:Dataset Number:Featuregroup Number:Rescale of 84 : 1 : 1 : 1

|              | f1-score | precision | recall   | support |
|--------------|----------|-----------|----------|---------|
| AFIB         | 0.710812 | 0.711317  | 0.710321 | 875.0   |
| GSVT         | 0.720390 | 0.721811  | 0.719037 | 691.0   |
| SB           | 0.765175 | 0.762632  | 0.767738 | 1553.0  |
| SR           | 0.747196 | 0.749973  | 0.744463 | 907.0   |
| macro avg    | 0.735893 | 0.736433  | 0.735390 | 4026.0  |
| micro avg    | 0.741657 | 0.741657  | 0.741657 | 4026.0  |
| weighted avg | 0.741623 | 0.741621  | 0.741657 | 4026.0  |

The result of Model Number:Dataset Number:Featuregroup Number:Rescale of 84 : 1 : 2 : 0

|              | f1-score | precision | recall   | support |
|--------------|----------|-----------|----------|---------|
| AFIB         | 0.757408 | 0.745529  | 0.769754 | 875.0   |
| GSVT         | 0.729812 | 0.750735  | 0.710109 | 691.0   |
| SB           | 0.766912 | 0.728036  | 0.810217 | 1553.0  |
| SR           | 0.623111 | 0.693396  | 0.565861 | 907.0   |
| macro avg    | 0.719311 | 0.729424  | 0.713985 | 4026.0  |
| micro avg    | 0.729191 | 0.729191  | 0.729191 | 4026.0  |
| weighted avg | 0.726082 | 0.727930  | 0.729191 | 4026.0  |

The result of Model Number:Dataset Number:Featuregroup Number:Rescale of 84 : 1 : 2 : 1

|              | f1-score | precision | recall   | support |
|--------------|----------|-----------|----------|---------|
| AFIB         | 0.795497 | 0.812971  | 0.779056 | 204.0   |
| GSVT         | 0.821134 | 0.814498  | 0.827993 | 300.0   |
| SB           | 0.838344 | 0.837313  | 0.839378 | 892.0   |
| SR           | 0.831266 | 0.830543  | 0.831996 | 681.0   |
| macro avg    | 0.821560 | 0.823831  | 0.819606 | 2077.0  |
| micro avg    | 0.829388 | 0.829388  | 0.829388 | 2077.0  |
| weighted avg | 0.829329 | 0.829407  | 0.829388 | 2077.0  |

The result of Model Number:Dataset Number:Featuregroup Number:Rescale of 84 : 1 : 3 : 0

|              | f1-score | precision | recall   | support |
|--------------|----------|-----------|----------|---------|
| AFIB         | 0.625075 | 0.608654  | 0.664206 | 875.0   |
| GSVT         | 0.601316 | 0.569153  | 0.685488 | 691.0   |
| SB           | 0.569778 | 0.566177  | 0.573442 | 1553.0  |
| SR           | 0.553449 | 0.562985  | 0.544386 | 907.0   |
| macro avg    | 0.587405 | 0.576742  | 0.616880 | 4026.0  |
| micro avg    | 0.605853 | 0.605853  | 0.605853 | 4026.0  |
| weighted avg | 0.583531 | 0.575201  | 0.605853 | 4026.0  |

The result of Model Number:Dataset Number:Featuregroup Number:Rescale of 84 : 1 : 3 : 1

|      | f1-score | precision | recall   | support |
|------|----------|-----------|----------|---------|
| AFIB | 0.595054 | 0.599982  | 0.670247 | 204.0   |

GSVT 0.645296 0.617676 0.728045 300.0  
SB 0.589179 0.587132 0.591243 892.0  
SR 0.583321 0.583431 0.583215 681.0  
macro avg 0.603212 0.597055 0.643187 2077.0  
micro avg 0.616130 0.616130 0.616130 2077.0  
weighted avg 0.595941 0.591592 0.616130 2077.0  
The result of Model Number:Dataset Number:Featuregroup Number:Rescale of 84 : 1 : 4 :  
0

f1-score precision recall support

AFIB 0.689613 0.690995 0.688266 875.0  
GSVT 0.691321 0.687589 0.695112 691.0  
SB 0.722663 0.718802 0.726570 1553.0  
SR 0.705374 0.713739 0.697223 907.0  
macro avg 0.702243 0.702781 0.701793 4026.0  
micro avg 0.706234 0.706234 0.706234 4026.0  
weighted avg 0.706206 0.706261 0.706234 4026.0  
The result of Model Number:Dataset Number:Featuregroup Number:Rescale of 84 : 1 : 4 :  
1

f1-score precision recall support

AFIB 0.880169 0.918797 0.844880 204.0  
GSVT 0.819380 0.825279 0.813901 300.0  
SB 0.849762 0.807089 0.897202 892.0  
SR 0.753872 0.803646 0.710063 681.0  
macro avg 0.825796 0.838703 0.816511 2077.0  
micro avg 0.818672 0.818672 0.818672 2077.0  
weighted avg 0.816920 0.819560 0.818672 2077.0  
The result of Model Number:Dataset Number:Featuregroup Number:Rescale of 84 : 1 : 5 :  
0

f1-score precision recall support

AFIB 0.744804 0.738144 0.751617 875.0  
GSVT 0.756762 0.759756 0.753819 691.0  
SB 0.806870 0.805373 0.808376 1553.0  
SR 0.786424 0.793694 0.779315 907.0  
macro avg 0.773715 0.774242 0.773282 4026.0  
micro avg 0.780129 0.780129 0.780129 4026.0  
weighted avg 0.780174 0.780301 0.780129 4026.0  
The result of Model Number:Dataset Number:Featuregroup Number:Rescale of 84 : 1 : 5 :  
1

f1-score precision recall support

AFIB 0.780501 0.793477 0.768122 204.0  
GSVT 0.795468 0.789816 0.801260 300.0  
SB 0.813918 0.809344 0.818563 892.0  
SR 0.803549 0.808465 0.798718 681.0  
macro avg 0.798359 0.800276 0.796666 2077.0



micro avg 0.804603 0.804603 0.804603 2077.0  
weighted avg 0.804571 0.804677 0.804603 2077.0  
The result of Model Number:Dataset Number:Featuregroup Number:Rescale of 84 : 1 : 6 :  
0

|              | f1-score | precision | recall   | support |
|--------------|----------|-----------|----------|---------|
| AFIB         | 0.702540 | 0.778243  | 0.640823 | 204.0   |
| GSVT         | 0.828111 | 0.816503  | 0.840267 | 300.0   |
| SB           | 0.879253 | 0.876422  | 0.882112 | 892.0   |
| SR           | 0.856742 | 0.843711  | 0.870204 | 681.0   |
| macro avg    | 0.816661 | 0.828720  | 0.808351 | 2077.0  |
| micro avg    | 0.848464 | 0.848464  | 0.848464 | 2077.0  |
| weighted avg | 0.847129 | 0.847399  | 0.848464 | 2077.0  |

The result of Model Number:Dataset Number:Featuregroup Number:Rescale of 84 : 1 : 6 :  
1

|              | f1-score | precision | recall   | support |
|--------------|----------|-----------|----------|---------|
| AFIB         | 0.686380 | 0.707350  | 0.666694 | 875.0   |
| GSVT         | 0.728397 | 0.725930  | 0.730944 | 691.0   |
| SB           | 0.795951 | 0.792754  | 0.799179 | 1553.0  |
| SR           | 0.753855 | 0.740779  | 0.767474 | 907.0   |
| macro avg    | 0.741146 | 0.741703  | 0.741073 | 4026.0  |
| micro avg    | 0.751531 | 0.751531  | 0.751531 | 4026.0  |
| weighted avg | 0.751059 | 0.751014  | 0.751531 | 4026.0  |

The result of Model Number:Dataset Number:Featuregroup Number:Rescale of 84 : 1 : 7 :  
0

|              | f1-score | precision | recall   | support |
|--------------|----------|-----------|----------|---------|
| AFIB         | 0.803330 | 0.772618  | 0.853862 | 875.0   |
| GSVT         | 0.832385 | 0.803658  | 0.871351 | 691.0   |
| SB           | 0.927432 | 0.911061  | 0.945420 | 1553.0  |
| SR           | 0.785514 | 0.944535  | 0.678185 | 907.0   |
| macro avg    | 0.837165 | 0.857968  | 0.837205 | 4026.0  |
| micro avg    | 0.852604 | 0.852604  | 0.852604 | 4026.0  |
| weighted avg | 0.852174 | 0.870080  | 0.852604 | 4026.0  |

The result of Model Number:Dataset Number:Featuregroup Number:Rescale of 84 : 1 : 7 :  
1

|              | f1-score | precision | recall   | support |
|--------------|----------|-----------|----------|---------|
| AFIB         | 0.815129 | 0.804213  | 0.826398 | 875.0   |
| GSVT         | 0.833354 | 0.839859  | 0.826964 | 691.0   |
| SB           | 0.884790 | 0.882022  | 0.887580 | 1553.0  |
| SR           | 0.863393 | 0.874839  | 0.852258 | 907.0   |
| macro avg    | 0.849167 | 0.850233  | 0.848300 | 4026.0  |
| micro avg    | 0.855922 | 0.855922  | 0.855922 | 4026.0  |
| weighted avg | 0.856001 | 0.856256  | 0.855922 | 4026.0  |

The result of Model Number:Dataset Number:Featuregroup Number:Rescale of 84 : 1 : 8 :  
0

f1-score precision recall support  
AFIB 0.816129 0.818634 0.813768 204.0  
GSVT 0.837568 0.835440 0.839782 300.0  
SB 0.856278 0.855232 0.857332 892.0  
SR 0.849270 0.850903 0.847650 681.0  
macro avg 0.839811 0.840052 0.839633 2077.0  
micro avg 0.847344 0.847344 0.847344 2077.0  
weighted avg 0.847334 0.847359 0.847344 2077.0  
The result of Model Number:Dataset Number:Featuregroup Number:Rescale of 84 : 1 : 8 :  
1

f1-score precision recall support  
AFIB 0.736009 0.744187 0.728386 204.0  
GSVT 0.758807 0.754488 0.763397 300.0  
SB 0.773903 0.772866 0.774944 892.0  
SR 0.767319 0.768347 0.766304 681.0  
macro avg 0.759010 0.759972 0.758258 2077.0  
micro avg 0.765870 0.765870 0.765870 2077.0  
weighted avg 0.765842 0.765913 0.765870 2077.0  
The result of Model Number:Dataset Number:Featuregroup Number:Rescale of 84 : 1 : 9 :  
0

f1-score precision recall support  
AFIB 0.911996 0.920880 0.903505 204.0  
GSVT 0.933086 0.928802 0.937442 300.0  
SB 0.945981 0.942726 0.949265 892.0  
SR 0.937992 0.941631 0.934425 681.0  
macro avg 0.932264 0.933510 0.931159 2077.0  
micro avg 0.938197 0.938197 0.938197 2077.0  
weighted avg 0.938161 0.938210 0.938197 2077.0  
The result of Model Number:Dataset Number:Featuregroup Number:Rescale of 84 : 1 : 9 :  
1

f1-score precision recall support  
AFIB 0.796211 0.801784 0.790745 204.0  
GSVT 0.814736 0.810719 0.818805 300.0  
SB 0.830929 0.829546 0.832327 892.0  
SR 0.822659 0.824612 0.820725 681.0  
macro avg 0.816134 0.816665 0.815651 2077.0  
micro avg 0.822486 0.822486 0.822486 2077.0  
weighted avg 0.822469 0.822482 0.822486 2077.0  
The result of Model Number:Dataset Number:Featuregroup Number:Rescale of 84 : 1 :  
10 : 0

f1-score precision recall support  
AFIB 0.717934 0.734184 0.702479 204.0  
GSVT 0.737039 0.733430 0.740716 300.0  
SB 0.752117 0.749945 0.754307 892.0

SR 0.747285 0.746962 0.747619 681.0  
macro avg 0.738594 0.741130 0.736280 2077.0  
micro avg 0.745061 0.745061 0.745061 2077.0  
weighted avg 0.744997 0.745033 0.745061 2077.0  
The result of Model Number:Dataset Number:Featuregroup Number:Rescale of 84 : 1 :  
10 : 1

f1-score precision recall support  
AFIB 0.872329 0.914210 0.834292 204.0  
GSVT 0.910272 0.902542 0.918160 300.0  
SB 0.924577 0.917844 0.931415 892.0  
SR 0.914851 0.915275 0.914455 681.0  
macro avg 0.905507 0.912468 0.899580 2077.0  
micro avg 0.914400 0.914400 0.914400 2077.0  
weighted avg 0.914190 0.914435 0.914400 2077.0  
The result of Model Number:Dataset Number:Featuregroup Number:Rescale of 85 : 0 : 0 :  
0

f1-score precision recall support  
AFIB 0.777125 0.796033 0.759286 204.0  
GSVT 0.786894 0.776061 0.798138 300.0  
SB 0.802783 0.794766 0.810969 892.0  
SR 0.788767 0.799118 0.778703 681.0  
macro avg 0.788892 0.791495 0.786774 2077.0  
micro avg 0.793460 0.793460 0.793460 2077.0  
weighted avg 0.793372 0.793616 0.793460 2077.0  
The result of Model Number:Dataset Number:Featuregroup Number:Rescale of 85 : 0 : 0 :  
1

f1-score precision recall support  
AFIB 0.713421 0.750984 0.679628 204.0  
GSVT 0.749246 0.742683 0.755959 300.0  
SB 0.768687 0.763942 0.773506 892.0  
SR 0.758200 0.756662 0.759762 681.0  
macro avg 0.747388 0.753568 0.742213 2077.0  
micro avg 0.757244 0.757244 0.757244 2077.0  
weighted avg 0.757012 0.757212 0.757244 2077.0  
The result of Model Number:Dataset Number:Featuregroup Number:Rescale of 85 : 0 : 1 :  
0

f1-score precision recall support  
AFIB 0.744277 0.755255 0.733693 204.0  
GSVT 0.762548 0.759555 0.765589 300.0  
SB 0.779483 0.777920 0.781056 892.0  
SR 0.773954 0.774071 0.773845 681.0  
macro avg 0.765065 0.766700 0.763546 2077.0  
micro avg 0.771806 0.771806 0.771806 2077.0  
weighted avg 0.771766 0.771779 0.771806 2077.0

The result of Model Number:Dataset Number:Featuregroup Number:Rescale of 85 : 0 : 1 :  
1

|              | f1-score | precision | recall   | support |
|--------------|----------|-----------|----------|---------|
| AFIB         | 0.723198 | 0.728691  | 0.717849 | 204.0   |
| GSVT         | 0.738004 | 0.730796  | 0.745372 | 300.0   |
| SB           | 0.755219 | 0.753288  | 0.757166 | 892.0   |
| SR           | 0.747208 | 0.751429  | 0.743043 | 681.0   |
| macro avg    | 0.740907 | 0.741051  | 0.740858 | 2077.0  |
| micro avg    | 0.746970 | 0.746970  | 0.746970 | 2077.0  |
| weighted avg | 0.746961 | 0.747014  | 0.746970 | 2077.0  |

The result of Model Number:Dataset Number:Featuregroup Number:Rescale of 85 : 0 : 2 :  
0

|              | f1-score | precision | recall   | support |
|--------------|----------|-----------|----------|---------|
| AFIB         | 0.704214 | 0.702178  | 0.706326 | 875.0   |
| GSVT         | 0.717266 | 0.716682  | 0.717900 | 691.0   |
| SB           | 0.761840 | 0.758685  | 0.765028 | 1553.0  |
| SR           | 0.738969 | 0.747087  | 0.731065 | 907.0   |
| macro avg    | 0.730572 | 0.731158  | 0.730080 | 4026.0  |
| micro avg    | 0.736530 | 0.736530  | 0.736530 | 4026.0  |
| weighted avg | 0.736513 | 0.736582  | 0.736530 | 4026.0  |

The result of Model Number:Dataset Number:Featuregroup Number:Rescale of 85 : 0 : 2 :  
1

|              | f1-score | precision | recall   | support |
|--------------|----------|-----------|----------|---------|
| AFIB         | 0.784607 | 0.822172  | 0.750510 | 204.0   |
| GSVT         | 0.826403 | 0.817556  | 0.835473 | 300.0   |
| SB           | 0.843956 | 0.839294  | 0.848681 | 892.0   |
| SR           | 0.834422 | 0.833699  | 0.835161 | 681.0   |
| macro avg    | 0.822347 | 0.828180  | 0.817456 | 2077.0  |
| micro avg    | 0.832698 | 0.832698  | 0.832698 | 2077.0  |
| weighted avg | 0.832466 | 0.832638  | 0.832698 | 2077.0  |

The result of Model Number:Dataset Number:Featuregroup Number:Rescale of 85 : 0 : 3 :  
0

|              | f1-score | precision | recall   | support |
|--------------|----------|-----------|----------|---------|
| AFIB         | 0.791486 | 0.799142  | 0.784118 | 204.0   |
| GSVT         | 0.819493 | 0.817877  | 0.821128 | 300.0   |
| SB           | 0.836622 | 0.835140  | 0.838120 | 892.0   |
| SR           | 0.828909 | 0.829310  | 0.828543 | 681.0   |
| macro avg    | 0.819127 | 0.820367  | 0.817977 | 2077.0  |
| micro avg    | 0.827222 | 0.827222  | 0.827222 | 2077.0  |
| weighted avg | 0.827186 | 0.827199  | 0.827222 | 2077.0  |

The result of Model Number:Dataset Number:Featuregroup Number:Rescale of 85 : 0 : 3 :  
1

|      | f1-score | precision | recall   | support |
|------|----------|-----------|----------|---------|
| AFIB | 0.747203 | 0.779565  | 0.717634 | 204.0   |

GSVT 0.698506 0.705024 0.692457 300.0  
SB 0.724052 0.688454 0.763583 892.0  
SR 0.645326 0.686051 0.609373 681.0  
macro avg 0.703772 0.714774 0.695762 2077.0  
micro avg 0.698235 0.698235 0.698235 2077.0  
weighted avg 0.696823 0.699008 0.698235 2077.0  
The result of Model Number:Dataset Number:Featuregroup Number:Rescale of 85 : 0 : 4 :  
0

f1-score precision recall support  
AFIB 0.820861 0.847526 0.795978 204.0  
GSVT 0.836422 0.828935 0.844212 300.0  
SB 0.856311 0.850442 0.862263 892.0  
SR 0.842346 0.845900 0.838871 681.0  
macro avg 0.838985 0.843201 0.835331 2077.0  
micro avg 0.845476 0.845476 0.845476 2077.0  
weighted avg 0.845378 0.845560 0.845476 2077.0  
The result of Model Number:Dataset Number:Featuregroup Number:Rescale of 85 : 0 : 4 :  
1

f1-score precision recall support  
AFIB 0.741904 0.761956 0.723034 204.0  
GSVT 0.748019 0.737007 0.759467 300.0  
SB 0.762508 0.754396 0.770799 892.0  
SR 0.748366 0.758648 0.738370 681.0  
macro avg 0.750199 0.753002 0.747917 2077.0  
micro avg 0.753838 0.753838 0.753838 2077.0  
weighted avg 0.753755 0.754021 0.753838 2077.0  
The result of Model Number:Dataset Number:Featuregroup Number:Rescale of 85 : 0 : 5 :  
0

f1-score precision recall support  
AFIB 0.832209 0.901681 0.774335 204.0  
GSVT 0.892640 0.881416 0.904518 300.0  
SB 0.915428 0.902604 0.928729 892.0  
SR 0.890457 0.894629 0.886758 681.0  
macro avg 0.882684 0.895082 0.873585 2077.0  
micro avg 0.896307 0.896307 0.896307 2077.0  
weighted avg 0.895776 0.896838 0.896307 2077.0  
The result of Model Number:Dataset Number:Featuregroup Number:Rescale of 85 : 0 : 5 :  
1

f1-score precision recall support  
AFIB 0.886126 0.896262 0.876561 204.0  
GSVT 0.906868 0.901501 0.912313 300.0  
SB 0.870576 0.838419 0.924858 892.0  
SR 0.730276 0.733810 0.726794 681.0  
macro avg 0.848462 0.842498 0.860132 2077.0

micro avg 0.853362 0.853362 0.853362 2077.0  
weighted avg 0.831344 0.818913 0.853362 2077.0  
The result of Model Number:Dataset Number:Featuregroup Number:Rescale of 85 : 0 : 6 :  
0

|              | f1-score | precision | recall   | support |
|--------------|----------|-----------|----------|---------|
| AFIB         | 0.832081 | 0.879416  | 0.790134 | 204.0   |
| GSVT         | 0.879322 | 0.869639  | 0.889267 | 300.0   |
| SB           | 0.892402 | 0.883523  | 0.901492 | 892.0   |
| SR           | 0.882035 | 0.885051  | 0.879180 | 681.0   |
| macro avg    | 0.871460 | 0.879407  | 0.865018 | 2077.0  |
| micro avg    | 0.881473 | 0.881473  | 0.881473 | 2077.0  |
| weighted avg | 0.881189 | 0.881615  | 0.881473 | 2077.0  |

The result of Model Number:Dataset Number:Featuregroup Number:Rescale of 85 : 0 : 6 :  
1

|              | f1-score | precision | recall   | support |
|--------------|----------|-----------|----------|---------|
| AFIB         | 0.770097 | 0.802667  | 0.740323 | 204.0   |
| GSVT         | 0.709204 | 0.710445  | 0.718605 | 300.0   |
| SB           | 0.763523 | 0.727150  | 0.804468 | 892.0   |
| SR           | 0.674992 | 0.729358  | 0.629390 | 681.0   |
| macro avg    | 0.729454 | 0.742405  | 0.723197 | 2077.0  |
| micro avg    | 0.728362 | 0.728362  | 0.728362 | 2077.0  |
| weighted avg | 0.727296 | 0.732878  | 0.728362 | 2077.0  |

The result of Model Number:Dataset Number:Featuregroup Number:Rescale of 85 : 0 : 7 :  
0

|              | f1-score | precision | recall   | support |
|--------------|----------|-----------|----------|---------|
| AFIB         | 0.848083 | 0.862808  | 0.833960 | 204.0   |
| GSVT         | 0.864795 | 0.862236  | 0.867388 | 300.0   |
| SB           | 0.874993 | 0.871880  | 0.878131 | 892.0   |
| SR           | 0.867879 | 0.868785  | 0.866994 | 681.0   |
| macro avg    | 0.863937 | 0.866427  | 0.861618 | 2077.0  |
| micro avg    | 0.868589 | 0.868589  | 0.868589 | 2077.0  |
| weighted avg | 0.868544 | 0.868581  | 0.868589 | 2077.0  |

The result of Model Number:Dataset Number:Featuregroup Number:Rescale of 85 : 0 : 7 :  
1

|              | f1-score | precision | recall   | support |
|--------------|----------|-----------|----------|---------|
| AFIB         | 0.708998 | 0.725155  | 0.693659 | 875.0   |
| GSVT         | 0.754464 | 0.755956  | 0.753231 | 691.0   |
| SB           | 0.825434 | 0.820917  | 0.830005 | 1553.0  |
| SR           | 0.780160 | 0.770696  | 0.789967 | 907.0   |
| macro avg    | 0.767264 | 0.768181  | 0.766715 | 4026.0  |
| micro avg    | 0.778175 | 0.778175  | 0.778175 | 4026.0  |
| weighted avg | 0.777748 | 0.777641  | 0.778175 | 4026.0  |

The result of Model Number:Dataset Number:Featuregroup Number:Rescale of 85 : 0 : 8 :  
0

f1-score precision recall support  
AFIB 0.833314 0.848607 0.818963 204.0  
GSVT 0.864948 0.857993 0.872174 300.0  
SB 0.880993 0.879420 0.882573 892.0  
SR 0.872270 0.873046 0.871499 681.0  
macro avg 0.862881 0.864767 0.861302 2077.0  
micro avg 0.871192 0.871192 0.871192 2077.0  
weighted avg 0.871132 0.871209 0.871192 2077.0  
The result of Model Number:Dataset Number:Featuregroup Number:Rescale of 85 : 0 : 8 :  
1

f1-score precision recall support  
AFIB 0.751143 0.756760 0.745638 204.0  
GSVT 0.770336 0.766271 0.774446 300.0  
SB 0.783337 0.782289 0.784389 892.0  
SR 0.776437 0.777926 0.774956 681.0  
macro avg 0.770313 0.770812 0.769857 2077.0  
micro avg 0.776054 0.776054 0.776054 2077.0  
weighted avg 0.776035 0.776038 0.776054 2077.0  
The result of Model Number:Dataset Number:Featuregroup Number:Rescale of 85 : 0 : 9 :  
0

f1-score precision recall support  
AFIB 0.726197 0.719704 0.732840 875.0  
GSVT 0.737857 0.740776 0.734987 691.0  
SB 0.786713 0.785253 0.788182 1553.0  
SR 0.766778 0.773866 0.759847 907.0  
macro avg 0.754386 0.754900 0.753964 4026.0  
micro avg 0.760641 0.760641 0.760641 4026.0  
weighted avg 0.760684 0.760808 0.760641 4026.0  
The result of Model Number:Dataset Number:Featuregroup Number:Rescale of 85 : 0 : 9 :  
1

f1-score precision recall support  
AFIB 0.658287 0.648948 0.667915 875.0  
GSVT 0.671830 0.678378 0.665412 691.0  
SB 0.714958 0.712628 0.717305 1553.0  
SR 0.698262 0.707186 0.689567 907.0  
macro avg 0.685834 0.686785 0.685050 4026.0  
micro avg 0.691415 0.691415 0.691415 4026.0  
weighted avg 0.691478 0.691684 0.691415 4026.0  
The result of Model Number:Dataset Number:Featuregroup Number:Rescale of 85 : 0 :  
10 : 0

f1-score precision recall support  
AFIB 0.919147 0.937666 0.901936 204.0  
GSVT 0.948640 0.941021 0.956566 300.0  
SB 0.969177 0.968201 0.970155 892.0

SR 0.960343 0.959791 0.960906 681.0  
macro avg 0.949327 0.951670 0.947391 2077.0  
micro avg 0.958459 0.958459 0.958459 2077.0  
weighted avg 0.958400 0.958519 0.958459 2077.0  
The result of Model Number:Dataset Number:Featuregroup Number:Rescale of 85 : 0 :  
10 : 1

f1-score precision recall support  
AFIB 0.647766 0.648888 0.646657 875.0  
GSVT 0.655620 0.648086 0.663384 691.0  
SB 0.690390 0.682065 0.698923 1553.0  
SR 0.657574 0.677498 0.638803 907.0  
macro avg 0.662837 0.664134 0.661942 4026.0  
micro avg 0.667920 0.667920 0.667920 4026.0  
weighted avg 0.667765 0.667994 0.667920 4026.0

The result of Model Number:Dataset Number:Featuregroup Number:Rescale of 85 : 1 : 0 :  
0

f1-score precision recall support  
AFIB 0.668031 0.660572 0.675667 875.0  
GSVT 0.681322 0.687562 0.675204 691.0  
SB 0.726661 0.724294 0.729046 1553.0  
SR 0.707823 0.714914 0.700874 907.0  
macro avg 0.695959 0.696836 0.695198 4026.0  
micro avg 0.701857 0.701857 0.701857 4026.0  
weighted avg 0.701893 0.702027 0.701857 4026.0

The result of Model Number:Dataset Number:Featuregroup Number:Rescale of 85 : 1 : 0 :  
1

f1-score precision recall support  
AFIB 0.668452 0.667377 0.669804 875.0  
GSVT 0.684038 0.680472 0.687680 691.0  
SB 0.715197 0.709138 0.721366 1553.0  
SR 0.687895 0.703188 0.673485 907.0  
macro avg 0.688895 0.690044 0.688084 4026.0  
micro avg 0.693591 0.693591 0.693591 4026.0  
weighted avg 0.693539 0.693801 0.693591 4026.0

The result of Model Number:Dataset Number:Featuregroup Number:Rescale of 85 : 1 : 1 :  
0

f1-score precision recall support  
AFIB 0.646855 0.704648 0.683093 204.0  
GSVT 0.878608 0.864246 0.893760 300.0  
SB 0.747967 0.742270 0.753808 892.0  
SR 0.914642 0.904293 0.925258 681.0  
macro avg 0.797018 0.803864 0.813980 2077.0  
micro avg 0.823291 0.823291 0.823291 2077.0  
weighted avg 0.811555 0.809317 0.823291 2077.0



The result of Model Number:Dataset Number:Featuregroup Number:Rescale of 85 : 1 : 1 : 1

|              | f1-score | precision | recall   | support |
|--------------|----------|-----------|----------|---------|
| AFIB         | 0.556842 | 0.517822  | 0.653906 | 875.0   |
| GSVT         | 0.477564 | 0.445873  | 0.540173 | 691.0   |
| SB           | 0.570658 | 0.565844  | 0.575569 | 1553.0  |
| SR           | 0.550032 | 0.563364  | 0.537508 | 907.0   |
| macro avg    | 0.538774 | 0.523226  | 0.576789 | 4026.0  |
| micro avg    | 0.577945 | 0.577945  | 0.577945 | 4026.0  |
| weighted avg | 0.547031 | 0.534257  | 0.577945 | 4026.0  |

The result of Model Number:Dataset Number:Featuregroup Number:Rescale of 85 : 1 : 2 : 0

|              | f1-score | precision | recall   | support |
|--------------|----------|-----------|----------|---------|
| AFIB         | 0.721060 | 0.727349  | 0.715060 | 204.0   |
| GSVT         | 0.745997 | 0.744779  | 0.747237 | 300.0   |
| SB           | 0.761854 | 0.759996  | 0.763730 | 892.0   |
| SR           | 0.754869 | 0.756007  | 0.753760 | 681.0   |
| macro avg    | 0.745945 | 0.747033  | 0.744947 | 2077.0  |
| micro avg    | 0.753299 | 0.753299  | 0.753299 | 2077.0  |
| weighted avg | 0.753267 | 0.753283  | 0.753299 | 2077.0  |

The result of Model Number:Dataset Number:Featuregroup Number:Rescale of 85 : 1 : 2 : 1

|              | f1-score | precision | recall   | support |
|--------------|----------|-----------|----------|---------|
| AFIB         | 0.731044 | 0.715339  | 0.747493 | 875.0   |
| GSVT         | 0.757073 | 0.768052  | 0.746453 | 691.0   |
| SB           | 0.805934 | 0.805780  | 0.806090 | 1553.0  |
| SR           | 0.785734 | 0.794867  | 0.776814 | 907.0   |
| macro avg    | 0.769946 | 0.771009  | 0.769212 | 4026.0  |
| micro avg    | 0.776523 | 0.776523  | 0.776523 | 4026.0  |
| weighted avg | 0.776720 | 0.777190  | 0.776523 | 4026.0  |

The result of Model Number:Dataset Number:Featuregroup Number:Rescale of 85 : 1 : 3 : 0

|              | f1-score | precision | recall   | support |
|--------------|----------|-----------|----------|---------|
| AFIB         | 0.854519 | 0.844549  | 0.866955 | 875.0   |
| GSVT         | 0.879248 | 0.868590  | 0.890878 | 691.0   |
| SB           | 0.892501 | 0.858050  | 0.943034 | 1553.0  |
| SR           | 0.708692 | 0.746075  | 0.674919 | 907.0   |
| macro avg    | 0.833740 | 0.829316  | 0.843946 | 4026.0  |
| micro avg    | 0.857145 | 0.857145  | 0.857145 | 4026.0  |
| weighted avg | 0.840562 | 0.831698  | 0.857145 | 4026.0  |

The result of Model Number:Dataset Number:Featuregroup Number:Rescale of 85 : 1 : 3 : 1

|      | f1-score | precision | recall   | support |
|------|----------|-----------|----------|---------|
| AFIB | 0.715549 | 0.713480  | 0.717695 | 875.0   |

GSVT 0.728811 0.728218 0.729455 691.0  
SB 0.774103 0.770896 0.777342 1553.0  
SR 0.750863 0.759112 0.742832 907.0  
macro avg 0.742331 0.742927 0.741831 4026.0  
micro avg 0.748385 0.748385 0.748385 4026.0  
weighted avg 0.748367 0.748438 0.748385 4026.0  
The result of Model Number:Dataset Number:Featuregroup Number:Rescale of 85 : 1 : 4 :  
0

f1-score precision recall support

AFIB 0.677421 0.678975 0.675947 875.0  
GSVT 0.679782 0.677866 0.681733 691.0  
SB 0.713421 0.707513 0.719438 1553.0  
SR 0.692019 0.702404 0.681965 907.0  
macro avg 0.690661 0.691690 0.689771 4026.0  
micro avg 0.695072 0.695072 0.695072 4026.0  
weighted avg 0.695002 0.695071 0.695072 4026.0  
The result of Model Number:Dataset Number:Featuregroup Number:Rescale of 85 : 1 : 4 :  
1

f1-score precision recall support

AFIB 0.842282 0.844419 0.840185 875.0  
GSVT 0.857145 0.847860 0.866671 691.0  
SB 0.903384 0.893165 0.913853 1553.0  
SR 0.862079 0.885681 0.839738 907.0  
macro avg 0.866223 0.867781 0.865112 4026.0  
micro avg 0.873047 0.873047 0.873047 4026.0  
weighted avg 0.872863 0.873109 0.873047 4026.0  
The result of Model Number:Dataset Number:Featuregroup Number:Rescale of 85 : 1 : 5 :  
0

f1-score precision recall support

AFIB 0.709797 0.725224 0.695207 204.0  
GSVT 0.739097 0.734737 0.743529 300.0  
SB 0.754976 0.753301 0.756666 892.0  
SR 0.747407 0.746985 0.747848 681.0  
macro avg 0.737819 0.740062 0.735813 2077.0  
micro avg 0.745841 0.745841 0.745841 2077.0  
weighted avg 0.745763 0.745791 0.745841 2077.0  
The result of Model Number:Dataset Number:Featuregroup Number:Rescale of 85 : 1 : 5 :  
1

f1-score precision recall support

AFIB 0.730496 0.737562 0.723696 204.0  
GSVT 0.756345 0.754854 0.757855 300.0  
SB 0.772154 0.770786 0.773537 892.0  
SR 0.765036 0.765406 0.764698 681.0  
macro avg 0.756008 0.757152 0.754947 2077.0

micro avg 0.763479 0.763479 0.763479 2077.0  
weighted avg 0.763445 0.763458 0.763479 2077.0  
The result of Model Number:Dataset Number:Featuregroup Number:Rescale of 85 : 1 : 6 :  
0

|              | f1-score | precision | recall   | support |
|--------------|----------|-----------|----------|---------|
| AFIB         | 0.813217 | 0.847169  | 0.782028 | 875.0   |
| GSVT         | 0.878558 | 0.874110  | 0.883158 | 691.0   |
| SB           | 0.963365 | 0.957944  | 0.968875 | 1553.0  |
| SR           | 0.902047 | 0.882016  | 0.923023 | 907.0   |
| macro avg    | 0.889297 | 0.890310  | 0.889271 | 4026.0  |
| micro avg    | 0.903224 | 0.903224  | 0.903224 | 4026.0  |
| weighted avg | 0.902362 | 0.902374  | 0.903224 | 4026.0  |

The result of Model Number:Dataset Number:Featuregroup Number:Rescale of 85 : 1 : 6 :  
1

|              | f1-score | precision | recall   | support |
|--------------|----------|-----------|----------|---------|
| AFIB         | 0.782184 | 0.789803  | 0.774901 | 204.0   |
| GSVT         | 0.800272 | 0.796597  | 0.804007 | 300.0   |
| SB           | 0.811331 | 0.808539  | 0.814148 | 892.0   |
| SR           | 0.804479 | 0.807600  | 0.801420 | 681.0   |
| macro avg    | 0.799566 | 0.800635  | 0.798619 | 2077.0  |
| micro avg    | 0.804655 | 0.804655  | 0.804655 | 2077.0  |
| weighted avg | 0.804624 | 0.804666  | 0.804655 | 2077.0  |

The result of Model Number:Dataset Number:Featuregroup Number:Rescale of 85 : 1 : 7 :  
0

|              | f1-score | precision | recall   | support |
|--------------|----------|-----------|----------|---------|
| AFIB         | 0.807886 | 0.815074  | 0.800867 | 875.0   |
| GSVT         | 0.824843 | 0.815792  | 0.834151 | 691.0   |
| SB           | 0.887114 | 0.880208  | 0.894138 | 1553.0  |
| SR           | 0.857634 | 0.869791  | 0.845816 | 907.0   |
| macro avg    | 0.844370 | 0.845216  | 0.843743 | 4026.0  |
| micro avg    | 0.852685 | 0.852685  | 0.852685 | 4026.0  |
| weighted avg | 0.852566 | 0.852649  | 0.852685 | 4026.0  |

The result of Model Number:Dataset Number:Featuregroup Number:Rescale of 85 : 1 : 7 :  
1

|              | f1-score | precision | recall   | support |
|--------------|----------|-----------|----------|---------|
| AFIB         | 0.688899 | 0.700860  | 0.677427 | 204.0   |
| GSVT         | 0.702474 | 0.700396  | 0.704580 | 300.0   |
| SB           | 0.710758 | 0.708229  | 0.713307 | 892.0   |
| SR           | 0.704979 | 0.705715  | 0.704261 | 681.0   |
| macro avg    | 0.701778 | 0.703800  | 0.699894 | 2077.0  |
| micro avg    | 0.705557 | 0.705557  | 0.705557 | 2077.0  |
| weighted avg | 0.705520 | 0.705550  | 0.705557 | 2077.0  |

The result of Model Number:Dataset Number:Featuregroup Number:Rescale of 85 : 1 : 8 :  
0

f1-score precision recall support  
AFIB 0.855233 0.866217 0.844566 875.0  
GSVT 0.864694 0.857701 0.871940 691.0  
SB 0.924975 0.922194 0.927775 1553.0  
SR 0.902071 0.901691 0.902462 907.0  
macro avg 0.886743 0.886951 0.886686 4026.0  
micro avg 0.894405 0.894405 0.894405 4026.0  
weighted avg 0.894311 0.894340 0.894405 4026.0  
The result of Model Number:Dataset Number:Featuregroup Number:Rescale of 85 : 1 : 8 :  
1

f1-score precision recall support  
AFIB 0.746764 0.736420 0.757432 875.0  
GSVT 0.763326 0.769504 0.757251 691.0  
SB 0.810262 0.807933 0.812609 1553.0  
SR 0.790551 0.800840 0.780530 907.0  
macro avg 0.777725 0.778674 0.776955 4026.0  
micro avg 0.783888 0.783888 0.783888 4026.0  
weighted avg 0.783965 0.784197 0.783888 4026.0  
The result of Model Number:Dataset Number:Featuregroup Number:Rescale of 85 : 1 : 9 :  
0

f1-score precision recall support  
AFIB 0.738675 0.811090 0.678852 204.0  
GSVT 0.866660 0.854979 0.878804 300.0  
SB 0.920122 0.917053 0.923216 892.0  
SR 0.896210 0.884194 0.908579 681.0  
macro avg 0.855417 0.866829 0.847363 2077.0  
micro avg 0.888001 0.888001 0.888001 2077.0  
weighted avg 0.886738 0.886906 0.888001 2077.0  
The result of Model Number:Dataset Number:Featuregroup Number:Rescale of 85 : 1 : 9 :  
1

f1-score precision recall support  
AFIB 0.826717 0.832621 0.821046 204.0  
GSVT 0.855625 0.855074 0.856194 300.0  
SB 0.872745 0.870808 0.874699 892.0  
SR 0.864943 0.865990 0.863926 681.0  
macro avg 0.855008 0.856123 0.853966 2077.0  
micro avg 0.863224 0.863224 0.863224 2077.0  
weighted avg 0.863193 0.863205 0.863224 2077.0  
The result of Model Number:Dataset Number:Featuregroup Number:Rescale of 85 : 1 :  
10 : 0

f1-score precision recall support  
AFIB 0.729104 0.733456 0.724823 204.0  
GSVT 0.747019 0.743811 0.750255 300.0  
SB 0.759812 0.758712 0.760919 892.0

SR 0.752865 0.754420 0.751320 681.0  
macro avg 0.747200 0.747600 0.746829 2077.0  
micro avg 0.752686 0.752686 0.752686 2077.0  
weighted avg 0.752670 0.752672 0.752686 2077.0  
The result of Model Number:Dataset Number:Featuregroup Number:Rescale of 85 : 1 :  
10 : 1

f1-score precision recall support  
AFIB 0.865272 0.885039 0.846587 204.0  
GSVT 0.904580 0.898949 0.910304 300.0  
SB 0.924116 0.921250 0.927013 892.0  
SR 0.913533 0.913955 0.913135 681.0  
macro avg 0.901875 0.904798 0.899260 2077.0  
micro avg 0.912150 0.912150 0.912150 2077.0  
weighted avg 0.912045 0.912080 0.912150 2077.0

The result of Model Number:Dataset Number:Featuregroup Number:Rescale of 86 : 0 : 0 :  
0

f1-score precision recall support  
AFIB 0.777013 0.774497 0.779569 875.0  
GSVT 0.786023 0.788465 0.783674 691.0  
SB 0.829382 0.827577 0.831198 1553.0  
SR 0.814087 0.817928 0.810313 907.0  
macro avg 0.801626 0.802117 0.801189 4026.0  
micro avg 0.807115 0.807115 0.807115 4026.0  
weighted avg 0.807113 0.807154 0.807115 4026.0

The result of Model Number:Dataset Number:Featuregroup Number:Rescale of 86 : 0 : 0 :  
1

f1-score precision recall support  
AFIB 0.683633 0.673151 0.694560 875.0  
GSVT 0.707206 0.714137 0.700546 691.0  
SB 0.752656 0.750897 0.754446 1553.0  
SR 0.733854 0.743159 0.724795 907.0  
macro avg 0.719337 0.720336 0.718587 4026.0  
micro avg 0.725500 0.725500 0.725500 4026.0  
weighted avg 0.725618 0.725947 0.725500 4026.0

The result of Model Number:Dataset Number:Featuregroup Number:Rescale of 86 : 0 : 1 :  
0

f1-score precision recall support  
AFIB 0.765497 0.769519 0.761564 875.0  
GSVT 0.778416 0.779861 0.777074 691.0  
SB 0.824449 0.818594 0.830393 1553.0  
SR 0.808641 0.813624 0.803739 907.0  
macro avg 0.794251 0.795399 0.793192 4026.0  
micro avg 0.800278 0.800278 0.800278 4026.0  
weighted avg 0.800174 0.800160 0.800278 4026.0

The result of Model Number:Dataset Number:Featuregroup Number:Rescale of 86 : 0 : 1 :  
1

|              | f1-score | precision | recall   | support |
|--------------|----------|-----------|----------|---------|
| AFIB         | 0.793645 | 0.813408  | 0.774858 | 875.0   |
| GSVT         | 0.838543 | 0.842103  | 0.835048 | 691.0   |
| SB           | 0.909552 | 0.906072  | 0.913065 | 1553.0  |
| SR           | 0.865184 | 0.849062  | 0.881976 | 907.0   |
| macro avg    | 0.851731 | 0.852661  | 0.851237 | 4026.0  |
| micro avg    | 0.862633 | 0.862633  | 0.862633 | 4026.0  |
| weighted avg | 0.862178 | 0.862110  | 0.862633 | 4026.0  |

The result of Model Number:Dataset Number:Featuregroup Number:Rescale of 86 : 0 : 2 :  
0

|              | f1-score | precision | recall   | support |
|--------------|----------|-----------|----------|---------|
| AFIB         | 0.671934 | 0.702276  | 0.644324 | 204.0   |
| GSVT         | 0.695304 | 0.687496  | 0.703419 | 300.0   |
| SB           | 0.668857 | 0.639696  | 0.715687 | 892.0   |
| SR           | 0.557250 | 0.562001  | 0.552673 | 681.0   |
| macro avg    | 0.648336 | 0.647867  | 0.654026 | 2077.0  |
| micro avg    | 0.653457 | 0.653457  | 0.653457 | 2077.0  |
| weighted avg | 0.636386 | 0.627272  | 0.653457 | 2077.0  |

The result of Model Number:Dataset Number:Featuregroup Number:Rescale of 86 : 0 : 2 :  
1

|              | f1-score | precision | recall   | support |
|--------------|----------|-----------|----------|---------|
| AFIB         | 0.747975 | 0.748174  | 0.747906 | 875.0   |
| GSVT         | 0.761000 | 0.758190  | 0.763926 | 691.0   |
| SB           | 0.814121 | 0.812145  | 0.816111 | 1553.0  |
| SR           | 0.794705 | 0.800409  | 0.789104 | 907.0   |
| macro avg    | 0.779450 | 0.779730  | 0.779262 | 4026.0  |
| micro avg    | 0.786246 | 0.786246  | 0.786246 | 4026.0  |
| weighted avg | 0.786253 | 0.786337  | 0.786246 | 4026.0  |

The result of Model Number:Dataset Number:Featuregroup Number:Rescale of 86 : 0 : 3 :  
0

|              | f1-score | precision | recall   | support |
|--------------|----------|-----------|----------|---------|
| AFIB         | 0.897145 | 0.915963  | 0.879108 | 204.0   |
| GSVT         | 0.917956 | 0.912525  | 0.923462 | 300.0   |
| SB           | 0.940335 | 0.938133  | 0.942549 | 892.0   |
| SR           | 0.932393 | 0.932125  | 0.932669 | 681.0   |
| macro avg    | 0.921957 | 0.924686  | 0.919447 | 2077.0  |
| micro avg    | 0.930322 | 0.930322  | 0.930322 | 2077.0  |
| weighted avg | 0.930257 | 0.930287  | 0.930322 | 2077.0  |

The result of Model Number:Dataset Number:Featuregroup Number:Rescale of 86 : 0 : 3 :  
1

|      | f1-score | precision | recall   | support |
|------|----------|-----------|----------|---------|
| AFIB | 0.801683 | 0.835589  | 0.770688 | 204.0   |

GSVT 0.738292 0.739584 0.748079 300.0  
SB 0.794839 0.756974 0.837463 892.0  
SR 0.702677 0.759272 0.655205 681.0  
macro avg 0.759373 0.772855 0.752859 2077.0  
micro avg 0.758236 0.758236 0.758236 2077.0  
weighted avg 0.757126 0.762937 0.758236 2077.0  
The result of Model Number:Dataset Number:Featuregroup Number:Rescale of 86 : 0 : 4 :  
0

f1-score precision recall support

AFIB 0.722004 0.745458 0.700118 204.0  
GSVT 0.735691 0.729106 0.742543 300.0  
SB 0.753185 0.748023 0.758421 892.0  
SR 0.740902 0.744028 0.737846 681.0  
macro avg 0.737946 0.741654 0.734732 2077.0  
micro avg 0.743655 0.743655 0.743655 2077.0  
weighted avg 0.743569 0.743729 0.743655 2077.0  
The result of Model Number:Dataset Number:Featuregroup Number:Rescale of 86 : 0 : 4 :  
1

f1-score precision recall support

AFIB 0.736617 0.742440 0.730909 875.0  
GSVT 0.755152 0.753556 0.756784 691.0  
SB 0.805014 0.797899 0.812268 1553.0  
SR 0.783584 0.791269 0.776066 907.0  
macro avg 0.770092 0.771291 0.769006 4026.0  
micro avg 0.776907 0.776907 0.776907 4026.0  
weighted avg 0.776763 0.776741 0.776907 4026.0  
The result of Model Number:Dataset Number:Featuregroup Number:Rescale of 86 : 0 : 5 :  
0

f1-score precision recall support

AFIB 0.671397 0.680101 0.663092 204.0  
GSVT 0.697376 0.696925 0.697849 300.0  
SB 0.712070 0.710567 0.713585 892.0  
SR 0.704909 0.704508 0.705325 681.0  
macro avg 0.696438 0.698025 0.694963 2077.0  
micro avg 0.703645 0.703645 0.703645 2077.0  
weighted avg 0.703605 0.703618 0.703645 2077.0  
The result of Model Number:Dataset Number:Featuregroup Number:Rescale of 86 : 0 : 5 :  
1

f1-score precision recall support

AFIB 0.783510 0.785308 0.781806 875.0  
GSVT 0.786241 0.784025 0.788497 691.0  
SB 0.825148 0.818315 0.832107 1553.0  
SR 0.800394 0.812406 0.788766 907.0  
macro avg 0.798823 0.800013 0.797794 4026.0

micro avg 0.803926 0.803926 0.803926 4026.0  
weighted avg 0.803844 0.803925 0.803926 4026.0  
The result of Model Number:Dataset Number:Featuregroup Number:Rescale of 86 : 0 : 6 :  
0

|              | f1-score | precision | recall   | support |
|--------------|----------|-----------|----------|---------|
| AFIB         | 0.690087 | 0.685574  | 0.694719 | 875.0   |
| GSVT         | 0.710597 | 0.716643  | 0.704747 | 691.0   |
| SB           | 0.756527 | 0.754879  | 0.758183 | 1553.0  |
| SR           | 0.738090 | 0.741053  | 0.735161 | 907.0   |
| macro avg    | 0.723825 | 0.724537  | 0.723202 | 4026.0  |
| micro avg    | 0.730032 | 0.730032  | 0.730032 | 4026.0  |
| weighted avg | 0.730050 | 0.730139  | 0.730032 | 4026.0  |

The result of Model Number:Dataset Number:Featuregroup Number:Rescale of 86 : 0 : 6 :  
1

|              | f1-score | precision | recall   | support |
|--------------|----------|-----------|----------|---------|
| AFIB         | 0.727667 | 0.733435  | 0.722008 | 875.0   |
| GSVT         | 0.736893 | 0.733644  | 0.740195 | 691.0   |
| SB           | 0.783598 | 0.780501  | 0.786727 | 1553.0  |
| SR           | 0.764343 | 0.766502  | 0.762232 | 907.0   |
| macro avg    | 0.753125 | 0.753521  | 0.752790 | 4026.0  |
| micro avg    | 0.759156 | 0.759156  | 0.759156 | 4026.0  |
| weighted avg | 0.759088 | 0.759076  | 0.759156 | 4026.0  |

The result of Model Number:Dataset Number:Featuregroup Number:Rescale of 86 : 0 : 7 :  
0

|              | f1-score | precision | recall   | support |
|--------------|----------|-----------|----------|---------|
| AFIB         | 0.740265 | 0.832363  | 0.667170 | 204.0   |
| GSVT         | 0.878270 | 0.859516  | 0.897900 | 300.0   |
| SB           | 0.937570 | 0.932790  | 0.942403 | 892.0   |
| SR           | 0.916536 | 0.904930  | 0.928503 | 681.0   |
| macro avg    | 0.868160 | 0.882400  | 0.858994 | 2077.0  |
| micro avg    | 0.904385 | 0.904385  | 0.904385 | 2077.0  |
| weighted avg | 0.902729 | 0.903208  | 0.904385 | 2077.0  |

The result of Model Number:Dataset Number:Featuregroup Number:Rescale of 86 : 0 : 7 :  
1

|              | f1-score | precision | recall   | support |
|--------------|----------|-----------|----------|---------|
| AFIB         | 0.740993 | 0.815753  | 0.679220 | 204.0   |
| GSVT         | 0.873847 | 0.861785  | 0.886391 | 300.0   |
| SB           | 0.927856 | 0.924761  | 0.930977 | 892.0   |
| SR           | 0.904095 | 0.891587  | 0.916971 | 681.0   |
| macro avg    | 0.861698 | 0.873471  | 0.853390 | 2077.0  |
| micro avg    | 0.895217 | 0.895217  | 0.895217 | 2077.0  |
| weighted avg | 0.893911 | 0.894081  | 0.895217 | 2077.0  |

The result of Model Number:Dataset Number:Featuregroup Number:Rescale of 86 : 0 : 8 :  
0



f1-score precision recall support  
AFIB 0.754888 0.756196 0.753596 875.0  
GSVT 0.764041 0.755262 0.773090 691.0  
SB 0.804561 0.794860 0.814506 1553.0  
SR 0.766318 0.789538 0.744443 907.0  
macro avg 0.772452 0.773964 0.771409 4026.0  
micro avg 0.778375 0.778375 0.778375 4026.0  
weighted avg 0.778195 0.778461 0.778375 4026.0  
The result of Model Number:Dataset Number:Featuregroup Number:Rescale of 86 : 0 : 8 :  
1

f1-score precision recall support  
AFIB 0.833152 0.828487 0.837909 875.0  
GSVT 0.839936 0.844892 0.835090 691.0  
SB 0.884804 0.882034 0.887593 1553.0  
SR 0.867287 0.873025 0.861644 907.0  
macro avg 0.856295 0.857110 0.855559 4026.0  
micro avg 0.861938 0.861938 0.861938 4026.0  
weighted avg 0.861931 0.861992 0.861938 4026.0  
The result of Model Number:Dataset Number:Featuregroup Number:Rescale of 86 : 0 : 9 :  
0

f1-score precision recall support  
AFIB 0.699814 0.747597 0.658071 204.0  
GSVT 0.739773 0.724698 0.755553 300.0  
SB 0.758122 0.751476 0.764916 892.0  
SR 0.739422 0.741884 0.737042 681.0  
macro avg 0.734283 0.741414 0.728896 2077.0  
micro avg 0.743930 0.743930 0.743930 2077.0  
weighted avg 0.743614 0.744082 0.743930 2077.0  
The result of Model Number:Dataset Number:Featuregroup Number:Rescale of 86 : 0 : 9 :  
1

f1-score precision recall support  
AFIB 0.754900 0.769656 0.740832 204.0  
GSVT 0.775643 0.770055 0.781340 300.0  
SB 0.789525 0.786453 0.792623 892.0  
SR 0.780895 0.783105 0.778715 681.0  
macro avg 0.775241 0.777317 0.773377 2077.0  
micro avg 0.781346 0.781346 0.781346 2077.0  
weighted avg 0.781290 0.781337 0.781346 2077.0  
The result of Model Number:Dataset Number:Featuregroup Number:Rescale of 86 : 0 :  
10 : 0

f1-score precision recall support  
AFIB 0.920611 0.937697 0.904366 204.0  
GSVT 0.940855 0.935921 0.945860 300.0  
SB 0.955875 0.952477 0.959303 892.0

SR 0.946034 0.947739 0.944376 681.0  
macro avg 0.940844 0.943459 0.938476 2077.0  
micro avg 0.947071 0.947071 0.947071 2077.0  
weighted avg 0.947016 0.947081 0.947071 2077.0  
The result of Model Number:Dataset Number:Featuregroup Number:Rescale of 86 : 0 :  
10 : 1

f1-score precision recall support  
AFIB 0.867280 0.909325 0.829048 204.0  
GSVT 0.903400 0.891596 0.915705 300.0  
SB 0.927732 0.920677 0.934909 892.0  
SR 0.901901 0.904596 0.899262 681.0  
macro avg 0.900078 0.906549 0.894731 2077.0  
micro avg 0.910050 0.910050 0.910050 2077.0  
weighted avg 0.909811 0.910089 0.910050 2077.0

The result of Model Number:Dataset Number:Featuregroup Number:Rescale of 86 : 1 : 0 :  
0

f1-score precision recall support  
AFIB 0.898819 0.912446 0.885615 204.0  
GSVT 0.913271 0.905572 0.921150 300.0  
SB 0.933529 0.930518 0.936562 892.0  
SR 0.923508 0.926938 0.920128 681.0  
macro avg 0.917282 0.918868 0.915864 2077.0  
micro avg 0.923944 0.923944 0.923944 2077.0  
weighted avg 0.923908 0.923966 0.923944 2077.0

The result of Model Number:Dataset Number:Featuregroup Number:Rescale of 86 : 1 : 0 :  
1

f1-score precision recall support  
AFIB 0.760644 0.778557 0.743602 875.0  
GSVT 0.801831 0.803856 0.799869 691.0  
SB 0.872006 0.868391 0.875655 1553.0  
SR 0.829719 0.816652 0.843251 907.0  
macro avg 0.816050 0.816864 0.815594 4026.0  
micro avg 0.826647 0.826647 0.826647 4026.0  
weighted avg 0.826232 0.826134 0.826647 4026.0

The result of Model Number:Dataset Number:Featuregroup Number:Rescale of 86 : 1 : 1 :  
0

f1-score precision recall support  
AFIB 0.839506 0.843504 0.835583 875.0  
GSVT 0.849877 0.834432 0.865991 691.0  
SB 0.899234 0.895791 0.902707 1553.0  
SR 0.872655 0.887592 0.858226 907.0  
macro avg 0.865318 0.865329 0.865627 4026.0  
micro avg 0.871796 0.871796 0.871796 4026.0  
weighted avg 0.871794 0.872048 0.871796 4026.0

The result of Model Number:Dataset Number:Featuregroup Number:Rescale of 86 : 1 : 1 :  
1

|              | f1-score | precision | recall   | support |
|--------------|----------|-----------|----------|---------|
| AFIB         | 0.817505 | 0.835992  | 0.799843 | 875.0   |
| GSVT         | 0.866741 | 0.870430  | 0.863135 | 691.0   |
| SB           | 0.941101 | 0.936666  | 0.945584 | 1553.0  |
| SR           | 0.891681 | 0.878003  | 0.905828 | 907.0   |
| macro avg    | 0.879257 | 0.880273  | 0.878597 | 4026.0  |
| micro avg    | 0.890801 | 0.890801  | 0.890801 | 4026.0  |
| weighted avg | 0.890343 | 0.890201  | 0.890801 | 4026.0  |

The result of Model Number:Dataset Number:Featuregroup Number:Rescale of 86 : 1 : 2 :  
0

|              | f1-score | precision | recall   | support |
|--------------|----------|-----------|----------|---------|
| AFIB         | 0.693867 | 0.701979  | 0.686073 | 204.0   |
| GSVT         | 0.712955 | 0.709676  | 0.716283 | 300.0   |
| SB           | 0.723049 | 0.720800  | 0.725316 | 892.0   |
| SR           | 0.716822 | 0.718854  | 0.714832 | 681.0   |
| macro avg    | 0.711673 | 0.712827  | 0.710626 | 2077.0  |
| micro avg    | 0.716720 | 0.716720  | 0.716720 | 2077.0  |
| weighted avg | 0.716683 | 0.716707  | 0.716720 | 2077.0  |

The result of Model Number:Dataset Number:Featuregroup Number:Rescale of 86 : 1 : 2 :  
1

|              | f1-score | precision | recall   | support |
|--------------|----------|-----------|----------|---------|
| AFIB         | 0.871272 | 0.899199  | 0.845287 | 204.0   |
| GSVT         | 0.897337 | 0.881900  | 0.913458 | 300.0   |
| SB           | 0.912860 | 0.903836  | 0.922069 | 892.0   |
| SR           | 0.888452 | 0.899570  | 0.877625 | 681.0   |
| macro avg    | 0.892480 | 0.896126  | 0.889610 | 2077.0  |
| micro avg    | 0.898712 | 0.898712  | 0.898712 | 2077.0  |
| weighted avg | 0.898531 | 0.898813  | 0.898712 | 2077.0  |

The result of Model Number:Dataset Number:Featuregroup Number:Rescale of 86 : 1 : 3 :  
0

|              | f1-score | precision | recall   | support |
|--------------|----------|-----------|----------|---------|
| AFIB         | 0.658421 | 0.644277  | 0.673236 | 875.0   |
| GSVT         | 0.681865 | 0.691753  | 0.672300 | 691.0   |
| SB           | 0.725872 | 0.725733  | 0.726013 | 1553.0  |
| SR           | 0.707679 | 0.715904  | 0.699644 | 907.0   |
| macro avg    | 0.693459 | 0.694417  | 0.692798 | 4026.0  |
| micro avg    | 0.699383 | 0.699383  | 0.699383 | 4026.0  |
| weighted avg | 0.699560 | 0.699983  | 0.699383 | 4026.0  |

The result of Model Number:Dataset Number:Featuregroup Number:Rescale of 86 : 1 : 3 :  
1

|      | f1-score | precision | recall   | support |
|------|----------|-----------|----------|---------|
| AFIB | 0.643269 | 0.653715  | 0.633186 | 875.0   |

GSVT 0.684135 0.686279 0.682046 691.0  
SB 0.744305 0.741740 0.746891 1553.0  
SR 0.704640 0.696791 0.712710 907.0  
macro avg 0.694087 0.694631 0.693708 4026.0  
micro avg 0.703349 0.703349 0.703349 4026.0  
weighted avg 0.703083 0.702964 0.703349 4026.0  
The result of Model Number:Dataset Number:Featuregroup Number:Rescale of 86 : 1 : 4 :  
0

f1-score precision recall support  
AFIB 0.826662 0.820297 0.833189 875.0  
GSVT 0.837394 0.841282 0.833725 691.0  
SB 0.897385 0.892611 0.902229 1553.0  
SR 0.870945 0.883190 0.859131 907.0  
macro avg 0.858096 0.859345 0.857069 4026.0  
micro avg 0.865757 0.865757 0.865757 4026.0  
weighted avg 0.865761 0.865962 0.865757 4026.0  
The result of Model Number:Dataset Number:Featuregroup Number:Rescale of 86 : 1 : 4 :  
1

f1-score precision recall support  
AFIB 0.828600 0.832371 0.824914 875.0  
GSVT 0.832626 0.824327 0.841165 691.0  
SB 0.877590 0.868027 0.887366 1553.0  
SR 0.839320 0.859190 0.820351 907.0  
macro avg 0.844534 0.845979 0.843449 4026.0  
micro avg 0.850766 0.850766 0.850766 4026.0  
weighted avg 0.850603 0.850786 0.850766 4026.0  
The result of Model Number:Dataset Number:Featuregroup Number:Rescale of 86 : 1 : 5 :  
0

f1-score precision recall support  
AFIB 0.801399 0.835293 0.770415 204.0  
GSVT 0.738030 0.739322 0.747813 300.0  
SB 0.794558 0.756706 0.837167 892.0  
SR 0.702428 0.759003 0.654972 681.0  
macro avg 0.759104 0.772581 0.752592 2077.0  
micro avg 0.757967 0.757967 0.757967 2077.0  
weighted avg 0.756858 0.762667 0.757967 2077.0  
The result of Model Number:Dataset Number:Featuregroup Number:Rescale of 86 : 1 : 5 :  
1

f1-score precision recall support  
AFIB 0.767844 0.757650 0.778375 875.0  
GSVT 0.783429 0.790856 0.776174 691.0  
SB 0.833680 0.831708 0.835666 1553.0  
SR 0.811064 0.819592 0.802745 907.0  
macro avg 0.799004 0.799951 0.798240 4026.0

micro avg 0.805587 0.805587 0.805587 4026.0  
weighted avg 0.805651 0.805871 0.805587 4026.0  
The result of Model Number:Dataset Number:Featuregroup Number:Rescale of 86 : 1 : 6 :  
0

|              | f1-score | precision | recall   | support |
|--------------|----------|-----------|----------|---------|
| AFIB         | 0.686558 | 0.695649  | 0.677803 | 204.0   |
| GSVT         | 0.707276 | 0.704723  | 0.709863 | 300.0   |
| SB           | 0.716085 | 0.713857  | 0.718331 | 892.0   |
| SR           | 0.708282 | 0.709647  | 0.706943 | 681.0   |
| macro avg    | 0.704550 | 0.705969  | 0.703235 | 2077.0  |
| micro avg    | 0.709393 | 0.709393  | 0.709393 | 2077.0  |
| weighted avg | 0.709354 | 0.709369  | 0.709393 | 2077.0  |

The result of Model Number:Dataset Number:Featuregroup Number:Rescale of 86 : 1 : 6 :  
1

|              | f1-score | precision | recall   | support |
|--------------|----------|-----------|----------|---------|
| AFIB         | 0.746119 | 0.748307  | 0.744002 | 875.0   |
| GSVT         | 0.758465 | 0.748723  | 0.768562 | 691.0   |
| SB           | 0.802709 | 0.800758  | 0.804673 | 1553.0  |
| SR           | 0.782383 | 0.791668  | 0.773322 | 907.0   |
| macro avg    | 0.772419 | 0.772364  | 0.772640 | 4026.0  |
| micro avg    | 0.778226 | 0.778226  | 0.778226 | 4026.0  |
| weighted avg | 0.778237 | 0.778380  | 0.778226 | 4026.0  |

The result of Model Number:Dataset Number:Featuregroup Number:Rescale of 86 : 1 : 7 :  
0

|              | f1-score | precision | recall   | support |
|--------------|----------|-----------|----------|---------|
| AFIB         | 0.837794 | 0.830029  | 0.845753 | 875.0   |
| GSVT         | 0.852840 | 0.857471  | 0.848272 | 691.0   |
| SB           | 0.903632 | 0.901549  | 0.905726 | 1553.0  |
| SR           | 0.882579 | 0.890723  | 0.874609 | 907.0   |
| macro avg    | 0.869211 | 0.869943  | 0.868590 | 4026.0  |
| micro avg    | 0.875820 | 0.875820  | 0.875820 | 4026.0  |
| weighted avg | 0.875862 | 0.876001  | 0.875820 | 4026.0  |

The result of Model Number:Dataset Number:Featuregroup Number:Rescale of 86 : 1 : 7 :  
1

|              | f1-score | precision | recall   | support |
|--------------|----------|-----------|----------|---------|
| AFIB         | 0.883624 | 0.876820  | 0.890601 | 875.0   |
| GSVT         | 0.895096 | 0.899252  | 0.891174 | 691.0   |
| SB           | 0.959220 | 0.954118  | 0.964399 | 1553.0  |
| SR           | 0.930959 | 0.944047  | 0.918330 | 907.0   |
| macro avg    | 0.917225 | 0.918559  | 0.916126 | 4026.0  |
| micro avg    | 0.925413 | 0.925413  | 0.925413 | 4026.0  |
| weighted avg | 0.925418 | 0.925633  | 0.925413 | 4026.0  |

The result of Model Number:Dataset Number:Featuregroup Number:Rescale of 86 : 1 : 8 :  
0

f1-score precision recall support  
AFIB 0.618542 0.628587 0.608847 875.0  
GSVT 0.657838 0.659899 0.655829 691.0  
SB 0.715694 0.713228 0.718182 1553.0  
SR 0.677554 0.670007 0.685314 907.0  
macro avg 0.667407 0.667930 0.667043 4026.0  
micro avg 0.676313 0.676313 0.676313 4026.0  
weighted avg 0.676057 0.675942 0.676313 4026.0  
The result of Model Number:Dataset Number:Featuregroup Number:Rescale of 86 : 1 : 8 :  
1

f1-score precision recall support  
AFIB 0.703493 0.704445 0.702679 875.0  
GSVT 0.714450 0.714083 0.714845 691.0  
SB 0.746170 0.743500 0.748861 1553.0  
SR 0.728301 0.732383 0.724311 907.0  
macro avg 0.723104 0.723603 0.722674 4026.0  
micro avg 0.727455 0.727455 0.727455 4026.0  
weighted avg 0.727425 0.727458 0.727455 4026.0  
The result of Model Number:Dataset Number:Featuregroup Number:Rescale of 86 : 1 : 9 :  
0

f1-score precision recall support  
AFIB 0.831981 0.820458 0.843867 875.0  
GSVT 0.850434 0.857317 0.843666 691.0  
SB 0.902726 0.900132 0.905340 1553.0  
SR 0.880765 0.892229 0.869601 907.0  
macro avg 0.866477 0.867534 0.865619 4026.0  
micro avg 0.873343 0.873343 0.873343 4026.0  
weighted avg 0.873428 0.873687 0.873343 4026.0  
The result of Model Number:Dataset Number:Featuregroup Number:Rescale of 86 : 1 : 9 :  
1

f1-score precision recall support  
AFIB 0.671377 0.677418 0.665653 875.0  
GSVT 0.685053 0.671162 0.699692 691.0  
SB 0.726503 0.718421 0.734856 1553.0  
SR 0.697674 0.718413 0.678263 907.0  
macro avg 0.695152 0.696353 0.694616 4026.0  
micro avg 0.701031 0.701031 0.701031 4026.0  
weighted avg 0.700913 0.701396 0.701031 4026.0  
The result of Model Number:Dataset Number:Featuregroup Number:Rescale of 86 : 1 :  
10 : 0

f1-score precision recall support  
AFIB 0.709746 0.694579 0.725631 875.0  
GSVT 0.734987 0.746226 0.724147 691.0  
SB 0.783495 0.783598 0.783394 1553.0

SR 0.763310 0.771215 0.755568 907.0  
macro avg 0.747884 0.748905 0.747185 4026.0  
micro avg 0.754403 0.754403 0.754403 4026.0  
weighted avg 0.754593 0.755047 0.754403 4026.0  
The result of Model Number:Dataset Number:Featuregroup Number:Rescale of 86 : 1 :  
10 : 1

f1-score precision recall support  
AFIB 0.824655 0.828446 0.820940 875.0  
GSVT 0.790378 0.795140 0.785699 691.0  
SB 0.847809 0.810018 0.889341 1553.0  
SR 0.725063 0.789325 0.670622 907.0  
macro avg 0.796976 0.805732 0.791650 4026.0  
micro avg 0.807412 0.807412 0.807412 4026.0  
weighted avg 0.805267 0.806808 0.807412 4026.0

The result of Model Number:Dataset Number:Featuregroup Number:Rescale of 87 : 0 : 0 :  
0

f1-score precision recall support  
AFIB 0.679195 0.716141 0.646047 204.0  
GSVT 0.713029 0.702245 0.724178 300.0  
SB 0.729973 0.725225 0.734796 892.0  
SR 0.720967 0.721617 0.720336 681.0  
macro avg 0.710791 0.716307 0.706339 2077.0  
micro avg 0.719804 0.719804 0.719804 2077.0  
weighted avg 0.719586 0.719830 0.719804 2077.0

The result of Model Number:Dataset Number:Featuregroup Number:Rescale of 87 : 0 : 0 :  
1

f1-score precision recall support  
AFIB 0.845108 0.883270 0.810383 204.0  
GSVT 0.874502 0.864681 0.884708 300.0  
SB 0.841238 0.804562 0.900137 892.0  
SR 0.700867 0.706843 0.695110 681.0  
macro avg 0.815429 0.814839 0.822585 2077.0  
micro avg 0.821870 0.821870 0.821870 2077.0  
weighted avg 0.800399 0.788936 0.821870 2077.0

The result of Model Number:Dataset Number:Featuregroup Number:Rescale of 87 : 0 : 1 :  
0

f1-score precision recall support  
AFIB 0.637830 0.622965 0.653526 875.0  
GSVT 0.612294 0.619025 0.605750 691.0  
SB 0.644342 0.602734 0.692135 1553.0  
SR 0.515695 0.619250 0.442088 907.0  
macro avg 0.602541 0.615994 0.598375 4026.0  
micro avg 0.612585 0.612585 0.612585 4026.0  
weighted avg 0.608444 0.613648 0.612585 4026.0

The result of Model Number:Dataset Number:Featuregroup Number:Rescale of 87 : 0 : 1 : 1

|              | f1-score | precision | recall   | support |
|--------------|----------|-----------|----------|---------|
| AFIB         | 0.691599 | 0.709410  | 0.674688 | 204.0   |
| GSVT         | 0.634663 | 0.606411  | 0.716216 | 300.0   |
| SB           | 0.728141 | 0.726438  | 0.729855 | 892.0   |
| SR           | 0.577648 | 0.577757  | 0.577547 | 681.0   |
| macro avg    | 0.658013 | 0.655004  | 0.674577 | 2077.0  |
| micro avg    | 0.672528 | 0.672528  | 0.672528 | 2077.0  |
| weighted avg | 0.661707 | 0.658680  | 0.672528 | 2077.0  |

The result of Model Number:Dataset Number:Featuregroup Number:Rescale of 87 : 0 : 2 : 0

|              | f1-score | precision | recall   | support |
|--------------|----------|-----------|----------|---------|
| AFIB         | 0.808753 | 0.812604  | 0.804974 | 875.0   |
| GSVT         | 0.818744 | 0.803864  | 0.834268 | 691.0   |
| SB           | 0.866293 | 0.862975  | 0.869638 | 1553.0  |
| SR           | 0.840687 | 0.855077  | 0.826787 | 907.0   |
| macro avg    | 0.833619 | 0.833630  | 0.833917 | 4026.0  |
| micro avg    | 0.839860 | 0.839860  | 0.839860 | 4026.0  |
| weighted avg | 0.839857 | 0.840103  | 0.839860 | 4026.0  |

The result of Model Number:Dataset Number:Featuregroup Number:Rescale of 87 : 0 : 2 : 1

|              | f1-score | precision | recall   | support |
|--------------|----------|-----------|----------|---------|
| AFIB         | 0.721715 | 0.701697  | 0.745179 | 875.0   |
| GSVT         | 0.731136 | 0.761933  | 0.707231 | 691.0   |
| SB           | 0.803179 | 0.802773  | 0.803595 | 1553.0  |
| SR           | 0.783029 | 0.787929  | 0.778195 | 907.0   |
| macro avg    | 0.759765 | 0.763583  | 0.758550 | 4026.0  |
| micro avg    | 0.768638 | 0.768638  | 0.768638 | 4026.0  |
| weighted avg | 0.768569 | 0.770452  | 0.768638 | 4026.0  |

The result of Model Number:Dataset Number:Featuregroup Number:Rescale of 87 : 0 : 3 : 0

|              | f1-score | precision | recall   | support |
|--------------|----------|-----------|----------|---------|
| AFIB         | 0.582930 | 0.579260  | 0.656631 | 204.0   |
| GSVT         | 0.710602 | 0.706947  | 0.714414 | 300.0   |
| SB           | 0.730835 | 0.727358  | 0.734354 | 892.0   |
| SR           | 0.573258 | 0.575146  | 0.571727 | 681.0   |
| macro avg    | 0.649406 | 0.647178  | 0.669282 | 2077.0  |
| micro avg    | 0.670518 | 0.670518  | 0.670518 | 2077.0  |
| weighted avg | 0.661720 | 0.659957  | 0.670518 | 2077.0  |

The result of Model Number:Dataset Number:Featuregroup Number:Rescale of 87 : 0 : 3 : 1

|      | f1-score | precision | recall   | support |
|------|----------|-----------|----------|---------|
| AFIB | 0.812077 | 0.803104  | 0.821269 | 875.0   |



GSVT 0.826708 0.831799 0.821694 691.0  
SB 0.879873 0.878408 0.881346 1553.0  
SR 0.858448 0.866475 0.850590 907.0  
macro avg 0.844277 0.844947 0.843725 4026.0  
micro avg 0.851122 0.851122 0.851122 4026.0  
weighted avg 0.851187 0.851354 0.851122 4026.0  
The result of Model Number:Dataset Number:Featuregroup Number:Rescale of 87 : 0 : 4 :  
0

f1-score precision recall support

AFIB 0.664383 0.659301 0.669631 875.0  
GSVT 0.679669 0.683386 0.676033 691.0  
SB 0.719715 0.719211 0.720225 1553.0  
SR 0.700598 0.703997 0.697269 907.0  
macro avg 0.691091 0.691474 0.690790 4026.0  
micro avg 0.696473 0.696473 0.696473 4026.0  
weighted avg 0.696509 0.696614 0.696473 4026.0  
The result of Model Number:Dataset Number:Featuregroup Number:Rescale of 87 : 0 : 4 :  
1

f1-score precision recall support

AFIB 0.660666 0.655612 0.665885 875.0  
GSVT 0.675867 0.679563 0.672251 691.0  
SB 0.715688 0.715187 0.716195 1553.0  
SR 0.696678 0.700058 0.693368 907.0  
macro avg 0.687225 0.687605 0.686925 4026.0  
micro avg 0.692576 0.692576 0.692576 4026.0  
weighted avg 0.692612 0.692716 0.692576 4026.0  
The result of Model Number:Dataset Number:Featuregroup Number:Rescale of 87 : 0 : 5 :  
0

f1-score precision recall support

AFIB 0.867675 0.857175 0.878475 875.0  
GSVT 0.879420 0.888437 0.870653 691.0  
SB 0.934034 0.930994 0.937100 1553.0  
SR 0.913604 0.922991 0.904437 907.0  
macro avg 0.898683 0.899899 0.897666 4026.0  
micro avg 0.905596 0.905596 0.905596 4026.0  
weighted avg 0.905636 0.905843 0.905596 4026.0  
The result of Model Number:Dataset Number:Featuregroup Number:Rescale of 87 : 0 : 5 :  
1

f1-score precision recall support

AFIB 0.775605 0.769435 0.781948 875.0  
GSVT 0.744852 0.730690 0.759636 691.0  
SB 0.781749 0.721623 0.852820 1553.0  
SR 0.598603 0.765401 0.491606 907.0  
macro avg 0.725202 0.746787 0.721502 4026.0

micro avg 0.740047 0.740047 0.740047 4026.0  
weighted avg 0.732821 0.743433 0.740047 4026.0  
The result of Model Number:Dataset Number:Featuregroup Number:Rescale of 87 : 0 : 6 :  
0

|              | f1-score | precision | recall   | support |
|--------------|----------|-----------|----------|---------|
| AFIB         | 0.768682 | 0.759447  | 0.778172 | 875.0   |
| GSVT         | 0.783466 | 0.789809  | 0.777229 | 691.0   |
| SB           | 0.835114 | 0.831918  | 0.838339 | 1553.0  |
| SR           | 0.815533 | 0.825961  | 0.805376 | 907.0   |
| macro avg    | 0.800699 | 0.801784  | 0.799779 | 4026.0  |
| micro avg    | 0.807348 | 0.807348  | 0.807348 | 4026.0  |
| weighted avg | 0.807400 | 0.807598  | 0.807348 | 4026.0  |

The result of Model Number:Dataset Number:Featuregroup Number:Rescale of 87 : 0 : 6 :  
1

|              | f1-score | precision | recall   | support |
|--------------|----------|-----------|----------|---------|
| AFIB         | 0.644637 | 0.636422  | 0.653089 | 875.0   |
| GSVT         | 0.615511 | 0.619747  | 0.611349 | 691.0   |
| SB           | 0.651716 | 0.614055  | 0.694312 | 1553.0  |
| SR           | 0.531497 | 0.614927  | 0.468031 | 907.0   |
| macro avg    | 0.610840 | 0.621288  | 0.606695 | 4026.0  |
| micro avg    | 0.620135 | 0.620135  | 0.620135 | 4026.0  |
| weighted avg | 0.616880 | 0.620090  | 0.620135 | 4026.0  |

The result of Model Number:Dataset Number:Featuregroup Number:Rescale of 87 : 0 : 7 :  
0

|              | f1-score | precision | recall   | support |
|--------------|----------|-----------|----------|---------|
| AFIB         | 0.794997 | 0.811014  | 0.780110 | 204.0   |
| GSVT         | 0.820506 | 0.813917  | 0.827362 | 300.0   |
| SB           | 0.838269 | 0.837425  | 0.839115 | 892.0   |
| SR           | 0.830628 | 0.830151  | 0.831115 | 681.0   |
| macro avg    | 0.821100 | 0.823127  | 0.819426 | 2077.0  |
| micro avg    | 0.828999 | 0.828999  | 0.828999 | 2077.0  |
| weighted avg | 0.828948 | 0.829051  | 0.828999 | 2077.0  |

The result of Model Number:Dataset Number:Featuregroup Number:Rescale of 87 : 0 : 7 :  
1

|              | f1-score | precision | recall   | support |
|--------------|----------|-----------|----------|---------|
| AFIB         | 0.714937 | 0.724486  | 0.705837 | 204.0   |
| GSVT         | 0.727567 | 0.723134  | 0.732165 | 300.0   |
| SB           | 0.745105 | 0.744444  | 0.745772 | 892.0   |
| SR           | 0.739599 | 0.739711  | 0.739492 | 681.0   |
| macro avg    | 0.731802 | 0.732944  | 0.730816 | 2077.0  |
| micro avg    | 0.737825 | 0.737825  | 0.737825 | 2077.0  |
| weighted avg | 0.737803 | 0.737854  | 0.737825 | 2077.0  |

The result of Model Number:Dataset Number:Featuregroup Number:Rescale of 87 : 0 : 8 :  
0

f1-score precision recall support  
AFIB 0.700037 0.758476 0.651354 204.0  
GSVT 0.750871 0.741429 0.760862 300.0  
SB 0.770039 0.759251 0.781228 892.0  
SR 0.749034 0.752543 0.745923 681.0  
macro avg 0.742495 0.752925 0.734842 2077.0  
micro avg 0.753955 0.753955 0.753955 2077.0  
weighted avg 0.753508 0.754401 0.753955 2077.0  
The result of Model Number:Dataset Number:Featuregroup Number:Rescale of 87 : 0 : 8 :  
1

f1-score precision recall support  
AFIB 0.784303 0.775153 0.795718 875.0  
GSVT 0.807001 0.797219 0.817675 691.0  
SB 0.819165 0.787544 0.865545 1553.0  
SR 0.650459 0.684770 0.619461 907.0  
macro avg 0.765232 0.761172 0.774600 4026.0  
micro avg 0.786714 0.786714 0.786714 4026.0  
weighted avg 0.771493 0.763358 0.786714 4026.0  
The result of Model Number:Dataset Number:Featuregroup Number:Rescale of 87 : 0 : 9 :  
0

f1-score precision recall support  
AFIB 0.775987 0.785515 0.766808 204.0  
GSVT 0.791617 0.788236 0.795046 300.0  
SB 0.801199 0.798794 0.803622 892.0  
SR 0.794456 0.796346 0.792599 681.0  
macro avg 0.790815 0.792223 0.789519 2077.0  
micro avg 0.795154 0.795154 0.795154 2077.0  
weighted avg 0.795128 0.795162 0.795154 2077.0  
The result of Model Number:Dataset Number:Featuregroup Number:Rescale of 87 : 0 : 9 :  
1

f1-score precision recall support  
AFIB 0.650337 0.653327 0.647407 875.0  
GSVT 0.623306 0.627061 0.619616 691.0  
SB 0.668597 0.638795 0.701350 1553.0  
SR 0.571797 0.622475 0.528864 907.0  
macro avg 0.628509 0.635414 0.624309 4026.0  
micro avg 0.636739 0.636739 0.636739 4026.0  
weighted avg 0.635047 0.636263 0.636739 4026.0  
The result of Model Number:Dataset Number:Featuregroup Number:Rescale of 87 : 0 :  
10 : 0

f1-score precision recall support  
AFIB 0.807637 0.795566 0.820111 875.0  
GSVT 0.823122 0.830162 0.816214 691.0  
SB 0.879487 0.876459 0.882542 1553.0

SR 0.853745 0.866479 0.841410 907.0  
macro avg 0.840998 0.842166 0.840069 4026.0  
micro avg 0.848323 0.848323 0.848323 4026.0  
weighted avg 0.848398 0.848683 0.848323 4026.0  
The result of Model Number:Dataset Number:Featuregroup Number:Rescale of 87 : 0 :  
10 : 1

f1-score precision recall support  
AFIB 0.740093 0.728485 0.752156 875.0  
GSVT 0.713128 0.733572 0.693875 691.0  
SB 0.749379 0.711392 0.791694 1553.0  
SR 0.608866 0.677544 0.552925 907.0  
macro avg 0.702866 0.712749 0.697663 4026.0  
micro avg 0.712521 0.712521 0.712521 4026.0  
weighted avg 0.709483 0.711289 0.712521 4026.0  
The result of Model Number:Dataset Number:Featuregroup Number:Rescale of 87 : 1 : 0 :  
0

f1-score precision recall support  
AFIB 0.766251 0.845012 0.701391 204.0  
GSVT 0.911817 0.899494 0.924572 300.0  
SB 0.971020 0.967137 0.974938 892.0  
SR 0.944665 0.931895 0.957830 681.0  
macro avg 0.898438 0.910885 0.889683 2077.0  
micro avg 0.935187 0.935187 0.935187 2077.0  
weighted avg 0.933715 0.933817 0.935187 2077.0  
The result of Model Number:Dataset Number:Featuregroup Number:Rescale of 87 : 1 : 0 :  
1

f1-score precision recall support  
AFIB 0.891630 0.909832 0.874537 204.0  
GSVT 0.924007 0.915979 0.932345 300.0  
SB 0.941772 0.940091 0.943461 892.0  
SR 0.933006 0.933562 0.932456 681.0  
macro avg 0.922604 0.924866 0.920700 2077.0  
micro avg 0.931478 0.931478 0.931478 2077.0  
weighted avg 0.931407 0.931495 0.931478 2077.0  
The result of Model Number:Dataset Number:Featuregroup Number:Rescale of 87 : 1 : 1 :  
0

f1-score precision recall support  
AFIB 0.880421 0.879005 0.882202 875.0  
GSVT 0.900949 0.896252 0.905747 691.0  
SB 0.941989 0.934008 0.950114 1553.0  
SR 0.906029 0.926172 0.887050 907.0  
macro avg 0.907347 0.908859 0.906278 4026.0  
micro avg 0.913532 0.913532 0.913532 4026.0  
weighted avg 0.913463 0.913808 0.913532 4026.0

The result of Model Number:Dataset Number:Featuregroup Number:Rescale of 87 : 1 : 1 : 1

|              | f1-score | precision | recall   | support |
|--------------|----------|-----------|----------|---------|
| AFIB         | 0.731145 | 0.729727  | 0.732663 | 875.0   |
| GSVT         | 0.744874 | 0.731841  | 0.758451 | 691.0   |
| SB           | 0.797971 | 0.786649  | 0.809632 | 1553.0  |
| SR           | 0.755889 | 0.789585  | 0.724983 | 907.0   |
| macro avg    | 0.757470 | 0.759451  | 0.756432 | 4026.0  |
| micro avg    | 0.765049 | 0.765049  | 0.765049 | 4026.0  |
| weighted avg | 0.764853 | 0.765532  | 0.765049 | 4026.0  |

The result of Model Number:Dataset Number:Featuregroup Number:Rescale of 87 : 1 : 2 : 0

|              | f1-score | precision | recall   | support |
|--------------|----------|-----------|----------|---------|
| AFIB         | 0.884938 | 0.886135  | 0.883913 | 875.0   |
| GSVT         | 0.898721 | 0.898259  | 0.899217 | 691.0   |
| SB           | 0.938621 | 0.935262  | 0.942007 | 1553.0  |
| SR           | 0.916144 | 0.921279  | 0.911125 | 907.0   |
| macro avg    | 0.909606 | 0.910234  | 0.909065 | 4026.0  |
| micro avg    | 0.915079 | 0.915079  | 0.915079 | 4026.0  |
| weighted avg | 0.915042 | 0.915084  | 0.915079 | 4026.0  |

The result of Model Number:Dataset Number:Featuregroup Number:Rescale of 87 : 1 : 2 : 1

|              | f1-score | precision | recall   | support |
|--------------|----------|-----------|----------|---------|
| AFIB         | 0.835259 | 0.836755  | 0.833795 | 875.0   |
| GSVT         | 0.799816 | 0.804018  | 0.795681 | 691.0   |
| SB           | 0.846012 | 0.799473  | 0.898311 | 1553.0  |
| SR           | 0.702616 | 0.790846  | 0.632159 | 907.0   |
| macro avg    | 0.795926 | 0.807773  | 0.789986 | 4026.0  |
| micro avg    | 0.806714 | 0.806714  | 0.806714 | 4026.0  |
| weighted avg | 0.803441 | 0.806412  | 0.806714 | 4026.0  |

The result of Model Number:Dataset Number:Featuregroup Number:Rescale of 87 : 1 : 3 : 0

|              | f1-score | precision | recall   | support |
|--------------|----------|-----------|----------|---------|
| AFIB         | 0.825951 | 0.863248  | 0.792013 | 204.0   |
| GSVT         | 0.854679 | 0.845080  | 0.864653 | 300.0   |
| SB           | 0.822169 | 0.786324  | 0.879733 | 892.0   |
| SR           | 0.684980 | 0.690820  | 0.679353 | 681.0   |
| macro avg    | 0.796945 | 0.796368  | 0.803938 | 2077.0  |
| micro avg    | 0.803239 | 0.803239  | 0.803239 | 2077.0  |
| weighted avg | 0.782255 | 0.771052  | 0.803239 | 2077.0  |

The result of Model Number:Dataset Number:Featuregroup Number:Rescale of 87 : 1 : 3 : 1

|      | f1-score | precision | recall   | support |
|------|----------|-----------|----------|---------|
| AFIB | 0.716614 | 0.708005  | 0.725462 | 875.0   |

GSVT 0.730397 0.736311 0.724582 691.0  
SB 0.778547 0.775567 0.781553 1553.0  
SR 0.760292 0.770014 0.750823 907.0  
macro avg 0.746463 0.747474 0.745605 4026.0  
micro avg 0.752661 0.752661 0.752661 4026.0  
weighted avg 0.752710 0.752894 0.752661 4026.0  
The result of Model Number:Dataset Number:Featuregroup Number:Rescale of 87 : 1 : 4 :  
0

f1-score precision recall support  
AFIB 0.562803 0.624596 0.512271 204.0  
GSVT 0.657148 0.648933 0.665703 300.0  
SB 0.699173 0.695606 0.702779 892.0  
SR 0.682795 0.673249 0.692618 681.0  
macro avg 0.650480 0.660596 0.643343 2077.0  
micro avg 0.675381 0.675381 0.675381 2077.0  
weighted avg 0.674339 0.674559 0.675381 2077.0  
The result of Model Number:Dataset Number:Featuregroup Number:Rescale of 87 : 1 : 4 :  
1

f1-score precision recall support  
AFIB 0.647708 0.656630 0.639310 875.0  
GSVT 0.661848 0.659107 0.664791 691.0  
SB 0.704971 0.695728 0.714493 1553.0  
SR 0.682838 0.693036 0.673240 907.0  
macro avg 0.674341 0.676125 0.672958 4026.0  
micro avg 0.680329 0.680329 0.680329 4026.0  
weighted avg 0.680138 0.680339 0.680329 4026.0  
The result of Model Number:Dataset Number:Featuregroup Number:Rescale of 87 : 1 : 5 :  
0

f1-score precision recall support  
AFIB 0.819283 0.806947 0.838823 875.0  
GSVT 0.782267 0.779990 0.788940 691.0  
SB 0.835361 0.778423 0.908232 1553.0  
SR 0.618804 0.827157 0.512753 907.0  
macro avg 0.763929 0.798129 0.762187 4026.0  
micro avg 0.783577 0.783577 0.783577 4026.0  
weighted avg 0.773967 0.795870 0.783577 4026.0  
The result of Model Number:Dataset Number:Featuregroup Number:Rescale of 87 : 1 : 5 :  
1

f1-score precision recall support  
AFIB 0.888066 0.894454 0.881770 875.0  
GSVT 0.886651 0.881342 0.892038 691.0  
SB 0.935287 0.924924 0.945887 1553.0  
SR 0.897480 0.913492 0.882049 907.0  
macro avg 0.901871 0.903553 0.900436 4026.0

micro avg 0.908328 0.908328 0.908328 4026.0  
weighted avg 0.908159 0.908246 0.908328 4026.0  
The result of Model Number:Dataset Number:Featuregroup Number:Rescale of 87 : 1 : 6 :  
0

f1-score precision recall support  
AFIB 0.740790 0.756176 0.726189 875.0  
GSVT 0.722418 0.697327 0.781388 691.0  
SB 0.851482 0.847643 0.855371 1553.0  
SR 0.647337 0.636886 0.658196 907.0  
macro avg 0.740507 0.734508 0.755286 4026.0  
micro avg 0.770176 0.770176 0.770176 4026.0  
weighted avg 0.759282 0.754484 0.770176 4026.0

The result of Model Number:Dataset Number:Featuregroup Number:Rescale of 87 : 1 : 6 :  
1

f1-score precision recall support  
AFIB 0.654255 0.657687 0.650897 875.0  
GSVT 0.667935 0.666735 0.669187 691.0  
SB 0.725263 0.719701 0.730913 1553.0  
SR 0.699675 0.706678 0.692814 907.0  
macro avg 0.686782 0.687700 0.685953 4026.0  
micro avg 0.694345 0.694345 0.694345 4026.0  
weighted avg 0.694226 0.694198 0.694345 4026.0

The result of Model Number:Dataset Number:Featuregroup Number:Rescale of 87 : 1 : 7 :  
0

f1-score precision recall support  
AFIB 0.787779 0.790088 0.785543 875.0  
GSVT 0.800814 0.790528 0.811474 691.0  
SB 0.847529 0.845469 0.849602 1553.0  
SR 0.826068 0.835871 0.816500 907.0  
macro avg 0.815547 0.815489 0.815780 4026.0  
micro avg 0.821678 0.821678 0.821678 4026.0  
weighted avg 0.821690 0.821841 0.821678 4026.0

The result of Model Number:Dataset Number:Featuregroup Number:Rescale of 87 : 1 : 7 :  
1

f1-score precision recall support  
AFIB 0.824300 0.816359 0.832525 875.0  
GSVT 0.845897 0.848317 0.843579 691.0  
SB 0.899334 0.897266 0.901418 1553.0  
SR 0.874036 0.884320 0.864007 907.0  
macro avg 0.860892 0.861566 0.860382 4026.0  
micro avg 0.868090 0.868090 0.868090 4026.0  
weighted avg 0.868155 0.868364 0.868090 4026.0

The result of Model Number:Dataset Number:Featuregroup Number:Rescale of 87 : 1 : 8 :  
0

f1-score precision recall support  
AFIB 0.809178 0.824195 0.794899 204.0  
GSVT 0.826970 0.822634 0.831369 300.0  
SB 0.840173 0.837186 0.843186 892.0  
SR 0.831523 0.833022 0.830066 681.0  
macro avg 0.826961 0.829259 0.824880 2077.0  
micro avg 0.832435 0.832435 0.832435 2077.0  
weighted avg 0.832386 0.832443 0.832435 2077.0  
The result of Model Number:Dataset Number:Featuregroup Number:Rescale of 87 : 1 : 8 :  
1

f1-score precision recall support  
AFIB 0.794213 0.798149 0.790401 875.0  
GSVT 0.802121 0.803276 0.801090 691.0  
SB 0.844340 0.840423 0.848304 1553.0  
SR 0.828797 0.830873 0.826778 907.0  
macro avg 0.817368 0.818180 0.816643 4026.0  
micro avg 0.822766 0.822766 0.822766 4026.0  
weighted avg 0.822698 0.822708 0.822766 4026.0  
The result of Model Number:Dataset Number:Featuregroup Number:Rescale of 87 : 1 : 9 :  
0

f1-score precision recall support  
AFIB 0.646922 0.642045 0.734248 204.0  
GSVT 0.784265 0.779622 0.788972 300.0  
SB 0.641420 0.640081 0.642767 892.0  
SR 0.793286 0.792016 0.794569 681.0  
macro avg 0.716473 0.713441 0.740139 2077.0  
micro avg 0.722643 0.722643 0.722643 2077.0  
weighted avg 0.712386 0.710245 0.722643 2077.0  
The result of Model Number:Dataset Number:Featuregroup Number:Rescale of 87 : 1 : 9 :  
1

f1-score precision recall support  
AFIB 0.780583 0.779320 0.781919 875.0  
GSVT 0.787735 0.790868 0.784667 691.0  
SB 0.827259 0.824252 0.830294 1553.0  
SR 0.813728 0.817844 0.809698 907.0  
macro avg 0.802326 0.803071 0.801644 4026.0  
micro avg 0.807309 0.807309 0.807309 4026.0  
weighted avg 0.807282 0.807313 0.807309 4026.0  
The result of Model Number:Dataset Number:Featuregroup Number:Rescale of 87 : 1 :  
10 : 0

f1-score precision recall support  
AFIB 0.664446 0.668923 0.660128 875.0  
GSVT 0.676304 0.666911 0.686091 691.0  
SB 0.720676 0.715741 0.725686 1553.0



SR 0.691471 0.703415 0.679963 907.0  
macro avg 0.688224 0.688747 0.687967 4026.0  
micro avg 0.694341 0.694341 0.694341 4026.0  
weighted avg 0.694260 0.694408 0.694341 4026.0  
The result of Model Number:Dataset Number:Featuregroup Number:Rescale of 87 : 1 :  
10 : 1

f1-score precision recall support  
AFIB 0.676350 0.694057 0.659833 204.0  
GSVT 0.636399 0.654895 0.619265 300.0  
SB 0.671537 0.647893 0.696983 892.0  
SR 0.608666 0.628488 0.590178 681.0  
macro avg 0.648238 0.656333 0.641565 2077.0  
micro avg 0.647090 0.647090 0.647090 2077.0  
weighted avg 0.646320 0.647076 0.647090 2077.0

The result of Model Number:Dataset Number:Featuregroup Number:Rescale of 88 : 0 : 0 :  
0

f1-score precision recall support  
AFIB 0.897958 0.937867 0.861432 204.0  
GSVT 0.935378 0.928035 0.942859 300.0  
SB 0.949666 0.942340 0.957116 892.0  
SR 0.939160 0.940711 0.937647 681.0  
macro avg 0.930541 0.937238 0.924763 2077.0  
micro avg 0.939275 0.939275 0.939275 2077.0  
weighted avg 0.939079 0.939301 0.939275 2077.0

The result of Model Number:Dataset Number:Featuregroup Number:Rescale of 88 : 0 : 0 :  
1

f1-score precision recall support  
AFIB 0.866773 0.881822 0.852339 204.0  
GSVT 0.883853 0.881238 0.886503 300.0  
SB 0.894276 0.891094 0.897483 892.0  
SR 0.887005 0.887931 0.886101 681.0  
macro avg 0.882977 0.885521 0.880606 2077.0  
micro avg 0.887731 0.887731 0.887731 2077.0  
weighted avg 0.887685 0.887723 0.887731 2077.0

The result of Model Number:Dataset Number:Featuregroup Number:Rescale of 88 : 0 : 1 :  
0

f1-score precision recall support  
AFIB 0.795113 0.789739 0.800668 875.0  
GSVT 0.814511 0.814835 0.814292 691.0  
SB 0.865252 0.863044 0.867481 1553.0  
SR 0.841692 0.851096 0.832505 907.0  
macro avg 0.829142 0.829679 0.828736 4026.0  
micro avg 0.835951 0.835951 0.835951 4026.0  
weighted avg 0.835992 0.836146 0.835951 4026.0

The result of Model Number:Dataset Number:Featuregroup Number:Rescale of 88 : 0 : 1 : 1

|              | f1-score | precision | recall   | support |
|--------------|----------|-----------|----------|---------|
| AFIB         | 0.633259 | 0.619727  | 0.647432 | 875.0   |
| GSVT         | 0.655780 | 0.665808  | 0.646108 | 691.0   |
| SB           | 0.699060 | 0.699152  | 0.698970 | 1553.0  |
| SR           | 0.681050 | 0.688103  | 0.674143 | 907.0   |
| macro avg    | 0.667287 | 0.668197  | 0.666663 | 4026.0  |
| micro avg    | 0.673103 | 0.673103  | 0.673103 | 4026.0  |
| weighted avg | 0.673273 | 0.673678  | 0.673103 | 4026.0  |

The result of Model Number:Dataset Number:Featuregroup Number:Rescale of 88 : 0 : 2 : 0

|              | f1-score | precision | recall   | support |
|--------------|----------|-----------|----------|---------|
| AFIB         | 0.708194 | 0.687027  | 0.755119 | 875.0   |
| GSVT         | 0.606463 | 0.593182  | 0.620577 | 691.0   |
| SB           | 0.804401 | 0.797847  | 0.811277 | 1553.0  |
| SR           | 0.754644 | 0.786327  | 0.726831 | 907.0   |
| macro avg    | 0.718425 | 0.716096  | 0.728451 | 4026.0  |
| micro avg    | 0.747317 | 0.747317  | 0.747317 | 4026.0  |
| weighted avg | 0.738309 | 0.736039  | 0.747317 | 4026.0  |

The result of Model Number:Dataset Number:Featuregroup Number:Rescale of 88 : 0 : 2 : 1

|              | f1-score | precision | recall   | support |
|--------------|----------|-----------|----------|---------|
| AFIB         | 0.839665 | 0.830387  | 0.849169 | 875.0   |
| GSVT         | 0.854793 | 0.860057  | 0.849609 | 691.0   |
| SB           | 0.909764 | 0.908250  | 0.911287 | 1553.0  |
| SR           | 0.887611 | 0.895911  | 0.879487 | 907.0   |
| macro avg    | 0.872958 | 0.873651  | 0.872388 | 4026.0  |
| micro avg    | 0.880036 | 0.880036  | 0.880036 | 4026.0  |
| weighted avg | 0.880103 | 0.880276  | 0.880036 | 4026.0  |

The result of Model Number:Dataset Number:Featuregroup Number:Rescale of 88 : 0 : 3 : 0

|              | f1-score | precision | recall   | support |
|--------------|----------|-----------|----------|---------|
| AFIB         | 0.855886 | 0.837597  | 0.875042 | 875.0   |
| GSVT         | 0.886325 | 0.899878  | 0.873253 | 691.0   |
| SB           | 0.944820 | 0.944945  | 0.944699 | 1553.0  |
| SR           | 0.920480 | 0.930012  | 0.911144 | 907.0   |
| macro avg    | 0.901878 | 0.903108  | 0.901035 | 4026.0  |
| micro avg    | 0.909738 | 0.909738  | 0.909738 | 4026.0  |
| weighted avg | 0.909968 | 0.910515  | 0.909738 | 4026.0  |

The result of Model Number:Dataset Number:Featuregroup Number:Rescale of 88 : 0 : 3 : 1

|      | f1-score | precision | recall   | support |
|------|----------|-----------|----------|---------|
| AFIB | 0.883646 | 0.883205  | 0.884127 | 875.0   |

GSVT 0.894638 0.900624 0.888803 691.0  
SB 0.948439 0.946260 0.950634 1553.0  
SR 0.920969 0.920750 0.921346 907.0  
macro avg 0.911923 0.912710 0.911227 4026.0  
micro avg 0.918969 0.918969 0.918969 4026.0  
weighted avg 0.918934 0.918976 0.918969 4026.0  
The result of Model Number:Dataset Number:Featuregroup Number:Rescale of 88 : 0 : 4 :  
0

f1-score precision recall support  
AFIB 0.771900 0.795761 0.750102 204.0  
GSVT 0.720559 0.736224 0.706079 300.0  
SB 0.760008 0.726277 0.797062 892.0  
SR 0.684304 0.719467 0.652514 681.0  
macro avg 0.734193 0.744432 0.726439 2077.0  
micro avg 0.731914 0.731914 0.731914 2077.0  
weighted avg 0.730656 0.732306 0.731914 2077.0  
The result of Model Number:Dataset Number:Featuregroup Number:Rescale of 88 : 0 : 4 :  
1

f1-score precision recall support  
AFIB 0.830030 0.819355 0.841046 875.0  
GSVT 0.846927 0.853938 0.840064 691.0  
SB 0.905535 0.901504 0.909612 1553.0  
SR 0.879765 0.892777 0.867149 907.0  
macro avg 0.865564 0.866894 0.864468 4026.0  
micro avg 0.873207 0.873207 0.873207 4026.0  
weighted avg 0.873260 0.873520 0.873207 4026.0  
The result of Model Number:Dataset Number:Featuregroup Number:Rescale of 88 : 0 : 5 :  
0

f1-score precision recall support  
AFIB 0.859099 0.917758 0.807855 204.0  
GSVT 0.908154 0.889647 0.927525 300.0  
SB 0.930679 0.922520 0.939018 892.0  
SR 0.907722 0.910745 0.904800 681.0  
macro avg 0.901414 0.910168 0.894800 2077.0  
micro avg 0.913256 0.913256 0.913256 2077.0  
weighted avg 0.912868 0.913443 0.913256 2077.0  
The result of Model Number:Dataset Number:Featuregroup Number:Rescale of 88 : 0 : 5 :  
1

f1-score precision recall support  
AFIB 0.757825 0.774472 0.742163 204.0  
GSVT 0.782248 0.775926 0.788782 300.0  
SB 0.798643 0.797660 0.799628 892.0  
SR 0.791900 0.791212 0.792595 681.0  
macro avg 0.782654 0.784817 0.780792 2077.0

micro avg 0.790111 0.790111 0.790111 2077.0  
weighted avg 0.790055 0.790129 0.790111 2077.0  
The result of Model Number:Dataset Number:Featuregroup Number:Rescale of 88 : 0 : 6 :  
0

|              | f1-score | precision | recall   | support |
|--------------|----------|-----------|----------|---------|
| AFIB         | 0.714157 | 0.715437  | 0.712905 | 875.0   |
| GSVT         | 0.683854 | 0.687446  | 0.680318 | 691.0   |
| SB           | 0.723351 | 0.683560  | 0.768068 | 1553.0  |
| SR           | 0.600746 | 0.676184  | 0.540504 | 907.0   |
| macro avg    | 0.680527 | 0.690657  | 0.675449 | 4026.0  |
| micro avg    | 0.689751 | 0.689751  | 0.689751 | 4026.0  |
| weighted avg | 0.686953 | 0.689493  | 0.689751 | 4026.0  |

The result of Model Number:Dataset Number:Featuregroup Number:Rescale of 88 : 0 : 6 :  
1

|              | f1-score | precision | recall   | support |
|--------------|----------|-----------|----------|---------|
| AFIB         | 0.858046 | 0.848035  | 0.870533 | 875.0   |
| GSVT         | 0.882877 | 0.872175  | 0.894555 | 691.0   |
| SB           | 0.896185 | 0.861591  | 0.946926 | 1553.0  |
| SR           | 0.711617 | 0.749154  | 0.677705 | 907.0   |
| macro avg    | 0.837181 | 0.832739  | 0.847430 | 4026.0  |
| micro avg    | 0.860683 | 0.860683  | 0.860683 | 4026.0  |
| weighted avg | 0.844031 | 0.835131  | 0.860683 | 4026.0  |

The result of Model Number:Dataset Number:Featuregroup Number:Rescale of 88 : 0 : 7 :  
0

|              | f1-score | precision | recall   | support |
|--------------|----------|-----------|----------|---------|
| AFIB         | 0.881023 | 0.879218  | 0.883474 | 875.0   |
| GSVT         | 0.893041 | 0.883667  | 0.902777 | 691.0   |
| SB           | 0.941858 | 0.929141  | 0.955113 | 1553.0  |
| SR           | 0.896028 | 0.930198  | 0.864483 | 907.0   |
| macro avg    | 0.902987 | 0.905556  | 0.901462 | 4026.0  |
| micro avg    | 0.910143 | 0.910143  | 0.910143 | 4026.0  |
| weighted avg | 0.909933 | 0.910724  | 0.910143 | 4026.0  |

The result of Model Number:Dataset Number:Featuregroup Number:Rescale of 88 : 0 : 7 :  
1

|              | f1-score | precision | recall   | support |
|--------------|----------|-----------|----------|---------|
| AFIB         | 0.883514 | 0.883672  | 0.883395 | 875.0   |
| GSVT         | 0.892862 | 0.895878  | 0.889922 | 691.0   |
| SB           | 0.937905 | 0.934671  | 0.941166 | 1553.0  |
| SR           | 0.920095 | 0.923198  | 0.917046 | 907.0   |
| macro avg    | 0.908594 | 0.909355  | 0.907882 | 4026.0  |
| micro avg    | 0.914381 | 0.914381  | 0.914381 | 4026.0  |
| weighted avg | 0.914341 | 0.914344  | 0.914381 | 4026.0  |

The result of Model Number:Dataset Number:Featuregroup Number:Rescale of 88 : 0 : 8 :  
0

f1-score precision recall support  
AFIB 0.750929 0.749714 0.752215 875.0  
GSVT 0.757810 0.760824 0.754859 691.0  
SB 0.795833 0.792940 0.798752 1553.0  
SR 0.782815 0.786775 0.778938 907.0  
macro avg 0.771847 0.772563 0.771191 4026.0  
micro avg 0.776641 0.776641 0.776641 4026.0  
weighted avg 0.776615 0.776644 0.776641 4026.0  
The result of Model Number:Dataset Number:Featuregroup Number:Rescale of 88 : 0 : 8 :  
1

f1-score precision recall support  
AFIB 0.845594 0.871638 0.821231 204.0  
GSVT 0.867166 0.856551 0.878143 300.0  
SB 0.890720 0.885428 0.896106 892.0  
SR 0.875706 0.880025 0.871463 681.0  
macro avg 0.869797 0.873411 0.866736 2077.0  
micro avg 0.878078 0.878078 0.878078 2077.0  
weighted avg 0.877963 0.878131 0.878078 2077.0  
The result of Model Number:Dataset Number:Featuregroup Number:Rescale of 88 : 0 : 9 :  
0

f1-score precision recall support  
AFIB 0.812804 0.820214 0.805633 204.0  
GSVT 0.834015 0.831284 0.836790 300.0  
SB 0.849262 0.848695 0.849832 892.0  
SR 0.841792 0.841551 0.842047 681.0  
macro avg 0.834468 0.835436 0.833575 2077.0  
micro avg 0.841054 0.841054 0.841054 2077.0  
weighted avg 0.841030 0.841041 0.841054 2077.0  
The result of Model Number:Dataset Number:Featuregroup Number:Rescale of 88 : 0 : 9 :  
1

f1-score precision recall support  
AFIB 0.682840 0.681516 0.684257 875.0  
GSVT 0.695662 0.683490 0.708342 691.0  
SB 0.745250 0.734677 0.756141 1553.0  
SR 0.705949 0.737419 0.677085 907.0  
macro avg 0.707425 0.709275 0.706456 4026.0  
micro avg 0.714504 0.714504 0.714504 4026.0  
weighted avg 0.714321 0.714955 0.714504 4026.0  
The result of Model Number:Dataset Number:Featuregroup Number:Rescale of 88 : 0 :  
10 : 0

f1-score precision recall support  
AFIB 0.778948 0.778016 0.780014 875.0  
GSVT 0.794132 0.796864 0.791501 691.0  
SB 0.841104 0.835923 0.846357 1553.0

SR 0.823988 0.832035 0.816185 907.0  
macro avg 0.809543 0.810709 0.808514 4026.0  
micro avg 0.815726 0.815726 0.815726 4026.0  
weighted avg 0.815677 0.815758 0.815726 4026.0  
The result of Model Number:Dataset Number:Featuregroup Number:Rescale of 88 : 0 :  
10 : 1

f1-score precision recall support  
AFIB 0.797148 0.829323 0.767440 204.0  
GSVT 0.826812 0.813381 0.840837 300.0  
SB 0.848202 0.841383 0.855143 892.0  
SR 0.825382 0.831326 0.819567 681.0  
macro avg 0.824386 0.828853 0.820747 2077.0  
micro avg 0.832798 0.832798 0.832798 2077.0  
weighted avg 0.832616 0.832856 0.832798 2077.0

The result of Model Number:Dataset Number:Featuregroup Number:Rescale of 88 : 1 : 0 :  
0

f1-score precision recall support  
AFIB 0.689261 0.723699 0.658298 204.0  
GSVT 0.710041 0.696882 0.723953 300.0  
SB 0.726290 0.718969 0.733777 892.0  
SR 0.706147 0.712455 0.700015 681.0  
macro avg 0.707935 0.713001 0.704011 2077.0  
micro avg 0.713875 0.713875 0.713875 2077.0  
weighted avg 0.713702 0.714108 0.713875 2077.0

The result of Model Number:Dataset Number:Featuregroup Number:Rescale of 88 : 1 : 0 :  
1

f1-score precision recall support  
AFIB 0.893936 0.895145 0.892901 875.0  
GSVT 0.907860 0.907393 0.908361 691.0  
SB 0.948165 0.944773 0.951586 1553.0  
SR 0.925460 0.930647 0.920390 907.0  
macro avg 0.918855 0.919490 0.918309 4026.0  
micro avg 0.924384 0.924384 0.924384 4026.0  
weighted avg 0.924346 0.924389 0.924384 4026.0

The result of Model Number:Dataset Number:Featuregroup Number:Rescale of 88 : 1 : 1 :  
0

f1-score precision recall support  
AFIB 0.842972 0.928588 0.772620 204.0  
GSVT 0.778480 0.832312 0.731552 300.0  
SB 0.847534 0.791913 0.911571 892.0  
SR 0.733554 0.772114 0.698864 681.0  
macro avg 0.800635 0.831232 0.778652 2077.0  
micro avg 0.802180 0.802180 0.802180 2077.0  
weighted avg 0.799741 0.804681 0.802180 2077.0

The result of Model Number:Dataset Number:Featuregroup Number:Rescale of 88 : 1 : 1 : 1

|              | f1-score | precision | recall   | support |
|--------------|----------|-----------|----------|---------|
| AFIB         | 0.827632 | 0.844992  | 0.810993 | 204.0   |
| GSVT         | 0.846831 | 0.841821  | 0.851910 | 300.0   |
| SB           | 0.867476 | 0.865445  | 0.869518 | 892.0   |
| SR           | 0.860149 | 0.859902  | 0.860404 | 681.0   |
| macro avg    | 0.850522 | 0.853040  | 0.848206 | 2077.0  |
| micro avg    | 0.858238 | 0.858238  | 0.858238 | 2077.0  |
| weighted avg | 0.858178 | 0.858206  | 0.858238 | 2077.0  |

The result of Model Number:Dataset Number:Featuregroup Number:Rescale of 88 : 1 : 2 : 0

|              | f1-score | precision | recall   | support |
|--------------|----------|-----------|----------|---------|
| AFIB         | 0.694896 | 0.690520  | 0.782752 | 204.0   |
| GSVT         | 0.847090 | 0.842733  | 0.851635 | 300.0   |
| SB           | 0.871209 | 0.867064  | 0.875404 | 892.0   |
| SR           | 0.683365 | 0.685617  | 0.681541 | 681.0   |
| macro avg    | 0.774140 | 0.771483  | 0.797833 | 2077.0  |
| micro avg    | 0.799307 | 0.799307  | 0.799307 | 2077.0  |
| weighted avg | 0.788818 | 0.786717  | 0.799307 | 2077.0  |

The result of Model Number:Dataset Number:Featuregroup Number:Rescale of 88 : 1 : 2 : 1

|              | f1-score | precision | recall   | support |
|--------------|----------|-----------|----------|---------|
| AFIB         | 0.694412 | 0.685774  | 0.703348 | 875.0   |
| GSVT         | 0.716153 | 0.725121  | 0.707475 | 691.0   |
| SB           | 0.764035 | 0.763207  | 0.764870 | 1553.0  |
| SR           | 0.743428 | 0.747240  | 0.739658 | 907.0   |
| macro avg    | 0.729507 | 0.730336  | 0.728838 | 4026.0  |
| micro avg    | 0.735968 | 0.735968  | 0.735968 | 4026.0  |
| weighted avg | 0.736043 | 0.736244  | 0.735968 | 4026.0  |

The result of Model Number:Dataset Number:Featuregroup Number:Rescale of 88 : 1 : 3 : 0

|              | f1-score | precision | recall   | support |
|--------------|----------|-----------|----------|---------|
| AFIB         | 0.906172 | 0.911128  | 0.901301 | 875.0   |
| GSVT         | 0.901854 | 0.894249  | 0.909679 | 691.0   |
| SB           | 0.948525 | 0.939542  | 0.957685 | 1553.0  |
| SR           | 0.913223 | 0.930258  | 0.896814 | 907.0   |
| macro avg    | 0.917443 | 0.918794  | 0.916369 | 4026.0  |
| micro avg    | 0.923477 | 0.923477  | 0.923477 | 4026.0  |
| weighted avg | 0.923357 | 0.923501  | 0.923477 | 4026.0  |

The result of Model Number:Dataset Number:Featuregroup Number:Rescale of 88 : 1 : 3 : 1

|      | f1-score | precision | recall   | support |
|------|----------|-----------|----------|---------|
| AFIB | 0.838496 | 0.903849  | 0.782346 | 204.0   |

GSVT 0.864066 0.878693 0.849955 300.0  
SB 0.915748 0.907320 0.924362 892.0  
SR 0.879300 0.866549 0.892472 681.0  
macro avg 0.874403 0.889103 0.862284 2077.0  
micro avg 0.889210 0.889210 0.889210 2077.0  
weighted avg 0.888745 0.889476 0.889210 2077.0  
The result of Model Number:Dataset Number:Featuregroup Number:Rescale of 88 : 1 : 4 :  
0

f1-score precision recall support  
AFIB 0.870647 0.877158 0.864266 204.0  
GSVT 0.892894 0.888182 0.897657 300.0  
SB 0.907963 0.906748 0.909183 892.0  
SR 0.899966 0.901691 0.898249 681.0  
macro avg 0.892867 0.893445 0.892339 2077.0  
micro avg 0.899522 0.899522 0.899522 2077.0  
weighted avg 0.899499 0.899502 0.899522 2077.0  
The result of Model Number:Dataset Number:Featuregroup Number:Rescale of 88 : 1 : 4 :  
1

f1-score precision recall support  
AFIB 0.907280 0.931802 0.884204 204.0  
GSVT 0.914758 0.901292 0.928758 300.0  
SB 0.932478 0.922558 0.942616 892.0  
SR 0.915183 0.927758 0.902959 681.0  
macro avg 0.917425 0.920852 0.914634 2077.0  
micro avg 0.921875 0.921875 0.921875 2077.0  
weighted avg 0.921773 0.922099 0.921875 2077.0  
The result of Model Number:Dataset Number:Featuregroup Number:Rescale of 88 : 1 : 5 :  
0

f1-score precision recall support  
AFIB 0.865990 0.888873 0.844340 204.0  
GSVT 0.889739 0.882348 0.897418 300.0  
SB 0.914256 0.910901 0.917638 892.0  
SR 0.900100 0.901191 0.899036 681.0  
macro avg 0.892521 0.895828 0.889608 2077.0  
micro avg 0.901419 0.901419 0.901419 2077.0  
weighted avg 0.901333 0.901430 0.901419 2077.0  
The result of Model Number:Dataset Number:Featuregroup Number:Rescale of 88 : 1 : 5 :  
1

f1-score precision recall support  
AFIB 0.688457 0.695796 0.681385 204.0  
GSVT 0.701118 0.697272 0.705085 300.0  
SB 0.717302 0.716107 0.718507 892.0  
SR 0.711323 0.712482 0.710177 681.0  
macro avg 0.704550 0.705414 0.703788 2077.0



micro avg 0.710191 0.710191 0.710191 2077.0  
weighted avg 0.710171 0.710203 0.710191 2077.0  
The result of Model Number:Dataset Number:Featuregroup Number:Rescale of 88 : 1 : 6 :  
0

|              | f1-score | precision | recall   | support |
|--------------|----------|-----------|----------|---------|
| AFIB         | 0.804261 | 0.819672  | 0.789624 | 204.0   |
| GSVT         | 0.829837 | 0.825562  | 0.834233 | 300.0   |
| SB           | 0.850359 | 0.849035  | 0.851694 | 892.0   |
| SR           | 0.841980 | 0.841143  | 0.842845 | 681.0   |
| macro avg    | 0.831609 | 0.833853  | 0.829599 | 2077.0  |
| micro avg    | 0.840174 | 0.840174  | 0.840174 | 2077.0  |
| weighted avg | 0.840120 | 0.840173  | 0.840174 | 2077.0  |

The result of Model Number:Dataset Number:Featuregroup Number:Rescale of 88 : 1 : 6 :  
1

|              | f1-score | precision | recall   | support |
|--------------|----------|-----------|----------|---------|
| AFIB         | 0.726938 | 0.724103  | 0.729847 | 875.0   |
| GSVT         | 0.740543 | 0.742104  | 0.739031 | 691.0   |
| SB           | 0.786111 | 0.784151  | 0.788085 | 1553.0  |
| SR           | 0.767977 | 0.773135  | 0.762903 | 907.0   |
| macro avg    | 0.755392 | 0.755873  | 0.754967 | 4026.0  |
| micro avg    | 0.761335 | 0.761335  | 0.761335 | 4026.0  |
| weighted avg | 0.761344 | 0.761402  | 0.761335 | 4026.0  |

The result of Model Number:Dataset Number:Featuregroup Number:Rescale of 88 : 1 : 7 :  
0

|              | f1-score | precision | recall   | support |
|--------------|----------|-----------|----------|---------|
| AFIB         | 0.761276 | 0.780261  | 0.743249 | 875.0   |
| GSVT         | 0.809864 | 0.812969  | 0.806821 | 691.0   |
| SB           | 0.877015 | 0.872768  | 0.881305 | 1553.0  |
| SR           | 0.831020 | 0.817169  | 0.845403 | 907.0   |
| macro avg    | 0.819794 | 0.820792  | 0.819194 | 4026.0  |
| micro avg    | 0.830428 | 0.830428  | 0.830428 | 4026.0  |
| weighted avg | 0.829973 | 0.829874  | 0.830428 | 4026.0  |

The result of Model Number:Dataset Number:Featuregroup Number:Rescale of 88 : 1 : 7 :  
1

|              | f1-score | precision | recall   | support |
|--------------|----------|-----------|----------|---------|
| AFIB         | 0.694610 | 0.711908  | 0.678168 | 875.0   |
| GSVT         | 0.733906 | 0.737022  | 0.730847 | 691.0   |
| SB           | 0.796054 | 0.793008  | 0.799128 | 1553.0  |
| SR           | 0.757222 | 0.743112  | 0.771919 | 907.0   |
| macro avg    | 0.745448 | 0.746262  | 0.745015 | 4026.0  |
| micro avg    | 0.754990 | 0.754990  | 0.754990 | 4026.0  |
| weighted avg | 0.754592 | 0.754532  | 0.754990 | 4026.0  |

The result of Model Number:Dataset Number:Featuregroup Number:Rescale of 88 : 1 : 8 :  
0

f1-score precision recall support  
AFIB 0.785149 0.784210 0.786223 875.0  
GSVT 0.800454 0.803208 0.797802 691.0  
SB 0.847800 0.842577 0.853095 1553.0  
SR 0.830547 0.838659 0.822683 907.0  
macro avg 0.815988 0.817163 0.814951 4026.0  
micro avg 0.822220 0.822220 0.822220 4026.0  
weighted avg 0.822171 0.822252 0.822220 4026.0  
The result of Model Number:Dataset Number:Featuregroup Number:Rescale of 88 : 1 : 8 :  
1

f1-score precision recall support  
AFIB 0.746231 0.778550 0.716700 204.0  
GSVT 0.697596 0.704106 0.691555 300.0  
SB 0.723109 0.687558 0.762589 892.0  
SR 0.644486 0.685158 0.608580 681.0  
macro avg 0.702855 0.713843 0.694856 2077.0  
micro avg 0.697326 0.697326 0.697326 2077.0  
weighted avg 0.695916 0.698098 0.697326 2077.0  
The result of Model Number:Dataset Number:Featuregroup Number:Rescale of 88 : 1 : 9 :  
0

f1-score precision recall support  
AFIB 0.671086 0.671183 0.671078 875.0  
GSVT 0.682807 0.677147 0.688613 691.0  
SB 0.714890 0.708705 0.721194 1553.0  
SR 0.691332 0.706950 0.676414 907.0  
macro avg 0.690029 0.690996 0.689325 4026.0  
micro avg 0.694622 0.694622 0.694622 4026.0  
weighted avg 0.694556 0.694738 0.694622 4026.0  
The result of Model Number:Dataset Number:Featuregroup Number:Rescale of 88 : 1 : 9 :  
1

f1-score precision recall support  
AFIB 0.889338 0.909149 0.870627 204.0  
GSVT 0.900310 0.887124 0.914269 300.0  
SB 0.920655 0.911505 0.930030 892.0  
SR 0.903672 0.916651 0.891082 681.0  
macro avg 0.903494 0.906108 0.901502 2077.0  
micro avg 0.909149 0.909149 0.909149 2077.0  
weighted avg 0.909072 0.909440 0.909149 2077.0  
The result of Model Number:Dataset Number:Featuregroup Number:Rescale of 88 : 1 :  
10 : 0

f1-score precision recall support  
AFIB 0.821608 0.823493 0.819820 875.0  
GSVT 0.824472 0.822147 0.826837 691.0  
SB 0.865270 0.858105 0.872568 1553.0

SR 0.839312 0.851908 0.827119 907.0  
macro avg 0.837666 0.838913 0.836586 4026.0  
micro avg 0.843016 0.843016 0.843016 4026.0  
weighted avg 0.842930 0.843015 0.843016 4026.0  
The result of Model Number:Dataset Number:Featuregroup Number:Rescale of 88 : 1 :  
10 : 1

f1-score precision recall support  
AFIB 0.738942 0.741706 0.736513 875.0  
GSVT 0.755575 0.762864 0.748575 691.0  
SB 0.803413 0.794986 0.812082 1553.0  
SR 0.775591 0.782417 0.769150 907.0  
macro avg 0.768380 0.770493 0.766580 4026.0  
micro avg 0.775086 0.775086 0.775086 4026.0  
weighted avg 0.774922 0.775062 0.775086 4026.0

The result of Model Number:Dataset Number:Featuregroup Number:Rescale of 89 : 0 : 0 :  
0

f1-score precision recall support  
AFIB 0.841897 0.867827 0.817640 204.0  
GSVT 0.863375 0.852806 0.874304 300.0  
SB 0.886826 0.881556 0.892188 892.0  
SR 0.871877 0.876178 0.867653 681.0  
macro avg 0.865994 0.869592 0.862946 2077.0  
micro avg 0.874238 0.874238 0.874238 2077.0  
weighted avg 0.874125 0.874292 0.874238 2077.0

The result of Model Number:Dataset Number:Featuregroup Number:Rescale of 89 : 0 : 0 :  
1

f1-score precision recall support  
AFIB 0.687800 0.695667 0.680375 204.0  
GSVT 0.703899 0.699734 0.708126 300.0  
SB 0.675730 0.650770 0.717863 892.0  
SR 0.566831 0.569574 0.564129 681.0  
macro avg 0.658565 0.653936 0.667623 2077.0  
micro avg 0.662369 0.662369 0.662369 2077.0  
weighted avg 0.645279 0.635630 0.662369 2077.0

The result of Model Number:Dataset Number:Featuregroup Number:Rescale of 89 : 0 : 1 :  
0

f1-score precision recall support  
AFIB 0.868529 0.907748 0.832842 204.0  
GSVT 0.898737 0.888644 0.909227 300.0  
SB 0.864552 0.826859 0.925083 892.0  
SR 0.720290 0.726432 0.714374 681.0  
macro avg 0.838027 0.837421 0.845381 2077.0  
micro avg 0.844646 0.844646 0.844646 2077.0  
weighted avg 0.822580 0.810800 0.844646 2077.0

The result of Model Number:Dataset Number:Featuregroup Number:Rescale of 89 : 0 : 1 :  
1

|              | f1-score | precision | recall   | support |
|--------------|----------|-----------|----------|---------|
| AFIB         | 0.901060 | 0.924265  | 0.879028 | 204.0   |
| GSVT         | 0.826880 | 0.790073  | 0.933133 | 300.0   |
| SB           | 0.948670 | 0.946451  | 0.950902 | 892.0   |
| SR           | 0.752598 | 0.752739  | 0.752466 | 681.0   |
| macro avg    | 0.857302 | 0.853382  | 0.878882 | 2077.0  |
| micro avg    | 0.876214 | 0.876214  | 0.876214 | 2077.0  |
| weighted avg | 0.862115 | 0.858171  | 0.876214 | 2077.0  |

The result of Model Number:Dataset Number:Featuregroup Number:Rescale of 89 : 0 : 2 :  
0

|              | f1-score | precision | recall   | support |
|--------------|----------|-----------|----------|---------|
| AFIB         | 0.857097 | 0.865860  | 0.848581 | 875.0   |
| GSVT         | 0.856839 | 0.843602  | 0.870599 | 691.0   |
| SB           | 0.903850 | 0.898453  | 0.909321 | 1553.0  |
| SR           | 0.879927 | 0.891705  | 0.868483 | 907.0   |
| macro avg    | 0.874428 | 0.874905  | 0.874246 | 4026.0  |
| micro avg    | 0.880273 | 0.880273  | 0.880273 | 4026.0  |
| weighted avg | 0.880231 | 0.880435  | 0.880273 | 4026.0  |

The result of Model Number:Dataset Number:Featuregroup Number:Rescale of 89 : 0 : 2 :  
1

|              | f1-score | precision | recall   | support |
|--------------|----------|-----------|----------|---------|
| AFIB         | 0.828219 | 0.820240  | 0.836483 | 875.0   |
| GSVT         | 0.849918 | 0.852350  | 0.847589 | 691.0   |
| SB           | 0.903610 | 0.901532  | 0.905703 | 1553.0  |
| SR           | 0.878191 | 0.888524  | 0.868114 | 907.0   |
| macro avg    | 0.864984 | 0.865661  | 0.864472 | 4026.0  |
| micro avg    | 0.872216 | 0.872216  | 0.872216 | 4026.0  |
| weighted avg | 0.872283 | 0.872492  | 0.872216 | 4026.0  |

The result of Model Number:Dataset Number:Featuregroup Number:Rescale of 89 : 0 : 3 :  
0

|              | f1-score | precision | recall   | support |
|--------------|----------|-----------|----------|---------|
| AFIB         | 0.641970 | 0.634398  | 0.649758 | 875.0   |
| GSVT         | 0.652845 | 0.656976  | 0.648790 | 691.0   |
| SB           | 0.696059 | 0.695123  | 0.697000 | 1553.0  |
| SR           | 0.678959 | 0.685391  | 0.672669 | 907.0   |
| macro avg    | 0.667459 | 0.667972  | 0.667054 | 4026.0  |
| micro avg    | 0.672977 | 0.672977  | 0.672977 | 4026.0  |
| weighted avg | 0.673034 | 0.673186  | 0.672977 | 4026.0  |

The result of Model Number:Dataset Number:Featuregroup Number:Rescale of 89 : 0 : 3 :  
1

|      | f1-score | precision | recall   | support |
|------|----------|-----------|----------|---------|
| AFIB | 0.715574 | 0.720767  | 0.710506 | 875.0   |

GSVT 0.731270 0.724473 0.738251 691.0  
SB 0.785901 0.781156 0.790708 1553.0  
SR 0.760144 0.768632 0.751845 907.0  
macro avg 0.748222 0.748757 0.747827 4026.0  
micro avg 0.755518 0.755518 0.755518 4026.0  
weighted avg 0.755437 0.755481 0.755518 4026.0  
The result of Model Number:Dataset Number:Featuregroup Number:Rescale of 89 : 0 : 4 :  
0

f1-score precision recall support  
AFIB 0.838400 0.847337 0.829787 204.0  
GSVT 0.853819 0.849135 0.858649 300.0  
SB 0.873528 0.872072 0.874994 892.0  
SR 0.866246 0.867657 0.864851 681.0  
macro avg 0.857998 0.859050 0.857070 2077.0  
micro avg 0.864867 0.864867 0.864867 2077.0  
weighted avg 0.864844 0.864882 0.864867 2077.0  
The result of Model Number:Dataset Number:Featuregroup Number:Rescale of 89 : 0 : 4 :  
1

f1-score precision recall support  
AFIB 0.696260 0.725558 0.669300 204.0  
GSVT 0.719621 0.708606 0.731093 300.0  
SB 0.736978 0.731692 0.742349 892.0  
SR 0.717850 0.721501 0.714264 681.0  
macro avg 0.717677 0.721839 0.714251 2077.0  
micro avg 0.724340 0.724340 0.724340 2077.0  
weighted avg 0.724200 0.724413 0.724340 2077.0  
The result of Model Number:Dataset Number:Featuregroup Number:Rescale of 89 : 0 : 5 :  
0

f1-score precision recall support  
AFIB 0.683413 0.694511 0.672701 875.0  
GSVT 0.726830 0.729108 0.724610 691.0  
SB 0.790754 0.788029 0.793502 1553.0  
SR 0.748614 0.740276 0.757187 907.0  
macro avg 0.737403 0.737981 0.737000 4026.0  
micro avg 0.747242 0.747242 0.747242 4026.0  
weighted avg 0.746960 0.746833 0.747242 4026.0  
The result of Model Number:Dataset Number:Featuregroup Number:Rescale of 89 : 0 : 5 :  
1

f1-score precision recall support  
AFIB 0.887585 0.898484 0.877086 204.0  
GSVT 0.905463 0.901595 0.909385 300.0  
SB 0.916423 0.913672 0.919195 892.0  
SR 0.908710 0.910872 0.906587 681.0  
macro avg 0.904545 0.906156 0.903063 2077.0

micro avg 0.909508 0.909508 0.909508 2077.0  
weighted avg 0.909479 0.909518 0.909508 2077.0  
The result of Model Number:Dataset Number:Featuregroup Number:Rescale of 89 : 0 : 6 :  
0

|              | f1-score | precision | recall   | support |
|--------------|----------|-----------|----------|---------|
| AFIB         | 0.660766 | 0.641729  | 0.724987 | 875.0   |
| GSVT         | 0.728253 | 0.725927  | 0.730688 | 691.0   |
| SB           | 0.614753 | 0.605693  | 0.624138 | 1553.0  |
| SR           | 0.736093 | 0.750460  | 0.722358 | 907.0   |
| macro avg    | 0.684966 | 0.680952  | 0.700543 | 4026.0  |
| micro avg    | 0.686471 | 0.686471  | 0.686471 | 4026.0  |
| weighted avg | 0.671570 | 0.666775  | 0.686471 | 4026.0  |

The result of Model Number:Dataset Number:Featuregroup Number:Rescale of 89 : 0 : 6 :  
1

|              | f1-score | precision | recall   | support |
|--------------|----------|-----------|----------|---------|
| AFIB         | 0.778608 | 0.796944  | 0.761163 | 875.0   |
| GSVT         | 0.820768 | 0.822841  | 0.818760 | 691.0   |
| SB           | 0.892600 | 0.888900  | 0.896335 | 1553.0  |
| SR           | 0.849315 | 0.835939  | 0.863166 | 907.0   |
| macro avg    | 0.835323 | 0.836156  | 0.834856 | 4026.0  |
| micro avg    | 0.846170 | 0.846170  | 0.846170 | 4026.0  |
| weighted avg | 0.845745 | 0.845645  | 0.846170 | 4026.0  |

The result of Model Number:Dataset Number:Featuregroup Number:Rescale of 89 : 0 : 7 :  
0

|              | f1-score | precision | recall   | support |
|--------------|----------|-----------|----------|---------|
| AFIB         | 0.789785 | 0.767879  | 0.815462 | 875.0   |
| GSVT         | 0.800095 | 0.833796  | 0.773935 | 691.0   |
| SB           | 0.878932 | 0.878488  | 0.879388 | 1553.0  |
| SR           | 0.856882 | 0.862244  | 0.851592 | 907.0   |
| macro avg    | 0.831423 | 0.835602  | 0.830094 | 4026.0  |
| micro avg    | 0.841133 | 0.841133  | 0.841133 | 4026.0  |
| weighted avg | 0.841058 | 0.843118  | 0.841133 | 4026.0  |

The result of Model Number:Dataset Number:Featuregroup Number:Rescale of 89 : 0 : 7 :  
1

|              | f1-score | precision | recall   | support |
|--------------|----------|-----------|----------|---------|
| AFIB         | 0.722876 | 0.725514  | 0.720305 | 875.0   |
| GSVT         | 0.735370 | 0.725794  | 0.745264 | 691.0   |
| SB           | 0.775154 | 0.766616  | 0.783889 | 1553.0  |
| SR           | 0.734624 | 0.754917  | 0.715433 | 907.0   |
| macro avg    | 0.742006 | 0.743210  | 0.741223 | 4026.0  |
| micro avg    | 0.748018 | 0.748018  | 0.748018 | 4026.0  |
| weighted avg | 0.747833 | 0.748041  | 0.748018 | 4026.0  |

The result of Model Number:Dataset Number:Featuregroup Number:Rescale of 89 : 0 : 8 :  
0

f1-score precision recall support  
AFIB 0.844093 0.843150 0.845063 875.0  
GSVT 0.859533 0.848782 0.870584 691.0  
SB 0.902935 0.895675 0.910319 1553.0  
SR 0.862650 0.885284 0.841158 907.0  
macro avg 0.867303 0.868223 0.866781 4026.0  
micro avg 0.873736 0.873736 0.873736 4026.0  
weighted avg 0.873621 0.873870 0.873736 4026.0  
The result of Model Number:Dataset Number:Featuregroup Number:Rescale of 89 : 0 : 8 :  
1

f1-score precision recall support  
AFIB 0.718526 0.722469 0.714671 875.0  
GSVT 0.719531 0.710434 0.728976 691.0  
SB 0.756711 0.753674 0.759778 1553.0  
SR 0.740467 0.749456 0.731737 907.0  
macro avg 0.733808 0.734008 0.733791 4026.0  
micro avg 0.738371 0.738371 0.738371 4026.0  
weighted avg 0.738371 0.738520 0.738371 4026.0  
The result of Model Number:Dataset Number:Featuregroup Number:Rescale of 89 : 0 : 9 :  
0

f1-score precision recall support  
AFIB 0.833295 0.868538 0.801078 204.0  
GSVT 0.767404 0.768748 0.777577 300.0  
SB 0.826182 0.786823 0.870487 892.0  
SR 0.730385 0.789212 0.681041 681.0  
macro avg 0.789317 0.803330 0.782546 2077.0  
micro avg 0.788135 0.788135 0.788135 2077.0  
weighted avg 0.786981 0.793022 0.788135 2077.0  
The result of Model Number:Dataset Number:Featuregroup Number:Rescale of 89 : 0 : 9 :  
1

f1-score precision recall support  
AFIB 0.874189 0.947166 0.813395 204.0  
GSVT 0.937669 0.925878 0.950146 300.0  
SB 0.961606 0.948134 0.975578 892.0  
SR 0.935375 0.939757 0.931490 681.0  
macro avg 0.927210 0.940234 0.917652 2077.0  
micro avg 0.941520 0.941520 0.941520 2077.0  
weighted avg 0.940962 0.942078 0.941520 2077.0  
The result of Model Number:Dataset Number:Featuregroup Number:Rescale of 89 : 0 :  
10 : 0

f1-score precision recall support  
AFIB 0.886641 0.903722 0.870612 204.0  
GSVT 0.903290 0.888613 0.918624 300.0  
SB 0.918371 0.907418 0.929594 892.0

SR 0.901287 0.918185 0.885015 681.0  
macro avg 0.902397 0.904485 0.900961 2077.0  
micro avg 0.907600 0.907600 0.907600 2077.0  
weighted avg 0.907475 0.907869 0.907600 2077.0  
The result of Model Number:Dataset Number:Featuregroup Number:Rescale of 89 : 0 :

10 : 1

f1-score precision recall support

AFIB 0.836880 0.854434 0.820055 204.0  
GSVT 0.856294 0.851227 0.861430 300.0  
SB 0.877170 0.875115 0.879234 892.0  
SR 0.869760 0.869510 0.870018 681.0  
macro avg 0.860026 0.862572 0.857684 2077.0  
micro avg 0.867828 0.867828 0.867828 2077.0  
weighted avg 0.867768 0.867796 0.867828 2077.0

The result of Model Number:Dataset Number:Featuregroup Number:Rescale of 89 : 1 : 0 :  
0

f1-score precision recall support

AFIB 0.652433 0.718258 0.598043 204.0  
GSVT 0.769409 0.758789 0.780454 300.0  
SB 0.816963 0.814238 0.819711 892.0  
SR 0.796042 0.785029 0.807379 681.0  
macro avg 0.758712 0.769078 0.751397 2077.0  
micro avg 0.788225 0.788225 0.788225 2077.0  
weighted avg 0.787075 0.787225 0.788225 2077.0

The result of Model Number:Dataset Number:Featuregroup Number:Rescale of 89 : 1 : 0 :  
1

f1-score precision recall support

AFIB 0.865020 0.886067 0.845163 204.0  
GSVT 0.875894 0.863836 0.888410 300.0  
SB 0.893580 0.884656 0.902691 892.0  
SR 0.877978 0.889500 0.866776 681.0  
macro avg 0.878118 0.881015 0.875760 2077.0  
micro avg 0.883203 0.883203 0.883203 2077.0  
weighted avg 0.883105 0.883376 0.883203 2077.0

The result of Model Number:Dataset Number:Featuregroup Number:Rescale of 89 : 1 : 1 :  
0

f1-score precision recall support

AFIB 0.927789 0.941855 0.914160 204.0  
GSVT 0.942707 0.934760 0.950840 300.0  
SB 0.963618 0.960510 0.966749 892.0  
SR 0.953274 0.956815 0.949785 681.0  
macro avg 0.946847 0.948485 0.945384 2077.0  
micro avg 0.953724 0.953724 0.953724 2077.0  
weighted avg 0.953687 0.953747 0.953724 2077.0



The result of Model Number:Dataset Number:Featuregroup Number:Rescale of 89 : 1 : 1 : 1

|              | f1-score | precision | recall   | support |
|--------------|----------|-----------|----------|---------|
| AFIB         | 0.669581 | 0.691329  | 0.649291 | 204.0   |
| GSVT         | 0.688067 | 0.679294  | 0.697209 | 300.0   |
| SB           | 0.707479 | 0.704811  | 0.710175 | 892.0   |
| SR           | 0.697584 | 0.698848  | 0.696352 | 681.0   |
| macro avg    | 0.690678 | 0.693570  | 0.688257 | 2077.0  |
| micro avg    | 0.697790 | 0.697790  | 0.697790 | 2077.0  |
| weighted avg | 0.697709 | 0.697846  | 0.697790 | 2077.0  |

The result of Model Number:Dataset Number:Featuregroup Number:Rescale of 89 : 1 : 2 : 0

|              | f1-score | precision | recall   | support |
|--------------|----------|-----------|----------|---------|
| AFIB         | 0.648906 | 0.650517  | 0.647346 | 875.0   |
| GSVT         | 0.660081 | 0.662064  | 0.658193 | 691.0   |
| SB           | 0.700227 | 0.695474  | 0.705050 | 1553.0  |
| SR           | 0.686902 | 0.692001  | 0.681904 | 907.0   |
| macro avg    | 0.674029 | 0.675014  | 0.673123 | 4026.0  |
| micro avg    | 0.679252 | 0.679252  | 0.679252 | 4026.0  |
| weighted avg | 0.679180 | 0.679186  | 0.679252 | 4026.0  |

The result of Model Number:Dataset Number:Featuregroup Number:Rescale of 89 : 1 : 2 : 1

|              | f1-score | precision | recall   | support |
|--------------|----------|-----------|----------|---------|
| AFIB         | 0.141594 | 0.143081  | 0.140138 | 175.0   |
| GSVT         | 0.141822 | 0.140316  | 0.143362 | 138.2   |
| SB           | 0.149364 | 0.148791  | 0.149941 | 310.6   |
| SR           | 0.145907 | 0.146638  | 0.145183 | 181.4   |
| macro avg    | 0.144672 | 0.144707  | 0.144656 | 805.2   |
| micro avg    | 0.145609 | 0.145609  | 0.145609 | 805.2   |
| weighted avg | 0.145602 | 0.145611  | 0.145609 | 805.2   |

The result of Model Number:Dataset Number:Featuregroup Number:Rescale of 89 : 1 : 3 : 0

|              | f1-score | precision | recall   | support |
|--------------|----------|-----------|----------|---------|
| AFIB         | 0.841901 | 0.834099  | 0.849899 | 875.0   |
| GSVT         | 0.857021 | 0.861675  | 0.852431 | 691.0   |
| SB           | 0.908062 | 0.905969  | 0.910167 | 1553.0  |
| SR           | 0.886906 | 0.895090  | 0.878897 | 907.0   |
| macro avg    | 0.873473 | 0.874208  | 0.872849 | 4026.0  |
| micro avg    | 0.880114 | 0.880114  | 0.880114 | 4026.0  |
| weighted avg | 0.880156 | 0.880296  | 0.880114 | 4026.0  |

The result of Model Number:Dataset Number:Featuregroup Number:Rescale of 89 : 1 : 3 : 1

|      | f1-score | precision | recall   | support |
|------|----------|-----------|----------|---------|
| AFIB | 0.808745 | 0.805591  | 0.811981 | 875.0   |

GSVT 0.823881 0.825618 0.822199 691.0  
SB 0.874577 0.872397 0.876773 1553.0  
SR 0.854402 0.860141 0.848757 907.0  
macro avg 0.840401 0.840937 0.839928 4026.0  
micro avg 0.847013 0.847013 0.847013 4026.0  
weighted avg 0.847023 0.847087 0.847013 4026.0  
The result of Model Number:Dataset Number:Featuregroup Number:Rescale of 89 : 1 : 4 :  
0

f1-score precision recall support  
AFIB 0.864185 0.877144 0.851849 204.0  
GSVT 0.895392 0.893014 0.897787 300.0  
SB 0.916602 0.915380 0.917834 892.0  
SR 0.907637 0.906467 0.908839 681.0  
macro avg 0.895954 0.898001 0.894077 2077.0  
micro avg 0.905508 0.905508 0.905508 2077.0  
weighted avg 0.905450 0.905472 0.905508 2077.0  
The result of Model Number:Dataset Number:Featuregroup Number:Rescale of 89 : 1 : 4 :  
1

f1-score precision recall support  
AFIB 0.654320 0.608468 0.768374 875.0  
GSVT 0.561163 0.523924 0.634732 691.0  
SB 0.670554 0.664897 0.676324 1553.0  
SR 0.646317 0.661983 0.631601 907.0  
macro avg 0.633088 0.614818 0.677758 4026.0  
micro avg 0.679116 0.679116 0.679116 4026.0  
weighted avg 0.642790 0.627780 0.679116 4026.0  
The result of Model Number:Dataset Number:Featuregroup Number:Rescale of 89 : 1 : 5 :  
0

f1-score precision recall support  
AFIB 0.699426 0.734372 0.668006 204.0  
GSVT 0.720512 0.707159 0.734630 300.0  
SB 0.737001 0.729572 0.744598 892.0  
SR 0.716561 0.722962 0.710338 681.0  
macro avg 0.718375 0.723516 0.714393 2077.0  
micro avg 0.724403 0.724403 0.724403 2077.0  
weighted avg 0.724227 0.724639 0.724403 2077.0  
The result of Model Number:Dataset Number:Featuregroup Number:Rescale of 89 : 1 : 5 :  
1

f1-score precision recall support  
AFIB 0.855130 0.856286 0.854139 875.0  
GSVT 0.868448 0.868002 0.868928 691.0  
SB 0.907005 0.903759 0.910276 1553.0  
SR 0.885285 0.890247 0.880434 907.0  
macro avg 0.878967 0.879574 0.878444 4026.0

micro avg 0.884256 0.884256 0.884256 4026.0  
weighted avg 0.884219 0.884260 0.884256 4026.0  
The result of Model Number:Dataset Number:Featuregroup Number:Rescale of 89 : 1 : 6 :  
0

|              | f1-score | precision | recall   | support |
|--------------|----------|-----------|----------|---------|
| AFIB         | 0.679538 | 0.681623  | 0.677572 | 204.0   |
| GSVT         | 0.697388 | 0.695616  | 0.699232 | 300.0   |
| SB           | 0.712967 | 0.712096  | 0.713845 | 892.0   |
| SR           | 0.707132 | 0.708491  | 0.705784 | 681.0   |
| macro avg    | 0.699256 | 0.699457  | 0.699108 | 2077.0  |
| micro avg    | 0.705528 | 0.705528  | 0.705528 | 2077.0  |
| weighted avg | 0.705520 | 0.705541  | 0.705528 | 2077.0  |

The result of Model Number:Dataset Number:Featuregroup Number:Rescale of 89 : 1 : 6 :  
1

|              | f1-score | precision | recall   | support |
|--------------|----------|-----------|----------|---------|
| AFIB         | 0.887094 | 0.891299  | 0.882934 | 875.0   |
| GSVT         | 0.898098 | 0.893861  | 0.902396 | 691.0   |
| SB           | 0.947284 | 0.945284  | 0.949297 | 1553.0  |
| SR           | 0.929333 | 0.931935  | 0.926767 | 907.0   |
| macro avg    | 0.915452 | 0.915595  | 0.915348 | 4026.0  |
| micro avg    | 0.921748 | 0.921748  | 0.921748 | 4026.0  |
| weighted avg | 0.921716 | 0.921718  | 0.921748 | 4026.0  |

The result of Model Number:Dataset Number:Featuregroup Number:Rescale of 89 : 1 : 7 :  
0

|              | f1-score | precision | recall   | support |
|--------------|----------|-----------|----------|---------|
| AFIB         | 0.830217 | 0.839924  | 0.820891 | 204.0   |
| GSVT         | 0.853056 | 0.849134  | 0.857038 | 300.0   |
| SB           | 0.865134 | 0.862444  | 0.867847 | 892.0   |
| SR           | 0.857683 | 0.860114  | 0.855302 | 681.0   |
| macro avg    | 0.851522 | 0.852904  | 0.850270 | 2077.0  |
| micro avg    | 0.857561 | 0.857561  | 0.857561 | 2077.0  |
| weighted avg | 0.857517 | 0.857545  | 0.857561 | 2077.0  |

The result of Model Number:Dataset Number:Featuregroup Number:Rescale of 89 : 1 : 7 :  
1

|              | f1-score | precision | recall   | support |
|--------------|----------|-----------|----------|---------|
| AFIB         | 0.857014 | 0.854536  | 0.859584 | 875.0   |
| GSVT         | 0.872898 | 0.872188  | 0.873670 | 691.0   |
| SB           | 0.927144 | 0.923304  | 0.931024 | 1553.0  |
| SR           | 0.899310 | 0.909190  | 0.889691 | 907.0   |
| macro avg    | 0.889091 | 0.889804  | 0.888492 | 4026.0  |
| micro avg    | 0.896342 | 0.896342  | 0.896342 | 4026.0  |
| weighted avg | 0.896321 | 0.896405  | 0.896342 | 4026.0  |

The result of Model Number:Dataset Number:Featuregroup Number:Rescale of 89 : 1 : 8 :  
0

f1-score precision recall support  
AFIB 0.694100 0.699602 0.688702 875.0  
GSVT 0.702900 0.699801 0.706050 691.0  
SB 0.747451 0.744496 0.750435 1553.0  
SR 0.729084 0.731144 0.727071 907.0  
macro avg 0.718384 0.718761 0.718064 4026.0  
micro avg 0.724137 0.724137 0.724137 4026.0  
weighted avg 0.724072 0.724060 0.724137 4026.0  
The result of Model Number:Dataset Number:Featuregroup Number:Rescale of 89 : 1 : 8 :  
1

f1-score precision recall support  
AFIB 0.732768 0.771350 0.698058 204.0  
GSVT 0.769564 0.762824 0.776459 300.0  
SB 0.789533 0.784659 0.794482 892.0  
SR 0.778761 0.777182 0.780366 681.0  
macro avg 0.767656 0.774003 0.762341 2077.0  
micro avg 0.777780 0.777780 0.777780 2077.0  
weighted avg 0.777541 0.777746 0.777780 2077.0  
The result of Model Number:Dataset Number:Featuregroup Number:Rescale of 89 : 1 : 9 :  
0

f1-score precision recall support  
AFIB 0.756751 0.762860 0.750803 204.0  
GSVT 0.774115 0.770319 0.777975 300.0  
SB 0.789223 0.788348 0.790107 892.0  
SR 0.783330 0.784372 0.782297 681.0  
macro avg 0.775855 0.776475 0.775296 2077.0  
micro avg 0.781934 0.781934 0.781934 2077.0  
weighted avg 0.781919 0.781937 0.781934 2077.0  
The result of Model Number:Dataset Number:Featuregroup Number:Rescale of 89 : 1 : 9 :  
1

f1-score precision recall support  
AFIB 0.915106 0.928408 0.902593 204.0  
GSVT 0.935287 0.922634 0.948368 300.0  
SB 0.949364 0.939470 0.959475 892.0  
SR 0.930547 0.945946 0.915658 681.0  
macro avg 0.932576 0.934114 0.931524 2077.0  
micro avg 0.937917 0.937917 0.937917 2077.0  
weighted avg 0.937796 0.938075 0.937917 2077.0  
The result of Model Number:Dataset Number:Featuregroup Number:Rescale of 89 : 1 :  
10 : 0

f1-score precision recall support  
AFIB 0.756549 0.759638 0.753508 875.0  
GSVT 0.704493 0.735585 0.676039 691.0  
SB 0.756584 0.685367 0.844328 1553.0

SR 0.570717 0.710311 0.477171 907.0  
macro avg 0.697086 0.722725 0.687761 4026.0  
micro avg 0.712990 0.712990 0.712990 4026.0  
weighted avg 0.705763 0.715747 0.712990 4026.0  
The result of Model Number:Dataset Number:Featuregroup Number:Rescale of 89 : 1 : 10 : 1

f1-score precision recall support  
AFIB 0.670785 0.679856 0.662234 204.0  
GSVT 0.696264 0.695134 0.697423 300.0  
SB 0.711384 0.710437 0.712341 892.0  
SR 0.704113 0.703211 0.705043 681.0  
macro avg 0.695637 0.697160 0.694260 2077.0  
micro avg 0.702872 0.702872 0.702872 2077.0  
weighted avg 0.702829 0.702854 0.702872 2077.0

The result of Model Number:Dataset Number:Featuregroup Number:Rescale of 90 : 0 : 0 : 0

f1-score precision recall support  
AFIB 0.871223 0.879259 0.863544 204.0  
GSVT 0.903075 0.903107 0.903067 300.0  
SB 0.921988 0.920350 0.923639 892.0  
SR 0.912203 0.911959 0.912469 681.0  
macro avg 0.902122 0.903669 0.900680 2077.0  
micro avg 0.911103 0.911103 0.911103 2077.0  
weighted avg 0.911062 0.911072 0.911103 2077.0

The result of Model Number:Dataset Number:Featuregroup Number:Rescale of 90 : 0 : 0 : 1

f1-score precision recall support  
AFIB 0.802777 0.797351 0.808386 875.0  
GSVT 0.822362 0.822689 0.822141 691.0  
SB 0.873592 0.871363 0.875842 1553.0  
SR 0.849805 0.859300 0.840530 907.0  
macro avg 0.837134 0.837676 0.836725 4026.0  
micro avg 0.844009 0.844009 0.844009 4026.0  
weighted avg 0.844050 0.844206 0.844009 4026.0

The result of Model Number:Dataset Number:Featuregroup Number:Rescale of 90 : 0 : 1 : 0

f1-score precision recall support  
AFIB 0.681586 0.728123 0.640930 204.0  
GSVT 0.720504 0.705821 0.735873 300.0  
SB 0.738375 0.731901 0.744991 892.0  
SR 0.720161 0.722560 0.717843 681.0  
macro avg 0.715156 0.722101 0.709909 2077.0  
micro avg 0.724552 0.724552 0.724552 2077.0  
weighted avg 0.724244 0.724700 0.724552 2077.0

The result of Model Number:Dataset Number:Featuregroup Number:Rescale of 90 : 0 : 1 : 1

|              | f1-score | precision | recall   | support |
|--------------|----------|-----------|----------|---------|
| AFIB         | 0.720171 | 0.719367  | 0.720999 | 875.0   |
| GSVT         | 0.733344 | 0.724172  | 0.742773 | 691.0   |
| SB           | 0.770374 | 0.764181  | 0.776674 | 1553.0  |
| SR           | 0.736004 | 0.755315  | 0.717667 | 907.0   |
| macro avg    | 0.739973 | 0.740758  | 0.739528 | 4026.0  |
| micro avg    | 0.745462 | 0.745462  | 0.745462 | 4026.0  |
| weighted avg | 0.745364 | 0.745577  | 0.745462 | 4026.0  |

The result of Model Number:Dataset Number:Featuregroup Number:Rescale of 90 : 0 : 2 : 0

|              | f1-score | precision | recall   | support |
|--------------|----------|-----------|----------|---------|
| AFIB         | 0.681036 | 0.684411  | 0.677767 | 875.0   |
| GSVT         | 0.687817 | 0.688808  | 0.686933 | 691.0   |
| SB           | 0.724020 | 0.720661  | 0.727419 | 1553.0  |
| SR           | 0.710692 | 0.712472  | 0.708960 | 907.0   |
| macro avg    | 0.700891 | 0.701588  | 0.700270 | 4026.0  |
| micro avg    | 0.705521 | 0.705521  | 0.705521 | 4026.0  |
| weighted avg | 0.705462 | 0.705471  | 0.705521 | 4026.0  |

The result of Model Number:Dataset Number:Featuregroup Number:Rescale of 90 : 0 : 2 : 1

|              | f1-score | precision | recall   | support |
|--------------|----------|-----------|----------|---------|
| AFIB         | 0.182036 | 0.183948  | 0.180164 | 175.0   |
| GSVT         | 0.182330 | 0.180393  | 0.184309 | 138.2   |
| SB           | 0.192025 | 0.191289  | 0.192767 | 310.6   |
| SR           | 0.187581 | 0.188521  | 0.186650 | 181.4   |
| macro avg    | 0.185993 | 0.186038  | 0.185972 | 805.2   |
| micro avg    | 0.187198 | 0.187198  | 0.187198 | 805.2   |
| weighted avg | 0.187189 | 0.187200  | 0.187198 | 805.2   |

The result of Model Number:Dataset Number:Featuregroup Number:Rescale of 90 : 0 : 3 : 0

|              | f1-score | precision | recall   | support |
|--------------|----------|-----------|----------|---------|
| AFIB         | 0.750084 | 0.770762  | 0.730638 | 204.0   |
| GSVT         | 0.770046 | 0.755792  | 0.784922 | 300.0   |
| SB           | 0.782535 | 0.775219  | 0.789992 | 892.0   |
| SR           | 0.762866 | 0.773230  | 0.752789 | 681.0   |
| macro avg    | 0.766383 | 0.768751  | 0.764585 | 2077.0  |
| micro avg    | 0.771232 | 0.771232  | 0.771232 | 2077.0  |
| weighted avg | 0.771095 | 0.771323  | 0.771232 | 2077.0  |

The result of Model Number:Dataset Number:Featuregroup Number:Rescale of 90 : 0 : 3 : 1

|      | f1-score | precision | recall   | support |
|------|----------|-----------|----------|---------|
| AFIB | 0.787273 | 0.805974  | 0.769492 | 204.0   |

GSVT 0.813132 0.805508 0.820987 300.0  
SB 0.830595 0.829666 0.831526 892.0  
SR 0.822578 0.821751 0.823420 681.0  
macro avg 0.813394 0.815725 0.811356 2077.0  
micro avg 0.821253 0.821253 0.821253 2077.0  
weighted avg 0.821189 0.821255 0.821253 2077.0  
The result of Model Number:Dataset Number:Featuregroup Number:Rescale of 90 : 0 : 4 :  
0

f1-score precision recall support

AFIB 0.752030 0.778329 0.727797 204.0  
GSVT 0.783789 0.779011 0.788733 300.0  
SB 0.799884 0.796597 0.803200 892.0  
SR 0.792489 0.791334 0.793653 681.0  
macro avg 0.782048 0.786318 0.778346 2077.0  
micro avg 0.790574 0.790574 0.790574 2077.0  
weighted avg 0.790434 0.790537 0.790574 2077.0  
The result of Model Number:Dataset Number:Featuregroup Number:Rescale of 90 : 0 : 4 :  
1

f1-score precision recall support

AFIB 0.867852 0.874713 0.861127 875.0  
GSVT 0.889690 0.887809 0.891612 691.0  
SB 0.948436 0.940052 0.956981 1553.0  
SR 0.923187 0.932241 0.914329 907.0  
macro avg 0.907291 0.908704 0.906012 4026.0  
micro avg 0.915320 0.915320 0.915320 4026.0  
weighted avg 0.915151 0.915125 0.915320 4026.0  
The result of Model Number:Dataset Number:Featuregroup Number:Rescale of 90 : 0 : 5 :  
0

f1-score precision recall support

AFIB 0.740876 0.820902 0.675202 204.0  
GSVT 0.858833 0.844866 0.873406 300.0  
SB 0.915893 0.911723 0.920102 892.0  
SR 0.893763 0.882389 0.905446 681.0  
macro avg 0.852341 0.864970 0.843539 2077.0  
micro avg 0.884498 0.884498 0.884498 2077.0  
weighted avg 0.883205 0.883528 0.884498 2077.0  
The result of Model Number:Dataset Number:Featuregroup Number:Rescale of 90 : 0 : 5 :  
1

f1-score precision recall support

AFIB 0.734031 0.735024 0.733181 875.0  
GSVT 0.745464 0.745080 0.745875 691.0  
SB 0.778560 0.775774 0.781368 1553.0  
SR 0.759916 0.764175 0.755752 907.0  
macro avg 0.754492 0.755013 0.754044 4026.0

micro avg 0.759032 0.759032 0.759032 4026.0  
weighted avg 0.759001 0.759036 0.759032 4026.0  
The result of Model Number:Dataset Number:Featuregroup Number:Rescale of 90 : 0 : 6 :  
0

f1-score precision recall support  
AFIB 0.631533 0.692318 0.580776 204.0  
GSVT 0.734475 0.726928 0.742318 300.0  
SB 0.778600 0.775572 0.781654 892.0  
SR 0.760560 0.750043 0.771390 681.0  
macro avg 0.726292 0.736215 0.719034 2077.0  
micro avg 0.752877 0.752877 0.752877 2077.0  
weighted avg 0.751867 0.751998 0.752877 2077.0

The result of Model Number:Dataset Number:Featuregroup Number:Rescale of 90 : 0 : 6 :  
1

f1-score precision recall support  
AFIB 0.682605 0.717871 0.650846 204.0  
GSVT 0.715770 0.708774 0.722922 300.0  
SB 0.728391 0.722531 0.734350 892.0  
SR 0.719394 0.720269 0.718549 681.0  
macro avg 0.711540 0.717361 0.706667 2077.0  
micro avg 0.719317 0.719317 0.719317 2077.0  
weighted avg 0.719121 0.719345 0.719317 2077.0

The result of Model Number:Dataset Number:Featuregroup Number:Rescale of 90 : 0 : 7 :  
0

f1-score precision recall support  
AFIB 0.800942 0.805027 0.796923 875.0  
GSVT 0.811995 0.807770 0.816334 691.0  
SB 0.851097 0.850337 0.851866 1553.0  
SR 0.835426 0.836107 0.834780 907.0  
macro avg 0.824865 0.824810 0.824976 4026.0  
micro avg 0.829977 0.829977 0.829977 4026.0  
weighted avg 0.829955 0.829978 0.829977 4026.0

The result of Model Number:Dataset Number:Featuregroup Number:Rescale of 90 : 0 : 7 :  
1

f1-score precision recall support  
AFIB 0.713828 0.796140 0.647035 204.0  
GSVT 0.841676 0.827026 0.857033 300.0  
SB 0.898650 0.894666 0.902678 892.0  
SR 0.877795 0.865793 0.890162 681.0  
macro avg 0.832987 0.845906 0.824227 2077.0  
micro avg 0.866872 0.866872 0.866872 2077.0  
weighted avg 0.865430 0.865752 0.866872 2077.0

The result of Model Number:Dataset Number:Featuregroup Number:Rescale of 90 : 0 : 8 :  
0



f1-score precision recall support  
AFIB 0.751215 0.698573 0.882159 875.0  
GSVT 0.644264 0.601510 0.728727 691.0  
SB 0.769854 0.763358 0.776478 1553.0  
SR 0.742027 0.760013 0.725132 907.0  
macro avg 0.726840 0.705864 0.778124 4026.0  
micro avg 0.779683 0.779683 0.779683 4026.0  
weighted avg 0.737978 0.720746 0.779683 4026.0  
The result of Model Number:Dataset Number:Featuregroup Number:Rescale of 90 : 0 : 8 :  
1

f1-score precision recall support  
AFIB 0.712145 0.712272 0.712049 875.0  
GSVT 0.719679 0.722110 0.717310 691.0  
SB 0.755986 0.753379 0.758614 1553.0  
SR 0.741630 0.744132 0.739173 907.0  
macro avg 0.732360 0.732973 0.731786 4026.0  
micro avg 0.737025 0.737025 0.737025 4026.0  
weighted avg 0.736992 0.736995 0.737025 4026.0  
The result of Model Number:Dataset Number:Featuregroup Number:Rescale of 90 : 0 : 9 :  
0

f1-score precision recall support  
AFIB 0.686262 0.694689 0.678144 204.0  
GSVT 0.700084 0.697094 0.703117 300.0  
SB 0.708559 0.706432 0.710702 892.0  
SR 0.702595 0.704267 0.700953 681.0  
macro avg 0.699375 0.700621 0.698229 2077.0  
micro avg 0.703212 0.703212 0.703212 2077.0  
weighted avg 0.703190 0.703220 0.703212 2077.0  
The result of Model Number:Dataset Number:Featuregroup Number:Rescale of 90 : 0 : 9 :  
1

f1-score precision recall support  
AFIB 0.782590 0.782730 0.782485 875.0  
GSVT 0.790870 0.793542 0.788266 691.0  
SB 0.830768 0.827904 0.833656 1553.0  
SR 0.814992 0.817741 0.812292 907.0  
macro avg 0.804805 0.805479 0.804175 4026.0  
micro avg 0.809931 0.809931 0.809931 4026.0  
weighted avg 0.809895 0.809899 0.809931 4026.0  
The result of Model Number:Dataset Number:Featuregroup Number:Rescale of 90 : 0 :  
10 : 0

f1-score precision recall support  
AFIB 0.778127 0.782215 0.774129 875.0  
GSVT 0.791259 0.792728 0.789895 691.0  
SB 0.838051 0.832100 0.844093 1553.0

SR 0.821983 0.827048 0.817000 907.0  
macro avg 0.807355 0.808523 0.806279 4026.0  
micro avg 0.813481 0.813481 0.813481 4026.0  
weighted avg 0.813376 0.813362 0.813481 4026.0  
The result of Model Number:Dataset Number:Featuregroup Number:Rescale of 90 : 0 :  
10 : 1

f1-score precision recall support  
AFIB 0.762724 0.753560 0.772141 875.0  
GSVT 0.777394 0.783688 0.771204 691.0  
SB 0.828641 0.825470 0.831841 1553.0  
SR 0.809212 0.819559 0.799133 907.0  
macro avg 0.794493 0.795569 0.793580 4026.0  
micro avg 0.801090 0.801090 0.801090 4026.0  
weighted avg 0.801142 0.801338 0.801090 4026.0

The result of Model Number:Dataset Number:Featuregroup Number:Rescale of 90 : 1 : 0 :  
0

f1-score precision recall support  
AFIB 0.872111 0.865441 0.879001 875.0  
GSVT 0.892178 0.897057 0.887404 691.0  
SB 0.944744 0.944083 0.945414 1553.0  
SR 0.919650 0.924111 0.915280 907.0  
macro avg 0.907171 0.907673 0.906775 4026.0  
micro avg 0.914235 0.914235 0.914235 4026.0  
weighted avg 0.914283 0.914420 0.914235 4026.0

The result of Model Number:Dataset Number:Featuregroup Number:Rescale of 90 : 1 : 0 :  
1

f1-score precision recall support  
AFIB 0.862862 0.856884 0.869097 875.0  
GSVT 0.876173 0.879729 0.872788 691.0  
SB 0.950650 0.940765 0.960750 1553.0  
SR 0.902651 0.923654 0.882664 907.0  
macro avg 0.898084 0.900258 0.896325 4026.0  
micro avg 0.908141 0.908141 0.908141 4026.0  
weighted avg 0.907974 0.908204 0.908141 4026.0

The result of Model Number:Dataset Number:Featuregroup Number:Rescale of 90 : 1 : 1 :  
0

f1-score precision recall support  
AFIB 0.781431 0.787609 0.775376 875.0  
GSVT 0.801095 0.799401 0.802825 691.0  
SB 0.853990 0.846442 0.861685 1553.0  
SR 0.831256 0.839409 0.823280 907.0  
macro avg 0.816943 0.818215 0.815792 4026.0  
micro avg 0.824173 0.824173 0.824173 4026.0  
weighted avg 0.824020 0.823997 0.824173 4026.0

The result of Model Number:Dataset Number:Featuregroup Number:Rescale of 90 : 1 : 1 : 1

|              | f1-score | precision | recall   | support |
|--------------|----------|-----------|----------|---------|
| AFIB         | 0.741659 | 0.740085  | 0.743274 | 875.0   |
| GSVT         | 0.753246 | 0.749635  | 0.756955 | 691.0   |
| SB           | 0.792788 | 0.783324  | 0.802486 | 1553.0  |
| SR           | 0.755946 | 0.777363  | 0.735693 | 907.0   |
| macro avg    | 0.760910 | 0.762602  | 0.759602 | 4026.0  |
| micro avg    | 0.766755 | 0.766755  | 0.766755 | 4026.0  |
| weighted avg | 0.766589 | 0.766802  | 0.766755 | 4026.0  |

The result of Model Number:Dataset Number:Featuregroup Number:Rescale of 90 : 1 : 2 : 0

|              | f1-score | precision | recall   | support |
|--------------|----------|-----------|----------|---------|
| AFIB         | 0.664052 | 0.666476  | 0.661690 | 875.0   |
| GSVT         | 0.675530 | 0.666733  | 0.684619 | 691.0   |
| SB           | 0.712077 | 0.704234  | 0.720101 | 1553.0  |
| SR           | 0.674844 | 0.693487  | 0.657215 | 907.0   |
| macro avg    | 0.681626 | 0.682732  | 0.680906 | 4026.0  |
| micro avg    | 0.687149 | 0.687149  | 0.687149 | 4026.0  |
| weighted avg | 0.686979 | 0.687170  | 0.687149 | 4026.0  |

The result of Model Number:Dataset Number:Featuregroup Number:Rescale of 90 : 1 : 2 : 1

|              | f1-score | precision | recall   | support |
|--------------|----------|-----------|----------|---------|
| AFIB         | 0.890250 | 0.910589  | 0.871026 | 204.0   |
| GSVT         | 0.930693 | 0.924900  | 0.936583 | 300.0   |
| SB           | 0.950793 | 0.947844  | 0.953774 | 892.0   |
| SR           | 0.939905 | 0.940339  | 0.939496 | 681.0   |
| macro avg    | 0.927910 | 0.930918  | 0.925220 | 2077.0  |
| micro avg    | 0.938482 | 0.938482  | 0.938482 | 2077.0  |
| weighted avg | 0.938374 | 0.938410  | 0.938482 | 2077.0  |

The result of Model Number:Dataset Number:Featuregroup Number:Rescale of 90 : 1 : 3 : 0

|              | f1-score | precision | recall   | support |
|--------------|----------|-----------|----------|---------|
| AFIB         | 0.708550 | 0.723949  | 0.693985 | 204.0   |
| GSVT         | 0.737798 | 0.733446  | 0.742223 | 300.0   |
| SB           | 0.753649 | 0.751978  | 0.755337 | 892.0   |
| SR           | 0.746094 | 0.745673  | 0.746534 | 681.0   |
| macro avg    | 0.736523 | 0.738761  | 0.734520 | 2077.0  |
| micro avg    | 0.744530 | 0.744530  | 0.744530 | 2077.0  |
| weighted avg | 0.744453 | 0.744481  | 0.744530 | 2077.0  |

The result of Model Number:Dataset Number:Featuregroup Number:Rescale of 90 : 1 : 3 : 1

|      | f1-score | precision | recall   | support |
|------|----------|-----------|----------|---------|
| AFIB | 0.719683 | 0.713918  | 0.725625 | 875.0   |

GSVT 0.739558 0.740820 0.738387 691.0  
SB 0.784048 0.781947 0.786168 1553.0  
SR 0.762626 0.771504 0.753967 907.0  
macro avg 0.751479 0.752047 0.751037 4026.0  
micro avg 0.757554 0.757554 0.757554 4026.0  
weighted avg 0.757597 0.757750 0.757554 4026.0  
The result of Model Number:Dataset Number:Featuregroup Number:Rescale of 90 : 1 : 4 :  
0

f1-score precision recall support  
AFIB 0.696104 0.705322 0.687229 204.0  
GSVT 0.717111 0.714523 0.719734 300.0  
SB 0.726043 0.723783 0.728320 892.0  
SR 0.718132 0.719515 0.716774 681.0  
macro avg 0.714347 0.715786 0.713014 2077.0  
micro avg 0.719258 0.719258 0.719258 2077.0  
weighted avg 0.719218 0.719233 0.719258 2077.0  
The result of Model Number:Dataset Number:Featuregroup Number:Rescale of 90 : 1 : 4 :  
1

f1-score precision recall support  
AFIB 0.802108 0.783414 0.821846 875.0  
GSVT 0.769995 0.778459 0.761766 691.0  
SB 0.810297 0.757973 0.870400 1553.0  
SR 0.648516 0.778743 0.555951 907.0  
macro avg 0.757729 0.774647 0.752491 4026.0  
micro avg 0.770361 0.770361 0.770361 4026.0  
weighted avg 0.765153 0.771698 0.770361 4026.0  
The result of Model Number:Dataset Number:Featuregroup Number:Rescale of 90 : 1 : 5 :  
0

f1-score precision recall support  
AFIB 0.817443 0.794771 0.844020 875.0  
GSVT 0.828114 0.862996 0.801039 691.0  
SB 0.909712 0.909253 0.910184 1553.0  
SR 0.886890 0.892440 0.881415 907.0  
macro avg 0.860540 0.864865 0.859164 4026.0  
micro avg 0.870590 0.870590 0.870590 4026.0  
weighted avg 0.870512 0.872645 0.870590 4026.0  
The result of Model Number:Dataset Number:Featuregroup Number:Rescale of 90 : 1 : 5 :  
1

f1-score precision recall support  
AFIB 0.836132 0.835720 0.836608 875.0  
GSVT 0.854283 0.850079 0.858581 691.0  
SB 0.893595 0.887753 0.899520 1553.0  
SR 0.868157 0.882298 0.854485 907.0  
macro avg 0.863041 0.863963 0.862298 4026.0

micro avg 0.868675 0.868675 0.868675 4026.0  
weighted avg 0.868628 0.868749 0.868675 4026.0  
The result of Model Number:Dataset Number:Featuregroup Number:Rescale of 90 : 1 : 6 :  
0

|              | f1-score | precision | recall   | support |
|--------------|----------|-----------|----------|---------|
| AFIB         | 0.818840 | 0.796129  | 0.845463 | 875.0   |
| GSVT         | 0.829530 | 0.864471  | 0.802408 | 691.0   |
| SB           | 0.911268 | 0.910807  | 0.911740 | 1553.0  |
| SR           | 0.888406 | 0.893966  | 0.882922 | 907.0   |
| macro avg    | 0.862011 | 0.866343  | 0.860633 | 4026.0  |
| micro avg    | 0.872078 | 0.872078  | 0.872078 | 4026.0  |
| weighted avg | 0.872001 | 0.874136  | 0.872078 | 4026.0  |

The result of Model Number:Dataset Number:Featuregroup Number:Rescale of 90 : 1 : 6 :  
1

|              | f1-score | precision | recall   | support |
|--------------|----------|-----------|----------|---------|
| AFIB         | 0.731789 | 0.732612  | 0.731101 | 204.0   |
| GSVT         | 0.748590 | 0.746919  | 0.750326 | 300.0   |
| SB           | 0.764457 | 0.763437  | 0.765484 | 892.0   |
| SR           | 0.758732 | 0.760643  | 0.756840 | 681.0   |
| macro avg    | 0.750892 | 0.750903  | 0.750938 | 2077.0  |
| micro avg    | 0.757083 | 0.757083  | 0.757083 | 2077.0  |
| weighted avg | 0.757079 | 0.757107  | 0.757083 | 2077.0  |

The result of Model Number:Dataset Number:Featuregroup Number:Rescale of 90 : 1 : 7 :  
0

|              | f1-score | precision | recall   | support |
|--------------|----------|-----------|----------|---------|
| AFIB         | 0.745051 | 0.723585  | 0.817464 | 875.0   |
| GSVT         | 0.821146 | 0.818523  | 0.823891 | 691.0   |
| SB           | 0.693168 | 0.682953  | 0.703750 | 1553.0  |
| SR           | 0.829986 | 0.846186  | 0.814499 | 907.0   |
| macro avg    | 0.772338 | 0.767812  | 0.789901 | 4026.0  |
| micro avg    | 0.774035 | 0.774035  | 0.774035 | 4026.0  |
| weighted avg | 0.757233 | 0.751826  | 0.774035 | 4026.0  |

The result of Model Number:Dataset Number:Featuregroup Number:Rescale of 90 : 1 : 7 :  
1

|              | f1-score | precision | recall   | support |
|--------------|----------|-----------|----------|---------|
| AFIB         | 0.689721 | 0.765449  | 0.627793 | 204.0   |
| GSVT         | 0.805342 | 0.795274  | 0.815827 | 300.0   |
| SB           | 0.856845 | 0.852472  | 0.861263 | 892.0   |
| SR           | 0.836772 | 0.825073  | 0.848811 | 681.0   |
| macro avg    | 0.797170 | 0.809567  | 0.788423 | 2077.0  |
| micro avg    | 0.827686 | 0.827686  | 0.827686 | 2077.0  |
| weighted avg | 0.826410 | 0.826680  | 0.827686 | 2077.0  |

The result of Model Number:Dataset Number:Featuregroup Number:Rescale of 90 : 1 : 8 :  
0

f1-score precision recall support  
AFIB 0.886594 0.909805 0.864942 204.0  
GSVT 0.834224 0.858469 0.811764 300.0  
SB 0.880284 0.849292 0.913641 892.0  
SR 0.797870 0.823854 0.773636 681.0  
macro avg 0.849743 0.860355 0.840996 2077.0  
micro avg 0.848239 0.848239 0.848239 2077.0  
weighted avg 0.847230 0.848220 0.848239 2077.0  
The result of Model Number:Dataset Number:Featuregroup Number:Rescale of 90 : 1 : 8 :  
1

f1-score precision recall support  
AFIB 0.931502 0.942393 0.921039 204.0  
GSVT 0.957127 0.952726 0.961595 300.0  
SB 0.970679 0.967660 0.973723 892.0  
SR 0.962319 0.965047 0.959648 681.0  
macro avg 0.955407 0.956957 0.954001 2077.0  
micro avg 0.962182 0.962182 0.962182 2077.0  
weighted avg 0.962132 0.962165 0.962182 2077.0  
The result of Model Number:Dataset Number:Featuregroup Number:Rescale of 90 : 1 : 9 :  
0

f1-score precision recall support  
AFIB 0.822624 0.865123 0.784349 204.0  
GSVT 0.862591 0.854160 0.871210 300.0  
SB 0.877801 0.870739 0.884983 892.0  
SR 0.866958 0.868013 0.865941 681.0  
macro avg 0.857494 0.864509 0.851621 2077.0  
micro avg 0.866866 0.866866 0.866866 2077.0  
weighted avg 0.866629 0.866899 0.866866 2077.0  
The result of Model Number:Dataset Number:Featuregroup Number:Rescale of 90 : 1 : 9 :  
1

f1-score precision recall support  
AFIB 0.902749 0.910278 0.895654 204.0  
GSVT 0.926597 0.922330 0.930923 300.0  
SB 0.940570 0.937229 0.943942 892.0  
SR 0.931883 0.936057 0.927795 681.0  
macro avg 0.925450 0.926474 0.924578 2077.0  
micro avg 0.932024 0.932024 0.932024 2077.0  
weighted avg 0.931989 0.932046 0.932024 2077.0  
The result of Model Number:Dataset Number:Featuregroup Number:Rescale of 90 : 1 :  
10 : 0

f1-score precision recall support  
AFIB 0.862877 0.869084 0.856759 875.0  
GSVT 0.861502 0.856343 0.866736 691.0  
SB 0.908758 0.898690 0.919057 1553.0

SR 0.872024 0.887581 0.857031 907.0  
macro avg 0.876290 0.877925 0.874896 4026.0  
micro avg 0.882564 0.882564 0.882564 4026.0  
weighted avg 0.882400 0.882485 0.882564 4026.0  
The result of Model Number:Dataset Number:Featuregroup Number:Rescale of 90 : 1 :  
10 : 1

f1-score precision recall support  
AFIB 0.833832 0.860084 0.809339 204.0  
GSVT 0.792185 0.809106 0.776089 300.0  
SB 0.817948 0.789326 0.848754 892.0  
SR 0.746993 0.772240 0.723399 681.0  
macro avg 0.797740 0.807689 0.789395 2077.0  
micro avg 0.793286 0.793286 0.793286 2077.0  
weighted avg 0.792523 0.793531 0.793286 2077.0

The result of Model Number:Dataset Number:Featuregroup Number:Rescale of 91 : 0 : 0 :  
0

f1-score precision recall support  
AFIB 0.839192 0.843781 0.834681 875.0  
GSVT 0.835193 0.828151 0.842440 691.0  
SB 0.878414 0.870095 0.886897 1553.0  
SR 0.845722 0.861498 0.830525 907.0  
macro avg 0.849630 0.850882 0.848636 4026.0  
micro avg 0.855218 0.855218 0.855218 4026.0  
weighted avg 0.855107 0.855240 0.855218 4026.0

The result of Model Number:Dataset Number:Featuregroup Number:Rescale of 91 : 0 : 0 :  
1

f1-score precision recall support  
AFIB 0.718843 0.746216 0.693564 204.0  
GSVT 0.741745 0.734269 0.749408 300.0  
SB 0.756592 0.752825 0.760407 892.0  
SR 0.747453 0.747923 0.747008 681.0  
macro avg 0.741158 0.745309 0.737596 2077.0  
micro avg 0.747860 0.747860 0.747860 2077.0  
weighted avg 0.747743 0.747889 0.747860 2077.0

The result of Model Number:Dataset Number:Featuregroup Number:Rescale of 91 : 0 : 1 :  
0

f1-score precision recall support  
AFIB 0.697385 0.696033 0.698833 875.0  
GSVT 0.710480 0.698049 0.723430 691.0  
SB 0.761125 0.750326 0.772248 1553.0  
SR 0.720986 0.753127 0.691508 907.0  
macro avg 0.722494 0.724384 0.721505 4026.0  
micro avg 0.729724 0.729724 0.729724 4026.0  
weighted avg 0.729537 0.730185 0.729724 4026.0

The result of Model Number:Dataset Number:Featuregroup Number:Rescale of 91 : 0 : 1 : 1

|              | f1-score | precision | recall   | support |
|--------------|----------|-----------|----------|---------|
| AFIB         | 0.675340 | 0.707674  | 0.645992 | 204.0   |
| GSVT         | 0.711315 | 0.703701  | 0.719123 | 300.0   |
| SB           | 0.726424 | 0.722411  | 0.730492 | 892.0   |
| SR           | 0.718218 | 0.717596  | 0.718854 | 681.0   |
| macro avg    | 0.707825 | 0.712845  | 0.703615 | 2077.0  |
| micro avg    | 0.716735 | 0.716735  | 0.716735 | 2077.0  |
| weighted avg | 0.716534 | 0.716682  | 0.716735 | 2077.0  |

The result of Model Number:Dataset Number:Featuregroup Number:Rescale of 91 : 0 : 2 : 0

|              | f1-score | precision | recall   | support |
|--------------|----------|-----------|----------|---------|
| AFIB         | 0.663065 | 0.685085  | 0.642669 | 204.0   |
| GSVT         | 0.688229 | 0.682707  | 0.693944 | 300.0   |
| SB           | 0.703434 | 0.700544  | 0.706351 | 892.0   |
| SR           | 0.696865 | 0.696763  | 0.696967 | 681.0   |
| macro avg    | 0.687898 | 0.691275  | 0.684983 | 2077.0  |
| micro avg    | 0.695227 | 0.695227  | 0.695227 | 2077.0  |
| weighted avg | 0.695119 | 0.695210  | 0.695227 | 2077.0  |

The result of Model Number:Dataset Number:Featuregroup Number:Rescale of 91 : 0 : 2 : 1

|              | f1-score | precision | recall   | support |
|--------------|----------|-----------|----------|---------|
| AFIB         | 0.864102 | 0.866248  | 0.862025 | 875.0   |
| GSVT         | 0.878983 | 0.881624  | 0.876469 | 691.0   |
| SB           | 0.932443 | 0.926113  | 0.938865 | 1553.0  |
| SR           | 0.914699 | 0.921489  | 0.908043 | 907.0   |
| macro avg    | 0.897557 | 0.898869  | 0.896350 | 4026.0  |
| micro avg    | 0.904512 | 0.904512  | 0.904512 | 4026.0  |
| weighted avg | 0.904417 | 0.904425  | 0.904512 | 4026.0  |

The result of Model Number:Dataset Number:Featuregroup Number:Rescale of 91 : 0 : 3 : 0

|              | f1-score | precision | recall   | support |
|--------------|----------|-----------|----------|---------|
| AFIB         | 0.703581 | 0.685098  | 0.747627 | 875.0   |
| GSVT         | 0.676839 | 0.640636  | 0.771582 | 691.0   |
| SB           | 0.641340 | 0.637286  | 0.645464 | 1553.0  |
| SR           | 0.622960 | 0.633693  | 0.612758 | 907.0   |
| macro avg    | 0.661180 | 0.649178  | 0.694358 | 4026.0  |
| micro avg    | 0.681946 | 0.681946  | 0.681946 | 4026.0  |
| weighted avg | 0.656819 | 0.647443  | 0.681946 | 4026.0  |

The result of Model Number:Dataset Number:Featuregroup Number:Rescale of 91 : 0 : 3 : 1

|      | f1-score | precision | recall   | support |
|------|----------|-----------|----------|---------|
| AFIB | 0.747317 | 0.735596  | 0.759498 | 875.0   |



GSVT 0.720089 0.740732 0.700648 691.0  
SB 0.756694 0.718336 0.799422 1553.0  
SR 0.614809 0.684158 0.558322 907.0  
macro avg 0.709727 0.719706 0.704473 4026.0  
micro avg 0.719476 0.719476 0.719476 4026.0  
weighted avg 0.716409 0.718232 0.719476 4026.0  
The result of Model Number:Dataset Number:Featuregroup Number:Rescale of 91 : 0 : 4 :  
0

f1-score precision recall support

AFIB 0.728268 0.734782 0.721958 875.0  
GSVT 0.742177 0.728064 0.756989 691.0  
SB 0.787759 0.780934 0.794706 1553.0  
SR 0.755403 0.772772 0.738832 907.0  
macro avg 0.753401 0.754138 0.753121 4026.0  
micro avg 0.759834 0.759834 0.759834 4026.0  
weighted avg 0.759716 0.759991 0.759834 4026.0  
The result of Model Number:Dataset Number:Featuregroup Number:Rescale of 91 : 0 : 4 :  
1

f1-score precision recall support

AFIB 0.827250 0.836055 0.819086 204.0  
GSVT 0.851561 0.845887 0.857561 300.0  
SB 0.869556 0.868779 0.870336 892.0  
SR 0.862224 0.863375 0.861083 681.0  
macro avg 0.852648 0.853524 0.852016 2077.0  
micro avg 0.860423 0.860423 0.860423 2077.0  
weighted avg 0.860398 0.860487 0.860423 2077.0  
The result of Model Number:Dataset Number:Featuregroup Number:Rescale of 91 : 0 : 5 :  
0

f1-score precision recall support

AFIB 0.687194 0.756989 0.629843 204.0  
GSVT 0.634620 0.678504 0.596364 300.0  
SB 0.690913 0.645571 0.743116 892.0  
SR 0.597996 0.629431 0.569717 681.0  
macro avg 0.652681 0.677624 0.634760 2077.0  
micro avg 0.653940 0.653940 0.653940 2077.0  
weighted avg 0.651952 0.655979 0.653940 2077.0  
The result of Model Number:Dataset Number:Featuregroup Number:Rescale of 91 : 0 : 5 :  
1

f1-score precision recall support

AFIB 0.607780 0.565190 0.713722 875.0  
GSVT 0.521250 0.486659 0.589586 691.0  
SB 0.622860 0.617605 0.628219 1553.0  
SR 0.600347 0.614898 0.586677 907.0  
macro avg 0.588059 0.571088 0.629551 4026.0

micro avg 0.630813 0.630813 0.630813 4026.0  
weighted avg 0.597071 0.583129 0.630813 4026.0  
The result of Model Number:Dataset Number:Featuregroup Number:Rescale of 91 : 0 : 6 :  
0

|              | f1-score | precision | recall   | support |
|--------------|----------|-----------|----------|---------|
| AFIB         | 0.724024 | 0.797071  | 0.663665 | 204.0   |
| GSVT         | 0.853836 | 0.842050  | 0.866092 | 300.0   |
| SB           | 0.906608 | 0.903583  | 0.909657 | 892.0   |
| SR           | 0.883391 | 0.871169  | 0.895972 | 681.0   |
| macro avg    | 0.841965 | 0.853468  | 0.833847 | 2077.0  |
| micro avg    | 0.874716 | 0.874716  | 0.874716 | 2077.0  |
| weighted avg | 0.873440 | 0.873606  | 0.874716 | 2077.0  |

The result of Model Number:Dataset Number:Featuregroup Number:Rescale of 91 : 0 : 6 :  
1

|              | f1-score | precision | recall   | support |
|--------------|----------|-----------|----------|---------|
| AFIB         | 0.683884 | 0.691484  | 0.676801 | 204.0   |
| GSVT         | 0.705068 | 0.701054  | 0.709333 | 300.0   |
| SB           | 0.719094 | 0.718131  | 0.720062 | 892.0   |
| SR           | 0.712977 | 0.713932  | 0.712034 | 681.0   |
| macro avg    | 0.705256 | 0.706150  | 0.704557 | 2077.0  |
| micro avg    | 0.711631 | 0.711631  | 0.711631 | 2077.0  |
| weighted avg | 0.711604 | 0.711670  | 0.711631 | 2077.0  |

The result of Model Number:Dataset Number:Featuregroup Number:Rescale of 91 : 0 : 7 :  
0

|              | f1-score | precision | recall   | support |
|--------------|----------|-----------|----------|---------|
| AFIB         | 0.890440 | 0.892483  | 0.888503 | 875.0   |
| GSVT         | 0.893544 | 0.891025  | 0.896108 | 691.0   |
| SB           | 0.937761 | 0.929995  | 0.945670 | 1553.0  |
| SR           | 0.909628 | 0.923279  | 0.896413 | 907.0   |
| macro avg    | 0.907843 | 0.909196  | 0.906673 | 4026.0  |
| micro avg    | 0.913642 | 0.913642  | 0.913642 | 4026.0  |
| weighted avg | 0.913549 | 0.913641  | 0.913642 | 4026.0  |

The result of Model Number:Dataset Number:Featuregroup Number:Rescale of 91 : 0 : 7 :  
1

|              | f1-score | precision | recall   | support |
|--------------|----------|-----------|----------|---------|
| AFIB         | 0.799233 | 0.803425  | 0.795132 | 875.0   |
| GSVT         | 0.815945 | 0.814479  | 0.817474 | 691.0   |
| SB           | 0.885976 | 0.879182  | 0.892879 | 1553.0  |
| SR           | 0.854718 | 0.863273  | 0.846336 | 907.0   |
| macro avg    | 0.838968 | 0.840090  | 0.837955 | 4026.0  |
| micro avg    | 0.848207 | 0.848207  | 0.848207 | 4026.0  |
| weighted avg | 0.848062 | 0.848028  | 0.848207 | 4026.0  |

The result of Model Number:Dataset Number:Featuregroup Number:Rescale of 91 : 0 : 8 :  
0

f1-score precision recall support  
AFIB 0.821546 0.838608 0.805352 875.0  
GSVT 0.801170 0.773344 0.866569 691.0  
SB 0.944305 0.940046 0.948617 1553.0  
SR 0.717905 0.706314 0.729947 907.0  
macro avg 0.821231 0.814578 0.837621 4026.0  
micro avg 0.854135 0.854135 0.854135 4026.0  
weighted avg 0.842053 0.836732 0.854135 4026.0  
The result of Model Number:Dataset Number:Featuregroup Number:Rescale of 91 : 0 : 8 :  
1

f1-score precision recall support  
AFIB 0.684767 0.691083 0.678731 204.0  
GSVT 0.709801 0.709827 0.709795 300.0  
SB 0.724667 0.723379 0.725965 892.0  
SR 0.716976 0.716784 0.717185 681.0  
macro avg 0.709053 0.710268 0.707919 2077.0  
micro avg 0.716111 0.716111 0.716111 2077.0  
weighted avg 0.716079 0.716087 0.716111 2077.0  
The result of Model Number:Dataset Number:Featuregroup Number:Rescale of 91 : 0 : 9 :  
0

f1-score precision recall support  
AFIB 0.912996 0.922727 0.903616 204.0  
GSVT 0.929786 0.924685 0.935046 300.0  
SB 0.951248 0.949663 0.952845 892.0  
SR 0.943319 0.944855 0.941799 681.0  
macro avg 0.934337 0.935483 0.933327 2077.0  
micro avg 0.941817 0.941817 0.941817 2077.0  
weighted avg 0.941791 0.941833 0.941817 2077.0  
The result of Model Number:Dataset Number:Featuregroup Number:Rescale of 91 : 0 : 9 :  
1

f1-score precision recall support  
AFIB 0.720200 0.799275 0.655536 204.0  
GSVT 0.840931 0.830418 0.851879 300.0  
SB 0.894709 0.890144 0.899322 892.0  
SR 0.873749 0.861534 0.886320 681.0  
macro avg 0.832397 0.845342 0.823264 2077.0  
micro avg 0.864262 0.864262 0.864262 2077.0  
weighted avg 0.862929 0.863211 0.864262 2077.0  
The result of Model Number:Dataset Number:Featuregroup Number:Rescale of 91 : 0 :  
10 : 0

f1-score precision recall support  
AFIB 0.719449 0.721236 0.717719 875.0  
GSVT 0.731839 0.734037 0.729746 691.0  
SB 0.776349 0.771079 0.781696 1553.0

SR 0.761576 0.767229 0.756034 907.0  
macro avg 0.747303 0.748396 0.746299 4026.0  
micro avg 0.753094 0.753094 0.753094 4026.0  
weighted avg 0.753015 0.753022 0.753094 4026.0  
The result of Model Number:Dataset Number:Featuregroup Number:Rescale of 91 : 0 :

10 : 1

f1-score precision recall support

AFIB 0.885403 0.894456 0.876606 875.0  
GSVT 0.885137 0.871463 0.899351 691.0  
SB 0.933701 0.928126 0.939352 1553.0  
SR 0.908988 0.921154 0.897166 907.0  
macro avg 0.903307 0.903800 0.903119 4026.0  
micro avg 0.909346 0.909346 0.909346 4026.0  
weighted avg 0.909302 0.909512 0.909346 4026.0

The result of Model Number:Dataset Number:Featuregroup Number:Rescale of 91 : 1 : 0 :  
0

f1-score precision recall support

AFIB 0.826439 0.843604 0.810149 875.0  
GSVT 0.805942 0.777950 0.871731 691.0  
SB 0.949929 0.945646 0.954268 1553.0  
SR 0.722181 0.710522 0.734295 907.0  
macro avg 0.826123 0.819430 0.842611 4026.0  
micro avg 0.859222 0.859222 0.859222 4026.0  
weighted avg 0.847069 0.841716 0.859222 4026.0

The result of Model Number:Dataset Number:Featuregroup Number:Rescale of 91 : 1 : 0 :  
1

f1-score precision recall support

AFIB 0.763228 0.762000 0.764772 875.0  
GSVT 0.781024 0.776952 0.785183 691.0  
SB 0.816601 0.809682 0.823645 1553.0  
SR 0.785428 0.802889 0.768975 907.0  
macro avg 0.786570 0.787881 0.785643 4026.0  
micro avg 0.791932 0.791932 0.791932 4026.0  
weighted avg 0.791872 0.792171 0.791932 4026.0

The result of Model Number:Dataset Number:Featuregroup Number:Rescale of 91 : 1 : 1 :  
0

f1-score precision recall support

AFIB 0.782640 0.823074 0.746226 204.0  
GSVT 0.820665 0.812643 0.828865 300.0  
SB 0.835135 0.828417 0.841968 892.0  
SR 0.824820 0.825824 0.823852 681.0  
macro avg 0.815815 0.822489 0.810228 2077.0  
micro avg 0.824732 0.824732 0.824732 2077.0  
weighted avg 0.824507 0.824763 0.824732 2077.0

The result of Model Number:Dataset Number:Featuregroup Number:Rescale of 91 : 1 : 1 : 1

|              | f1-score | precision | recall   | support |
|--------------|----------|-----------|----------|---------|
| AFIB         | 0.878632 | 0.897137  | 0.861013 | 204.0   |
| GSVT         | 0.905949 | 0.897673  | 0.914401 | 300.0   |
| SB           | 0.920745 | 0.918693  | 0.922810 | 892.0   |
| SR           | 0.909803 | 0.910754  | 0.908864 | 681.0   |
| macro avg    | 0.903782 | 0.906064  | 0.901772 | 2077.0  |
| micro avg    | 0.910953 | 0.910953  | 0.910953 | 2077.0  |
| weighted avg | 0.910884 | 0.910936  | 0.910953 | 2077.0  |

The result of Model Number:Dataset Number:Featuregroup Number:Rescale of 91 : 1 : 2 : 0

|              | f1-score | precision | recall   | support |
|--------------|----------|-----------|----------|---------|
| AFIB         | 0.895164 | 0.929251  | 0.863684 | 204.0   |
| GSVT         | 0.923683 | 0.914374  | 0.933226 | 300.0   |
| SB           | 0.942172 | 0.937481  | 0.946922 | 892.0   |
| SR           | 0.930791 | 0.931377  | 0.930237 | 681.0   |
| macro avg    | 0.922952 | 0.928121  | 0.918517 | 2077.0  |
| micro avg    | 0.931298 | 0.931298  | 0.931298 | 2077.0  |
| weighted avg | 0.931153 | 0.931334  | 0.931298 | 2077.0  |

The result of Model Number:Dataset Number:Featuregroup Number:Rescale of 91 : 1 : 2 : 1

|              | f1-score | precision | recall   | support |
|--------------|----------|-----------|----------|---------|
| AFIB         | 0.836016 | 0.853552  | 0.819209 | 204.0   |
| GSVT         | 0.855410 | 0.850348  | 0.860540 | 300.0   |
| SB           | 0.876264 | 0.874212  | 0.878326 | 892.0   |
| SR           | 0.868862 | 0.868613  | 0.869120 | 681.0   |
| macro avg    | 0.859138 | 0.861681  | 0.856799 | 2077.0  |
| micro avg    | 0.866932 | 0.866932  | 0.866932 | 2077.0  |
| weighted avg | 0.866872 | 0.866900  | 0.866932 | 2077.0  |

The result of Model Number:Dataset Number:Featuregroup Number:Rescale of 91 : 1 : 3 : 0

|              | f1-score | precision | recall   | support |
|--------------|----------|-----------|----------|---------|
| AFIB         | 0.766916 | 0.845745  | 0.702000 | 204.0   |
| GSVT         | 0.912608 | 0.900274  | 0.925374 | 300.0   |
| SB           | 0.971862 | 0.967975  | 0.975784 | 892.0   |
| SR           | 0.945484 | 0.932703  | 0.958661 | 681.0   |
| macro avg    | 0.899217 | 0.911675  | 0.890455 | 2077.0  |
| micro avg    | 0.935998 | 0.935998  | 0.935998 | 2077.0  |
| weighted avg | 0.934525 | 0.934627  | 0.935998 | 2077.0  |

The result of Model Number:Dataset Number:Featuregroup Number:Rescale of 91 : 1 : 3 : 1

|      | f1-score | precision | recall   | support |
|------|----------|-----------|----------|---------|
| AFIB | 0.584300 | 0.574945  | 0.657456 | 204.0   |

GSVT 0.684061 0.676123 0.692436 300.0  
SB 0.706966 0.704296 0.709660 892.0  
SR 0.554698 0.557566 0.551954 681.0  
macro avg 0.632506 0.628233 0.652876 2077.0  
micro avg 0.650337 0.650337 0.650337 2077.0  
weighted avg 0.641684 0.639413 0.650337 2077.0  
The result of Model Number:Dataset Number:Featuregroup Number:Rescale of 91 : 1 : 4 :  
0

f1-score precision recall support  
AFIB 0.841969 0.882787 0.804852 204.0  
GSVT 0.877035 0.865575 0.888980 300.0  
SB 0.900656 0.893807 0.907624 892.0  
SR 0.875579 0.878195 0.873017 681.0  
macro avg 0.873810 0.880091 0.868618 2077.0  
micro avg 0.883490 0.883490 0.883490 2077.0  
weighted avg 0.883258 0.883528 0.883490 2077.0  
The result of Model Number:Dataset Number:Featuregroup Number:Rescale of 91 : 1 : 4 :  
1

f1-score precision recall support  
AFIB 0.801979 0.784842 0.819929 875.0  
GSVT 0.830500 0.843200 0.818252 691.0  
SB 0.885312 0.885429 0.885198 1553.0  
SR 0.862504 0.871436 0.853756 907.0  
macro avg 0.845074 0.846227 0.844284 4026.0  
micro avg 0.852439 0.852439 0.852439 4026.0  
weighted avg 0.852655 0.853167 0.852439 4026.0  
The result of Model Number:Dataset Number:Featuregroup Number:Rescale of 91 : 1 : 5 :  
0

f1-score precision recall support  
AFIB 0.786888 0.788946 0.784995 204.0  
GSVT 0.804642 0.801527 0.807849 300.0  
SB 0.822688 0.821590 0.823793 892.0  
SR 0.816099 0.818392 0.813822 681.0  
macro avg 0.807579 0.807614 0.807615 2077.0  
micro avg 0.814410 0.814410 0.814410 2077.0  
weighted avg 0.814405 0.814437 0.814410 2077.0  
The result of Model Number:Dataset Number:Featuregroup Number:Rescale of 91 : 1 : 5 :  
1

f1-score precision recall support  
AFIB 0.887820 0.886001 0.890289 875.0  
GSVT 0.899930 0.890484 0.909742 691.0  
SB 0.949124 0.936309 0.962481 1553.0  
SR 0.902940 0.937374 0.871152 907.0  
macro avg 0.909953 0.912542 0.908416 4026.0

micro avg 0.917164 0.917164 0.917164 4026.0  
weighted avg 0.916952 0.917750 0.917164 4026.0  
The result of Model Number:Dataset Number:Featuregroup Number:Rescale of 91 : 1 : 6 :  
0

|              | f1-score | precision | recall   | support |
|--------------|----------|-----------|----------|---------|
| AFIB         | 0.673311 | 0.647570  | 0.715664 | 875.0   |
| GSVT         | 0.697664 | 0.673586  | 0.730323 | 691.0   |
| SB           | 0.777327 | 0.763606  | 0.792404 | 1553.0  |
| SR           | 0.658378 | 0.791662  | 0.568421 | 907.0   |
| macro avg    | 0.701670 | 0.719106  | 0.701703 | 4026.0  |
| micro avg    | 0.714610 | 0.714610  | 0.714610 | 4026.0  |
| weighted avg | 0.714250 | 0.729257  | 0.714610 | 4026.0  |

The result of Model Number:Dataset Number:Featuregroup Number:Rescale of 91 : 1 : 6 :  
1

|              | f1-score | precision | recall   | support |
|--------------|----------|-----------|----------|---------|
| AFIB         | 0.708205 | 0.694967  | 0.722034 | 875.0   |
| GSVT         | 0.733013 | 0.744585  | 0.721886 | 691.0   |
| SB           | 0.779528 | 0.778135  | 0.780933 | 1553.0  |
| SR           | 0.759714 | 0.767762  | 0.751837 | 907.0   |
| macro avg    | 0.745115 | 0.746362  | 0.744172 | 4026.0  |
| micro avg    | 0.751442 | 0.751442  | 0.751442 | 4026.0  |
| weighted avg | 0.751579 | 0.751964  | 0.751442 | 4026.0  |

The result of Model Number:Dataset Number:Featuregroup Number:Rescale of 91 : 1 : 7 :  
0

|              | f1-score | precision | recall   | support |
|--------------|----------|-----------|----------|---------|
| AFIB         | 0.798566 | 0.820580  | 0.777862 | 204.0   |
| GSVT         | 0.819818 | 0.804642  | 0.835656 | 300.0   |
| SB           | 0.833114 | 0.825326  | 0.841053 | 892.0   |
| SR           | 0.812173 | 0.823207  | 0.801445 | 681.0   |
| macro avg    | 0.815918 | 0.818439  | 0.814004 | 2077.0  |
| micro avg    | 0.821080 | 0.821080  | 0.821080 | 2077.0  |
| weighted avg | 0.820934 | 0.821177  | 0.821080 | 2077.0  |

The result of Model Number:Dataset Number:Featuregroup Number:Rescale of 91 : 1 : 7 :  
1

|              | f1-score | precision | recall   | support |
|--------------|----------|-----------|----------|---------|
| AFIB         | 0.775090 | 0.774842  | 0.775378 | 875.0   |
| GSVT         | 0.786641 | 0.776530  | 0.797112 | 691.0   |
| SB           | 0.832062 | 0.830252  | 0.833883 | 1553.0  |
| SR           | 0.809040 | 0.820900  | 0.797532 | 907.0   |
| macro avg    | 0.800708 | 0.800631  | 0.800976 | 4026.0  |
| micro avg    | 0.806667 | 0.806667  | 0.806667 | 4026.0  |
| weighted avg | 0.806698 | 0.806882  | 0.806667 | 4026.0  |

The result of Model Number:Dataset Number:Featuregroup Number:Rescale of 91 : 1 : 8 :  
0

f1-score precision recall support  
AFIB 0.803891 0.810596 0.797573 204.0  
GSVT 0.825128 0.821328 0.828980 300.0  
SB 0.837571 0.834596 0.840573 892.0  
SR 0.829836 0.833552 0.826195 681.0  
macro avg 0.824107 0.825018 0.823330 2077.0  
micro avg 0.829961 0.829961 0.829961 2077.0  
weighted avg 0.829930 0.829980 0.829961 2077.0  
The result of Model Number:Dataset Number:Featuregroup Number:Rescale of 91 : 1 : 8 :  
1

f1-score precision recall support  
AFIB 0.842753 0.844478 0.841127 204.0  
GSVT 0.861289 0.857942 0.864724 300.0  
SB 0.880410 0.879235 0.881592 892.0  
SR 0.873943 0.876526 0.871377 681.0  
macro avg 0.864599 0.864545 0.864705 2077.0  
micro avg 0.871832 0.871832 0.871832 2077.0  
weighted avg 0.871829 0.871857 0.871832 2077.0  
The result of Model Number:Dataset Number:Featuregroup Number:Rescale of 91 : 1 : 9 :  
0

f1-score precision recall support  
AFIB 0.657785 0.690651 0.628236 204.0  
GSVT 0.677616 0.665058 0.690893 300.0  
SB 0.693123 0.686136 0.700268 892.0  
SR 0.673900 0.679920 0.668047 681.0  
macro avg 0.675606 0.680441 0.671861 2077.0  
micro avg 0.681275 0.681275 0.681275 2077.0  
weighted avg 0.681110 0.681497 0.681275 2077.0  
The result of Model Number:Dataset Number:Featuregroup Number:Rescale of 91 : 1 : 9 :  
1

f1-score precision recall support  
AFIB 0.768426 0.767723 0.769223 875.0  
GSVT 0.784177 0.782656 0.785786 691.0  
SB 0.832114 0.830260 0.833988 1553.0  
SR 0.809402 0.814682 0.804219 907.0  
macro avg 0.798530 0.798830 0.798304 4026.0  
micro avg 0.804933 0.804933 0.804933 4026.0  
weighted avg 0.804928 0.804988 0.804933 4026.0  
The result of Model Number:Dataset Number:Featuregroup Number:Rescale of 91 : 1 :  
10 : 0

f1-score precision recall support  
AFIB 0.821509 0.904945 0.752948 204.0  
GSVT 0.758659 0.811120 0.712926 300.0  
SB 0.825954 0.771750 0.888361 892.0



SR 0.714877 0.752455 0.681070 681.0  
macro avg 0.780250 0.810067 0.758826 2077.0  
micro avg 0.781755 0.781755 0.781755 2077.0  
weighted avg 0.779378 0.784192 0.781755 2077.0  
The result of Model Number:Dataset Number:Featuregroup Number:Rescale of 91 : 1 :  
10 : 1

f1-score precision recall support  
AFIB 0.787004 0.830140 0.748652 204.0  
GSVT 0.749395 0.775669 0.724935 300.0  
SB 0.770826 0.741096 0.803054 892.0  
SR 0.686056 0.704669 0.668440 681.0  
macro avg 0.748320 0.762893 0.736270 2077.0  
micro avg 0.742290 0.742290 0.742290 2077.0  
weighted avg 0.741525 0.742892 0.742290 2077.0

The result of Model Number:Dataset Number:Featuregroup Number:Rescale of 92 : 0 : 0 :  
0

f1-score precision recall support  
AFIB 0.732529 0.806928 0.671394 204.0  
GSVT 0.676486 0.723266 0.635707 300.0  
SB 0.736493 0.688159 0.792140 892.0  
SR 0.637446 0.670954 0.607301 681.0  
macro avg 0.695739 0.722327 0.676635 2077.0  
micro avg 0.697081 0.697081 0.697081 2077.0  
weighted avg 0.694961 0.699254 0.697081 2077.0

The result of Model Number:Dataset Number:Featuregroup Number:Rescale of 92 : 0 : 0 :  
1

f1-score precision recall support  
AFIB 0.766896 0.800110 0.736547 204.0  
GSVT 0.716915 0.723605 0.710707 300.0  
SB 0.743134 0.706598 0.783707 892.0  
SR 0.662334 0.704132 0.625434 681.0  
macro avg 0.722320 0.733612 0.714099 2077.0  
micro avg 0.716637 0.716637 0.716637 2077.0  
weighted avg 0.715188 0.717431 0.716637 2077.0

The result of Model Number:Dataset Number:Featuregroup Number:Rescale of 92 : 0 : 1 :  
0

f1-score precision recall support  
AFIB 0.679347 0.680719 0.677996 204.0  
GSVT 0.698247 0.696171 0.700339 300.0  
SB 0.709817 0.709184 0.710453 892.0  
SR 0.703716 0.705067 0.702379 681.0  
macro avg 0.697782 0.697786 0.697792 2077.0  
micro avg 0.703157 0.703157 0.703157 2077.0  
weighted avg 0.703153 0.703159 0.703157 2077.0

The result of Model Number:Dataset Number:Featuregroup Number:Rescale of 92 : 0 : 1 :  
1

|              | f1-score | precision | recall   | support |
|--------------|----------|-----------|----------|---------|
| AFIB         | 0.796374 | 0.806602  | 0.786441 | 875.0   |
| GSVT         | 0.805184 | 0.798673  | 0.811932 | 691.0   |
| SB           | 0.861317 | 0.858727  | 0.863924 | 1553.0  |
| SR           | 0.839989 | 0.839635  | 0.840353 | 907.0   |
| macro avg    | 0.825716 | 0.825909  | 0.825662 | 4026.0  |
| micro avg    | 0.832850 | 0.832850  | 0.832850 | 4026.0  |
| weighted avg | 0.832763 | 0.832790  | 0.832850 | 4026.0  |

The result of Model Number:Dataset Number:Featuregroup Number:Rescale of 92 : 0 : 2 :  
0

|              | f1-score | precision | recall   | support |
|--------------|----------|-----------|----------|---------|
| AFIB         | 0.877130 | 0.886098  | 0.868415 | 875.0   |
| GSVT         | 0.876867 | 0.863320  | 0.890948 | 691.0   |
| SB           | 0.924977 | 0.919454  | 0.930575 | 1553.0  |
| SR           | 0.900494 | 0.912547  | 0.888783 | 907.0   |
| macro avg    | 0.894867 | 0.895355  | 0.894680 | 4026.0  |
| micro avg    | 0.900849 | 0.900849  | 0.900849 | 4026.0  |
| weighted avg | 0.900805 | 0.901014  | 0.900849 | 4026.0  |

The result of Model Number:Dataset Number:Featuregroup Number:Rescale of 92 : 0 : 2 :  
1

|              | f1-score | precision | recall   | support |
|--------------|----------|-----------|----------|---------|
| AFIB         | 0.675379 | 0.666413  | 0.684642 | 875.0   |
| GSVT         | 0.689087 | 0.695620  | 0.682706 | 691.0   |
| SB           | 0.733288 | 0.731553  | 0.735034 | 1553.0  |
| SR           | 0.713395 | 0.720896  | 0.706078 | 907.0   |
| macro avg    | 0.702787 | 0.703621  | 0.702115 | 4026.0  |
| micro avg    | 0.708577 | 0.708577  | 0.708577 | 4026.0  |
| weighted avg | 0.708634 | 0.708828  | 0.708577 | 4026.0  |

The result of Model Number:Dataset Number:Featuregroup Number:Rescale of 92 : 0 : 3 :  
0

|              | f1-score | precision | recall   | support |
|--------------|----------|-----------|----------|---------|
| AFIB         | 0.794722 | 0.825603  | 0.766124 | 875.0   |
| GSVT         | 0.854351 | 0.848042  | 0.860868 | 691.0   |
| SB           | 0.938866 | 0.934029  | 0.943761 | 1553.0  |
| SR           | 0.883559 | 0.866710  | 0.901171 | 907.0   |
| macro avg    | 0.867875 | 0.868596  | 0.867981 | 4026.0  |
| micro avg    | 0.881332 | 0.881332  | 0.881332 | 4026.0  |
| weighted avg | 0.880573 | 0.880540  | 0.881332 | 4026.0  |

The result of Model Number:Dataset Number:Featuregroup Number:Rescale of 92 : 0 : 3 :  
1

|      | f1-score | precision | recall   | support |
|------|----------|-----------|----------|---------|
| AFIB | 0.899982 | 0.917321  | 0.883712 | 204.0   |

GSVT 0.916882 0.901984 0.932447 300.0  
SB 0.932189 0.921072 0.943581 892.0  
SR 0.914848 0.932001 0.898332 681.0  
macro avg 0.915976 0.918094 0.914518 2077.0  
micro avg 0.921256 0.921256 0.921256 2077.0  
weighted avg 0.921129 0.921530 0.921256 2077.0  
The result of Model Number:Dataset Number:Featuregroup Number:Rescale of 92 : 0 : 4 :  
0

f1-score precision recall support  
AFIB 0.741125 0.759608 0.723576 875.0  
GSVT 0.788427 0.791449 0.785464 691.0  
SB 0.853800 0.849666 0.857977 1553.0  
SR 0.809023 0.795538 0.823025 907.0  
macro avg 0.798094 0.799066 0.797510 4026.0  
micro avg 0.808447 0.808447 0.808447 4026.0  
weighted avg 0.808004 0.807907 0.808447 4026.0  
The result of Model Number:Dataset Number:Featuregroup Number:Rescale of 92 : 0 : 4 :  
1

f1-score precision recall support  
AFIB 0.815961 0.831911 0.800755 204.0  
GSVT 0.838382 0.832342 0.844539 300.0  
SB 0.853387 0.850066 0.856735 892.0  
SR 0.844059 0.846447 0.841702 681.0  
macro avg 0.837947 0.840191 0.835933 2077.0  
micro avg 0.844546 0.844546 0.844546 2077.0  
weighted avg 0.844485 0.844536 0.844546 2077.0  
The result of Model Number:Dataset Number:Featuregroup Number:Rescale of 92 : 0 : 5 :  
0

f1-score precision recall support  
AFIB 0.640454 0.631952 0.649238 875.0  
GSVT 0.653454 0.659648 0.647403 691.0  
SB 0.695368 0.693723 0.697024 1553.0  
SR 0.676504 0.683617 0.669565 907.0  
macro avg 0.666445 0.667235 0.665808 4026.0  
micro avg 0.671936 0.671936 0.671936 4026.0  
weighted avg 0.671990 0.672173 0.671936 4026.0  
The result of Model Number:Dataset Number:Featuregroup Number:Rescale of 92 : 0 : 5 :  
1

f1-score precision recall support  
AFIB 0.702512 0.724150 0.682271 204.0  
GSVT 0.720435 0.711615 0.729554 300.0  
SB 0.740003 0.735606 0.744477 892.0  
SR 0.727529 0.731118 0.724004 681.0  
macro avg 0.722620 0.725622 0.720077 2077.0

micro avg 0.729499 0.729499 0.729499 2077.0  
weighted avg 0.729404 0.729544 0.729499 2077.0  
The result of Model Number:Dataset Number:Featuregroup Number:Rescale of 92 : 0 : 6 :  
0

|              | f1-score | precision | recall   | support |
|--------------|----------|-----------|----------|---------|
| AFIB         | 0.678730 | 0.678392  | 0.679099 | 875.0   |
| GSVT         | 0.687173 | 0.691770  | 0.682691 | 691.0   |
| SB           | 0.728497 | 0.726823  | 0.730183 | 1553.0  |
| SR           | 0.707397 | 0.707229  | 0.707687 | 907.0   |
| macro avg    | 0.700449 | 0.701054  | 0.699915 | 4026.0  |
| micro avg    | 0.705861 | 0.705861  | 0.705861 | 4026.0  |
| weighted avg | 0.705835 | 0.705867  | 0.705861 | 4026.0  |

The result of Model Number:Dataset Number:Featuregroup Number:Rescale of 92 : 0 : 6 :  
1

|              | f1-score | precision | recall   | support |
|--------------|----------|-----------|----------|---------|
| AFIB         | 0.842662 | 0.847692  | 0.837714 | 204.0   |
| GSVT         | 0.863367 | 0.859659  | 0.867107 | 300.0   |
| SB           | 0.878153 | 0.876881  | 0.879432 | 892.0   |
| SR           | 0.870124 | 0.871921  | 0.868337 | 681.0   |
| macro avg    | 0.863576 | 0.864038  | 0.863148 | 2077.0  |
| micro avg    | 0.869916 | 0.869916  | 0.869916 | 2077.0  |
| weighted avg | 0.869899 | 0.869900  | 0.869916 | 2077.0  |

The result of Model Number:Dataset Number:Featuregroup Number:Rescale of 92 : 0 : 7 :  
0

|              | f1-score | precision | recall   | support |
|--------------|----------|-----------|----------|---------|
| AFIB         | 0.759769 | 0.791738  | 0.730349 | 204.0   |
| GSVT         | 0.785260 | 0.773240  | 0.797778 | 300.0   |
| SB           | 0.804200 | 0.798432  | 0.810061 | 892.0   |
| SR           | 0.783328 | 0.787311  | 0.779414 | 681.0   |
| macro avg    | 0.783139 | 0.787680  | 0.779401 | 2077.0  |
| micro avg    | 0.790409 | 0.790409  | 0.790409 | 2077.0  |
| weighted avg | 0.790257 | 0.790490  | 0.790409 | 2077.0  |

The result of Model Number:Dataset Number:Featuregroup Number:Rescale of 92 : 0 : 7 :  
1

|              | f1-score | precision | recall   | support |
|--------------|----------|-----------|----------|---------|
| AFIB         | 0.816194 | 0.860593  | 0.776360 | 204.0   |
| GSVT         | 0.856853 | 0.843894  | 0.870251 | 300.0   |
| SB           | 0.877215 | 0.871509  | 0.883010 | 892.0   |
| SR           | 0.866393 | 0.867174  | 0.865634 | 681.0   |
| macro avg    | 0.854164 | 0.860792  | 0.848814 | 2077.0  |
| micro avg    | 0.864995 | 0.864995  | 0.864995 | 2077.0  |
| weighted avg | 0.864732 | 0.865027  | 0.864995 | 2077.0  |

The result of Model Number:Dataset Number:Featuregroup Number:Rescale of 92 : 0 : 8 :  
0

f1-score precision recall support  
AFIB 0.773038 0.780085 0.766218 204.0  
GSVT 0.793211 0.790614 0.795850 300.0  
SB 0.807712 0.807173 0.808254 892.0  
SR 0.800608 0.800378 0.800850 681.0  
macro avg 0.793642 0.794563 0.792793 2077.0  
micro avg 0.799906 0.799906 0.799906 2077.0  
weighted avg 0.799883 0.799893 0.799906 2077.0  
The result of Model Number:Dataset Number:Featuregroup Number:Rescale of 92 : 0 : 8 :  
1

f1-score precision recall support  
AFIB 0.771679 0.765737 0.777772 875.0  
GSVT 0.781698 0.785327 0.778272 691.0  
SB 0.837698 0.833241 0.842220 1553.0  
SR 0.813017 0.824447 0.801988 907.0  
macro avg 0.801023 0.802188 0.800063 4026.0  
micro avg 0.808174 0.808174 0.808174 4026.0  
weighted avg 0.808177 0.808365 0.808174 4026.0  
The result of Model Number:Dataset Number:Featuregroup Number:Rescale of 92 : 0 : 9 :  
0

f1-score precision recall support  
AFIB 0.866218 0.859549 0.873058 875.0  
GSVT 0.877465 0.881539 0.873620 691.0  
SB 0.940326 0.935323 0.945402 1553.0  
SR 0.912621 0.925451 0.900241 907.0  
macro avg 0.899157 0.900465 0.898080 4026.0  
micro avg 0.907184 0.907184 0.907184 4026.0  
weighted avg 0.907189 0.907399 0.907184 4026.0  
The result of Model Number:Dataset Number:Featuregroup Number:Rescale of 92 : 0 : 9 :  
1

f1-score precision recall support  
AFIB 0.760994 0.754190 0.767955 875.0  
GSVT 0.773212 0.776271 0.770205 691.0  
SB 0.824409 0.822880 0.825949 1553.0  
SR 0.803519 0.810947 0.796256 907.0  
macro avg 0.790534 0.791072 0.790091 4026.0  
micro avg 0.797087 0.797087 0.797087 4026.0  
weighted avg 0.797133 0.797263 0.797087 4026.0  
The result of Model Number:Dataset Number:Featuregroup Number:Rescale of 92 : 0 :  
10 : 0

f1-score precision recall support  
AFIB 0.757498 0.746752 0.768577 875.0  
GSVT 0.773083 0.780618 0.765698 691.0  
SB 0.822711 0.820030 0.825411 1553.0

SR 0.803498 0.813767 0.793493 907.0  
macro avg 0.789197 0.790292 0.788295 4026.0  
micro avg 0.795619 0.795619 0.795619 4026.0  
weighted avg 0.795691 0.795928 0.795619 4026.0  
The result of Model Number:Dataset Number:Featuregroup Number:Rescale of 92 : 0 :  
10 : 1

f1-score precision recall support  
AFIB 0.799220 0.791181 0.807446 875.0  
GSVT 0.806372 0.813552 0.799377 691.0  
SB 0.853106 0.850488 0.855742 1553.0  
SR 0.836586 0.843909 0.829392 907.0  
macro avg 0.823821 0.824782 0.822989 4026.0  
micro avg 0.829635 0.829635 0.829635 4026.0  
weighted avg 0.829652 0.829777 0.829635 4026.0  
The result of Model Number:Dataset Number:Featuregroup Number:Rescale of 92 : 1 : 0 :  
0

f1-score precision recall support  
AFIB 0.668686 0.656186 0.681743 875.0  
GSVT 0.692109 0.703036 0.681604 691.0  
SB 0.736029 0.734713 0.737355 1553.0  
SR 0.717320 0.724920 0.709883 907.0  
macro avg 0.703536 0.704714 0.702646 4026.0  
micro avg 0.709510 0.709510 0.709510 4026.0  
weighted avg 0.709640 0.710003 0.709510 4026.0  
The result of Model Number:Dataset Number:Featuregroup Number:Rescale of 92 : 1 : 0 :  
1

f1-score precision recall support  
AFIB 0.671571 0.664316 0.764472 204.0  
GSVT 0.803492 0.797232 0.809921 300.0  
SB 0.655726 0.654355 0.657104 892.0  
SR 0.813115 0.812887 0.813353 681.0  
macro avg 0.735976 0.732197 0.761212 2077.0  
micro avg 0.740953 0.740953 0.740953 2077.0  
weighted avg 0.730230 0.727949 0.740953 2077.0  
The result of Model Number:Dataset Number:Featuregroup Number:Rescale of 92 : 1 : 1 :  
0

f1-score precision recall support  
AFIB 0.764789 0.773732 0.756193 204.0  
GSVT 0.689843 0.663506 0.787101 300.0  
SB 0.640034 0.638525 0.641555 892.0  
SR 0.794706 0.796233 0.793190 681.0  
macro avg 0.722343 0.717999 0.744510 2077.0  
micro avg 0.723555 0.723555 0.723555 2077.0  
weighted avg 0.710195 0.707122 0.723555 2077.0

The result of Model Number:Dataset Number:Featuregroup Number:Rescale of 92 : 1 : 1 : 1

|              | f1-score | precision | recall   | support |
|--------------|----------|-----------|----------|---------|
| AFIB         | 0.744847 | 0.734280  | 0.755741 | 875.0   |
| GSVT         | 0.760171 | 0.767580  | 0.752909 | 691.0   |
| SB           | 0.808970 | 0.806334  | 0.811626 | 1553.0  |
| SR           | 0.790078 | 0.800176  | 0.780240 | 907.0   |
| macro avg    | 0.776017 | 0.777092  | 0.775129 | 4026.0  |
| micro avg    | 0.782331 | 0.782331  | 0.782331 | 4026.0  |
| weighted avg | 0.782402 | 0.782635  | 0.782331 | 4026.0  |

The result of Model Number:Dataset Number:Featuregroup Number:Rescale of 92 : 1 : 2 : 0

|              | f1-score | precision | recall   | support |
|--------------|----------|-----------|----------|---------|
| AFIB         | 0.777867 | 0.777618  | 0.778157 | 875.0   |
| GSVT         | 0.789460 | 0.779312  | 0.799968 | 691.0   |
| SB           | 0.835043 | 0.833227  | 0.836871 | 1553.0  |
| SR           | 0.811939 | 0.823841  | 0.800389 | 907.0   |
| macro avg    | 0.803577 | 0.803499  | 0.803846 | 4026.0  |
| micro avg    | 0.809557 | 0.809557  | 0.809557 | 4026.0  |
| weighted avg | 0.809588 | 0.809773  | 0.809557 | 4026.0  |

The result of Model Number:Dataset Number:Featuregroup Number:Rescale of 92 : 1 : 2 : 1

|              | f1-score | precision | recall   | support |
|--------------|----------|-----------|----------|---------|
| AFIB         | 0.746763 | 0.737387  | 0.756597 | 875.0   |
| GSVT         | 0.692848 | 0.713825  | 0.675385 | 691.0   |
| SB           | 0.745961 | 0.690924  | 0.812496 | 1553.0  |
| SR           | 0.580008 | 0.709886  | 0.494585 | 907.0   |
| macro avg    | 0.691395 | 0.713005  | 0.684766 | 4026.0  |
| micro avg    | 0.705193 | 0.705193  | 0.705193 | 4026.0  |
| weighted avg | 0.699632 | 0.709225  | 0.705193 | 4026.0  |

The result of Model Number:Dataset Number:Featuregroup Number:Rescale of 92 : 1 : 3 : 0

|              | f1-score | precision | recall   | support |
|--------------|----------|-----------|----------|---------|
| AFIB         | 0.737491 | 0.748550  | 0.726963 | 204.0   |
| GSVT         | 0.764123 | 0.762094  | 0.766167 | 300.0   |
| SB           | 0.782223 | 0.781180  | 0.783275 | 892.0   |
| SR           | 0.774572 | 0.773574  | 0.775599 | 681.0   |
| macro avg    | 0.764602 | 0.766350  | 0.763001 | 2077.0  |
| micro avg    | 0.772756 | 0.772756  | 0.772756 | 2077.0  |
| weighted avg | 0.772707 | 0.772725  | 0.772756 | 2077.0  |

The result of Model Number:Dataset Number:Featuregroup Number:Rescale of 92 : 1 : 3 : 1

|      | f1-score | precision | recall   | support |
|------|----------|-----------|----------|---------|
| AFIB | 0.764466 | 0.749237  | 0.780366 | 875.0   |

GSVT 0.622208 0.578620 0.779920 691.0  
SB 0.504853 0.505723 0.503986 1553.0  
SR 0.818431 0.825638 0.811383 907.0  
macro avg 0.677489 0.664804 0.718914 4026.0  
micro avg 0.680666 0.680666 0.680666 4026.0  
weighted avg 0.652063 0.643231 0.680666 4026.0  
The result of Model Number:Dataset Number:Featuregroup Number:Rescale of 92 : 1 : 4 :  
0

f1-score precision recall support  
AFIB 0.699616 0.700828 0.698418 875.0  
GSVT 0.708099 0.699962 0.716485 691.0  
SB 0.745652 0.736661 0.754868 1553.0  
SR 0.710209 0.731728 0.689936 907.0  
macro avg 0.715894 0.717295 0.714927 4026.0  
micro avg 0.721383 0.721383 0.721383 4026.0  
weighted avg 0.721216 0.721463 0.721383 4026.0  
The result of Model Number:Dataset Number:Featuregroup Number:Rescale of 92 : 1 : 4 :  
1

f1-score precision recall support  
AFIB 0.738577 0.789006 0.694522 204.0  
GSVT 0.780749 0.764839 0.797403 300.0  
SB 0.800114 0.793100 0.807284 892.0  
SR 0.780378 0.782977 0.777866 681.0  
macro avg 0.774954 0.782480 0.769269 2077.0  
micro avg 0.785136 0.785136 0.785136 2077.0  
weighted avg 0.784802 0.785297 0.785136 2077.0  
The result of Model Number:Dataset Number:Featuregroup Number:Rescale of 92 : 1 : 5 :  
0

f1-score precision recall support  
AFIB 0.904184 0.925828 0.884852 204.0  
GSVT 0.930810 0.917695 0.944694 300.0  
SB 0.954995 0.945293 0.964942 892.0  
SR 0.932170 0.945629 0.919162 681.0  
macro avg 0.930540 0.933611 0.928413 2077.0  
micro avg 0.939141 0.939141 0.939141 2077.0  
weighted avg 0.939027 0.939505 0.939141 2077.0  
The result of Model Number:Dataset Number:Featuregroup Number:Rescale of 92 : 1 : 5 :  
1

f1-score precision recall support  
AFIB 0.849573 0.829772 0.870479 875.0  
GSVT 0.815560 0.824525 0.806843 691.0  
SB 0.858247 0.802826 0.921906 1553.0  
SR 0.686892 0.824825 0.588850 907.0  
macro avg 0.802568 0.820487 0.797019 4026.0



micro avg 0.815947 0.815947 0.815947 4026.0  
weighted avg 0.810431 0.817363 0.815947 4026.0  
The result of Model Number:Dataset Number:Featuregroup Number:Rescale of 92 : 1 : 6 :  
0

|              | f1-score | precision | recall   | support |
|--------------|----------|-----------|----------|---------|
| AFIB         | 0.759116 | 0.788023  | 0.732420 | 204.0   |
| GSVT         | 0.783301 | 0.775406  | 0.791393 | 300.0   |
| SB           | 0.798979 | 0.795002  | 0.803008 | 892.0   |
| SR           | 0.789328 | 0.789825  | 0.788858 | 681.0   |
| macro avg    | 0.782681 | 0.787064  | 0.778920 | 2077.0  |
| micro avg    | 0.789758 | 0.789758  | 0.789758 | 2077.0  |
| weighted avg | 0.789635 | 0.789789  | 0.789758 | 2077.0  |

The result of Model Number:Dataset Number:Featuregroup Number:Rescale of 92 : 1 : 6 :  
1

|              | f1-score | precision | recall   | support |
|--------------|----------|-----------|----------|---------|
| AFIB         | 0.864009 | 0.866792  | 0.861324 | 875.0   |
| GSVT         | 0.876156 | 0.862246  | 0.890602 | 691.0   |
| SB           | 0.923173 | 0.915465  | 0.931019 | 1553.0  |
| SR           | 0.876768 | 0.899036  | 0.855609 | 907.0   |
| macro avg    | 0.885027 | 0.885885  | 0.884638 | 4026.0  |
| micro avg    | 0.891946 | 0.891946  | 0.891946 | 4026.0  |
| weighted avg | 0.891790 | 0.892051  | 0.891946 | 4026.0  |

The result of Model Number:Dataset Number:Featuregroup Number:Rescale of 92 : 1 : 7 :  
0

|              | f1-score | precision | recall   | support |
|--------------|----------|-----------|----------|---------|
| AFIB         | 0.877103 | 0.891002  | 0.863748 | 204.0   |
| GSVT         | 0.899648 | 0.891992  | 0.907441 | 300.0   |
| SB           | 0.915181 | 0.913141  | 0.917233 | 892.0   |
| SR           | 0.906509 | 0.908525  | 0.904521 | 681.0   |
| macro avg    | 0.899610 | 0.901165  | 0.898236 | 2077.0  |
| micro avg    | 0.906397 | 0.906397  | 0.906397 | 2077.0  |
| weighted avg | 0.906354 | 0.906398  | 0.906397 | 2077.0  |

The result of Model Number:Dataset Number:Featuregroup Number:Rescale of 92 : 1 : 7 :  
1

|              | f1-score | precision | recall   | support |
|--------------|----------|-----------|----------|---------|
| AFIB         | 0.879144 | 0.867473  | 0.891202 | 875.0   |
| GSVT         | 0.896988 | 0.905491  | 0.888682 | 691.0   |
| SB           | 0.954524 | 0.952266  | 0.956797 | 1553.0  |
| SR           | 0.928629 | 0.938393  | 0.919104 | 907.0   |
| macro avg    | 0.914821 | 0.915906  | 0.913946 | 4026.0  |
| micro avg    | 0.922358 | 0.922358  | 0.922358 | 4026.0  |
| weighted avg | 0.922432 | 0.922684  | 0.922358 | 4026.0  |

The result of Model Number:Dataset Number:Featuregroup Number:Rescale of 92 : 1 : 8 :  
0

f1-score precision recall support  
AFIB 0.639292 0.637983 0.641071 875.0  
GSVT 0.648013 0.641211 0.655078 691.0  
SB 0.683436 0.674208 0.693054 1553.0  
SR 0.650180 0.674975 0.627290 907.0  
macro avg 0.655230 0.657094 0.654123 4026.0  
micro avg 0.660422 0.660422 0.660422 4026.0  
weighted avg 0.660270 0.660844 0.660422 4026.0  
The result of Model Number:Dataset Number:Featuregroup Number:Rescale of 92 : 1 : 8 :  
1

f1-score precision recall support  
AFIB 0.656815 0.671668 0.642625 875.0  
GSVT 0.696373 0.699337 0.693476 691.0  
SB 0.756117 0.752554 0.759719 1553.0  
SR 0.716411 0.705422 0.727777 907.0  
macro avg 0.706429 0.707245 0.705899 4026.0  
micro avg 0.715704 0.715704 0.715704 4026.0  
weighted avg 0.715336 0.715222 0.715704 4026.0  
The result of Model Number:Dataset Number:Featuregroup Number:Rescale of 92 : 1 : 9 :  
0

f1-score precision recall support  
AFIB 0.817129 0.808100 0.826378 875.0  
GSVT 0.831851 0.836973 0.826806 691.0  
SB 0.885346 0.883873 0.886829 1553.0  
SR 0.863789 0.871866 0.855882 907.0  
macro avg 0.849529 0.850203 0.848974 4026.0  
micro avg 0.856417 0.856417 0.856417 4026.0  
weighted avg 0.856482 0.856650 0.856417 4026.0  
The result of Model Number:Dataset Number:Featuregroup Number:Rescale of 92 : 1 : 9 :  
1

f1-score precision recall support  
AFIB 0.776343 0.793915 0.759631 204.0  
GSVT 0.797003 0.793100 0.800978 300.0  
SB 0.813307 0.810959 0.815676 892.0  
SR 0.808082 0.807733 0.808444 681.0  
macro avg 0.798684 0.801427 0.796182 2077.0  
micro avg 0.805677 0.805677 0.805677 2077.0  
weighted avg 0.805609 0.805648 0.805677 2077.0  
The result of Model Number:Dataset Number:Featuregroup Number:Rescale of 92 : 1 :  
10 : 0

f1-score precision recall support  
AFIB 0.713083 0.727388 0.699472 204.0  
GSVT 0.729609 0.722025 0.737393 300.0  
SB 0.743103 0.740212 0.746019 892.0

SR 0.735295 0.738363 0.732269 681.0  
macro avg 0.730273 0.731997 0.728788 2077.0  
micro avg 0.735693 0.735693 0.735693 2077.0  
weighted avg 0.735645 0.735719 0.735693 2077.0  
The result of Model Number:Dataset Number:Featuregroup Number:Rescale of 92 : 1 :  
10 : 1

f1-score precision recall support  
AFIB 0.658699 0.663480 0.654035 875.0  
GSVT 0.673149 0.666892 0.679574 691.0  
SB 0.723437 0.719070 0.727863 1553.0  
SR 0.699728 0.707541 0.692088 907.0  
macro avg 0.688753 0.689246 0.688390 4026.0  
micro avg 0.695470 0.695470 0.695470 4026.0  
weighted avg 0.695395 0.695435 0.695470 4026.0

The result of Model Number:Dataset Number:Featuregroup Number:Rescale of 93 : 0 : 0 :  
0

f1-score precision recall support  
AFIB 0.580514 0.576138 0.658876 204.0  
GSVT 0.703759 0.699592 0.707983 300.0  
SB 0.575577 0.574376 0.576786 892.0  
SR 0.711854 0.710714 0.713005 681.0  
macro avg 0.642926 0.640205 0.664163 2077.0  
micro avg 0.648462 0.648462 0.648462 2077.0  
weighted avg 0.639258 0.637337 0.648462 2077.0

The result of Model Number:Dataset Number:Featuregroup Number:Rescale of 93 : 0 : 0 :  
1

f1-score precision recall support  
AFIB 0.751841 0.788290 0.718698 204.0  
GSVT 0.783154 0.772921 0.793820 300.0  
SB 0.804247 0.798131 0.810468 892.0  
SR 0.781854 0.784190 0.779566 681.0  
macro avg 0.780274 0.785883 0.775638 2077.0  
micro avg 0.788918 0.788918 0.788918 2077.0  
weighted avg 0.788711 0.788952 0.788918 2077.0

The result of Model Number:Dataset Number:Featuregroup Number:Rescale of 93 : 0 : 1 :  
0

f1-score precision recall support  
AFIB 0.706291 0.723239 0.690440 204.0  
GSVT 0.731405 0.727165 0.735782 300.0  
SB 0.747025 0.744285 0.749788 892.0  
SR 0.740533 0.741083 0.739994 681.0  
macro avg 0.731314 0.733943 0.729001 2077.0  
micro avg 0.738724 0.738724 0.738724 2077.0  
weighted avg 0.738640 0.738695 0.738724 2077.0

The result of Model Number:Dataset Number:Featuregroup Number:Rescale of 93 : 0 : 1 :  
1

|              | f1-score | precision | recall   | support |
|--------------|----------|-----------|----------|---------|
| AFIB         | 0.846078 | 0.834359  | 0.858165 | 875.0   |
| GSVT         | 0.864843 | 0.871842  | 0.857960 | 691.0   |
| SB           | 0.918021 | 0.915383  | 0.920680 | 1553.0  |
| SR           | 0.895688 | 0.907346  | 0.884335 | 907.0   |
| macro avg    | 0.881157 | 0.882232  | 0.880285 | 4026.0  |
| micro avg    | 0.888140 | 0.888140  | 0.888140 | 4026.0  |
| weighted avg | 0.888227 | 0.888490  | 0.888140 | 4026.0  |

The result of Model Number:Dataset Number:Featuregroup Number:Rescale of 93 : 0 : 2 :  
0

|              | f1-score | precision | recall   | support |
|--------------|----------|-----------|----------|---------|
| AFIB         | 0.755800 | 0.747448  | 0.764354 | 875.0   |
| GSVT         | 0.769417 | 0.774154  | 0.764750 | 691.0   |
| SB           | 0.818897 | 0.817534  | 0.820268 | 1553.0  |
| SR           | 0.798957 | 0.806428  | 0.791644 | 907.0   |
| macro avg    | 0.785768 | 0.786391  | 0.785254 | 4026.0  |
| micro avg    | 0.792139 | 0.792139  | 0.792139 | 4026.0  |
| weighted avg | 0.792199 | 0.792354  | 0.792139 | 4026.0  |

The result of Model Number:Dataset Number:Featuregroup Number:Rescale of 93 : 0 : 2 :  
1

|              | f1-score | precision | recall   | support |
|--------------|----------|-----------|----------|---------|
| AFIB         | 0.703882 | 0.711385  | 0.696651 | 204.0   |
| GSVT         | 0.716827 | 0.712895  | 0.720882 | 300.0   |
| SB           | 0.733373 | 0.732151  | 0.734604 | 892.0   |
| SR           | 0.727260 | 0.728445  | 0.726089 | 681.0   |
| macro avg    | 0.720336 | 0.721219  | 0.719556 | 2077.0  |
| micro avg    | 0.726103 | 0.726103  | 0.726103 | 2077.0  |
| weighted avg | 0.726082 | 0.726115  | 0.726103 | 2077.0  |

The result of Model Number:Dataset Number:Featuregroup Number:Rescale of 93 : 0 : 3 :  
0

|              | f1-score | precision | recall   | support |
|--------------|----------|-----------|----------|---------|
| AFIB         | 0.646341 | 0.641469  | 0.733589 | 204.0   |
| GSVT         | 0.783561 | 0.778922  | 0.788264 | 300.0   |
| SB           | 0.640844 | 0.639507  | 0.642191 | 892.0   |
| SR           | 0.792574 | 0.791306  | 0.793856 | 681.0   |
| macro avg    | 0.715830 | 0.712801  | 0.739475 | 2077.0  |
| micro avg    | 0.721994 | 0.721994  | 0.721994 | 2077.0  |
| weighted avg | 0.711747 | 0.709608  | 0.721994 | 2077.0  |

The result of Model Number:Dataset Number:Featuregroup Number:Rescale of 93 : 0 : 3 :  
1

|      | f1-score | precision | recall   | support |
|------|----------|-----------|----------|---------|
| AFIB | 0.860588 | 0.860165  | 0.861078 | 875.0   |

GSVT 0.879270 0.874944 0.883694 691.0  
SB 0.919732 0.913719 0.925831 1553.0  
SR 0.893550 0.908105 0.879478 907.0  
macro avg 0.888285 0.889233 0.887520 4026.0  
micro avg 0.894083 0.894083 0.894083 4026.0  
weighted avg 0.894035 0.894160 0.894083 4026.0  
The result of Model Number:Dataset Number:Featuregroup Number:Rescale of 93 : 0 : 4 :  
0

f1-score precision recall support  
AFIB 0.870716 0.890424 0.851973 204.0  
GSVT 0.893887 0.889510 0.898346 300.0  
SB 0.912173 0.909539 0.914830 892.0  
SR 0.906313 0.905921 0.906718 681.0  
macro avg 0.895772 0.898849 0.892967 2077.0  
micro avg 0.903615 0.903615 0.903615 2077.0  
weighted avg 0.903539 0.903582 0.903615 2077.0  
The result of Model Number:Dataset Number:Featuregroup Number:Rescale of 93 : 0 : 4 :  
1

f1-score precision recall support  
AFIB 0.825862 0.830805 0.821020 204.0  
GSVT 0.847862 0.845342 0.850404 300.0  
SB 0.860846 0.859791 0.861906 892.0  
SR 0.854570 0.855579 0.853571 681.0  
macro avg 0.847285 0.847879 0.846725 2077.0  
micro avg 0.853496 0.853496 0.853496 2077.0  
weighted avg 0.853477 0.853476 0.853496 2077.0  
The result of Model Number:Dataset Number:Featuregroup Number:Rescale of 93 : 0 : 5 :  
0

f1-score precision recall support  
AFIB 0.666598 0.714780 0.624961 204.0  
GSVT 0.631407 0.634823 0.628287 300.0  
SB 0.659517 0.619970 0.704468 892.0  
SR 0.579106 0.624985 0.539576 681.0  
macro avg 0.634157 0.648640 0.624323 2077.0  
micro avg 0.631591 0.631591 0.631591 2077.0  
weighted avg 0.629788 0.633072 0.631591 2077.0  
The result of Model Number:Dataset Number:Featuregroup Number:Rescale of 93 : 0 : 5 :  
1

f1-score precision recall support  
AFIB 0.745060 0.730218 0.760556 875.0  
GSVT 0.606413 0.563932 0.760121 691.0  
SB 0.492037 0.492885 0.491193 1553.0  
SR 0.797655 0.804679 0.790786 907.0  
macro avg 0.660291 0.647928 0.700664 4026.0

micro avg 0.663387 0.663387 0.663387 4026.0  
weighted avg 0.635511 0.626903 0.663387 4026.0  
The result of Model Number:Dataset Number:Featuregroup Number:Rescale of 93 : 0 : 6 :  
0

|              | f1-score | precision | recall   | support |
|--------------|----------|-----------|----------|---------|
| AFIB         | 0.698718 | 0.700129  | 0.697328 | 204.0   |
| GSVT         | 0.718157 | 0.716022  | 0.720309 | 300.0   |
| SB           | 0.730057 | 0.729406  | 0.730711 | 892.0   |
| SR           | 0.723782 | 0.725172  | 0.722407 | 681.0   |
| macro avg    | 0.717679 | 0.717682  | 0.717689 | 2077.0  |
| micro avg    | 0.723207 | 0.723207  | 0.723207 | 2077.0  |
| weighted avg | 0.723203 | 0.723209  | 0.723207 | 2077.0  |

The result of Model Number:Dataset Number:Featuregroup Number:Rescale of 93 : 0 : 6 :  
1

|              | f1-score | precision | recall   | support |
|--------------|----------|-----------|----------|---------|
| AFIB         | 0.646108 | 0.703834  | 0.682304 | 204.0   |
| GSVT         | 0.877594 | 0.863248  | 0.892728 | 300.0   |
| SB           | 0.747104 | 0.741413  | 0.752938 | 892.0   |
| SR           | 0.913586 | 0.903249  | 0.924190 | 681.0   |
| macro avg    | 0.796098 | 0.802936  | 0.813040 | 2077.0  |
| micro avg    | 0.822341 | 0.822341  | 0.822341 | 2077.0  |
| weighted avg | 0.810618 | 0.808382  | 0.822341 | 2077.0  |

The result of Model Number:Dataset Number:Featuregroup Number:Rescale of 93 : 0 : 7 :  
0

|              | f1-score | precision | recall   | support |
|--------------|----------|-----------|----------|---------|
| AFIB         | 0.608188 | 0.662527  | 0.642260 | 204.0   |
| GSVT         | 0.826089 | 0.812585  | 0.840334 | 300.0   |
| SB           | 0.703257 | 0.697900  | 0.708748 | 892.0   |
| SR           | 0.859968 | 0.850238  | 0.869950 | 681.0   |
| macro avg    | 0.749376 | 0.755812  | 0.765323 | 2077.0  |
| micro avg    | 0.774078 | 0.774078  | 0.774078 | 2077.0  |
| weighted avg | 0.763043 | 0.760939  | 0.774078 | 2077.0  |

The result of Model Number:Dataset Number:Featuregroup Number:Rescale of 93 : 0 : 7 :  
1

|              | f1-score | precision | recall   | support |
|--------------|----------|-----------|----------|---------|
| AFIB         | 0.904390 | 0.914964  | 0.894231 | 204.0   |
| GSVT         | 0.929269 | 0.924996  | 0.933607 | 300.0   |
| SB           | 0.942426 | 0.939495  | 0.945381 | 892.0   |
| SR           | 0.934309 | 0.936958  | 0.931716 | 681.0   |
| macro avg    | 0.927598 | 0.929103  | 0.926234 | 2077.0  |
| micro avg    | 0.934176 | 0.934176  | 0.934176 | 2077.0  |
| weighted avg | 0.934128 | 0.934159  | 0.934176 | 2077.0  |

The result of Model Number:Dataset Number:Featuregroup Number:Rescale of 93 : 0 : 8 :  
0

f1-score precision recall support  
AFIB 0.890764 0.912087 0.871720 204.0  
GSVT 0.916995 0.904075 0.930673 300.0  
SB 0.940821 0.931263 0.950621 892.0  
SR 0.918335 0.931595 0.905520 681.0  
macro avg 0.916729 0.919755 0.914634 2077.0  
micro avg 0.925203 0.925203 0.925203 2077.0  
weighted avg 0.925091 0.925561 0.925203 2077.0  
The result of Model Number:Dataset Number:Featuregroup Number:Rescale of 93 : 0 : 8 :  
1

f1-score precision recall support  
AFIB 0.780507 0.794869 0.767051 204.0  
GSVT 0.809303 0.802525 0.816337 300.0  
SB 0.824500 0.823118 0.825886 892.0  
SR 0.817220 0.817946 0.816500 681.0  
macro avg 0.807882 0.809615 0.806443 2077.0  
micro avg 0.815651 0.815651 0.815651 2077.0  
weighted avg 0.815597 0.815673 0.815651 2077.0  
The result of Model Number:Dataset Number:Featuregroup Number:Rescale of 93 : 0 : 9 :  
0

f1-score precision recall support  
AFIB 0.878814 0.938819 0.826394 204.0  
GSVT 0.928994 0.910063 0.948810 300.0  
SB 0.952036 0.943690 0.960567 892.0  
SR 0.928553 0.931645 0.925564 681.0  
macro avg 0.922099 0.931054 0.915334 2077.0  
micro avg 0.934214 0.934214 0.934214 2077.0  
weighted avg 0.933817 0.934405 0.934214 2077.0  
The result of Model Number:Dataset Number:Featuregroup Number:Rescale of 93 : 0 : 9 :  
1

f1-score precision recall support  
AFIB 0.583043 0.640201 0.535824 204.0  
GSVT 0.684063 0.674843 0.693649 300.0  
SB 0.726261 0.723839 0.728703 892.0  
SR 0.707387 0.697903 0.717150 681.0  
macro avg 0.675189 0.684196 0.668832 2077.0  
micro avg 0.700908 0.700908 0.700908 2077.0  
weighted avg 0.699911 0.700043 0.700908 2077.0  
The result of Model Number:Dataset Number:Featuregroup Number:Rescale of 93 : 0 :  
10 : 0

f1-score precision recall support  
AFIB 0.807497 0.811616 0.803445 875.0  
GSVT 0.818640 0.814381 0.823015 691.0  
SB 0.858063 0.857296 0.858837 1553.0

SR 0.842263 0.842950 0.841612 907.0  
macro avg 0.831616 0.831561 0.831727 4026.0  
micro avg 0.836770 0.836770 0.836770 4026.0  
weighted avg 0.836747 0.836770 0.836770 4026.0  
The result of Model Number:Dataset Number:Featuregroup Number:Rescale of 93 : 0 :  
10 : 1

f1-score precision recall support  
AFIB 0.767490 0.790765 0.745577 875.0  
GSVT 0.819306 0.813624 0.825112 691.0  
SB 0.896421 0.892991 0.899882 1553.0  
SR 0.847798 0.835073 0.860966 907.0  
macro avg 0.832753 0.833113 0.832884 4026.0  
micro avg 0.844745 0.844745 0.844745 4026.0  
weighted avg 0.844210 0.844103 0.844745 4026.0

The result of Model Number:Dataset Number:Featuregroup Number:Rescale of 93 : 1 : 0 :  
0

f1-score precision recall support  
AFIB 0.745520 0.736160 0.755338 875.0  
GSVT 0.691695 0.712637 0.674261 691.0  
SB 0.744720 0.689775 0.811145 1553.0  
SR 0.579044 0.708705 0.493763 907.0  
macro avg 0.690245 0.711819 0.683627 4026.0  
micro avg 0.704020 0.704020 0.704020 4026.0  
weighted avg 0.698468 0.708045 0.704020 4026.0

The result of Model Number:Dataset Number:Featuregroup Number:Rescale of 93 : 1 : 0 :  
1

f1-score precision recall support  
AFIB 0.693220 0.696386 0.690120 875.0  
GSVT 0.704776 0.698816 0.710891 691.0  
SB 0.744963 0.737356 0.752733 1553.0  
SR 0.706515 0.721409 0.692261 907.0  
macro avg 0.712368 0.713492 0.711501 4026.0  
micro avg 0.718320 0.718320 0.718320 4026.0  
weighted avg 0.718158 0.718244 0.718320 4026.0

The result of Model Number:Dataset Number:Featuregroup Number:Rescale of 93 : 1 : 1 :  
0

f1-score precision recall support  
AFIB 0.769807 0.762999 0.776770 875.0  
GSVT 0.699888 0.677789 0.778640 691.0  
SB 0.630987 0.605835 0.670321 1553.0  
SR 0.650324 0.657053 0.643773 907.0  
macro avg 0.687752 0.675919 0.717376 4026.0  
micro avg 0.706067 0.706067 0.706067 4026.0  
weighted avg 0.677340 0.663881 0.706067 4026.0



The result of Model Number:Dataset Number:Featuregroup Number:Rescale of 93 : 1 : 1 : 1

|              | f1-score | precision | recall   | support |
|--------------|----------|-----------|----------|---------|
| AFIB         | 0.632881 | 0.696733  | 0.580121 | 204.0   |
| GSVT         | 0.746352 | 0.736050  | 0.757065 | 300.0   |
| SB           | 0.792481 | 0.789837  | 0.795146 | 892.0   |
| SR           | 0.772186 | 0.761503  | 0.783184 | 681.0   |
| macro avg    | 0.735975 | 0.746031  | 0.728879 | 2077.0  |
| micro avg    | 0.764604 | 0.764604  | 0.764604 | 2077.0  |
| weighted avg | 0.763488 | 0.763634  | 0.764604 | 2077.0  |

The result of Model Number:Dataset Number:Featuregroup Number:Rescale of 93 : 1 : 2 : 0

|              | f1-score | precision | recall   | support |
|--------------|----------|-----------|----------|---------|
| AFIB         | 0.713463 | 0.719103  | 0.707934 | 875.0   |
| GSVT         | 0.731416 | 0.729869  | 0.732996 | 691.0   |
| SB           | 0.779711 | 0.772819  | 0.786736 | 1553.0  |
| SR           | 0.758954 | 0.766397  | 0.751672 | 907.0   |
| macro avg    | 0.745886 | 0.747047  | 0.744834 | 4026.0  |
| micro avg    | 0.752486 | 0.752486  | 0.752486 | 4026.0  |
| weighted avg | 0.752347 | 0.752326  | 0.752486 | 4026.0  |

The result of Model Number:Dataset Number:Featuregroup Number:Rescale of 93 : 1 : 2 : 1

|              | f1-score | precision | recall   | support |
|--------------|----------|-----------|----------|---------|
| AFIB         | 0.673312 | 0.676061  | 0.670605 | 875.0   |
| GSVT         | 0.626983 | 0.654654  | 0.601659 | 691.0   |
| SB           | 0.673343 | 0.609961  | 0.751433 | 1553.0  |
| SR           | 0.507926 | 0.632161  | 0.424672 | 907.0   |
| macro avg    | 0.620391 | 0.643209  | 0.612092 | 4026.0  |
| micro avg    | 0.634545 | 0.634545  | 0.634545 | 4026.0  |
| weighted avg | 0.628113 | 0.636999  | 0.634545 | 4026.0  |

The result of Model Number:Dataset Number:Featuregroup Number:Rescale of 93 : 1 : 3 : 0

|              | f1-score | precision | recall   | support |
|--------------|----------|-----------|----------|---------|
| AFIB         | 0.661607 | 0.656307  | 0.667070 | 875.0   |
| GSVT         | 0.679878 | 0.681038  | 0.678801 | 691.0   |
| SB           | 0.720779 | 0.718846  | 0.722727 | 1553.0  |
| SR           | 0.701084 | 0.709246  | 0.693124 | 907.0   |
| macro avg    | 0.690837 | 0.691359  | 0.690431 | 4026.0  |
| micro avg    | 0.696422 | 0.696422  | 0.696422 | 4026.0  |
| weighted avg | 0.696462 | 0.696602  | 0.696422 | 4026.0  |

The result of Model Number:Dataset Number:Featuregroup Number:Rescale of 93 : 1 : 3 : 1

|      | f1-score | precision | recall   | support |
|------|----------|-----------|----------|---------|
| AFIB | 0.790228 | 0.779737  | 0.801066 | 875.0   |

GSVT 0.806267 0.813911 0.798801 691.0  
SB 0.857984 0.855954 0.860027 1553.0  
SR 0.834708 0.843485 0.826147 907.0  
macro avg 0.822297 0.823272 0.821510 4026.0  
micro avg 0.829071 0.829071 0.829071 4026.0  
weighted avg 0.829138 0.829364 0.829071 4026.0  
The result of Model Number:Dataset Number:Featuregroup Number:Rescale of 93 : 1 : 4 :  
0

f1-score precision recall support  
AFIB 0.787171 0.787381 0.787099 875.0  
GSVT 0.800879 0.797922 0.803958 691.0  
SB 0.856784 0.854704 0.858878 1553.0  
SR 0.836351 0.842353 0.830456 907.0  
macro avg 0.820296 0.820590 0.820098 4026.0  
micro avg 0.827449 0.827449 0.827449 4026.0  
weighted avg 0.827456 0.827544 0.827449 4026.0  
The result of Model Number:Dataset Number:Featuregroup Number:Rescale of 93 : 1 : 4 :  
1

f1-score precision recall support  
AFIB 0.820464 0.823107 0.817915 875.0  
GSVT 0.831999 0.818790 0.845716 691.0  
SB 0.876646 0.869327 0.884096 1553.0  
SR 0.832580 0.853725 0.812487 907.0  
macro avg 0.840422 0.841237 0.840054 4026.0  
micro avg 0.846993 0.846993 0.846993 4026.0  
weighted avg 0.846845 0.847093 0.846993 4026.0  
The result of Model Number:Dataset Number:Featuregroup Number:Rescale of 93 : 1 : 5 :  
0

f1-score precision recall support  
AFIB 0.891551 0.897965 0.885231 875.0  
GSVT 0.890131 0.884801 0.895539 691.0  
SB 0.938958 0.928554 0.949599 1553.0  
SR 0.901003 0.917077 0.885511 907.0  
macro avg 0.905411 0.907099 0.903970 4026.0  
micro avg 0.911893 0.911893 0.911893 4026.0  
weighted avg 0.911723 0.911811 0.911893 4026.0  
The result of Model Number:Dataset Number:Featuregroup Number:Rescale of 93 : 1 : 5 :  
1

f1-score precision recall support  
AFIB 0.757125 0.772581 0.742610 204.0  
GSVT 0.784618 0.777801 0.791698 300.0  
SB 0.799703 0.798275 0.801137 892.0  
SR 0.792259 0.792732 0.791792 681.0  
macro avg 0.783426 0.785347 0.781810 2077.0

micro avg 0.790962 0.790962 0.790962 2077.0  
weighted avg 0.790902 0.790977 0.790962 2077.0  
The result of Model Number:Dataset Number:Featuregroup Number:Rescale of 93 : 1 : 6 :  
0

|              | f1-score | precision | recall   | support |
|--------------|----------|-----------|----------|---------|
| AFIB         | 0.740650 | 0.802480  | 0.689144 | 204.0   |
| GSVT         | 0.794433 | 0.784444  | 0.805004 | 300.0   |
| SB           | 0.814714 | 0.803300  | 0.826552 | 892.0   |
| SR           | 0.792490 | 0.796203  | 0.789198 | 681.0   |
| macro avg    | 0.785572 | 0.796607  | 0.777475 | 2077.0  |
| micro avg    | 0.797696 | 0.797696  | 0.797696 | 2077.0  |
| weighted avg | 0.797224 | 0.798169  | 0.797696 | 2077.0  |

The result of Model Number:Dataset Number:Featuregroup Number:Rescale of 93 : 1 : 6 :  
1

|              | f1-score | precision | recall   | support |
|--------------|----------|-----------|----------|---------|
| AFIB         | 0.825433 | 0.844116  | 0.807664 | 204.0   |
| GSVT         | 0.847399 | 0.843250  | 0.851626 | 300.0   |
| SB           | 0.864734 | 0.862237  | 0.867252 | 892.0   |
| SR           | 0.859179 | 0.858807  | 0.859563 | 681.0   |
| macro avg    | 0.849186 | 0.852103  | 0.846526 | 2077.0  |
| micro avg    | 0.856621 | 0.856621  | 0.856621 | 2077.0  |
| weighted avg | 0.856549 | 0.856590  | 0.856621 | 2077.0  |

The result of Model Number:Dataset Number:Featuregroup Number:Rescale of 93 : 1 : 7 :  
0

|              | f1-score | precision | recall   | support |
|--------------|----------|-----------|----------|---------|
| AFIB         | 0.649055 | 0.707838  | 0.600368 | 204.0   |
| GSVT         | 0.753346 | 0.744738  | 0.762388 | 300.0   |
| SB           | 0.798879 | 0.796834  | 0.800939 | 892.0   |
| SR           | 0.779320 | 0.768766  | 0.790189 | 681.0   |
| macro avg    | 0.745150 | 0.754544  | 0.738471 | 2077.0  |
| micro avg    | 0.772146 | 0.772146  | 0.772146 | 2077.0  |
| weighted avg | 0.771174 | 0.771366  | 0.772146 | 2077.0  |

The result of Model Number:Dataset Number:Featuregroup Number:Rescale of 93 : 1 : 7 :  
1

|              | f1-score | precision | recall   | support |
|--------------|----------|-----------|----------|---------|
| AFIB         | 0.694174 | 0.687740  | 0.700768 | 875.0   |
| GSVT         | 0.706640 | 0.710478  | 0.702856 | 691.0   |
| SB           | 0.748726 | 0.747000  | 0.750460 | 1553.0  |
| SR           | 0.731281 | 0.738029  | 0.724678 | 907.0   |
| macro avg    | 0.720205 | 0.720812  | 0.719691 | 4026.0  |
| micro avg    | 0.725681 | 0.725681  | 0.725681 | 4026.0  |
| weighted avg | 0.725716 | 0.725831  | 0.725681 | 4026.0  |

The result of Model Number:Dataset Number:Featuregroup Number:Rescale of 93 : 1 : 8 :  
0

f1-score precision recall support  
AFIB 0.873079 0.878962 0.867404 875.0  
GSVT 0.888661 0.876317 0.901520 691.0  
SB 0.946965 0.940480 0.953547 1553.0  
SR 0.908590 0.924284 0.893469 907.0  
macro avg 0.904324 0.905011 0.903985 4026.0  
micro avg 0.912361 0.912361 0.912361 4026.0  
weighted avg 0.912254 0.912449 0.912361 4026.0  
The result of Model Number:Dataset Number:Featuregroup Number:Rescale of 93 : 1 : 8 :  
1

f1-score precision recall support  
AFIB 0.809008 0.813622 0.804580 204.0  
GSVT 0.825654 0.819699 0.831705 300.0  
SB 0.842329 0.839252 0.845443 892.0  
SR 0.833370 0.838843 0.827991 681.0  
macro avg 0.827590 0.827854 0.827430 2077.0  
micro avg 0.833723 0.833723 0.833723 2077.0  
weighted avg 0.833710 0.833776 0.833723 2077.0  
The result of Model Number:Dataset Number:Featuregroup Number:Rescale of 93 : 1 : 9 :  
0

f1-score precision recall support  
AFIB 0.821021 0.820104 0.821965 875.0  
GSVT 0.836039 0.825583 0.846788 691.0  
SB 0.878255 0.871194 0.885437 1553.0  
SR 0.839071 0.861086 0.818167 907.0  
macro avg 0.843597 0.844492 0.843090 4026.0  
micro avg 0.849854 0.849854 0.849854 4026.0  
weighted avg 0.849743 0.849985 0.849854 4026.0  
The result of Model Number:Dataset Number:Featuregroup Number:Rescale of 93 : 1 : 9 :  
1

f1-score precision recall support  
AFIB 0.766345 0.803497 0.732562 204.0  
GSVT 0.798262 0.787831 0.809134 300.0  
SB 0.819762 0.813528 0.826103 892.0  
SR 0.796937 0.799318 0.794605 681.0  
macro avg 0.795326 0.801043 0.790601 2077.0  
micro avg 0.804137 0.804137 0.804137 2077.0  
weighted avg 0.803926 0.804172 0.804137 2077.0  
The result of Model Number:Dataset Number:Featuregroup Number:Rescale of 93 : 1 :  
10 : 0

f1-score precision recall support  
AFIB 0.916800 0.916744 0.916912 875.0  
GSVT 0.918784 0.913816 0.923821 691.0  
SB 0.962678 0.956272 0.969182 1553.0

SR 0.937115 0.952490 0.922263 907.0  
macro avg 0.933844 0.934831 0.933045 4026.0  
micro avg 0.939466 0.939466 0.939466 4026.0  
weighted avg 0.939414 0.939542 0.939466 4026.0  
The result of Model Number:Dataset Number:Featuregroup Number:Rescale of 93 : 1 :  
10 : 1

f1-score precision recall support  
AFIB 0.702976 0.730293 0.677680 875.0  
GSVT 0.755722 0.750141 0.761487 691.0  
SB 0.830481 0.826202 0.834810 1553.0  
SR 0.781558 0.766654 0.797137 907.0  
macro avg 0.767684 0.768323 0.767778 4026.0  
micro avg 0.779588 0.779588 0.779588 4026.0  
weighted avg 0.778917 0.778888 0.779588 4026.0

The result of Model Number:Dataset Number:Featuregroup Number:Rescale of 94 : 0 : 0 :  
0

f1-score precision recall support  
AFIB 0.715837 0.718300 0.713481 875.0  
GSVT 0.729427 0.714874 0.744716 691.0  
SB 0.772156 0.767981 0.776382 1553.0  
SR 0.742291 0.759550 0.725843 907.0  
macro avg 0.739928 0.740176 0.740105 4026.0  
micro avg 0.745891 0.745891 0.745891 4026.0  
weighted avg 0.745854 0.746169 0.745891 4026.0

The result of Model Number:Dataset Number:Featuregroup Number:Rescale of 94 : 0 : 0 :  
1

f1-score precision recall support  
AFIB 0.695940 0.725766 0.668732 204.0  
GSVT 0.719325 0.708457 0.730578 300.0  
SB 0.733593 0.726338 0.740996 892.0  
SR 0.713718 0.719824 0.707741 681.0  
macro avg 0.715644 0.720096 0.712012 2077.0  
micro avg 0.721490 0.721490 0.721490 2077.0  
weighted avg 0.721317 0.721563 0.721490 2077.0

The result of Model Number:Dataset Number:Featuregroup Number:Rescale of 94 : 0 : 1 :  
0

f1-score precision recall support  
AFIB 0.838287 0.821358 0.855996 875.0  
GSVT 0.866080 0.879851 0.852921 691.0  
SB 0.921522 0.921470 0.921581 1553.0  
SR 0.899180 0.907373 0.891148 907.0  
macro avg 0.881267 0.882513 0.880411 4026.0  
micro avg 0.888686 0.888686 0.888686 4026.0  
weighted avg 0.888883 0.889393 0.888686 4026.0

The result of Model Number:Dataset Number:Featuregroup Number:Rescale of 94 : 0 : 1 : 1

|              | f1-score | precision | recall   | support |
|--------------|----------|-----------|----------|---------|
| AFIB         | 0.759380 | 0.750423  | 0.768584 | 875.0   |
| GSVT         | 0.774302 | 0.781036  | 0.767689 | 691.0   |
| SB           | 0.825215 | 0.822056  | 0.828401 | 1553.0  |
| SR           | 0.805744 | 0.815486  | 0.796241 | 907.0   |
| macro avg    | 0.791160 | 0.792250  | 0.790229 | 4026.0  |
| micro avg    | 0.797735 | 0.797735  | 0.797735 | 4026.0  |
| weighted avg | 0.797781 | 0.797967  | 0.797735 | 4026.0  |

The result of Model Number:Dataset Number:Featuregroup Number:Rescale of 94 : 0 : 2 : 0

|              | f1-score | precision | recall   | support |
|--------------|----------|-----------|----------|---------|
| AFIB         | 0.654368 | 0.655540  | 0.653221 | 875.0   |
| GSVT         | 0.626601 | 0.629892  | 0.623361 | 691.0   |
| SB           | 0.662792 | 0.626332  | 0.703765 | 1553.0  |
| SR           | 0.550452 | 0.619574  | 0.495253 | 907.0   |
| macro avg    | 0.623553 | 0.632834  | 0.618900 | 4026.0  |
| micro avg    | 0.632005 | 0.632005  | 0.632005 | 4026.0  |
| weighted avg | 0.629441 | 0.631769  | 0.632005 | 4026.0  |

The result of Model Number:Dataset Number:Featuregroup Number:Rescale of 94 : 0 : 2 : 1

|              | f1-score | precision | recall   | support |
|--------------|----------|-----------|----------|---------|
| AFIB         | 0.785270 | 0.770591  | 0.800603 | 875.0   |
| GSVT         | 0.812777 | 0.825609  | 0.800440 | 691.0   |
| SB           | 0.864354 | 0.862809  | 0.865911 | 1553.0  |
| SR           | 0.842384 | 0.851308  | 0.833649 | 907.0   |
| macro avg    | 0.826196 | 0.827579  | 0.825151 | 4026.0  |
| micro avg    | 0.833212 | 0.833212  | 0.833212 | 4026.0  |
| weighted avg | 0.833364 | 0.833791  | 0.833212 | 4026.0  |

The result of Model Number:Dataset Number:Featuregroup Number:Rescale of 94 : 0 : 3 : 0

|              | f1-score | precision | recall   | support |
|--------------|----------|-----------|----------|---------|
| AFIB         | 0.767664 | 0.772246  | 0.763157 | 204.0   |
| GSVT         | 0.786526 | 0.783149  | 0.789934 | 300.0   |
| SB           | 0.799996 | 0.798838  | 0.801161 | 892.0   |
| SR           | 0.792682 | 0.794319  | 0.791055 | 681.0   |
| macro avg    | 0.786717 | 0.787138  | 0.786327 | 2077.0  |
| micro avg    | 0.792493 | 0.792493  | 0.792493 | 2077.0  |
| weighted avg | 0.792477 | 0.792478  | 0.792493 | 2077.0  |

The result of Model Number:Dataset Number:Featuregroup Number:Rescale of 94 : 0 : 3 : 1

|      | f1-score | precision | recall   | support |
|------|----------|-----------|----------|---------|
| AFIB | 0.738601 | 0.749496  | 0.728098 | 204.0   |

GSVT 0.756732 0.753762 0.759751 300.0  
SB 0.773539 0.771988 0.775099 892.0  
SR 0.768052 0.768168 0.767943 681.0  
macro avg 0.759231 0.760853 0.757723 2077.0  
micro avg 0.765920 0.765920 0.765920 2077.0  
weighted avg 0.765881 0.765894 0.765920 2077.0  
The result of Model Number:Dataset Number:Featuregroup Number:Rescale of 94 : 0 : 4 :  
0

f1-score precision recall support

AFIB 0.662753 0.658419 0.667202 875.0  
GSVT 0.682452 0.688258 0.676833 691.0  
SB 0.726561 0.724979 0.728152 1553.0  
SR 0.708855 0.711701 0.706042 907.0  
macro avg 0.695155 0.695839 0.694557 4026.0  
micro avg 0.701116 0.701116 0.701116 4026.0  
weighted avg 0.701134 0.701219 0.701116 4026.0  
The result of Model Number:Dataset Number:Featuregroup Number:Rescale of 94 : 0 : 4 :  
1

f1-score precision recall support

AFIB 0.731635 0.737256 0.726267 204.0  
GSVT 0.757400 0.756674 0.758152 300.0  
SB 0.772895 0.771095 0.774712 892.0  
SR 0.765783 0.766815 0.764770 681.0  
macro avg 0.756928 0.757960 0.755975 2077.0  
micro avg 0.764302 0.764302 0.764302 2077.0  
weighted avg 0.764273 0.764285 0.764302 2077.0  
The result of Model Number:Dataset Number:Featuregroup Number:Rescale of 94 : 0 : 5 :  
0

f1-score precision recall support

AFIB 0.643726 0.645517 0.641979 875.0  
GSVT 0.658472 0.658289 0.658661 691.0  
SB 0.701294 0.694702 0.708019 1553.0  
SR 0.682711 0.692557 0.673150 907.0  
macro avg 0.671551 0.672766 0.670452 4026.0  
micro avg 0.677339 0.677339 0.677339 4026.0  
weighted avg 0.677246 0.677279 0.677339 4026.0  
The result of Model Number:Dataset Number:Featuregroup Number:Rescale of 94 : 0 : 5 :  
1

f1-score precision recall support

AFIB 0.868481 0.873037 0.864025 875.0  
GSVT 0.886641 0.885048 0.888302 691.0  
SB 0.962740 0.955357 0.970240 1553.0  
SR 0.928774 0.938070 0.919665 907.0  
macro avg 0.911659 0.912878 0.910558 4026.0

micro avg 0.921699 0.921699 0.921699 4026.0  
weighted avg 0.921541 0.921504 0.921699 4026.0  
The result of Model Number:Dataset Number:Featuregroup Number:Rescale of 94 : 0 : 6 :  
0

|              | f1-score | precision | recall   | support |
|--------------|----------|-----------|----------|---------|
| AFIB         | 0.673621 | 0.672537  | 0.674983 | 875.0   |
| GSVT         | 0.689327 | 0.685734  | 0.692998 | 691.0   |
| SB           | 0.720727 | 0.714621  | 0.726944 | 1553.0  |
| SR           | 0.693214 | 0.708625  | 0.678692 | 907.0   |
| macro avg    | 0.694222 | 0.695379  | 0.693404 | 4026.0  |
| micro avg    | 0.698954 | 0.698954  | 0.698954 | 4026.0  |
| weighted avg | 0.698901 | 0.699166  | 0.698954 | 4026.0  |

The result of Model Number:Dataset Number:Featuregroup Number:Rescale of 94 : 0 : 6 :  
1

|              | f1-score | precision | recall   | support |
|--------------|----------|-----------|----------|---------|
| AFIB         | 0.786324 | 0.810170  | 0.763874 | 875.0   |
| GSVT         | 0.839412 | 0.833591  | 0.845360 | 691.0   |
| SB           | 0.918419 | 0.914906  | 0.921965 | 1553.0  |
| SR           | 0.868603 | 0.855566  | 0.882094 | 907.0   |
| macro avg    | 0.853189 | 0.853558  | 0.853323 | 4026.0  |
| micro avg    | 0.865476 | 0.865476  | 0.865476 | 4026.0  |
| weighted avg | 0.864927 | 0.864818  | 0.865476 | 4026.0  |

The result of Model Number:Dataset Number:Featuregroup Number:Rescale of 94 : 0 : 7 :  
0

|              | f1-score | precision | recall   | support |
|--------------|----------|-----------|----------|---------|
| AFIB         | 0.781328 | 0.857925  | 0.718051 | 204.0   |
| GSVT         | 0.916705 | 0.904349  | 0.929550 | 300.0   |
| SB           | 0.973254 | 0.970007  | 0.976526 | 892.0   |
| SR           | 0.947960 | 0.935251  | 0.961044 | 681.0   |
| macro avg    | 0.904812 | 0.916883  | 0.896293 | 2077.0  |
| micro avg    | 0.939278 | 0.939278  | 0.939278 | 2077.0  |
| weighted avg | 0.937942 | 0.938119  | 0.939278 | 2077.0  |

The result of Model Number:Dataset Number:Featuregroup Number:Rescale of 94 : 0 : 7 :  
1

|              | f1-score | precision | recall   | support |
|--------------|----------|-----------|----------|---------|
| AFIB         | 0.791340 | 0.821474  | 0.763511 | 204.0   |
| GSVT         | 0.816552 | 0.808322  | 0.824988 | 300.0   |
| SB           | 0.832896 | 0.828750  | 0.837096 | 892.0   |
| SR           | 0.822835 | 0.823353  | 0.822345 | 681.0   |
| macro avg    | 0.815906 | 0.820475  | 0.811985 | 2077.0  |
| micro avg    | 0.823283 | 0.823283  | 0.823283 | 2077.0  |
| weighted avg | 0.823155 | 0.823315  | 0.823283 | 2077.0  |

The result of Model Number:Dataset Number:Featuregroup Number:Rescale of 94 : 0 : 8 :  
0



f1-score precision recall support  
AFIB 0.704539 0.717614 0.692106 204.0  
GSVT 0.720031 0.716255 0.723861 300.0  
SB 0.731526 0.728926 0.734149 892.0  
SR 0.723995 0.725300 0.722726 681.0  
macro avg 0.720023 0.722024 0.718211 2077.0  
micro avg 0.724788 0.724788 0.724788 2077.0  
weighted avg 0.724746 0.724796 0.724788 2077.0  
The result of Model Number:Dataset Number:Featuregroup Number:Rescale of 94 : 0 : 8 :  
1

f1-score precision recall support  
AFIB 0.815963 0.817540 0.814454 875.0  
GSVT 0.790531 0.787058 0.794081 691.0  
SB 0.826010 0.775805 0.883186 1553.0  
SR 0.664823 0.770336 0.584890 907.0  
macro avg 0.774332 0.787685 0.769153 4026.0  
micro avg 0.785753 0.785753 0.785753 4026.0  
weighted avg 0.781424 0.785575 0.785753 4026.0  
The result of Model Number:Dataset Number:Featuregroup Number:Rescale of 94 : 0 : 9 :  
0

f1-score precision recall support  
AFIB 0.862874 0.881827 0.845040 204.0  
GSVT 0.890682 0.883483 0.898121 300.0  
SB 0.909349 0.908230 0.910471 892.0  
SR 0.901672 0.900888 0.902463 681.0  
macro avg 0.891144 0.893607 0.889024 2077.0  
micro avg 0.899635 0.899635 0.899635 2077.0  
weighted avg 0.899571 0.899655 0.899635 2077.0  
The result of Model Number:Dataset Number:Featuregroup Number:Rescale of 94 : 0 : 9 :  
1

f1-score precision recall support  
AFIB 0.877333 0.914934 0.843033 204.0  
GSVT 0.906814 0.893113 0.921000 300.0  
SB 0.924800 0.915654 0.934133 892.0  
SR 0.899745 0.907442 0.892210 681.0  
macro avg 0.902173 0.907786 0.897594 2077.0  
micro avg 0.909543 0.909543 0.909543 2077.0  
weighted avg 0.909325 0.909635 0.909543 2077.0  
The result of Model Number:Dataset Number:Featuregroup Number:Rescale of 94 : 0 :  
10 : 0

f1-score precision recall support  
AFIB 0.601881 0.614529 0.589765 875.0  
GSVT 0.640932 0.643134 0.638777 691.0  
SB 0.698305 0.695014 0.701630 1553.0

SR 0.661024 0.652221 0.670123 907.0  
macro avg 0.650535 0.651224 0.650074 4026.0  
micro avg 0.659432 0.659432 0.659432 4026.0  
weighted avg 0.659102 0.658976 0.659432 4026.0  
The result of Model Number:Dataset Number:Featuregroup Number:Rescale of 94 : 0 :  
10 : 1

f1-score precision recall support  
AFIB 0.844077 0.851867 0.836475 875.0  
GSVT 0.863787 0.861455 0.866162 691.0  
SB 0.919945 0.911298 0.928767 1553.0  
SR 0.894528 0.903504 0.885746 907.0  
macro avg 0.880585 0.882031 0.879288 4026.0  
micro avg 0.888271 0.888271 0.888271 4026.0  
weighted avg 0.888092 0.888071 0.888271 4026.0  
The result of Model Number:Dataset Number:Featuregroup Number:Rescale of 94 : 1 : 0 :  
0

f1-score precision recall support  
AFIB 0.887765 0.897228 0.878645 204.0  
GSVT 0.904092 0.899132 0.909207 300.0  
SB 0.924961 0.923419 0.926514 892.0  
SR 0.917251 0.918745 0.915773 681.0  
macro avg 0.908517 0.909631 0.907535 2077.0  
micro avg 0.915791 0.915791 0.915791 2077.0  
weighted avg 0.915765 0.915806 0.915791 2077.0  
The result of Model Number:Dataset Number:Featuregroup Number:Rescale of 94 : 1 : 0 :  
1

f1-score precision recall support  
AFIB 0.876177 0.884132 0.868814 204.0  
GSVT 0.905135 0.899665 0.910910 300.0  
SB 0.924072 0.922833 0.925314 892.0  
SR 0.915522 0.917420 0.913637 681.0  
macro avg 0.905226 0.906013 0.904669 2077.0  
micro avg 0.913856 0.913856 0.913856 2077.0  
weighted avg 0.913829 0.913911 0.913856 2077.0  
The result of Model Number:Dataset Number:Featuregroup Number:Rescale of 94 : 1 : 1 :  
0

f1-score precision recall support  
AFIB 0.888332 0.888491 0.888212 875.0  
GSVT 0.897731 0.900763 0.894775 691.0  
SB 0.943020 0.939768 0.946299 1553.0  
SR 0.925113 0.928233 0.922047 907.0  
macro avg 0.913549 0.914314 0.912833 4026.0  
micro avg 0.919368 0.919368 0.919368 4026.0  
weighted avg 0.919327 0.919330 0.919368 4026.0

The result of Model Number:Dataset Number:Featuregroup Number:Rescale of 94 : 1 : 1 : 1

|              | f1-score | precision | recall   | support |
|--------------|----------|-----------|----------|---------|
| AFIB         | 0.875336 | 0.883212  | 0.867873 | 875.0   |
| GSVT         | 0.893166 | 0.875056  | 0.912253 | 691.0   |
| SB           | 0.947209 | 0.936671  | 0.958100 | 1553.0  |
| SR           | 0.909622 | 0.936661  | 0.884315 | 907.0   |
| macro avg    | 0.906333 | 0.907900  | 0.905635 | 4026.0  |
| micro avg    | 0.913999 | 0.913999  | 0.913999 | 4026.0  |
| weighted avg | 0.913845 | 0.914475  | 0.913999 | 4026.0  |

The result of Model Number:Dataset Number:Featuregroup Number:Rescale of 94 : 1 : 2 : 0

|              | f1-score | precision | recall   | support |
|--------------|----------|-----------|----------|---------|
| AFIB         | 0.860602 | 0.867038  | 0.854295 | 204.0   |
| GSVT         | 0.882592 | 0.877934  | 0.887300 | 300.0   |
| SB           | 0.897486 | 0.896286  | 0.898693 | 892.0   |
| SR           | 0.889582 | 0.891288  | 0.887885 | 681.0   |
| macro avg    | 0.882566 | 0.883136  | 0.882043 | 2077.0  |
| micro avg    | 0.889143 | 0.889143  | 0.889143 | 2077.0  |
| weighted avg | 0.889121 | 0.889124  | 0.889143 | 2077.0  |

The result of Model Number:Dataset Number:Featuregroup Number:Rescale of 94 : 1 : 2 : 1

|              | f1-score | precision | recall   | support |
|--------------|----------|-----------|----------|---------|
| AFIB         | 0.843965 | 0.904967  | 0.791249 | 204.0   |
| GSVT         | 0.799410 | 0.803734  | 0.795459 | 300.0   |
| SB           | 0.835000 | 0.784930  | 0.891911 | 892.0   |
| SR           | 0.733192 | 0.791279  | 0.683144 | 681.0   |
| macro avg    | 0.802892 | 0.821228  | 0.790441 | 2077.0  |
| micro avg    | 0.799643 | 0.799643  | 0.799643 | 2077.0  |
| weighted avg | 0.797359 | 0.801518  | 0.799643 | 2077.0  |

The result of Model Number:Dataset Number:Featuregroup Number:Rescale of 94 : 1 : 3 : 0

|              | f1-score | precision | recall   | support |
|--------------|----------|-----------|----------|---------|
| AFIB         | 0.641472 | 0.710594  | 0.585119 | 204.0   |
| GSVT         | 0.756128 | 0.745529  | 0.767227 | 300.0   |
| SB           | 0.802825 | 0.800240  | 0.805434 | 892.0   |
| SR           | 0.782270 | 0.770371  | 0.794562 | 681.0   |
| macro avg    | 0.745673 | 0.756684  | 0.738086 | 2077.0  |
| micro avg    | 0.774712 | 0.774712  | 0.774712 | 2077.0  |
| weighted avg | 0.773493 | 0.773739  | 0.774712 | 2077.0  |

The result of Model Number:Dataset Number:Featuregroup Number:Rescale of 94 : 1 : 3 : 1

|      | f1-score | precision | recall   | support |
|------|----------|-----------|----------|---------|
| AFIB | 0.877404 | 0.878590  | 0.876387 | 875.0   |

GSVT 0.891069 0.890611 0.891561 691.0  
SB 0.930630 0.927300 0.933987 1553.0  
SR 0.908344 0.913436 0.903368 907.0  
macro avg 0.901862 0.902484 0.901326 4026.0  
micro avg 0.907288 0.907288 0.907288 4026.0  
weighted avg 0.907251 0.907293 0.907288 4026.0  
The result of Model Number:Dataset Number:Featuregroup Number:Rescale of 94 : 1 : 4 :  
0

f1-score precision recall support  
AFIB 0.566453 0.620974 0.520926 204.0  
GSVT 0.658787 0.652018 0.665821 300.0  
SB 0.698364 0.695648 0.701104 892.0  
SR 0.682184 0.672750 0.691897 681.0  
macro avg 0.651447 0.660348 0.644937 2077.0  
micro avg 0.675292 0.675292 0.675292 2077.0  
weighted avg 0.674387 0.674504 0.675292 2077.0  
The result of Model Number:Dataset Number:Featuregroup Number:Rescale of 94 : 1 : 4 :  
1

f1-score precision recall support  
AFIB 0.750474 0.746273 0.754760 875.0  
GSVT 0.756586 0.761049 0.752220 691.0  
SB 0.797001 0.794506 0.799513 1553.0  
SR 0.781222 0.786391 0.776140 907.0  
macro avg 0.771321 0.772055 0.770658 4026.0  
micro avg 0.776404 0.776404 0.776404 4026.0  
weighted avg 0.776398 0.776453 0.776404 4026.0  
The result of Model Number:Dataset Number:Featuregroup Number:Rescale of 94 : 1 : 5 :  
0

f1-score precision recall support  
AFIB 0.767226 0.851464 0.698340 204.0  
GSVT 0.895841 0.884641 0.907503 300.0  
SB 0.953130 0.948267 0.958045 892.0  
SR 0.930802 0.917789 0.944194 681.0  
macro avg 0.886750 0.900540 0.877020 2077.0  
micro avg 0.920695 0.920695 0.920695 2077.0  
weighted avg 0.919275 0.919576 0.920695 2077.0  
The result of Model Number:Dataset Number:Featuregroup Number:Rescale of 94 : 1 : 5 :  
1

f1-score precision recall support  
AFIB 0.675863 0.747327 0.617225 204.0  
GSVT 0.777668 0.768668 0.787030 300.0  
SB 0.822212 0.818831 0.825622 892.0  
SR 0.804555 0.792638 0.816844 681.0  
macro avg 0.770075 0.781866 0.761681 2077.0

micro avg 0.796702 0.796702 0.796702 2077.0  
weighted avg 0.795615 0.795974 0.796702 2077.0  
The result of Model Number:Dataset Number:Featuregroup Number:Rescale of 94 : 1 : 6 :  
0

|              | f1-score | precision | recall   | support |
|--------------|----------|-----------|----------|---------|
| AFIB         | 0.834999 | 0.834582  | 0.835453 | 875.0   |
| GSVT         | 0.845385 | 0.851042  | 0.839872 | 691.0   |
| SB           | 0.896224 | 0.894165  | 0.898299 | 1553.0  |
| SR           | 0.870267 | 0.870060  | 0.870623 | 907.0   |
| macro avg    | 0.861719 | 0.862462  | 0.861062 | 4026.0  |
| micro avg    | 0.868377 | 0.868377  | 0.868377 | 4026.0  |
| weighted avg | 0.868344 | 0.868384  | 0.868377 | 4026.0  |

The result of Model Number:Dataset Number:Featuregroup Number:Rescale of 94 : 1 : 6 :  
1

|              | f1-score | precision | recall   | support |
|--------------|----------|-----------|----------|---------|
| AFIB         | 0.764870 | 0.860028  | 0.689345 | 204.0   |
| GSVT         | 0.907462 | 0.888084  | 0.927744 | 300.0   |
| SB           | 0.968732 | 0.963794  | 0.973726 | 892.0   |
| SR           | 0.946999 | 0.935007  | 0.959364 | 681.0   |
| macro avg    | 0.897016 | 0.911728  | 0.887545 | 2077.0  |
| micro avg    | 0.934444 | 0.934444  | 0.934444 | 2077.0  |
| weighted avg | 0.932734 | 0.933228  | 0.934444 | 2077.0  |

The result of Model Number:Dataset Number:Featuregroup Number:Rescale of 94 : 1 : 7 :  
0

|              | f1-score | precision | recall   | support |
|--------------|----------|-----------|----------|---------|
| AFIB         | 0.729797 | 0.736856  | 0.723003 | 204.0   |
| GSVT         | 0.755621 | 0.754131  | 0.757129 | 300.0   |
| SB           | 0.771415 | 0.770048  | 0.772796 | 892.0   |
| SR           | 0.764303 | 0.764673  | 0.763966 | 681.0   |
| macro avg    | 0.755284 | 0.756427  | 0.754223 | 2077.0  |
| micro avg    | 0.762747 | 0.762747  | 0.762747 | 2077.0  |
| weighted avg | 0.762714 | 0.762726  | 0.762747 | 2077.0  |

The result of Model Number:Dataset Number:Featuregroup Number:Rescale of 94 : 1 : 7 :  
1

|              | f1-score | precision | recall   | support |
|--------------|----------|-----------|----------|---------|
| AFIB         | 0.806349 | 0.810948  | 0.801936 | 204.0   |
| GSVT         | 0.822941 | 0.817005  | 0.828972 | 300.0   |
| SB           | 0.839561 | 0.836495  | 0.842665 | 892.0   |
| SR           | 0.830632 | 0.836086  | 0.825270 | 681.0   |
| macro avg    | 0.824871 | 0.825134  | 0.824711 | 2077.0  |
| micro avg    | 0.830983 | 0.830983  | 0.830983 | 2077.0  |
| weighted avg | 0.830971 | 0.831037  | 0.830983 | 2077.0  |

The result of Model Number:Dataset Number:Featuregroup Number:Rescale of 94 : 1 : 8 :  
0

f1-score precision recall support  
AFIB 0.753522 0.741968 0.765566 875.0  
GSVT 0.779504 0.787145 0.772164 691.0  
SB 0.829600 0.827662 0.831574 1553.0  
SR 0.808877 0.819133 0.798892 907.0  
macro avg 0.792876 0.793977 0.792049 4026.0  
micro avg 0.799668 0.799668 0.799668 4026.0  
weighted avg 0.799799 0.800162 0.799668 4026.0  
The result of Model Number:Dataset Number:Featuregroup Number:Rescale of 94 : 1 : 8 :  
1

f1-score precision recall support  
AFIB 0.825080 0.844879 0.806563 204.0  
GSVT 0.854418 0.849465 0.859531 300.0  
SB 0.872666 0.869464 0.875893 892.0  
SR 0.865082 0.865724 0.864451 681.0  
macro avg 0.854311 0.857383 0.851610 2077.0  
micro avg 0.862969 0.862969 0.862969 2077.0  
weighted avg 0.862870 0.862934 0.862969 2077.0  
The result of Model Number:Dataset Number:Featuregroup Number:Rescale of 94 : 1 : 9 :  
0

f1-score precision recall support  
AFIB 0.839836 0.858089 0.822573 204.0  
GSVT 0.874503 0.869345 0.879748 300.0  
SB 0.893292 0.891310 0.895292 892.0  
SR 0.884336 0.883837 0.884858 681.0  
macro avg 0.872992 0.875645 0.870617 2077.0  
micro avg 0.882483 0.882483 0.882483 2077.0  
weighted avg 0.882391 0.882424 0.882483 2077.0  
The result of Model Number:Dataset Number:Featuregroup Number:Rescale of 94 : 1 : 9 :  
1

f1-score precision recall support  
AFIB 0.772124 0.751840 0.820461 875.0  
GSVT 0.742776 0.703047 0.846749 691.0  
SB 0.703819 0.699371 0.708345 1553.0  
SR 0.683648 0.695427 0.672452 907.0  
macro avg 0.725592 0.712421 0.762002 4026.0  
micro avg 0.748381 0.748381 0.748381 4026.0  
weighted avg 0.720806 0.710517 0.748381 4026.0  
The result of Model Number:Dataset Number:Featuregroup Number:Rescale of 94 : 1 :  
10 : 0

f1-score precision recall support  
AFIB 0.866419 0.865026 0.868172 875.0  
GSVT 0.886621 0.881999 0.891342 691.0  
SB 0.927008 0.919154 0.935004 1553.0

SR 0.891620 0.911443 0.872943 907.0  
macro avg 0.892917 0.894405 0.891865 4026.0  
micro avg 0.899004 0.899004 0.899004 4026.0  
weighted avg 0.898936 0.899276 0.899004 4026.0  
The result of Model Number:Dataset Number:Featuregroup Number:Rescale of 94 : 1 :  
10 : 1

f1-score precision recall support  
AFIB 0.867238 0.897566 0.839292 204.0  
GSVT 0.903863 0.898353 0.909564 300.0  
SB 0.922423 0.918633 0.926248 892.0  
SR 0.913895 0.912563 0.915238 681.0  
macro avg 0.901855 0.906779 0.897585 2077.0  
micro avg 0.911687 0.911687 0.911687 2077.0  
weighted avg 0.911526 0.911644 0.911687 2077.0

The result of Model Number:Dataset Number:Featuregroup Number:Rescale of 95 : 0 : 0 :  
0

f1-score precision recall support  
AFIB 0.876679 0.878436 0.874967 875.0  
GSVT 0.878850 0.874106 0.883670 691.0  
SB 0.918694 0.913786 0.923661 1553.0  
SR 0.896715 0.907349 0.886353 907.0  
macro avg 0.892735 0.893419 0.892163 4026.0  
micro avg 0.897809 0.897809 0.897809 4026.0  
weighted avg 0.897772 0.897842 0.897809 4026.0

The result of Model Number:Dataset Number:Featuregroup Number:Rescale of 95 : 0 : 0 :  
1

f1-score precision recall support  
AFIB 0.692983 0.745076 0.648420 204.0  
GSVT 0.660876 0.681854 0.641252 300.0  
SB 0.688540 0.654468 0.726359 892.0  
SR 0.609512 0.635711 0.585450 681.0  
macro avg 0.662978 0.679277 0.650370 2077.0  
micro avg 0.660211 0.660211 0.660211 2077.0  
weighted avg 0.659069 0.661173 0.660211 2077.0

The result of Model Number:Dataset Number:Featuregroup Number:Rescale of 95 : 0 : 1 :  
0

f1-score precision recall support  
AFIB 0.890981 0.891109 0.890971 875.0  
GSVT 0.906542 0.899028 0.914251 691.0  
SB 0.949138 0.940927 0.957508 1553.0  
SR 0.917861 0.938596 0.898055 907.0  
macro avg 0.916131 0.917415 0.915196 4026.0  
micro avg 0.922229 0.922229 0.922229 4026.0  
weighted avg 0.922141 0.922383 0.922229 4026.0

The result of Model Number:Dataset Number:Featuregroup Number:Rescale of 95 : 0 : 1 :  
1

|              | f1-score | precision | recall   | support |
|--------------|----------|-----------|----------|---------|
| AFIB         | 0.676734 | 0.666358  | 0.687551 | 875.0   |
| GSVT         | 0.700069 | 0.706931  | 0.693477 | 691.0   |
| SB           | 0.745060 | 0.743320  | 0.746832 | 1553.0  |
| SR           | 0.726448 | 0.735659  | 0.717481 | 907.0   |
| macro avg    | 0.712078 | 0.713067  | 0.711335 | 4026.0  |
| micro avg    | 0.718178 | 0.718178  | 0.718178 | 4026.0  |
| weighted avg | 0.718295 | 0.718622  | 0.718178 | 4026.0  |

The result of Model Number:Dataset Number:Featuregroup Number:Rescale of 95 : 0 : 2 :  
0

|              | f1-score | precision | recall   | support |
|--------------|----------|-----------|----------|---------|
| AFIB         | 0.879500 | 0.910033  | 0.851068 | 204.0   |
| GSVT         | 0.896364 | 0.886551  | 0.906506 | 300.0   |
| SB           | 0.920226 | 0.913619  | 0.926932 | 892.0   |
| SR           | 0.903791 | 0.908235  | 0.899407 | 681.0   |
| macro avg    | 0.899970 | 0.904609  | 0.895978 | 2077.0  |
| micro avg    | 0.907505 | 0.907505  | 0.907505 | 2077.0  |
| weighted avg | 0.907391 | 0.907592  | 0.907505 | 2077.0  |

The result of Model Number:Dataset Number:Featuregroup Number:Rescale of 95 : 0 : 2 :  
1

|              | f1-score | precision | recall   | support |
|--------------|----------|-----------|----------|---------|
| AFIB         | 0.745520 | 0.752228  | 0.739165 | 875.0   |
| GSVT         | 0.760707 | 0.745282  | 0.776962 | 691.0   |
| SB           | 0.806734 | 0.797760  | 0.816010 | 1553.0  |
| SR           | 0.774722 | 0.797751  | 0.753167 | 907.0   |
| macro avg    | 0.771921 | 0.773255  | 0.771326 | 4026.0  |
| micro avg    | 0.778449 | 0.778449  | 0.778449 | 4026.0  |
| weighted avg | 0.778318 | 0.778855  | 0.778449 | 4026.0  |

The result of Model Number:Dataset Number:Featuregroup Number:Rescale of 95 : 0 : 3 :  
0

|              | f1-score | precision | recall   | support |
|--------------|----------|-----------|----------|---------|
| AFIB         | 0.816288 | 0.806480  | 0.826366 | 875.0   |
| GSVT         | 0.831987 | 0.838724  | 0.825364 | 691.0   |
| SB           | 0.886834 | 0.883440  | 0.890258 | 1553.0  |
| SR           | 0.866041 | 0.877114  | 0.855254 | 907.0   |
| macro avg    | 0.850287 | 0.851440  | 0.849311 | 4026.0  |
| micro avg    | 0.857348 | 0.857348  | 0.857348 | 4026.0  |
| weighted avg | 0.857404 | 0.857614  | 0.857348 | 4026.0  |

The result of Model Number:Dataset Number:Featuregroup Number:Rescale of 95 : 0 : 3 :  
1

|      | f1-score | precision | recall   | support |
|------|----------|-----------|----------|---------|
| AFIB | 0.777884 | 0.779189  | 0.797164 | 204.0   |



GSVT 0.770571 0.800474 0.743815 300.0  
SB 0.817358 0.772533 0.868039 892.0  
SR 0.708475 0.773857 0.655073 681.0  
macro avg 0.768572 0.781513 0.766023 2077.0  
micro avg 0.773309 0.773309 0.773309 2077.0  
weighted avg 0.771022 0.777657 0.773309 2077.0  
The result of Model Number:Dataset Number:Featuregroup Number:Rescale of 95 : 0 : 4 :  
0

f1-score precision recall support  
AFIB 0.765523 0.829429 0.712287 204.0  
GSVT 0.821113 0.810788 0.832039 300.0  
SB 0.842075 0.830277 0.854310 892.0  
SR 0.819104 0.822941 0.815702 681.0  
macro avg 0.811954 0.823359 0.803584 2077.0  
micro avg 0.824485 0.824485 0.824485 2077.0  
weighted avg 0.823997 0.824974 0.824485 2077.0  
The result of Model Number:Dataset Number:Featuregroup Number:Rescale of 95 : 0 : 4 :  
1

f1-score precision recall support  
AFIB 0.776251 0.792533 0.760645 204.0  
GSVT 0.794258 0.789559 0.799022 300.0  
SB 0.813622 0.811716 0.815537 892.0  
SR 0.806749 0.806517 0.806989 681.0  
macro avg 0.797720 0.800081 0.795548 2077.0  
micro avg 0.804957 0.804957 0.804957 2077.0  
weighted avg 0.804901 0.804927 0.804957 2077.0  
The result of Model Number:Dataset Number:Featuregroup Number:Rescale of 95 : 0 : 5 :  
0

f1-score precision recall support  
AFIB 0.657246 0.661674 0.652974 875.0  
GSVT 0.668975 0.659683 0.678655 691.0  
SB 0.712866 0.707985 0.717821 1553.0  
SR 0.683978 0.695792 0.672595 907.0  
macro avg 0.680766 0.681284 0.680511 4026.0  
micro avg 0.686816 0.686816 0.686816 4026.0  
weighted avg 0.686736 0.686883 0.686816 4026.0  
The result of Model Number:Dataset Number:Featuregroup Number:Rescale of 95 : 0 : 5 :  
1

f1-score precision recall support  
AFIB 0.724693 0.743843 0.706575 204.0  
GSVT 0.744567 0.738382 0.750993 300.0  
SB 0.765084 0.762276 0.767914 892.0  
SR 0.753238 0.754151 0.752348 681.0  
macro avg 0.746896 0.749663 0.744458 2077.0

micro avg 0.754342 0.754342 0.754342 2077.0  
weighted avg 0.754269 0.754350 0.754342 2077.0  
The result of Model Number:Dataset Number:Featuregroup Number:Rescale of 95 : 0 : 6 :  
0

f1-score precision recall support  
AFIB 0.735220 0.727096 0.743542 875.0  
GSVT 0.748466 0.753075 0.743927 691.0  
SB 0.796599 0.795273 0.797933 1553.0  
SR 0.777202 0.784470 0.770088 907.0  
macro avg 0.764372 0.764979 0.763872 4026.0  
micro avg 0.770569 0.770569 0.770569 4026.0  
weighted avg 0.770628 0.770779 0.770569 4026.0

The result of Model Number:Dataset Number:Featuregroup Number:Rescale of 95 : 0 : 6 :  
1

f1-score precision recall support  
AFIB 0.731699 0.723029 0.740642 875.0  
GSVT 0.742113 0.749288 0.735148 691.0  
SB 0.787630 0.784616 0.790672 1553.0  
SR 0.769267 0.778142 0.760614 907.0  
macro avg 0.757677 0.758769 0.756769 4026.0  
micro avg 0.763497 0.763497 0.763497 4026.0  
weighted avg 0.763525 0.763709 0.763497 4026.0

The result of Model Number:Dataset Number:Featuregroup Number:Rescale of 95 : 0 : 7 :  
0

f1-score precision recall support  
AFIB 0.666174 0.649126 0.684202 875.0  
GSVT 0.629740 0.665432 0.597828 691.0  
SB 0.667745 0.614486 0.731129 1553.0  
SR 0.533415 0.647903 0.453409 907.0  
macro avg 0.624268 0.644237 0.616642 4026.0  
micro avg 0.635485 0.635485 0.635485 4026.0  
weighted avg 0.630618 0.638287 0.635485 4026.0

The result of Model Number:Dataset Number:Featuregroup Number:Rescale of 95 : 0 : 7 :  
1

f1-score precision recall support  
AFIB 0.810921 0.817272 0.804711 875.0  
GSVT 0.813060 0.802683 0.823758 691.0  
SB 0.852808 0.849388 0.856265 1553.0  
SR 0.834791 0.842985 0.826785 907.0  
macro avg 0.827895 0.828082 0.827880 4026.0  
micro avg 0.832840 0.832840 0.832840 4026.0  
weighted avg 0.832823 0.832949 0.832840 4026.0

The result of Model Number:Dataset Number:Featuregroup Number:Rescale of 95 : 0 : 8 :  
0

f1-score precision recall support  
AFIB 0.854555 0.861454 0.847839 204.0  
GSVT 0.874163 0.869877 0.878523 300.0  
SB 0.891224 0.890236 0.892223 892.0  
SR 0.884570 0.885746 0.883402 681.0  
macro avg 0.876128 0.876828 0.875497 2077.0  
micro avg 0.882993 0.882993 0.882993 2077.0  
weighted avg 0.882977 0.882996 0.882993 2077.0  
The result of Model Number:Dataset Number:Featuregroup Number:Rescale of 95 : 0 : 8 :  
1

f1-score precision recall support  
AFIB 0.803980 0.866642 0.750141 204.0  
GSVT 0.828497 0.842522 0.814967 300.0  
SB 0.878051 0.869970 0.886311 892.0  
SR 0.843104 0.830878 0.855734 681.0  
macro avg 0.838408 0.852503 0.826788 2077.0  
micro avg 0.852606 0.852606 0.852606 2077.0  
weighted avg 0.852160 0.852861 0.852606 2077.0  
The result of Model Number:Dataset Number:Featuregroup Number:Rescale of 95 : 0 : 9 :  
0

f1-score precision recall support  
AFIB 0.899437 0.912169 0.887793 204.0  
GSVT 0.918111 0.901207 0.935830 300.0  
SB 0.937679 0.927311 0.948296 892.0  
SR 0.917973 0.936670 0.900063 681.0  
macro avg 0.918300 0.919339 0.917996 2077.0  
micro avg 0.924739 0.924739 0.924739 2077.0  
weighted avg 0.924635 0.925122 0.924739 2077.0  
The result of Model Number:Dataset Number:Featuregroup Number:Rescale of 95 : 0 : 9 :  
1

f1-score precision recall support  
AFIB 0.701315 0.736355 0.669811 204.0  
GSVT 0.722458 0.709069 0.736614 300.0  
SB 0.738991 0.731542 0.746609 892.0  
SR 0.718496 0.724914 0.712256 681.0  
macro avg 0.720315 0.725470 0.716323 2077.0  
micro avg 0.726359 0.726359 0.726359 2077.0  
weighted avg 0.726183 0.726596 0.726359 2077.0  
The result of Model Number:Dataset Number:Featuregroup Number:Rescale of 95 : 0 :  
10 : 0

f1-score precision recall support  
AFIB 0.851304 0.869234 0.834234 204.0  
GSVT 0.877772 0.869753 0.885961 300.0  
SB 0.892108 0.890119 0.894109 892.0

SR 0.881506 0.882428 0.880596 681.0  
macro avg 0.875673 0.877884 0.873725 2077.0  
micro avg 0.882621 0.882621 0.882621 2077.0  
weighted avg 0.882554 0.882605 0.882621 2077.0  
The result of Model Number:Dataset Number:Featuregroup Number:Rescale of 95 : 0 :  
10 : 1

f1-score precision recall support  
AFIB 0.754861 0.758602 0.751238 875.0  
GSVT 0.762377 0.763476 0.761398 691.0  
SB 0.802505 0.798782 0.806272 1553.0  
SR 0.787732 0.789705 0.785812 907.0  
macro avg 0.776869 0.777641 0.776180 4026.0  
micro avg 0.782000 0.782000 0.782000 4026.0  
weighted avg 0.781935 0.781944 0.782000 4026.0

The result of Model Number:Dataset Number:Featuregroup Number:Rescale of 95 : 1 : 0 :  
0

f1-score precision recall support  
AFIB 0.830504 0.876024 0.790032 204.0  
GSVT 0.790816 0.818542 0.765004 300.0  
SB 0.813432 0.782059 0.847441 892.0  
SR 0.723976 0.743618 0.705387 681.0  
macro avg 0.789682 0.805061 0.776966 2077.0  
micro avg 0.783319 0.783319 0.783319 2077.0  
weighted avg 0.782512 0.783954 0.783319 2077.0

The result of Model Number:Dataset Number:Featuregroup Number:Rescale of 95 : 1 : 0 :  
1

f1-score precision recall support  
AFIB 0.718606 0.724599 0.712958 204.0  
GSVT 0.737589 0.734192 0.741033 300.0  
SB 0.748712 0.746053 0.751396 892.0  
SR 0.741797 0.745120 0.738543 681.0  
macro avg 0.736676 0.737491 0.735982 2077.0  
micro avg 0.741910 0.741910 0.741910 2077.0  
weighted avg 0.741881 0.741927 0.741910 2077.0

The result of Model Number:Dataset Number:Featuregroup Number:Rescale of 95 : 1 : 1 :  
0

f1-score precision recall support  
AFIB 0.679601 0.685873 0.673480 875.0  
GSVT 0.695470 0.693593 0.697382 691.0  
SB 0.740686 0.733723 0.747788 1553.0  
SR 0.720221 0.727448 0.713151 907.0  
macro avg 0.708994 0.710159 0.707950 4026.0  
micro avg 0.715184 0.715184 0.715184 4026.0  
weighted avg 0.715039 0.715022 0.715184 4026.0

The result of Model Number:Dataset Number:Featuregroup Number:Rescale of 95 : 1 : 1 : 1

|              | f1-score | precision | recall   | support |
|--------------|----------|-----------|----------|---------|
| AFIB         | 0.852704 | 0.851051  | 0.854474 | 875.0   |
| GSVT         | 0.868716 | 0.853517  | 0.884550 | 691.0   |
| SB           | 0.930641 | 0.917436  | 0.944240 | 1553.0  |
| SR           | 0.881562 | 0.920861  | 0.845518 | 907.0   |
| macro avg    | 0.883406 | 0.885716  | 0.882196 | 4026.0  |
| micro avg    | 0.892245 | 0.892245  | 0.892245 | 4026.0  |
| weighted avg | 0.892017 | 0.892809  | 0.892245 | 4026.0  |

The result of Model Number:Dataset Number:Featuregroup Number:Rescale of 95 : 1 : 2 : 0

|              | f1-score | precision | recall   | support |
|--------------|----------|-----------|----------|---------|
| AFIB         | 0.664908 | 0.649411  | 0.681269 | 875.0   |
| GSVT         | 0.638288 | 0.645304  | 0.631465 | 691.0   |
| SB           | 0.671696 | 0.628322  | 0.721518 | 1553.0  |
| SR           | 0.537588 | 0.645539  | 0.460856 | 907.0   |
| macro avg    | 0.628120 | 0.642144  | 0.623777 | 4026.0  |
| micro avg    | 0.638591 | 0.638591  | 0.638591 | 4026.0  |
| weighted avg | 0.634274 | 0.639699  | 0.638591 | 4026.0  |

The result of Model Number:Dataset Number:Featuregroup Number:Rescale of 95 : 1 : 2 : 1

|              | f1-score | precision | recall   | support |
|--------------|----------|-----------|----------|---------|
| AFIB         | 0.855941 | 0.870802  | 0.841687 | 204.0   |
| GSVT         | 0.872808 | 0.870225  | 0.875424 | 300.0   |
| SB           | 0.883100 | 0.879958  | 0.886268 | 892.0   |
| SR           | 0.875920 | 0.876835  | 0.875027 | 681.0   |
| macro avg    | 0.871942 | 0.874455  | 0.869602 | 2077.0  |
| micro avg    | 0.876638 | 0.876638  | 0.876638 | 2077.0  |
| weighted avg | 0.876592 | 0.876629  | 0.876638 | 2077.0  |

The result of Model Number:Dataset Number:Featuregroup Number:Rescale of 95 : 1 : 3 : 0

|              | f1-score | precision | recall   | support |
|--------------|----------|-----------|----------|---------|
| AFIB         | 0.579517 | 0.570239  | 0.652074 | 204.0   |
| GSVT         | 0.678461 | 0.670589  | 0.686768 | 300.0   |
| SB           | 0.701179 | 0.698531  | 0.703851 | 892.0   |
| SR           | 0.550158 | 0.553002  | 0.547436 | 681.0   |
| macro avg    | 0.627329 | 0.623090  | 0.647532 | 2077.0  |
| micro avg    | 0.645013 | 0.645013  | 0.645013 | 2077.0  |
| weighted avg | 0.636432 | 0.634179  | 0.645013 | 2077.0  |

The result of Model Number:Dataset Number:Featuregroup Number:Rescale of 95 : 1 : 3 : 1

|      | f1-score | precision | recall   | support |
|------|----------|-----------|----------|---------|
| AFIB | 0.775892 | 0.764209  | 0.794397 | 875.0   |

GSVT 0.740837 0.738680 0.747156 691.0  
SB 0.791118 0.737196 0.860130 1553.0  
SR 0.586030 0.783349 0.485597 907.0  
macro avg 0.723469 0.755858 0.721820 4026.0  
micro avg 0.742077 0.742077 0.742077 4026.0  
weighted avg 0.732976 0.753719 0.742077 4026.0  
The result of Model Number:Dataset Number:Featuregroup Number:Rescale of 95 : 1 : 4 :  
0

f1-score precision recall support  
AFIB 0.679422 0.681199 0.677787 204.0  
GSVT 0.694751 0.692061 0.697520 300.0  
SB 0.710332 0.709384 0.711286 892.0  
SR 0.704643 0.706623 0.702677 681.0  
macro avg 0.697287 0.697317 0.697318 2077.0  
micro avg 0.703185 0.703185 0.703185 2077.0  
weighted avg 0.703180 0.703208 0.703185 2077.0  
The result of Model Number:Dataset Number:Featuregroup Number:Rescale of 95 : 1 : 4 :  
1

f1-score precision recall support  
AFIB 0.819645 0.836159 0.804297 204.0  
GSVT 0.845945 0.839151 0.853013 300.0  
SB 0.864259 0.863389 0.865131 892.0  
SR 0.856381 0.855889 0.856883 681.0  
macro avg 0.846558 0.848647 0.844831 2077.0  
micro avg 0.854702 0.854702 0.854702 2077.0  
weighted avg 0.854649 0.854755 0.854702 2077.0  
The result of Model Number:Dataset Number:Featuregroup Number:Rescale of 95 : 1 : 5 :  
0

f1-score precision recall support  
AFIB 0.873292 0.911617 0.838278 204.0  
GSVT 0.812978 0.818831 0.807541 300.0  
SB 0.843122 0.800783 0.890191 892.0  
SR 0.747981 0.797367 0.704515 681.0  
macro avg 0.819343 0.832149 0.810131 2077.0  
micro avg 0.812275 0.812275 0.812275 2077.0  
weighted avg 0.810537 0.813156 0.812275 2077.0  
The result of Model Number:Dataset Number:Featuregroup Number:Rescale of 95 : 1 : 5 :  
1

f1-score precision recall support  
AFIB 0.614696 0.629172 0.600924 875.0  
GSVT 0.647981 0.649617 0.646395 691.0  
SB 0.704691 0.701769 0.707639 1553.0  
SR 0.670518 0.659958 0.681453 907.0  
macro avg 0.659471 0.660129 0.659103 4026.0

micro avg 0.668035 0.668035 0.668035 4026.0  
weighted avg 0.667699 0.667621 0.668035 4026.0  
The result of Model Number:Dataset Number:Featuregroup Number:Rescale of 95 : 1 : 6 :  
0

|              | f1-score | precision | recall   | support |
|--------------|----------|-----------|----------|---------|
| AFIB         | 0.726313 | 0.732070  | 0.720664 | 875.0   |
| GSVT         | 0.735521 | 0.732279  | 0.738818 | 691.0   |
| SB           | 0.782140 | 0.779048  | 0.785263 | 1553.0  |
| SR           | 0.762920 | 0.765076  | 0.760814 | 907.0   |
| macro avg    | 0.751724 | 0.752118  | 0.751390 | 4026.0  |
| micro avg    | 0.757743 | 0.757743  | 0.757743 | 4026.0  |
| weighted avg | 0.757676 | 0.757663  | 0.757743 | 4026.0  |

The result of Model Number:Dataset Number:Featuregroup Number:Rescale of 95 : 1 : 6 :  
1

|              | f1-score | precision | recall   | support |
|--------------|----------|-----------|----------|---------|
| AFIB         | 0.873033 | 0.892481  | 0.854665 | 204.0   |
| GSVT         | 0.883804 | 0.870859  | 0.897507 | 300.0   |
| SB           | 0.903775 | 0.894794  | 0.912979 | 892.0   |
| SR           | 0.887104 | 0.899846  | 0.874745 | 681.0   |
| macro avg    | 0.886929 | 0.889495  | 0.884974 | 2077.0  |
| micro avg    | 0.892481 | 0.892481  | 0.892481 | 2077.0  |
| weighted avg | 0.892405 | 0.892766  | 0.892481 | 2077.0  |

The result of Model Number:Dataset Number:Featuregroup Number:Rescale of 95 : 1 : 7 :  
0

|              | f1-score | precision | recall   | support |
|--------------|----------|-----------|----------|---------|
| AFIB         | 0.603883 | 0.668955  | 0.550833 | 204.0   |
| GSVT         | 0.711820 | 0.701843  | 0.722269 | 300.0   |
| SB           | 0.755781 | 0.753347  | 0.758238 | 892.0   |
| SR           | 0.736431 | 0.725229  | 0.748003 | 681.0   |
| macro avg    | 0.701979 | 0.712344  | 0.694835 | 2077.0  |
| micro avg    | 0.729315 | 0.729315  | 0.729315 | 2077.0  |
| weighted avg | 0.728167 | 0.728400  | 0.729315 | 2077.0  |

The result of Model Number:Dataset Number:Featuregroup Number:Rescale of 95 : 1 : 7 :  
1

|              | f1-score | precision | recall   | support |
|--------------|----------|-----------|----------|---------|
| AFIB         | 0.710314 | 0.713580  | 0.707114 | 875.0   |
| GSVT         | 0.680790 | 0.684891  | 0.676760 | 691.0   |
| SB           | 0.730258 | 0.697707  | 0.766031 | 1553.0  |
| SR           | 0.624531 | 0.679883  | 0.577638 | 907.0   |
| macro avg    | 0.686473 | 0.694015  | 0.681886 | 4026.0  |
| micro avg    | 0.695462 | 0.695462  | 0.695462 | 4026.0  |
| weighted avg | 0.693614 | 0.694942  | 0.695462 | 4026.0  |

The result of Model Number:Dataset Number:Featuregroup Number:Rescale of 95 : 1 : 8 :  
0

f1-score precision recall support  
AFIB 0.684691 0.691692 0.677888 875.0  
GSVT 0.684485 0.673911 0.695477 691.0  
SB 0.722040 0.717729 0.726410 1553.0  
SR 0.702929 0.712338 0.693787 907.0  
macro avg 0.698537 0.698917 0.698391 4026.0  
micro avg 0.703206 0.703206 0.703206 4026.0  
weighted avg 0.703172 0.703335 0.703206 4026.0  
The result of Model Number:Dataset Number:Featuregroup Number:Rescale of 95 : 1 : 8 :  
1

f1-score precision recall support  
AFIB 0.713686 0.731051 0.697303 204.0  
GSVT 0.722657 0.712709 0.732984 300.0  
SB 0.737249 0.729887 0.744767 892.0  
SR 0.724377 0.733883 0.715135 681.0  
macro avg 0.724492 0.726882 0.722547 2077.0  
micro avg 0.728688 0.728688 0.728688 2077.0  
weighted avg 0.728607 0.728830 0.728688 2077.0  
The result of Model Number:Dataset Number:Featuregroup Number:Rescale of 95 : 1 : 9 :  
0

f1-score precision recall support  
AFIB 0.699922 0.690227 0.709921 875.0  
GSVT 0.715445 0.721235 0.709751 691.0  
SB 0.759437 0.757254 0.761636 1553.0  
SR 0.740962 0.750606 0.731570 907.0  
macro avg 0.728941 0.729831 0.728219 4026.0  
micro avg 0.734718 0.734718 0.734718 4026.0  
weighted avg 0.734789 0.735007 0.734718 4026.0  
The result of Model Number:Dataset Number:Featuregroup Number:Rescale of 95 : 1 : 9 :  
1

f1-score precision recall support  
AFIB 0.637913 0.634718 0.641350 875.0  
GSVT 0.652326 0.653208 0.651577 691.0  
SB 0.694638 0.692350 0.696959 1553.0  
SR 0.674238 0.681236 0.667462 907.0  
macro avg 0.664779 0.665378 0.664337 4026.0  
micro avg 0.670439 0.670439 0.670439 4026.0  
weighted avg 0.670451 0.670603 0.670439 4026.0  
The result of Model Number:Dataset Number:Featuregroup Number:Rescale of 95 : 1 :  
10 : 0

f1-score precision recall support  
AFIB 0.784972 0.793950 0.776498 204.0  
GSVT 0.803345 0.798592 0.808169 300.0  
SB 0.771197 0.742710 0.819282 892.0



SR 0.646912 0.650043 0.643828 681.0  
macro avg 0.751607 0.746324 0.761944 2077.0  
micro avg 0.755947 0.755947 0.755947 2077.0  
weighted avg 0.736443 0.725431 0.755947 2077.0  
The result of Model Number:Dataset Number:Featuregroup Number:Rescale of 95 : 1 :  
10 : 1

f1-score precision recall support  
AFIB 0.924876 0.940252 0.910206 204.0  
GSVT 0.942610 0.935913 0.949474 300.0  
SB 0.964473 0.959053 0.969977 892.0  
SR 0.952186 0.958012 0.946461 681.0  
macro avg 0.946036 0.948307 0.944030 2077.0  
micro avg 0.953435 0.953435 0.953435 2077.0  
weighted avg 0.953398 0.953523 0.953435 2077.0

The result of Model Number:Dataset Number:Featuregroup Number:Rescale of 96 : 0 : 0 :  
0

f1-score precision recall support  
AFIB 0.763214 0.755861 0.770829 875.0  
GSVT 0.783210 0.785451 0.781064 691.0  
SB 0.832687 0.830772 0.834617 1553.0  
SR 0.809263 0.818786 0.799978 907.0  
macro avg 0.797094 0.797717 0.796622 4026.0  
micro avg 0.803758 0.803758 0.803758 4026.0  
weighted avg 0.803819 0.804012 0.803758 4026.0

The result of Model Number:Dataset Number:Featuregroup Number:Rescale of 96 : 0 : 0 :  
1

f1-score precision recall support  
AFIB 0.864625 0.862228 0.867099 875.0  
GSVT 0.871467 0.875623 0.867437 691.0  
SB 0.912273 0.909358 0.915210 1553.0  
SR 0.897688 0.902024 0.893435 907.0  
macro avg 0.886513 0.887308 0.885795 4026.0  
micro avg 0.891649 0.891649 0.891649 4026.0  
weighted avg 0.891628 0.891673 0.891649 4026.0

The result of Model Number:Dataset Number:Featuregroup Number:Rescale of 96 : 0 : 1 :  
0

f1-score precision recall support  
AFIB 0.730815 0.741774 0.720382 204.0  
GSVT 0.757205 0.755195 0.759231 300.0  
SB 0.775142 0.774109 0.776184 892.0  
SR 0.767561 0.766571 0.768578 681.0  
macro avg 0.757681 0.759412 0.756094 2077.0  
micro avg 0.765761 0.765761 0.765761 2077.0  
weighted avg 0.765712 0.765730 0.765761 2077.0

The result of Model Number:Dataset Number:Featuregroup Number:Rescale of 96 : 0 : 1 : 1

|              | f1-score | precision | recall   | support |
|--------------|----------|-----------|----------|---------|
| AFIB         | 0.745600 | 0.759525  | 0.825493 | 204.0   |
| GSVT         | 0.895388 | 0.877249  | 0.914745 | 300.0   |
| SB           | 0.736588 | 0.729706  | 0.743609 | 892.0   |
| SR           | 0.896530 | 0.904019  | 0.889288 | 681.0   |
| macro avg    | 0.818526 | 0.817625  | 0.843284 | 2077.0  |
| micro avg    | 0.824135 | 0.824135  | 0.824135 | 2077.0  |
| weighted avg | 0.812851 | 0.811099  | 0.824135 | 2077.0  |

The result of Model Number:Dataset Number:Featuregroup Number:Rescale of 96 : 0 : 2 : 0

|              | f1-score | precision | recall   | support |
|--------------|----------|-----------|----------|---------|
| AFIB         | 0.836837 | 0.814854  | 0.889225 | 875.0   |
| GSVT         | 0.805029 | 0.761970  | 0.917717 | 691.0   |
| SB           | 0.762807 | 0.757986  | 0.767712 | 1553.0  |
| SR           | 0.740946 | 0.753713  | 0.728812 | 907.0   |
| macro avg    | 0.786405 | 0.772131  | 0.825867 | 4026.0  |
| micro avg    | 0.811104 | 0.811104  | 0.811104 | 4026.0  |
| weighted avg | 0.781218 | 0.770067  | 0.811104 | 4026.0  |

The result of Model Number:Dataset Number:Featuregroup Number:Rescale of 96 : 0 : 2 : 1

|              | f1-score | precision | recall   | support |
|--------------|----------|-----------|----------|---------|
| AFIB         | 0.812709 | 0.876052  | 0.758286 | 204.0   |
| GSVT         | 0.837493 | 0.851670  | 0.823816 | 300.0   |
| SB           | 0.887585 | 0.879416  | 0.895934 | 892.0   |
| SR           | 0.852258 | 0.839899  | 0.865025 | 681.0   |
| macro avg    | 0.847511 | 0.861759  | 0.835765 | 2077.0  |
| micro avg    | 0.861864 | 0.861864  | 0.861864 | 2077.0  |
| weighted avg | 0.861412 | 0.862121  | 0.861864 | 2077.0  |

The result of Model Number:Dataset Number:Featuregroup Number:Rescale of 96 : 0 : 3 : 0

|              | f1-score | precision | recall   | support |
|--------------|----------|-----------|----------|---------|
| AFIB         | 0.881065 | 0.872577  | 0.889856 | 875.0   |
| GSVT         | 0.904149 | 0.906735  | 0.901671 | 691.0   |
| SB           | 0.961266 | 0.959055  | 0.963493 | 1553.0  |
| SR           | 0.934225 | 0.945217  | 0.923505 | 907.0   |
| macro avg    | 0.920176 | 0.920896  | 0.919631 | 4026.0  |
| micro avg    | 0.927870 | 0.927870  | 0.927870 | 4026.0  |
| weighted avg | 0.927940 | 0.928163  | 0.927870 | 4026.0  |

The result of Model Number:Dataset Number:Featuregroup Number:Rescale of 96 : 0 : 3 : 1

|      | f1-score | precision | recall   | support |
|------|----------|-----------|----------|---------|
| AFIB | 0.865326 | 0.866299  | 0.864512 | 204.0   |

GSVT 0.885192 0.883216 0.887245 300.0  
SB 0.903955 0.902748 0.905169 892.0  
SR 0.897185 0.899444 0.894948 681.0  
macro avg 0.887914 0.887927 0.887968 2077.0  
micro avg 0.895236 0.895236 0.895236 2077.0  
weighted avg 0.895231 0.895264 0.895236 2077.0  
The result of Model Number:Dataset Number:Featuregroup Number:Rescale of 96 : 0 : 4 :  
0

f1-score precision recall support  
AFIB 0.667623 0.659099 0.676409 875.0  
GSVT 0.679341 0.683237 0.675508 691.0  
SB 0.727193 0.724139 0.730280 1553.0  
SR 0.705781 0.717205 0.694728 907.0  
macro avg 0.694985 0.695920 0.694231 4026.0  
micro avg 0.701162 0.701162 0.701162 4026.0  
weighted avg 0.701210 0.701421 0.701162 4026.0  
The result of Model Number:Dataset Number:Featuregroup Number:Rescale of 96 : 0 : 4 :  
1

f1-score precision recall support  
AFIB 0.826489 0.823947 0.829099 875.0  
GSVT 0.805420 0.809370 0.801637 691.0  
SB 0.846723 0.811585 0.885049 1553.0  
SR 0.728675 0.795026 0.672604 907.0  
macro avg 0.801827 0.809982 0.797097 4026.0  
micro avg 0.810712 0.810712 0.810712 4026.0  
weighted avg 0.808642 0.810161 0.810712 4026.0  
The result of Model Number:Dataset Number:Featuregroup Number:Rescale of 96 : 0 : 5 :  
0

f1-score precision recall support  
AFIB 0.837608 0.837389 0.837909 875.0  
GSVT 0.855106 0.851873 0.858455 691.0  
SB 0.910389 0.906279 0.914551 1553.0  
SR 0.879707 0.889758 0.869915 907.0  
macro avg 0.870703 0.871325 0.870207 4026.0  
micro avg 0.878210 0.878210 0.878210 4026.0  
weighted avg 0.878171 0.878247 0.878210 4026.0  
The result of Model Number:Dataset Number:Featuregroup Number:Rescale of 96 : 0 : 5 :  
1

f1-score precision recall support  
AFIB 0.785696 0.811788 0.761527 204.0  
GSVT 0.815513 0.808971 0.822285 300.0  
SB 0.833531 0.830106 0.836987 892.0  
SR 0.825746 0.825625 0.825868 681.0  
macro avg 0.815121 0.819122 0.811667 2077.0

micro avg 0.823806 0.823806 0.823806 2077.0  
weighted avg 0.823678 0.823785 0.823806 2077.0  
The result of Model Number:Dataset Number:Featuregroup Number:Rescale of 96 : 0 : 6 :  
0

|              | f1-score | precision | recall   | support |
|--------------|----------|-----------|----------|---------|
| AFIB         | 0.881772 | 0.885971  | 0.877652 | 875.0   |
| GSVT         | 0.892665 | 0.876442  | 0.909591 | 691.0   |
| SB           | 0.944507 | 0.940890  | 0.948155 | 1553.0  |
| SR           | 0.916590 | 0.932279  | 0.901435 | 907.0   |
| macro avg    | 0.908883 | 0.908896  | 0.909208 | 4026.0  |
| micro avg    | 0.915688 | 0.915688  | 0.915688 | 4026.0  |
| weighted avg | 0.915685 | 0.915953  | 0.915688 | 4026.0  |

The result of Model Number:Dataset Number:Featuregroup Number:Rescale of 96 : 0 : 6 :  
1

|              | f1-score | precision | recall   | support |
|--------------|----------|-----------|----------|---------|
| AFIB         | 0.809755 | 0.811811  | 0.807740 | 875.0   |
| GSVT         | 0.824045 | 0.815118  | 0.833203 | 691.0   |
| SB           | 0.868498 | 0.858674  | 0.878563 | 1553.0  |
| SR           | 0.828789 | 0.851479  | 0.807310 | 907.0   |
| macro avg    | 0.832772 | 0.834270  | 0.831704 | 4026.0  |
| micro avg    | 0.839333 | 0.839333  | 0.839333 | 4026.0  |
| weighted avg | 0.839155 | 0.839392  | 0.839333 | 4026.0  |

The result of Model Number:Dataset Number:Featuregroup Number:Rescale of 96 : 0 : 7 :  
0

|              | f1-score | precision | recall   | support |
|--------------|----------|-----------|----------|---------|
| AFIB         | 0.799948 | 0.801334  | 0.798579 | 875.0   |
| GSVT         | 0.809647 | 0.800344  | 0.819236 | 691.0   |
| SB           | 0.852587 | 0.842306  | 0.863125 | 1553.0  |
| SR           | 0.812061 | 0.836666  | 0.788880 | 907.0   |
| macro avg    | 0.818561 | 0.820163  | 0.817455 | 4026.0  |
| micro avg    | 0.824837 | 0.824837  | 0.824837 | 4026.0  |
| weighted avg | 0.824647 | 0.824929  | 0.824837 | 4026.0  |

The result of Model Number:Dataset Number:Featuregroup Number:Rescale of 96 : 0 : 7 :  
1

|              | f1-score | precision | recall   | support |
|--------------|----------|-----------|----------|---------|
| AFIB         | 0.777829 | 0.761120  | 0.795331 | 875.0   |
| GSVT         | 0.805524 | 0.817206  | 0.794225 | 691.0   |
| SB           | 0.857512 | 0.857349  | 0.857679 | 1553.0  |
| SR           | 0.836020 | 0.845737  | 0.826528 | 907.0   |
| macro avg    | 0.819221 | 0.820353  | 0.818441 | 4026.0  |
| micro avg    | 0.826220 | 0.826220  | 0.826220 | 4026.0  |
| weighted avg | 0.826429 | 0.826929  | 0.826220 | 4026.0  |

The result of Model Number:Dataset Number:Featuregroup Number:Rescale of 96 : 0 : 8 :  
0

f1-score precision recall support  
AFIB 0.696767 0.698015 0.695545 875.0  
GSVT 0.667201 0.670705 0.663751 691.0  
SB 0.705736 0.666914 0.749364 1553.0  
SR 0.586117 0.659718 0.527342 907.0  
macro avg 0.663955 0.673838 0.659001 4026.0  
micro avg 0.672955 0.672955 0.672955 4026.0  
weighted avg 0.670224 0.672703 0.672955 4026.0  
The result of Model Number:Dataset Number:Featuregroup Number:Rescale of 96 : 0 : 8 :  
1

f1-score precision recall support  
AFIB 0.684200 0.719548 0.652366 204.0  
GSVT 0.717442 0.710430 0.724611 300.0  
SB 0.730092 0.724219 0.736066 892.0  
SR 0.721075 0.721952 0.720228 681.0  
macro avg 0.713202 0.719037 0.708318 2077.0  
micro avg 0.720998 0.720998 0.720998 2077.0  
weighted avg 0.720801 0.721025 0.720998 2077.0  
The result of Model Number:Dataset Number:Featuregroup Number:Rescale of 96 : 0 : 9 :  
0

f1-score precision recall support  
AFIB 0.760400 0.796806 0.727355 204.0  
GSVT 0.800906 0.792332 0.809697 300.0  
SB 0.817918 0.813400 0.822498 892.0  
SR 0.808679 0.807978 0.809395 681.0  
macro avg 0.796976 0.802629 0.792236 2077.0  
micro avg 0.807008 0.807008 0.807008 2077.0  
weighted avg 0.806782 0.806949 0.807008 2077.0  
The result of Model Number:Dataset Number:Featuregroup Number:Rescale of 96 : 0 : 9 :  
1

f1-score precision recall support  
AFIB 0.642257 0.597251 0.754209 875.0  
GSVT 0.550818 0.514266 0.623031 691.0  
SB 0.658192 0.652639 0.663856 1553.0  
SR 0.634402 0.649779 0.619957 907.0  
macro avg 0.621417 0.603484 0.665263 4026.0  
micro avg 0.666596 0.666596 0.666596 4026.0  
weighted avg 0.630940 0.616207 0.666596 4026.0  
The result of Model Number:Dataset Number:Featuregroup Number:Rescale of 96 : 0 :  
10 : 0

f1-score precision recall support  
AFIB 0.770719 0.789027 0.753312 204.0  
GSVT 0.796035 0.788571 0.803725 300.0  
SB 0.813131 0.812221 0.814042 892.0

SR 0.805282 0.804473 0.806106 681.0  
macro avg 0.796292 0.798573 0.794297 2077.0  
micro avg 0.803985 0.803985 0.803985 2077.0  
weighted avg 0.803923 0.803987 0.803985 2077.0  
The result of Model Number:Dataset Number:Featuregroup Number:Rescale of 96 : 0 :  
10 : 1

f1-score precision recall support  
AFIB 0.874611 0.894067 0.856172 204.0  
GSVT 0.911875 0.906208 0.917648 300.0  
SB 0.931669 0.929707 0.933651 892.0  
SR 0.921746 0.921094 0.922428 681.0  
macro avg 0.909975 0.912769 0.907475 2077.0  
micro avg 0.920050 0.920050 0.920050 2077.0  
weighted avg 0.919952 0.919988 0.920050 2077.0  
The result of Model Number:Dataset Number:Featuregroup Number:Rescale of 96 : 1 : 0 :  
0

f1-score precision recall support  
AFIB 0.911986 0.931808 0.893240 204.0  
GSVT 0.949632 0.944031 0.955327 300.0  
SB 0.970035 0.967883 0.972207 892.0  
SR 0.960310 0.959768 0.960877 681.0  
macro avg 0.947991 0.950873 0.945413 2077.0  
micro avg 0.958298 0.958298 0.958298 2077.0  
weighted avg 0.958198 0.958234 0.958298 2077.0  
The result of Model Number:Dataset Number:Featuregroup Number:Rescale of 96 : 1 : 0 :  
1

f1-score precision recall support  
AFIB 0.750568 0.768398 0.733617 204.0  
GSVT 0.775222 0.767954 0.782711 300.0  
SB 0.791871 0.790986 0.792759 892.0  
SR 0.784228 0.783440 0.785030 681.0  
macro avg 0.775473 0.777694 0.773529 2077.0  
micro avg 0.782965 0.782965 0.782965 2077.0  
weighted avg 0.782904 0.782966 0.782965 2077.0  
The result of Model Number:Dataset Number:Featuregroup Number:Rescale of 96 : 1 : 1 :  
0

f1-score precision recall support  
AFIB 0.852053 0.846150 0.858210 875.0  
GSVT 0.865198 0.868709 0.861855 691.0  
SB 0.938742 0.928980 0.948715 1553.0  
SR 0.891344 0.912084 0.871607 907.0  
macro avg 0.886834 0.888981 0.885097 4026.0  
micro avg 0.896765 0.896765 0.896765 4026.0  
weighted avg 0.896600 0.896827 0.896765 4026.0

The result of Model Number:Dataset Number:Featuregroup Number:Rescale of 96 : 1 : 1 :  
1

|              | f1-score | precision | recall   | support |
|--------------|----------|-----------|----------|---------|
| AFIB         | 0.797999 | 0.808566  | 0.787824 | 204.0   |
| GSVT         | 0.822080 | 0.819113  | 0.825087 | 300.0   |
| SB           | 0.832319 | 0.829729  | 0.834930 | 892.0   |
| SR           | 0.823250 | 0.824836  | 0.821694 | 681.0   |
| macro avg    | 0.818912 | 0.820561  | 0.817384 | 2077.0  |
| micro avg    | 0.824542 | 0.824542  | 0.824542 | 2077.0  |
| weighted avg | 0.824496 | 0.824513  | 0.824542 | 2077.0  |

The result of Model Number:Dataset Number:Featuregroup Number:Rescale of 96 : 1 : 2 :  
0

|              | f1-score | precision | recall   | support |
|--------------|----------|-----------|----------|---------|
| AFIB         | 0.907452 | 0.925190  | 0.890540 | 204.0   |
| GSVT         | 0.932387 | 0.925669  | 0.939235 | 300.0   |
| SB           | 0.949074 | 0.945381  | 0.952798 | 892.0   |
| SR           | 0.938700 | 0.941356  | 0.936079 | 681.0   |
| macro avg    | 0.931903 | 0.934399  | 0.929663 | 2077.0  |
| micro avg    | 0.939242 | 0.939242  | 0.939242 | 2077.0  |
| weighted avg | 0.939174 | 0.939231  | 0.939242 | 2077.0  |

The result of Model Number:Dataset Number:Featuregroup Number:Rescale of 96 : 1 : 2 :  
1

|              | f1-score | precision | recall   | support |
|--------------|----------|-----------|----------|---------|
| AFIB         | 0.790853 | 0.791229  | 0.790590 | 875.0   |
| GSVT         | 0.811334 | 0.804312  | 0.818509 | 691.0   |
| SB           | 0.866508 | 0.860193  | 0.872924 | 1553.0  |
| SR           | 0.829490 | 0.845979  | 0.813673 | 907.0   |
| macro avg    | 0.824546 | 0.825428  | 0.823924 | 4026.0  |
| micro avg    | 0.832342 | 0.832342  | 0.832342 | 4026.0  |
| weighted avg | 0.832256 | 0.832411  | 0.832342 | 4026.0  |

The result of Model Number:Dataset Number:Featuregroup Number:Rescale of 96 : 1 : 3 :  
0

|              | f1-score | precision | recall   | support |
|--------------|----------|-----------|----------|---------|
| AFIB         | 0.825631 | 0.828290  | 0.823065 | 875.0   |
| GSVT         | 0.837238 | 0.823946  | 0.851042 | 691.0   |
| SB           | 0.882166 | 0.874801  | 0.889663 | 1553.0  |
| SR           | 0.837822 | 0.859101  | 0.817603 | 907.0   |
| macro avg    | 0.845714 | 0.846534  | 0.845343 | 4026.0  |
| micro avg    | 0.852326 | 0.852326  | 0.852326 | 4026.0  |
| weighted avg | 0.852178 | 0.852427  | 0.852326 | 4026.0  |

The result of Model Number:Dataset Number:Featuregroup Number:Rescale of 96 : 1 : 3 :  
1

|      | f1-score | precision | recall   | support |
|------|----------|-----------|----------|---------|
| AFIB | 0.712252 | 0.800864  | 0.641923 | 204.0   |

GSVT 0.845035 0.826990 0.863922 300.0  
SB 0.902091 0.897492 0.906741 892.0  
SR 0.881853 0.870685 0.893367 681.0  
macro avg 0.835308 0.849008 0.826488 2077.0  
micro avg 0.870161 0.870161 0.870161 2077.0  
weighted avg 0.868568 0.869029 0.870161 2077.0  
The result of Model Number:Dataset Number:Featuregroup Number:Rescale of 96 : 1 : 4 :  
0

f1-score precision recall support  
AFIB 0.784563 0.775309 0.794080 875.0  
GSVT 0.797854 0.802902 0.792897 691.0  
SB 0.850666 0.849522 0.851816 1553.0  
SR 0.829768 0.837629 0.822081 907.0  
macro avg 0.815713 0.816340 0.815219 4026.0  
micro avg 0.822456 0.822456 0.822456 4026.0  
weighted avg 0.822527 0.822712 0.822456 4026.0  
The result of Model Number:Dataset Number:Featuregroup Number:Rescale of 96 : 1 : 4 :  
1

f1-score precision recall support  
AFIB 0.815021 0.822451 0.807831 204.0  
GSVT 0.836290 0.833552 0.839072 300.0  
SB 0.851578 0.851010 0.852150 892.0  
SR 0.844089 0.843846 0.844343 681.0  
macro avg 0.836744 0.837715 0.835849 2077.0  
micro avg 0.843348 0.843348 0.843348 2077.0  
weighted avg 0.843324 0.843335 0.843348 2077.0  
The result of Model Number:Dataset Number:Featuregroup Number:Rescale of 96 : 1 : 5 :  
0

f1-score precision recall support  
AFIB 0.704341 0.704298 0.704428 875.0  
GSVT 0.705866 0.702049 0.709736 691.0  
SB 0.739587 0.734666 0.744585 1553.0  
SR 0.719949 0.731761 0.708539 907.0  
macro avg 0.717436 0.718194 0.716822 4026.0  
micro avg 0.721755 0.721755 0.721755 4026.0  
weighted avg 0.721715 0.721814 0.721755 4026.0  
The result of Model Number:Dataset Number:Featuregroup Number:Rescale of 96 : 1 : 5 :  
1

f1-score precision recall support  
AFIB 0.910168 0.934768 0.887018 204.0  
GSVT 0.917670 0.904161 0.931714 300.0  
SB 0.935446 0.925494 0.945617 892.0  
SR 0.918096 0.930711 0.905833 681.0  
macro avg 0.920345 0.923784 0.917546 2077.0



micro avg 0.924809 0.924809 0.924809 2077.0  
weighted avg 0.924707 0.925034 0.924809 2077.0  
The result of Model Number:Dataset Number:Featuregroup Number:Rescale of 96 : 1 : 6 :  
0

|              | f1-score | precision | recall   | support |
|--------------|----------|-----------|----------|---------|
| AFIB         | 0.739505 | 0.755749  | 0.724222 | 204.0   |
| GSVT         | 0.763338 | 0.757168  | 0.769713 | 300.0   |
| SB           | 0.779336 | 0.778377  | 0.780297 | 892.0   |
| SR           | 0.772757 | 0.772084  | 0.773435 | 681.0   |
| macro avg    | 0.763734 | 0.765845  | 0.761917 | 2077.0  |
| micro avg    | 0.771011 | 0.771011  | 0.771011 | 2077.0  |
| weighted avg | 0.770956 | 0.771028  | 0.771011 | 2077.0  |

The result of Model Number:Dataset Number:Featuregroup Number:Rescale of 96 : 1 : 6 :  
1

|              | f1-score | precision | recall   | support |
|--------------|----------|-----------|----------|---------|
| AFIB         | 0.735810 | 0.751244  | 0.721017 | 204.0   |
| GSVT         | 0.752879 | 0.748424  | 0.757394 | 300.0   |
| SB           | 0.771233 | 0.769427  | 0.773049 | 892.0   |
| SR           | 0.764719 | 0.764499  | 0.764946 | 681.0   |
| macro avg    | 0.756160 | 0.758399  | 0.754102 | 2077.0  |
| micro avg    | 0.763021 | 0.763021  | 0.763021 | 2077.0  |
| weighted avg | 0.762967 | 0.762992  | 0.763021 | 2077.0  |

The result of Model Number:Dataset Number:Featuregroup Number:Rescale of 96 : 1 : 7 :  
0

|              | f1-score | precision | recall   | support |
|--------------|----------|-----------|----------|---------|
| AFIB         | 0.768290 | 0.768836  | 0.767760 | 875.0   |
| GSVT         | 0.778643 | 0.780179  | 0.777181 | 691.0   |
| SB           | 0.827050 | 0.824301  | 0.829819 | 1553.0  |
| SR           | 0.807616 | 0.810619  | 0.804663 | 907.0   |
| macro avg    | 0.795400 | 0.795984  | 0.794856 | 4026.0  |
| micro avg    | 0.801630 | 0.801630  | 0.801630 | 4026.0  |
| weighted avg | 0.801593 | 0.801591  | 0.801630 | 4026.0  |

The result of Model Number:Dataset Number:Featuregroup Number:Rescale of 96 : 1 : 7 :  
1

|              | f1-score | precision | recall   | support |
|--------------|----------|-----------|----------|---------|
| AFIB         | 0.856343 | 0.840335  | 0.873064 | 875.0   |
| GSVT         | 0.886339 | 0.900332  | 0.872885 | 691.0   |
| SB           | 0.942584 | 0.940899  | 0.944282 | 1553.0  |
| SR           | 0.918625 | 0.928357  | 0.909100 | 907.0   |
| macro avg    | 0.900973 | 0.902481  | 0.899833 | 4026.0  |
| micro avg    | 0.908624 | 0.908624  | 0.908624 | 4026.0  |
| weighted avg | 0.908789 | 0.909255  | 0.908624 | 4026.0  |

The result of Model Number:Dataset Number:Featuregroup Number:Rescale of 96 : 1 : 8 :  
0

f1-score precision recall support  
AFIB 0.832648 0.852258 0.813993 875.0  
GSVT 0.877735 0.879952 0.875587 691.0  
SB 0.954553 0.950595 0.958546 1553.0  
SR 0.908263 0.893959 0.923076 907.0  
macro avg 0.893300 0.894191 0.892801 4026.0  
micro avg 0.904900 0.904900 0.904900 4026.0  
weighted avg 0.904445 0.904339 0.904900 4026.0  
The result of Model Number:Dataset Number:Featuregroup Number:Rescale of 96 : 1 : 8 :  
1

f1-score precision recall support  
AFIB 0.828524 0.833250 0.823990 204.0  
GSVT 0.845572 0.839473 0.851769 300.0  
SB 0.862649 0.859499 0.865839 892.0  
SR 0.853475 0.859079 0.847965 681.0  
macro avg 0.847555 0.847825 0.847391 2077.0  
micro avg 0.853836 0.853836 0.853836 2077.0  
weighted avg 0.853823 0.853890 0.853836 2077.0  
The result of Model Number:Dataset Number:Featuregroup Number:Rescale of 96 : 1 : 9 :  
0

f1-score precision recall support  
AFIB 0.761796 0.801906 0.725711 204.0  
GSVT 0.800050 0.793042 0.807218 300.0  
SB 0.820810 0.815743 0.825955 892.0  
SR 0.809611 0.807969 0.811279 681.0  
macro avg 0.798067 0.804665 0.792541 2077.0  
micro avg 0.808591 0.808591 0.808591 2077.0  
weighted avg 0.808343 0.808556 0.808591 2077.0  
The result of Model Number:Dataset Number:Featuregroup Number:Rescale of 96 : 1 : 9 :  
1

f1-score precision recall support  
AFIB 0.801270 0.831078 0.773885 204.0  
GSVT 0.743548 0.778052 0.712043 300.0  
SB 0.778896 0.731917 0.832334 892.0  
SR 0.684021 0.731546 0.642374 681.0  
macro avg 0.751934 0.768148 0.740159 2077.0  
micro avg 0.746935 0.746935 0.746935 2077.0  
weighted avg 0.744881 0.748199 0.746935 2077.0  
The result of Model Number:Dataset Number:Featuregroup Number:Rescale of 96 : 1 :  
10 : 0

f1-score precision recall support  
AFIB 0.592456 0.582971 0.666633 204.0  
GSVT 0.693610 0.685561 0.702102 300.0  
SB 0.716834 0.714127 0.719566 892.0

SR 0.562441 0.565349 0.559658 681.0  
macro avg 0.641335 0.637002 0.661990 2077.0  
micro avg 0.659415 0.659415 0.659415 2077.0  
weighted avg 0.650641 0.648338 0.659415 2077.0  
The result of Model Number:Dataset Number:Featuregroup Number:Rescale of 96 : 1 :  
10 : 1

f1-score precision recall support  
AFIB 0.668137 0.701519 0.638123 204.0  
GSVT 0.688280 0.675524 0.701766 300.0  
SB 0.704031 0.696934 0.711288 892.0  
SR 0.684505 0.690619 0.678560 681.0  
macro avg 0.686238 0.691149 0.682434 2077.0  
micro avg 0.691996 0.691996 0.691996 2077.0  
weighted avg 0.691828 0.692222 0.691996 2077.0

The result of Model Number:Dataset Number:Featuregroup Number:Rescale of 97 : 0 : 0 :  
0

f1-score precision recall support  
AFIB 0.765280 0.771459 0.759266 204.0  
GSVT 0.782840 0.779002 0.786744 300.0  
SB 0.798119 0.797234 0.799013 892.0  
SR 0.792159 0.793213 0.791114 681.0  
macro avg 0.784600 0.785227 0.784034 2077.0  
micro avg 0.790747 0.790747 0.790747 2077.0  
weighted avg 0.790733 0.790750 0.790747 2077.0

The result of Model Number:Dataset Number:Featuregroup Number:Rescale of 97 : 0 : 0 :  
1

f1-score precision recall support  
AFIB 0.854371 0.871510 0.838062 204.0  
GSVT 0.874171 0.865084 0.883497 300.0  
SB 0.890338 0.886875 0.893832 892.0  
SR 0.880983 0.884658 0.877357 681.0  
macro avg 0.874966 0.877032 0.873187 2077.0  
micro avg 0.881460 0.881460 0.881460 2077.0  
weighted avg 0.881403 0.881492 0.881460 2077.0

The result of Model Number:Dataset Number:Featuregroup Number:Rescale of 97 : 0 : 1 :  
0

f1-score precision recall support  
AFIB 0.801470 0.791771 0.811445 875.0  
GSVT 0.812319 0.820648 0.804221 691.0  
SB 0.862765 0.859958 0.865598 1553.0  
SR 0.843894 0.852566 0.835427 907.0  
macro avg 0.830112 0.831236 0.829173 4026.0  
micro avg 0.836497 0.836497 0.836497 4026.0  
weighted avg 0.836534 0.836726 0.836497 4026.0

The result of Model Number:Dataset Number:Featuregroup Number:Rescale of 97 : 0 : 1 :  
1

|              | f1-score | precision | recall   | support |
|--------------|----------|-----------|----------|---------|
| AFIB         | 0.735898 | 0.740856  | 0.731115 | 875.0   |
| GSVT         | 0.749031 | 0.738628  | 0.759870 | 691.0   |
| SB           | 0.798175 | 0.792709  | 0.803723 | 1553.0  |
| SR           | 0.765829 | 0.779057  | 0.753084 | 907.0   |
| macro avg    | 0.762233 | 0.762813  | 0.761948 | 4026.0  |
| micro avg    | 0.769008 | 0.769008  | 0.769008 | 4026.0  |
| weighted avg | 0.768918 | 0.769082  | 0.769008 | 4026.0  |

The result of Model Number:Dataset Number:Featuregroup Number:Rescale of 97 : 0 : 2 :  
0

|              | f1-score | precision | recall   | support |
|--------------|----------|-----------|----------|---------|
| AFIB         | 0.735279 | 0.750029  | 0.721244 | 204.0   |
| GSVT         | 0.752320 | 0.744500  | 0.760346 | 300.0   |
| SB           | 0.766234 | 0.763253  | 0.769240 | 892.0   |
| SR           | 0.758182 | 0.761345  | 0.755062 | 681.0   |
| macro avg    | 0.753004 | 0.754782  | 0.751473 | 2077.0  |
| micro avg    | 0.758593 | 0.758593  | 0.758593 | 2077.0  |
| weighted avg | 0.758544 | 0.758620  | 0.758593 | 2077.0  |

The result of Model Number:Dataset Number:Featuregroup Number:Rescale of 97 : 0 : 2 :  
1

|              | f1-score | precision | recall   | support |
|--------------|----------|-----------|----------|---------|
| AFIB         | 0.688243 | 0.677449  | 0.699461 | 875.0   |
| GSVT         | 0.663167 | 0.682179  | 0.645263 | 691.0   |
| SB           | 0.696878 | 0.661553  | 0.736229 | 1553.0  |
| SR           | 0.566210 | 0.630076  | 0.514187 | 907.0   |
| macro avg    | 0.653624 | 0.662814  | 0.648785 | 4026.0  |
| micro avg    | 0.662602 | 0.662602  | 0.662602 | 4026.0  |
| weighted avg | 0.659778 | 0.661457  | 0.662602 | 4026.0  |

The result of Model Number:Dataset Number:Featuregroup Number:Rescale of 97 : 0 : 3 :  
0

|              | f1-score | precision | recall   | support |
|--------------|----------|-----------|----------|---------|
| AFIB         | 0.854254 | 0.844815  | 0.863923 | 875.0   |
| GSVT         | 0.869645 | 0.875000  | 0.864371 | 691.0   |
| SB           | 0.925571 | 0.924031  | 0.927121 | 1553.0  |
| SR           | 0.903034 | 0.911478  | 0.894768 | 907.0   |
| macro avg    | 0.888126 | 0.888831  | 0.887546 | 4026.0  |
| micro avg    | 0.895327 | 0.895327  | 0.895327 | 4026.0  |
| weighted avg | 0.895395 | 0.895571  | 0.895327 | 4026.0  |

The result of Model Number:Dataset Number:Featuregroup Number:Rescale of 97 : 0 : 3 :  
1

|      | f1-score | precision | recall   | support |
|------|----------|-----------|----------|---------|
| AFIB | 0.805794 | 0.844858  | 0.770272 | 204.0   |

GSVT 0.839353 0.828385 0.850785 300.0  
SB 0.861960 0.855405 0.868628 892.0  
SR 0.837960 0.840464 0.835508 681.0  
macro avg 0.836266 0.842278 0.831298 2077.0  
micro avg 0.845531 0.845531 0.845531 2077.0  
weighted avg 0.845309 0.845568 0.845531 2077.0  
The result of Model Number:Dataset Number:Featuregroup Number:Rescale of 97 : 0 : 4 :  
0

f1-score precision recall support  
AFIB 0.874624 0.887884 0.861776 204.0  
GSVT 0.888687 0.881196 0.896354 300.0  
SB 0.908400 0.905469 0.911351 892.0  
SR 0.898648 0.901986 0.895359 681.0  
macro avg 0.892590 0.894134 0.891210 2077.0  
micro avg 0.899072 0.899072 0.899072 2077.0  
weighted avg 0.899038 0.899094 0.899072 2077.0  
The result of Model Number:Dataset Number:Featuregroup Number:Rescale of 97 : 0 : 4 :  
1

f1-score precision recall support  
AFIB 0.693923 0.705191 0.683046 875.0  
GSVT 0.738007 0.740320 0.735754 691.0  
SB 0.802915 0.800148 0.805705 1553.0  
SR 0.760126 0.751660 0.768832 907.0  
macro avg 0.748743 0.749330 0.748334 4026.0  
micro avg 0.758734 0.758734 0.758734 4026.0  
weighted avg 0.758447 0.758318 0.758734 4026.0  
The result of Model Number:Dataset Number:Featuregroup Number:Rescale of 97 : 0 : 5 :  
0

f1-score precision recall support  
AFIB 0.688540 0.684038 0.693162 875.0  
GSVT 0.709005 0.715037 0.703168 691.0  
SB 0.754831 0.753187 0.756484 1553.0  
SR 0.736436 0.739392 0.733513 907.0  
macro avg 0.722203 0.722914 0.721582 4026.0  
micro avg 0.728396 0.728396 0.728396 4026.0  
weighted avg 0.728414 0.728503 0.728396 4026.0  
The result of Model Number:Dataset Number:Featuregroup Number:Rescale of 97 : 0 : 5 :  
1

f1-score precision recall support  
AFIB 0.851678 0.859106 0.844590 204.0  
GSVT 0.881131 0.879693 0.882596 300.0  
SB 0.899861 0.897666 0.902077 892.0  
SR 0.891611 0.892954 0.890301 681.0  
macro avg 0.881070 0.882355 0.879891 2077.0

micro avg 0.889756 0.889756 0.889756 2077.0  
weighted avg 0.889718 0.889738 0.889756 2077.0  
The result of Model Number:Dataset Number:Featuregroup Number:Rescale of 97 : 0 : 6 :  
0

|              | f1-score | precision | recall   | support |
|--------------|----------|-----------|----------|---------|
| AFIB         | 0.633770 | 0.624966  | 0.642885 | 875.0   |
| GSVT         | 0.656418 | 0.665175  | 0.647974 | 691.0   |
| SB           | 0.697329 | 0.695900  | 0.698766 | 1553.0  |
| SR           | 0.679179 | 0.684427  | 0.674012 | 907.0   |
| macro avg    | 0.666674 | 0.667617  | 0.665909 | 4026.0  |
| micro avg    | 0.672327 | 0.672327  | 0.672327 | 4026.0  |
| weighted avg | 0.672404 | 0.672625  | 0.672327 | 4026.0  |

The result of Model Number:Dataset Number:Featuregroup Number:Rescale of 97 : 0 : 6 :  
1

|              | f1-score | precision | recall   | support |
|--------------|----------|-----------|----------|---------|
| AFIB         | 0.714860 | 0.699584  | 0.730860 | 875.0   |
| GSVT         | 0.740283 | 0.751603  | 0.729365 | 691.0   |
| SB           | 0.789140 | 0.789244  | 0.789039 | 1553.0  |
| SR           | 0.768810 | 0.776772  | 0.761013 | 907.0   |
| macro avg    | 0.753273 | 0.754301  | 0.752569 | 4026.0  |
| micro avg    | 0.759838 | 0.759838  | 0.759838 | 4026.0  |
| weighted avg | 0.760031 | 0.760488  | 0.759838 | 4026.0  |

The result of Model Number:Dataset Number:Featuregroup Number:Rescale of 97 : 0 : 7 :  
0

|              | f1-score | precision | recall   | support |
|--------------|----------|-----------|----------|---------|
| AFIB         | 0.714515 | 0.720283  | 0.708899 | 204.0   |
| GSVT         | 0.730910 | 0.727326  | 0.734555 | 300.0   |
| SB           | 0.745175 | 0.744348  | 0.746010 | 892.0   |
| SR           | 0.739611 | 0.740594  | 0.738635 | 681.0   |
| macro avg    | 0.732552 | 0.733138  | 0.732024 | 2077.0  |
| micro avg    | 0.738292 | 0.738292  | 0.738292 | 2077.0  |
| weighted avg | 0.738279 | 0.738295  | 0.738292 | 2077.0  |

The result of Model Number:Dataset Number:Featuregroup Number:Rescale of 97 : 0 : 7 :  
1

|              | f1-score | precision | recall   | support |
|--------------|----------|-----------|----------|---------|
| AFIB         | 0.817936 | 0.828767  | 0.807507 | 204.0   |
| GSVT         | 0.842619 | 0.839578  | 0.845701 | 300.0   |
| SB           | 0.853114 | 0.850459  | 0.855789 | 892.0   |
| SR           | 0.843818 | 0.845443  | 0.842223 | 681.0   |
| macro avg    | 0.839372 | 0.841062  | 0.837805 | 2077.0  |
| micro avg    | 0.845142 | 0.845142  | 0.845142 | 2077.0  |
| weighted avg | 0.845095 | 0.845112  | 0.845142 | 2077.0  |

The result of Model Number:Dataset Number:Featuregroup Number:Rescale of 97 : 0 : 8 :  
0

f1-score precision recall support  
AFIB 0.751052 0.748620 0.753522 875.0  
GSVT 0.759761 0.762121 0.757490 691.0  
SB 0.801671 0.799926 0.803426 1553.0  
SR 0.786887 0.790600 0.783239 907.0  
macro avg 0.774843 0.775317 0.774419 4026.0  
micro avg 0.780148 0.780148 0.780148 4026.0  
weighted avg 0.780146 0.780186 0.780148 4026.0  
The result of Model Number:Dataset Number:Featuregroup Number:Rescale of 97 : 0 : 8 :  
1

f1-score precision recall support  
AFIB 0.673770 0.677455 0.670148 875.0  
GSVT 0.670559 0.664905 0.676377 691.0  
SB 0.705261 0.698582 0.712071 1553.0  
SR 0.679013 0.691679 0.666812 907.0  
macro avg 0.682151 0.683155 0.681352 4026.0  
micro avg 0.686637 0.686637 0.686637 4026.0  
weighted avg 0.686547 0.686655 0.686637 4026.0  
The result of Model Number:Dataset Number:Featuregroup Number:Rescale of 97 : 0 : 9 :  
0

f1-score precision recall support  
AFIB 0.787187 0.807795 0.767963 204.0  
GSVT 0.740689 0.762216 0.720748 300.0  
SB 0.781585 0.754067 0.811202 892.0  
SR 0.708411 0.731482 0.686894 681.0  
macro avg 0.754468 0.763890 0.746702 2077.0  
micro avg 0.753132 0.753132 0.753132 2077.0  
weighted avg 0.752236 0.753116 0.753132 2077.0  
The result of Model Number:Dataset Number:Featuregroup Number:Rescale of 97 : 0 : 9 :  
1

f1-score precision recall support  
AFIB 0.645135 0.637036 0.653631 875.0  
GSVT 0.598558 0.616680 0.583472 691.0  
SB 0.644443 0.596896 0.701923 1553.0  
SR 0.501075 0.613277 0.427277 907.0  
macro avg 0.597303 0.615972 0.591576 4026.0  
micro avg 0.609223 0.609223 0.609223 4026.0  
weighted avg 0.604419 0.612706 0.609223 4026.0  
The result of Model Number:Dataset Number:Featuregroup Number:Rescale of 97 : 0 :  
10 : 0

f1-score precision recall support  
AFIB 0.791565 0.845612 0.744349 204.0  
GSVT 0.836763 0.819712 0.854612 300.0  
SB 0.857518 0.850000 0.865202 892.0

SR 0.836366 0.839151 0.833673 681.0  
macro avg 0.830553 0.838619 0.824459 2077.0  
micro avg 0.841465 0.841465 0.841465 2077.0  
weighted avg 0.841107 0.841637 0.841465 2077.0  
The result of Model Number:Dataset Number:Featuregroup Number:Rescale of 97 : 0 :  
10 : 1

f1-score precision recall support  
AFIB 0.844279 0.852071 0.836675 875.0  
GSVT 0.863994 0.861661 0.866369 691.0  
SB 0.920165 0.911516 0.928989 1553.0  
SR 0.894742 0.903720 0.885958 907.0  
macro avg 0.880795 0.882242 0.879498 4026.0  
micro avg 0.888484 0.888484 0.888484 4026.0  
weighted avg 0.888304 0.888283 0.888484 4026.0  
The result of Model Number:Dataset Number:Featuregroup Number:Rescale of 97 : 1 : 0 :  
0

f1-score precision recall support  
AFIB 0.771952 0.783294 0.761006 204.0  
GSVT 0.791511 0.784782 0.798373 300.0  
SB 0.805191 0.801969 0.808440 892.0  
SR 0.797227 0.801141 0.793362 681.0  
macro avg 0.791471 0.792796 0.790295 2077.0  
micro avg 0.797383 0.797383 0.797383 2077.0  
weighted avg 0.797339 0.797381 0.797383 2077.0  
The result of Model Number:Dataset Number:Featuregroup Number:Rescale of 97 : 1 : 0 :  
1

f1-score precision recall support  
AFIB 0.872324 0.883528 0.861444 875.0  
GSVT 0.881974 0.874842 0.889365 691.0  
SB 0.943460 0.940624 0.946316 1553.0  
SR 0.920098 0.919711 0.920497 907.0  
macro avg 0.904464 0.904676 0.904406 4026.0  
micro avg 0.912279 0.912279 0.912279 4026.0  
weighted avg 0.912183 0.912213 0.912279 4026.0  
The result of Model Number:Dataset Number:Featuregroup Number:Rescale of 97 : 1 : 1 :  
0

f1-score precision recall support  
AFIB 0.785239 0.809511 0.763064 204.0  
GSVT 0.733011 0.748946 0.718280 300.0  
SB 0.773141 0.738827 0.810835 892.0  
SR 0.696128 0.731900 0.663789 681.0  
macro avg 0.746880 0.757296 0.738992 2077.0  
micro avg 0.744562 0.744562 0.744562 2077.0  
weighted avg 0.743282 0.744960 0.744562 2077.0



The result of Model Number:Dataset Number:Featuregroup Number:Rescale of 97 : 1 : 1 : 1

|              | f1-score | precision | recall   | support |
|--------------|----------|-----------|----------|---------|
| AFIB         | 0.612810 | 0.631394  | 0.595314 | 875.0   |
| GSVT         | 0.654183 | 0.649647  | 0.658819 | 691.0   |
| SB           | 0.715756 | 0.713018  | 0.718520 | 1553.0  |
| SR           | 0.676933 | 0.666773  | 0.687447 | 907.0   |
| macro avg    | 0.664921 | 0.665208  | 0.665025 | 4026.0  |
| micro avg    | 0.674496 | 0.674496  | 0.674496 | 4026.0  |
| weighted avg | 0.674068 | 0.673983  | 0.674496 | 4026.0  |

The result of Model Number:Dataset Number:Featuregroup Number:Rescale of 97 : 1 : 2 : 0

|              | f1-score | precision | recall   | support |
|--------------|----------|-----------|----------|---------|
| AFIB         | 0.807801 | 0.809073  | 0.806638 | 204.0   |
| GSVT         | 0.827338 | 0.826047  | 0.828702 | 300.0   |
| SB           | 0.844405 | 0.843375  | 0.845444 | 892.0   |
| SR           | 0.838491 | 0.840101  | 0.836892 | 681.0   |
| macro avg    | 0.829509 | 0.829649  | 0.829419 | 2077.0  |
| micro avg    | 0.836410 | 0.836410  | 0.836410 | 2077.0  |
| weighted avg | 0.836406 | 0.836429  | 0.836410 | 2077.0  |

The result of Model Number:Dataset Number:Featuregroup Number:Rescale of 97 : 1 : 2 : 1

|              | f1-score | precision | recall   | support |
|--------------|----------|-----------|----------|---------|
| AFIB         | 0.797907 | 0.843297  | 0.757682 | 204.0   |
| GSVT         | 0.843207 | 0.833922  | 0.852744 | 300.0   |
| SB           | 0.855750 | 0.847235  | 0.864467 | 892.0   |
| SR           | 0.845809 | 0.848701  | 0.843071 | 681.0   |
| macro avg    | 0.835668 | 0.843289  | 0.829491 | 2077.0  |
| micro avg    | 0.845270 | 0.845270  | 0.845270 | 2077.0  |
| weighted avg | 0.844998 | 0.845406  | 0.845270 | 2077.0  |

The result of Model Number:Dataset Number:Featuregroup Number:Rescale of 97 : 1 : 3 : 0

|              | f1-score | precision | recall   | support |
|--------------|----------|-----------|----------|---------|
| AFIB         | 0.915587 | 0.923224  | 0.908391 | 204.0   |
| GSVT         | 0.939774 | 0.935446  | 0.944162 | 300.0   |
| SB           | 0.953946 | 0.950558  | 0.957366 | 892.0   |
| SR           | 0.945136 | 0.949369  | 0.940989 | 681.0   |
| macro avg    | 0.938611 | 0.939649  | 0.937727 | 2077.0  |
| micro avg    | 0.945279 | 0.945279  | 0.945279 | 2077.0  |
| weighted avg | 0.945243 | 0.945301  | 0.945279 | 2077.0  |

The result of Model Number:Dataset Number:Featuregroup Number:Rescale of 97 : 1 : 3 : 1

|      | f1-score | precision | recall   | support |
|------|----------|-----------|----------|---------|
| AFIB | 0.721101 | 0.752332  | 0.692565 | 204.0   |

GSVT 0.674104 0.680395 0.668267 300.0  
SB 0.698758 0.664404 0.736908 892.0  
SR 0.622783 0.662085 0.588086 681.0  
macro avg 0.679186 0.689804 0.671456 2077.0  
micro avg 0.673843 0.673843 0.673843 2077.0  
weighted avg 0.672481 0.674590 0.673843 2077.0  
The result of Model Number:Dataset Number:Featuregroup Number:Rescale of 97 : 1 : 4 :  
0

f1-score precision recall support

AFIB 0.687447 0.690254 0.684683 875.0  
GSVT 0.640145 0.668397 0.614290 691.0  
SB 0.687478 0.622766 0.767208 1553.0  
SR 0.518588 0.645432 0.433587 907.0  
macro avg 0.633415 0.656712 0.624942 4026.0  
micro avg 0.647866 0.647866 0.647866 4026.0  
weighted avg 0.641299 0.650372 0.647866 4026.0  
The result of Model Number:Dataset Number:Featuregroup Number:Rescale of 97 : 1 : 4 :  
1

f1-score precision recall support

AFIB 0.786692 0.816649 0.759026 204.0  
GSVT 0.811756 0.803574 0.820142 300.0  
SB 0.828003 0.823882 0.832179 892.0  
SR 0.818002 0.818517 0.817515 681.0  
macro avg 0.811113 0.815655 0.807215 2077.0  
micro avg 0.818447 0.818447 0.818447 2077.0  
weighted avg 0.818320 0.818479 0.818447 2077.0  
The result of Model Number:Dataset Number:Featuregroup Number:Rescale of 97 : 1 : 5 :  
0

f1-score precision recall support

AFIB 0.581326 0.642794 0.530890 204.0  
GSVT 0.668891 0.661150 0.676944 300.0  
SB 0.707204 0.704296 0.710138 892.0  
SR 0.692017 0.681767 0.702587 681.0  
macro avg 0.662360 0.672502 0.655140 2077.0  
micro avg 0.685262 0.685262 0.685262 2077.0  
weighted avg 0.684327 0.684637 0.685262 2077.0  
The result of Model Number:Dataset Number:Featuregroup Number:Rescale of 97 : 1 : 5 :  
1

f1-score precision recall support

AFIB 0.654256 0.671385 0.638279 204.0  
GSVT 0.615610 0.633502 0.599036 300.0  
SB 0.649600 0.626729 0.674216 892.0  
SR 0.588783 0.607958 0.570900 681.0  
macro avg 0.627062 0.634893 0.620608 2077.0

micro avg 0.625952 0.625952 0.625952 2077.0  
weighted avg 0.625208 0.625939 0.625952 2077.0  
The result of Model Number:Dataset Number:Featuregroup Number:Rescale of 97 : 1 : 6 :  
0

|              | f1-score | precision | recall   | support |
|--------------|----------|-----------|----------|---------|
| AFIB         | 0.665325 | 0.683586  | 0.648063 | 204.0   |
| GSVT         | 0.680372 | 0.669920  | 0.691221 | 300.0   |
| SB           | 0.695321 | 0.688595  | 0.702181 | 892.0   |
| SR           | 0.677747 | 0.686216  | 0.669490 | 681.0   |
| macro avg    | 0.679691 | 0.682079  | 0.677738 | 2077.0  |
| micro avg    | 0.684564 | 0.684564  | 0.684564 | 2077.0  |
| weighted avg | 0.684454 | 0.684626  | 0.684564 | 2077.0  |

The result of Model Number:Dataset Number:Featuregroup Number:Rescale of 97 : 1 : 6 :  
1

|              | f1-score | precision | recall   | support |
|--------------|----------|-----------|----------|---------|
| AFIB         | 0.662494 | 0.732544  | 0.605016 | 204.0   |
| GSVT         | 0.762286 | 0.753464  | 0.771462 | 300.0   |
| SB           | 0.805948 | 0.802634  | 0.809291 | 892.0   |
| SR           | 0.788640 | 0.776959  | 0.800687 | 681.0   |
| macro avg    | 0.754842 | 0.766400  | 0.746614 | 2077.0  |
| micro avg    | 0.780942 | 0.780942  | 0.780942 | 2077.0  |
| weighted avg | 0.779877 | 0.780230  | 0.780942 | 2077.0  |

The result of Model Number:Dataset Number:Featuregroup Number:Rescale of 97 : 1 : 7 :  
0

|              | f1-score | precision | recall   | support |
|--------------|----------|-----------|----------|---------|
| AFIB         | 0.695505 | 0.708832  | 0.682847 | 204.0   |
| GSVT         | 0.717622 | 0.713926  | 0.721423 | 300.0   |
| SB           | 0.735369 | 0.734224  | 0.736523 | 892.0   |
| SR           | 0.728123 | 0.727400  | 0.728871 | 681.0   |
| macro avg    | 0.719155 | 0.721095  | 0.717416 | 2077.0  |
| micro avg    | 0.726561 | 0.726561  | 0.726561 | 2077.0  |
| weighted avg | 0.726515 | 0.726561  | 0.726561 | 2077.0  |

The result of Model Number:Dataset Number:Featuregroup Number:Rescale of 97 : 1 : 7 :  
1

|              | f1-score | precision | recall   | support |
|--------------|----------|-----------|----------|---------|
| AFIB         | 0.731510 | 0.784384  | 0.685818 | 204.0   |
| GSVT         | 0.692892 | 0.696640  | 0.689468 | 300.0   |
| SB           | 0.723739 | 0.680342  | 0.773068 | 892.0   |
| SR           | 0.635497 | 0.685845  | 0.592118 | 681.0   |
| macro avg    | 0.695910 | 0.711803  | 0.685118 | 2077.0  |
| micro avg    | 0.693094 | 0.693094  | 0.693094 | 2077.0  |
| weighted avg | 0.691115 | 0.694719  | 0.693094 | 2077.0  |

The result of Model Number:Dataset Number:Featuregroup Number:Rescale of 97 : 1 : 8 :  
0

f1-score precision recall support  
AFIB 0.747563 0.798606 0.702972 204.0  
GSVT 0.790248 0.774145 0.807105 300.0  
SB 0.809849 0.802749 0.817106 892.0  
SR 0.789873 0.792503 0.787330 681.0  
macro avg 0.784383 0.792001 0.778628 2077.0  
micro avg 0.794689 0.794689 0.794689 2077.0  
weighted avg 0.794351 0.794851 0.794689 2077.0  
The result of Model Number:Dataset Number:Featuregroup Number:Rescale of 97 : 1 : 8 :  
1

f1-score precision recall support  
AFIB 0.745952 0.762337 0.730535 204.0  
GSVT 0.769992 0.763769 0.776423 300.0  
SB 0.786130 0.785163 0.787099 892.0  
SR 0.779493 0.778815 0.780177 681.0  
macro avg 0.770392 0.772521 0.768559 2077.0  
micro avg 0.777732 0.777732 0.777732 2077.0  
weighted avg 0.777677 0.777750 0.777732 2077.0  
The result of Model Number:Dataset Number:Featuregroup Number:Rescale of 97 : 1 : 9 :  
0

f1-score precision recall support  
AFIB 0.923005 0.935227 0.911235 204.0  
GSVT 0.950858 0.947426 0.954336 300.0  
SB 0.962701 0.959705 0.965720 892.0  
SR 0.952211 0.954045 0.950411 681.0  
macro avg 0.947194 0.949101 0.945426 2077.0  
micro avg 0.953705 0.953705 0.953705 2077.0  
weighted avg 0.953652 0.953672 0.953705 2077.0  
The result of Model Number:Dataset Number:Featuregroup Number:Rescale of 97 : 1 : 9 :  
1

f1-score precision recall support  
AFIB 0.779993 0.784442 0.775724 204.0  
GSVT 0.796042 0.790301 0.801876 300.0  
SB 0.812119 0.809153 0.815122 892.0  
SR 0.803482 0.808758 0.798295 681.0  
macro avg 0.797909 0.798163 0.797754 2077.0  
micro avg 0.803822 0.803822 0.803822 2077.0  
weighted avg 0.803810 0.803873 0.803822 2077.0  
The result of Model Number:Dataset Number:Featuregroup Number:Rescale of 97 : 1 :  
10 : 0

f1-score precision recall support  
AFIB 0.901298 0.914814 0.888432 204.0  
GSVT 0.933845 0.931365 0.936343 300.0  
SB 0.955966 0.954692 0.957251 892.0

SR 0.946616 0.945396 0.947870 681.0  
macro avg 0.934431 0.936567 0.932474 2077.0  
micro avg 0.944396 0.944396 0.944396 2077.0  
weighted avg 0.944336 0.944358 0.944396 2077.0  
The result of Model Number:Dataset Number:Featuregroup Number:Rescale of 97 : 1 :  
10 : 1

|              | f1-score | precision | recall   | support |
|--------------|----------|-----------|----------|---------|
| AFIB         | 0.654747 | 0.644707  | 0.665212 | 875.0   |
| GSVT         | 0.677323 | 0.683962  | 0.670945 | 691.0   |
| SB           | 0.720853 | 0.719169  | 0.722567 | 1553.0  |
| SR           | 0.702845 | 0.711757  | 0.694169 | 907.0   |
| macro avg    | 0.688942 | 0.689899  | 0.688224 | 4026.0  |
| micro avg    | 0.694844 | 0.694844  | 0.694844 | 4026.0  |
| weighted avg | 0.694957 | 0.695273  | 0.694844 | 4026.0  |
